# Supplementary material for: Contrasting and combining transcriptome complexity captured by short and long RNA sequencing reads
Source: HighWire-hosted journal article supplement (doi:10.1101/gr.278659.123), 2024-09-25

A

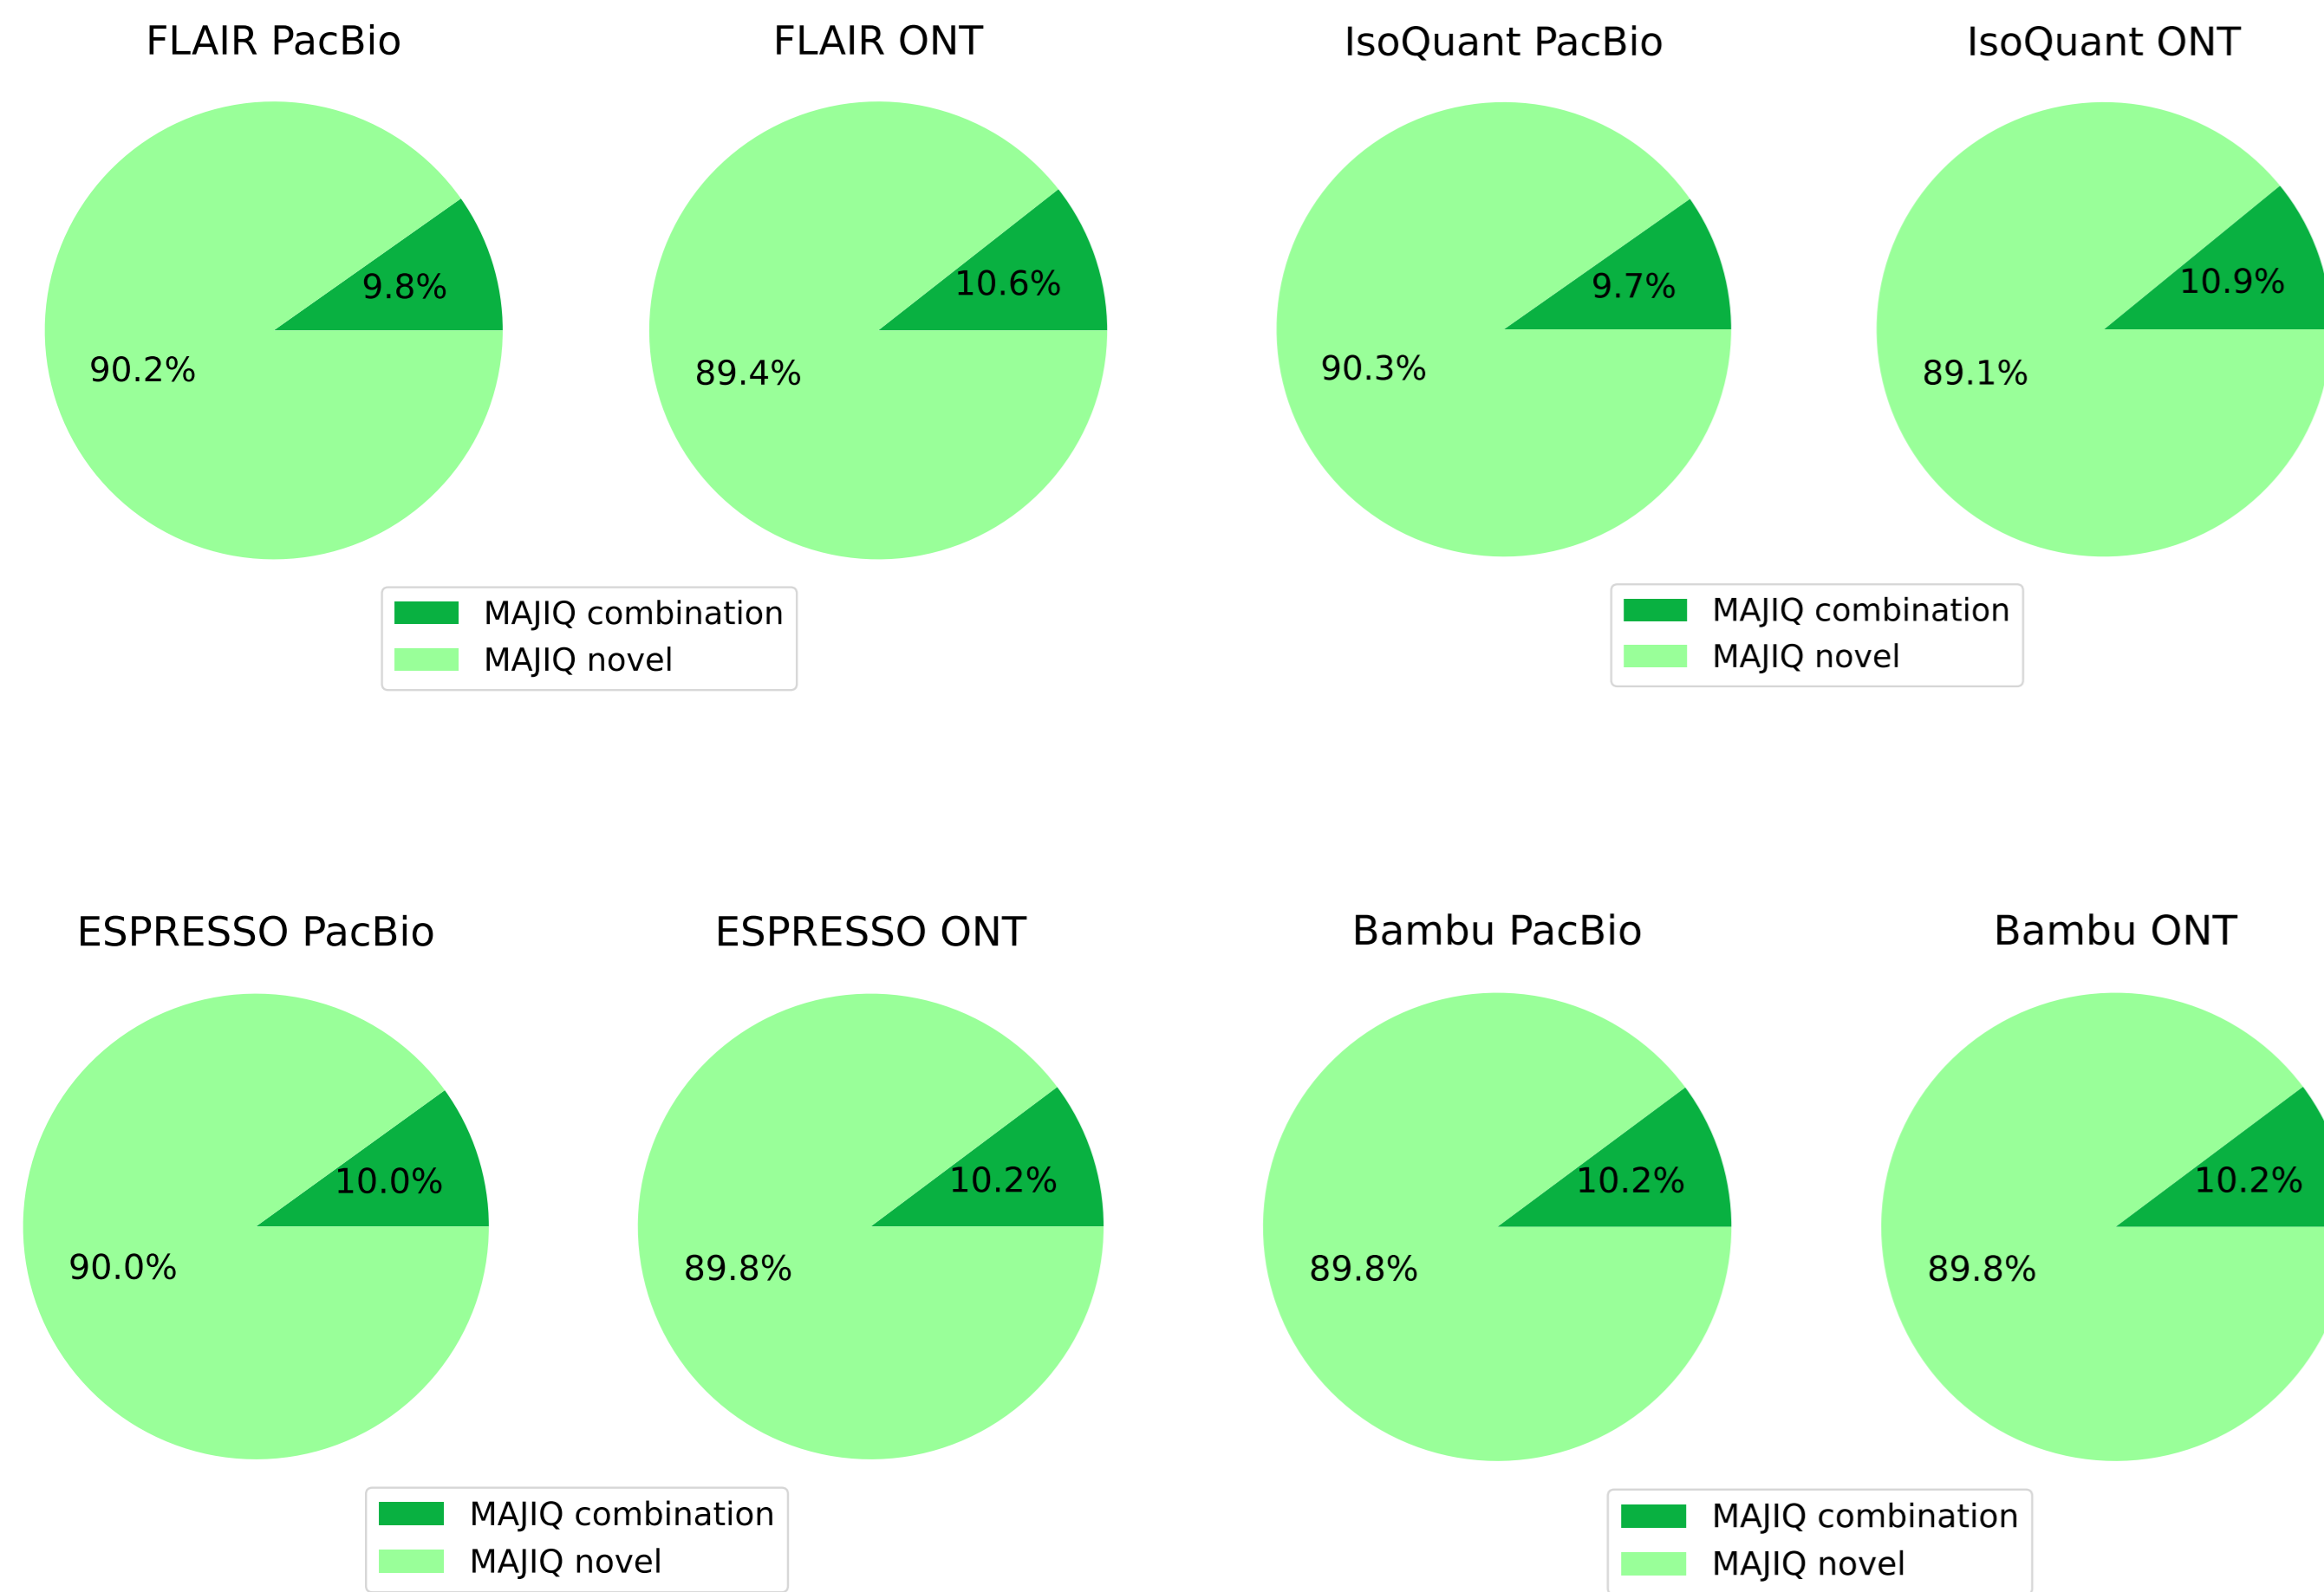

B

FLAIR PacBio de novo junction

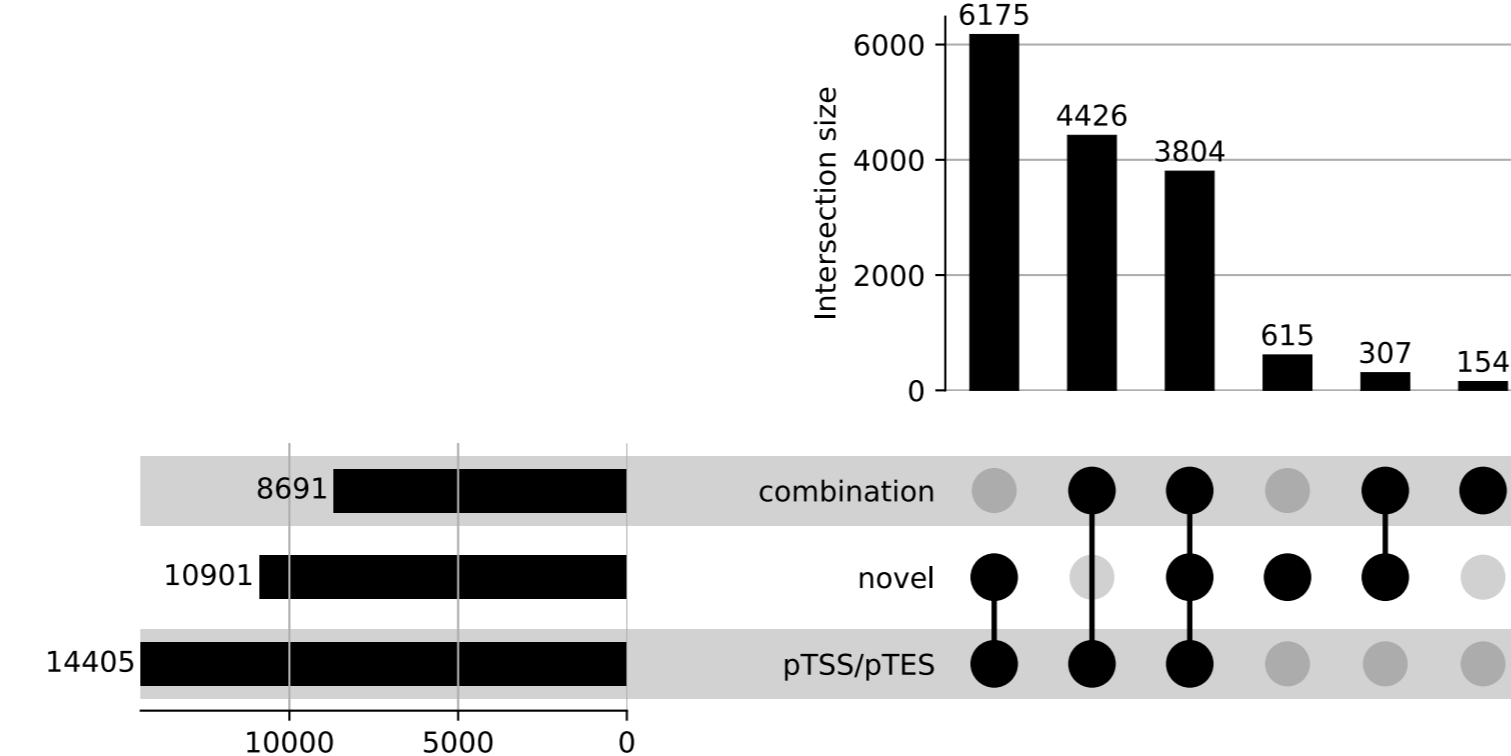

IsoQuant PacBio de novo junction

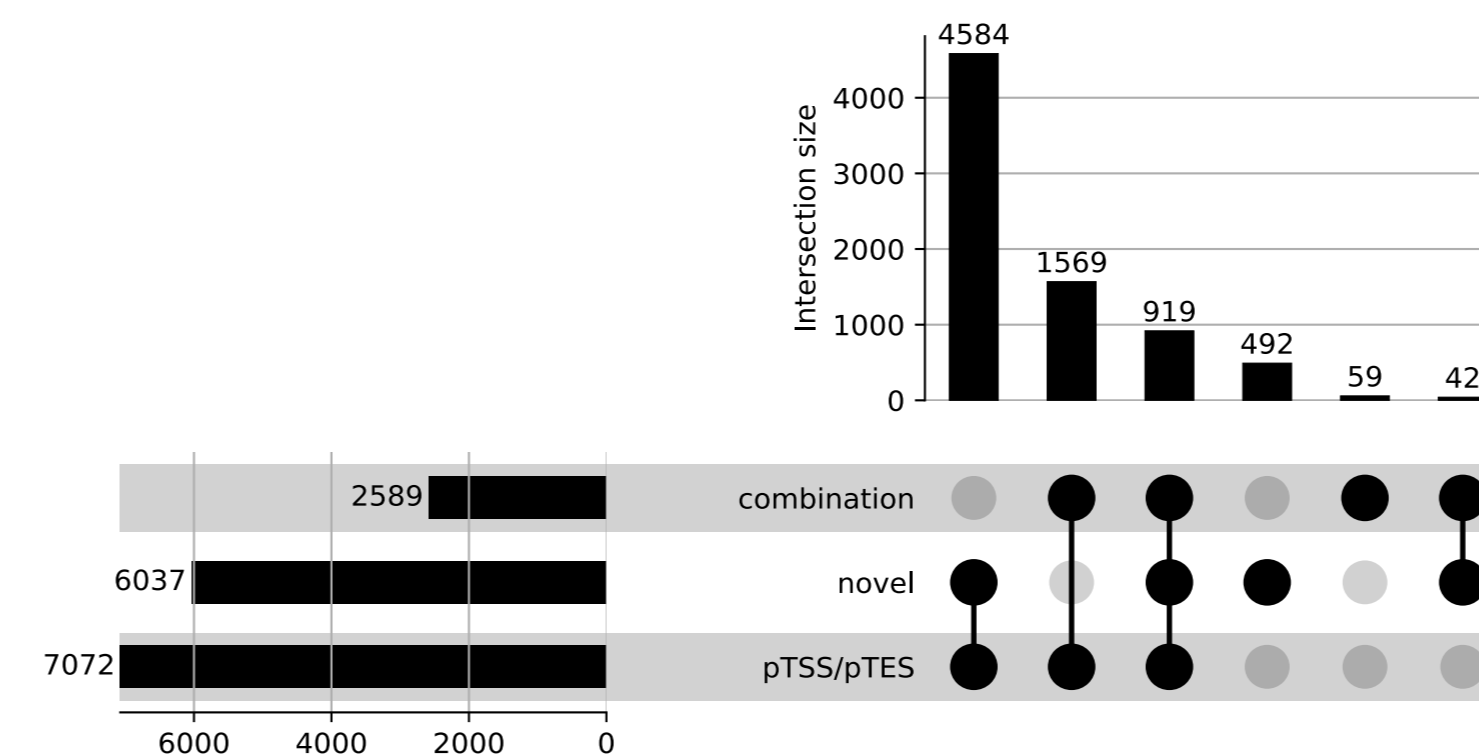

ESPRESSO PacBio de novo junction

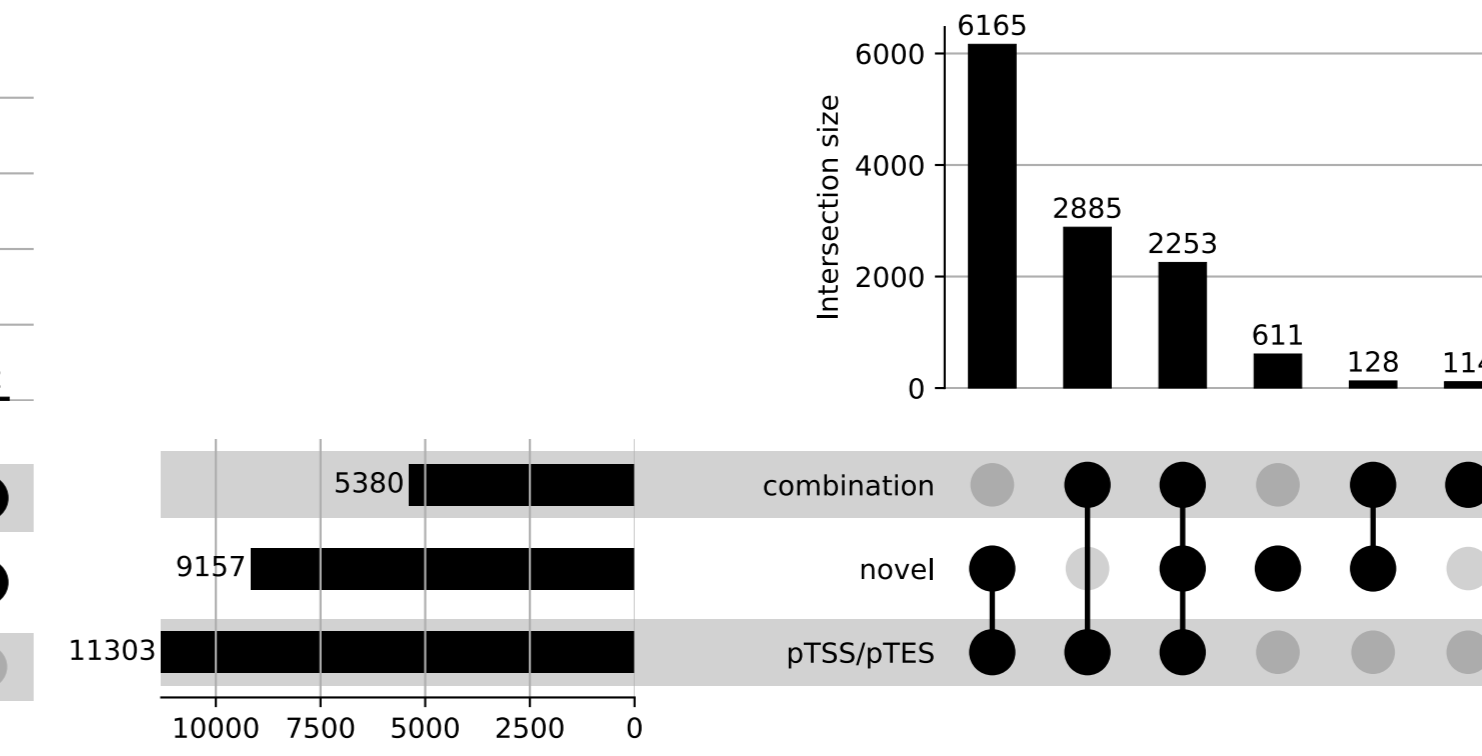

Bambu PacBio de novo junction

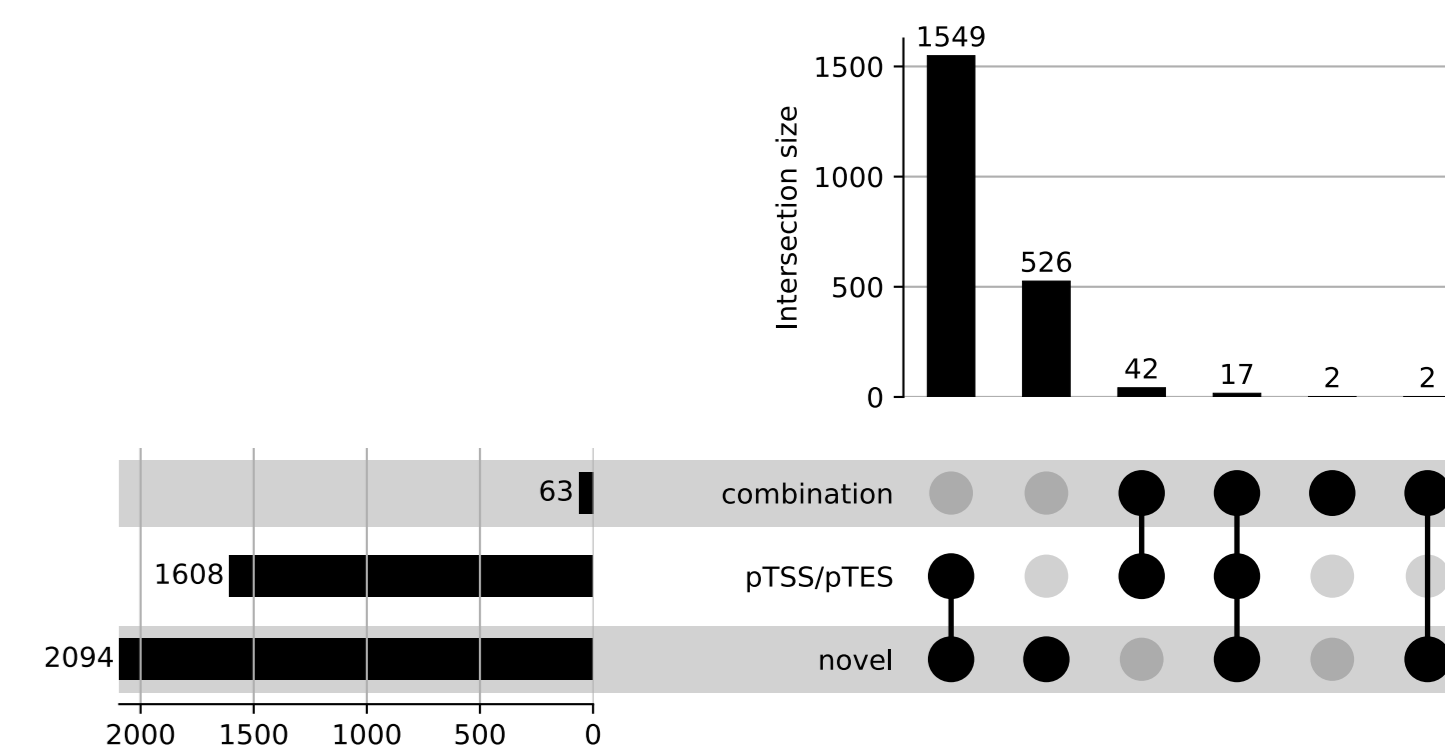

FLAIR ONT de novo junction

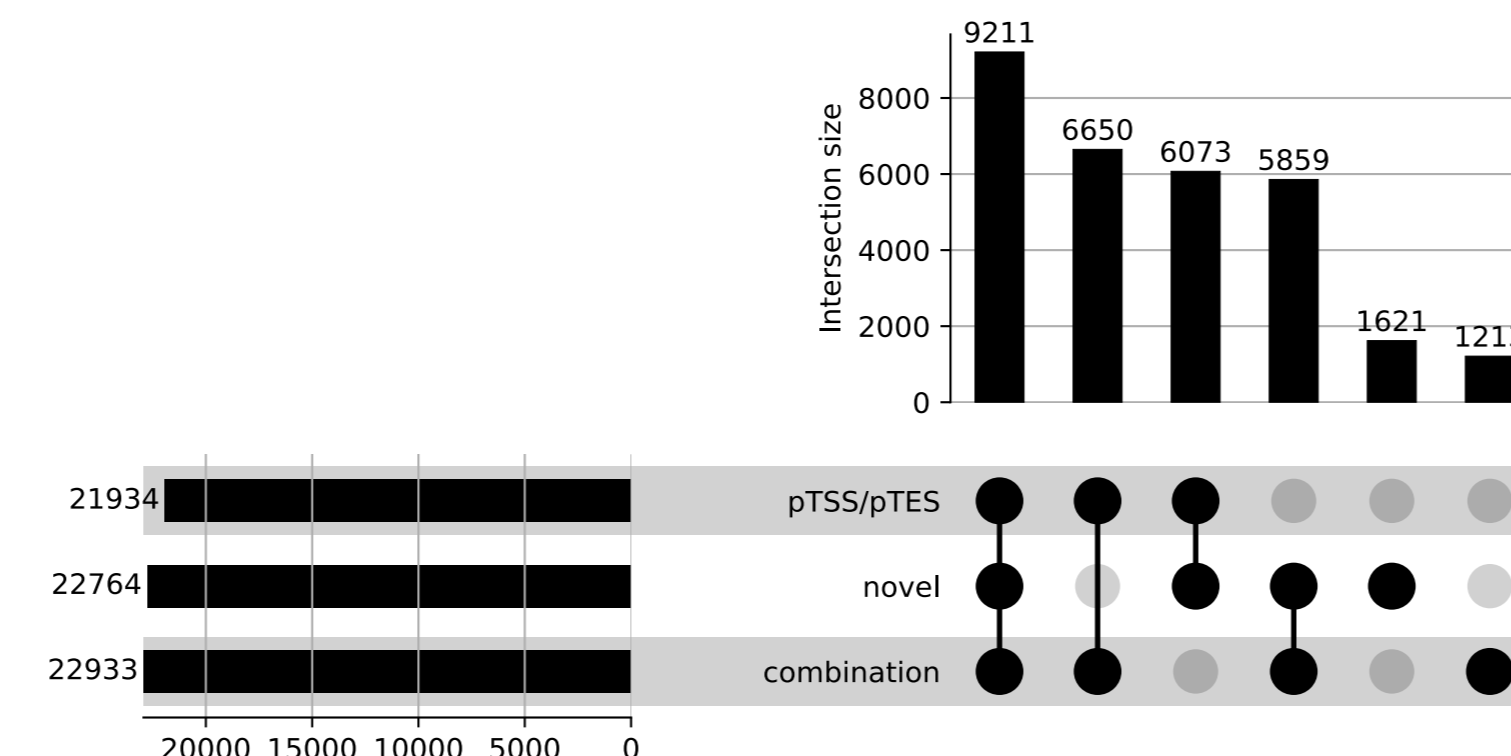

IsoQuant ONT de novo junction

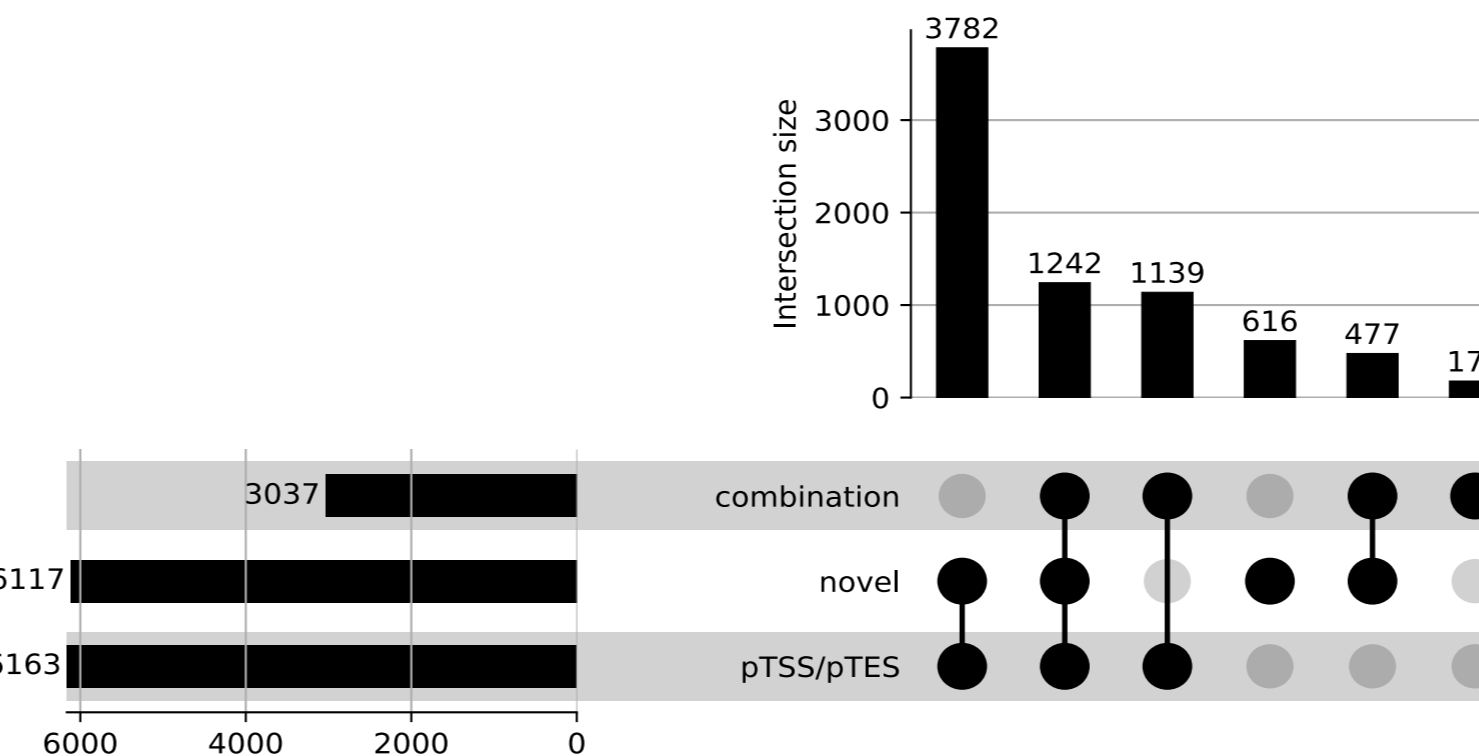

ESPRESSO ONT de novo junction

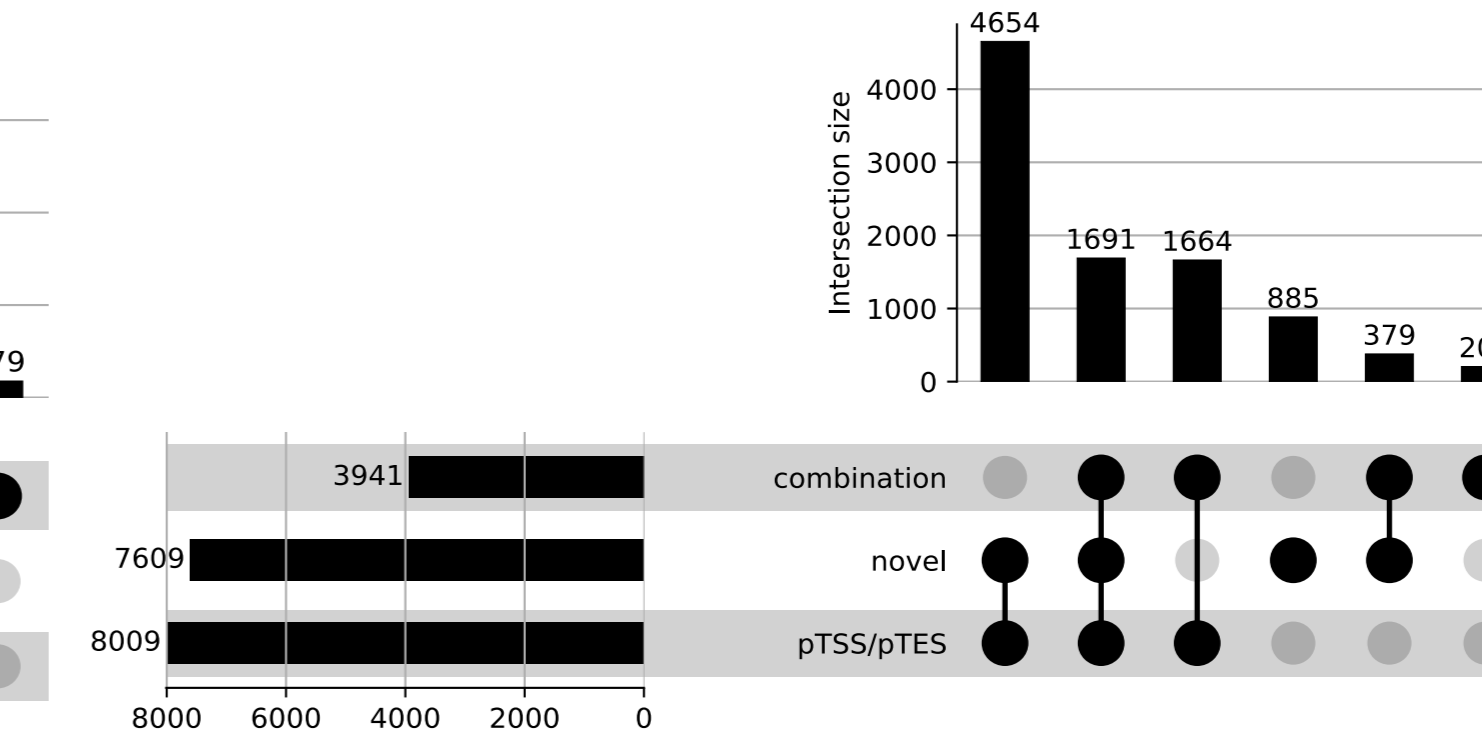

Bambu ONT de novo junction

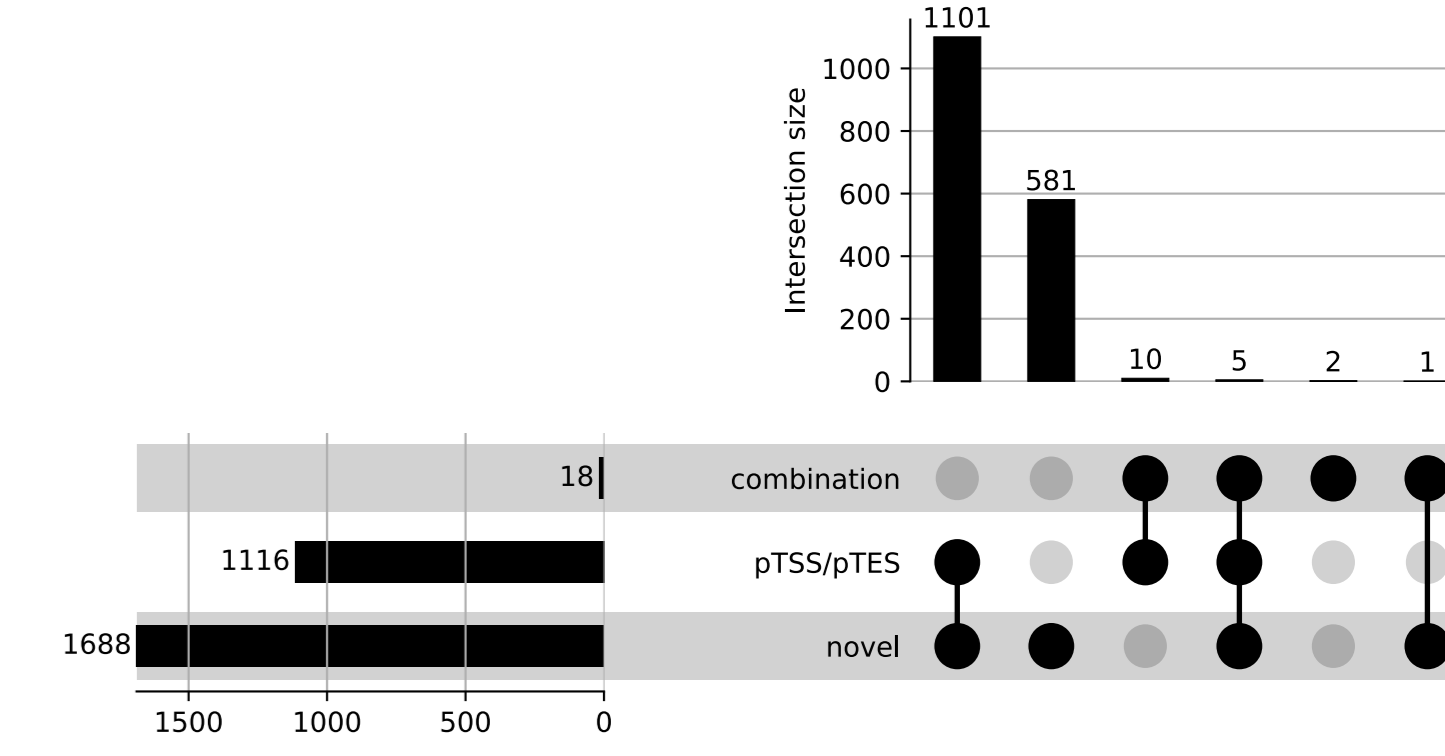

C

FLAIR PacBio novel splice site

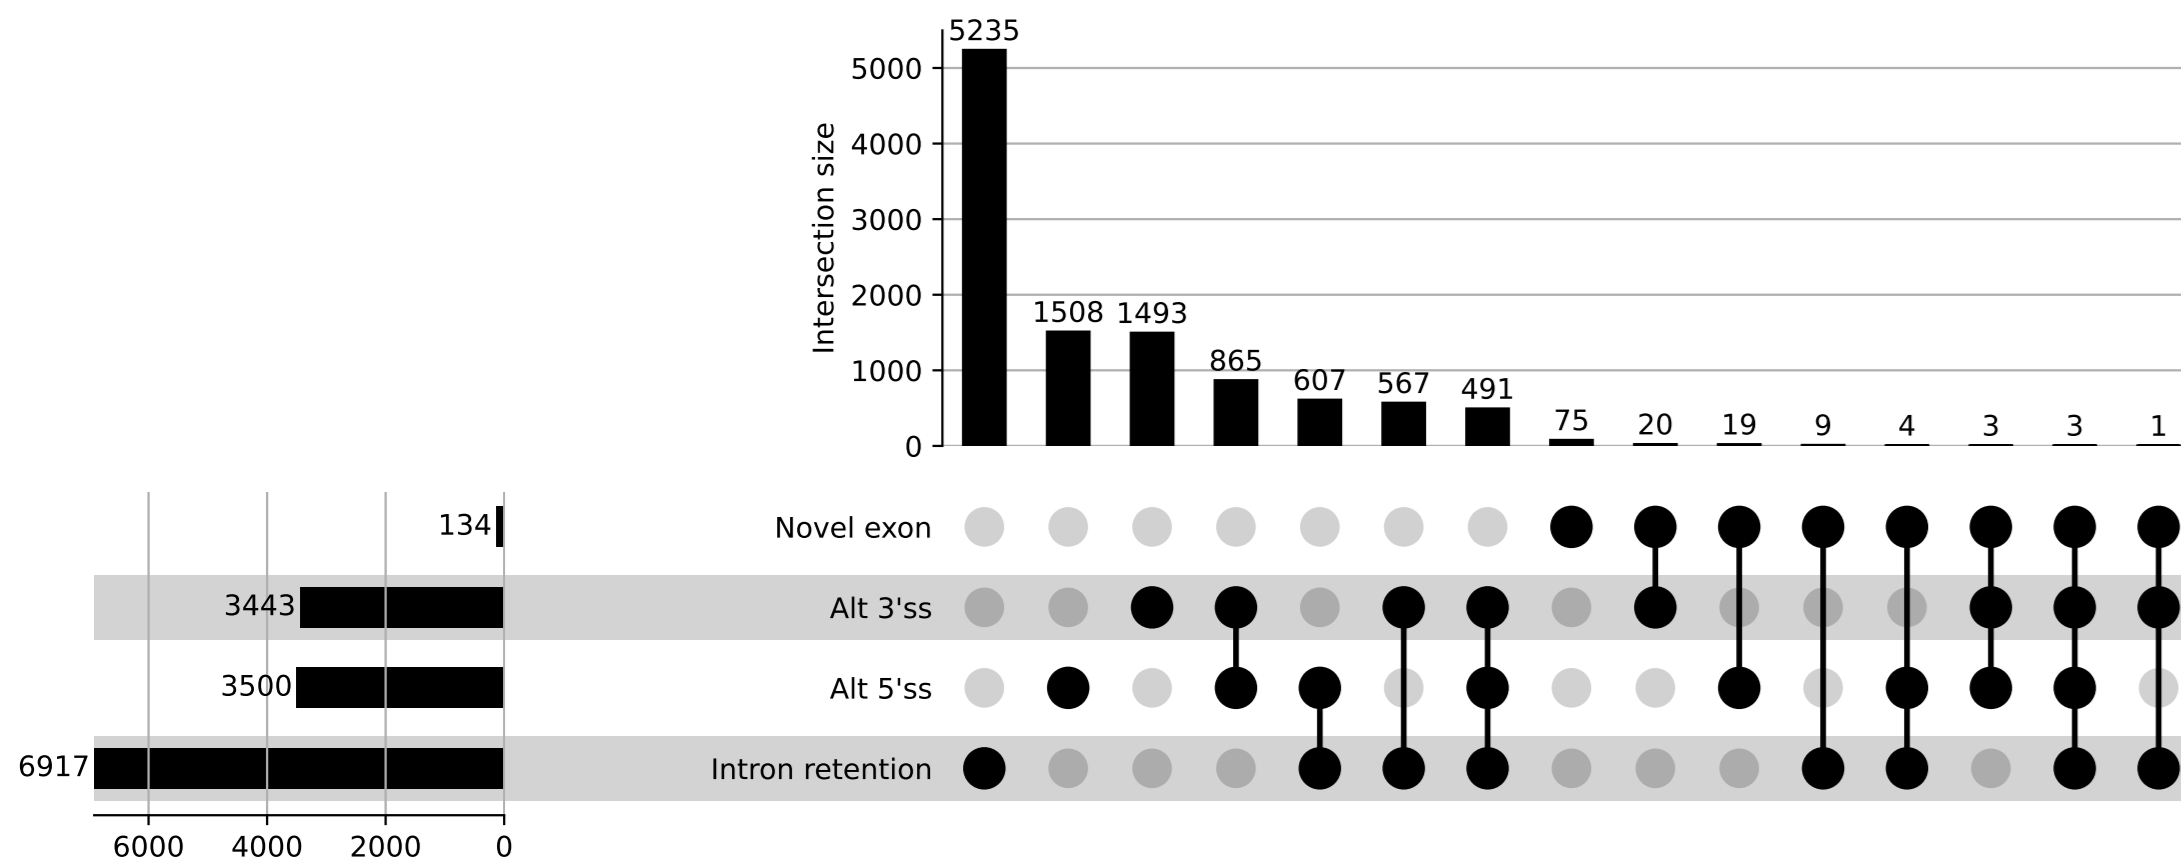

IsoQuant PacBio novel splice site

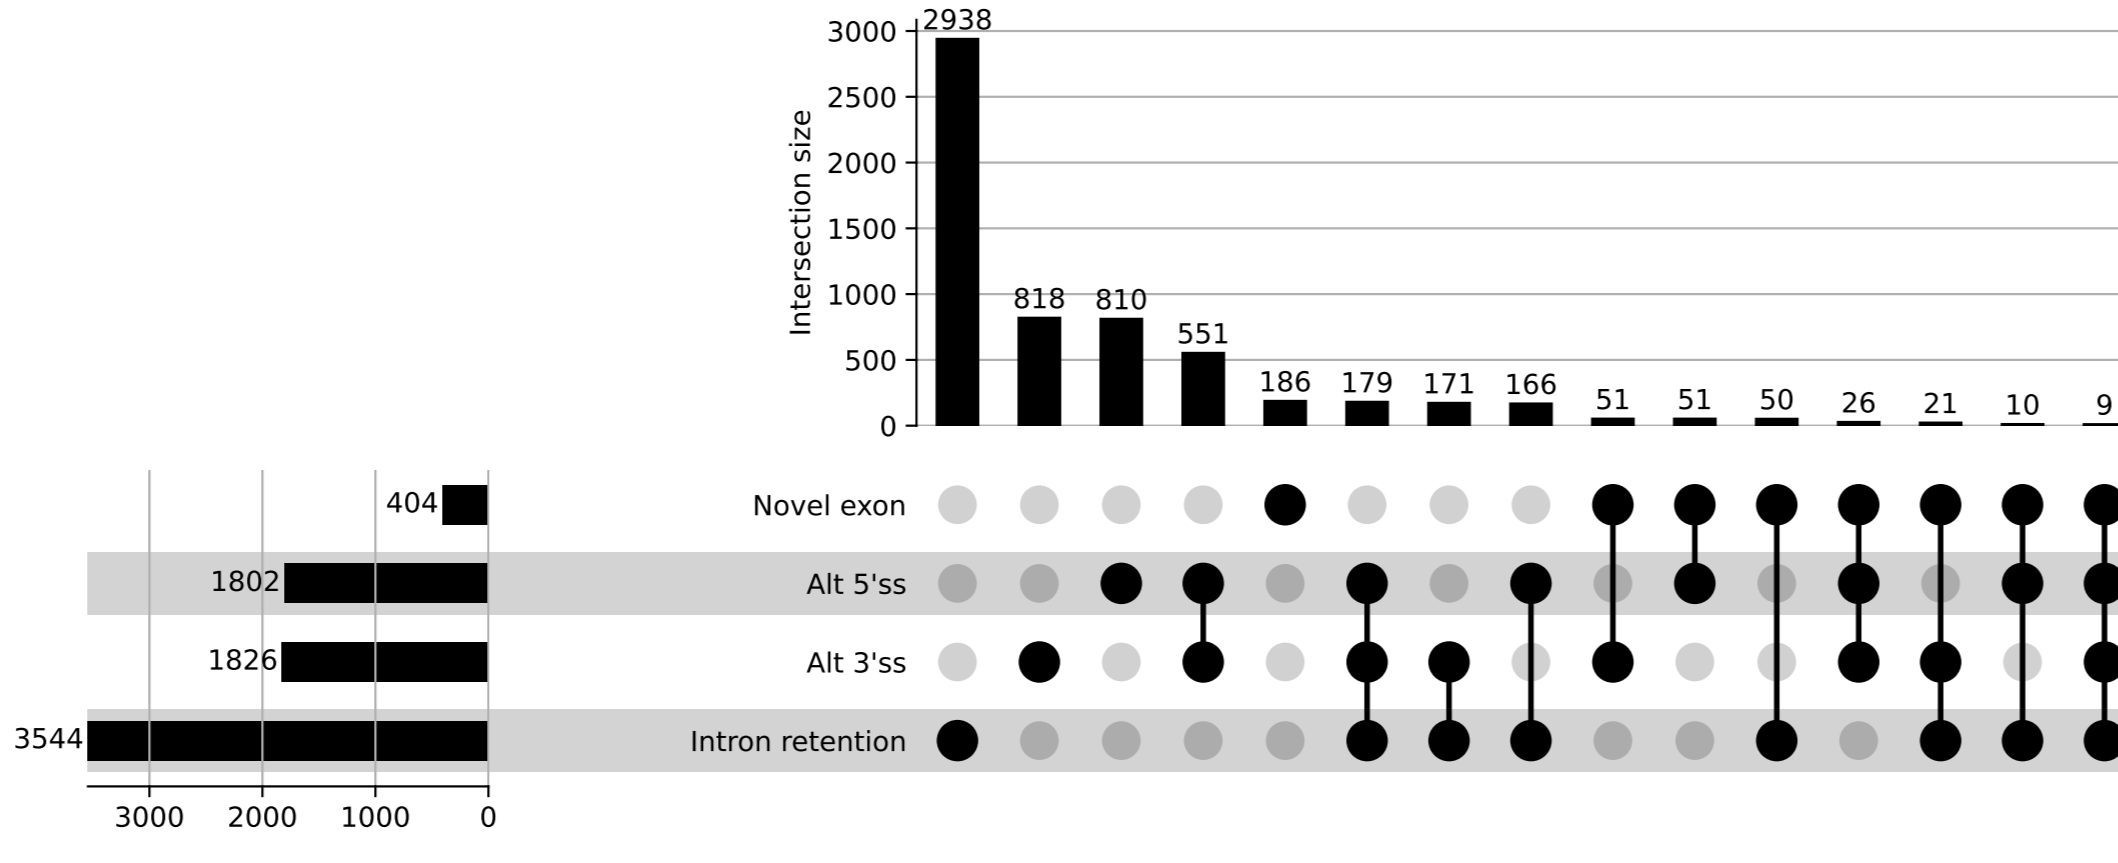

ESPRESSO PacBio novel splice site

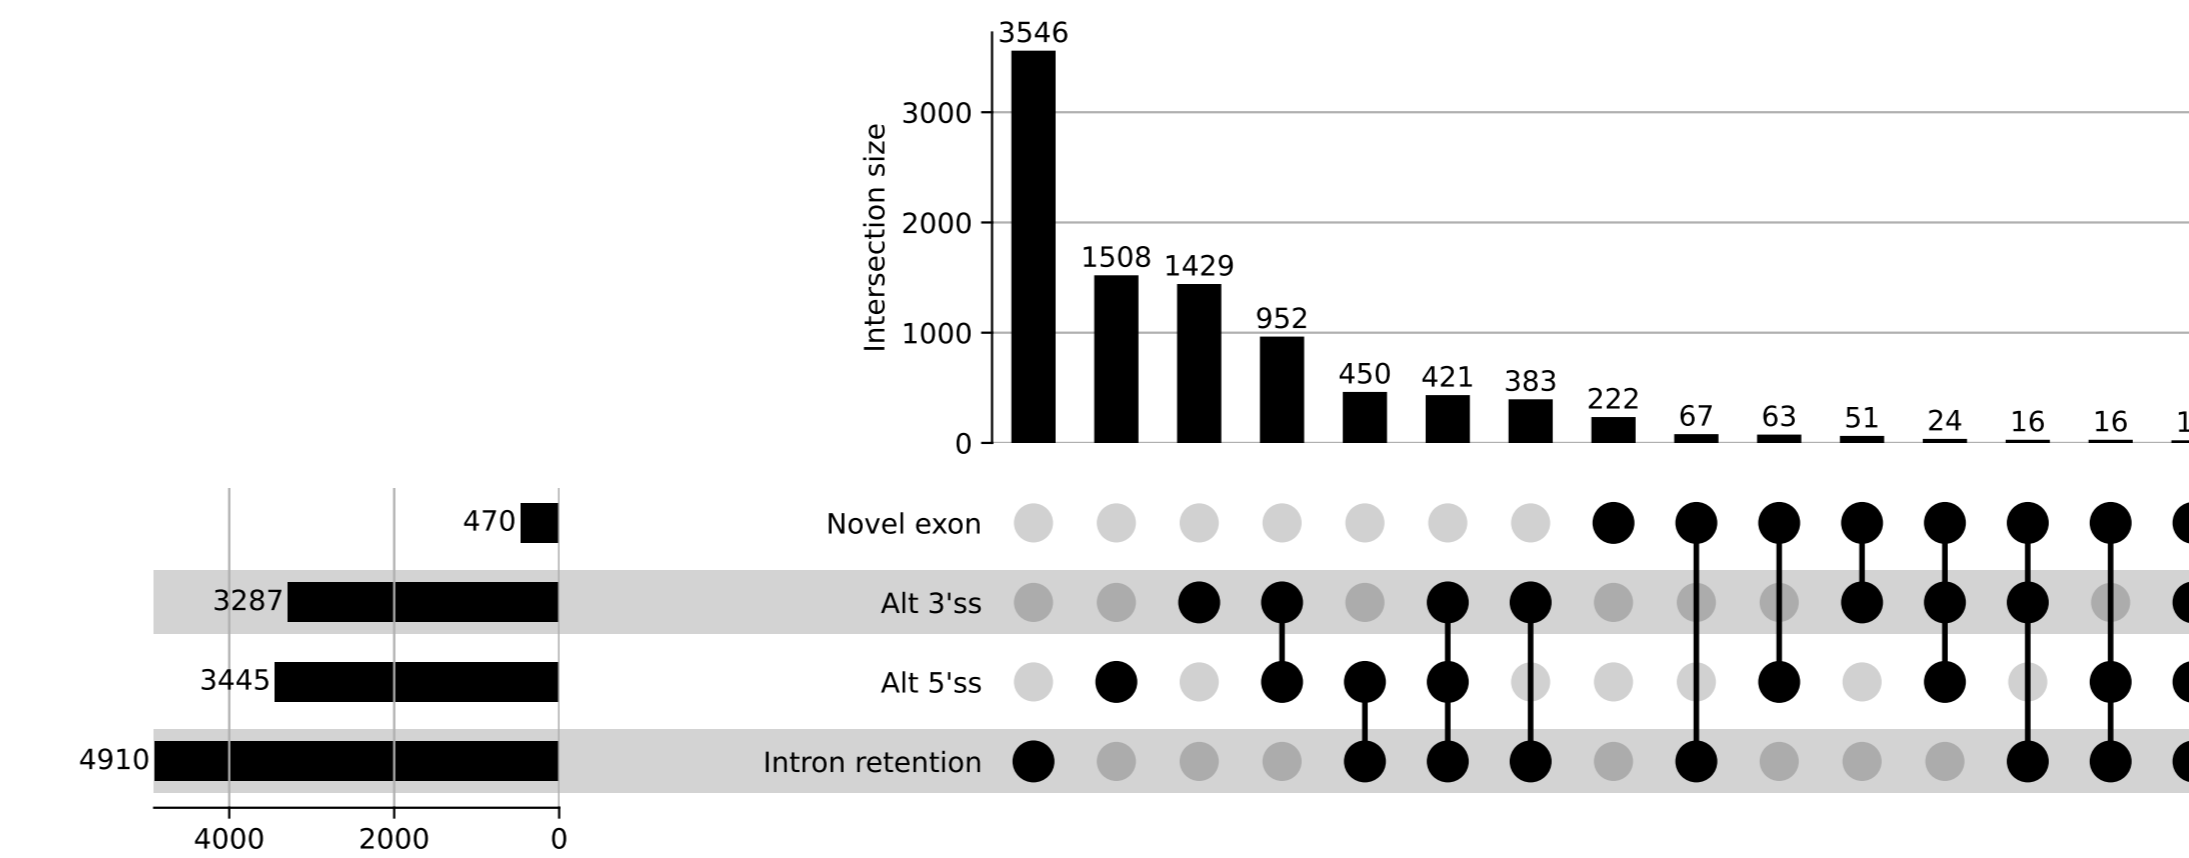

Bambu PacBio novel splice site

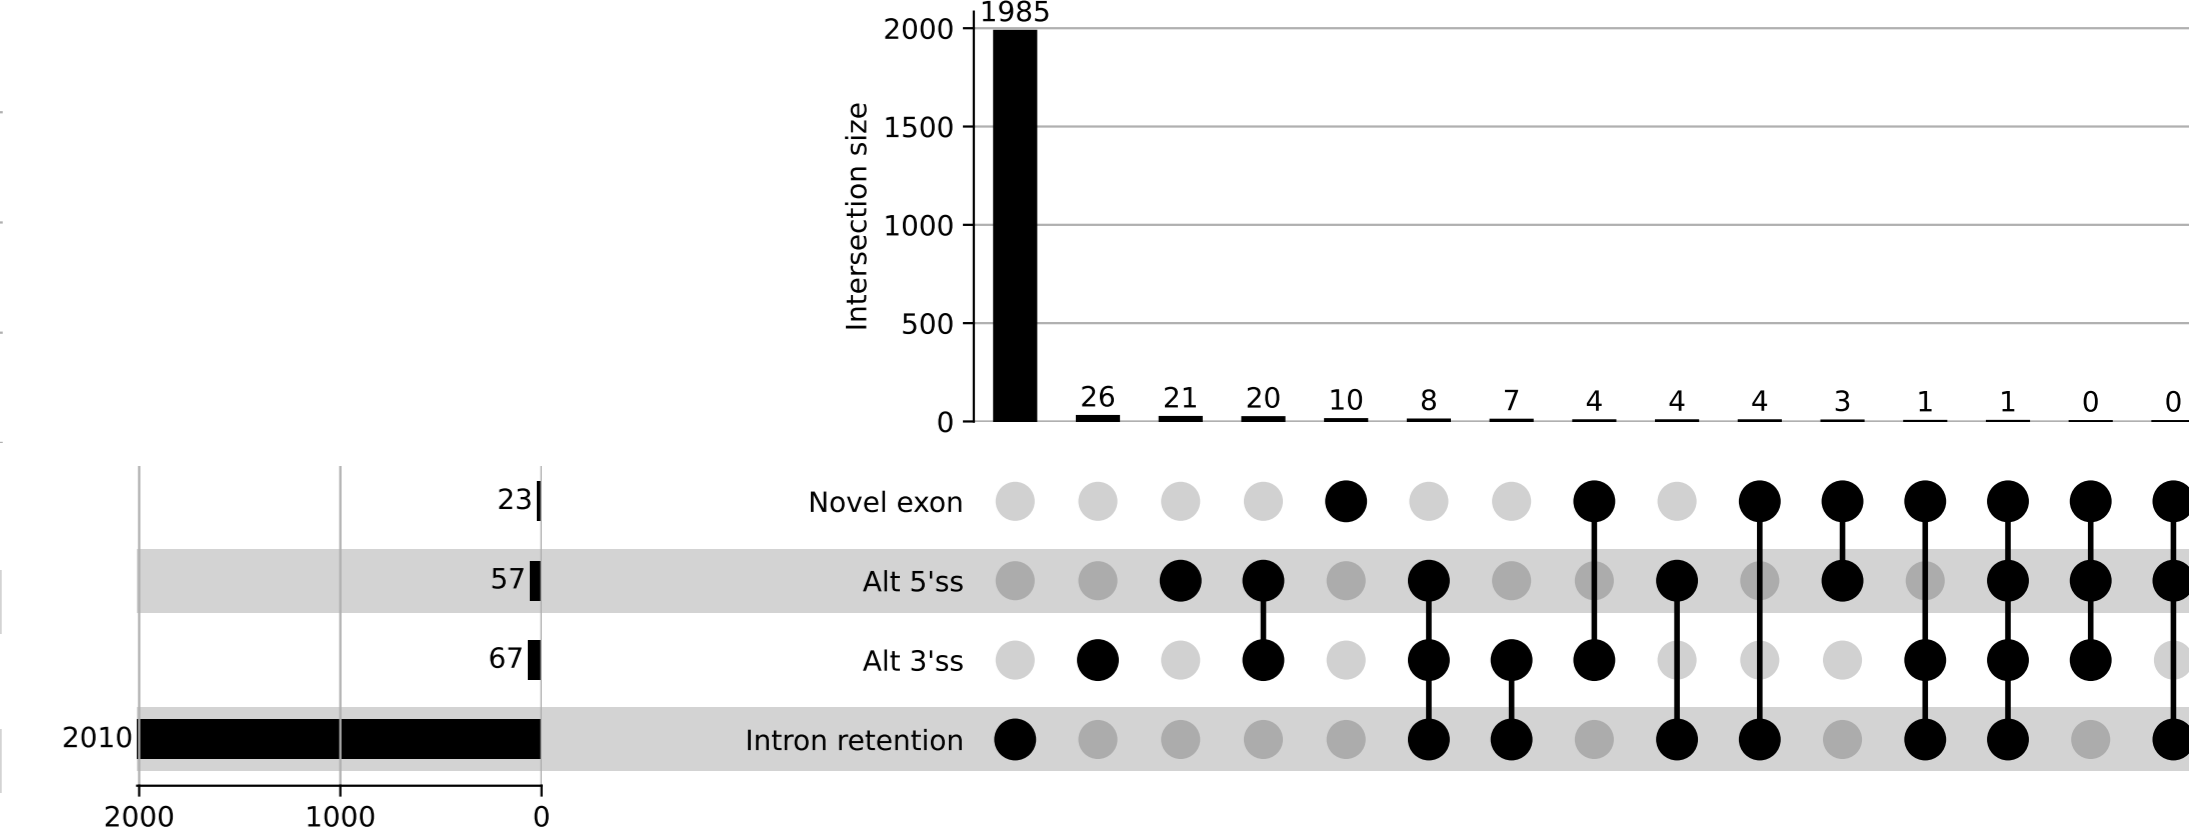

FLAIR ONT novel splice site

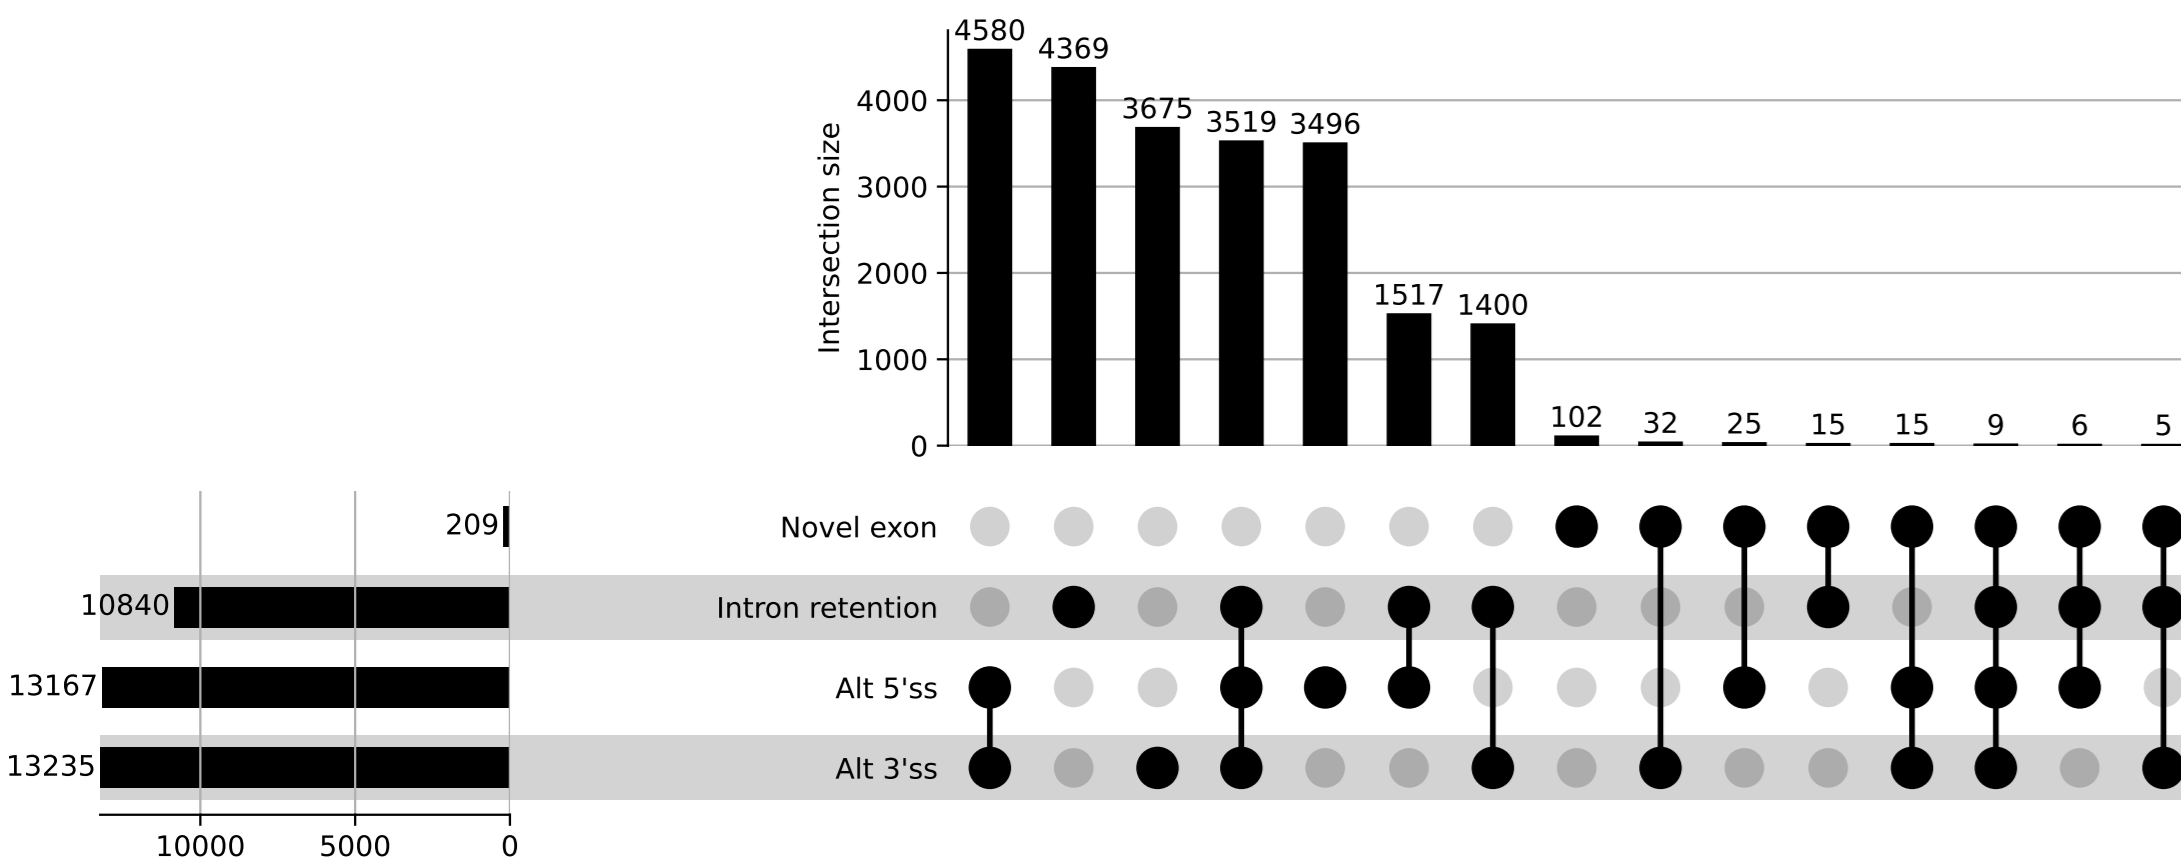

IsoQuant ONT novel splice site

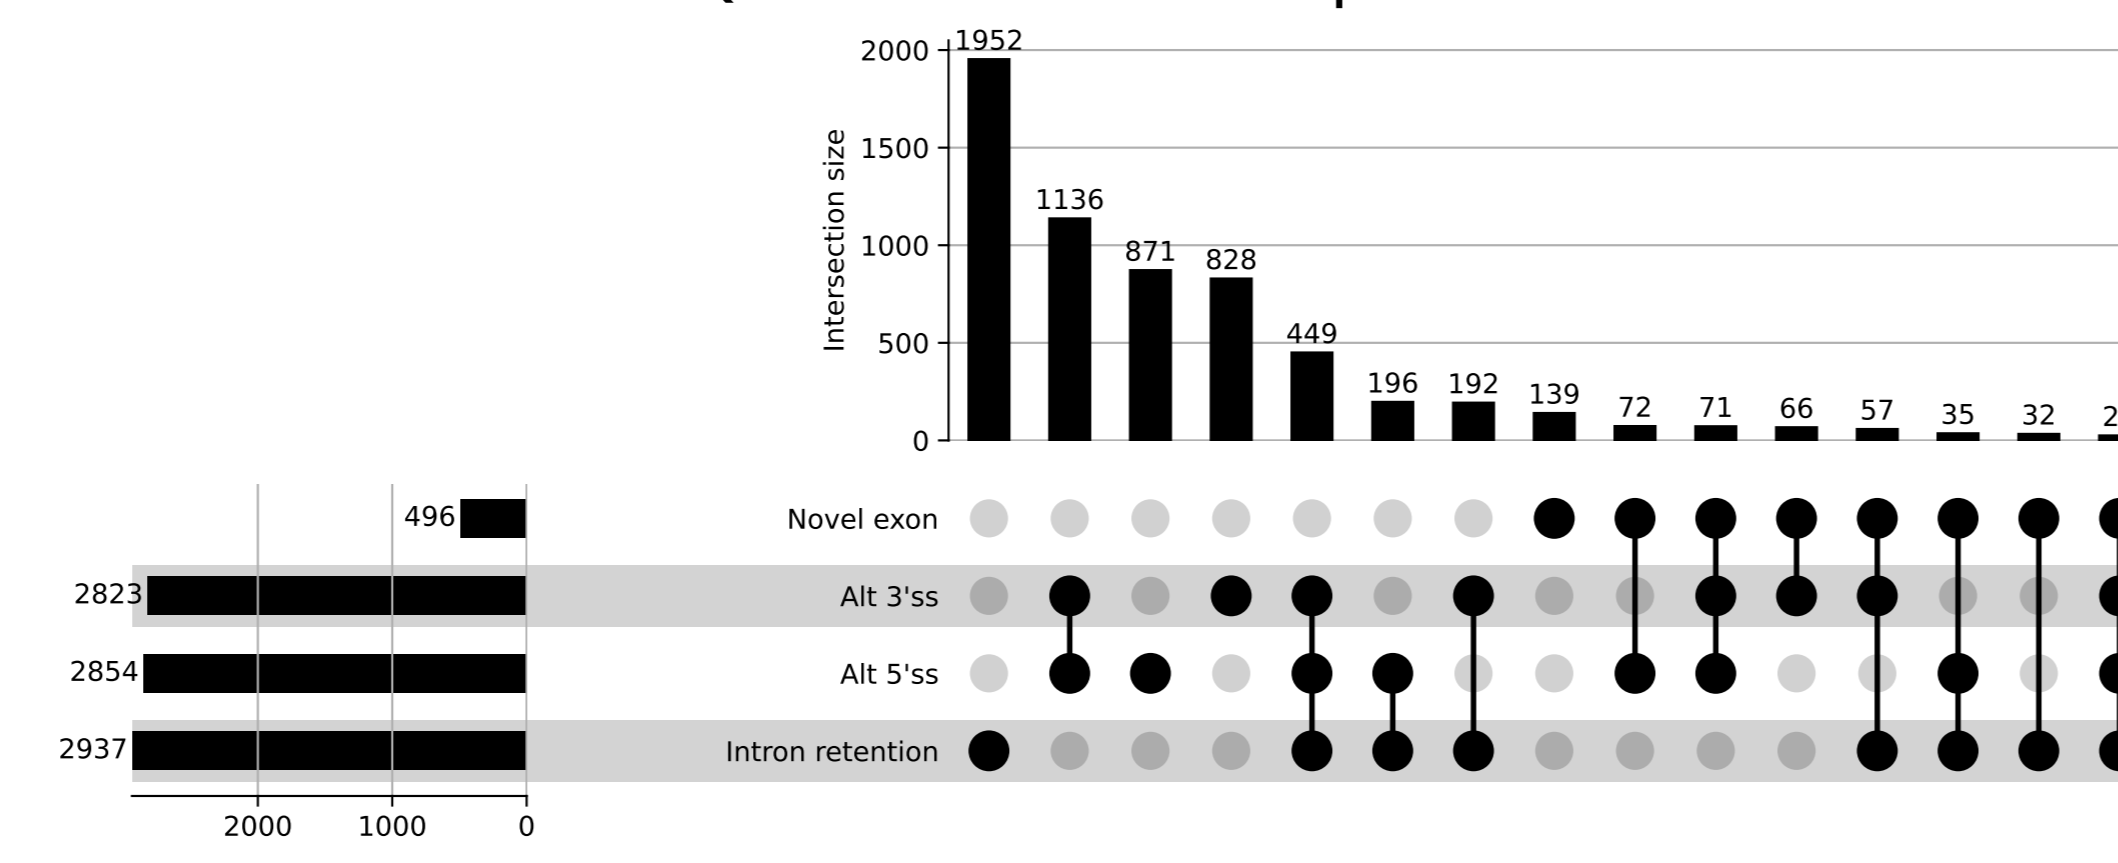

ESPRESSO ONT novel splice site

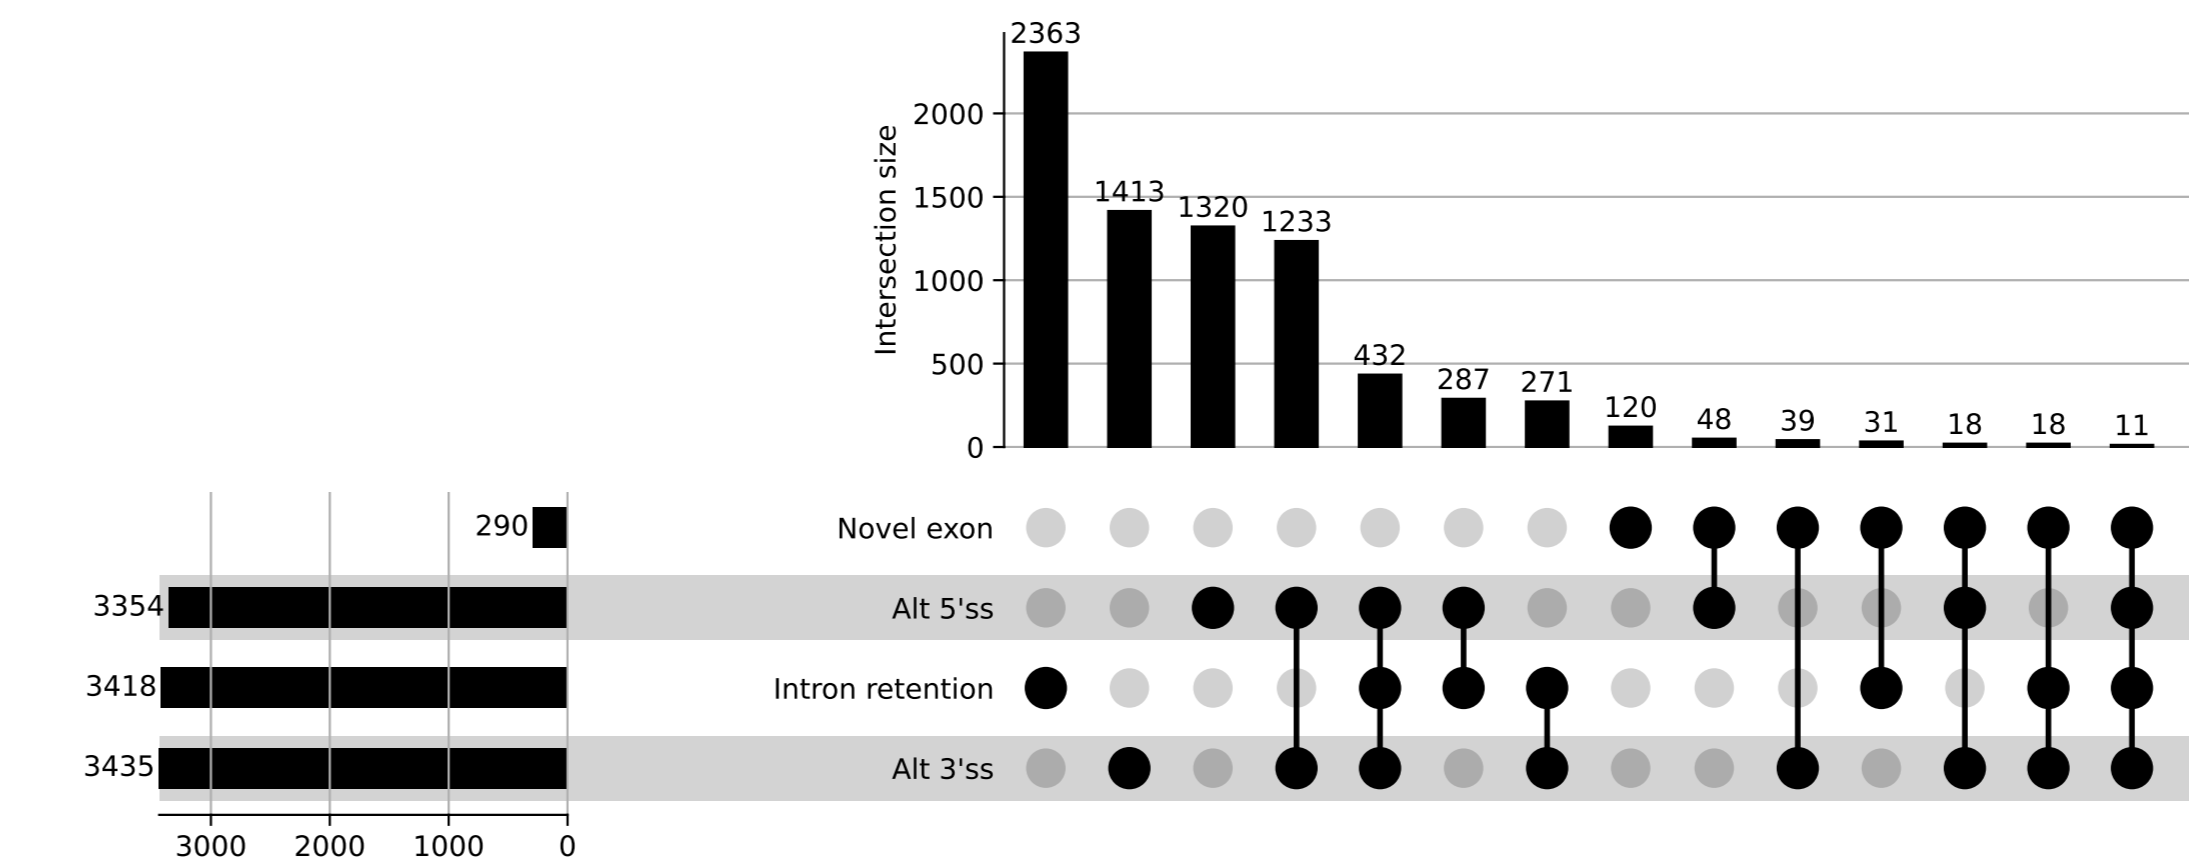

Bambu ONT novel splice site

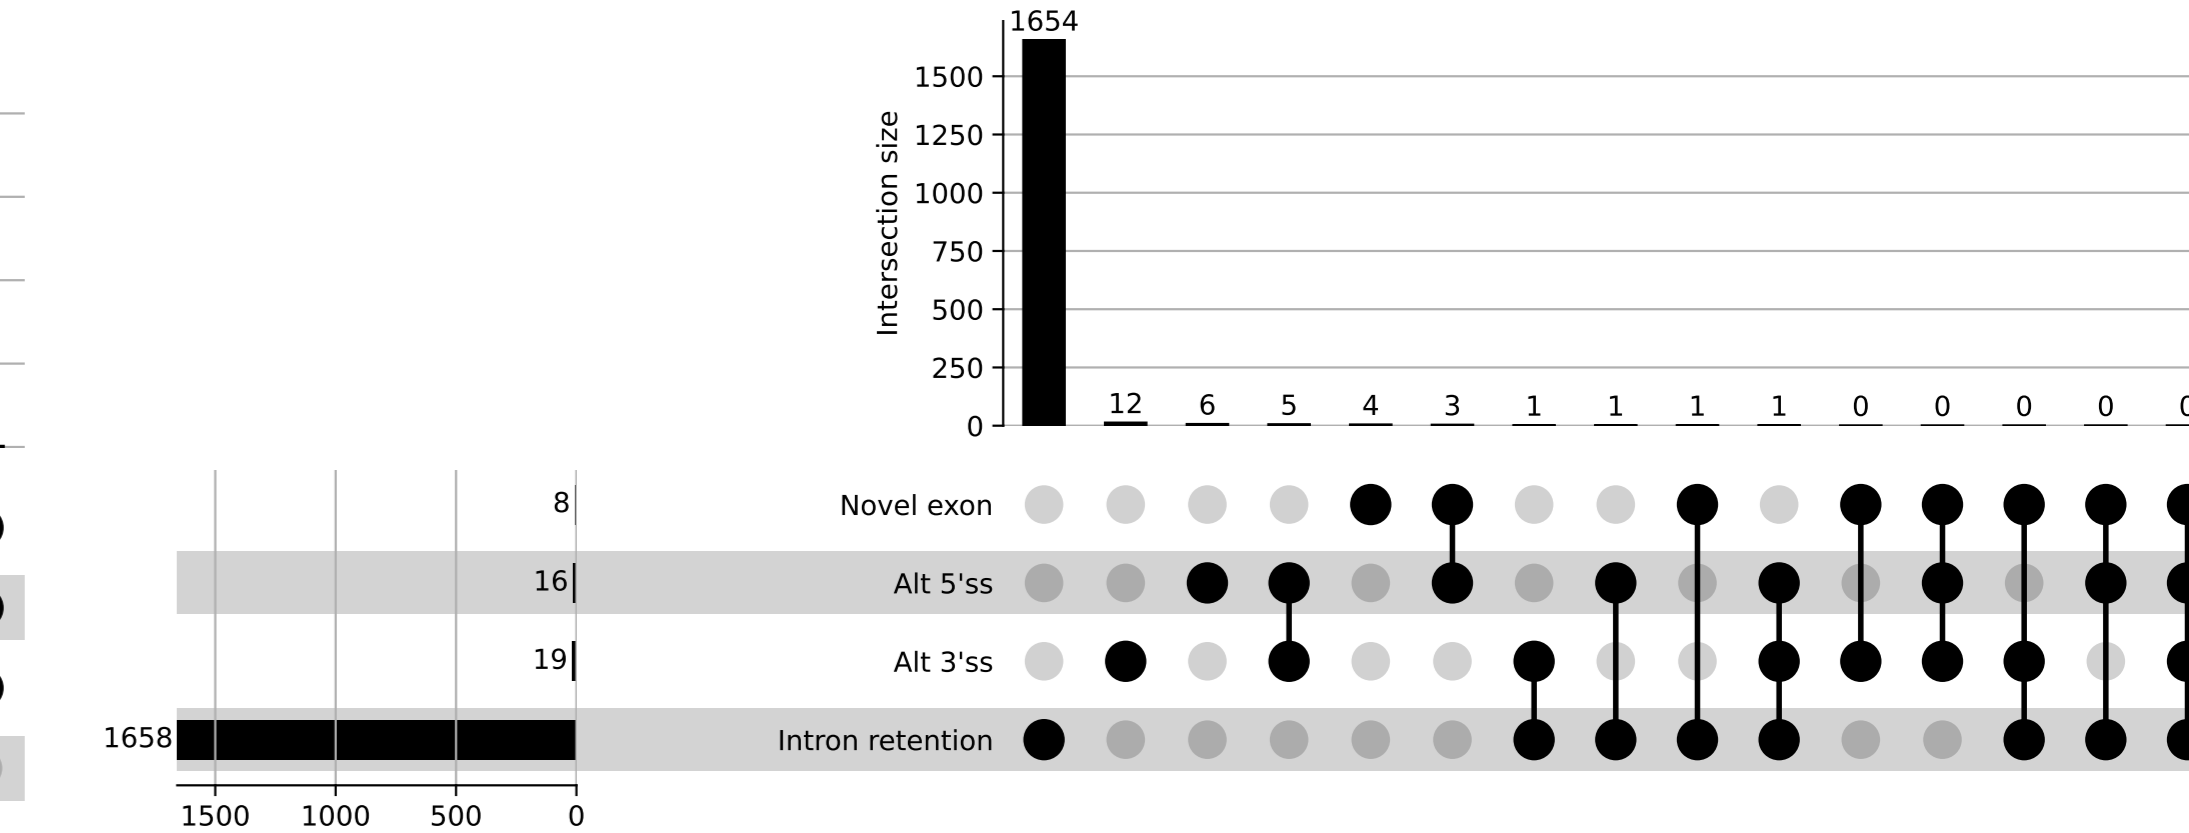

Supplement: Supplemental_code.zip [file Supplemental_Fig_S4.pdf › Supplemental_code/figures/Supplemental_Fig_S4/Supplemental_Fig_S4.pdf]
