# Supplementary material for: Contrasting and combining transcriptome complexity captured by short and long RNA sequencing reads
Source: HighWire-hosted journal article supplement (doi:10.1101/gr.278659.123), 2024-09-25

A

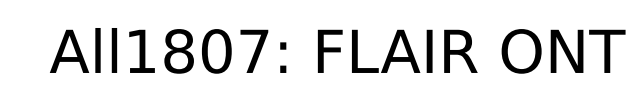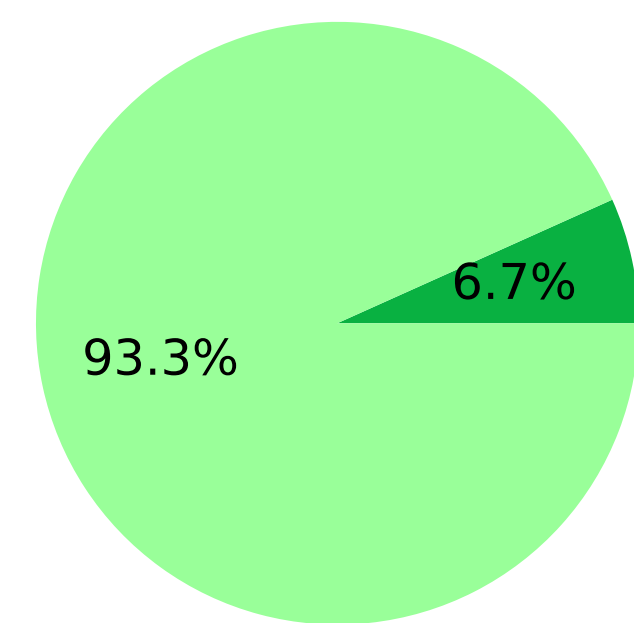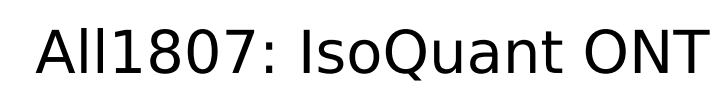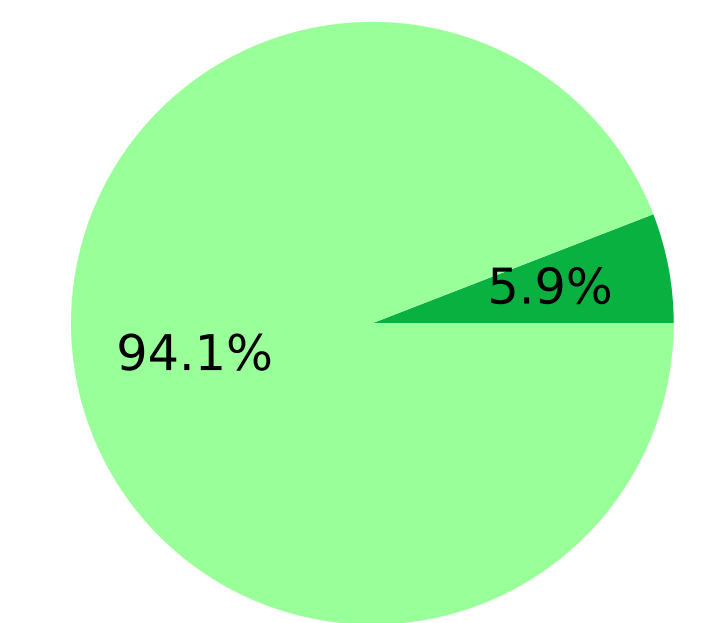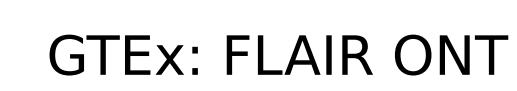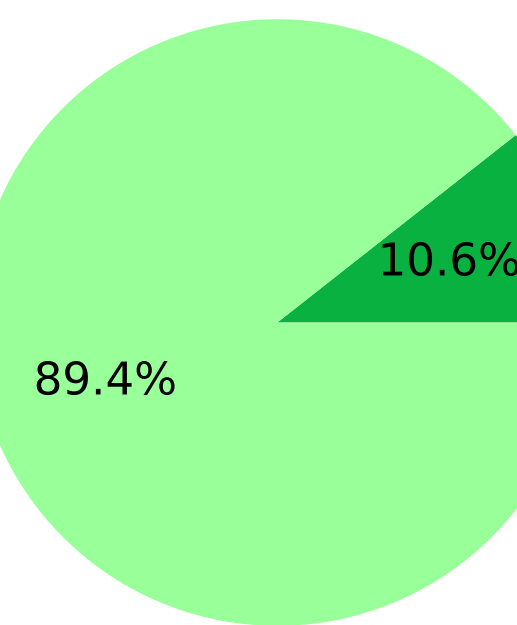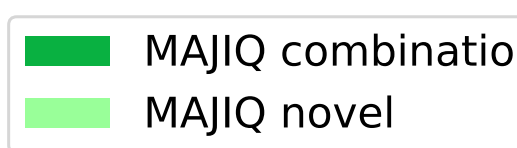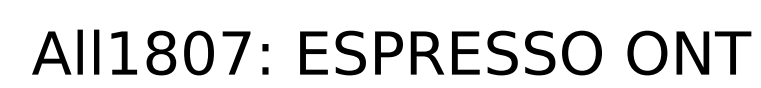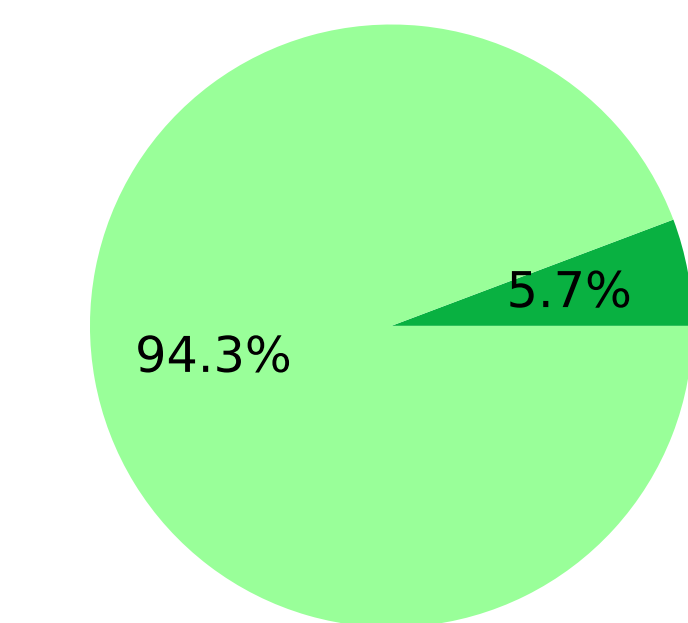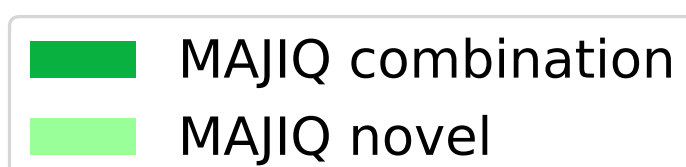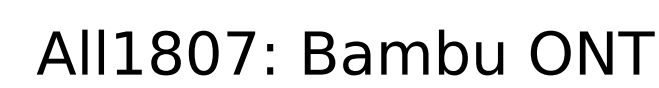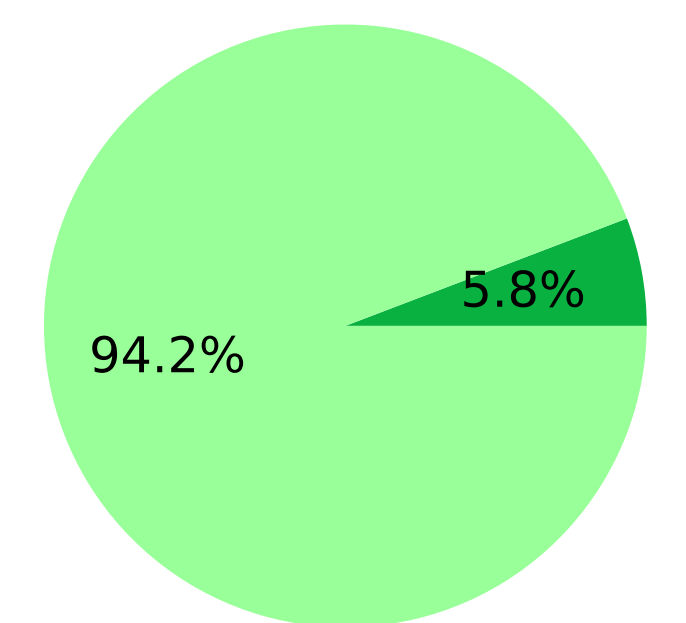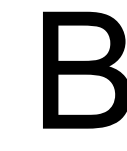

ALL1807: FLAIR ONT de novo junction

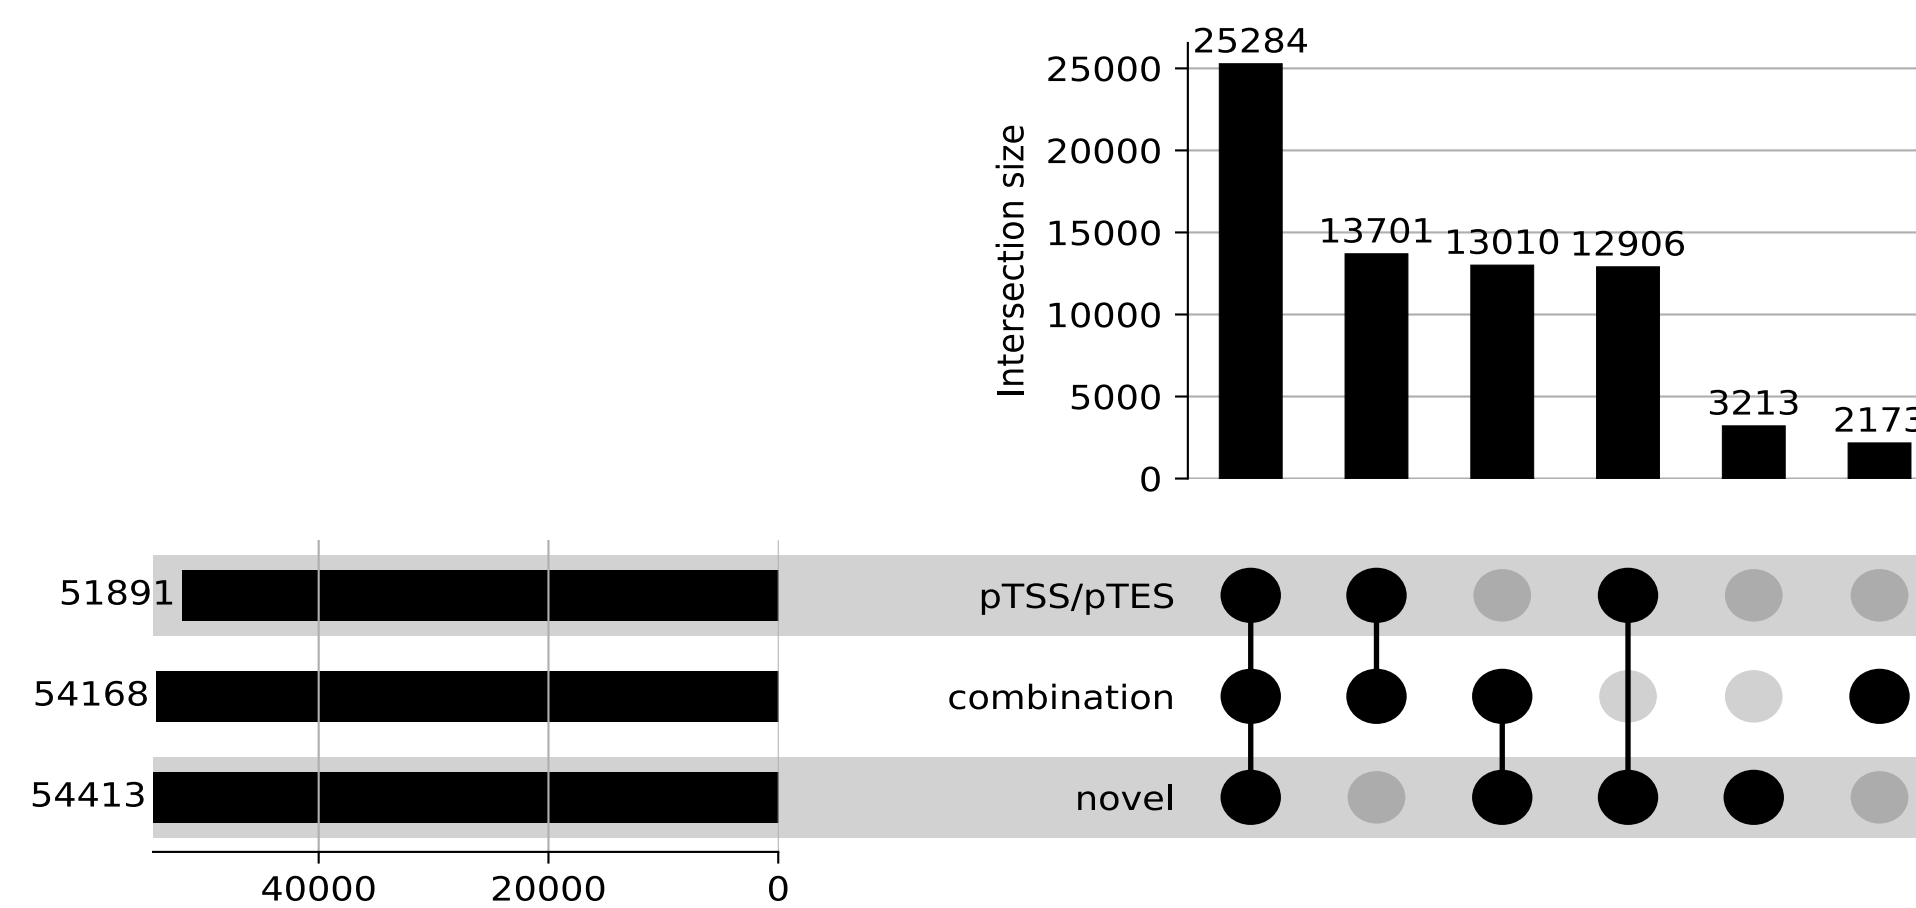

ALL1807: IsoQuant ONT de novo junction

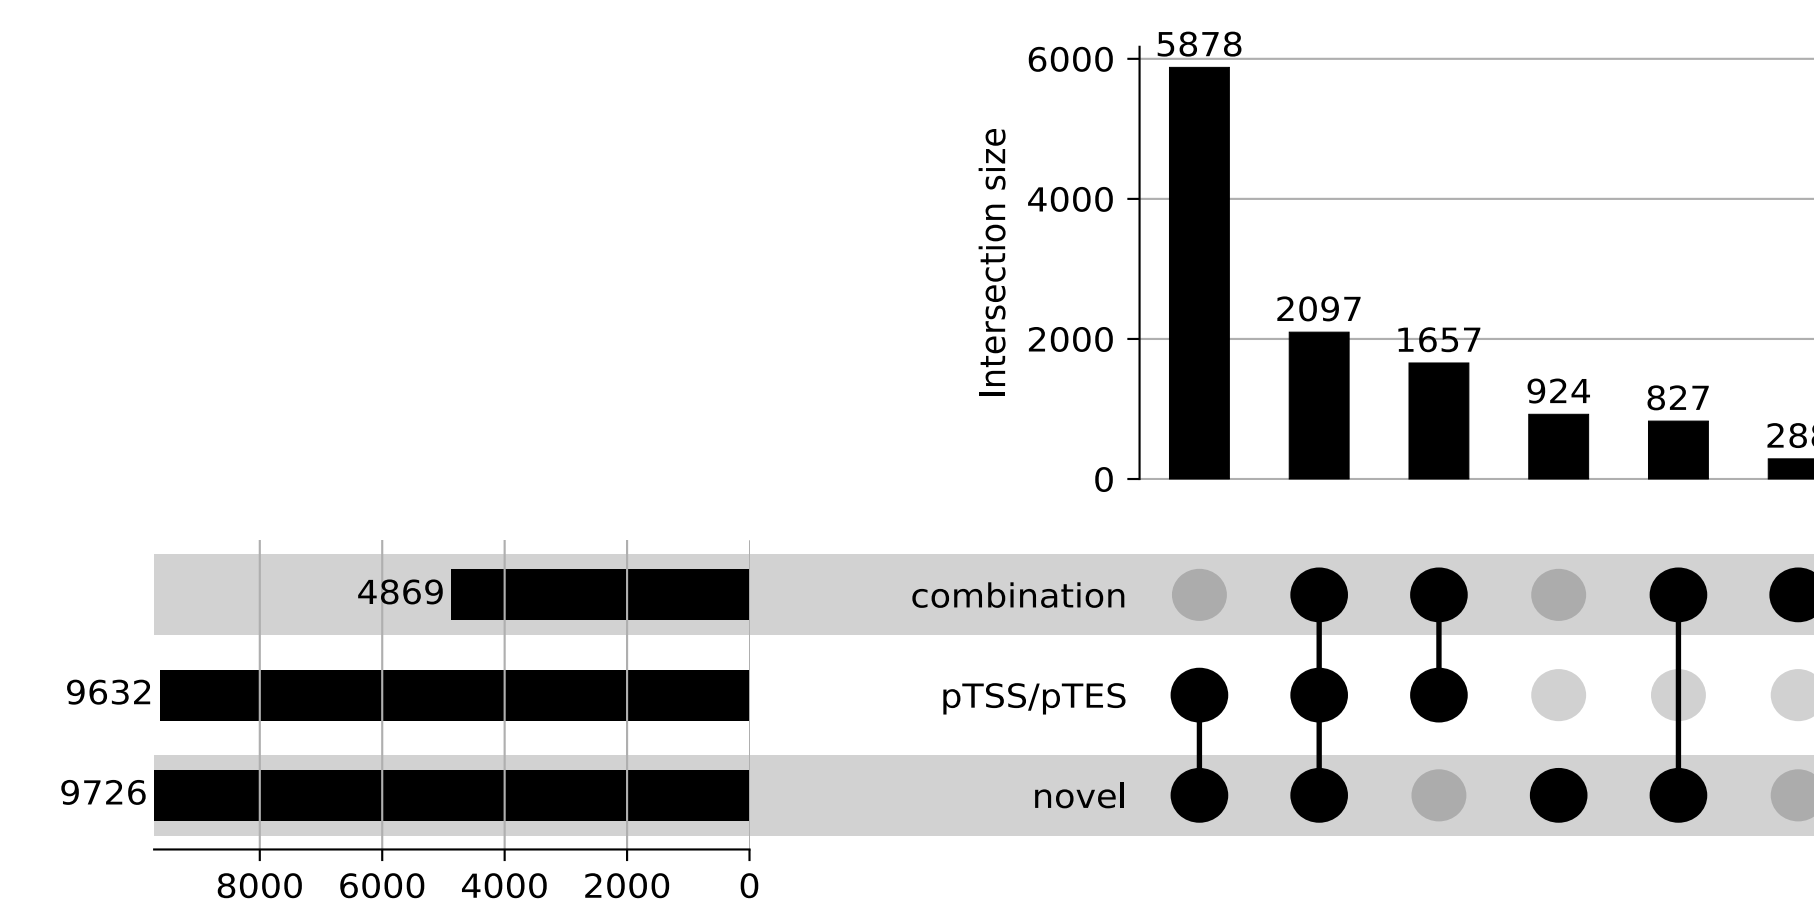

ALL1807: ESPRESSO ONT de novo junction

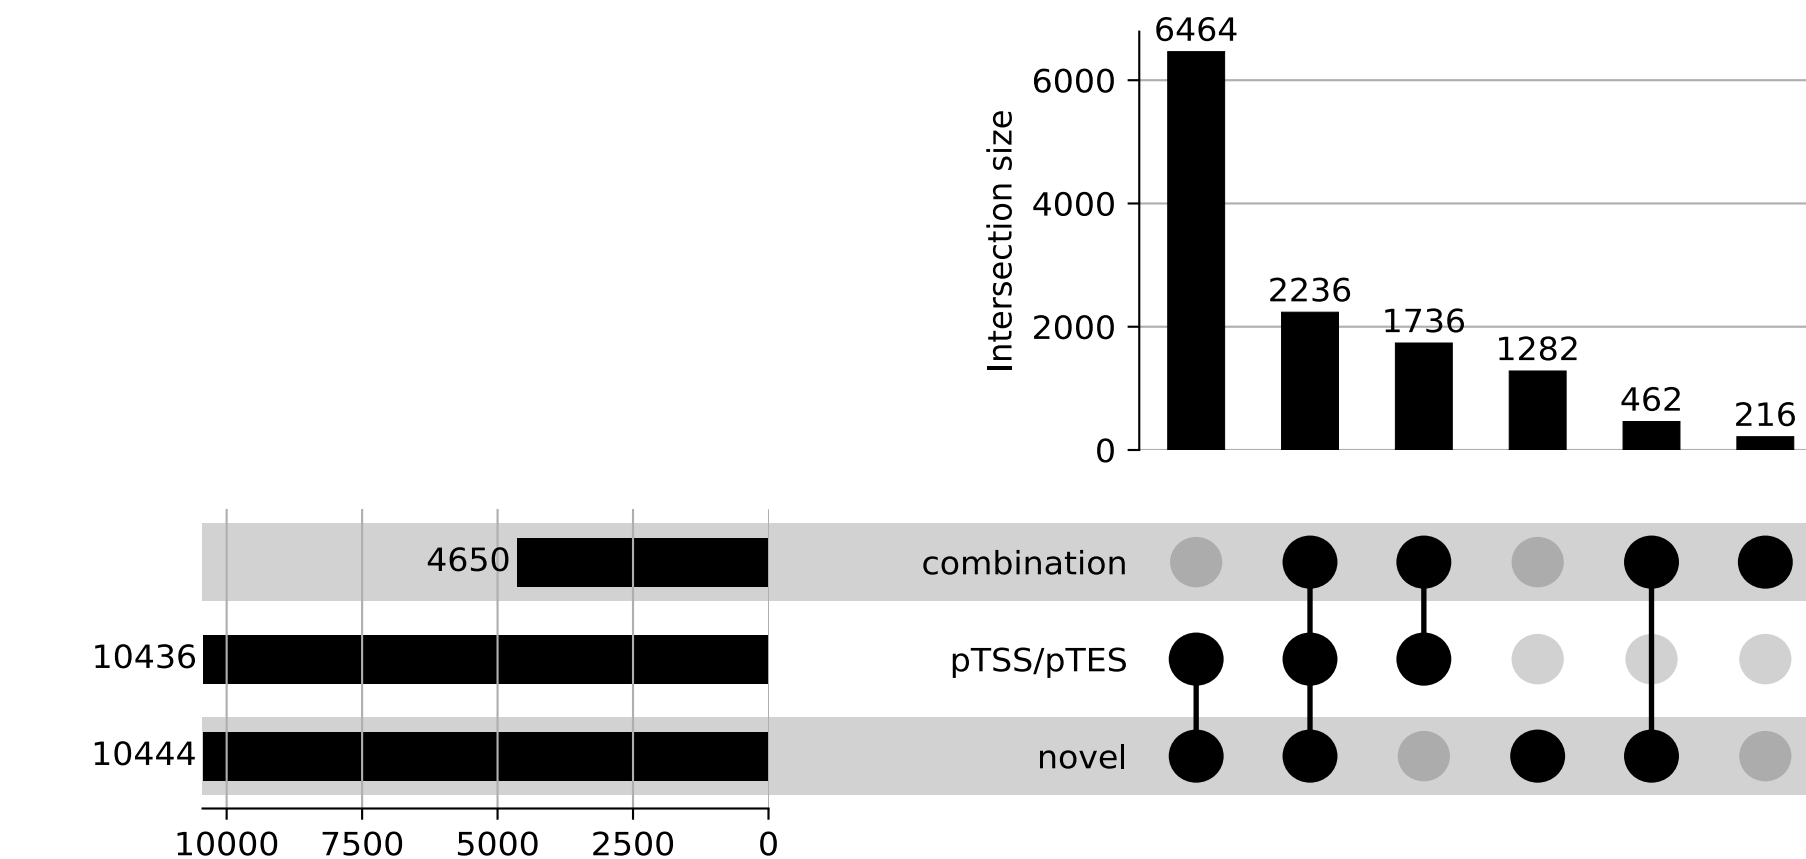

GTEx Heart atrial appendage  
FLAIR ONT de novo junction

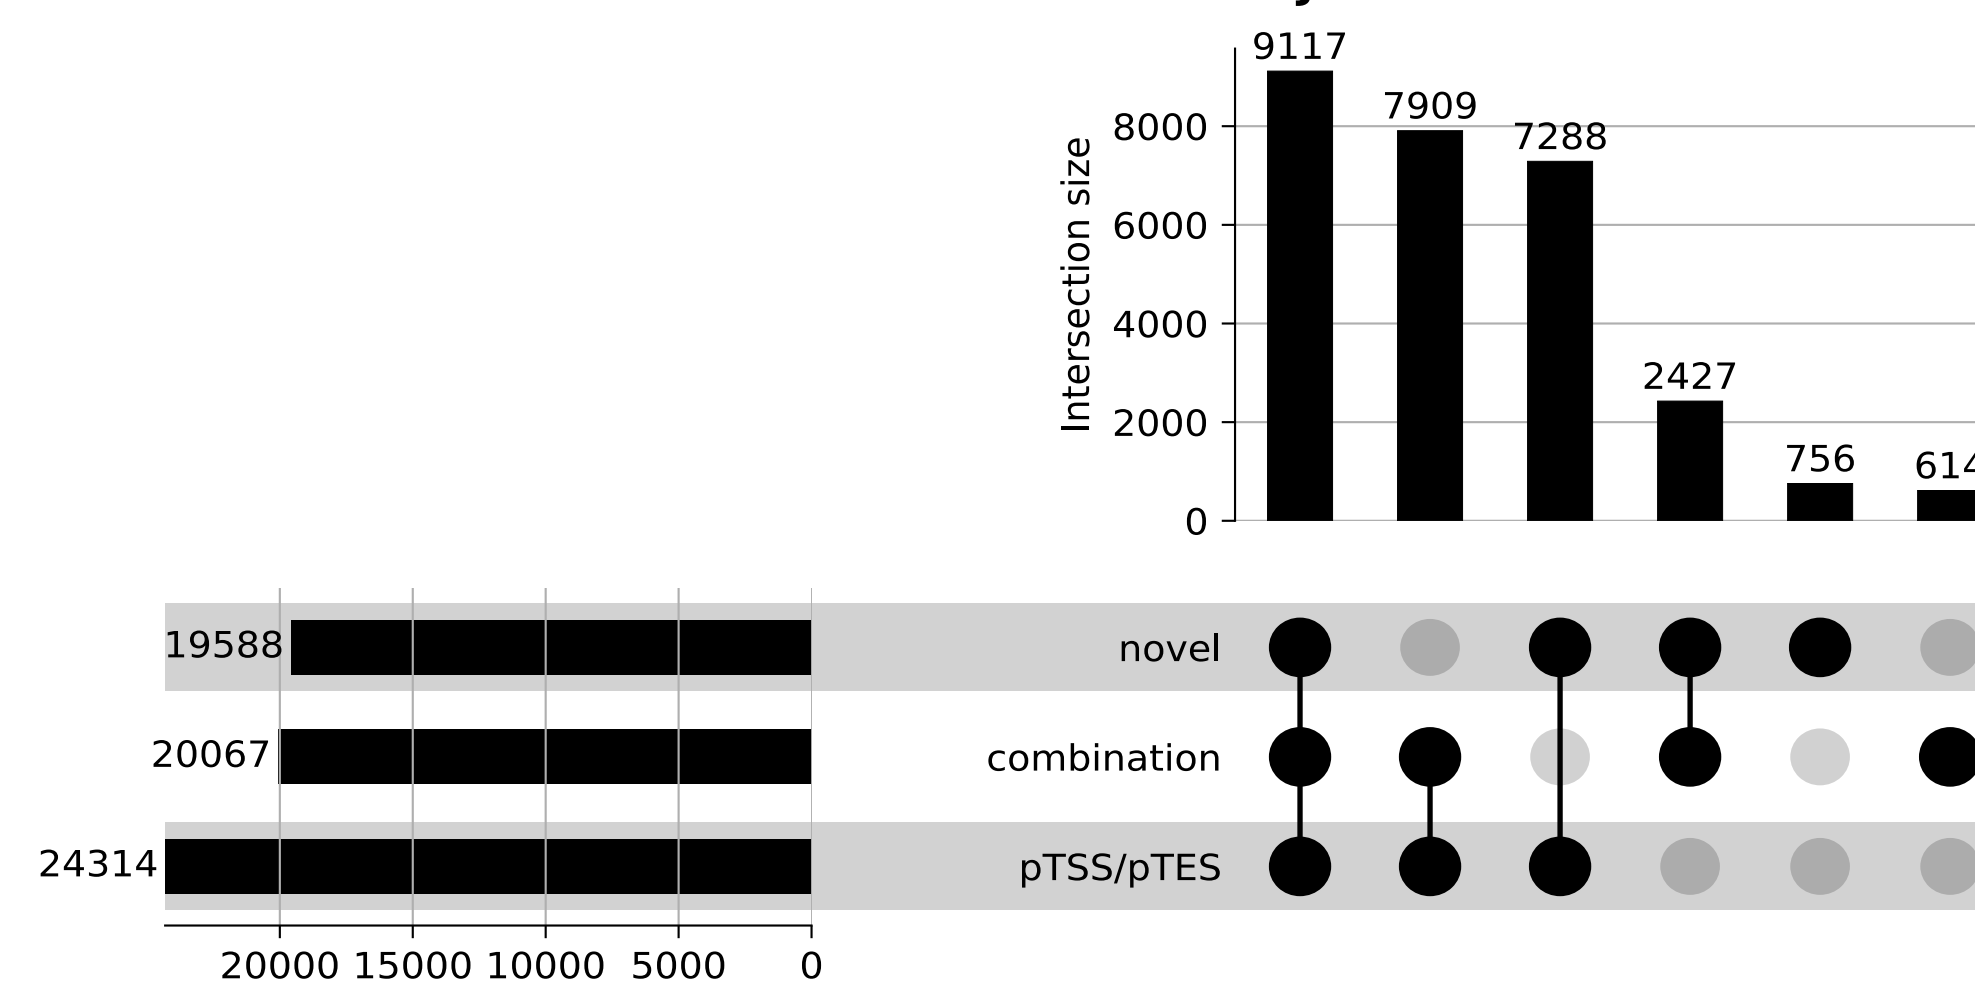

ALL1807: Bambu ONT de novo junction

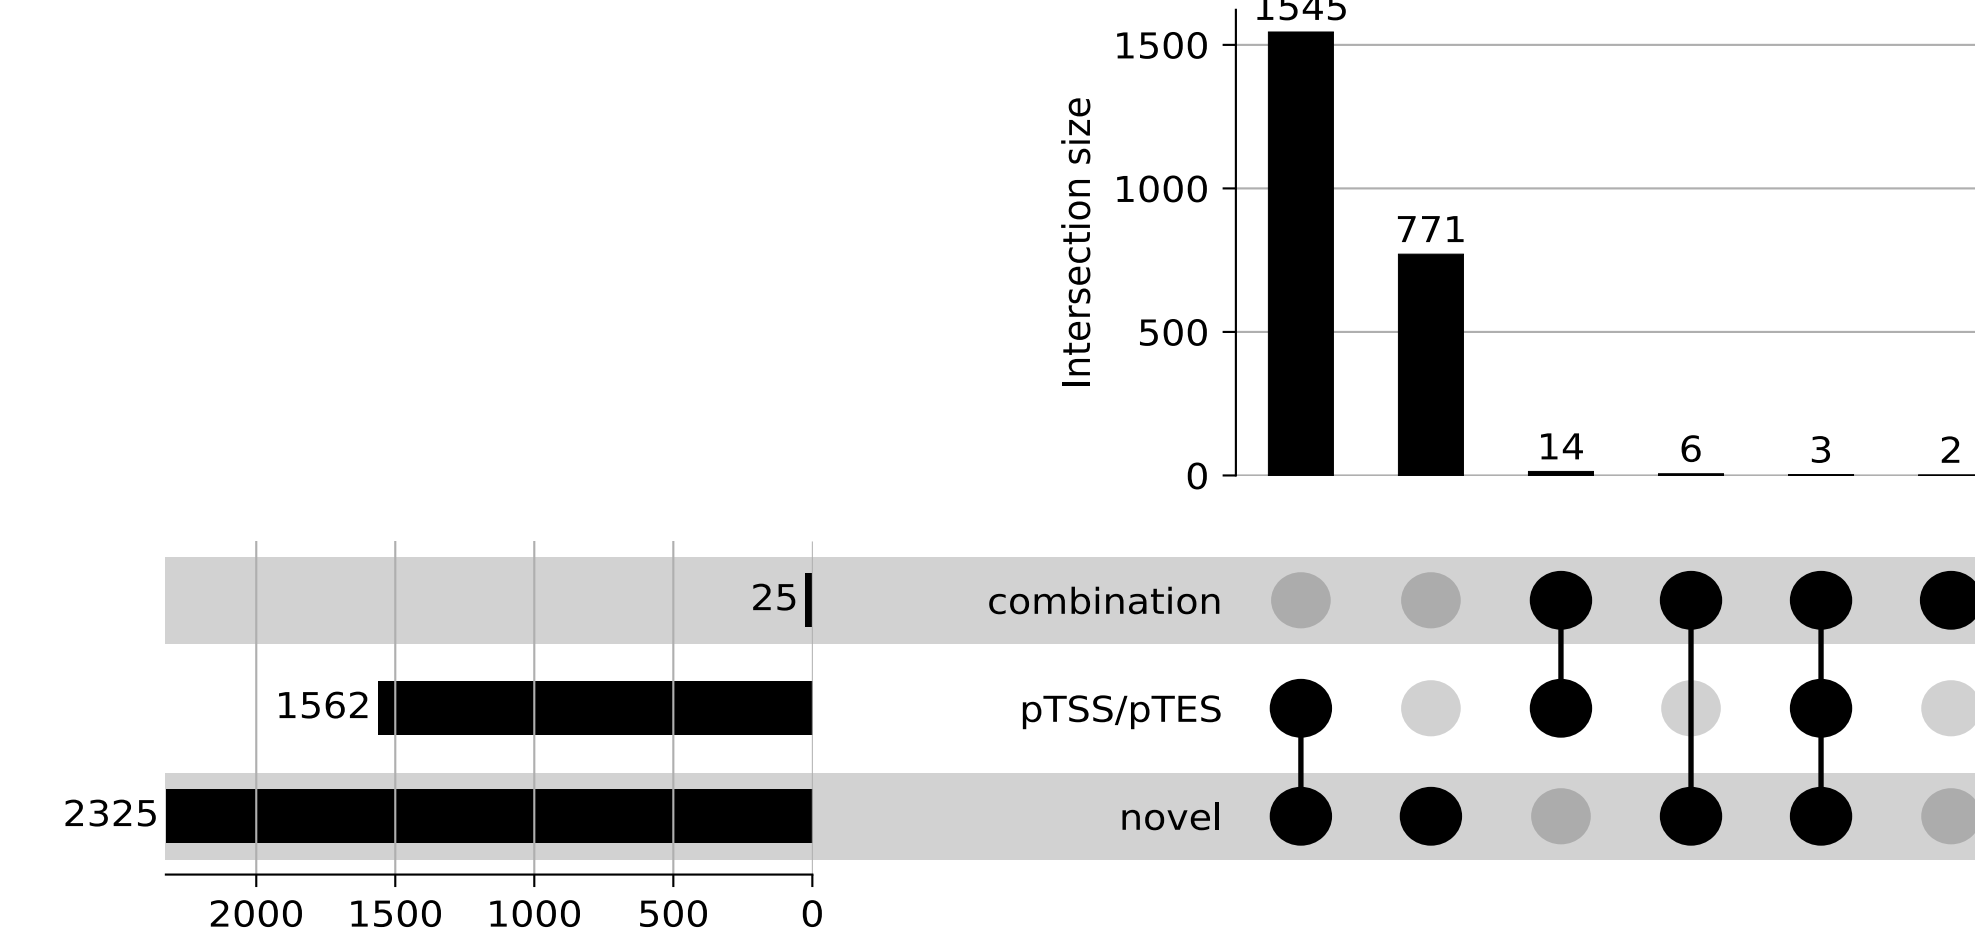

C

All1807: FLAIR ONT novel splice site

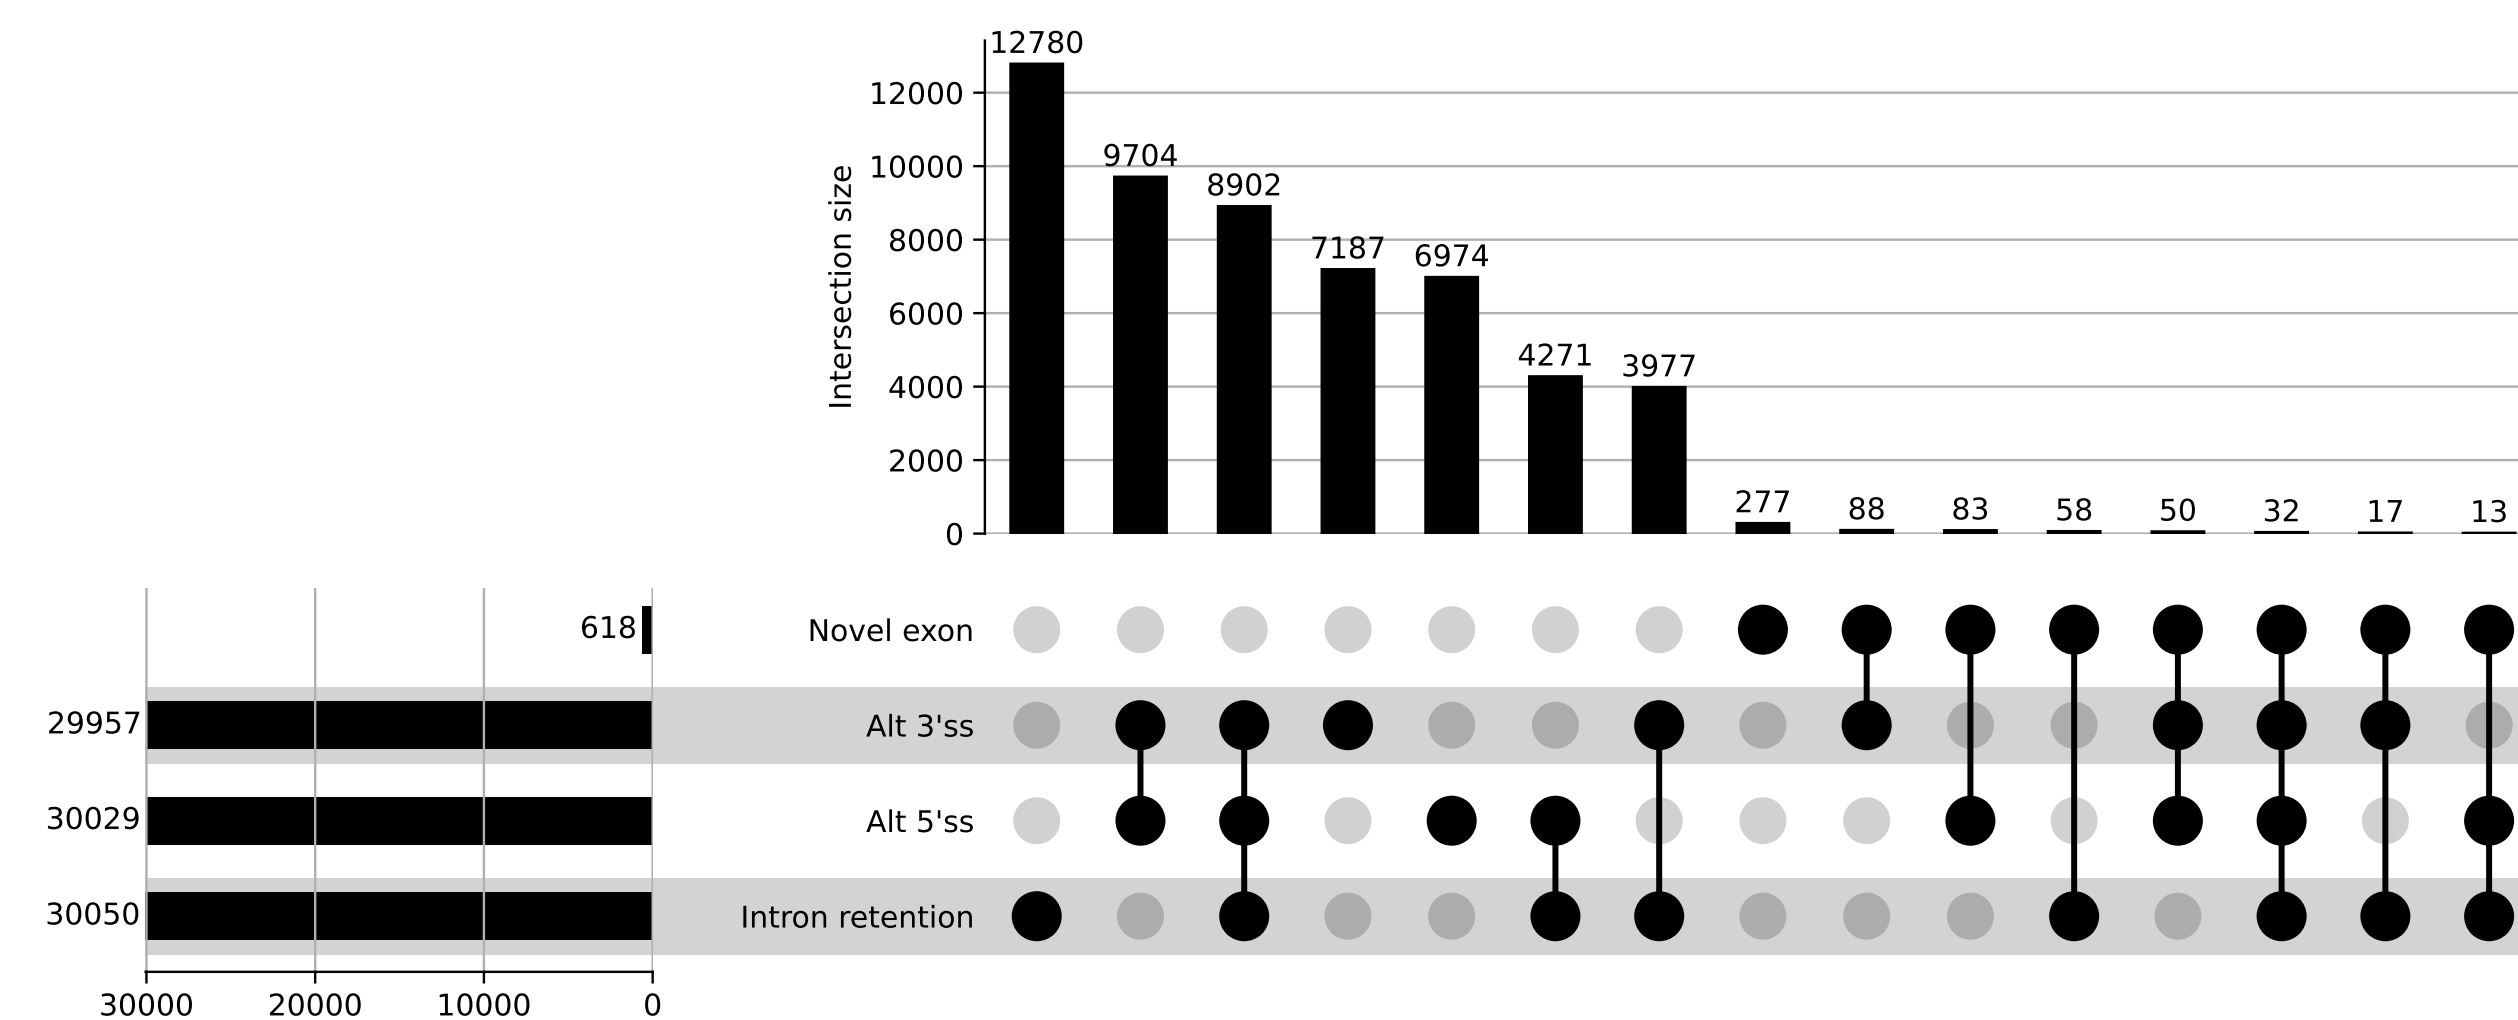

All1807: IsoQuant ONT novel splice site

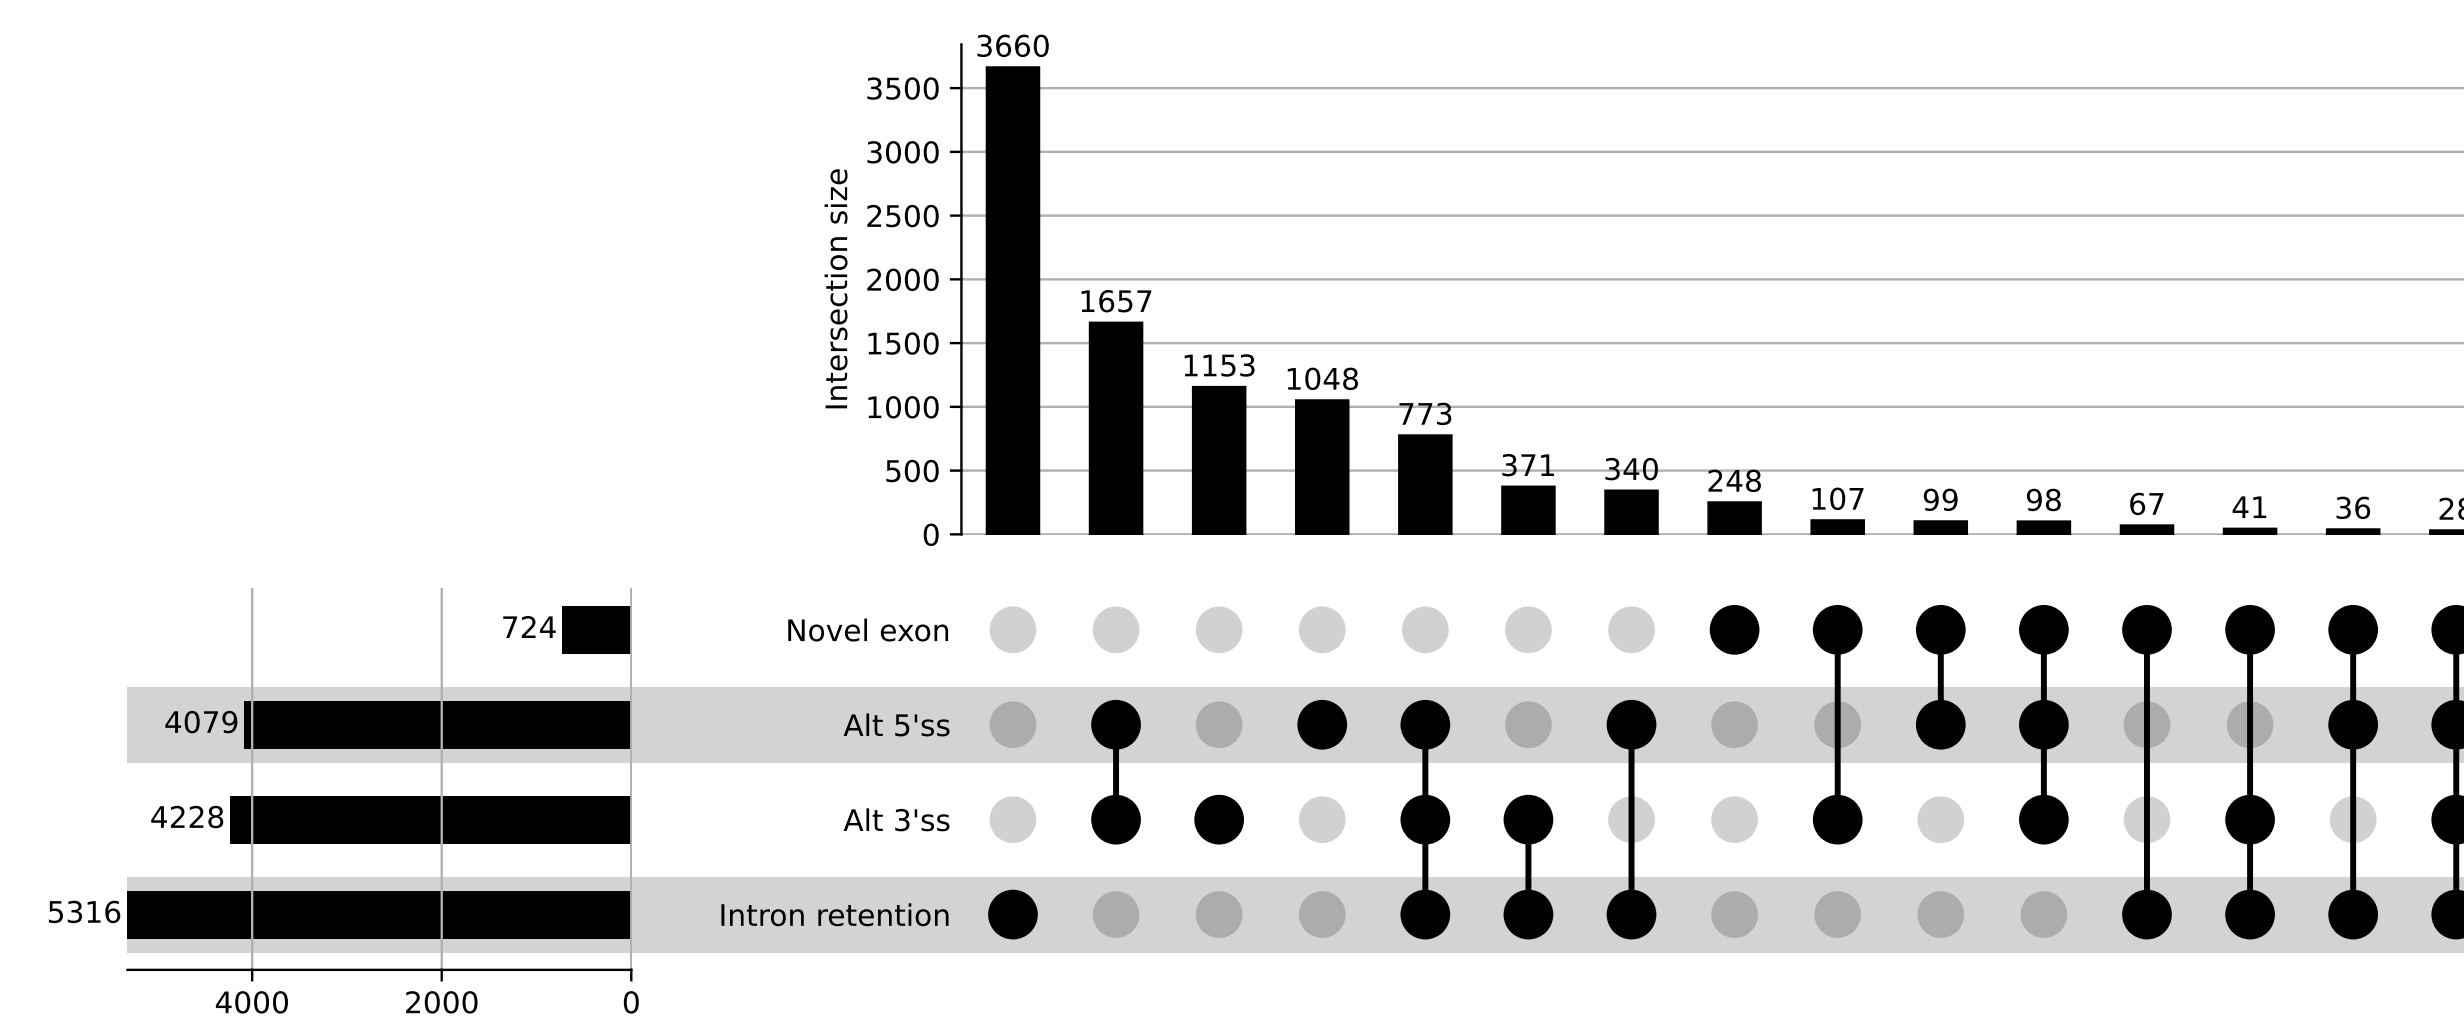

All1807: ESPRESSO ONT novel splice site

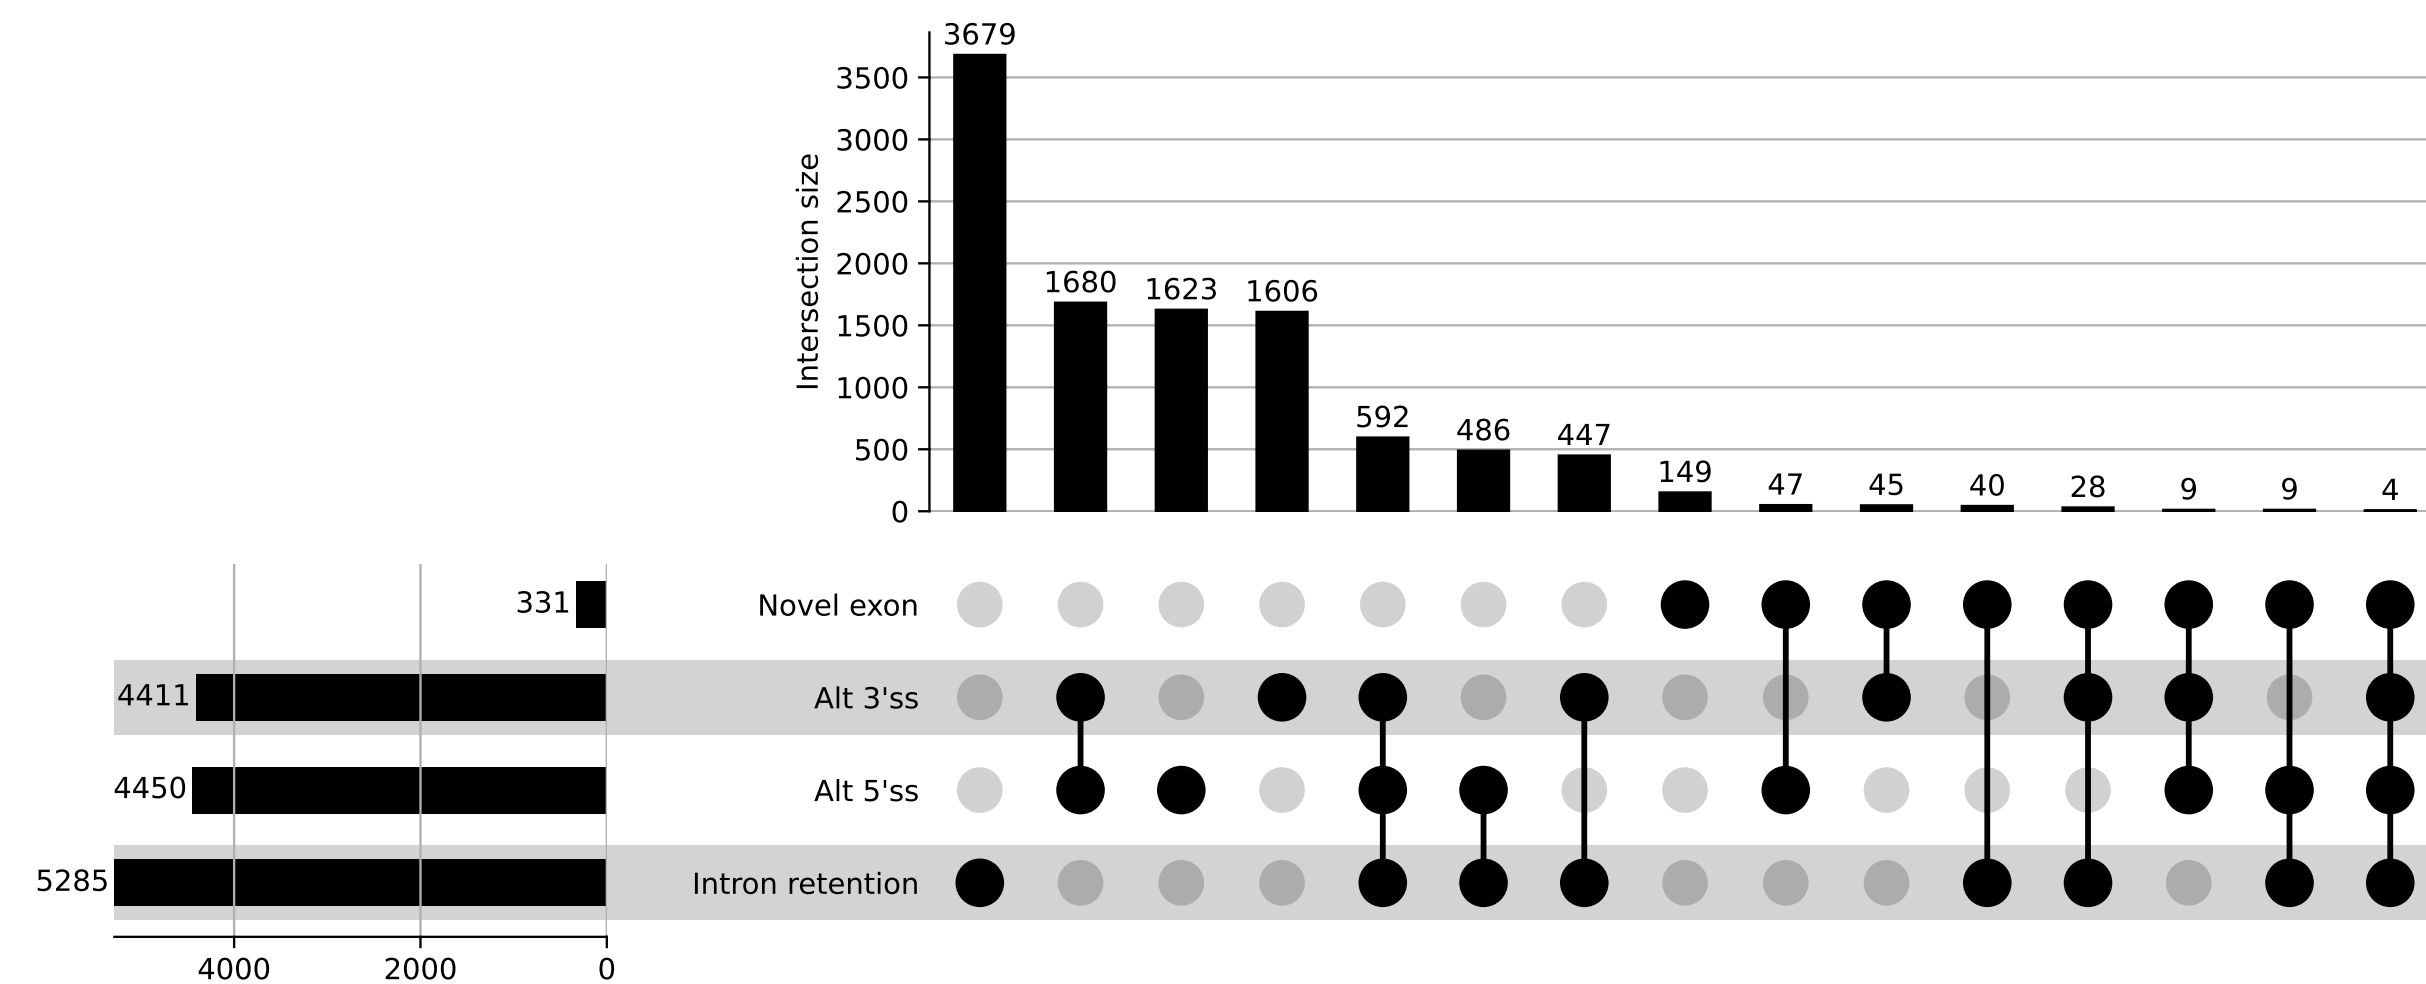

GTEx Heart atrial appendage  
FLAIR ONT novel splice site

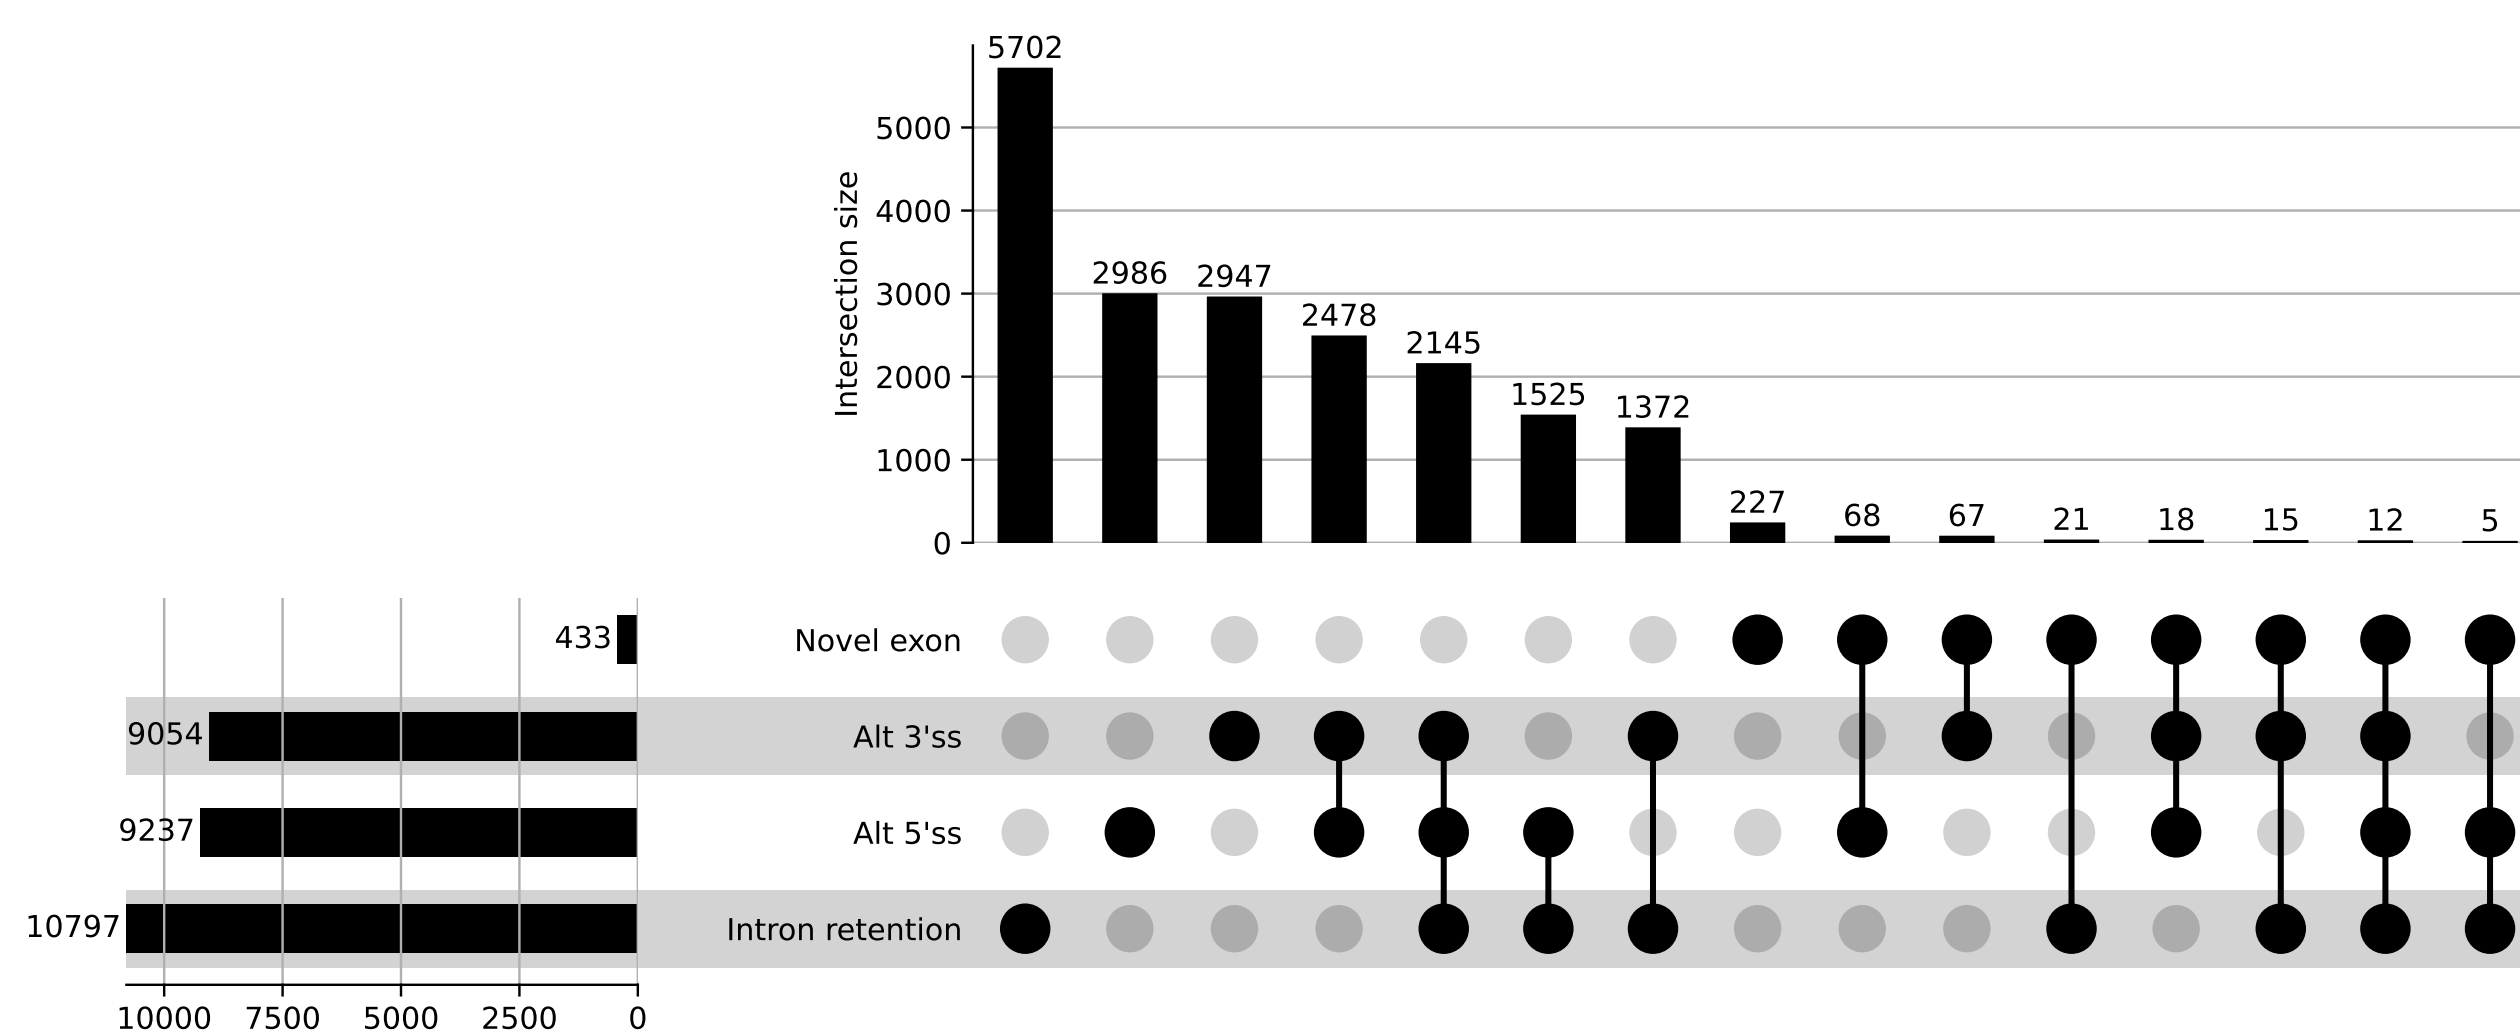

All1807: Bambu ONT novel splice site

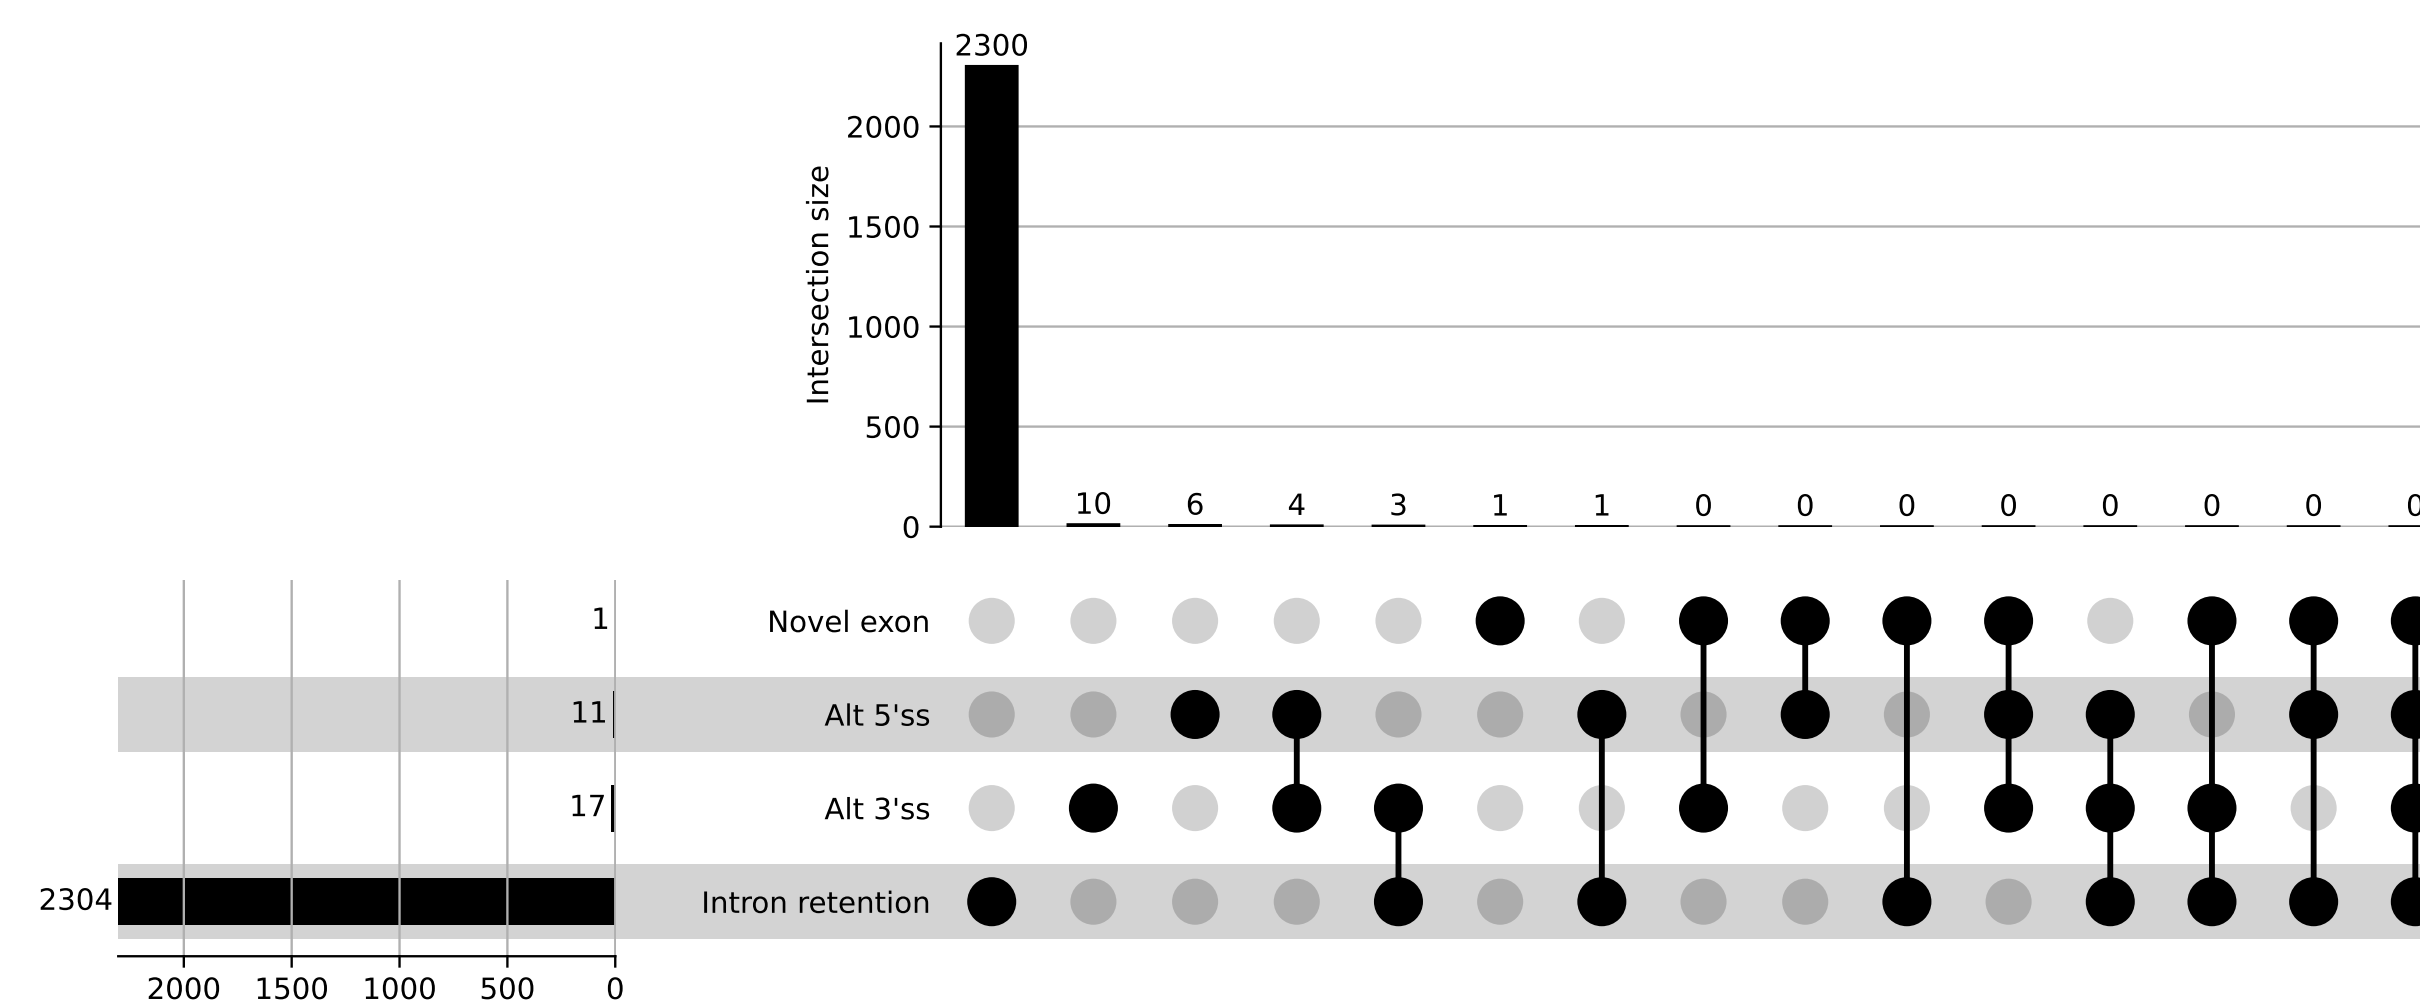

Supplement: Supplemental_code.zip [file Supplemental_Fig_S6.pdf › Supplemental_code/figures/Supplemental_Fig_S6/Supplemental_Fig_S6.pdf]
