# Supplementary material for: Contrasting and combining transcriptome complexity captured by short and long RNA sequencing reads
Source: HighWire-hosted journal article supplement (doi:10.1101/gr.278659.123), 2024-09-25

A

GTEX Heart atrial appendage  
MAJIQ and FLAIR ONT comparison

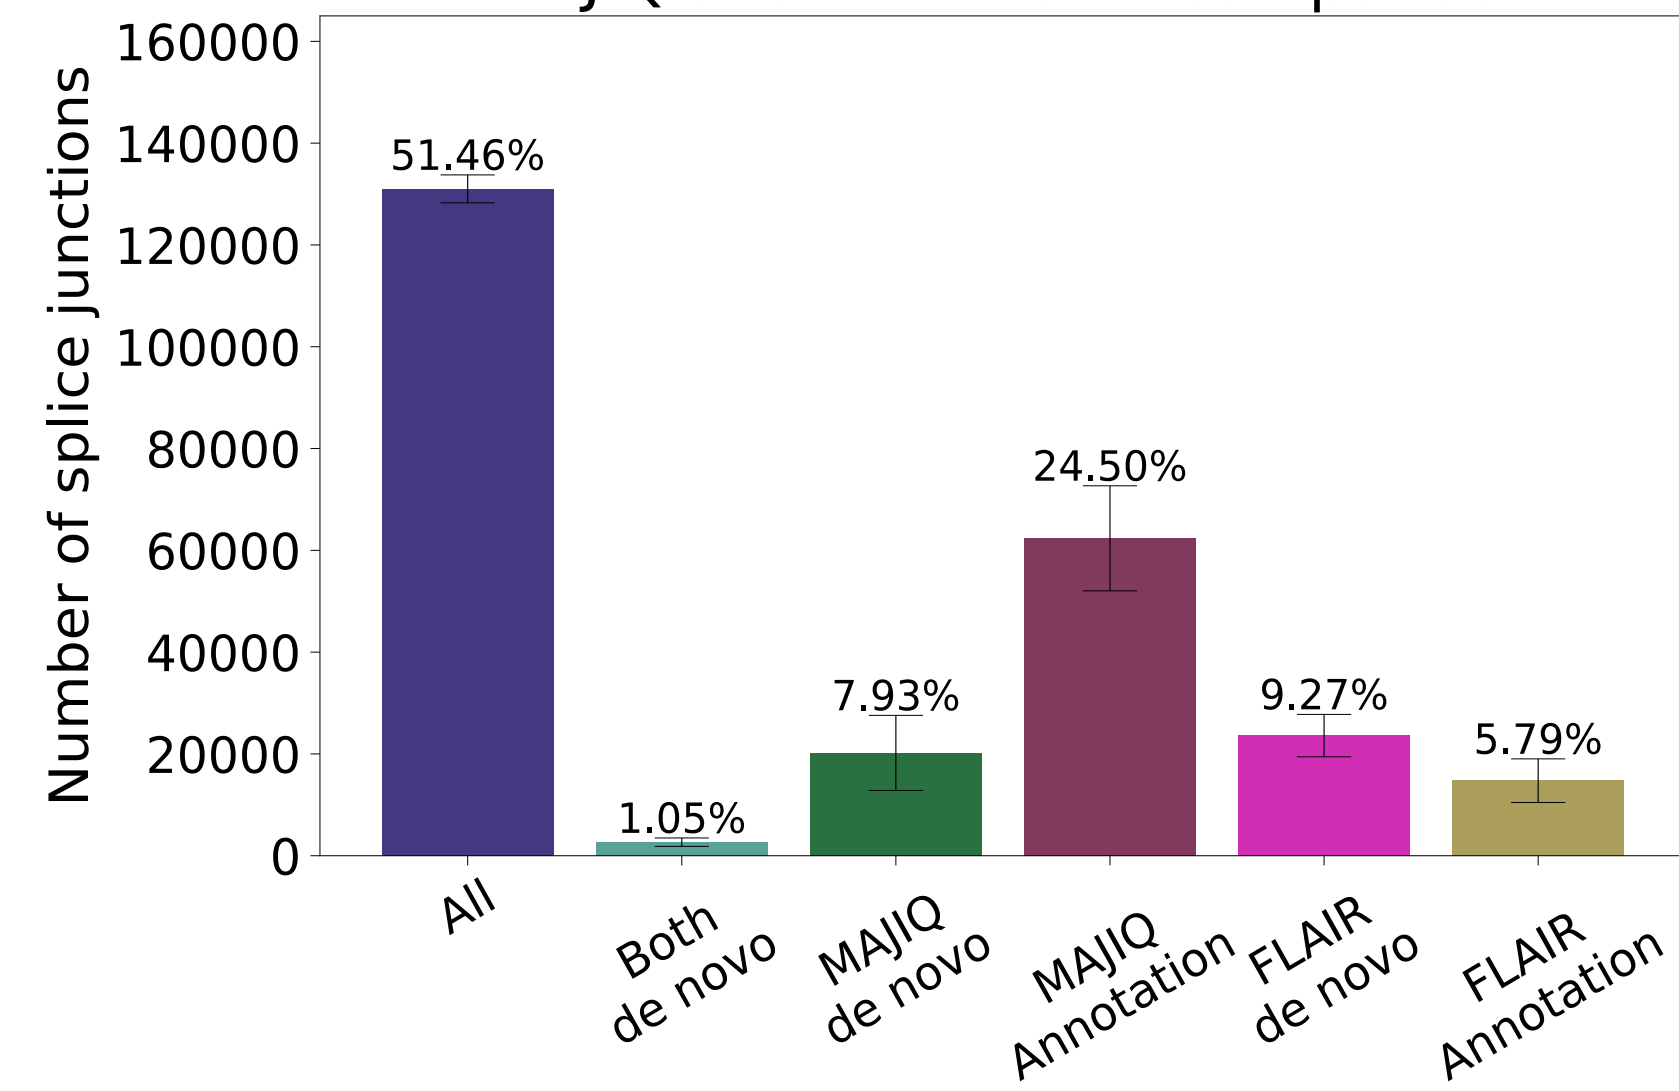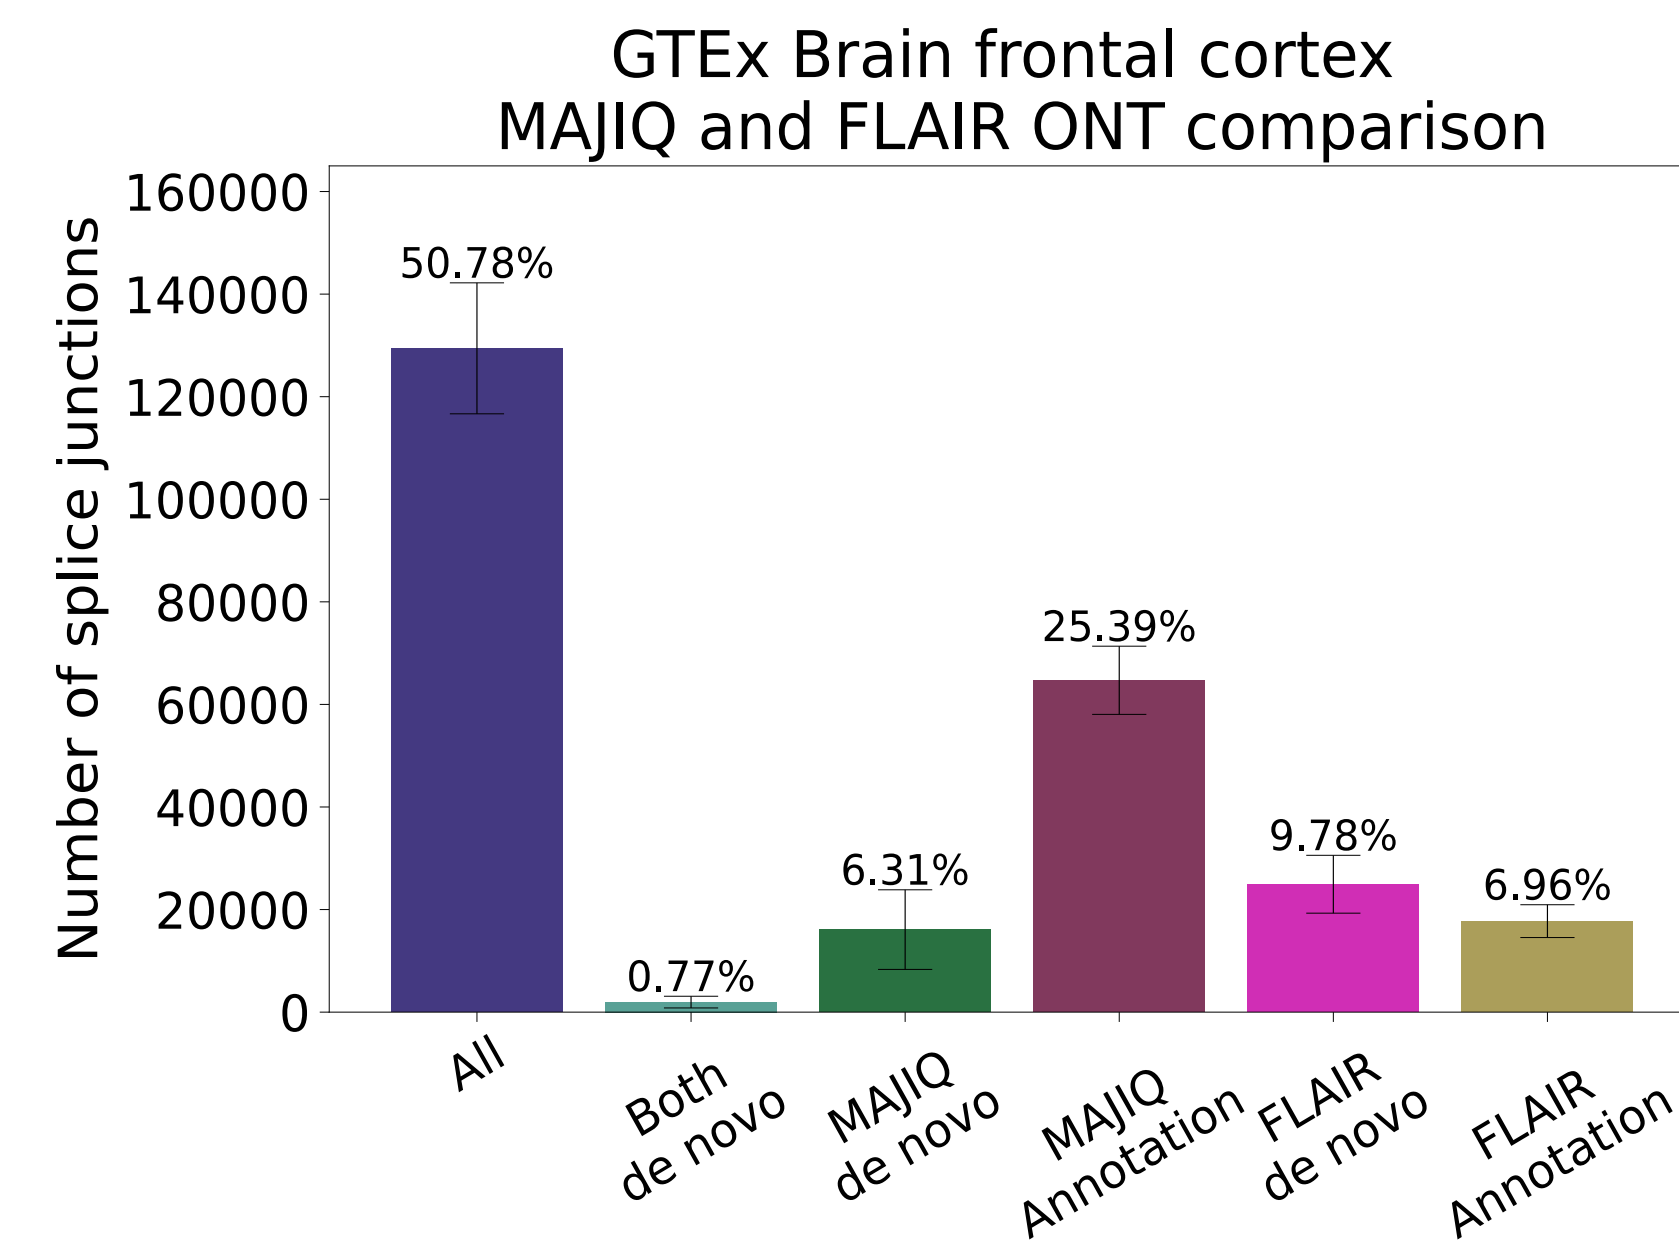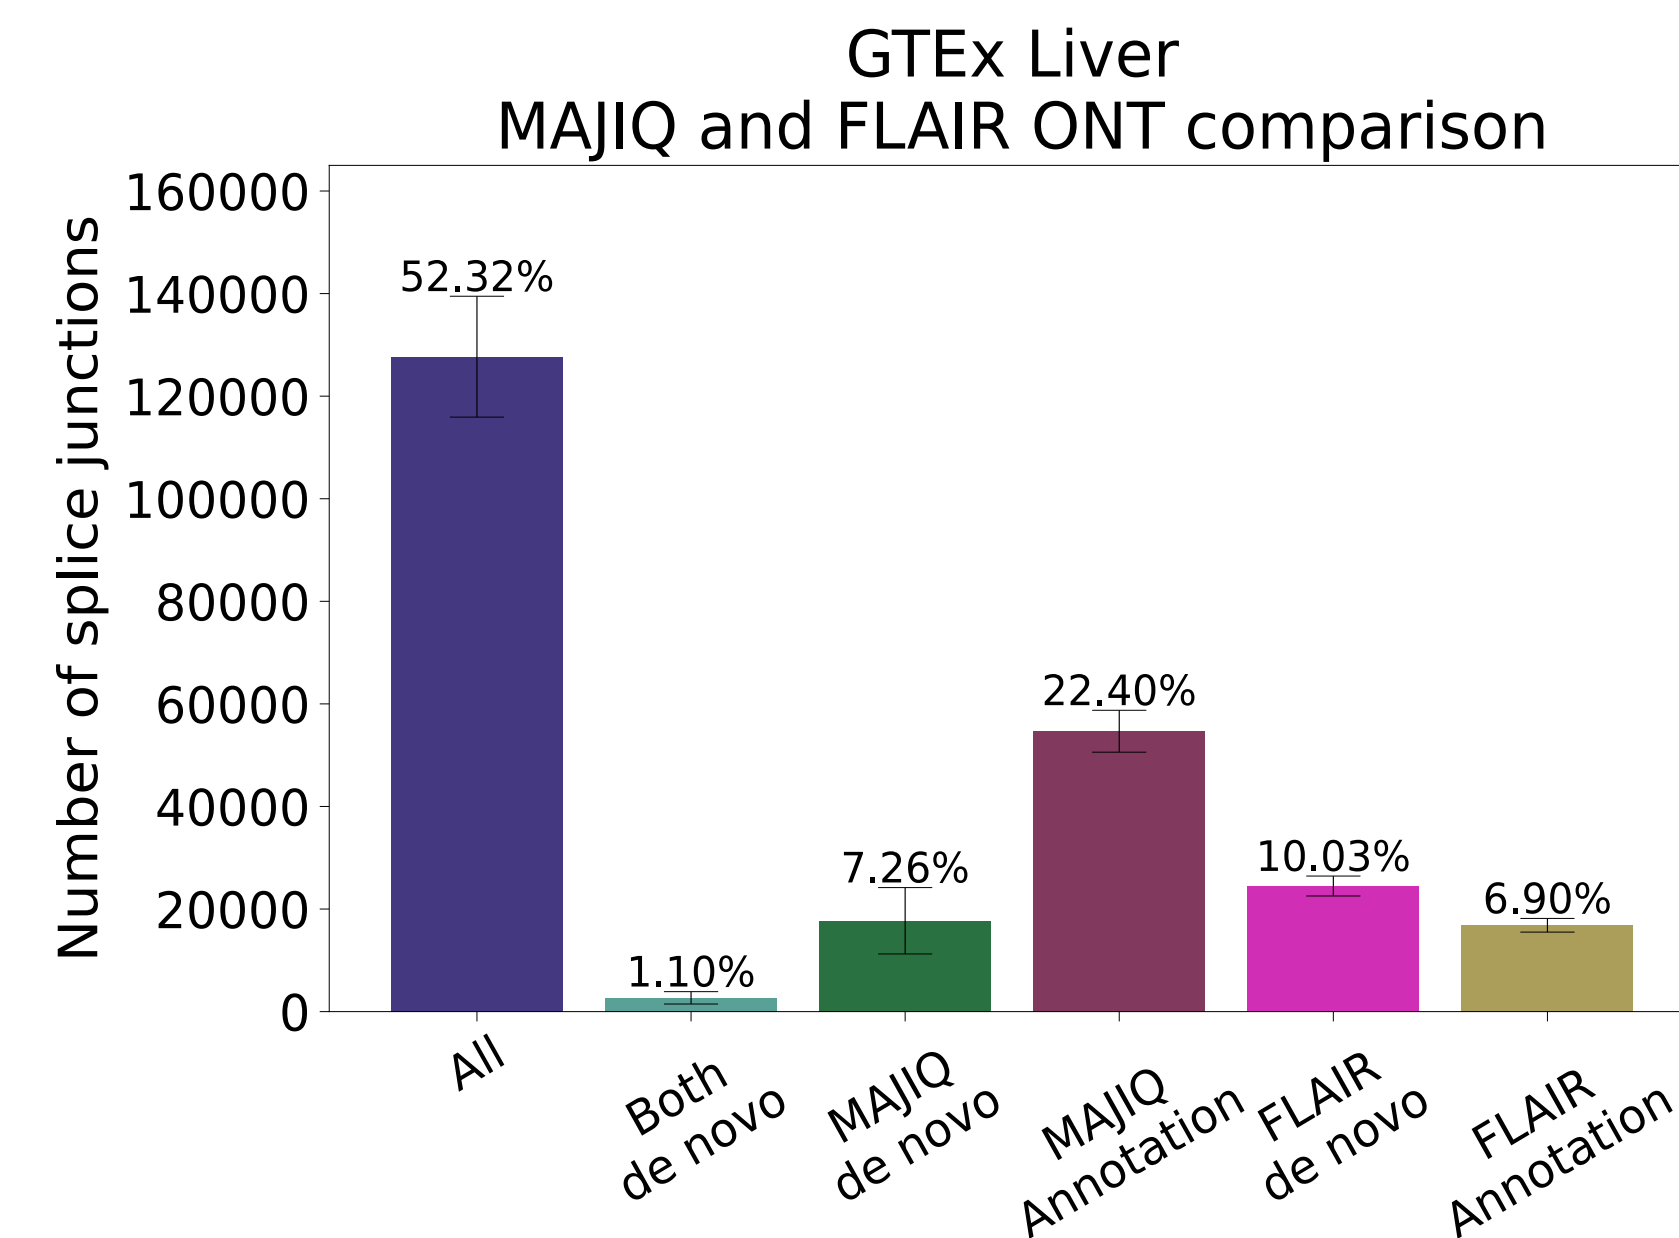

B

MAJIQ and FLAIR PacBio comparison

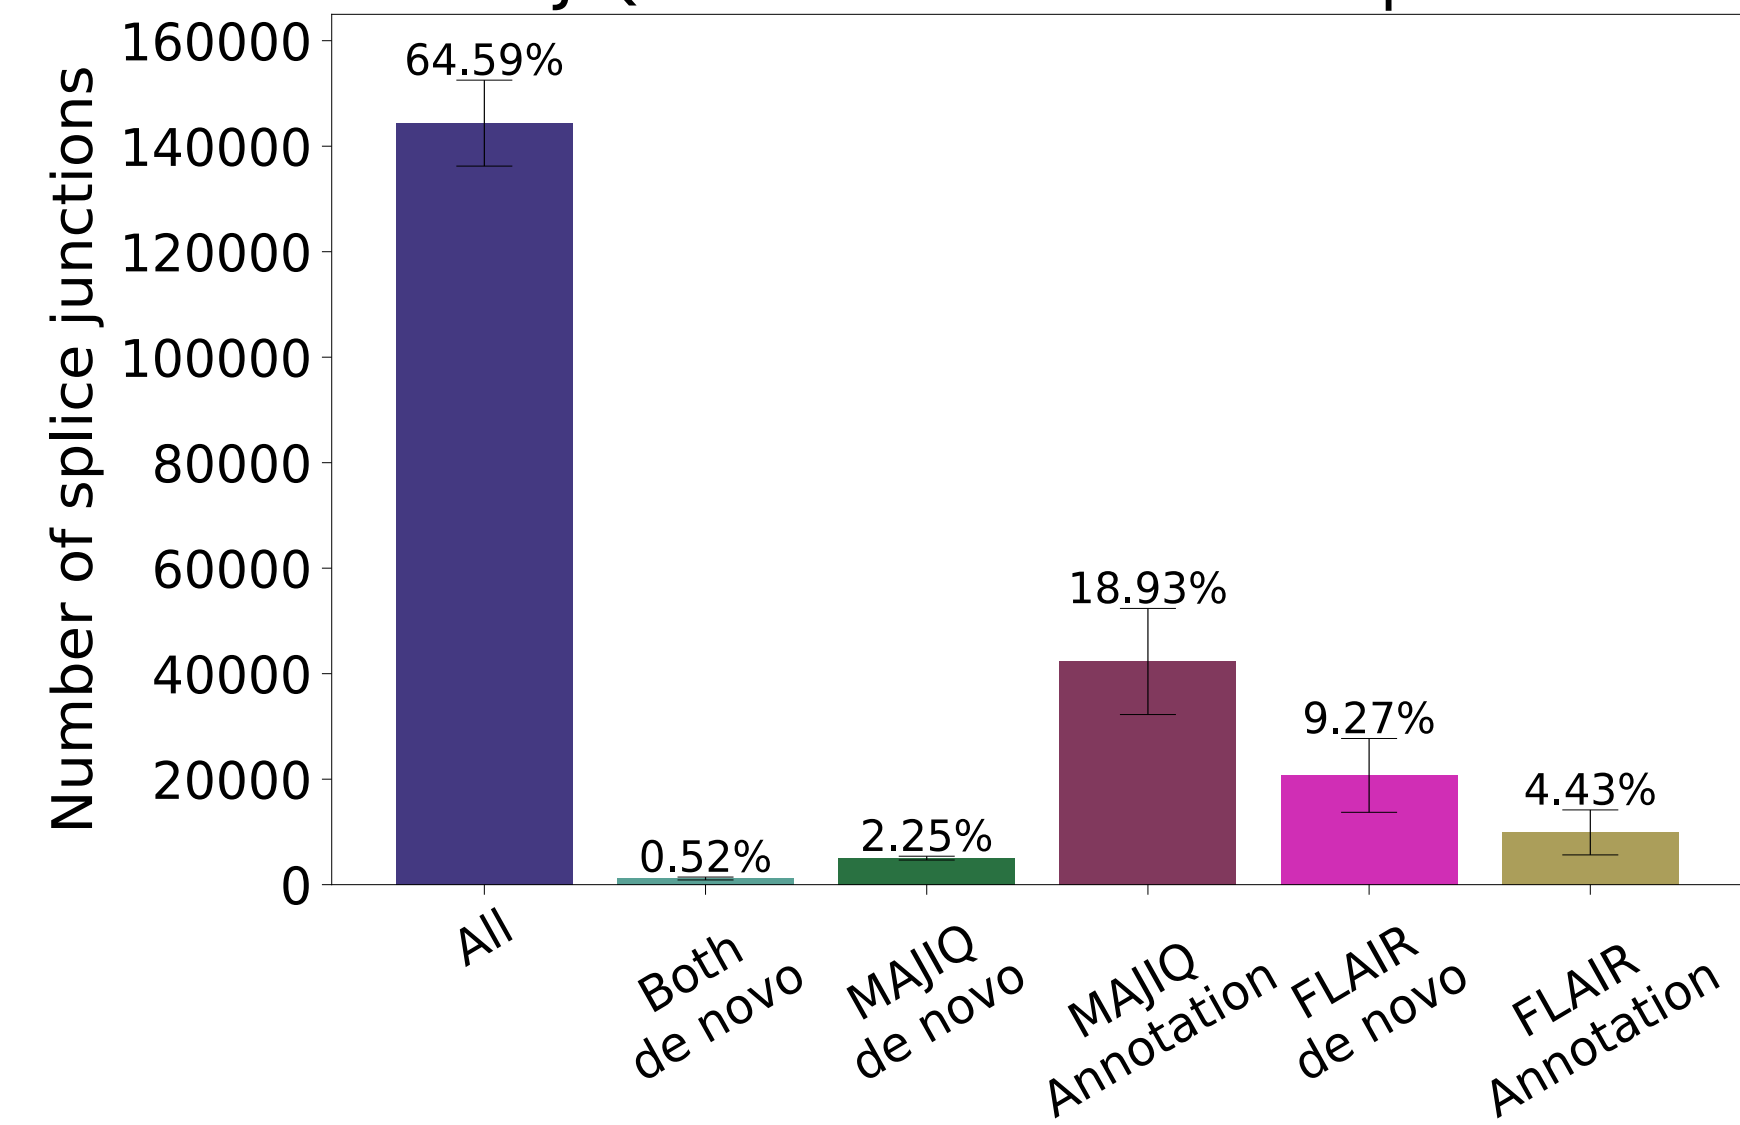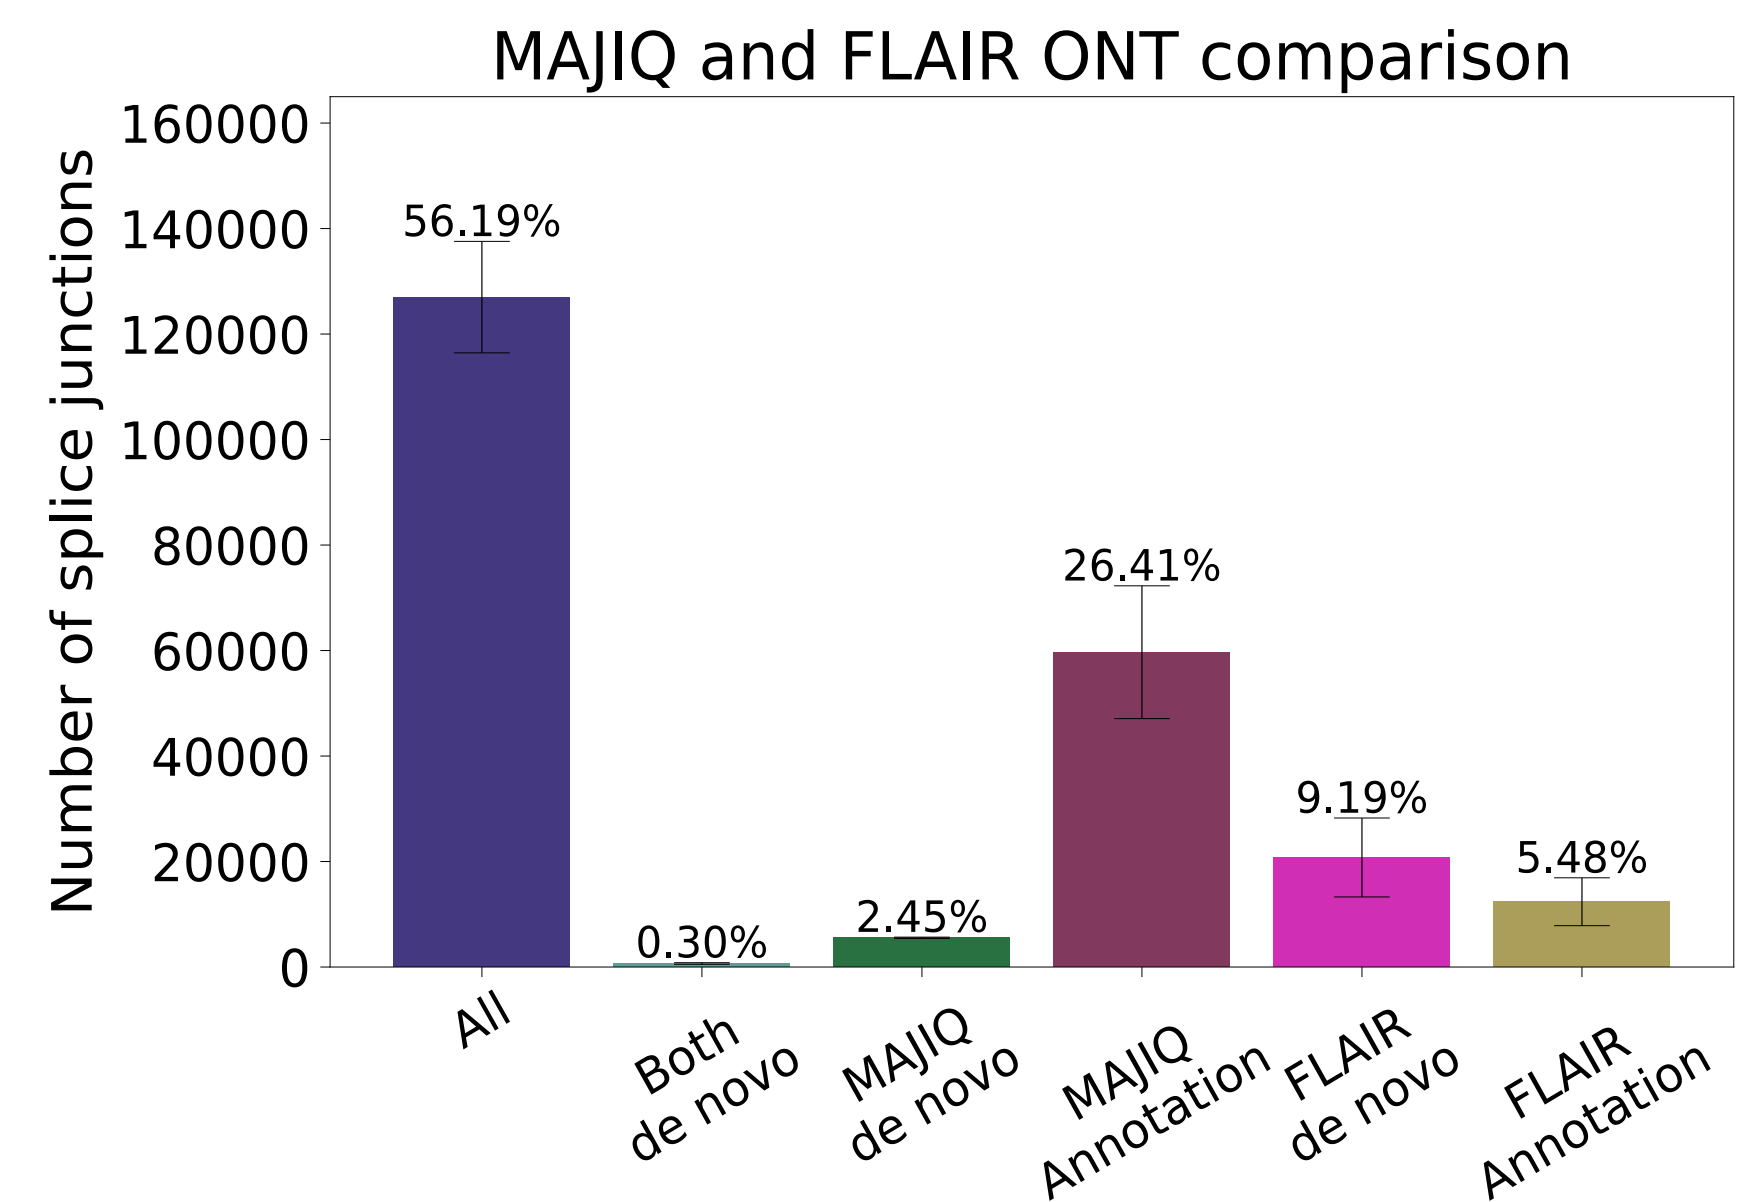

C

ALL1807: MAJIQ and FLAIR ONT comparison

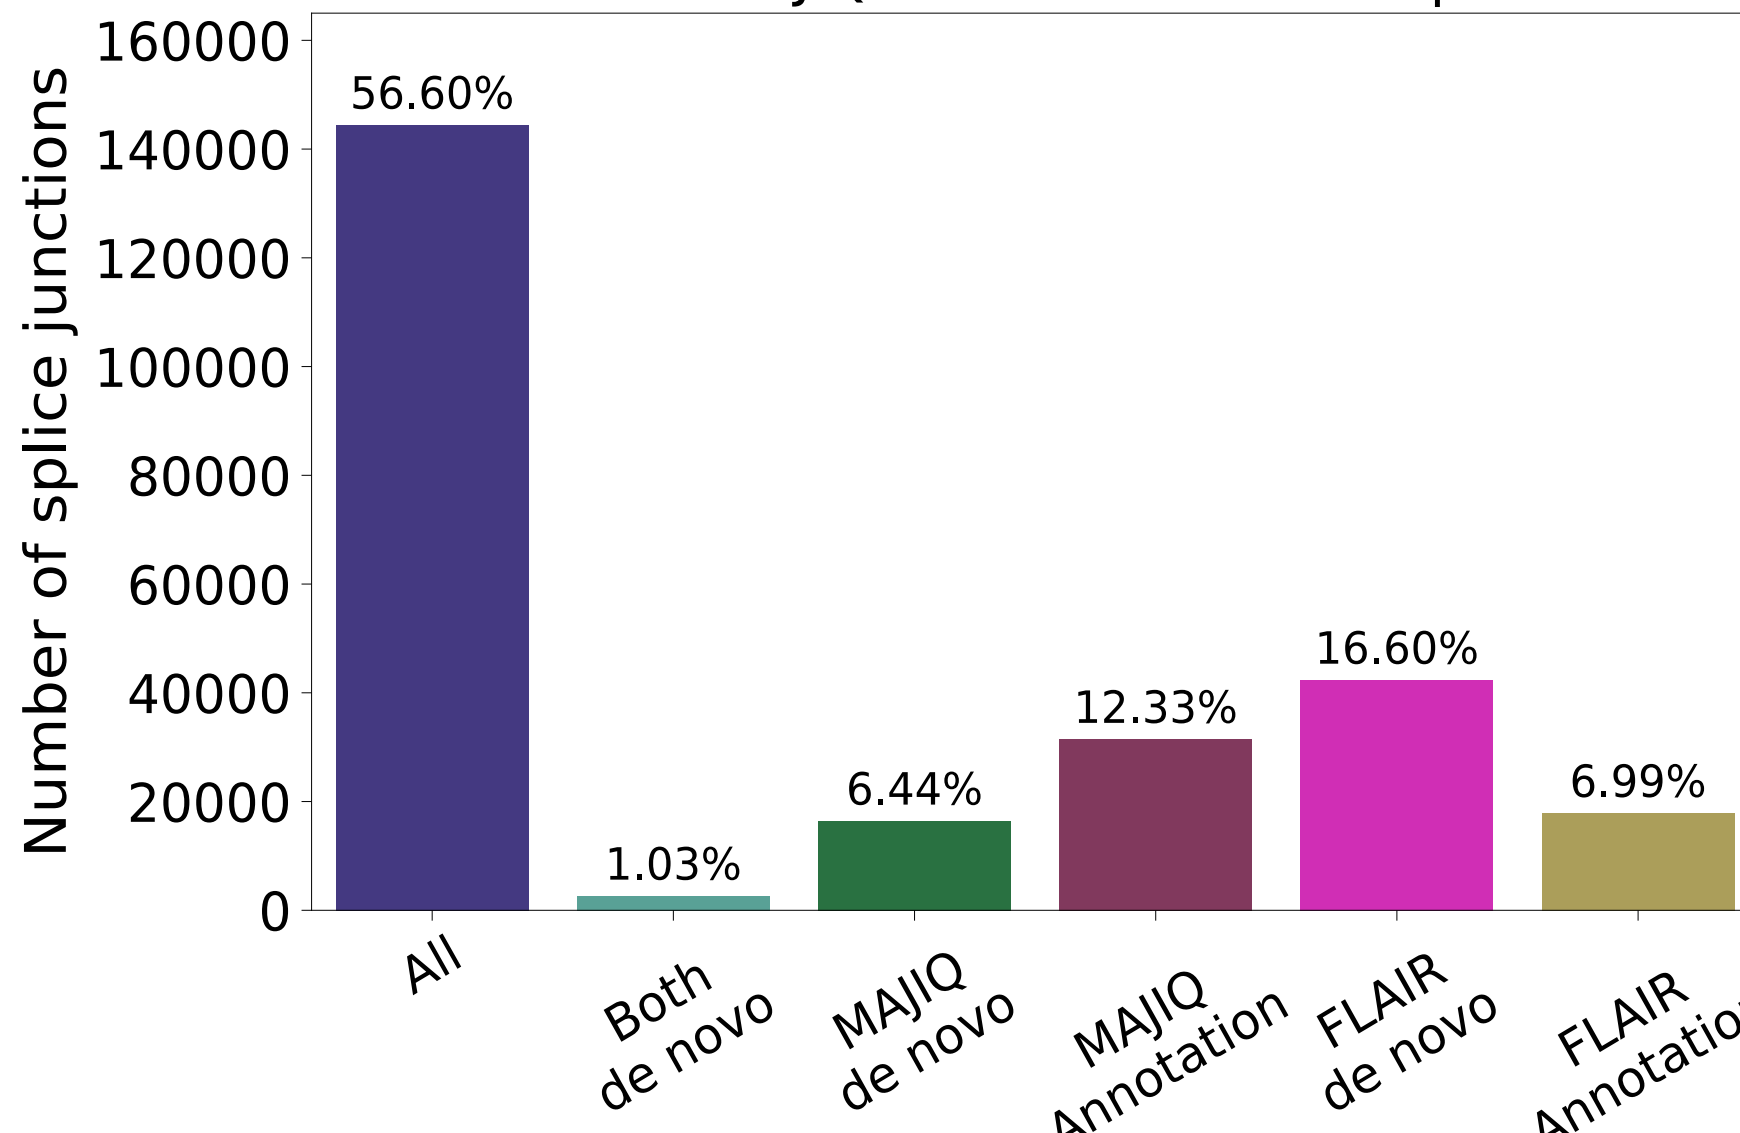

MAJIQ and IsoQuant PacBio comparison

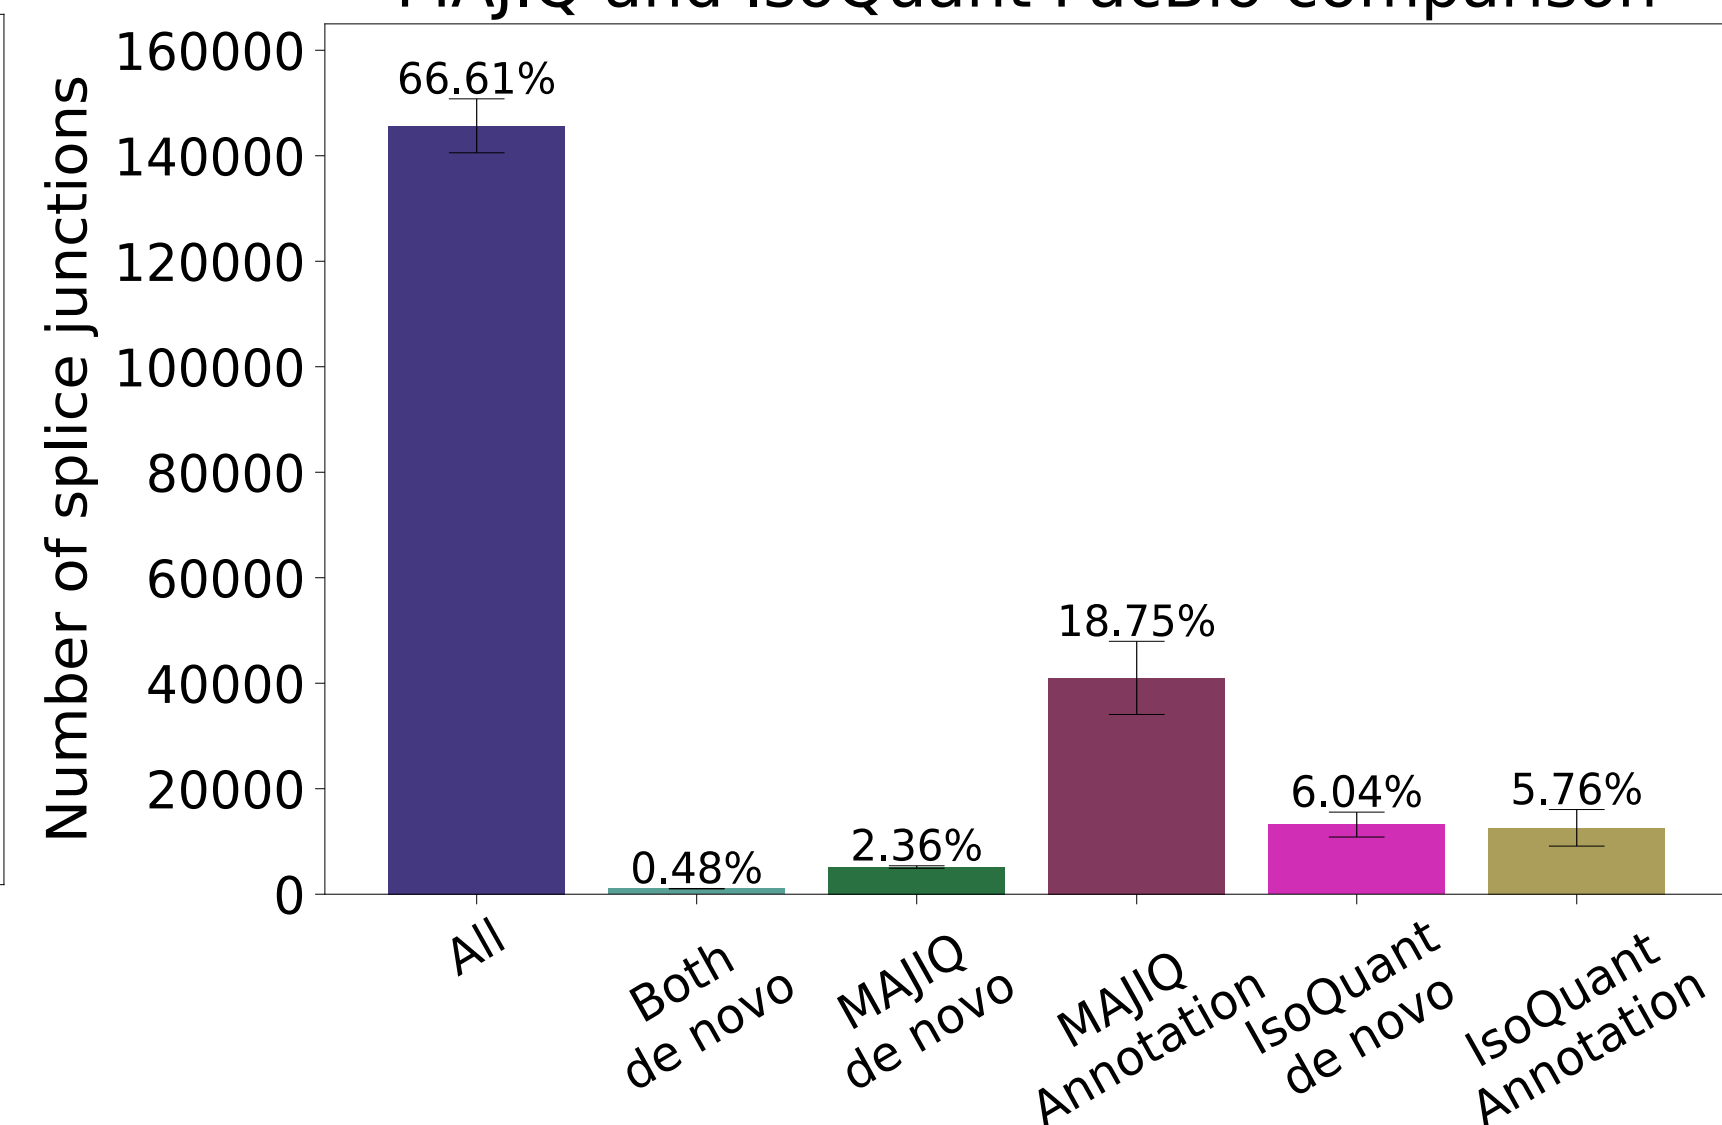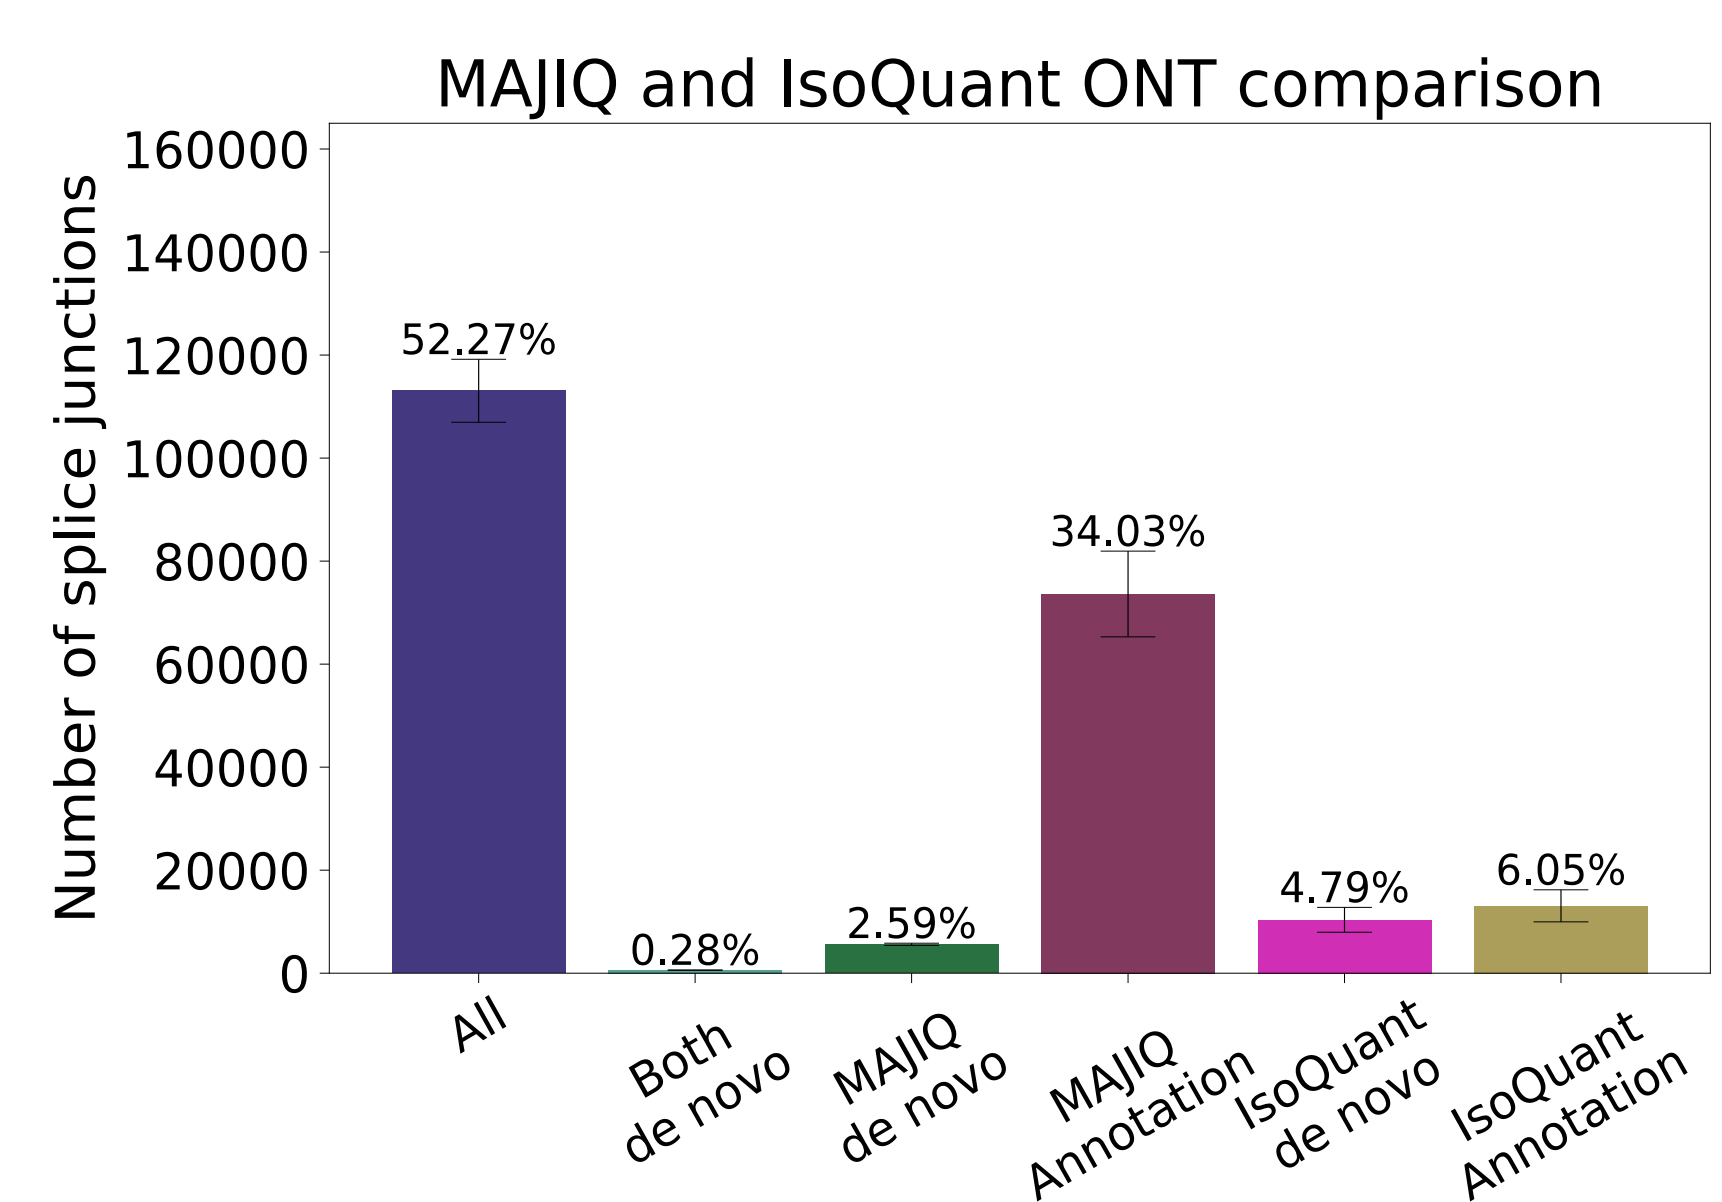

ALL1807: MAJIQ and IsoQuant ONT comparison

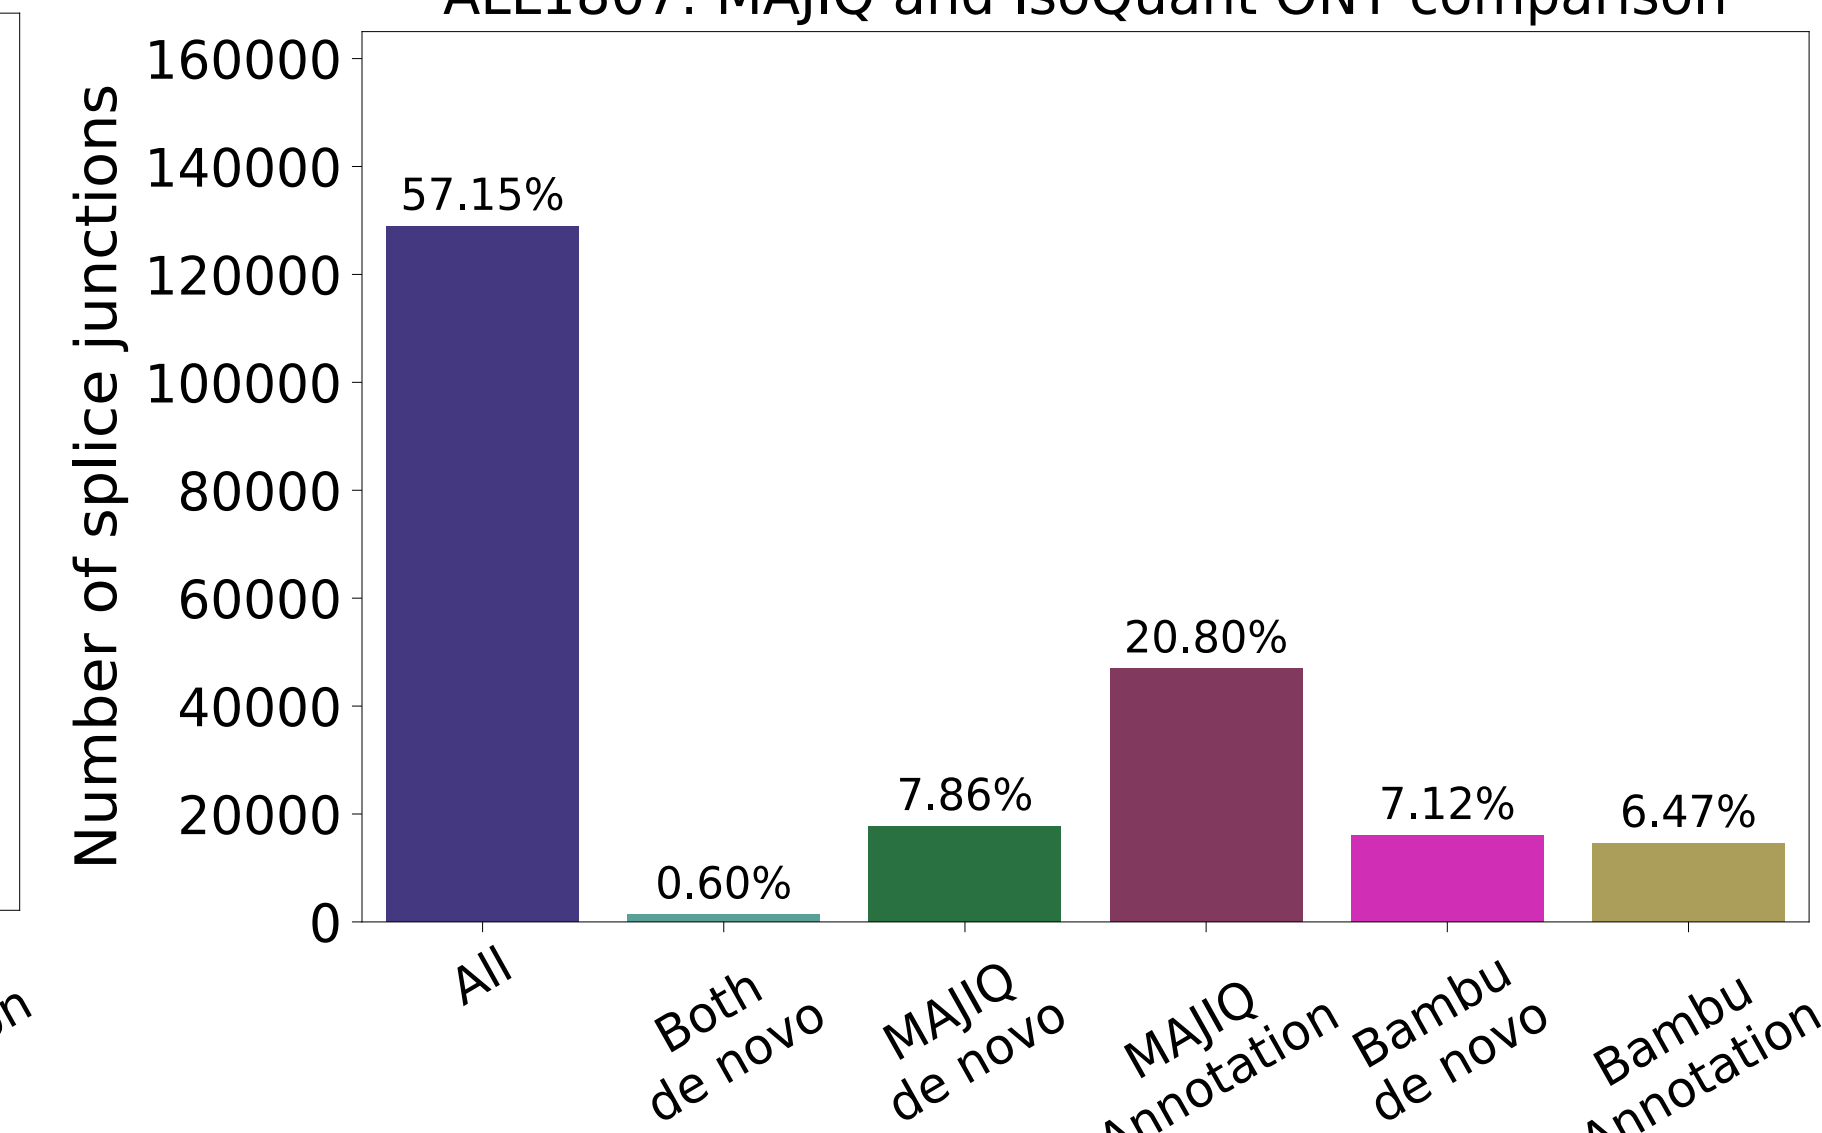

MAJIQ and ESPRESSO PacBio comparison

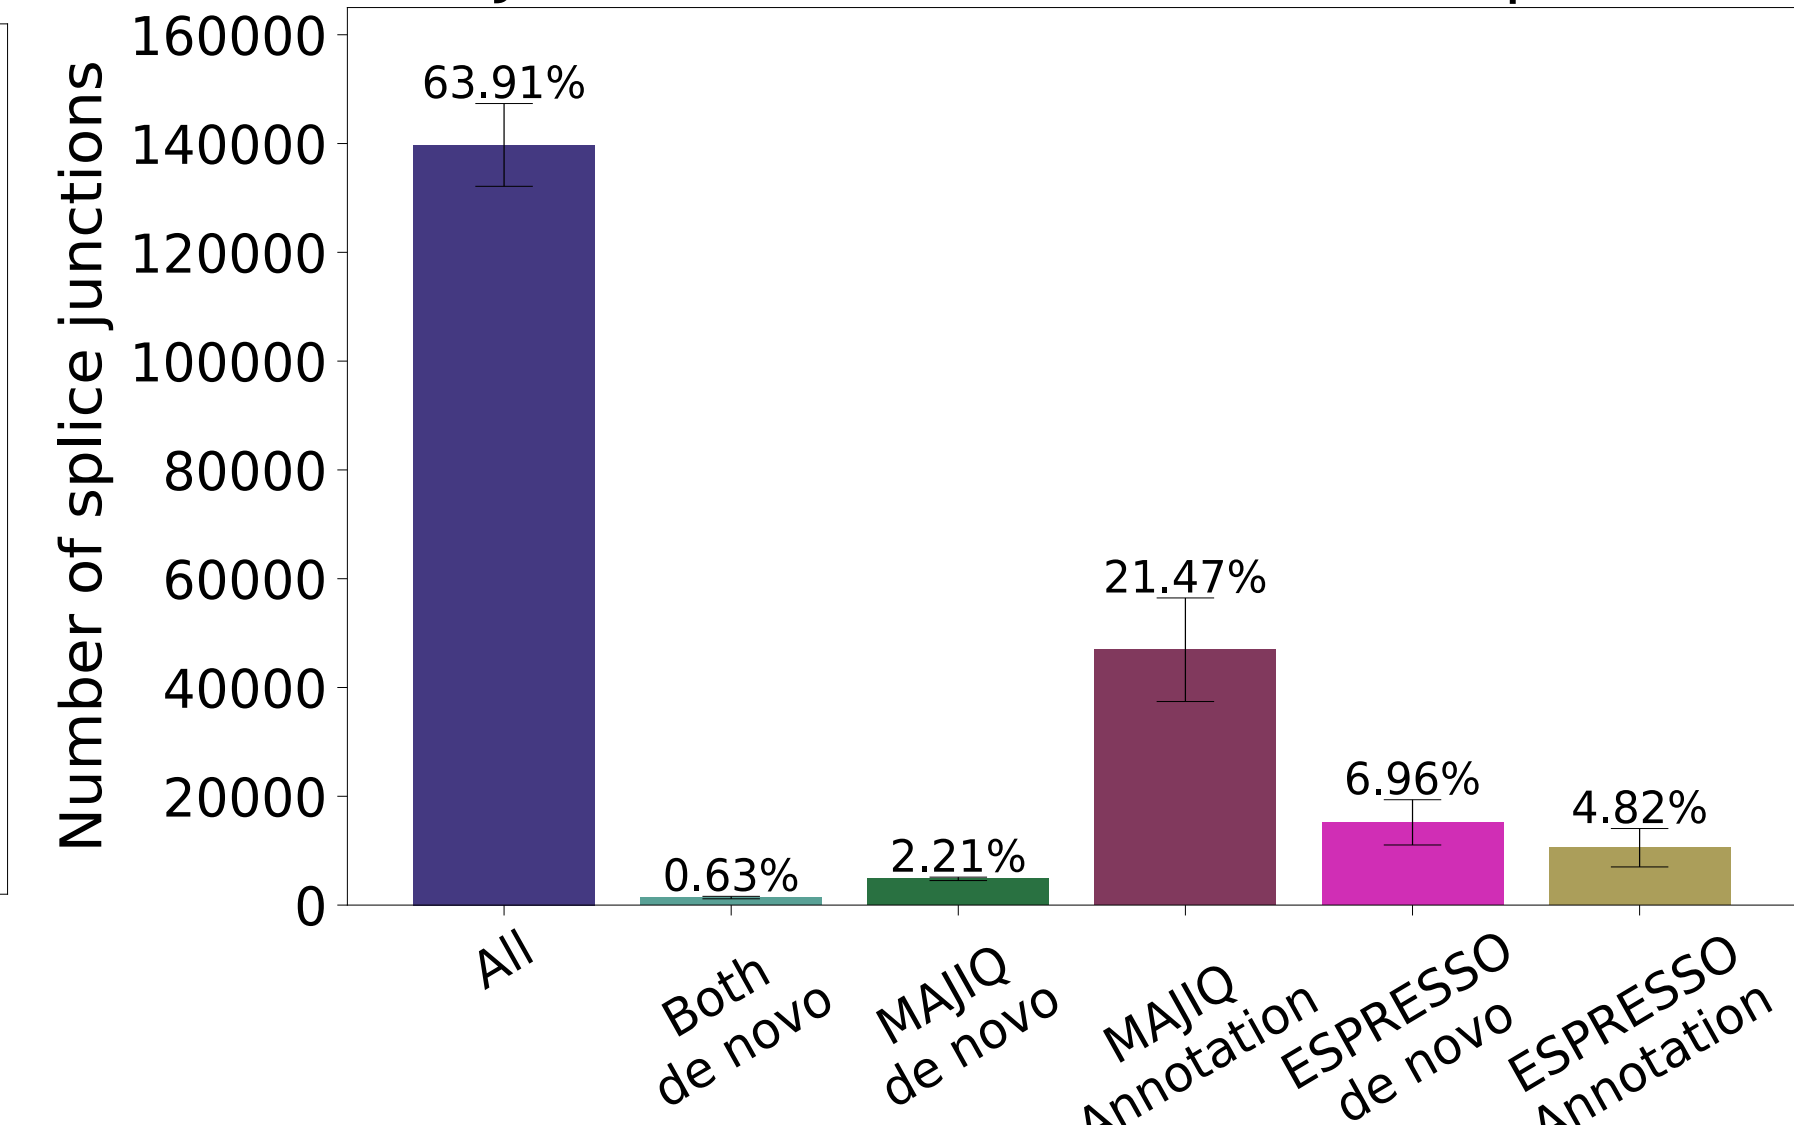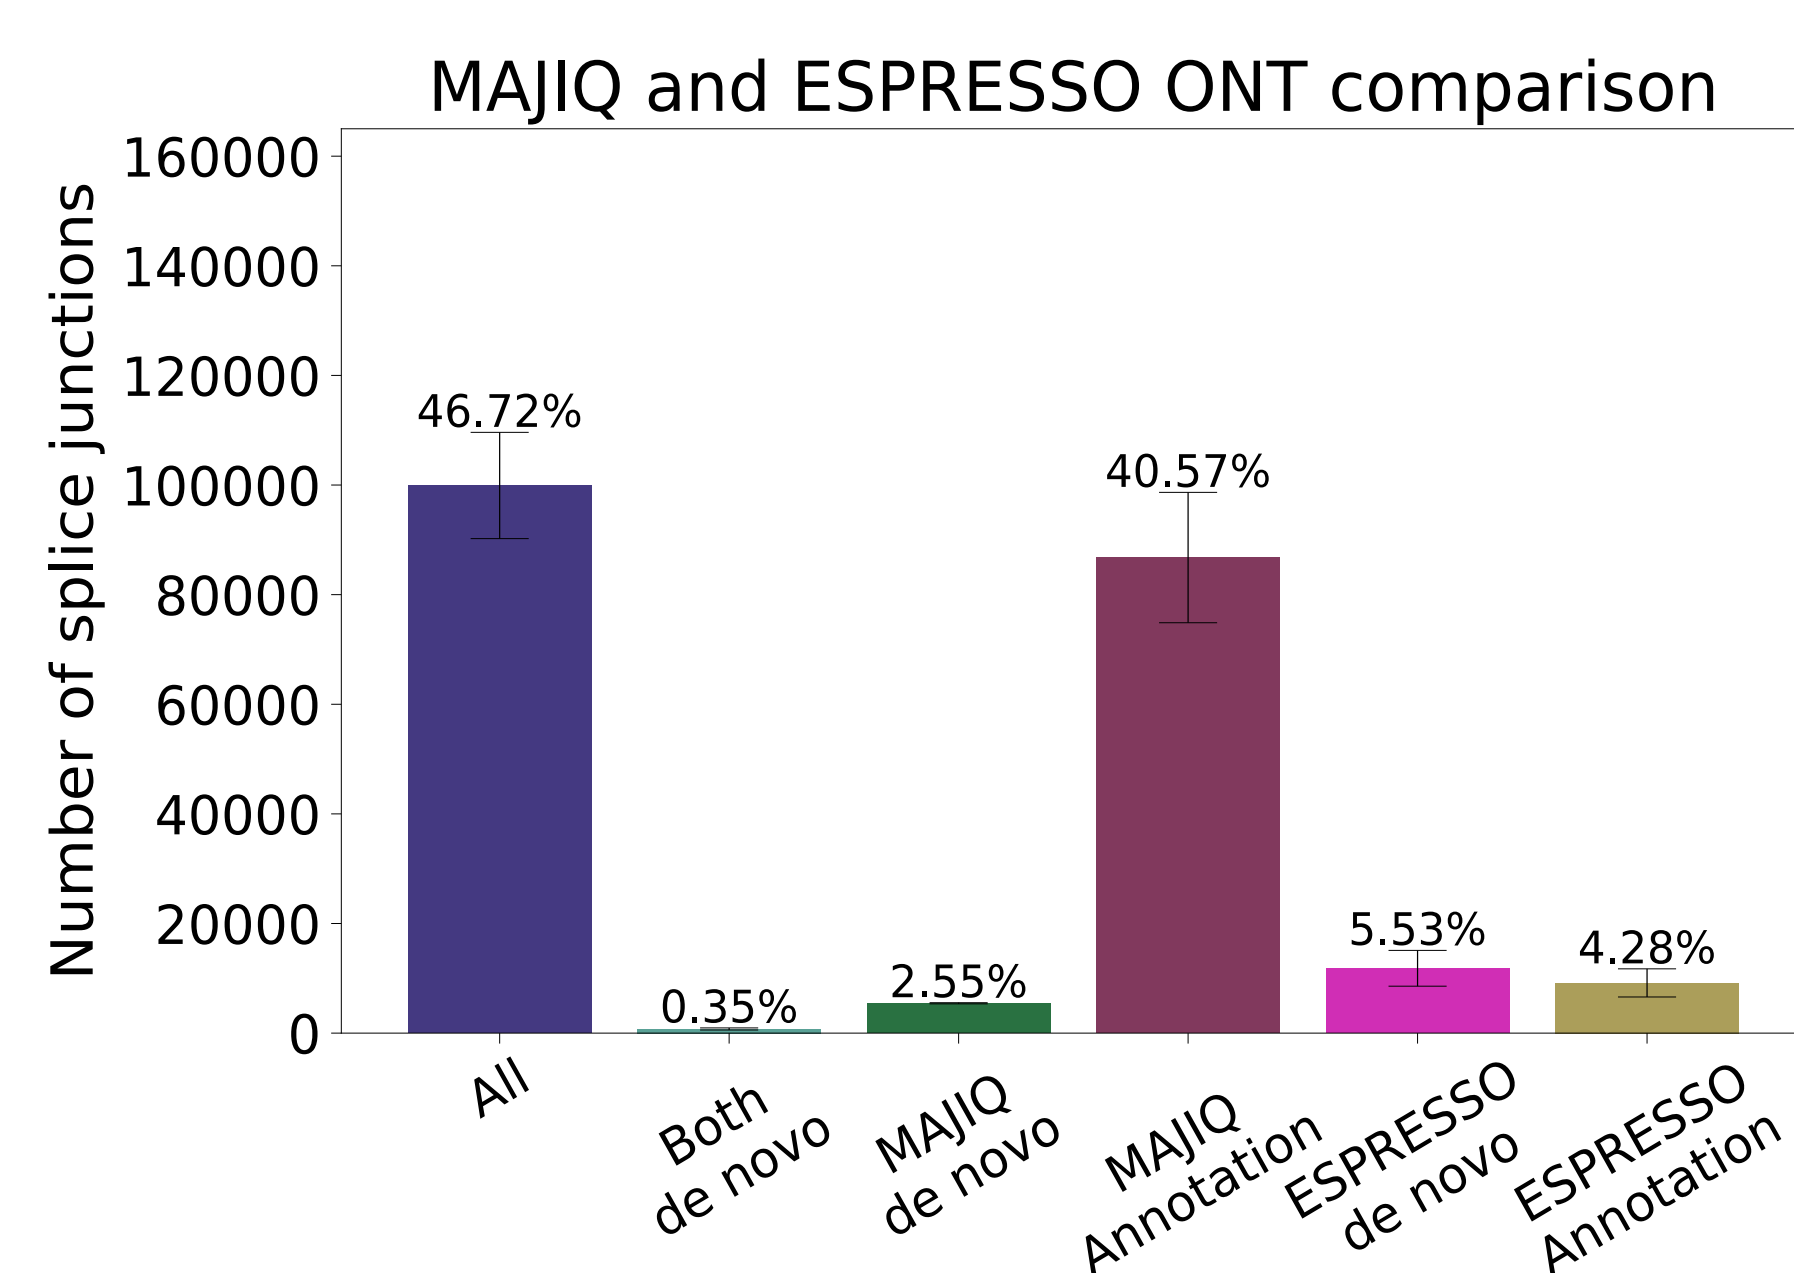

ALL1807: MAJIQ and ESPRESSO ONT comparison

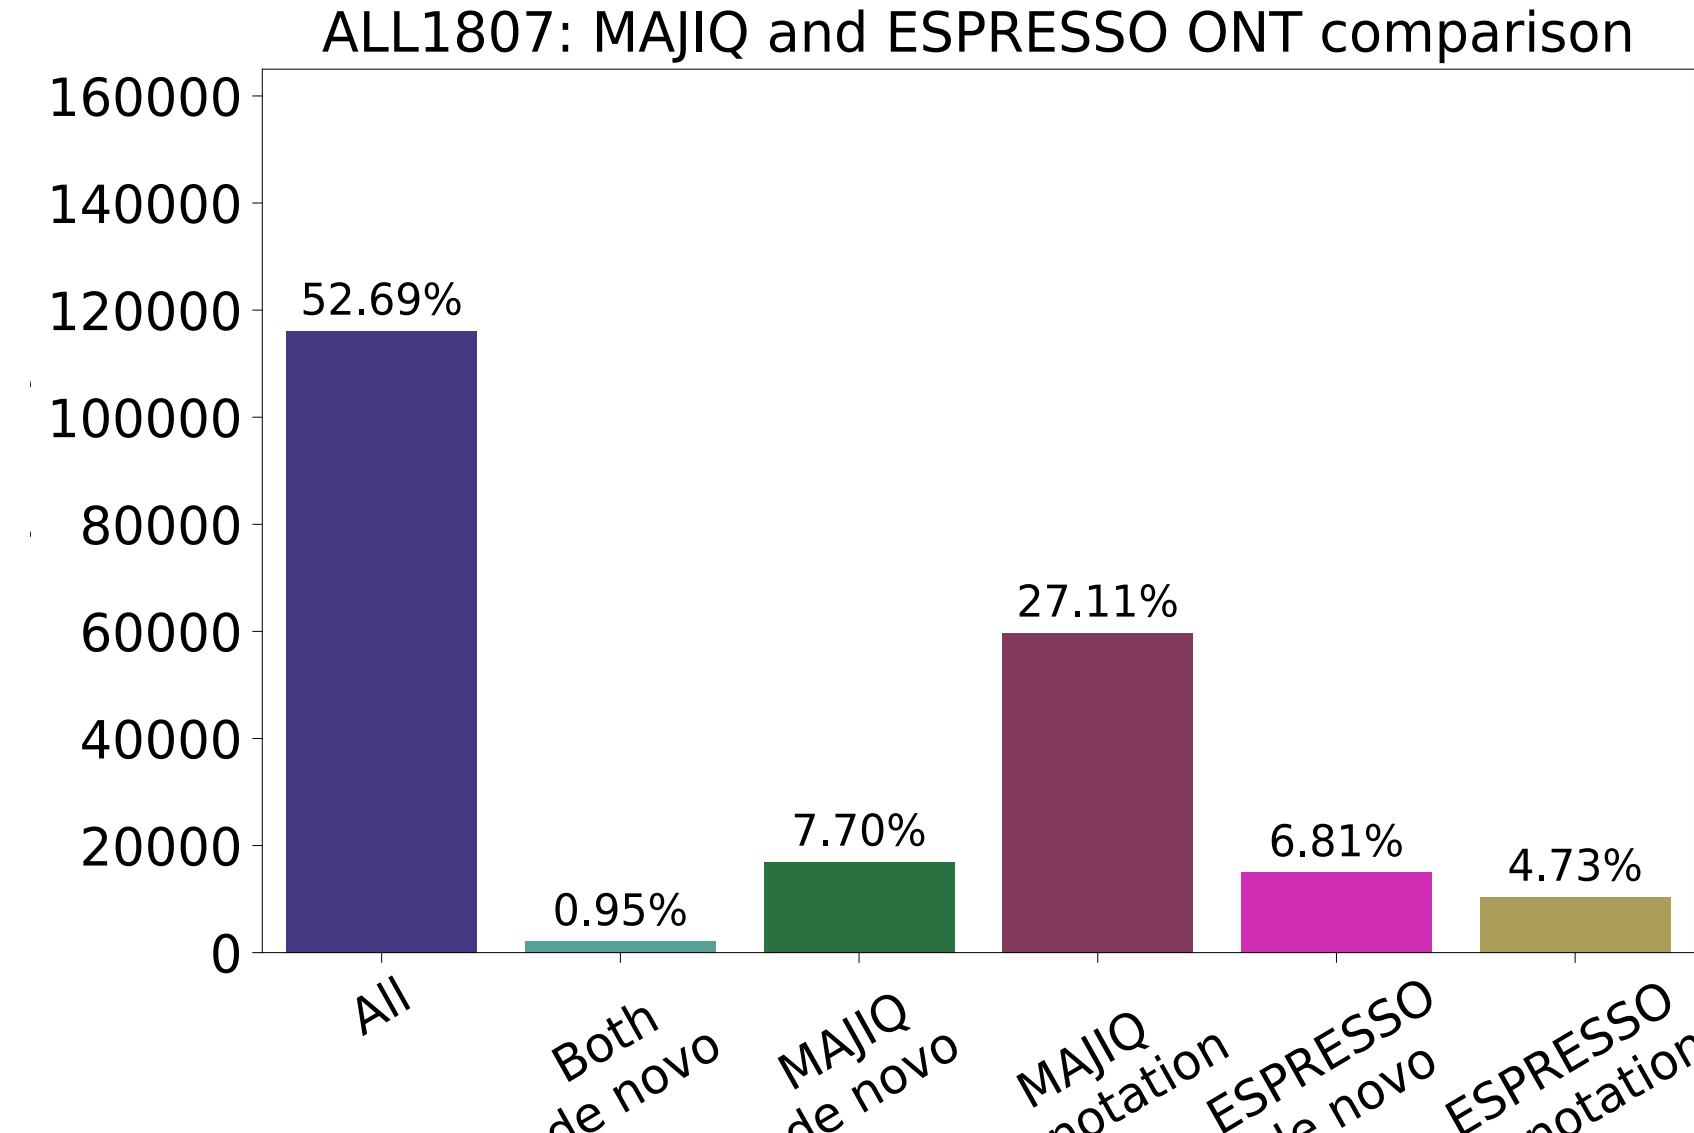

MAJIQ and Bambo PacBio comparison

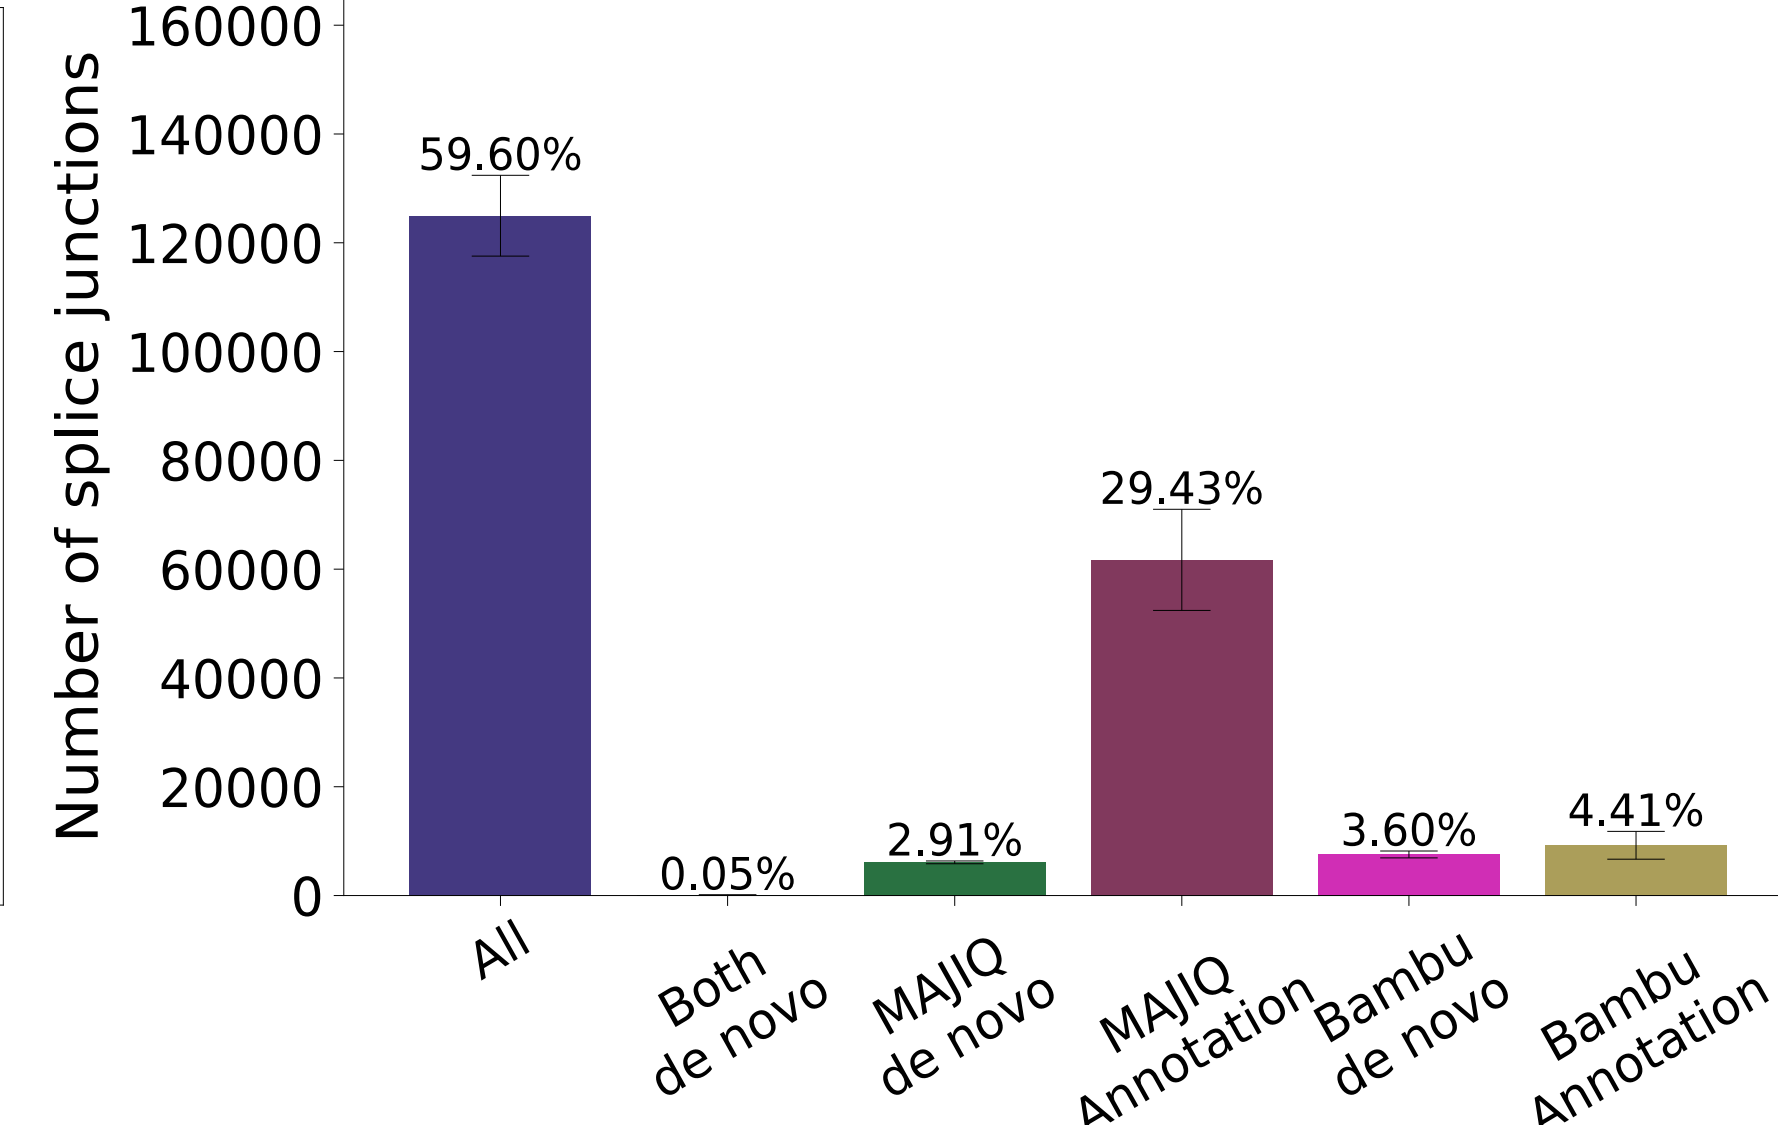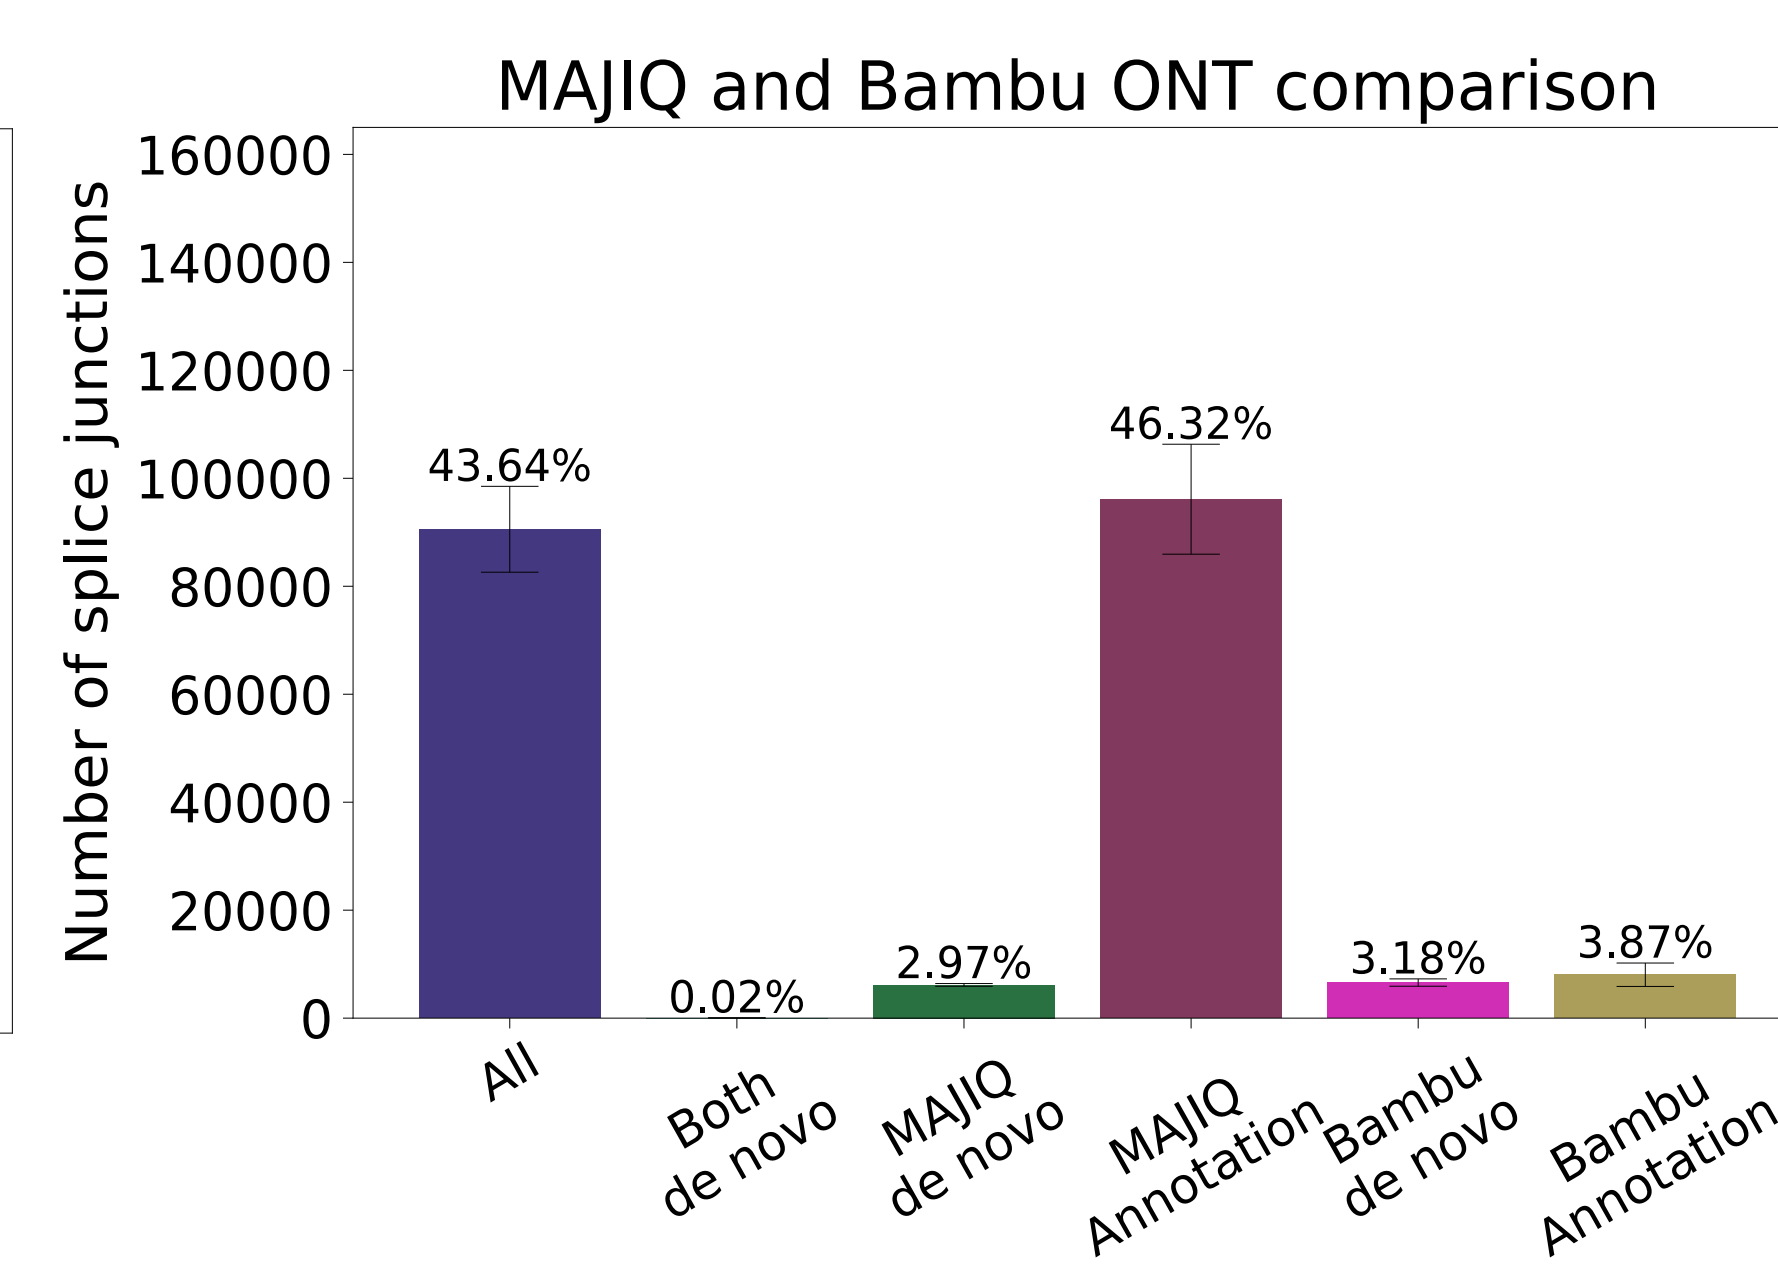

ALL1807: MAJIQ and Bambo ONT comparison

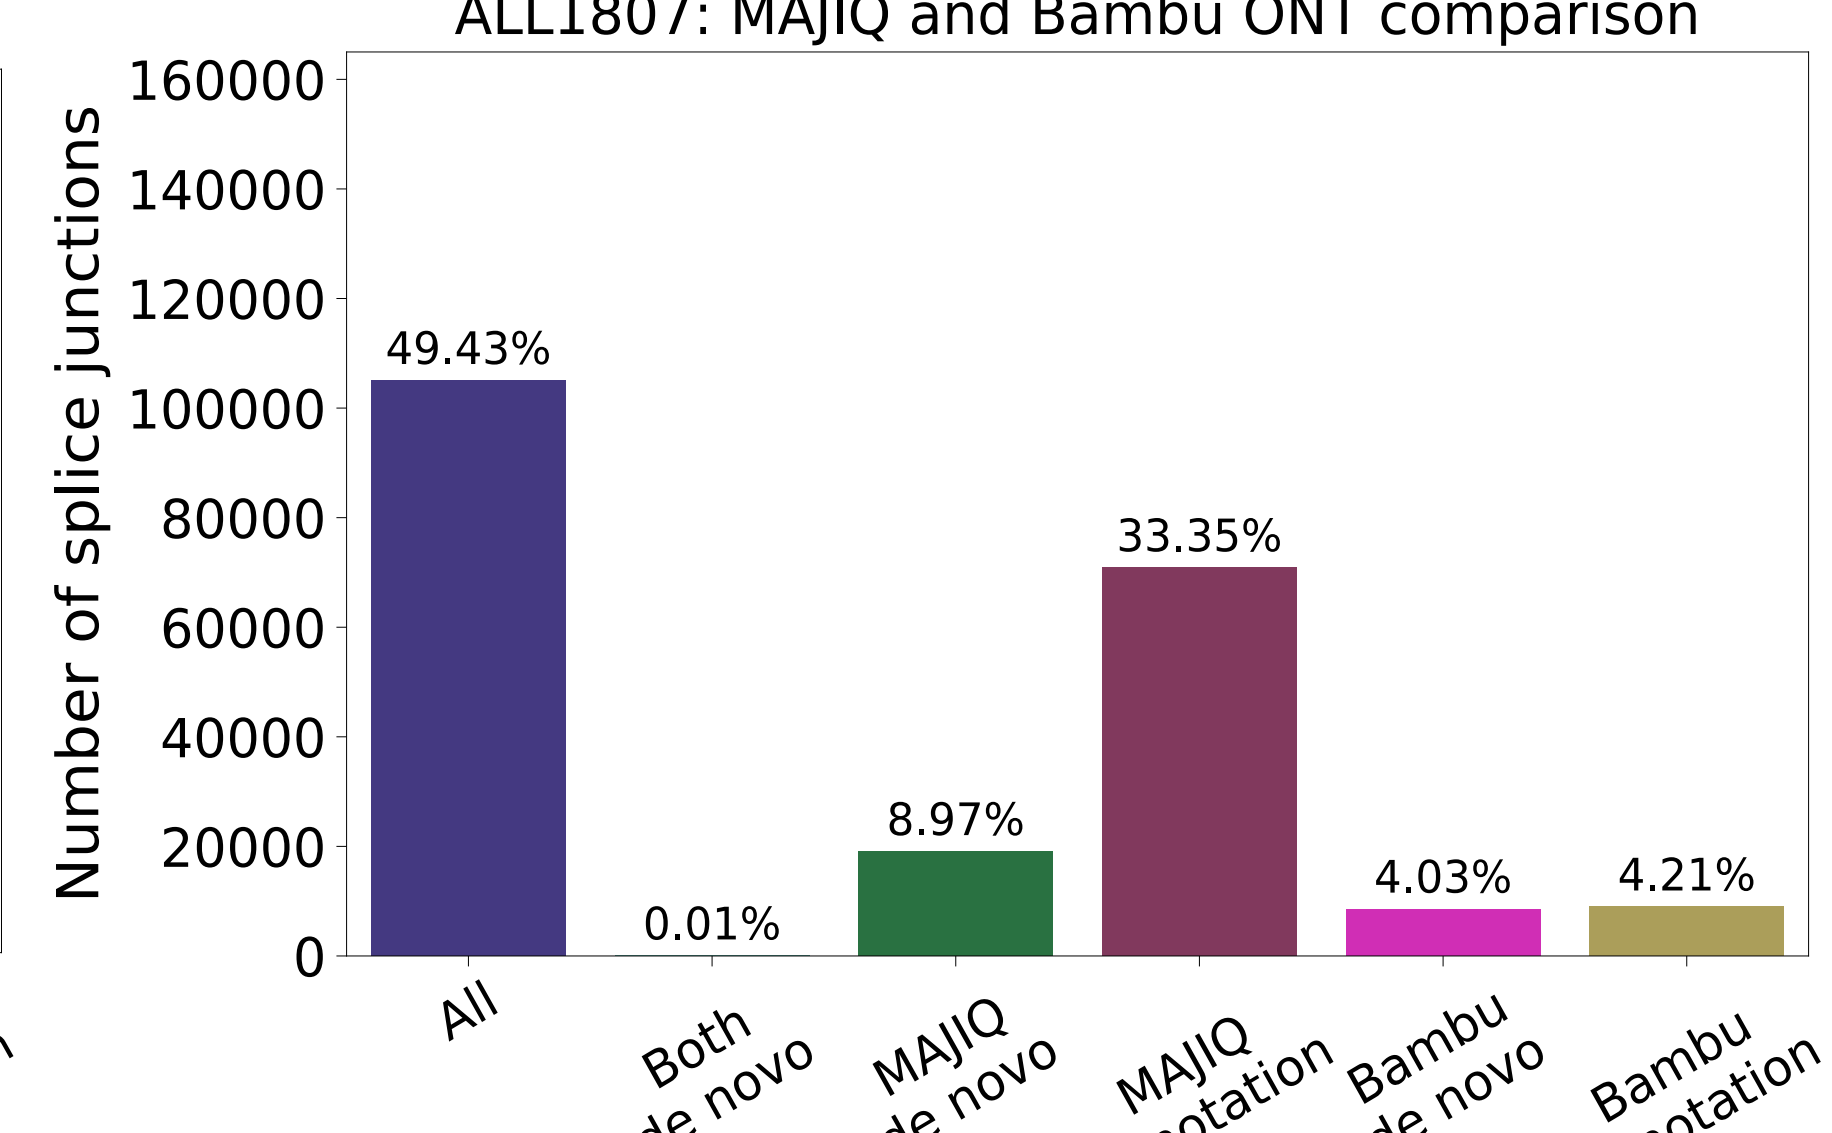

Supplement: Supplemental_code.zip [file Supplemental_Fig_S2.pdf › Supplemental_code/figures/Supplemental_Fig_S2/Supplemental_Fig_S2.pdf]
