# Supplementary material for: Contrasting and combining transcriptome complexity captured by short and long RNA sequencing reads
Source: HighWire-hosted journal article supplement (doi:10.1101/gr.278659.123), 2024-09-25

A

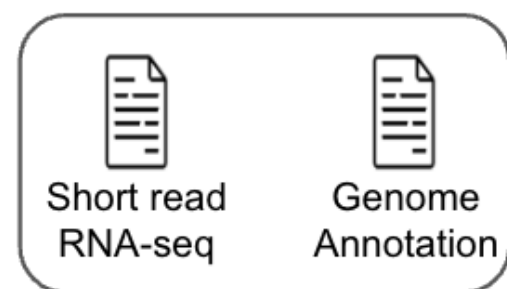

### MAJIQ

Local Splice Variations (LSV)  
Splice graph of possible isoforms

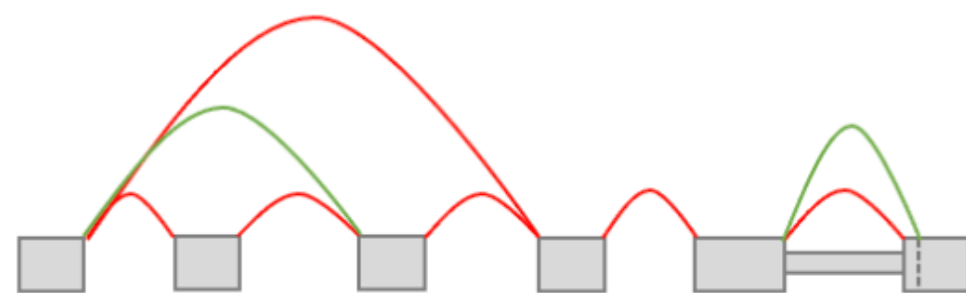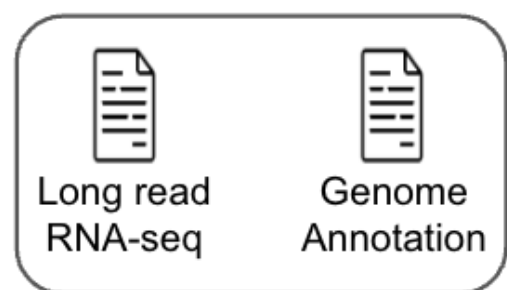

### Long read Algorithm

List of full isoforms

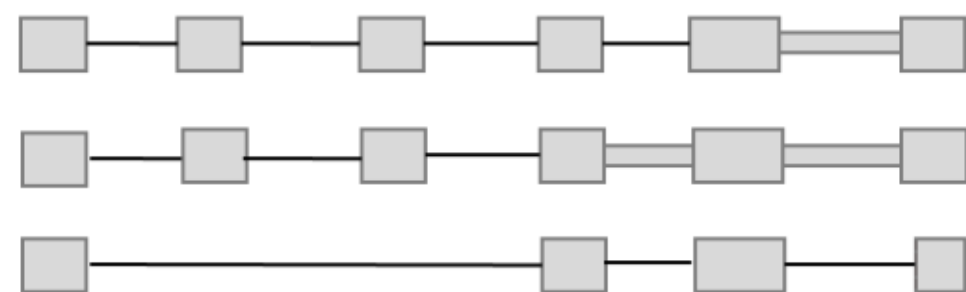

B

### Comparative analysis

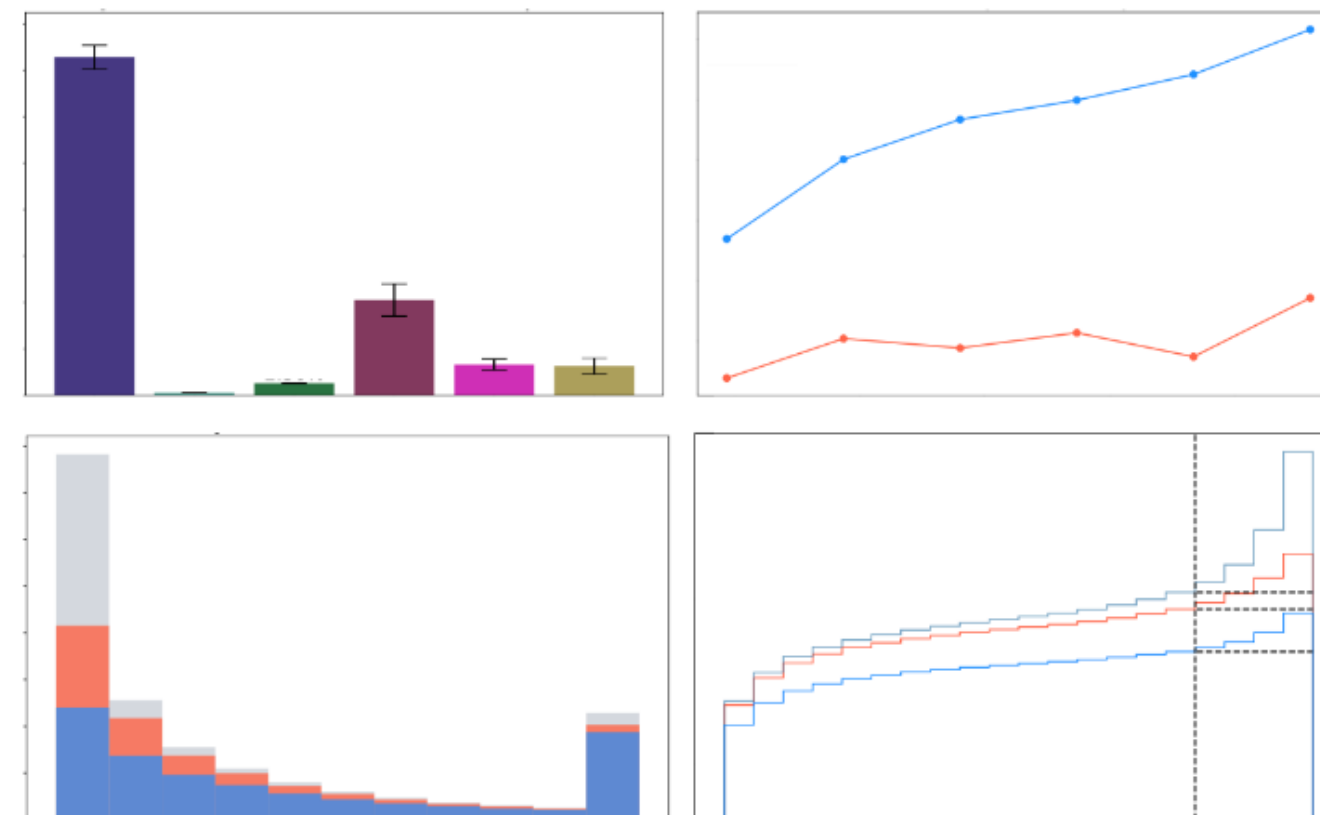

C

### Unified visualization

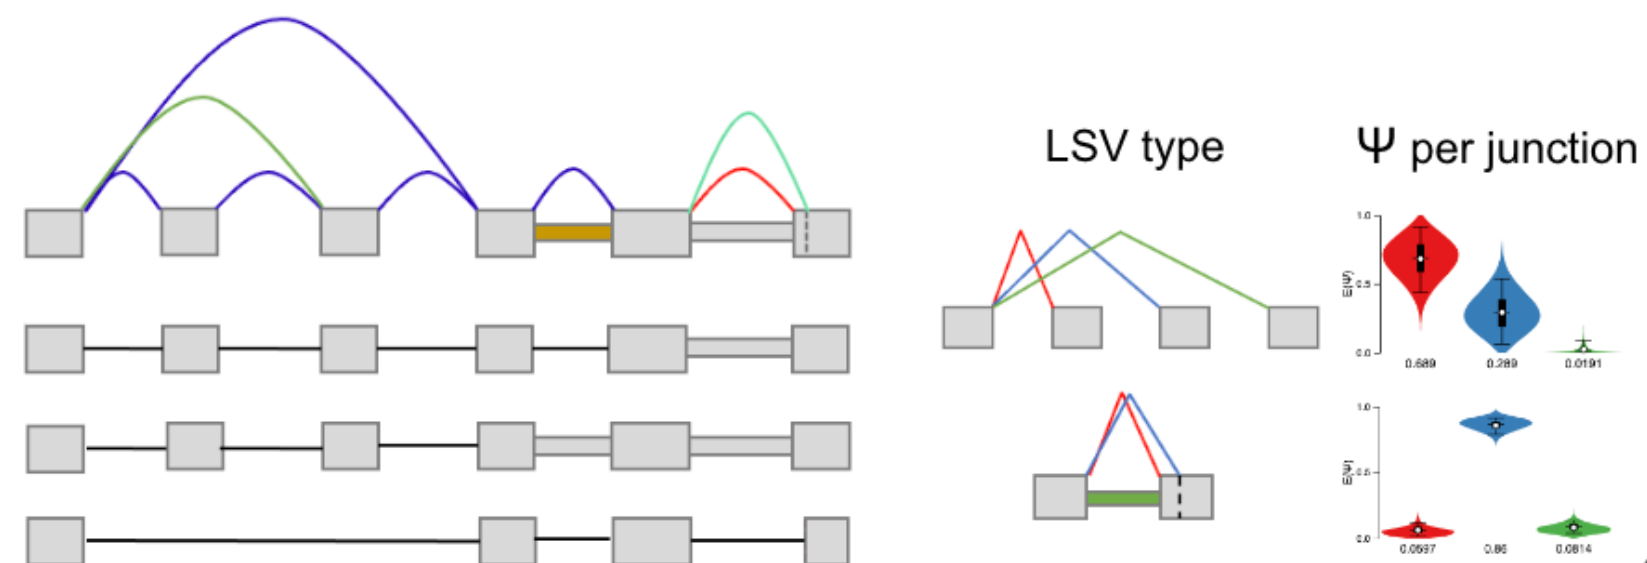

Supplement: Supplemental_code.zip [file Fig_1.pdf › Supplemental_code/figures/Fig_1/Fig_1.pdf]
