# Supplementary material for: Contrasting and combining transcriptome complexity captured by short and long RNA sequencing reads
Source: HighWire-hosted journal article supplement (doi:10.1101/gr.278659.123), 2024-09-25

A

|                    | MAJIQ<br>(short-read) | LR algorithm<br>(long-read) | Annotation |
|--------------------|-----------------------|-----------------------------|------------|
| All                | ✓                     | ✓                           | ✓          |
| Both de-novo       | ✓                     | ✓                           | ✗          |
| MAJIQ de-novo      | ✓                     | ✗                           | ✗          |
| MAJIQ / Annotation | ✓                     | ✗                           | ✓          |
| LR de-novo         | ✗                     | ✓                           | ✗          |
| LR / Annotation    | ✗                     | ✓                           | ✓          |

C

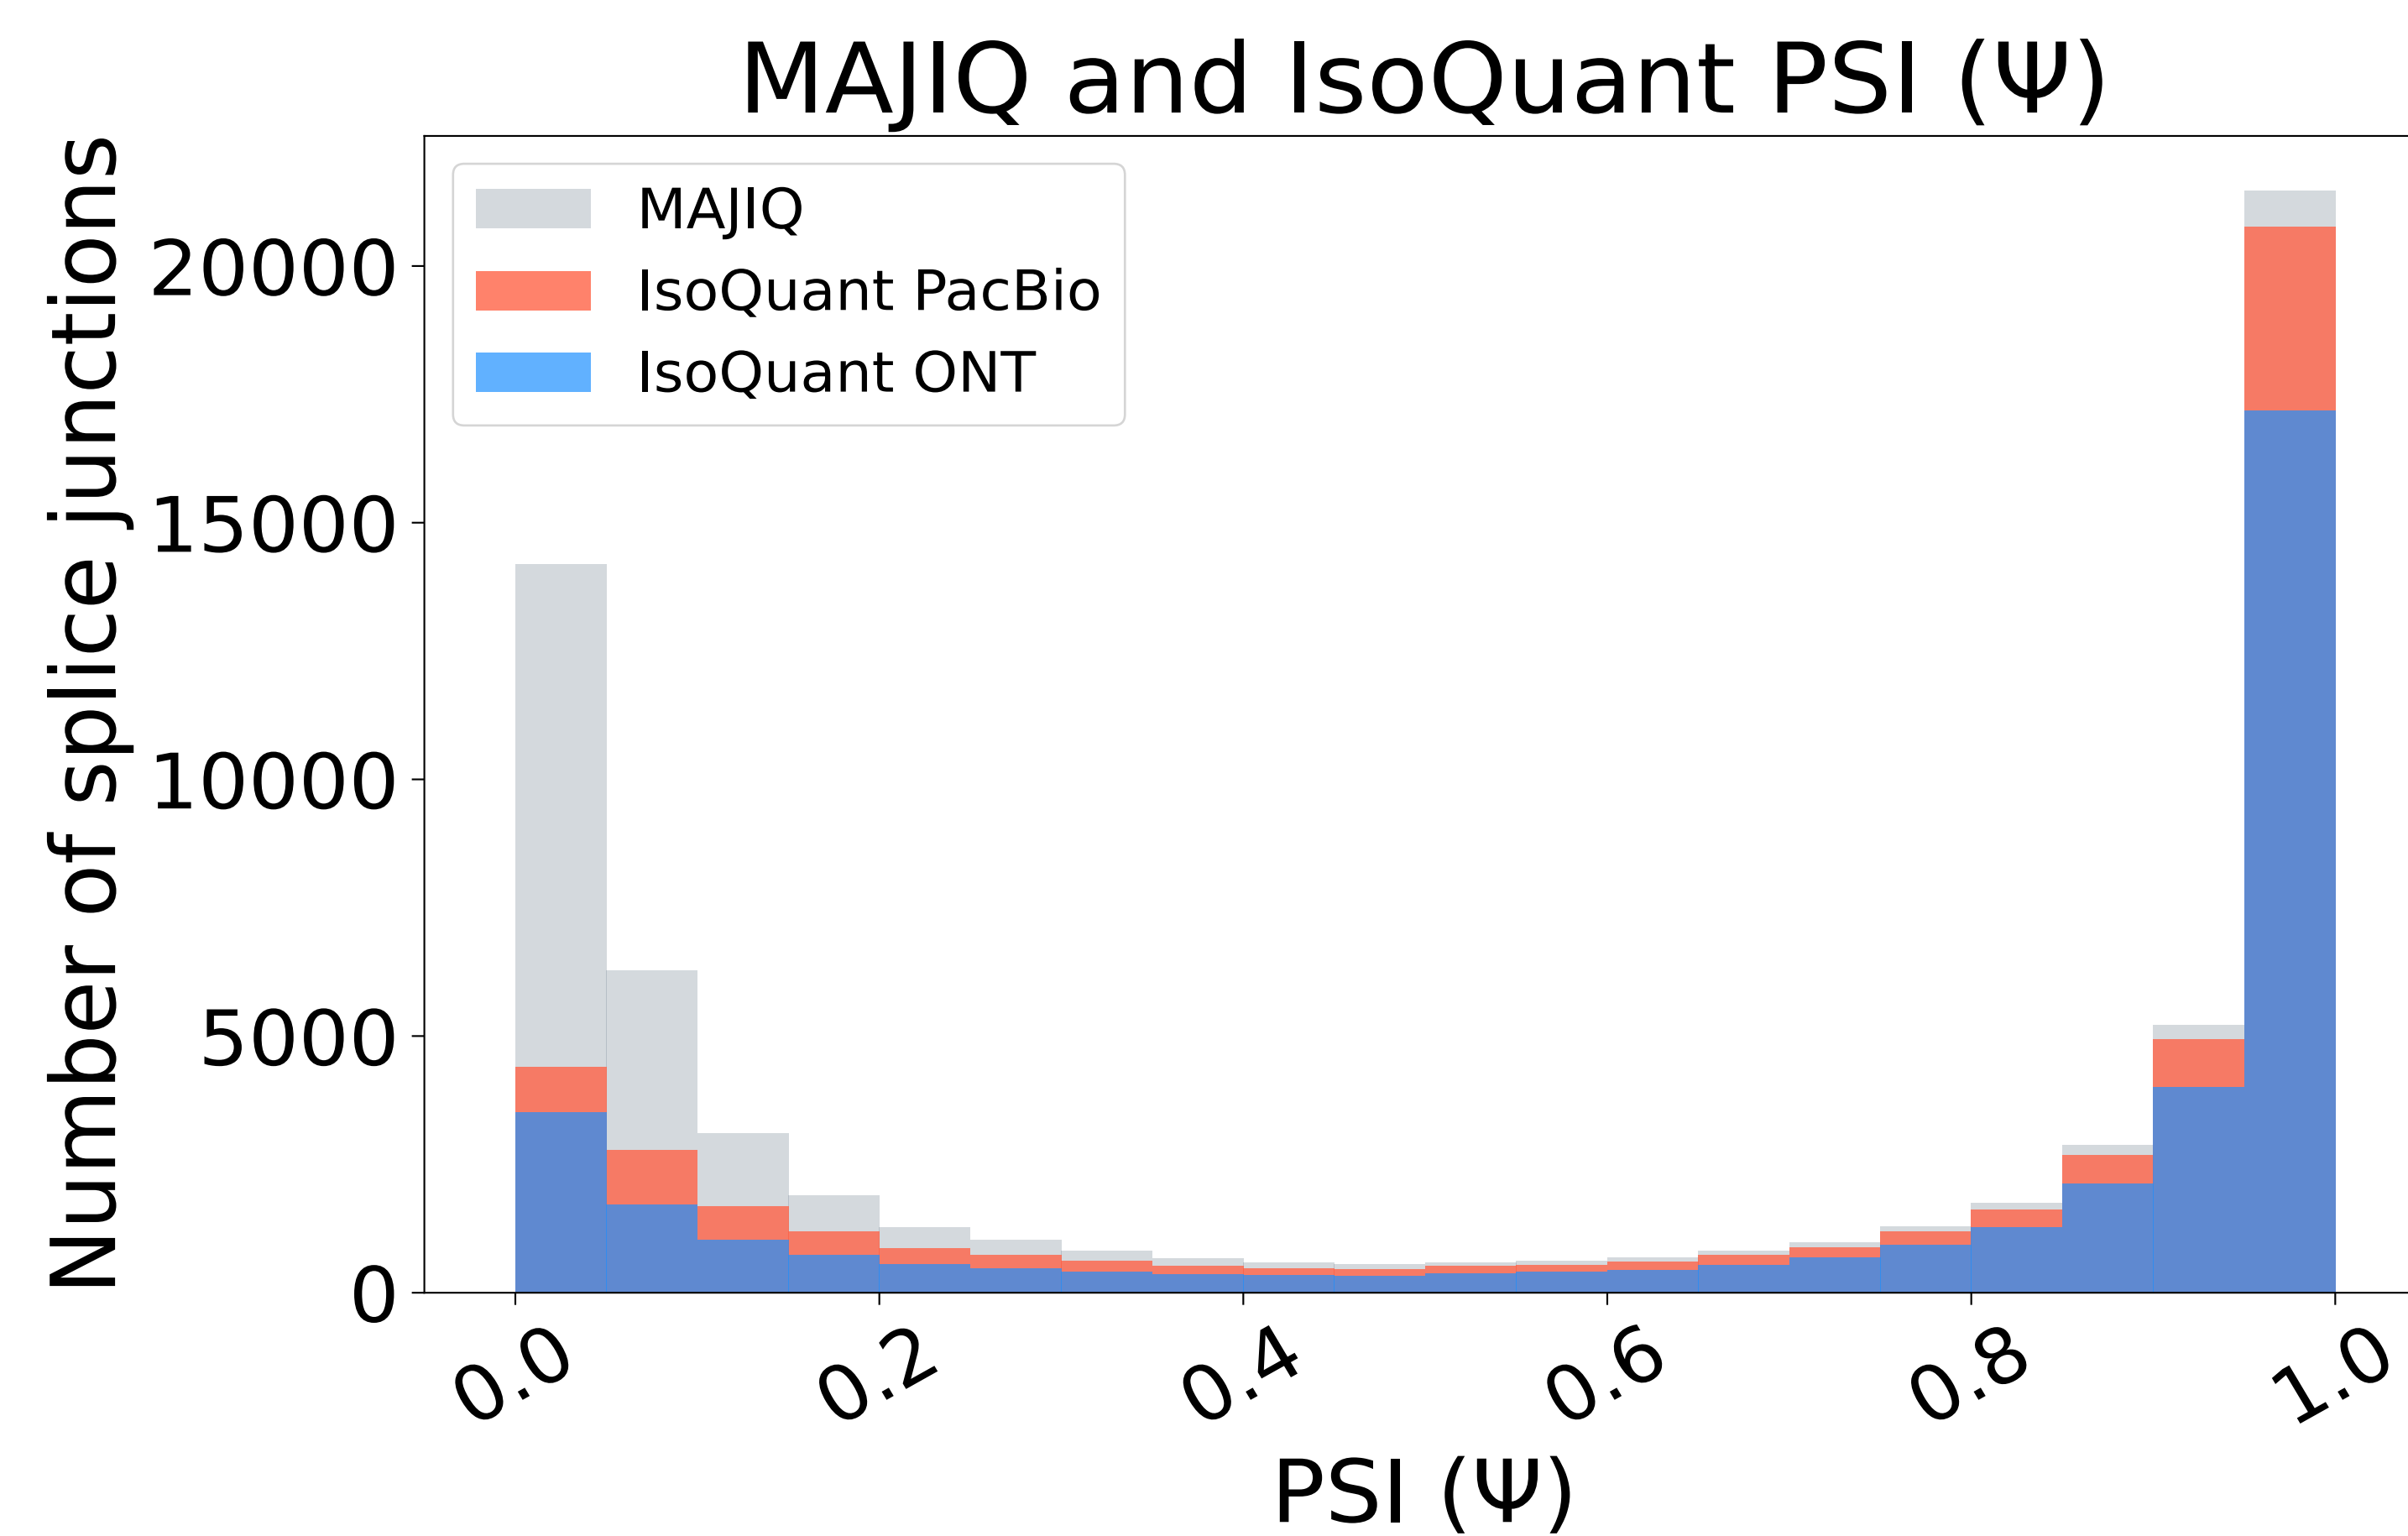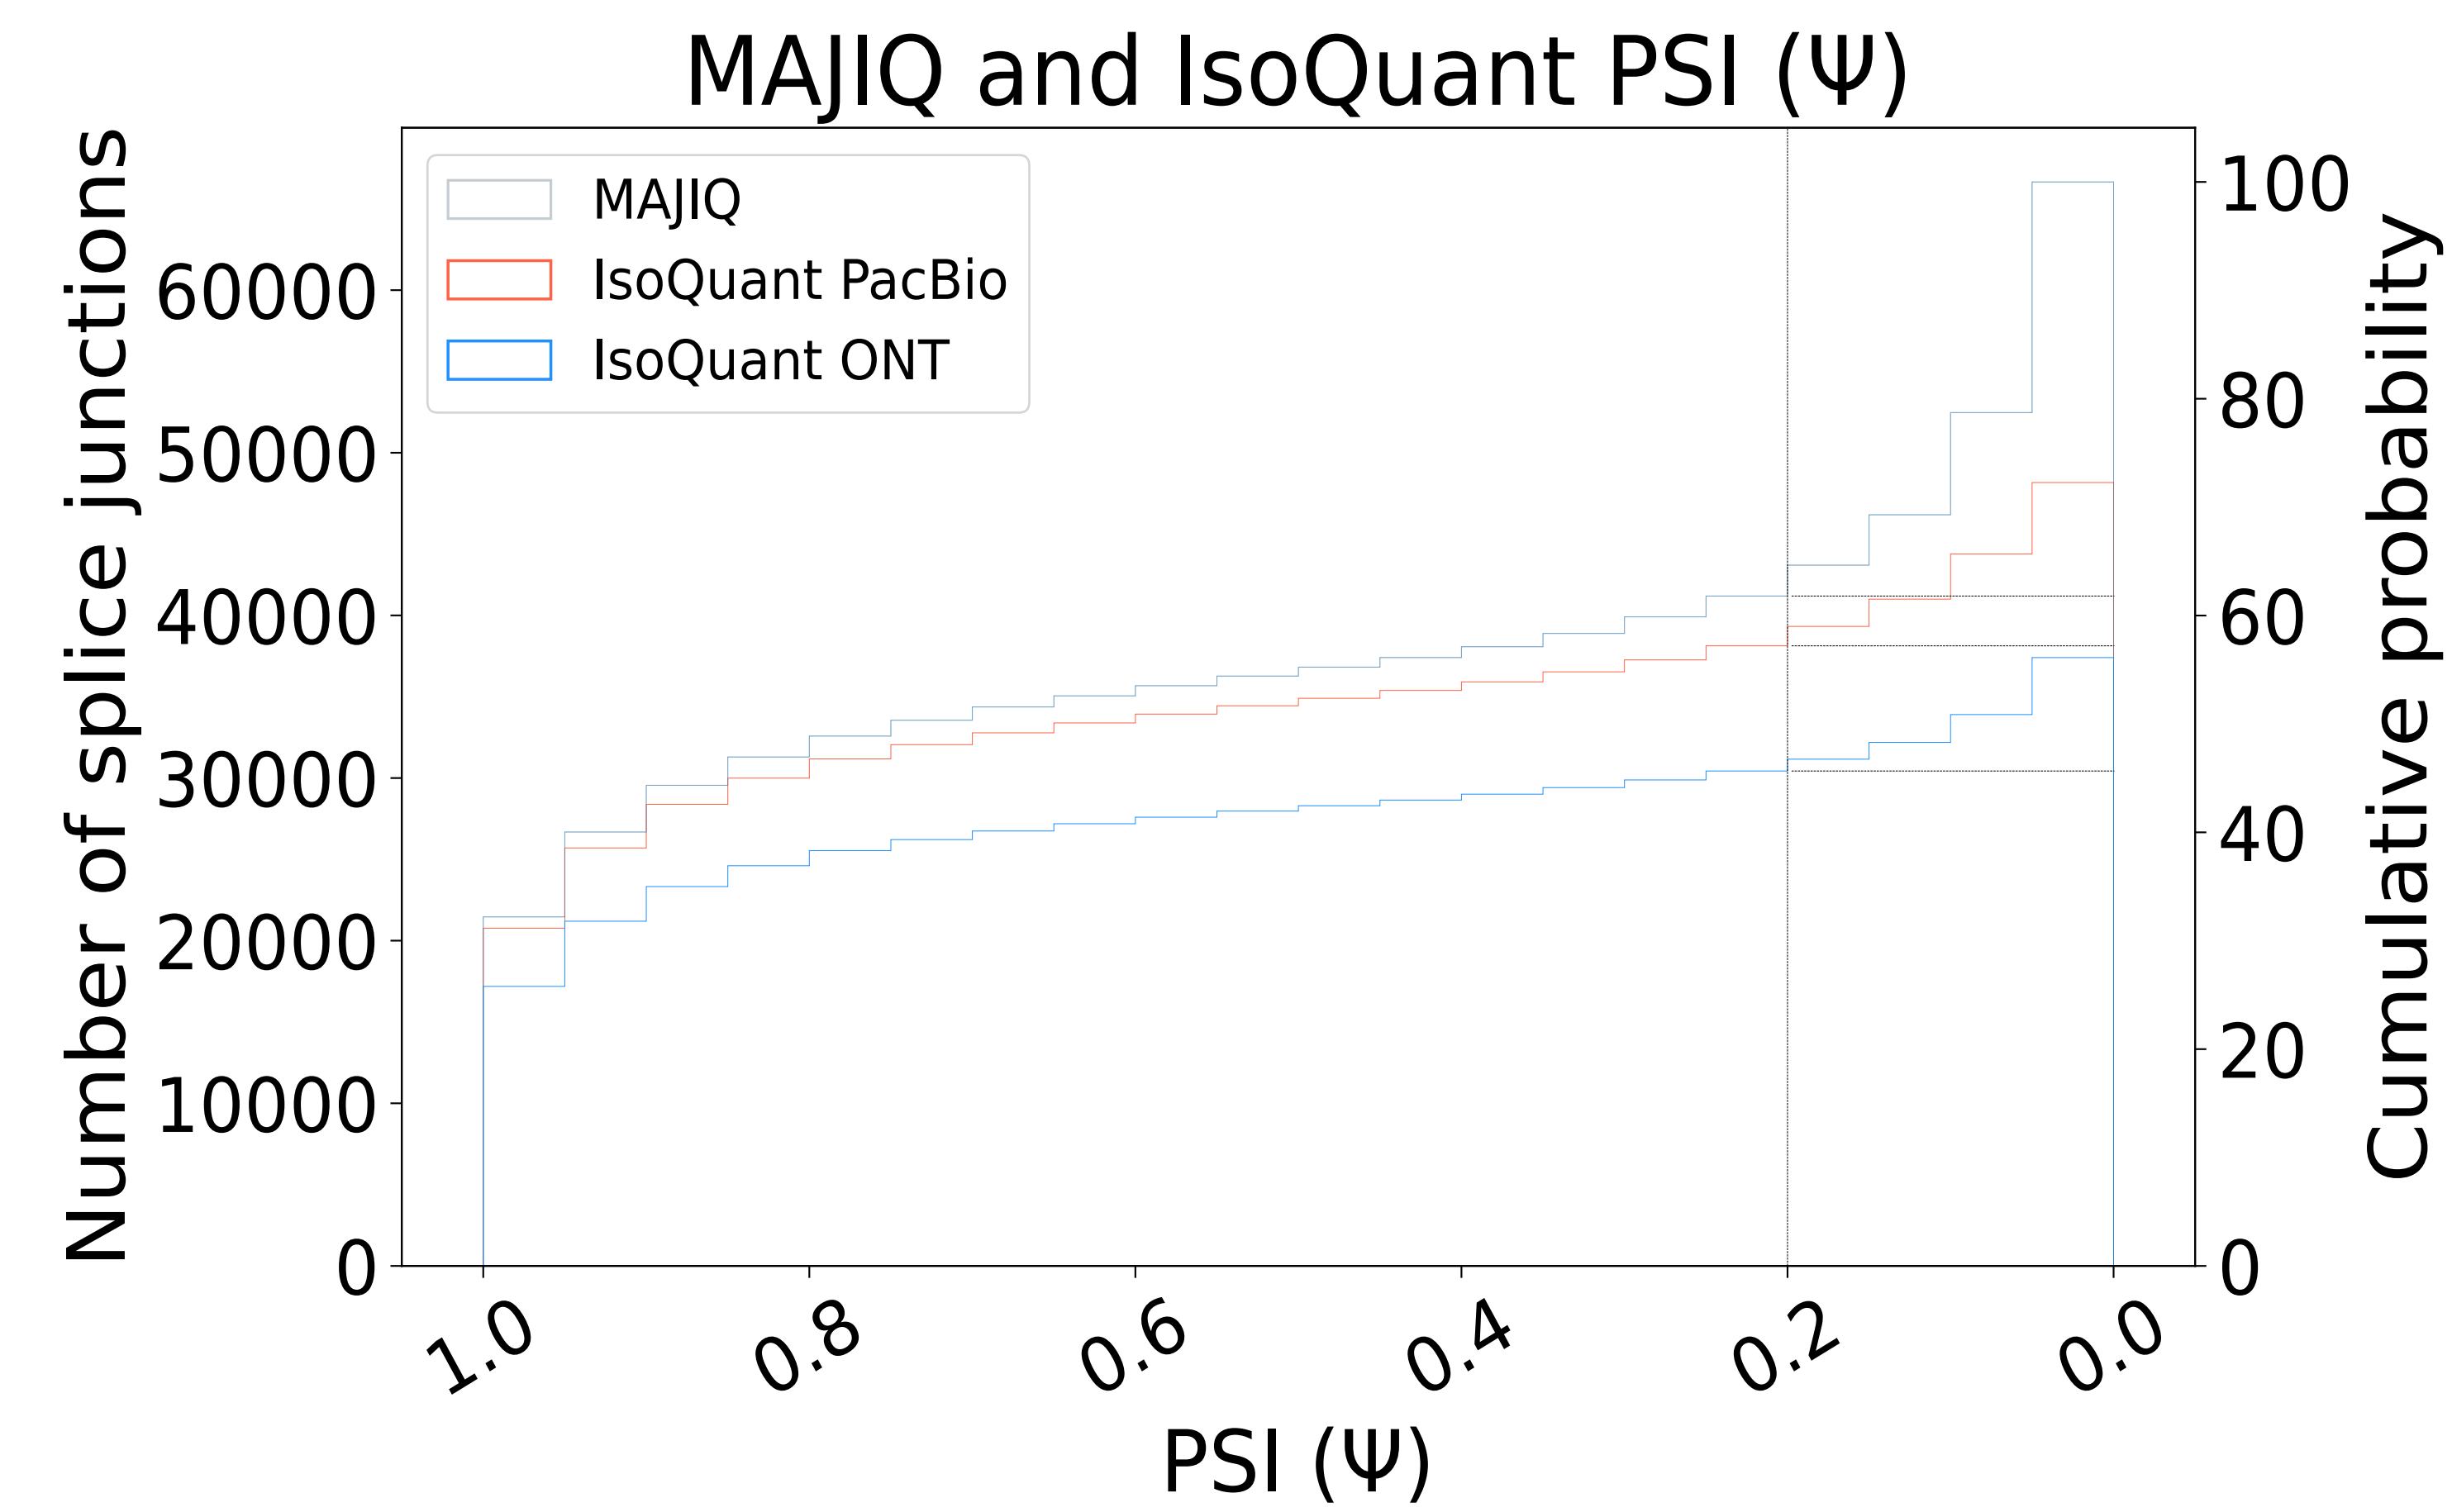

B

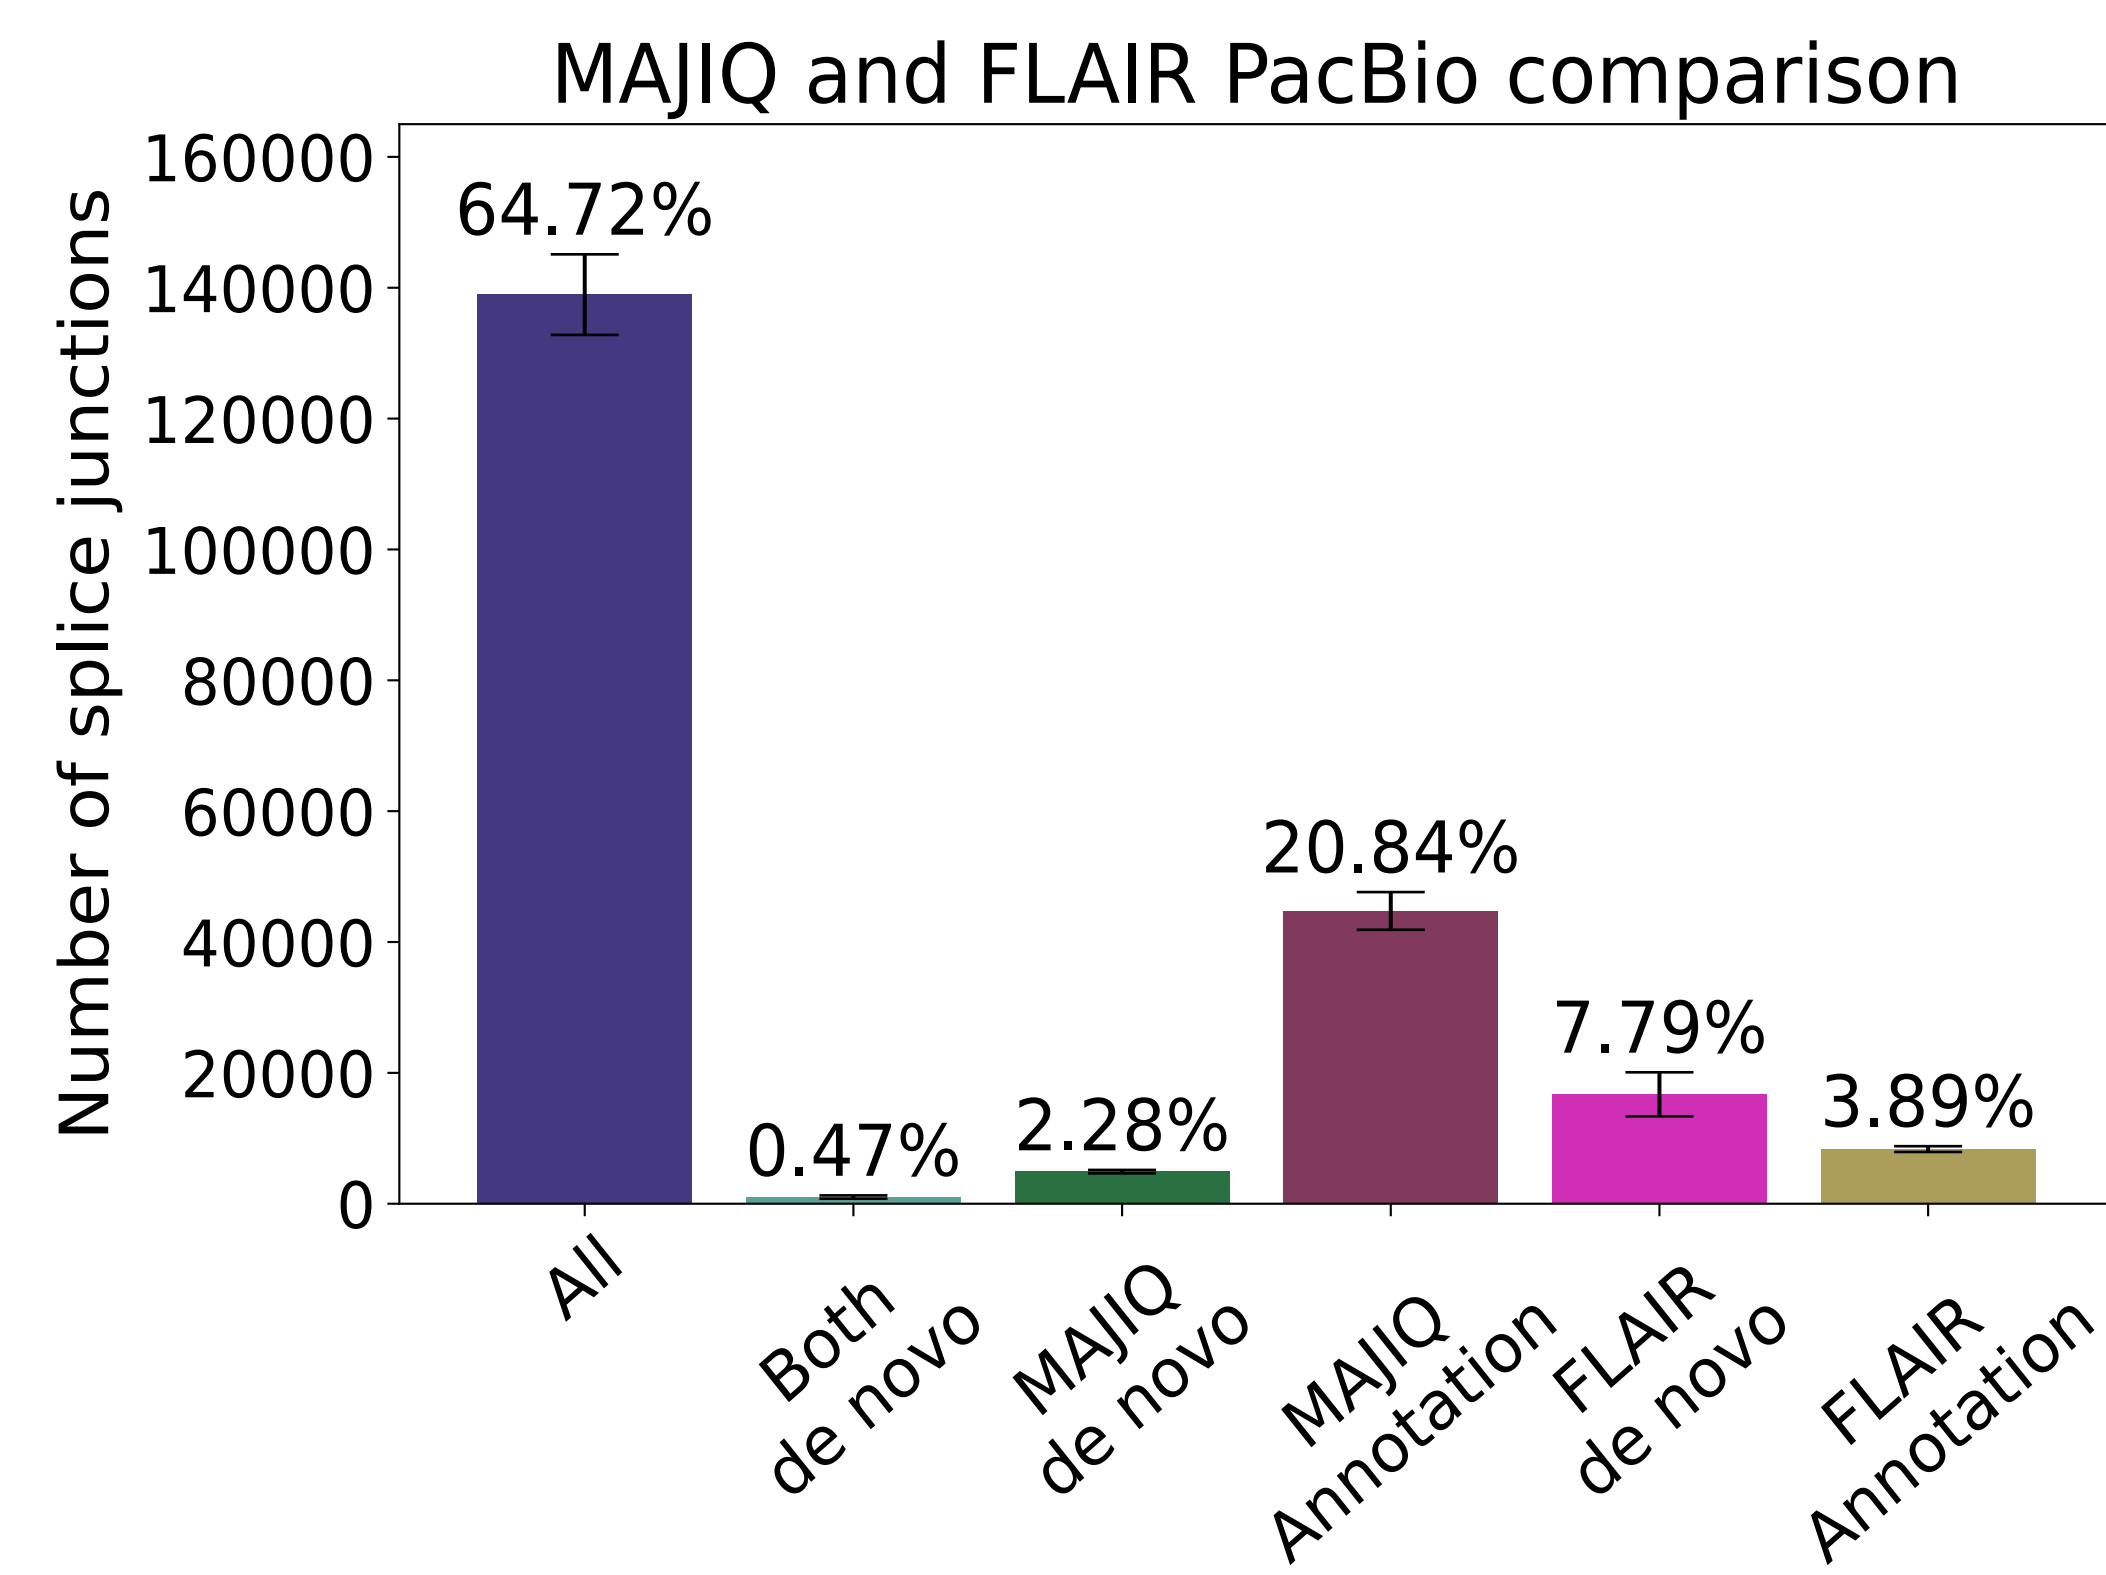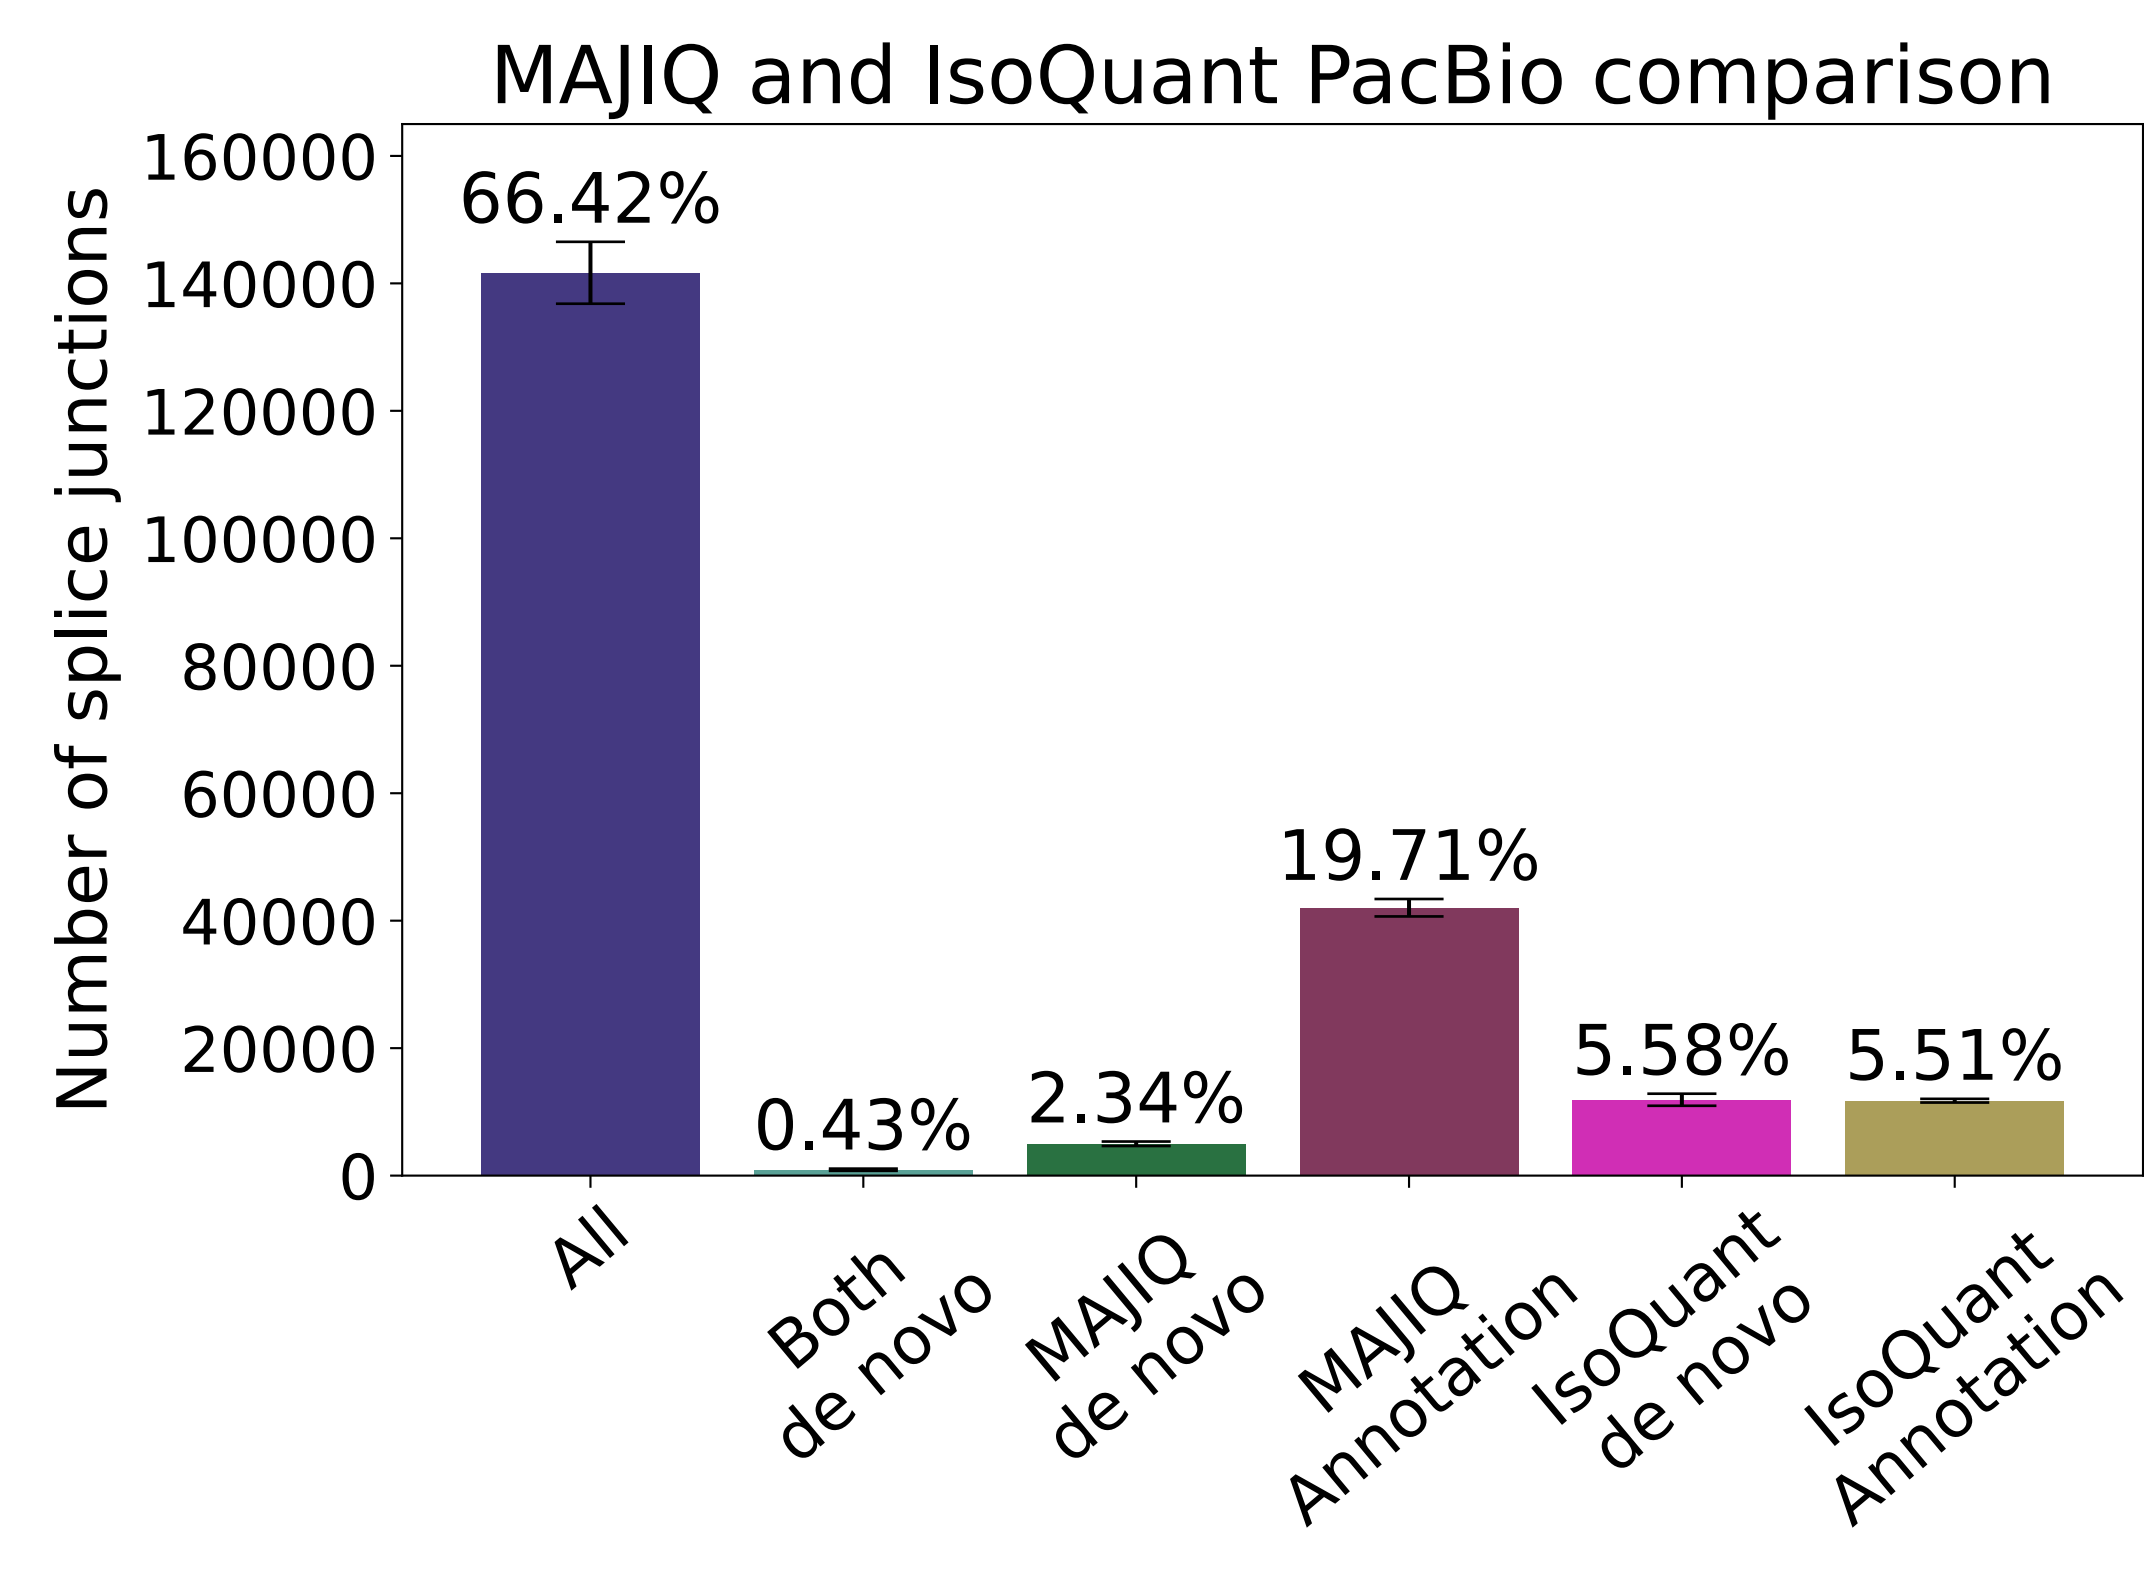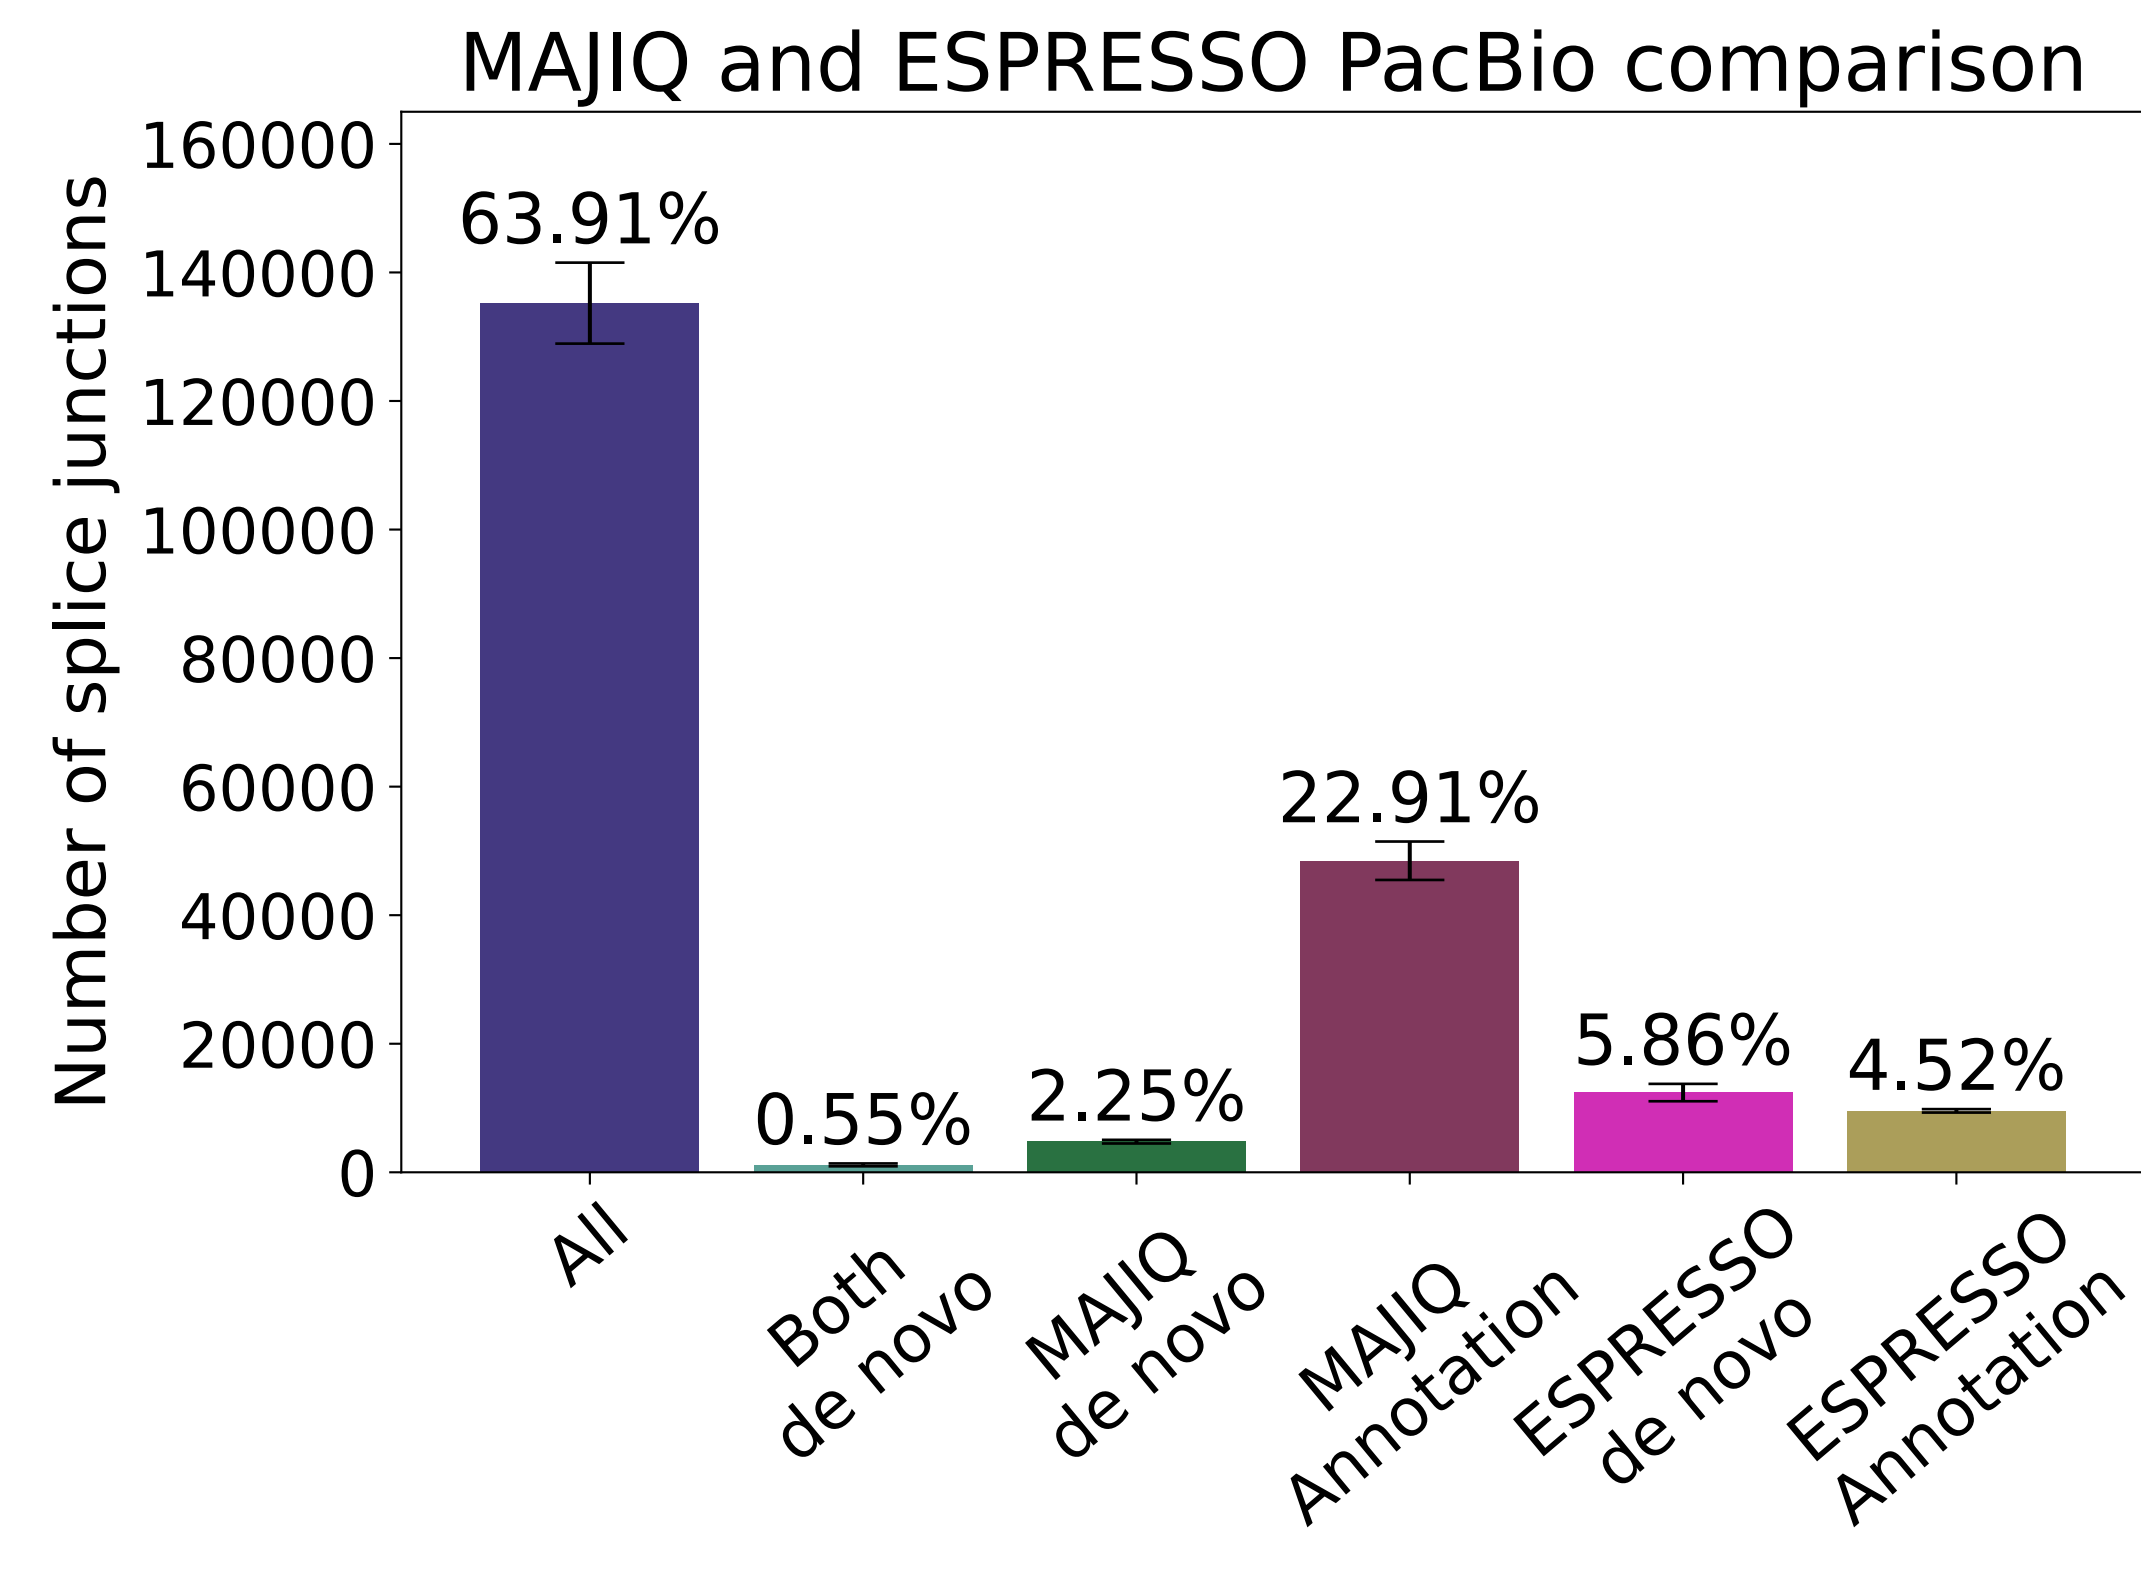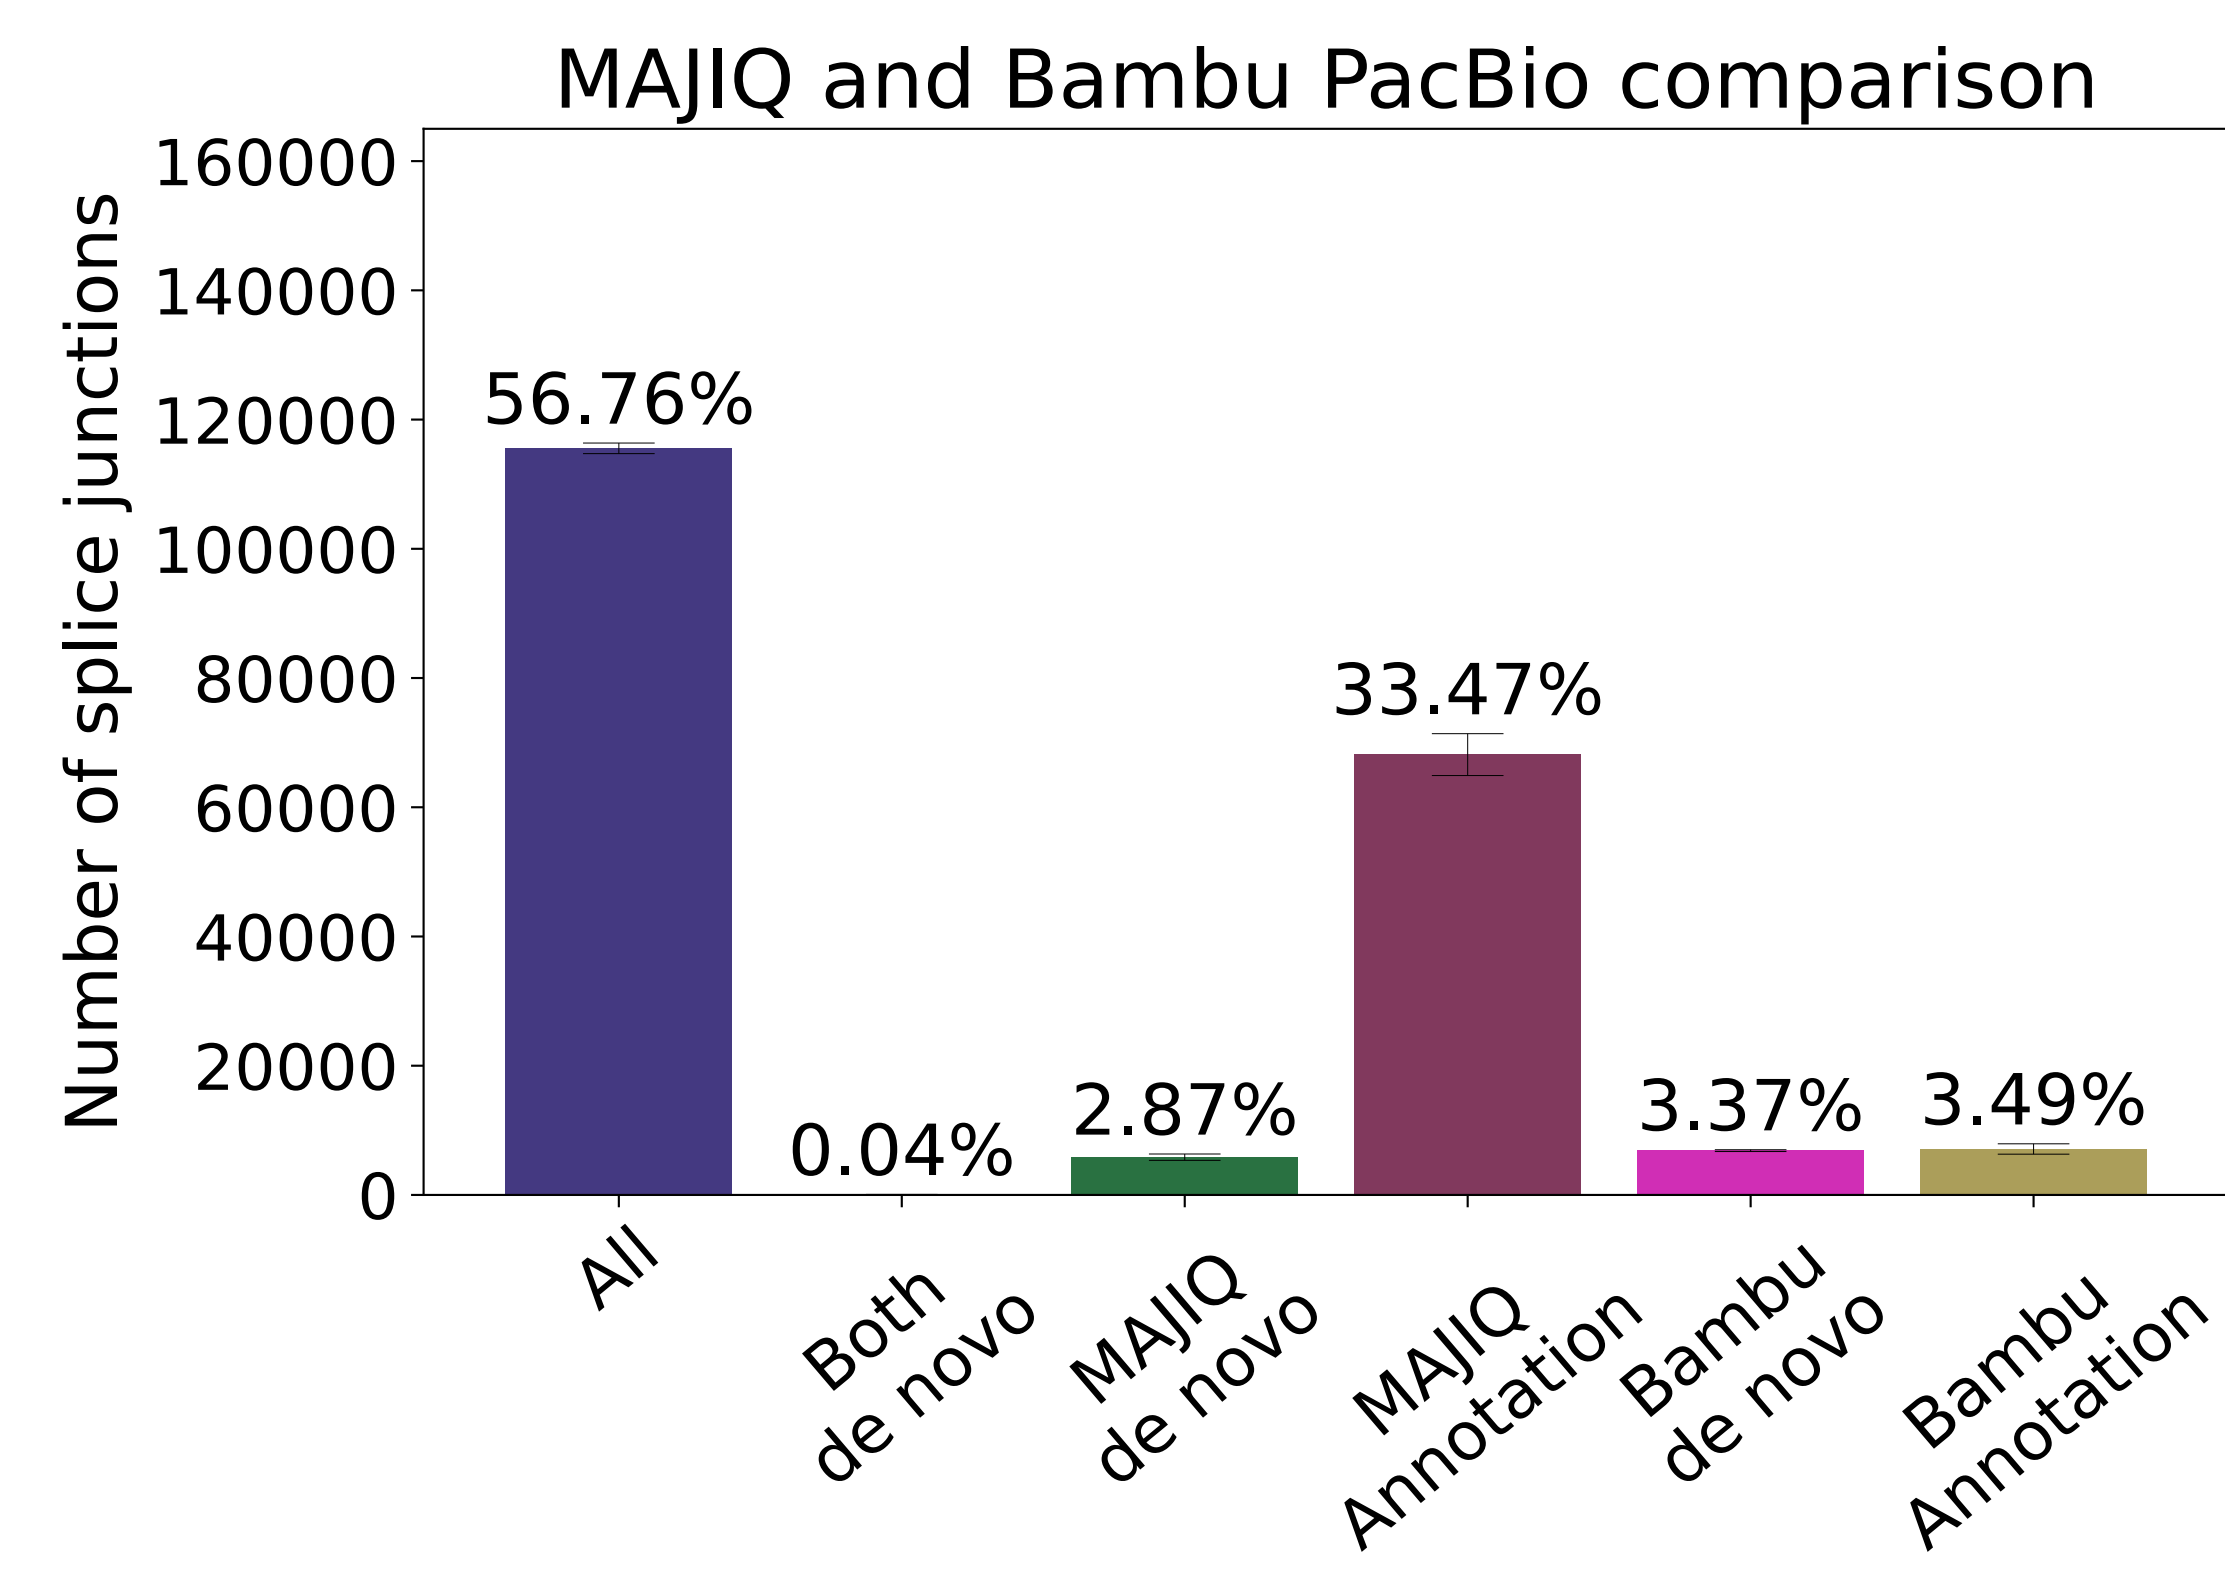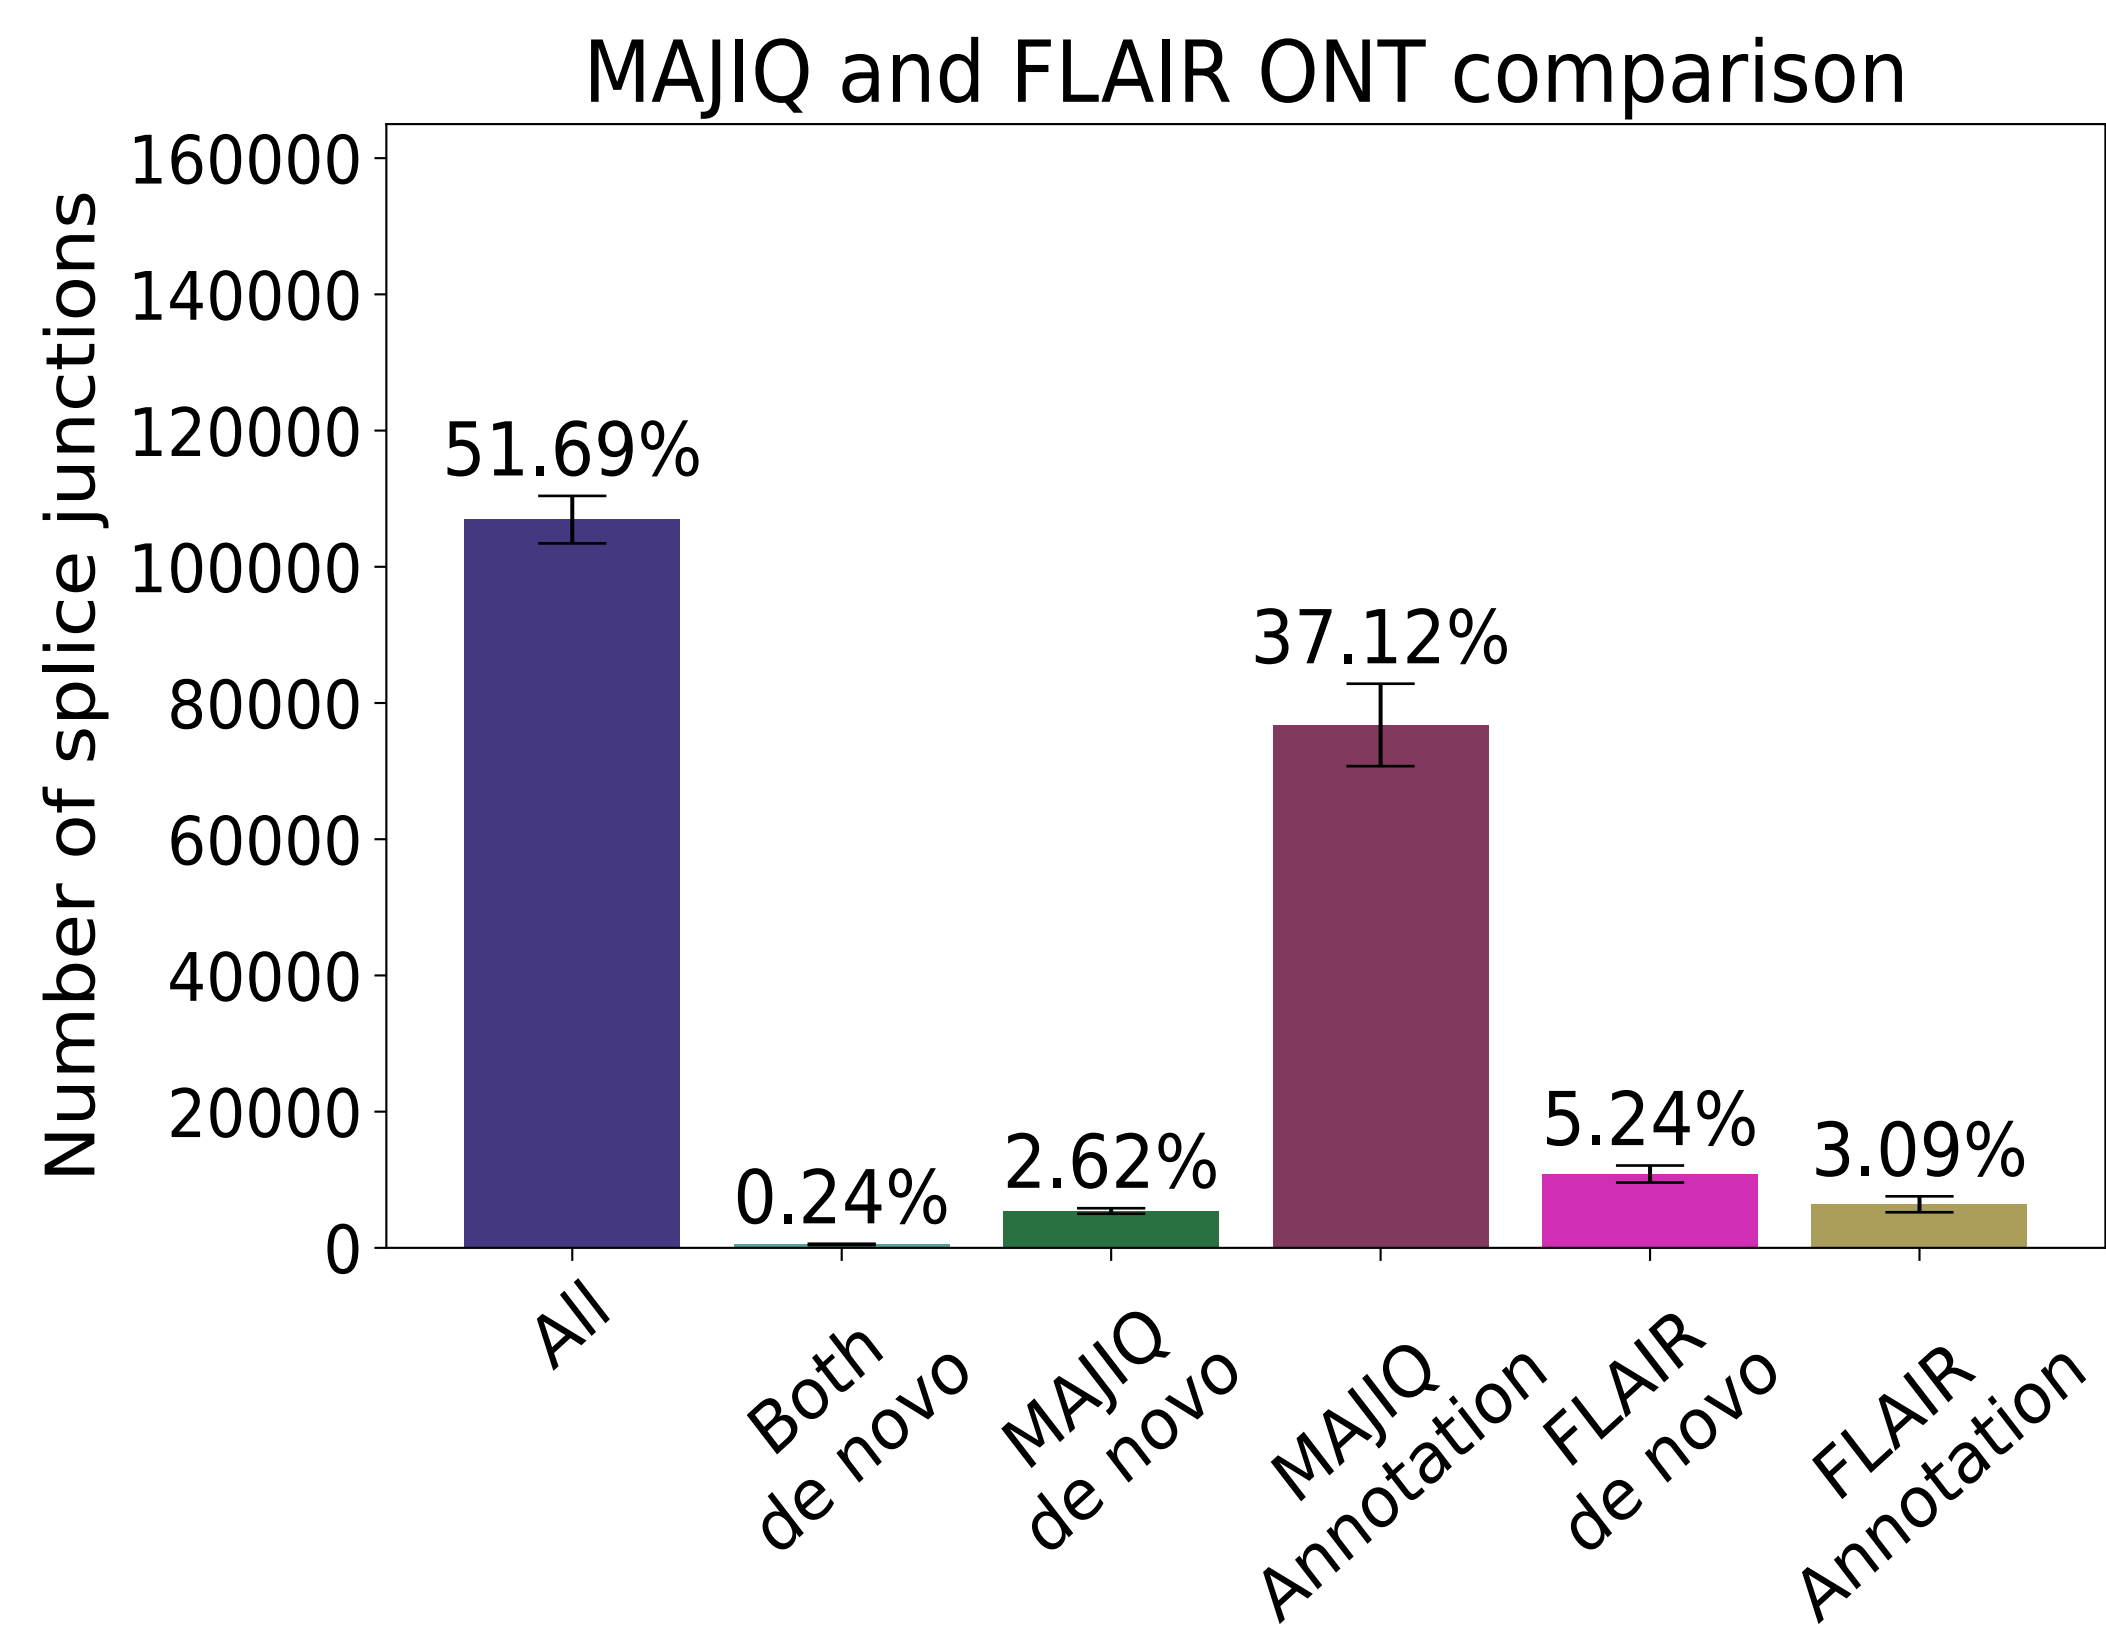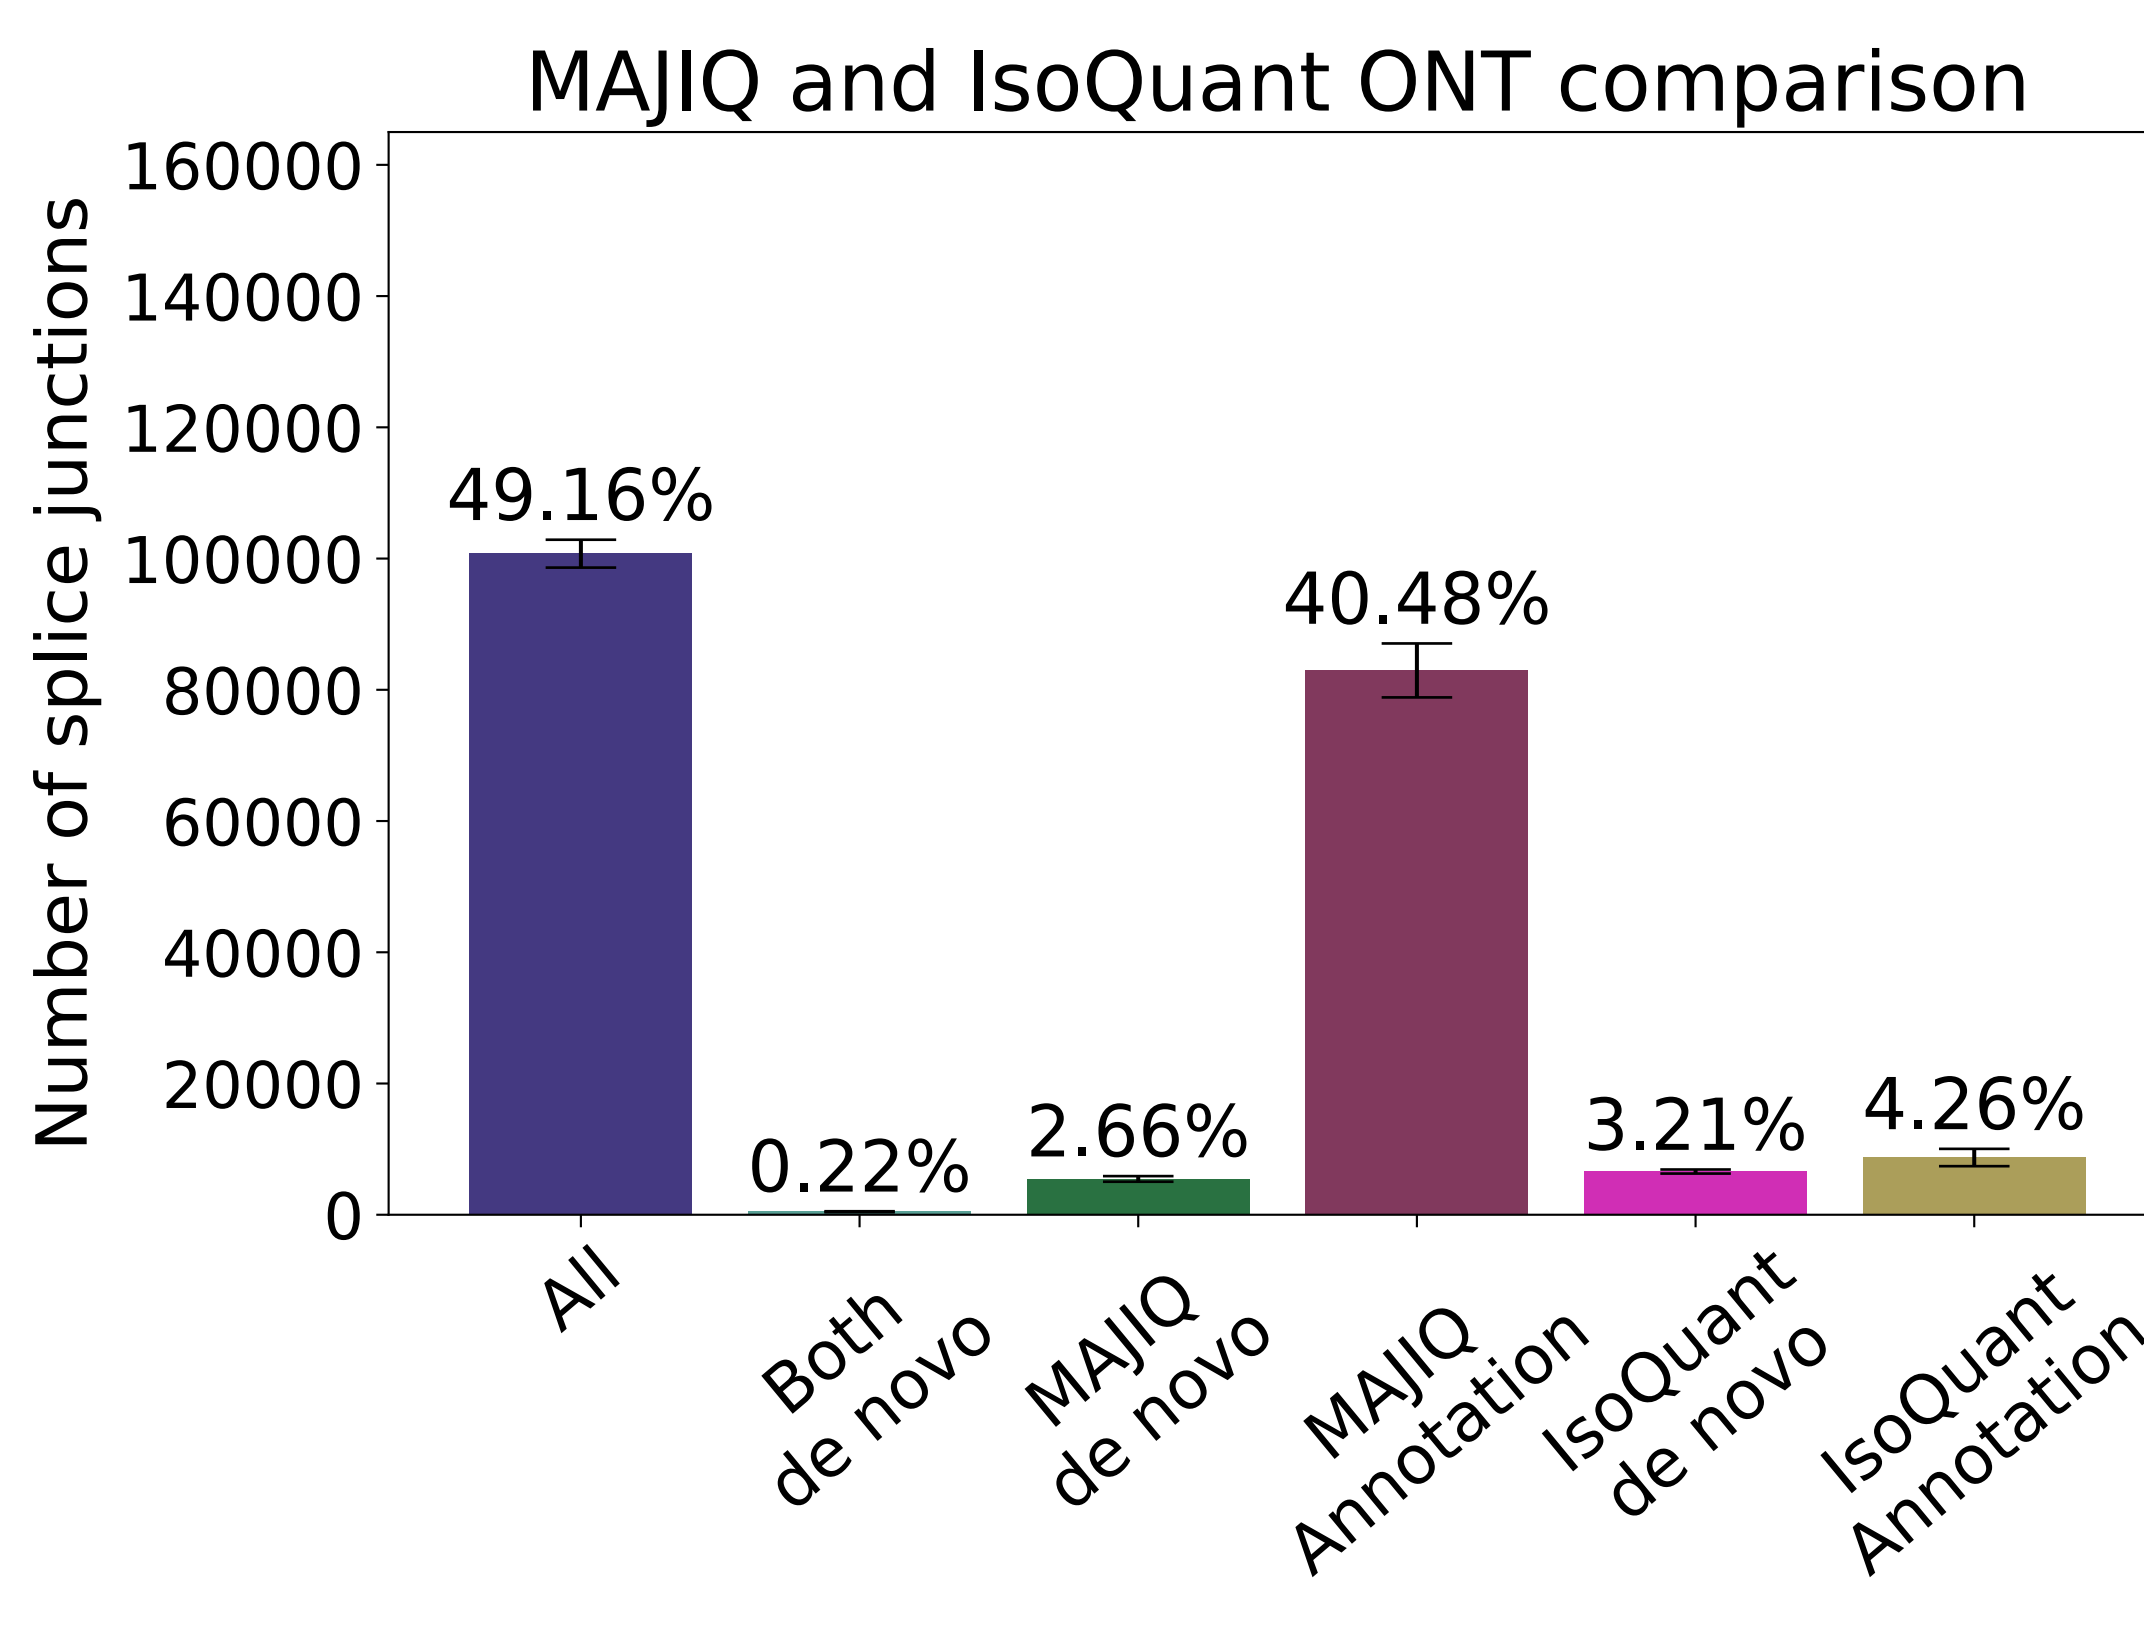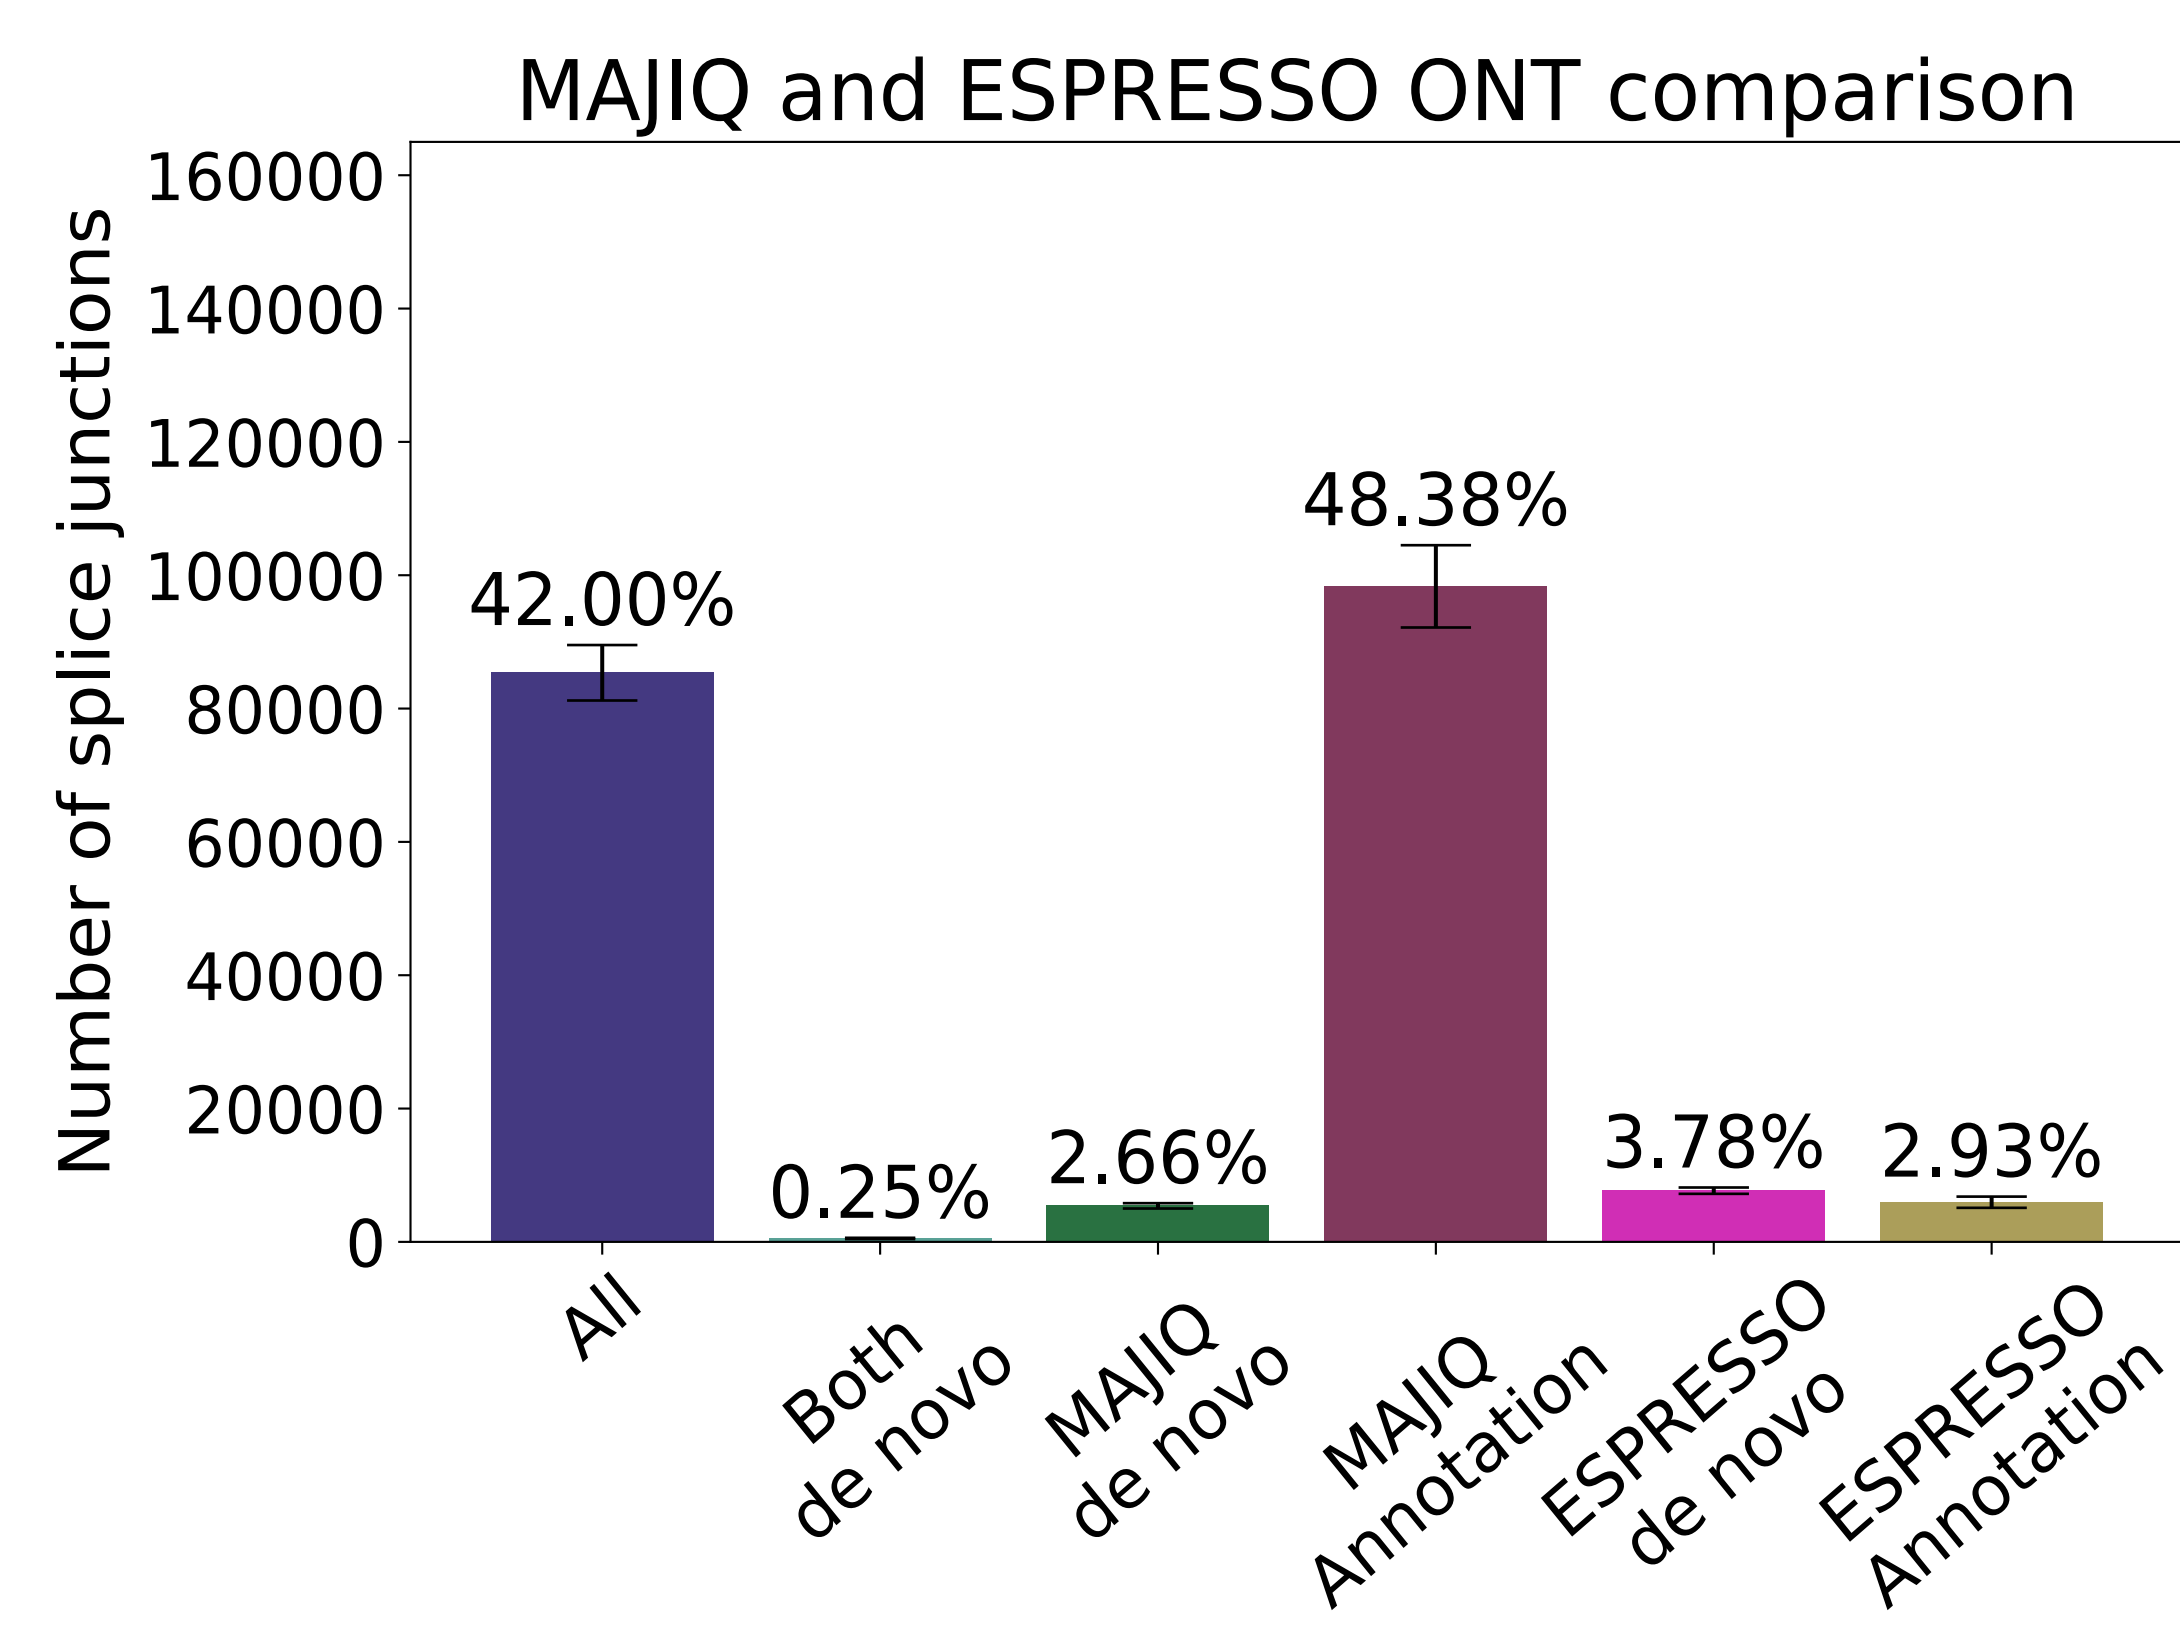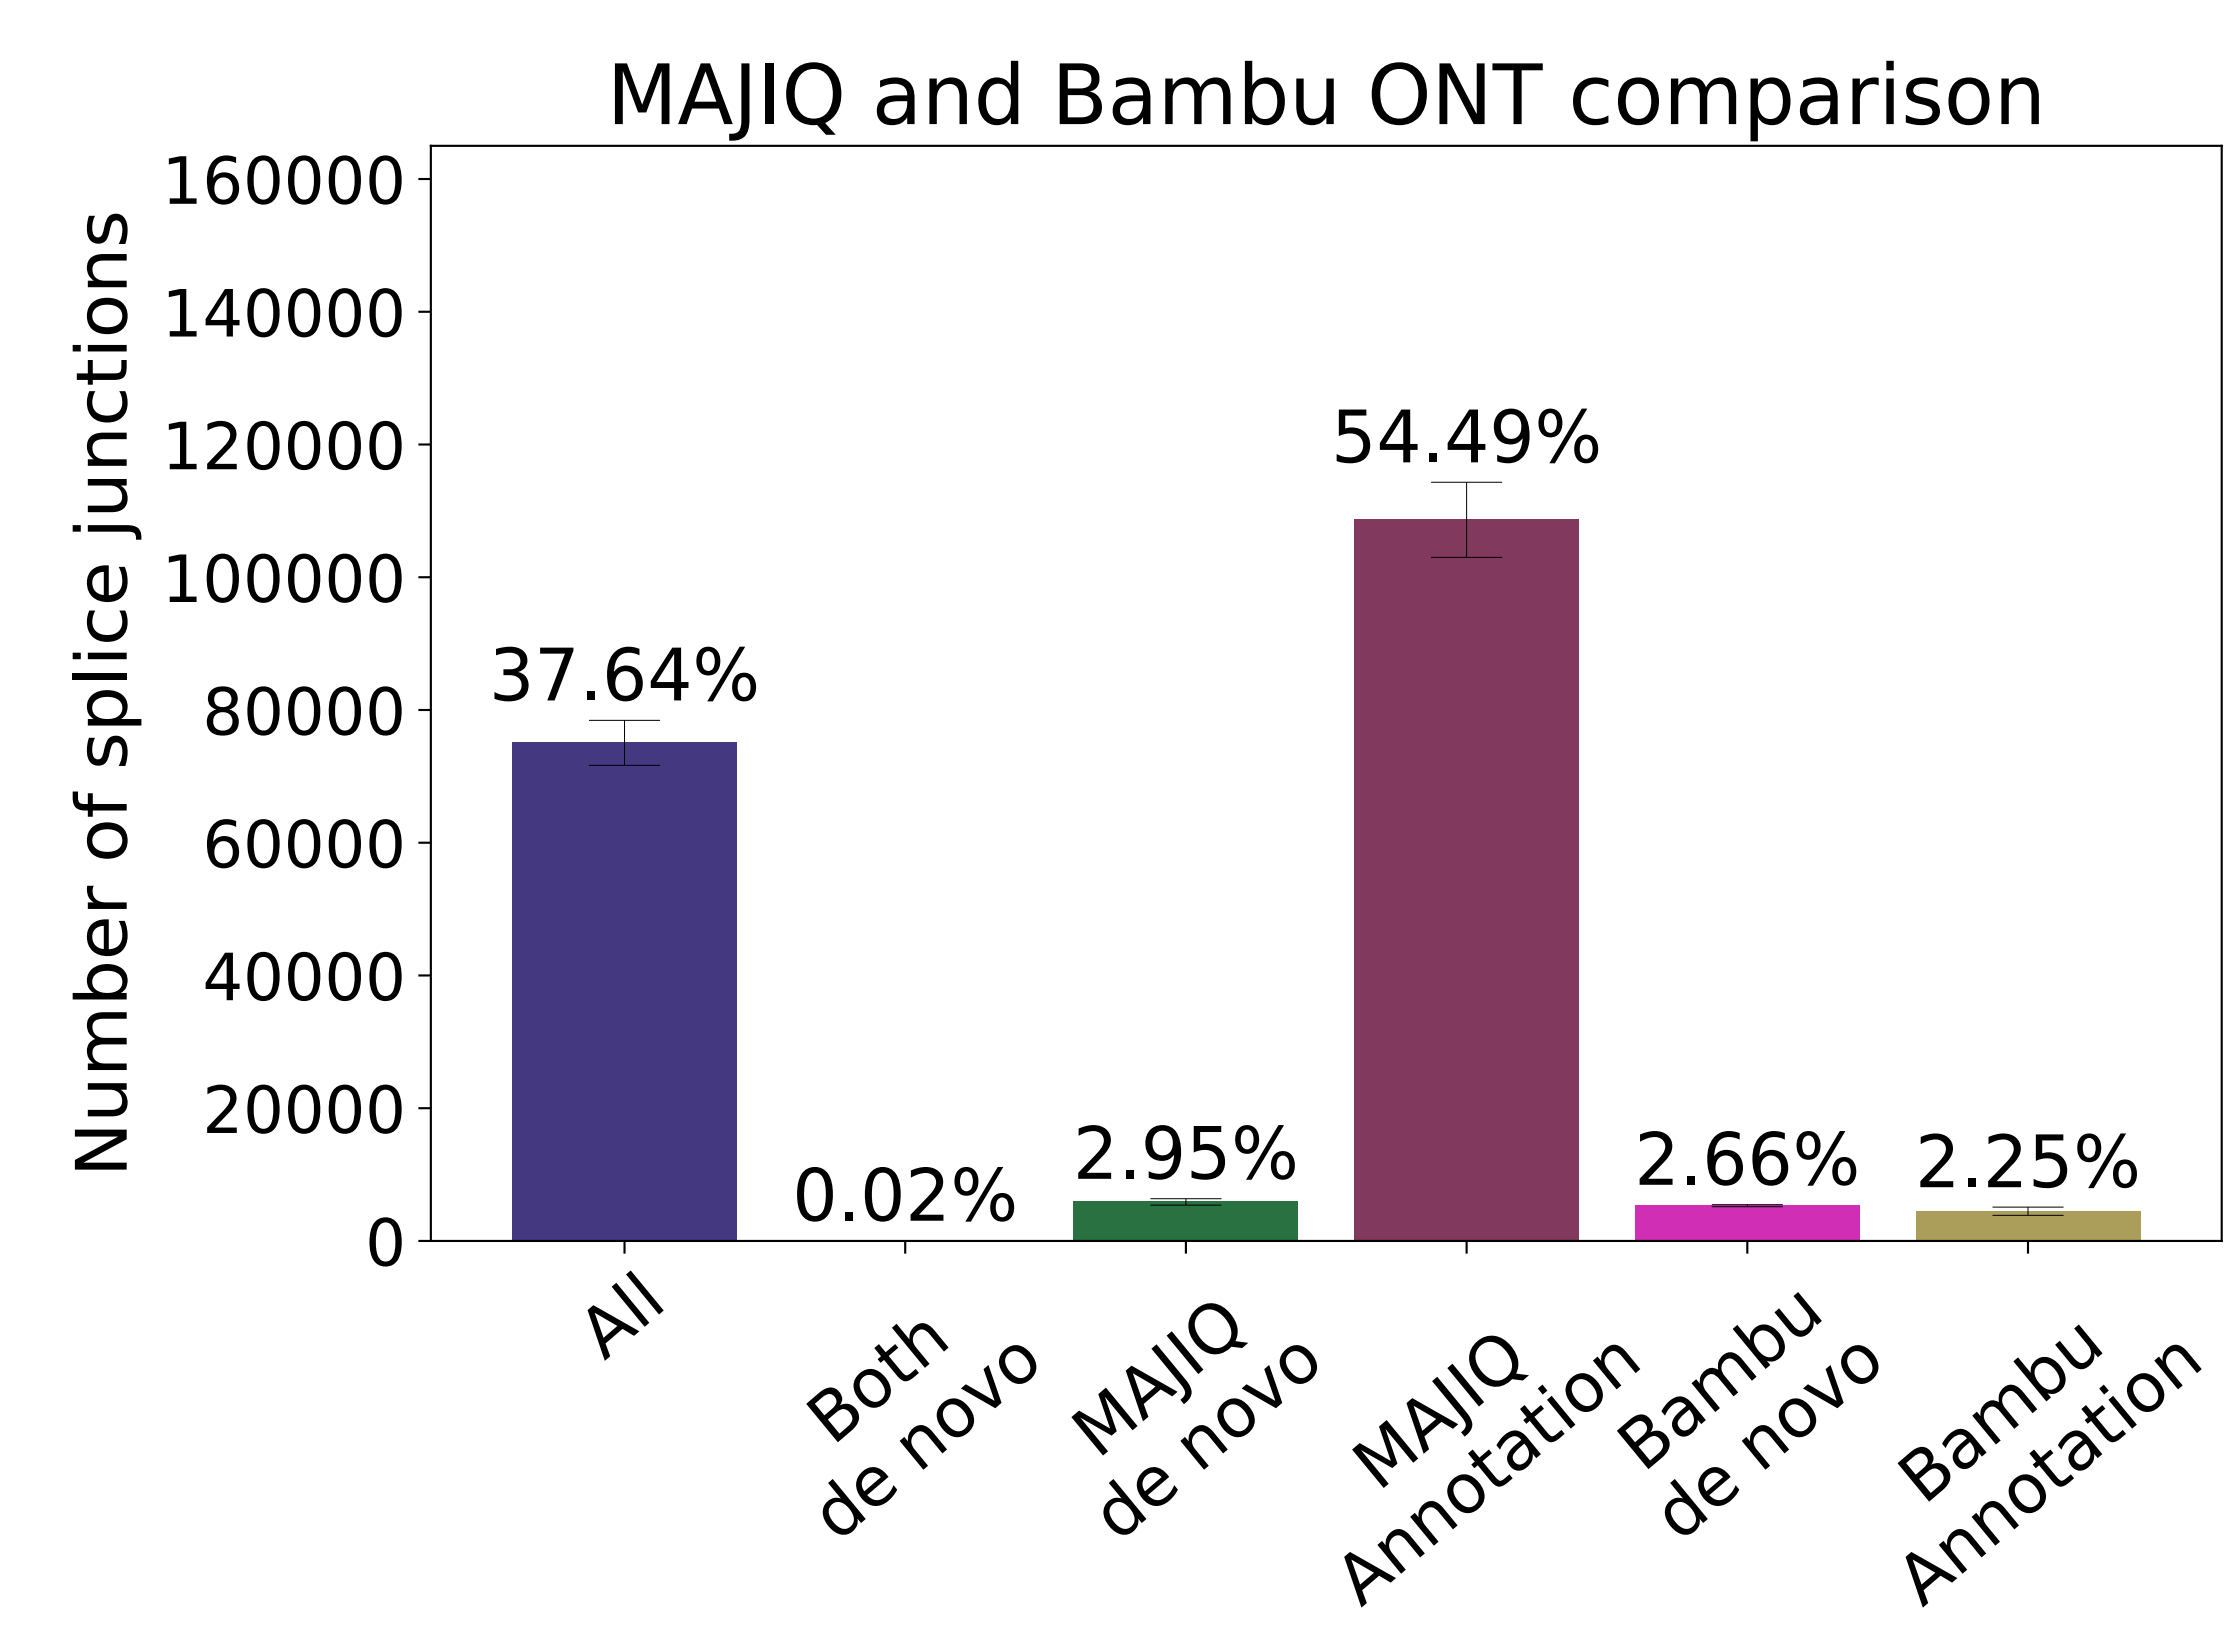

Supplement: Supplemental_code.zip [file Fig_2.pdf › Supplemental_code/figures/Fig_2/Fig_2.pdf]
