# Supplementary material for: Contrasting and combining transcriptome complexity captured by short and long RNA sequencing reads
Source: HighWire-hosted journal article supplement (doi:10.1101/gr.278659.123), 2024-09-25

A

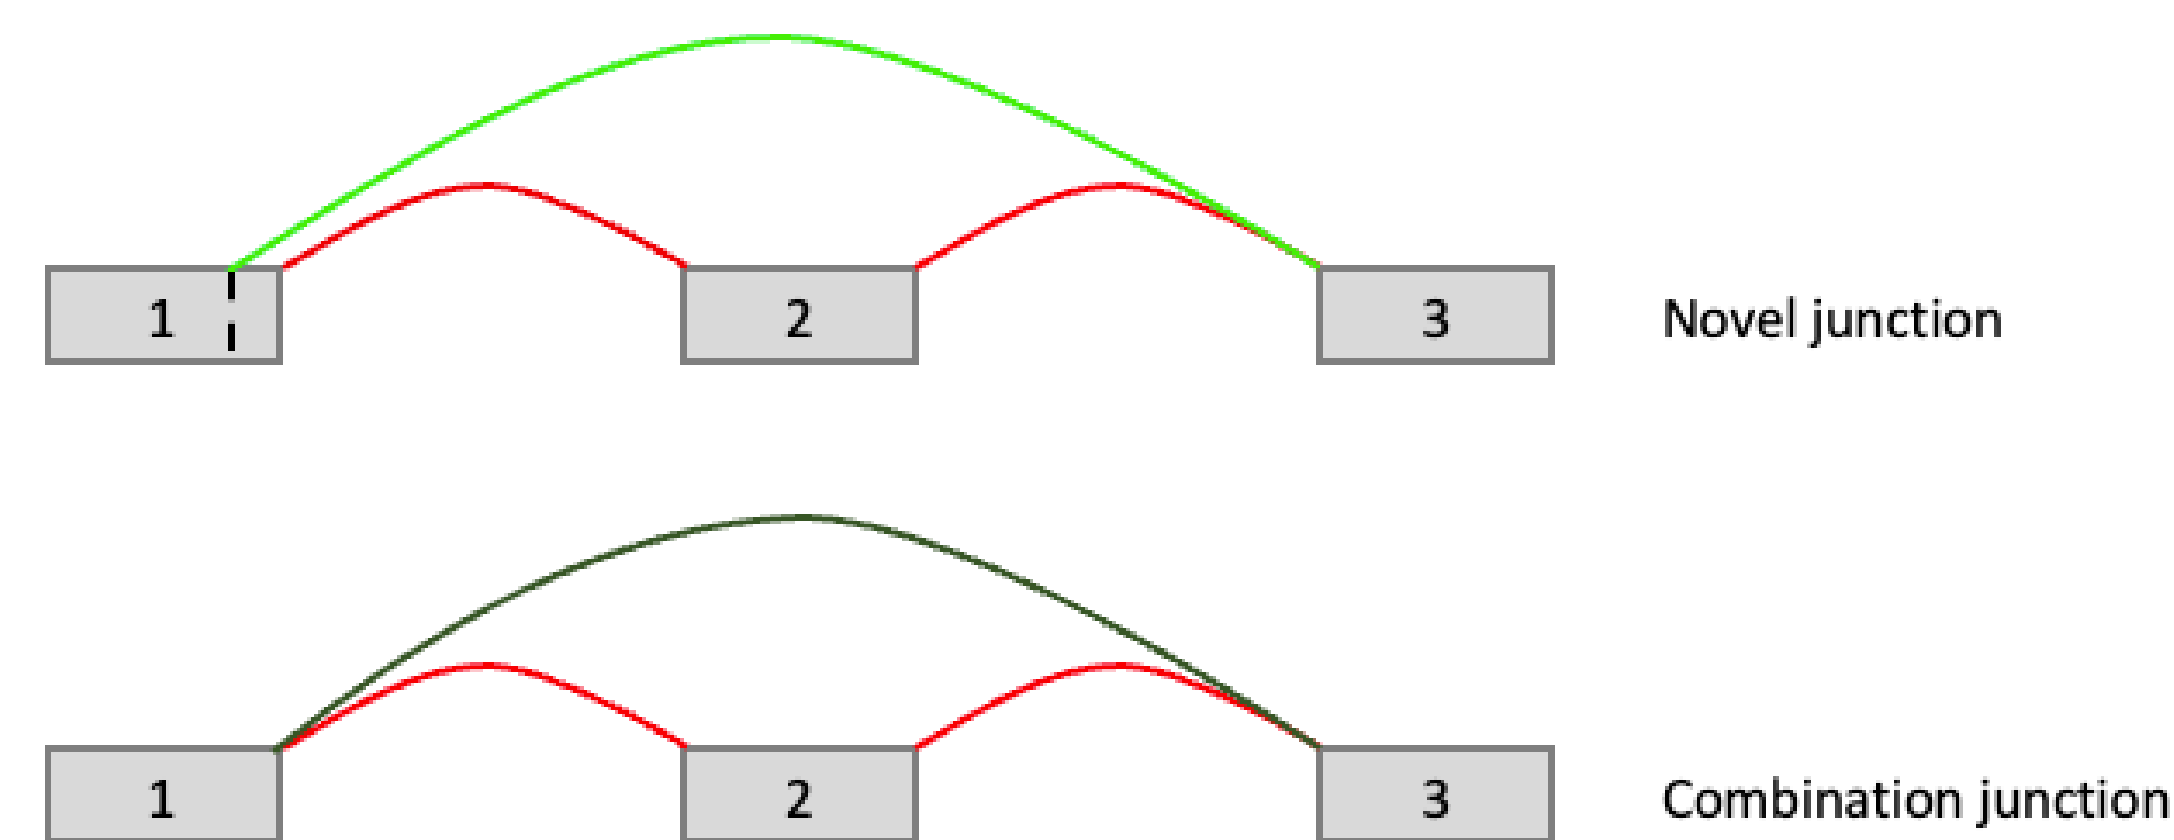

IsoQuant PacBio

IsoQuant ONT

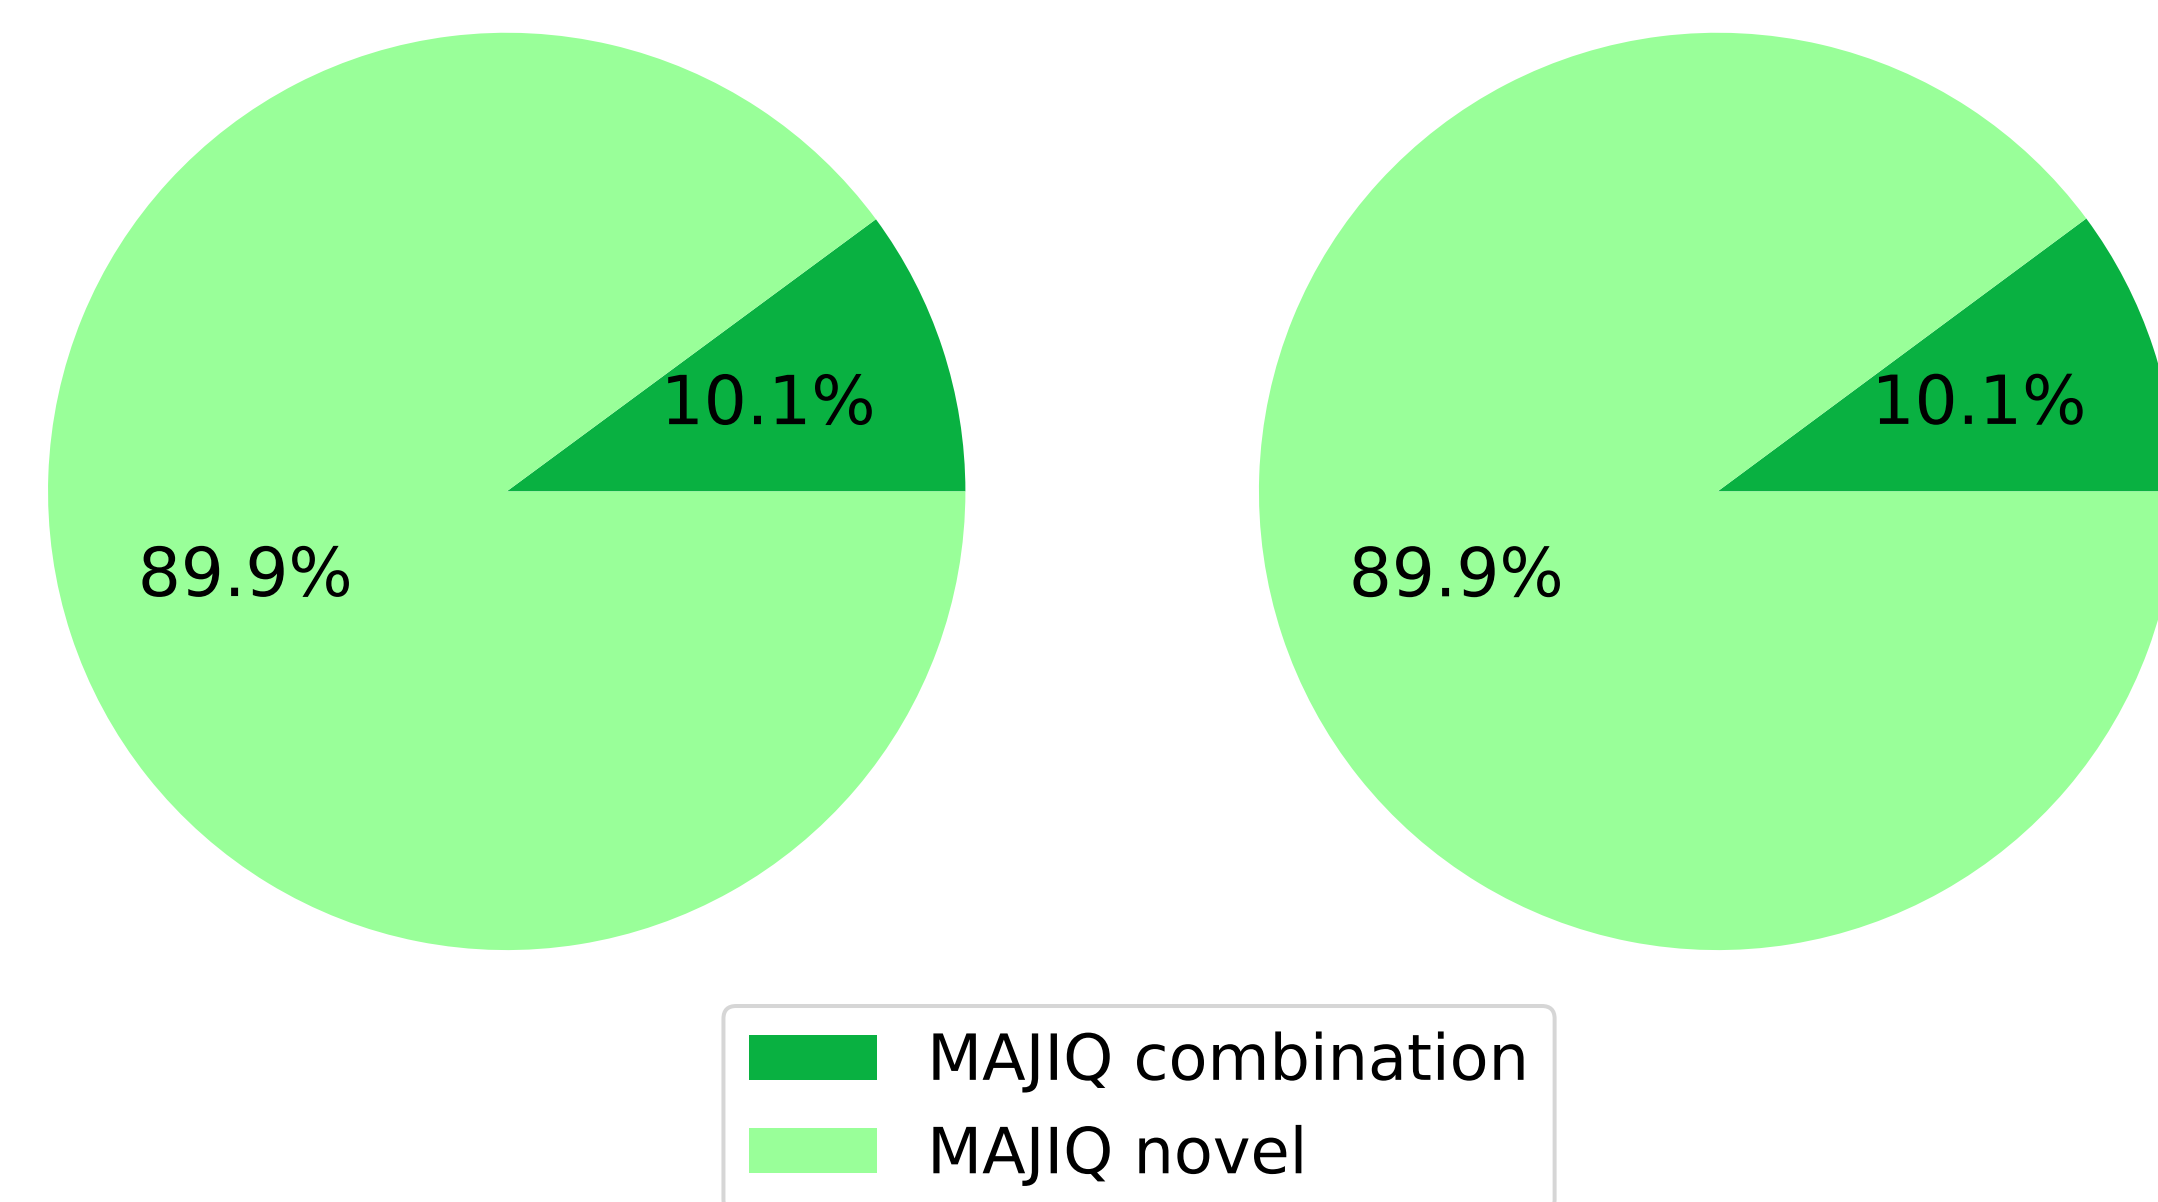

D

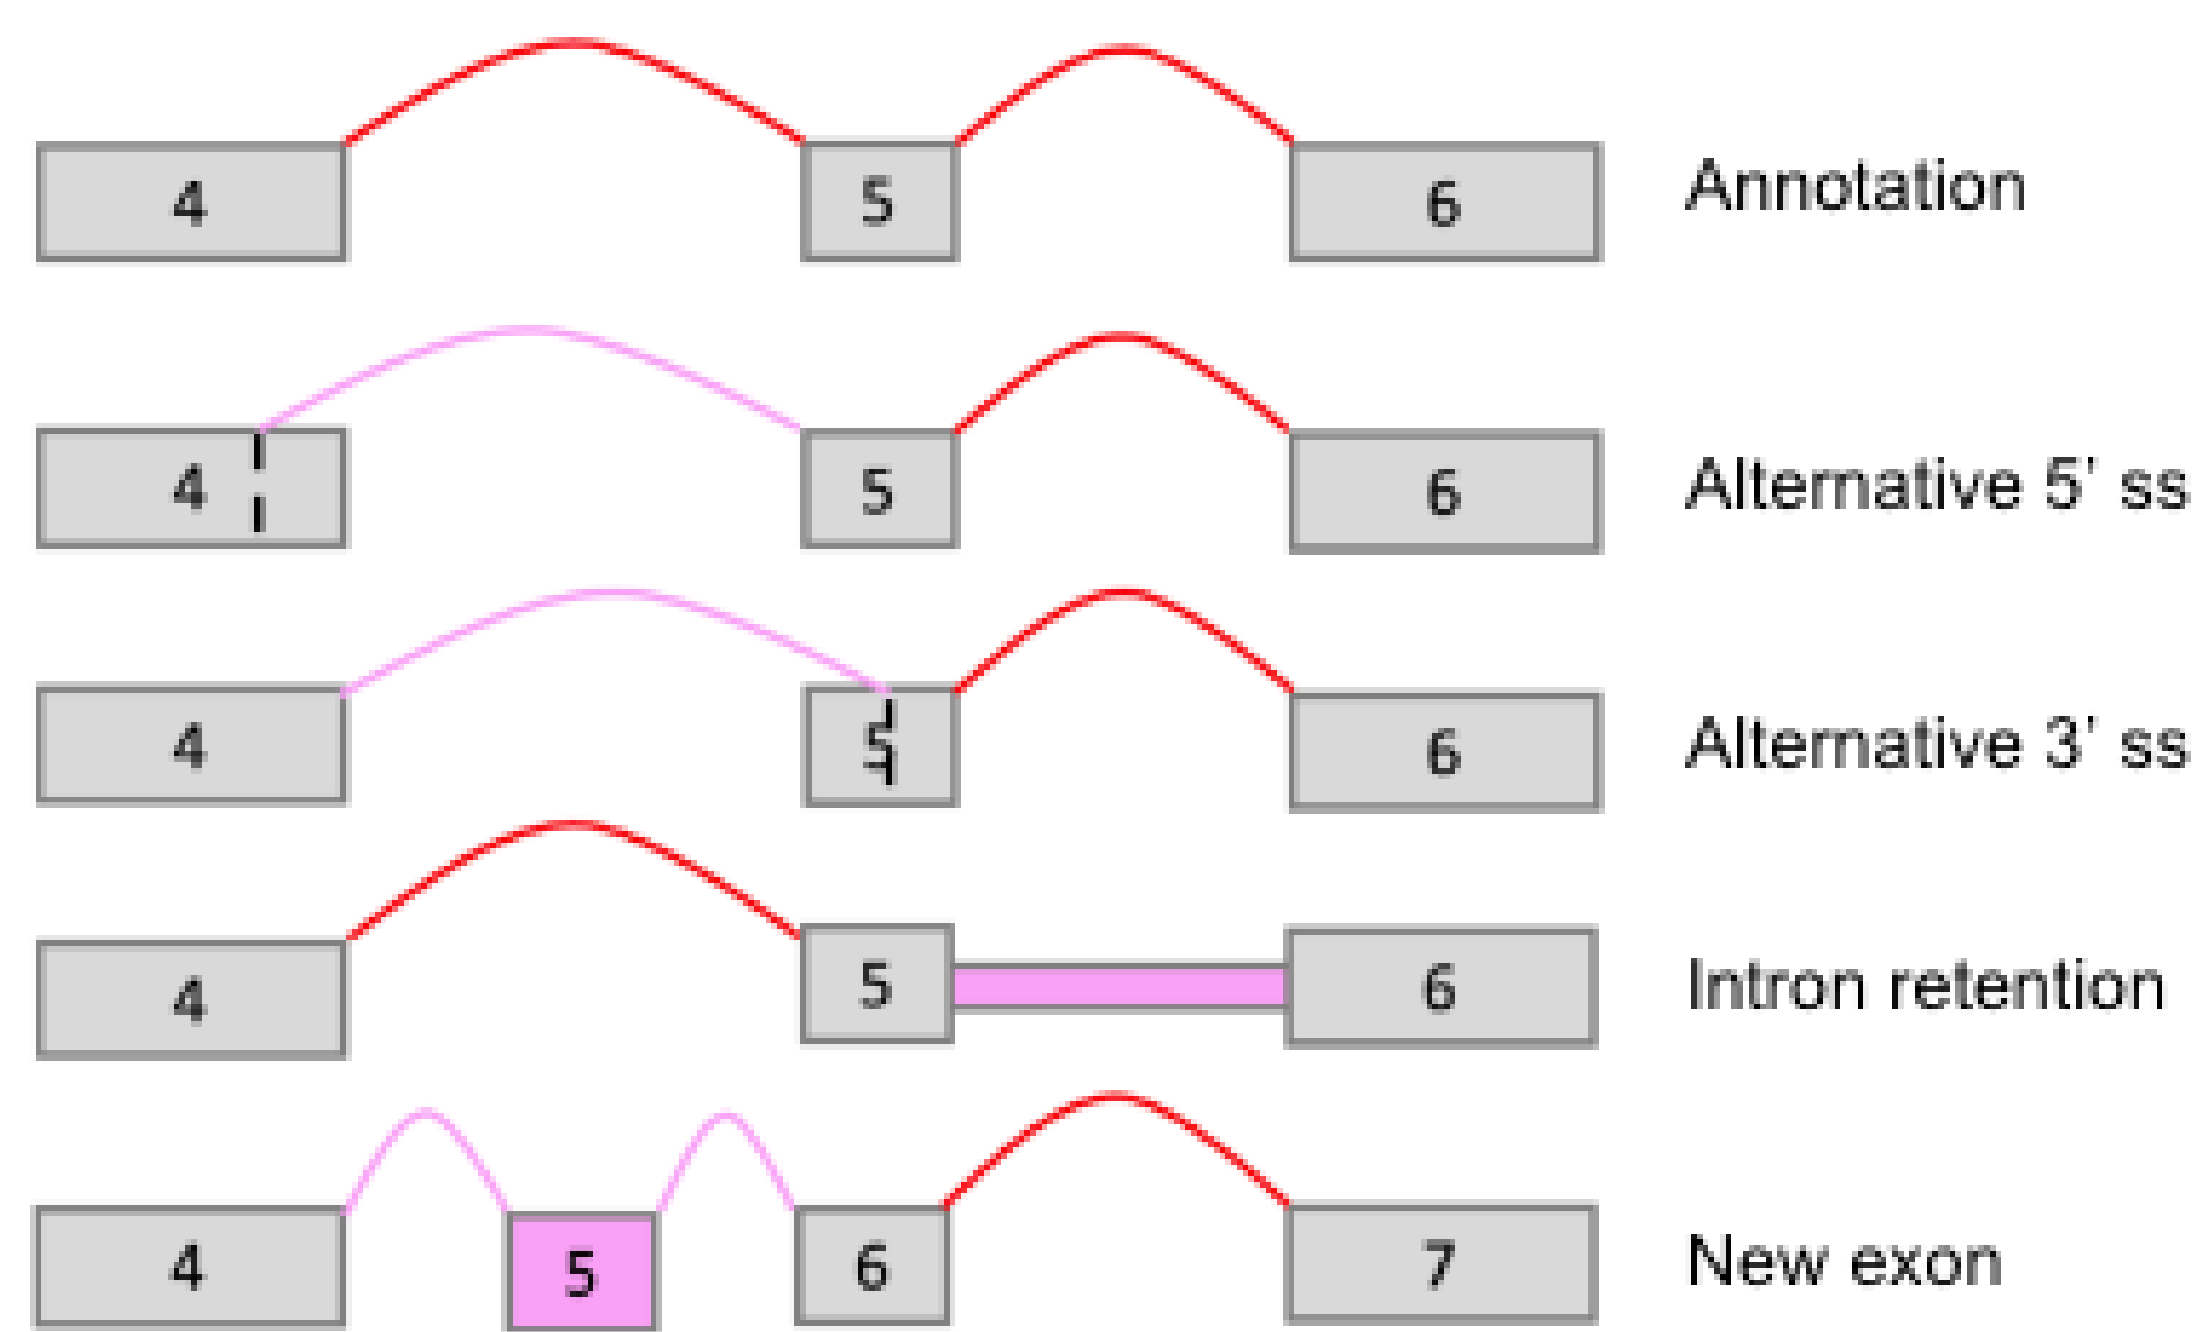

B

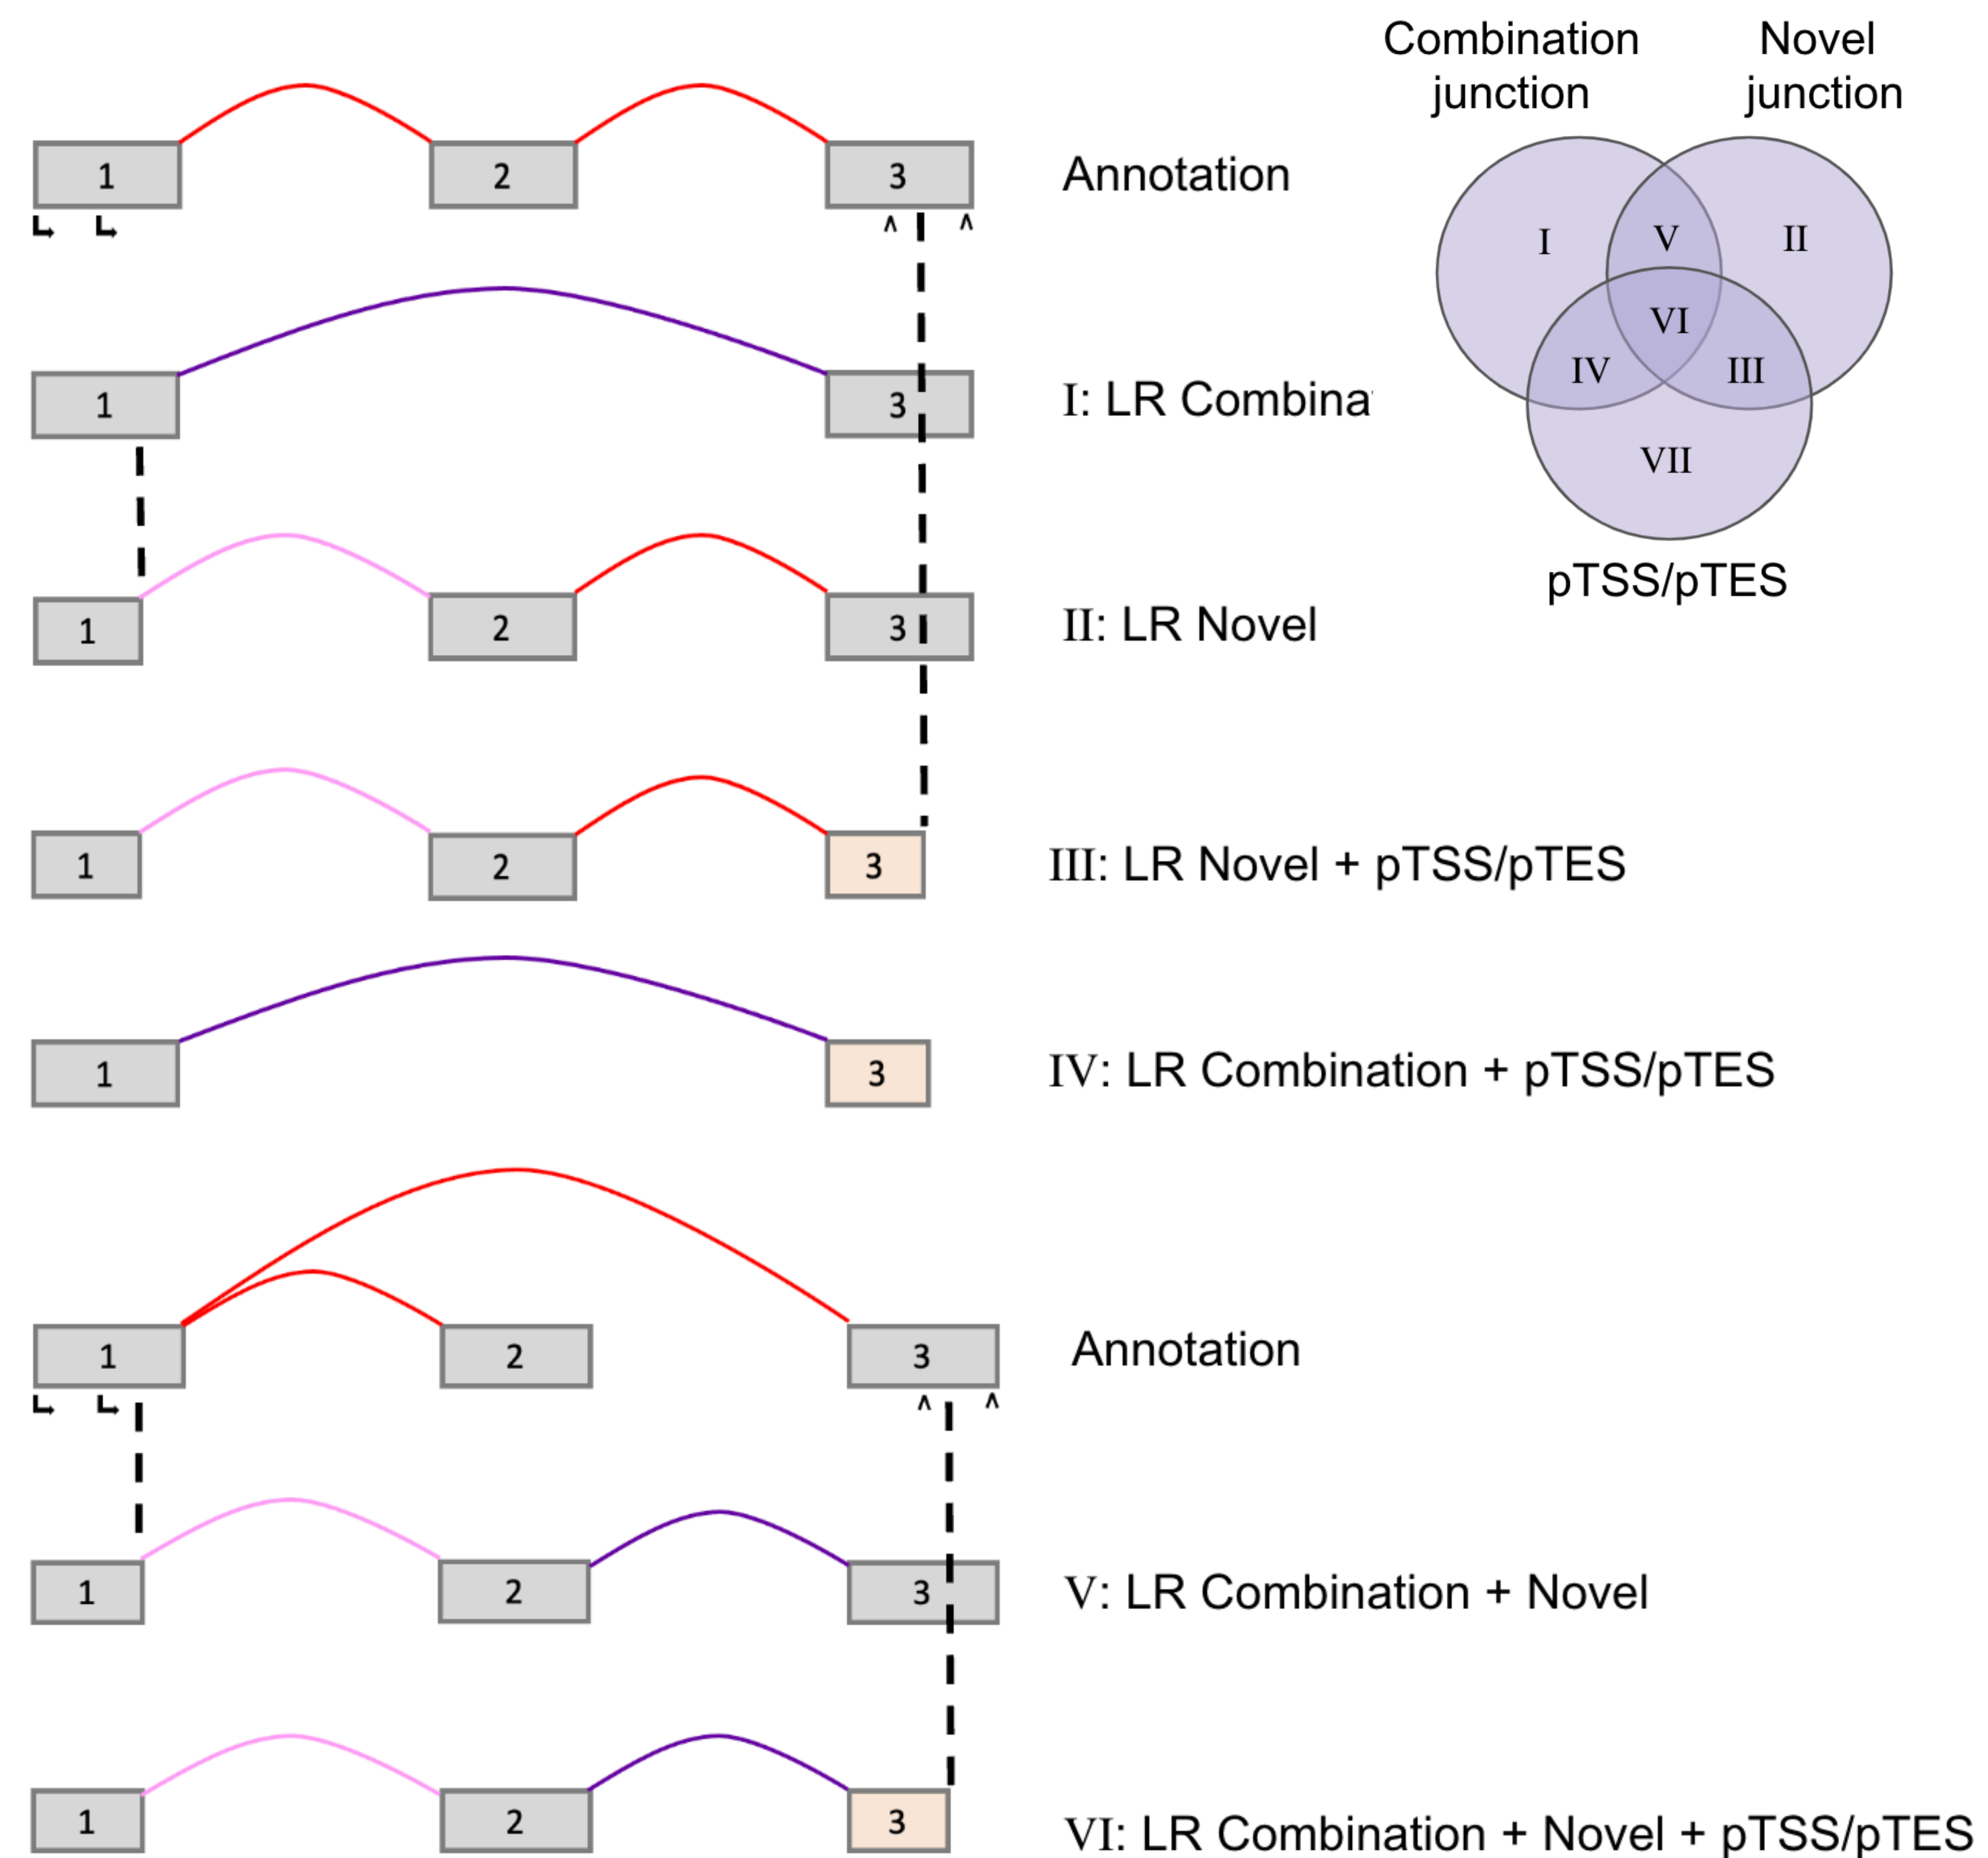

E

IsoQuant PacBio novel splice site

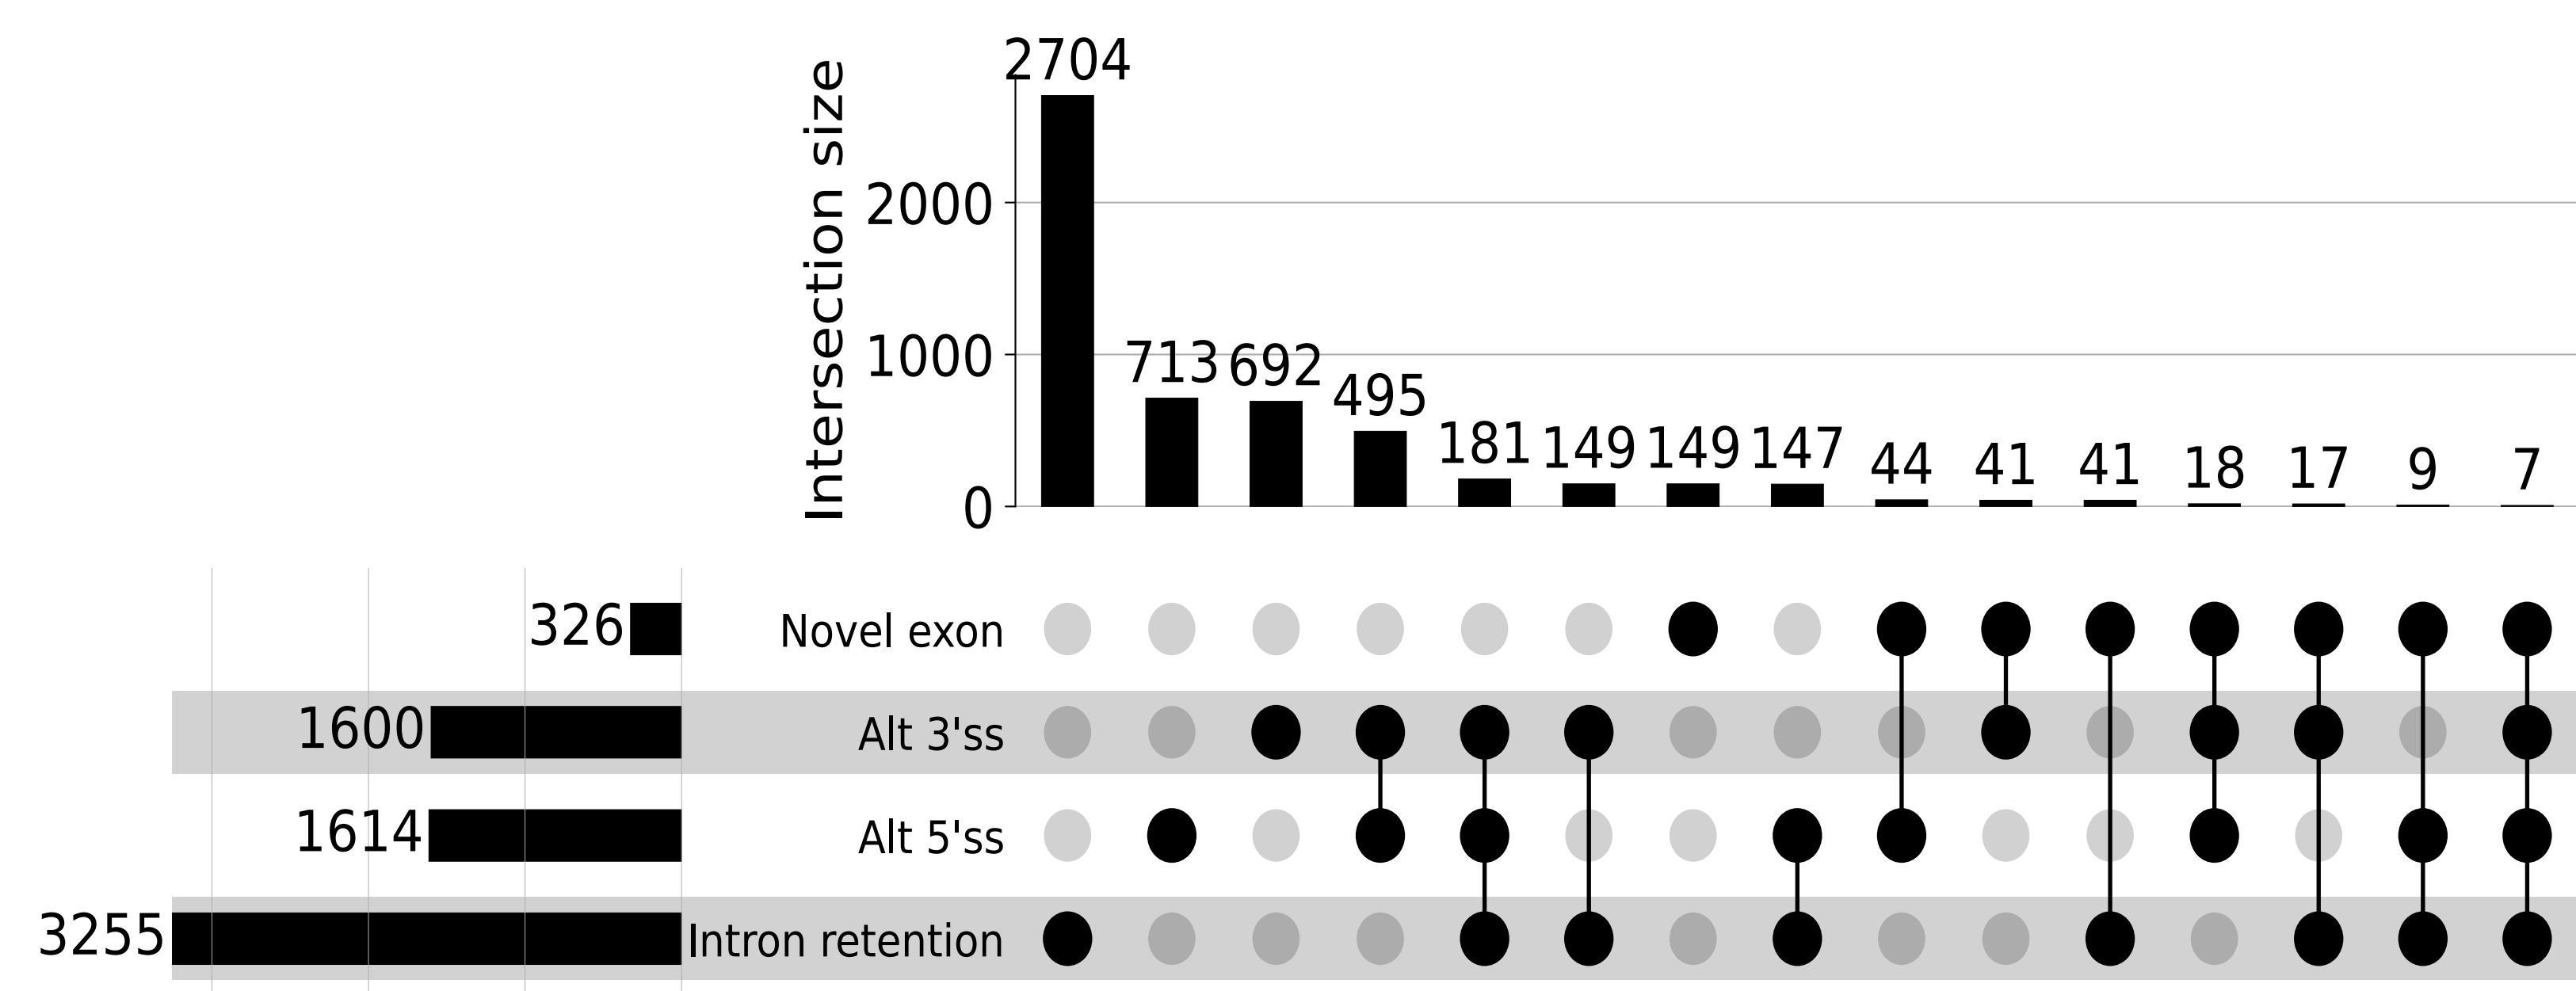

C

IsoQuant PacBio de novo junction

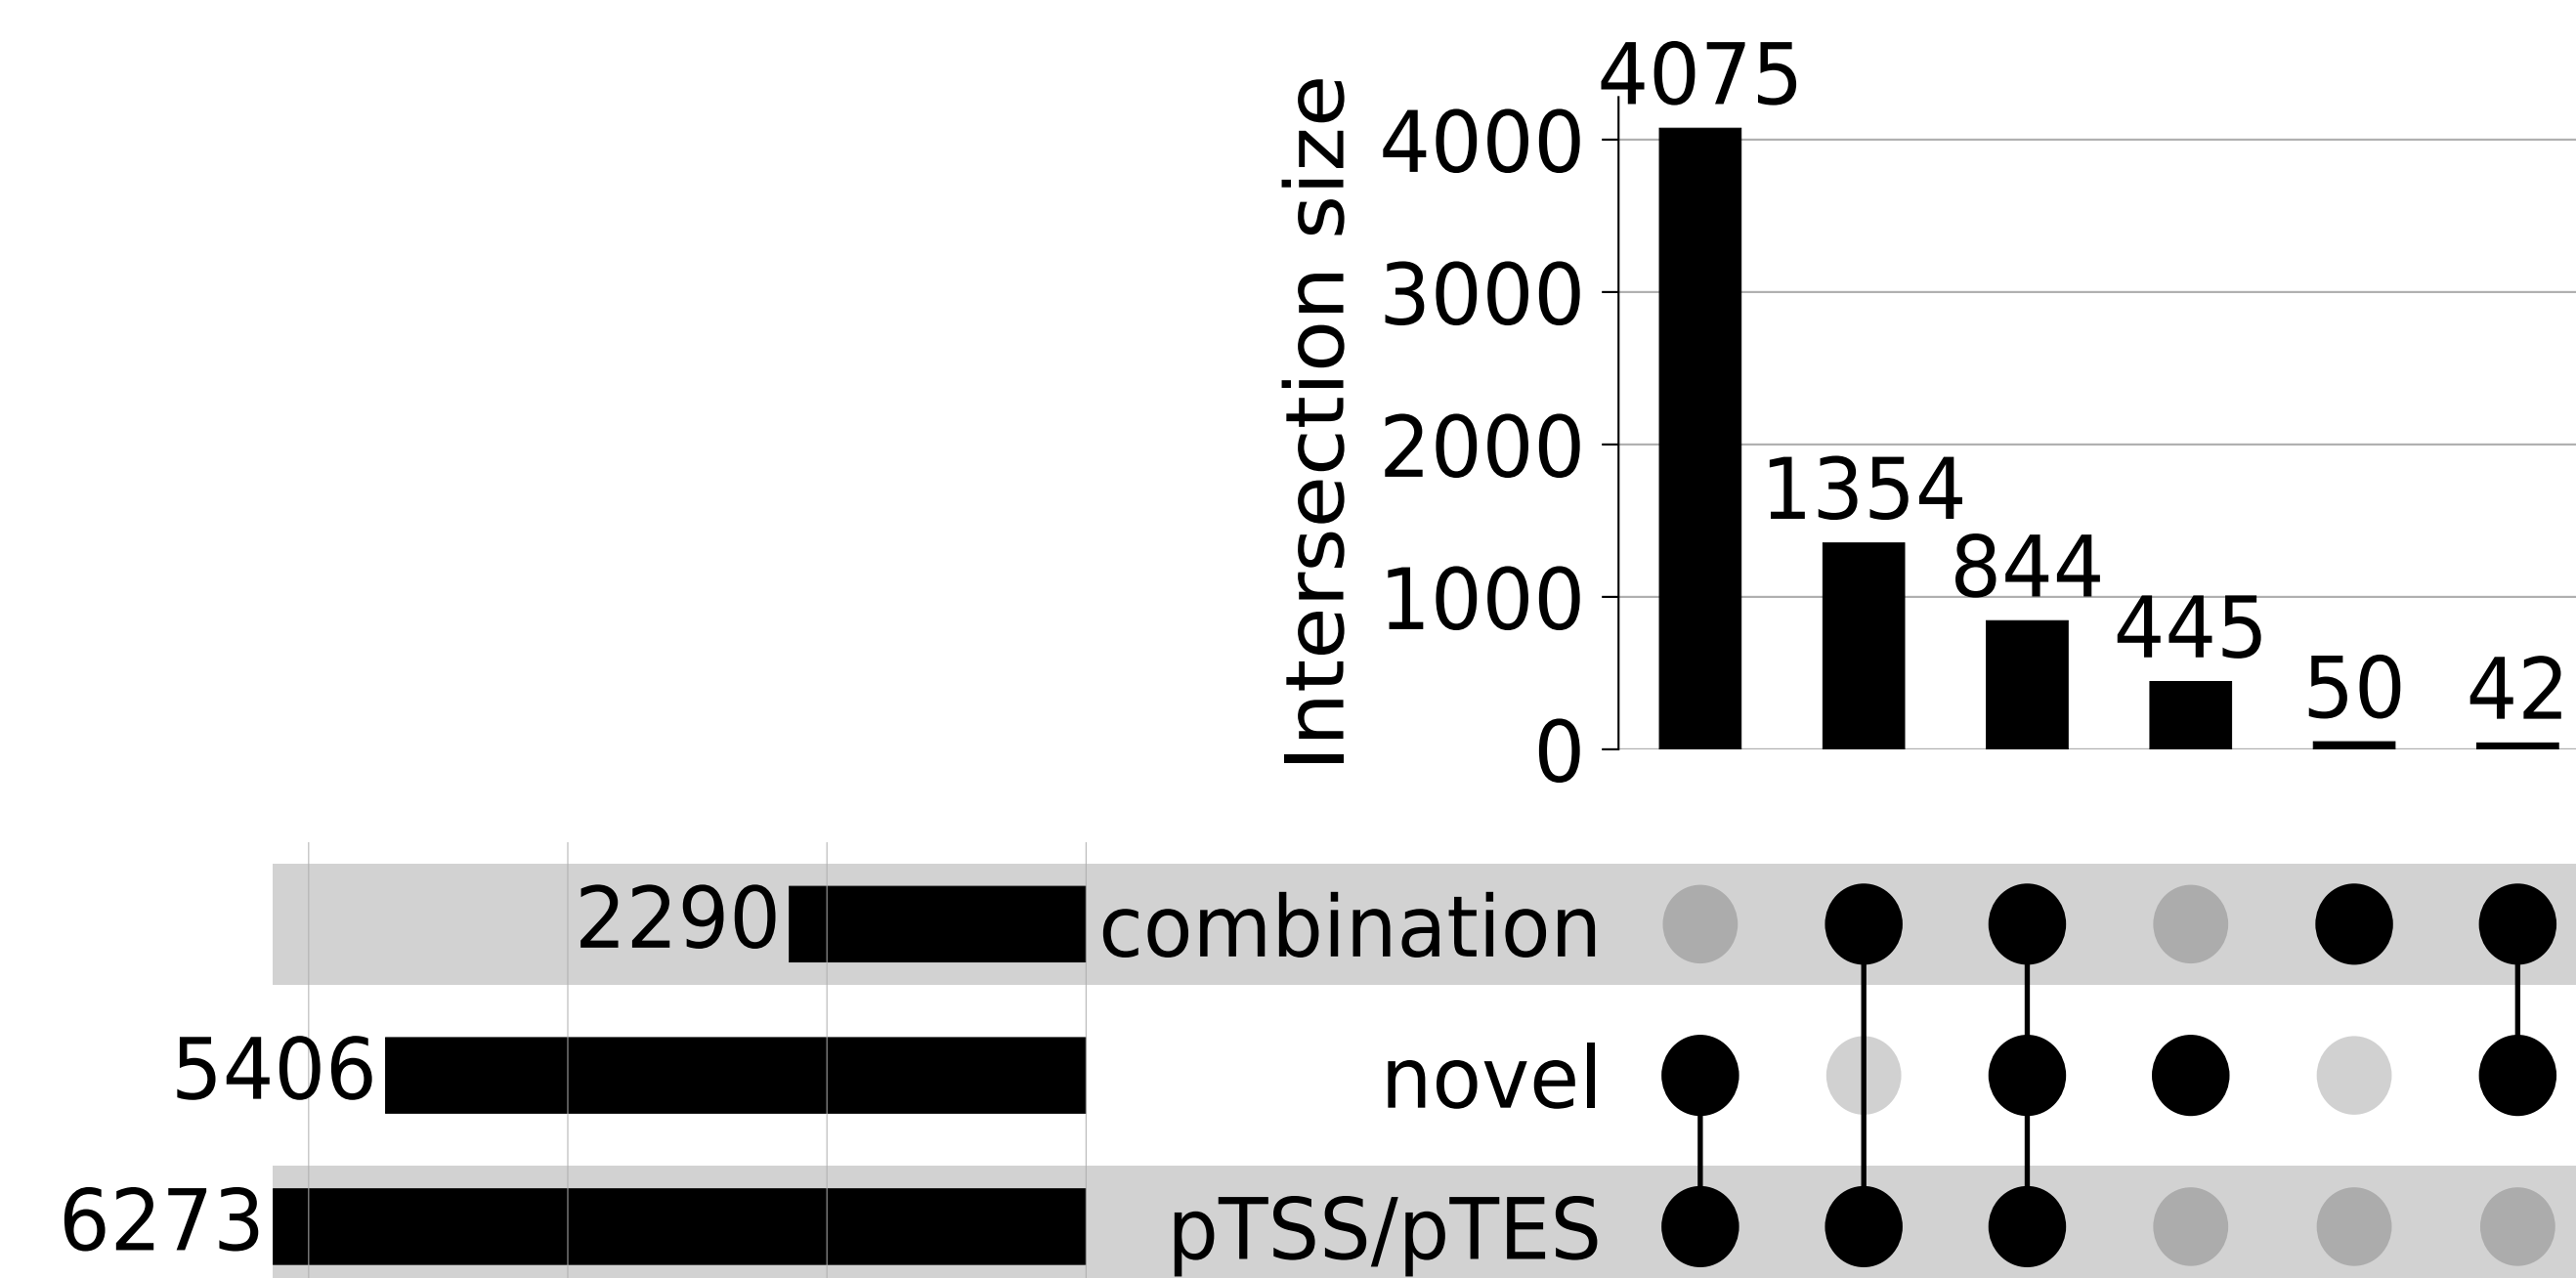

IsoQuant ONT de novo junction

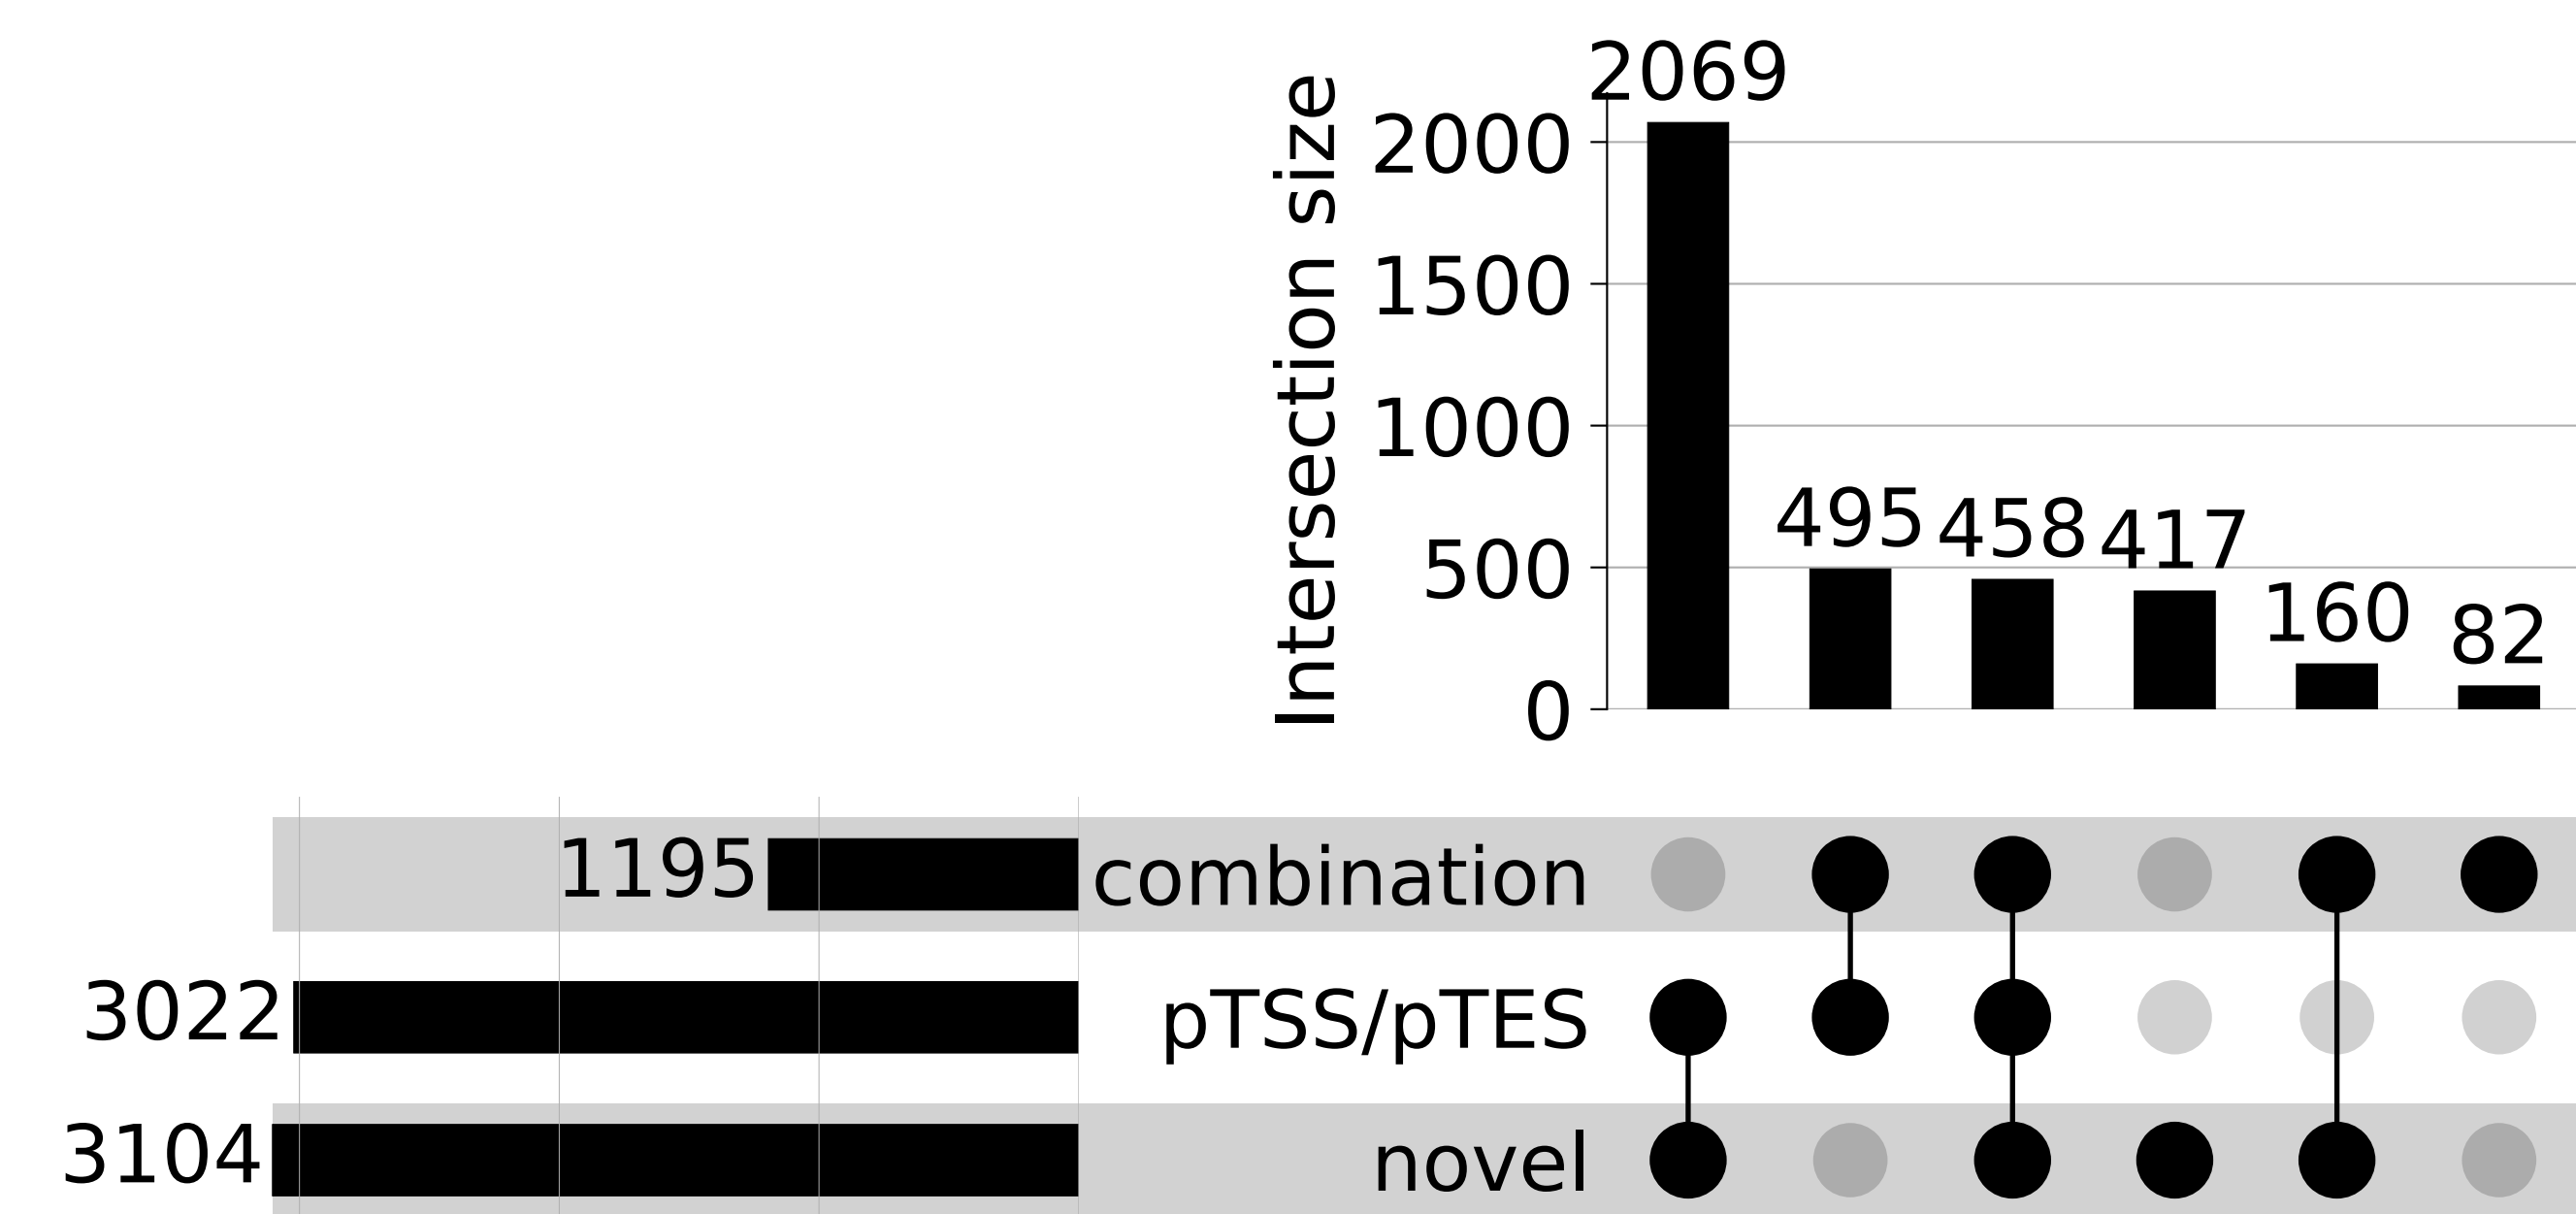

IsoQuant ONT novel splice site

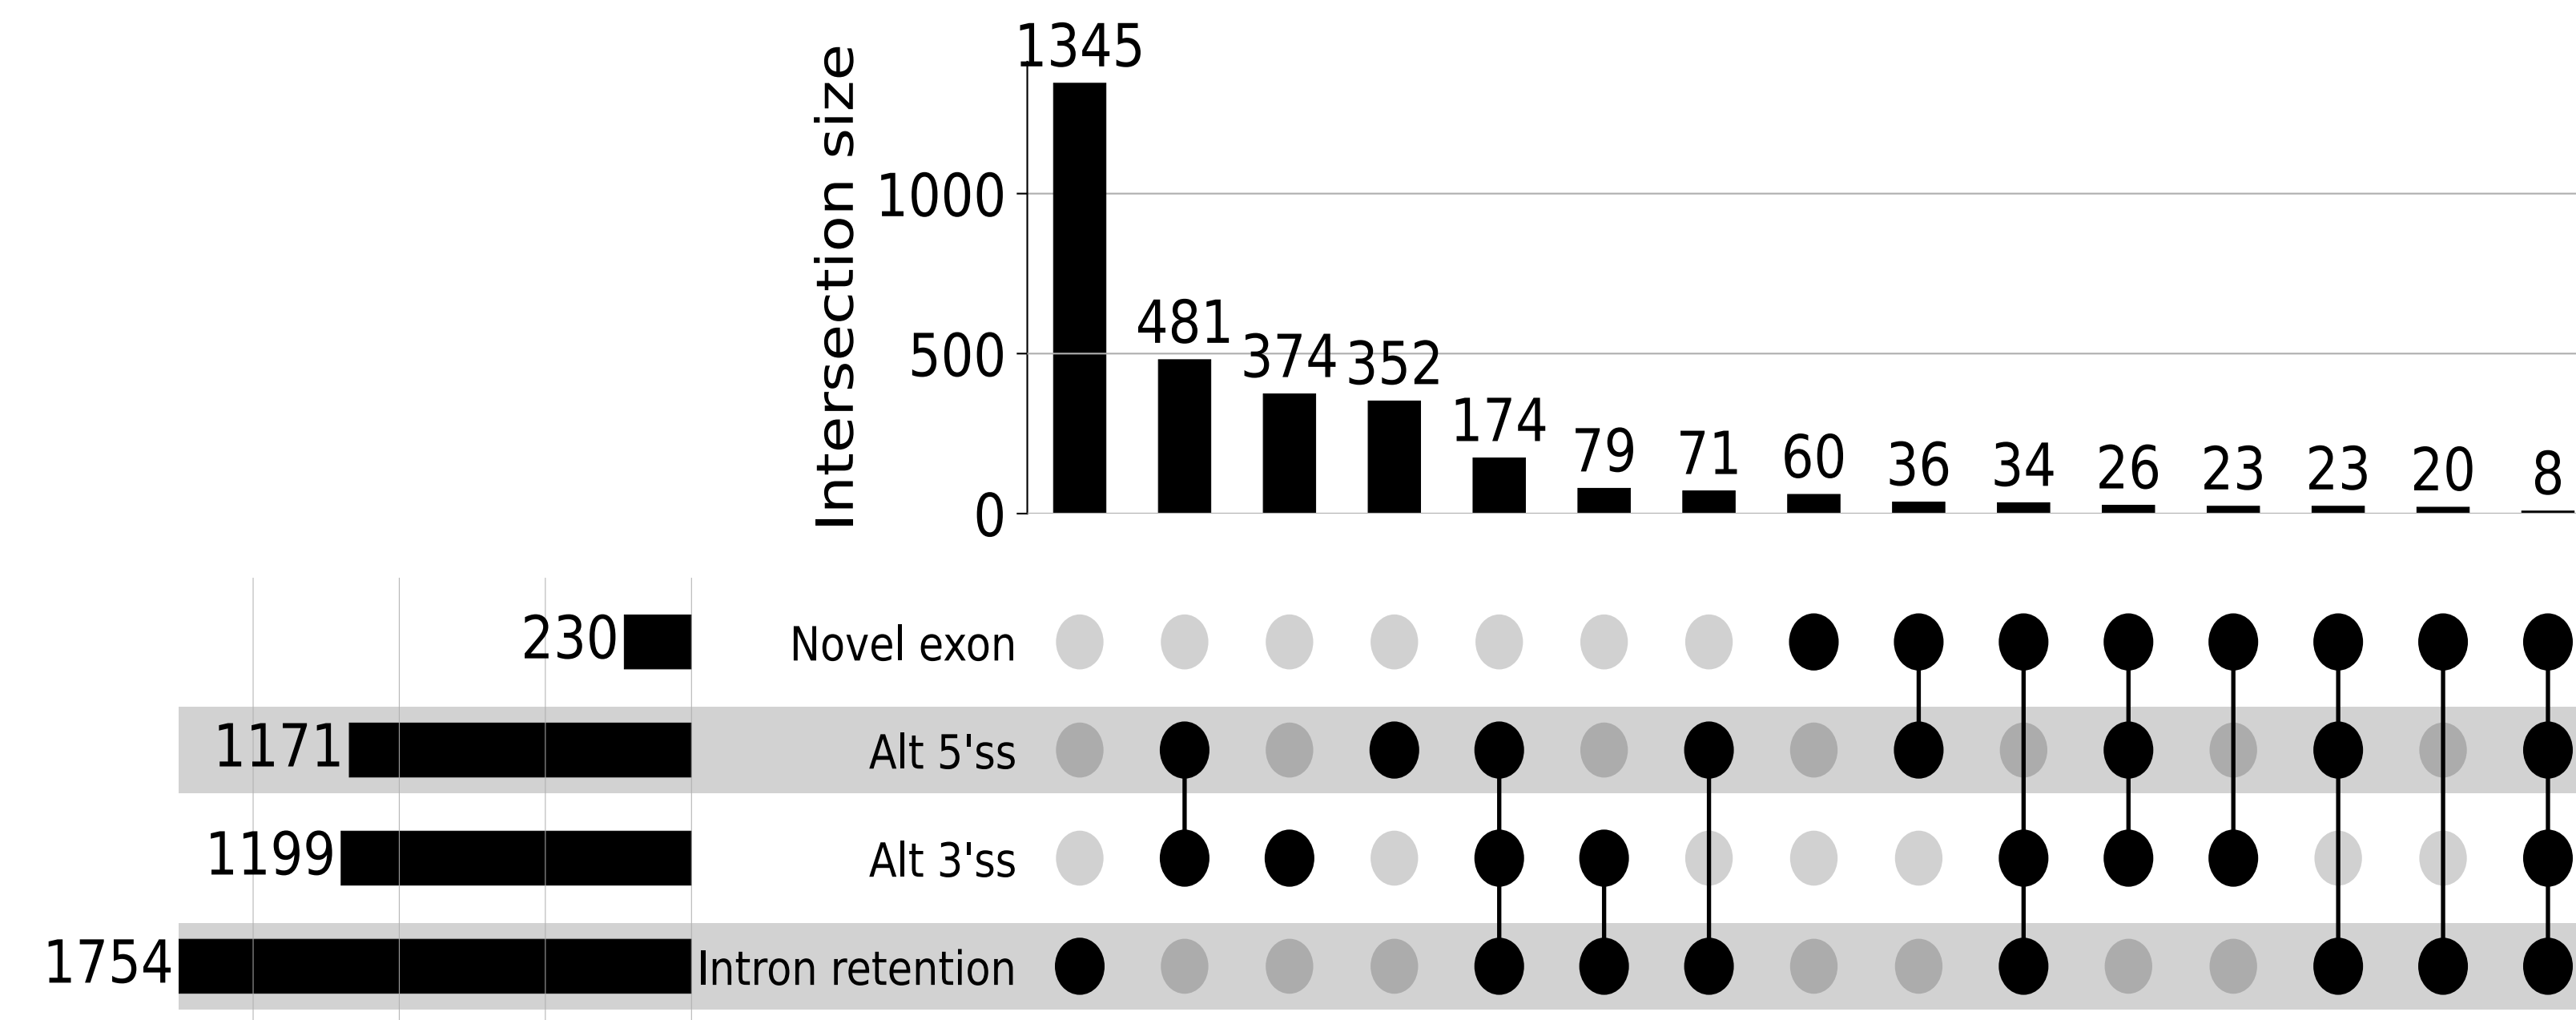

Supplement: Supplemental_code.zip [file Fig_3.pdf › Supplemental_code/figures/Fig_3/Fig_3.pdf]
