# Supplementary material for: Contrasting and combining transcriptome complexity captured by short and long RNA sequencing reads
Source: HighWire-hosted journal article supplement (doi:10.1101/gr.278659.123), 2024-09-25

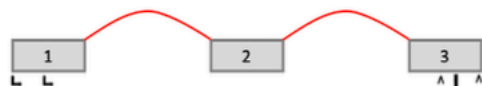

Annotation

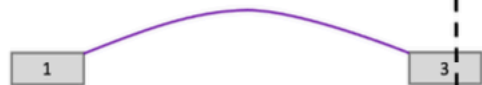

I: LR Combina

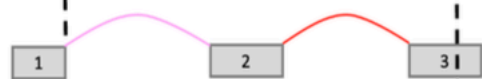

II: LR Novel

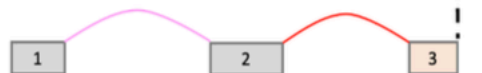

III: LR Novel + pTSS/pTES

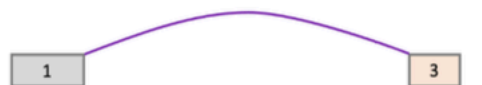

IV: LR Combination + pTSS/pTES

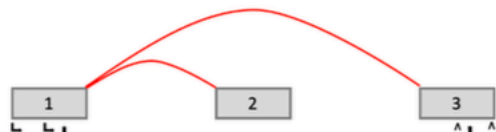

Annotation

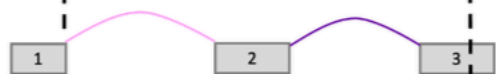

V: LR Combination + Novel

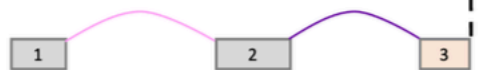

VI: LR Combination + Novel + pTSS/pTES

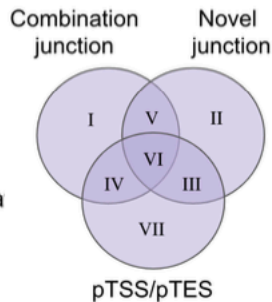

Supplement: Supplemental_code.zip [file Fig_3B_lr_denovo.pdf › Supplemental_code/figures/Fig_3/Fig_3B_lr_denovo.pdf]
