# Supplementary material for: Contrasting and combining transcriptome complexity captured by short and long RNA sequencing reads
Source: HighWire-hosted journal article supplement (doi:10.1101/gr.278659.123), 2024-09-25

A

IsoQuant and MAJIQ intron retention

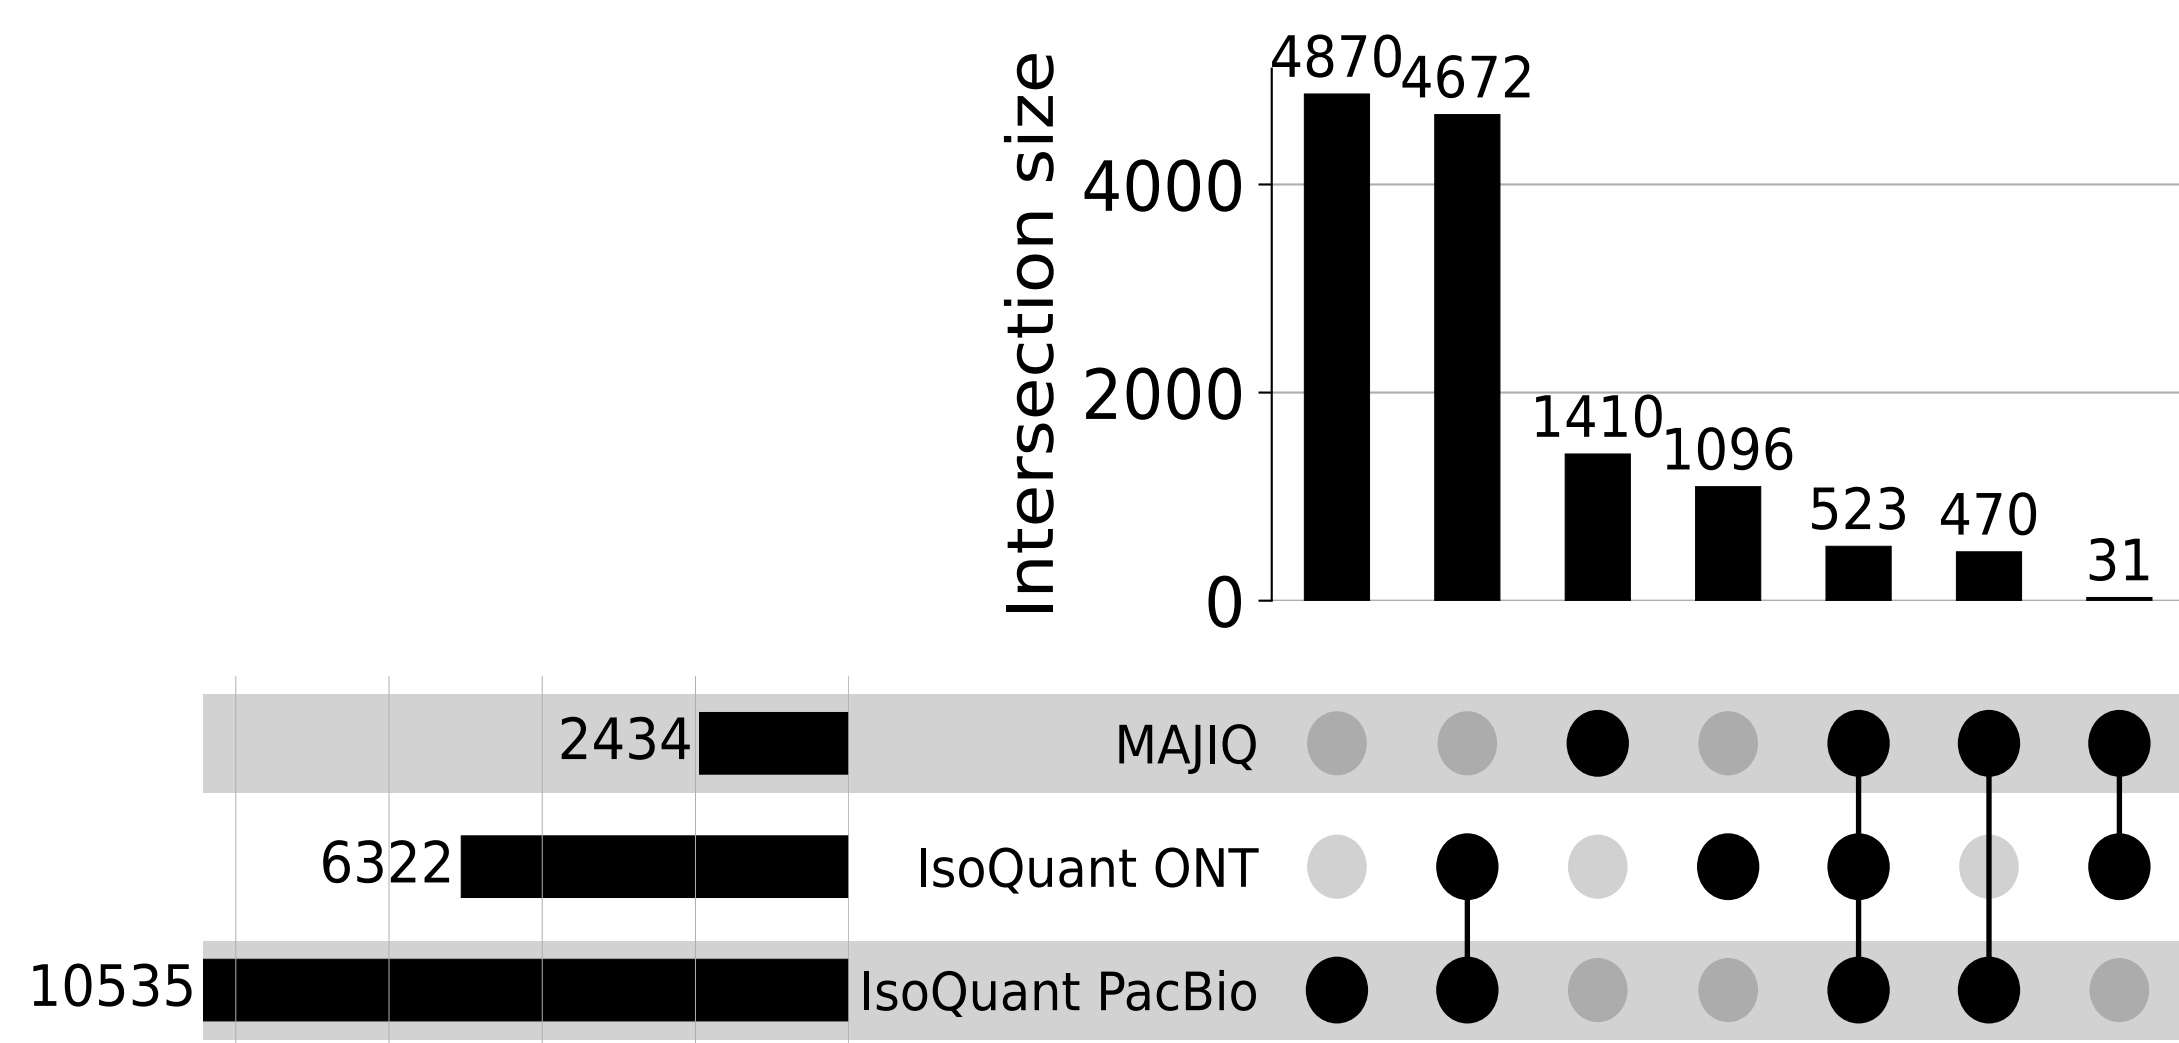

B

IsoQuant and MAJIQ intron retention length comparison

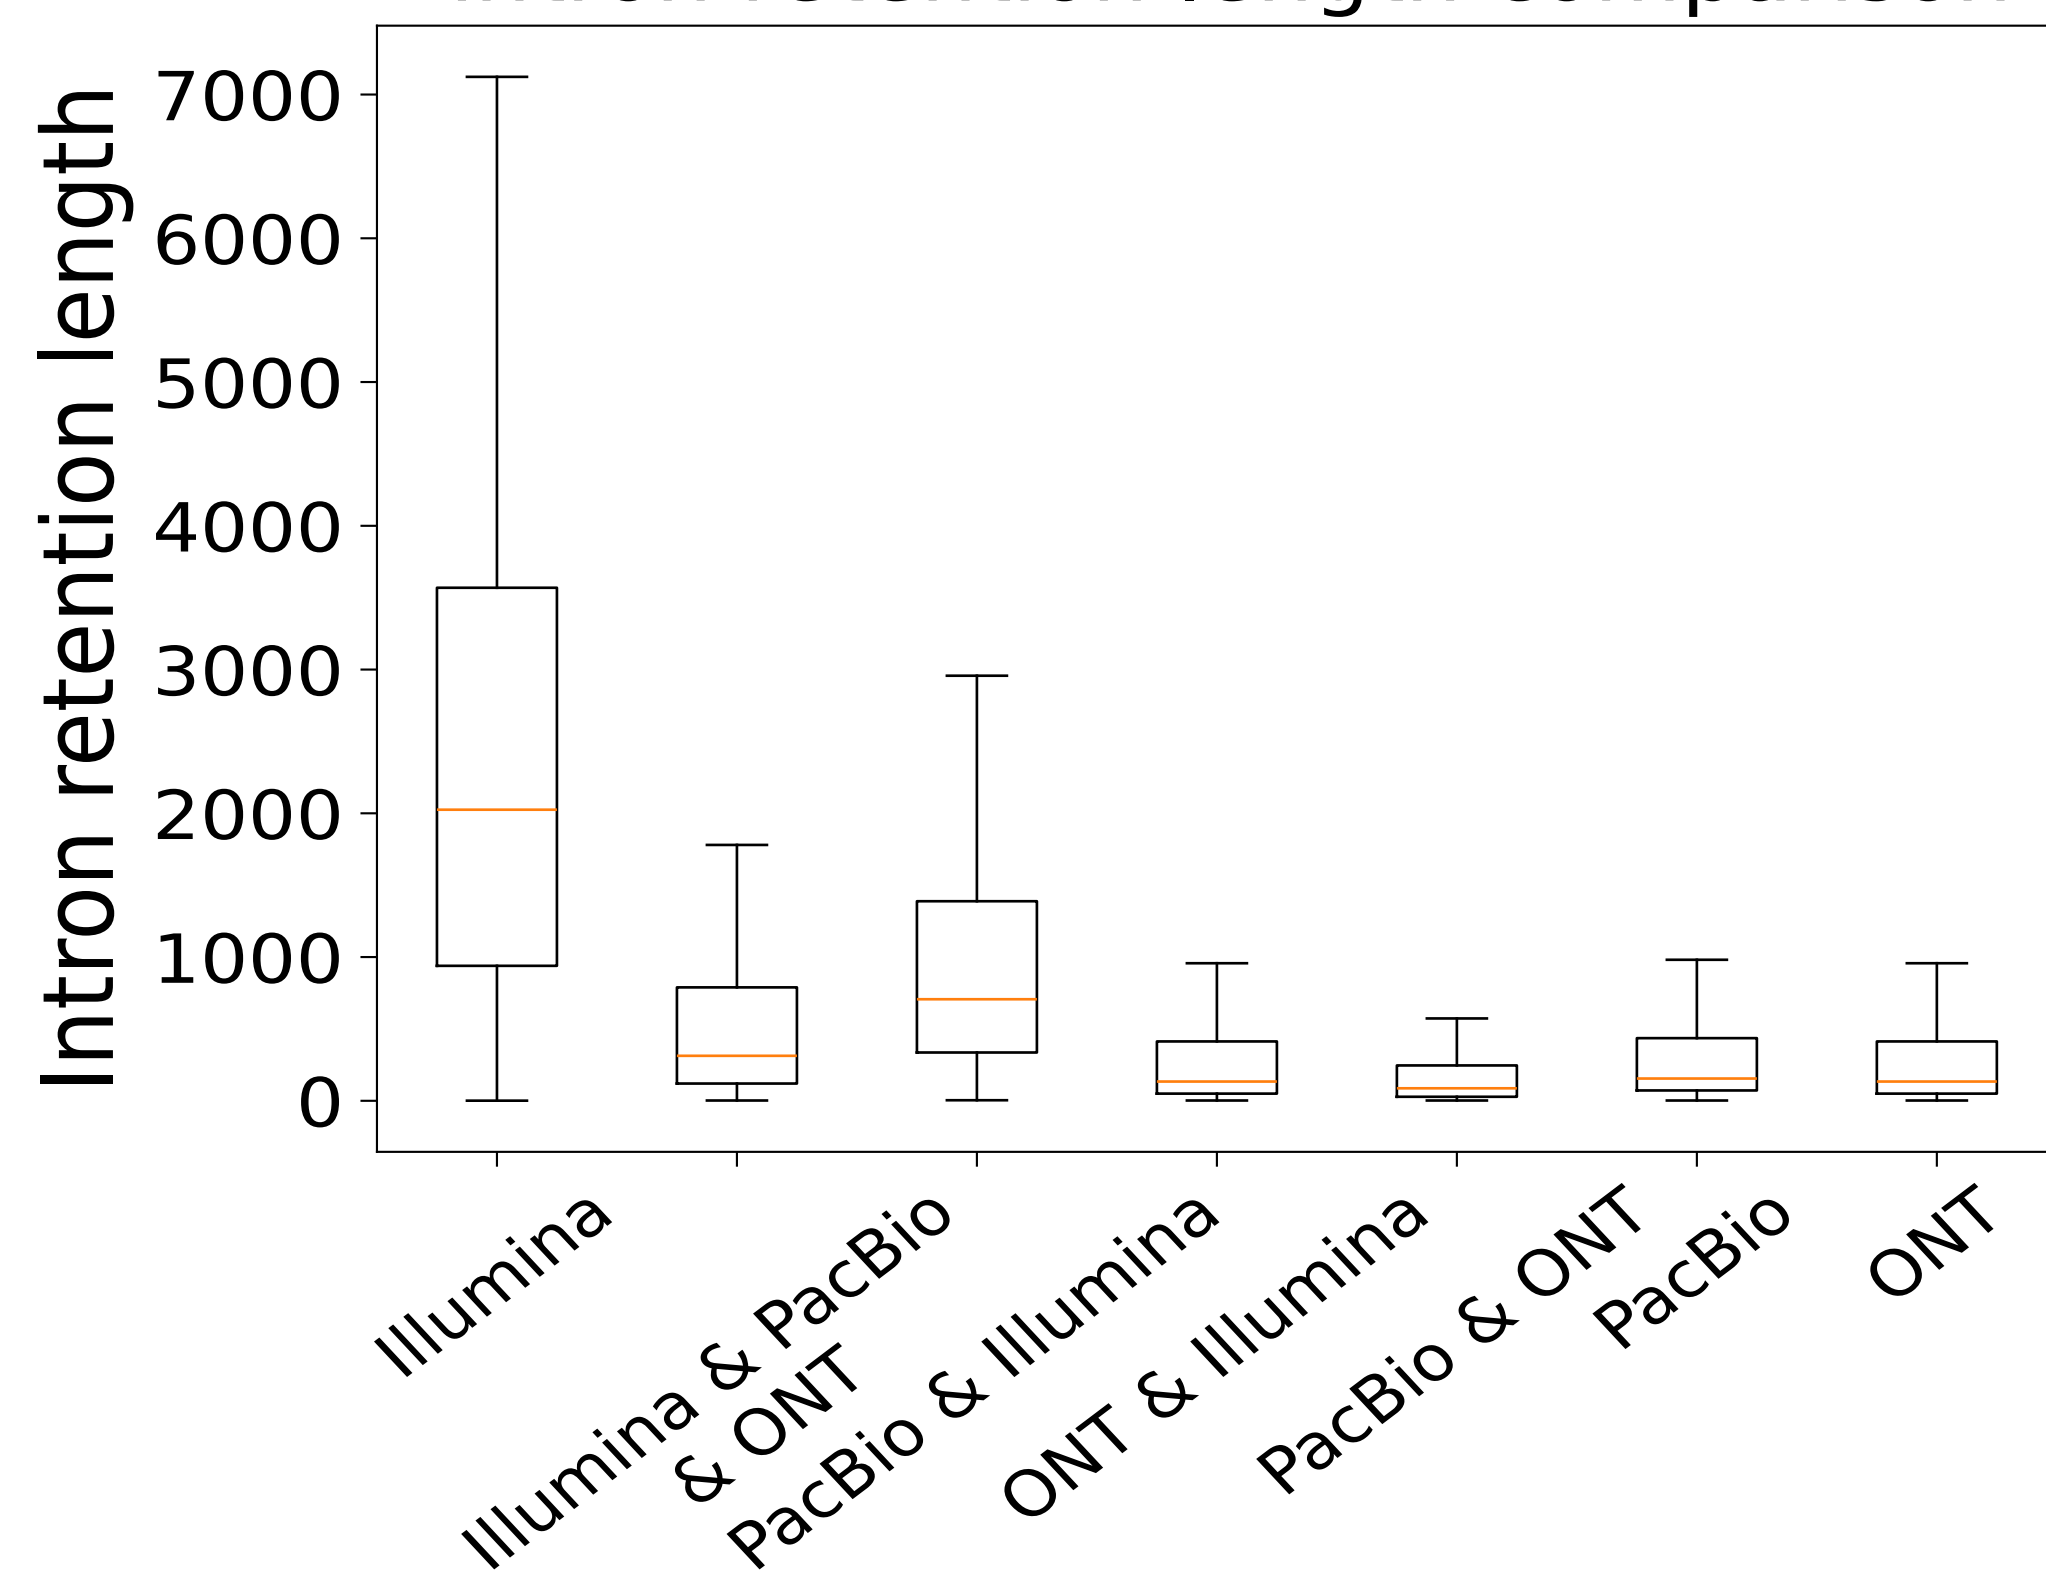

C

IR: MAJIQ and IsoQuant PSI ( $\Psi$ )

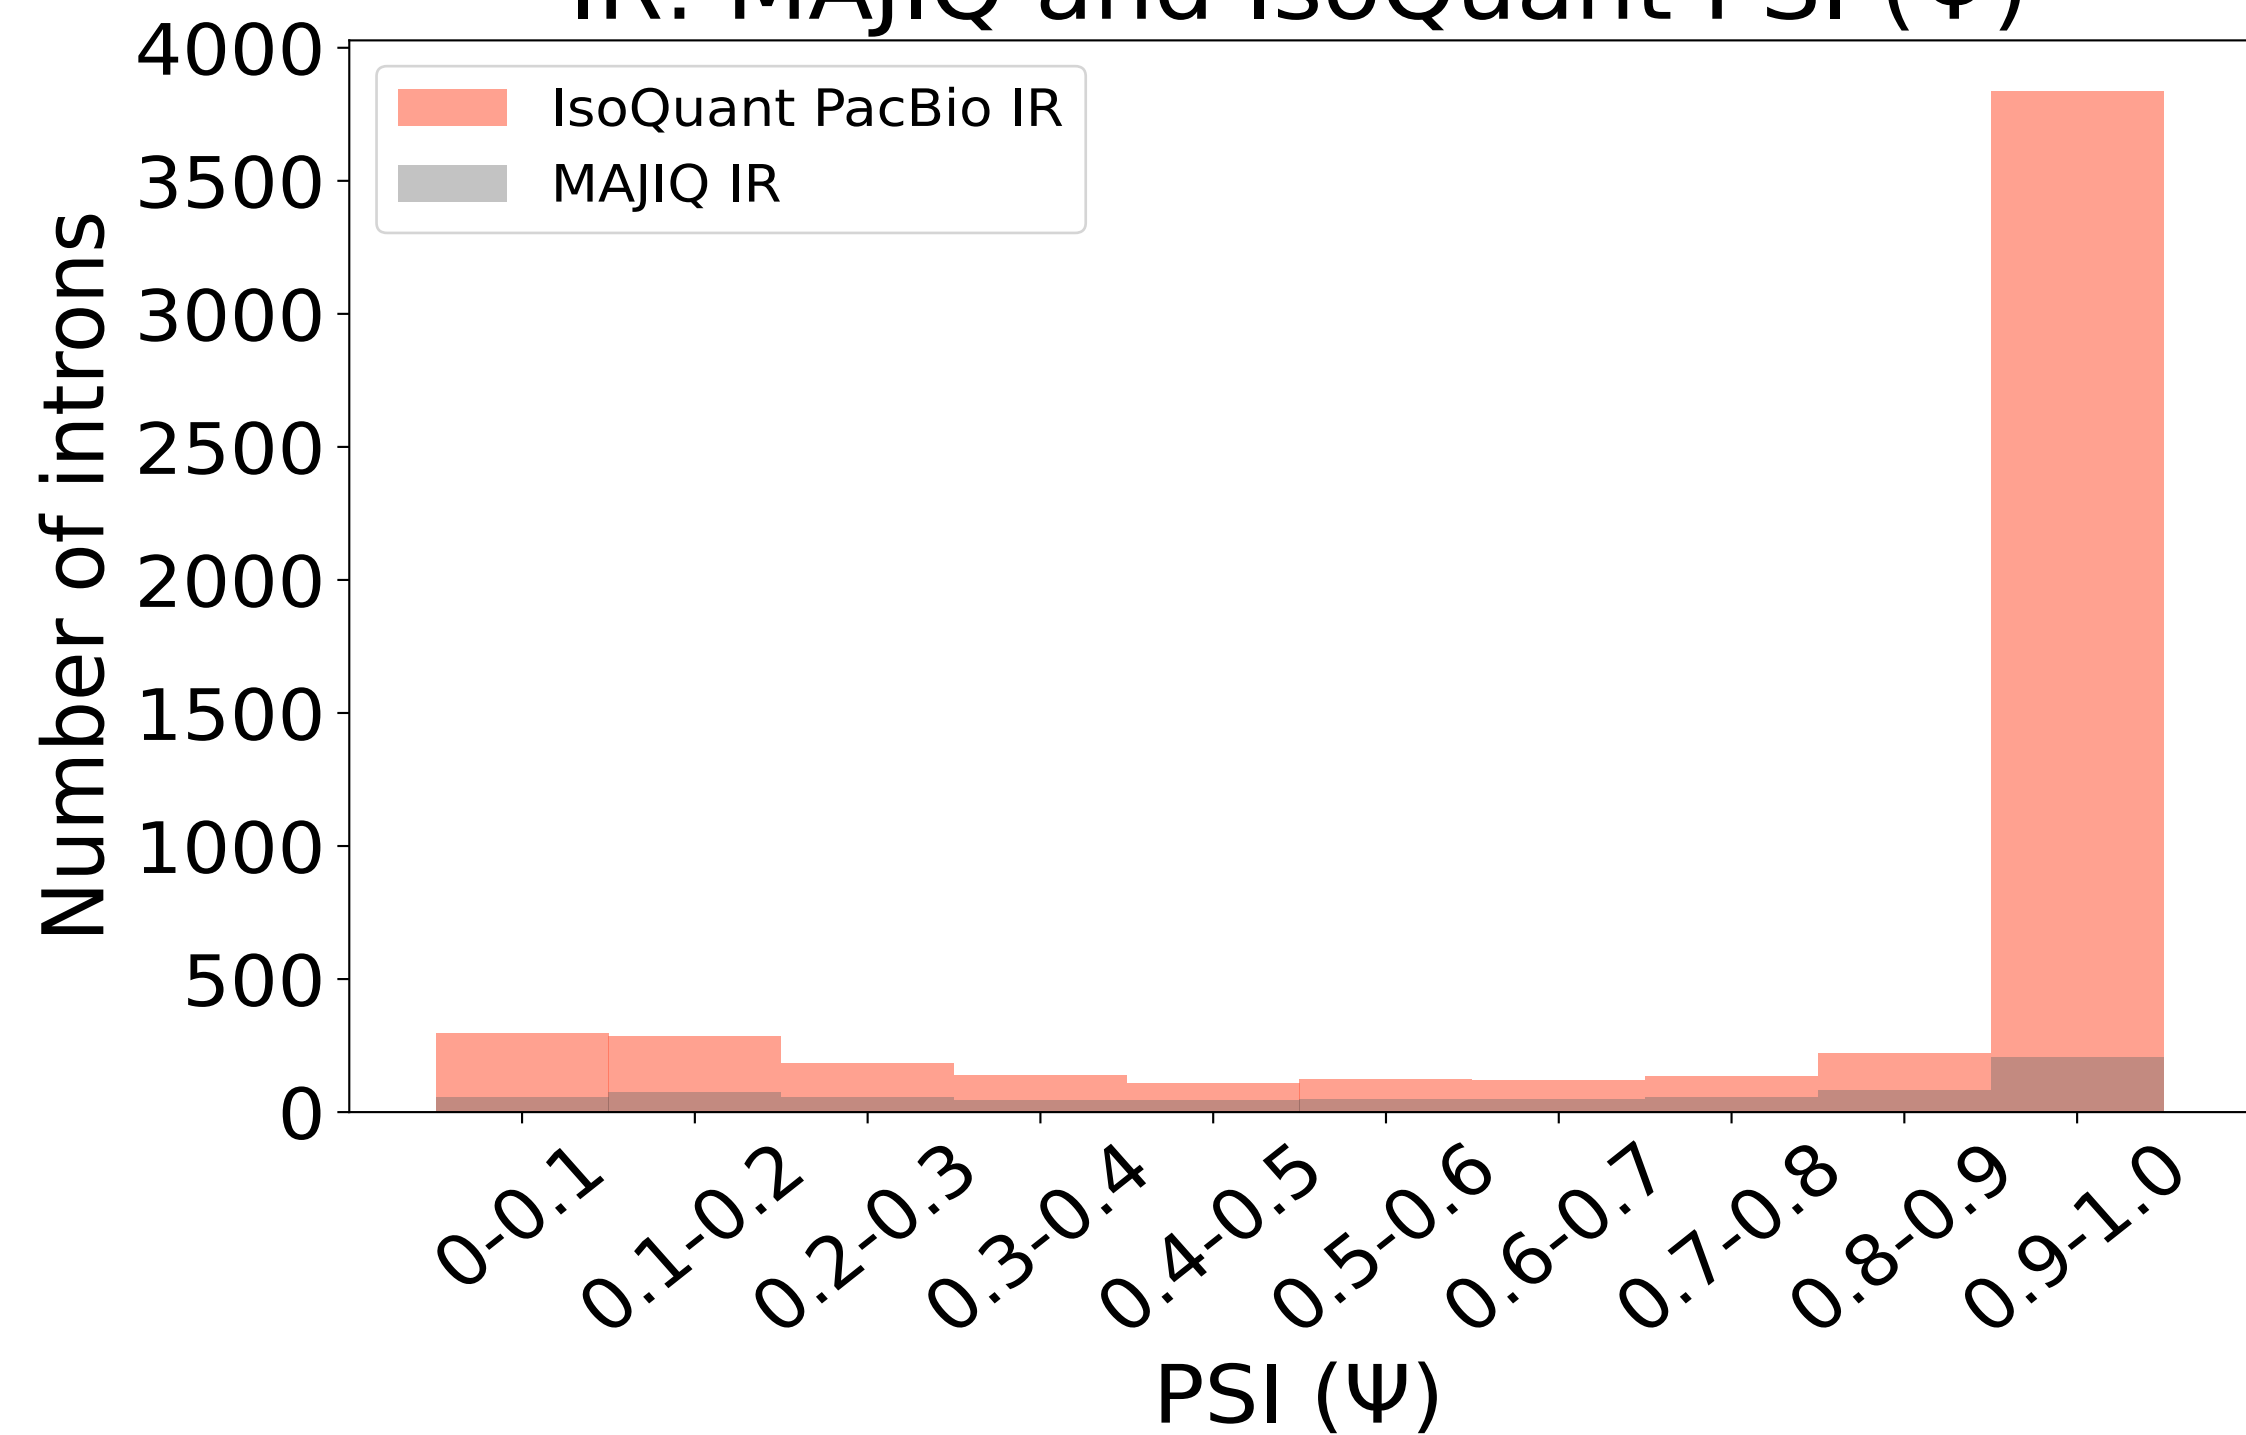

IR: MAJIQ and IsoQuant reads

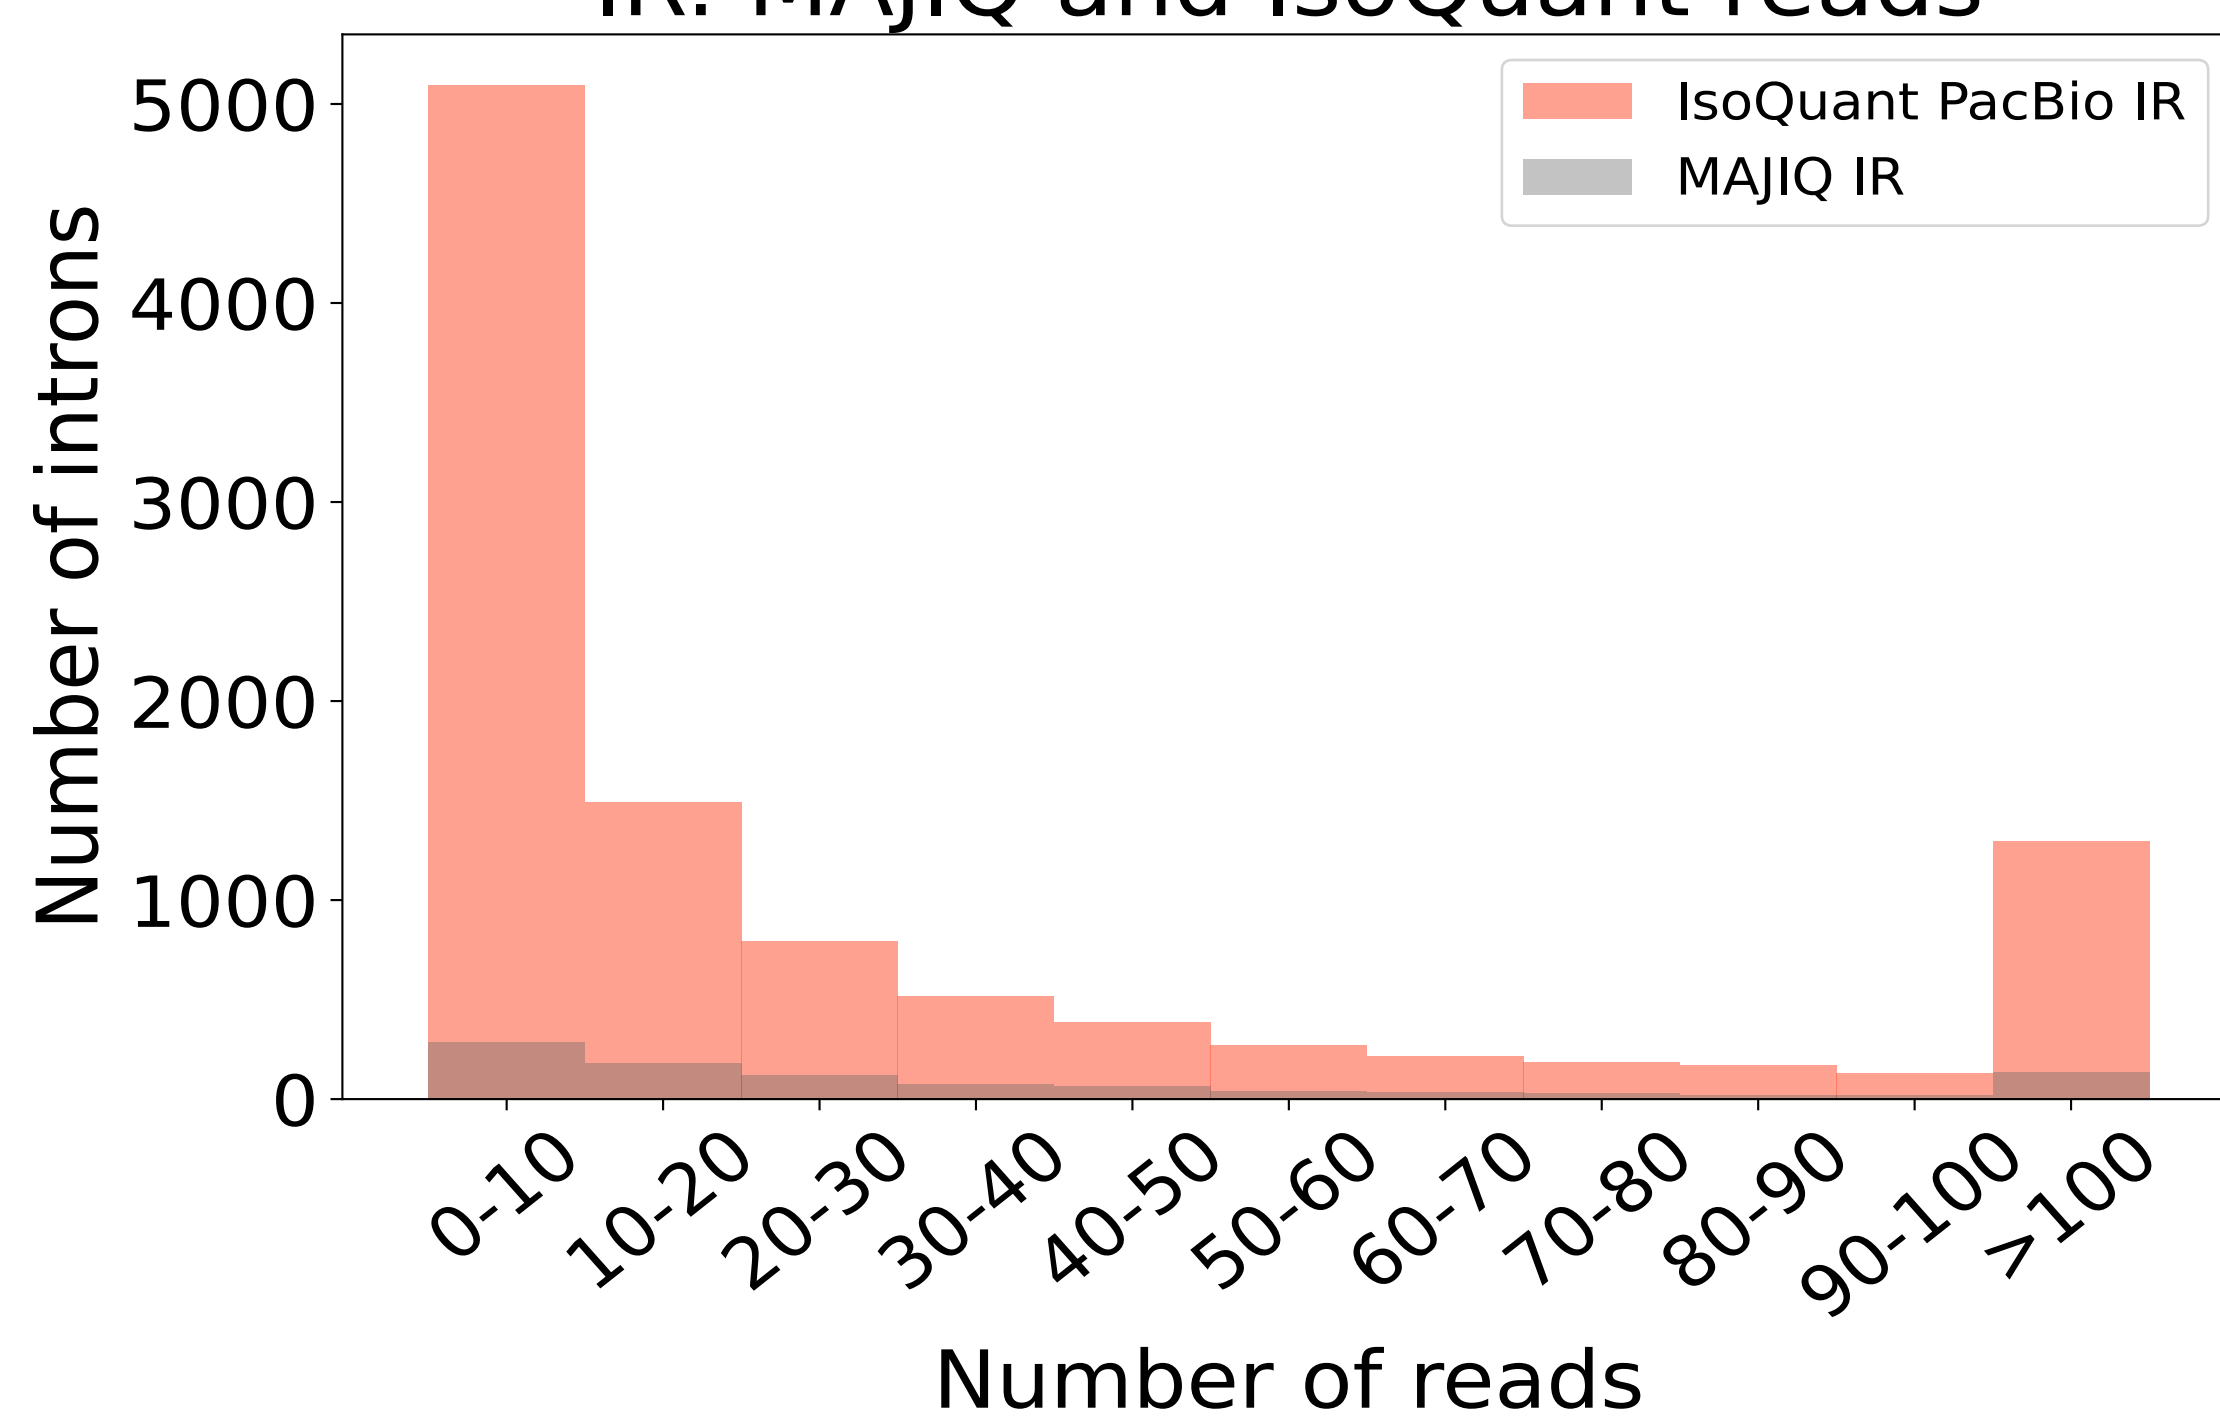

IR: MAJIQ and IsoQuant PSI ( $\Psi$ )

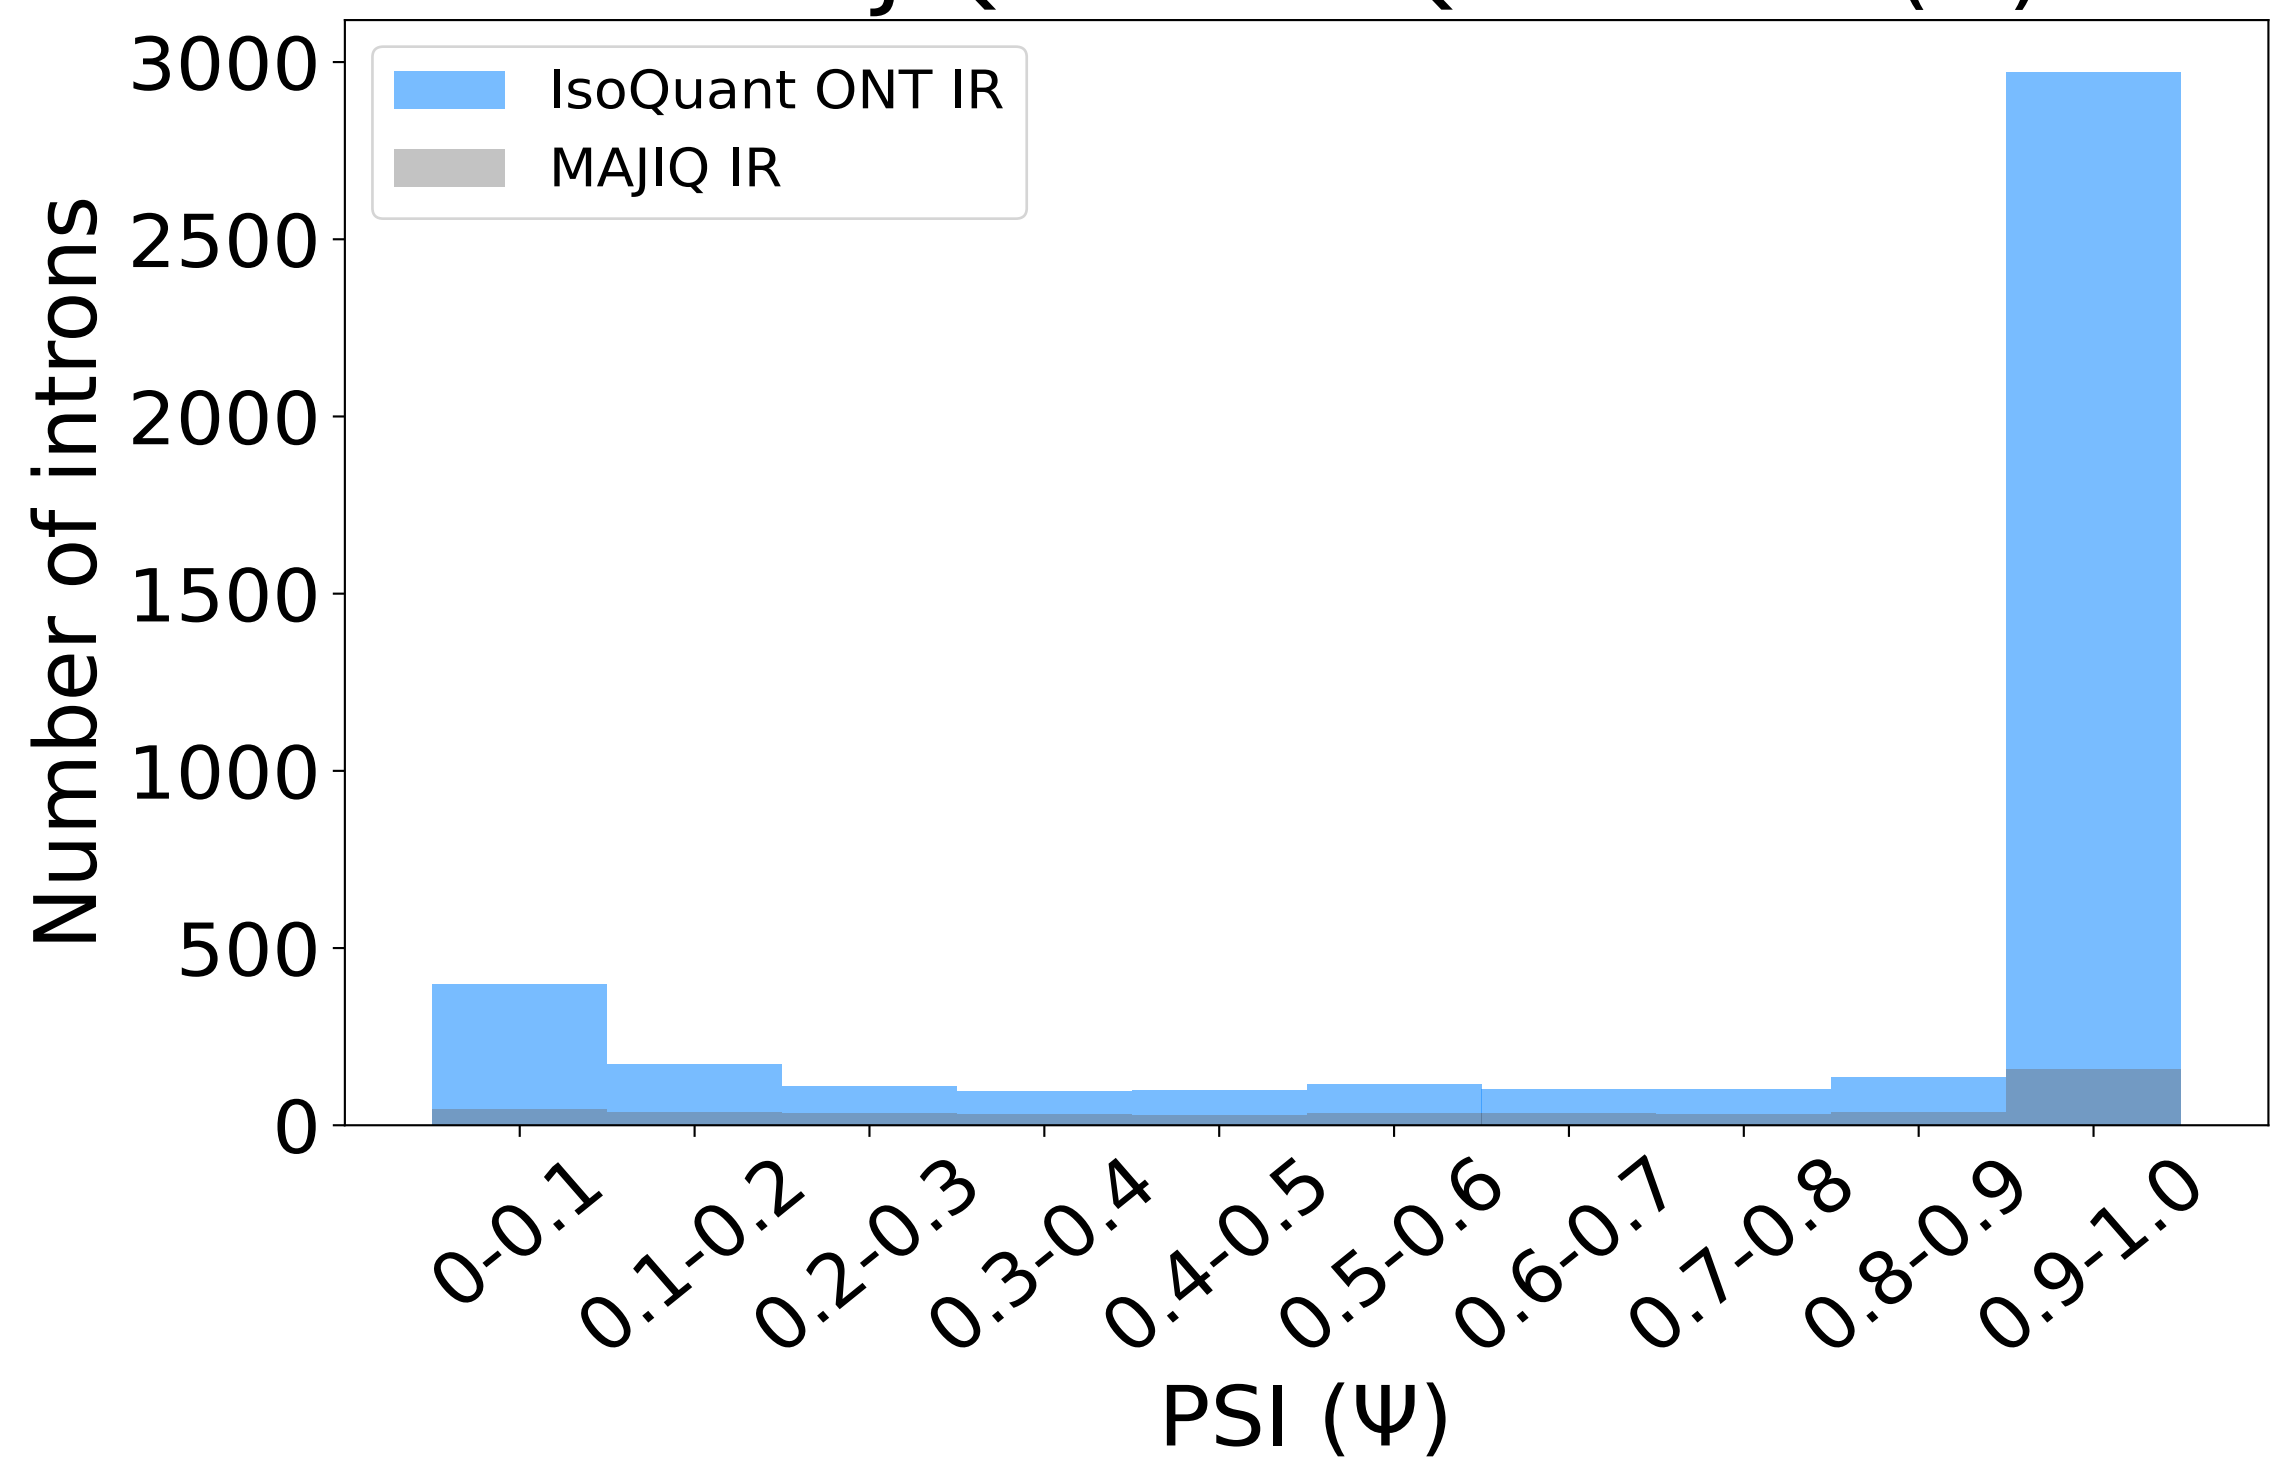

IR: MAJIQ and IsoQuant reads

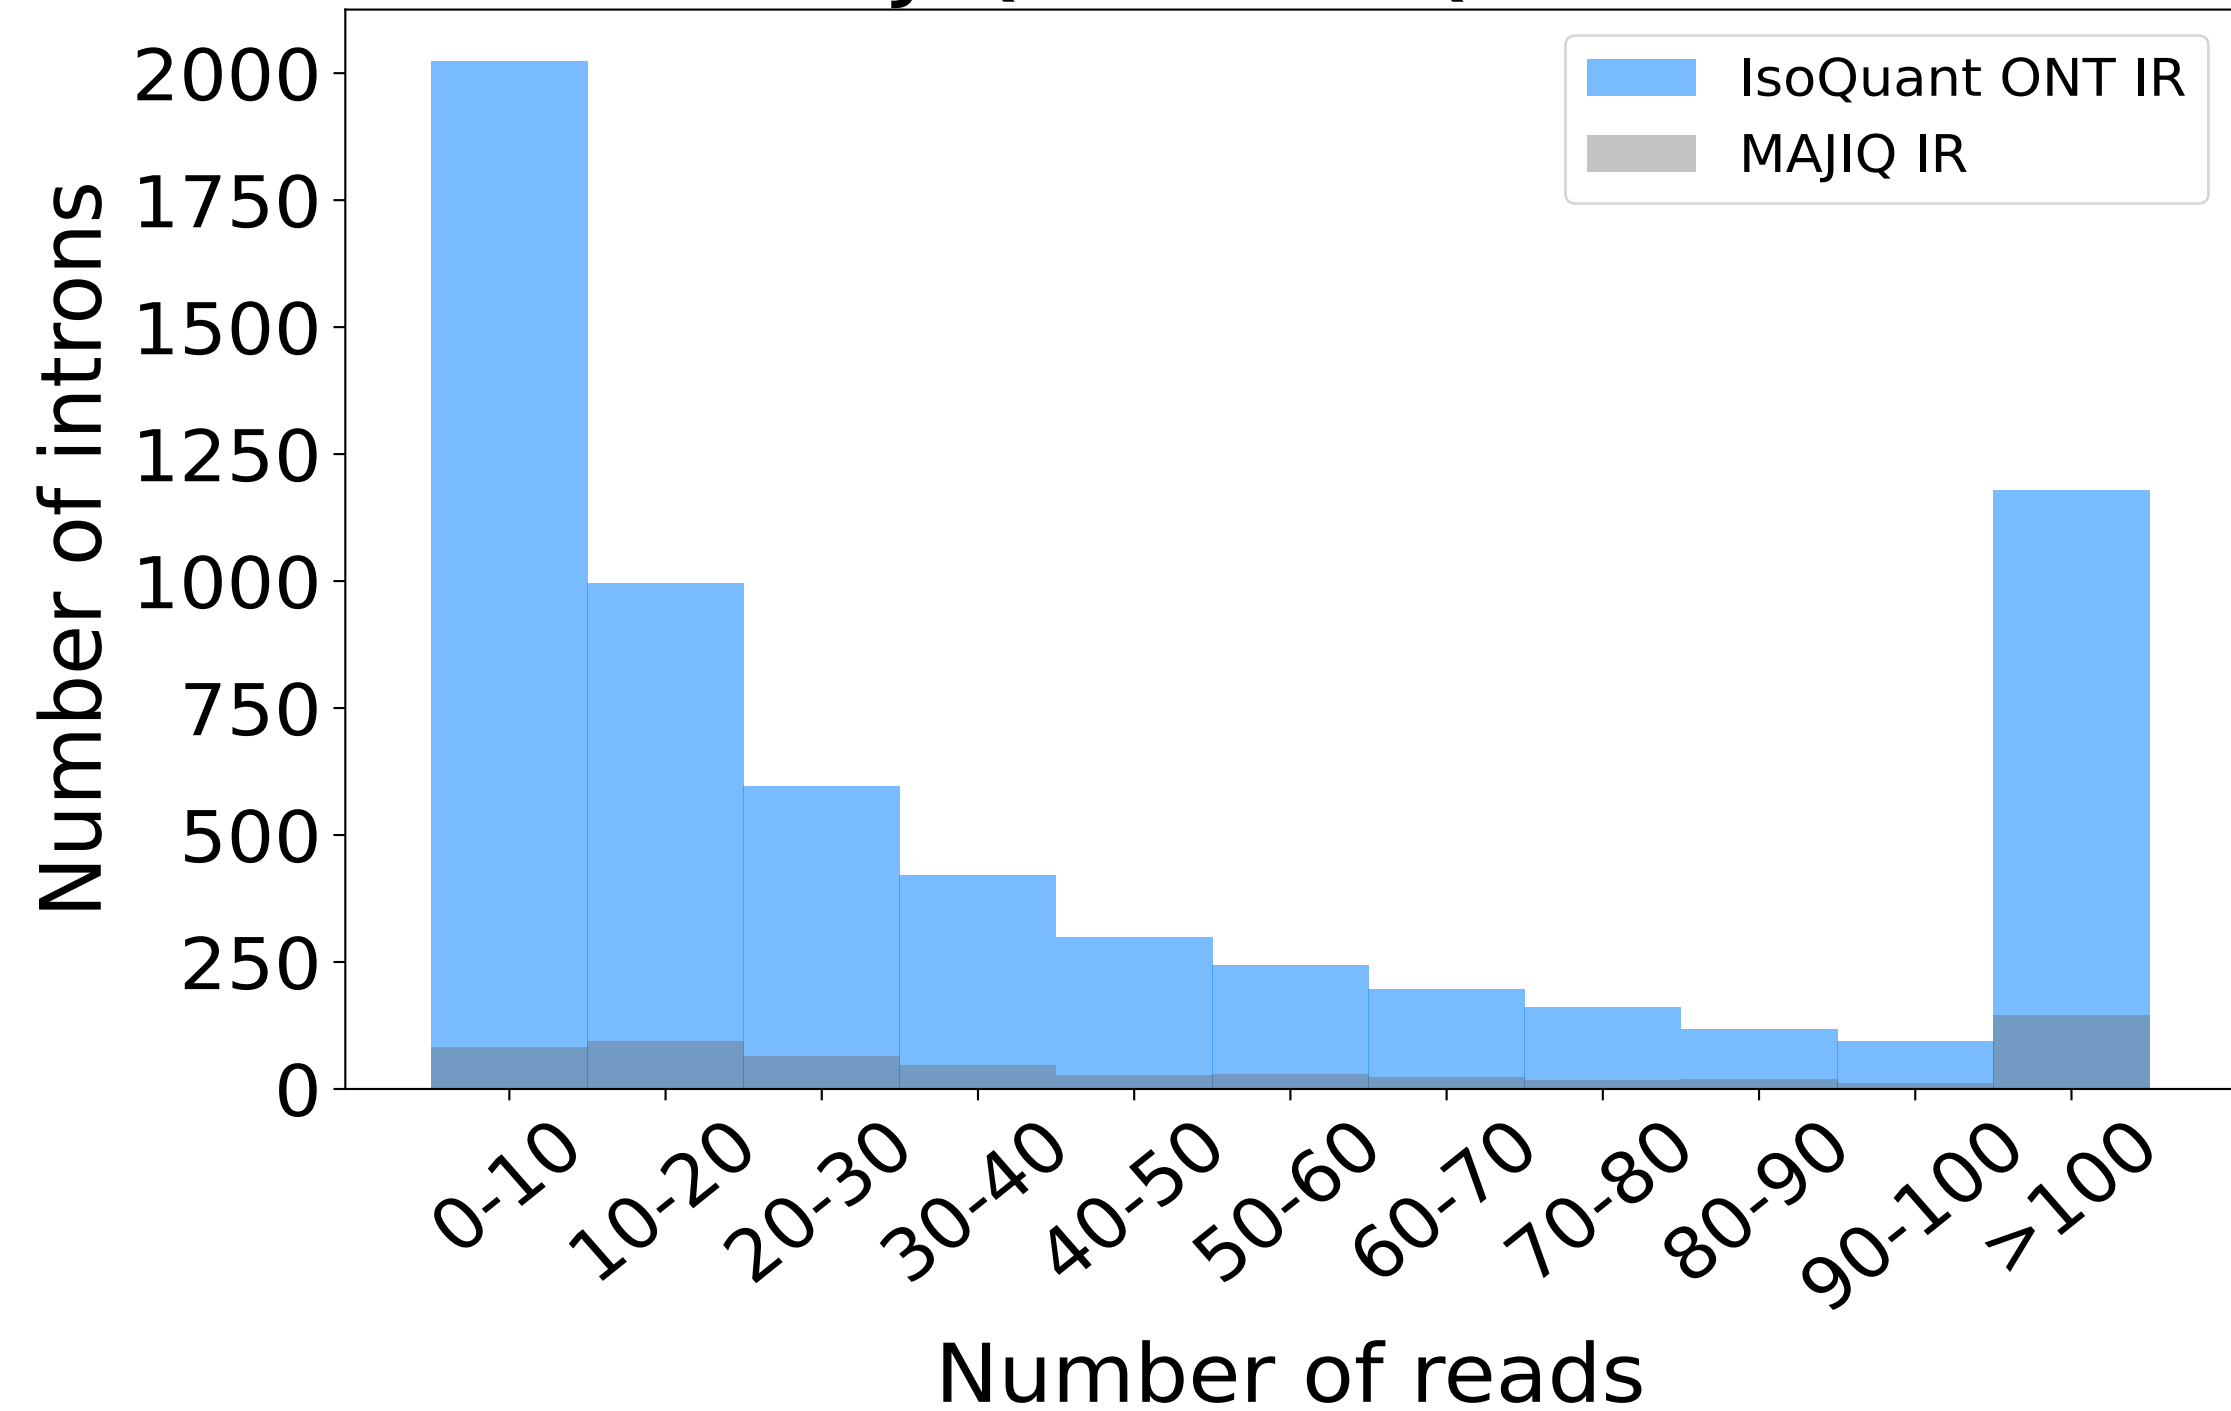

Supplement: Supplemental_code.zip [file Fig_5.pdf › Supplemental_code/figures/Fig_5/Fig_5.pdf]
