# Supplementary material for: Contrasting and combining transcriptome complexity captured by short and long RNA sequencing reads
Source: HighWire-hosted journal article supplement (doi:10.1101/gr.278659.123), 2024-09-25
Supplement: Supplemental_code.zip [file Fig_6.pdf › Supplemental_code/figures/Fig_6/Fig_6.pdf]

Gene name: **SRSF11; 1:+:70205682-70253052;**  
Gene ID: **ENSG00000116754.14;**

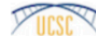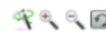

☐ DB & SR/LR  
 ☐ DB+SR+LR  
 ☐ SR+LR  
 ☐ LR only  
 ☐ DB+LR  
 ☐ SR only  
 ☐ DB+SR  
 ☐ DB only  
 ☐ SR/LR reads  
 ☐ Intron Ret.  
 ☐ DB TSS  
 ☐ DB TES

☒ Show All  
 ☐ SR Relevant  
 ☐ LR Relevant  
 ☐ SR or LR Relevant

Group: ENCFF766OAK; Experiment: ENCFF766OAK\_val;

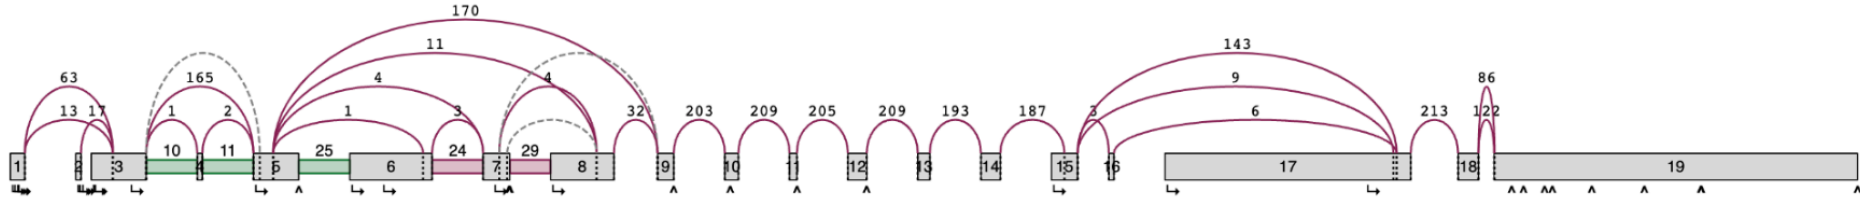

Group: combined; Experiment: combined;

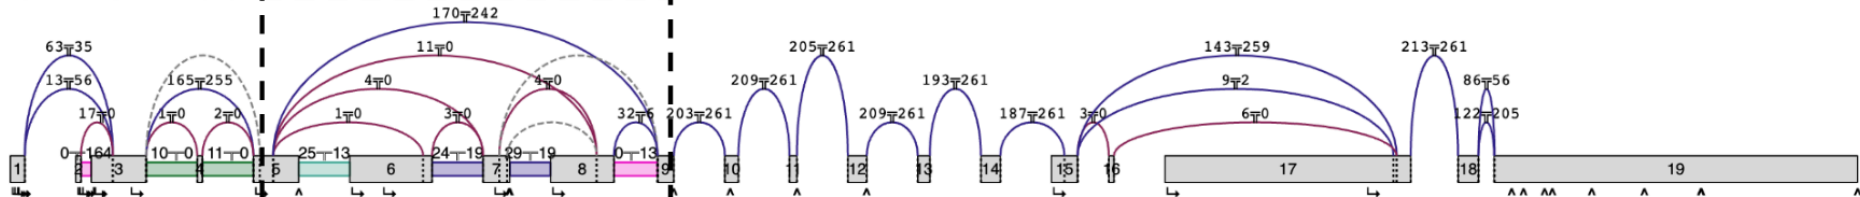

Group: Long Reads; Experiment: transcript\_8089.chr1.known; Transcript Total Reads: 56

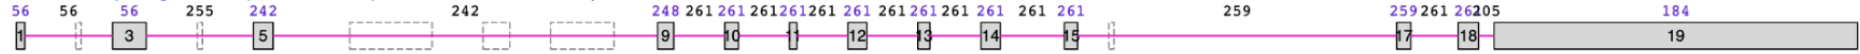

Group: Long Reads; Experiment: transcript\_8091.chr1.known; Transcript Total Reads: 35

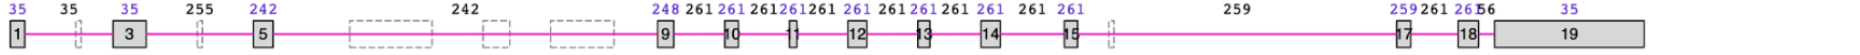

Group: Long Reads; Experiment: transcript\_8143.chr1.nic; Transcript Total Reads: 13

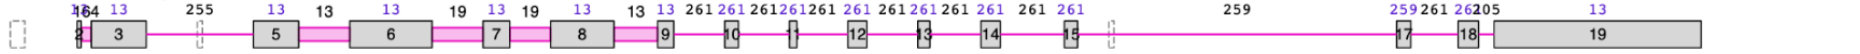

Group: Long Reads; Experiment: transcript\_8148.chr1.known; Transcript Total Reads: 6

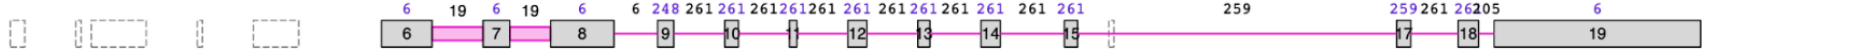

Show 10 entries

Search:

| Highlight                                                               | LSV ID                                 | LSV Type | $\Psi$ per Junction | LR $\Psi$ per Junction | Links                        |
|-------------------------------------------------------------------------|----------------------------------------|----------|---------------------|------------------------|------------------------------|
| Highlight <input type="checkbox"/><br>Weighted <input type="checkbox"/> | ENSG00000116754.14:s:70228422-70228727 |          |                     |                        | <a href="#">Copy LSV</a><br> |
| Highlight <input type="checkbox"/><br>Weighted <input type="checkbox"/> | ENSG00000116754.14:t:70232268-70232377 |          |                     |                        | <a href="#">Copy LSV</a><br> |
