# Supplementary material for: Contrasting and combining transcriptome complexity captured by short and long RNA sequencing reads
Source: HighWire-hosted journal article supplement (doi:10.1101/gr.278659.123), 2024-09-25

A

FLAIR LSV non-quantifiability

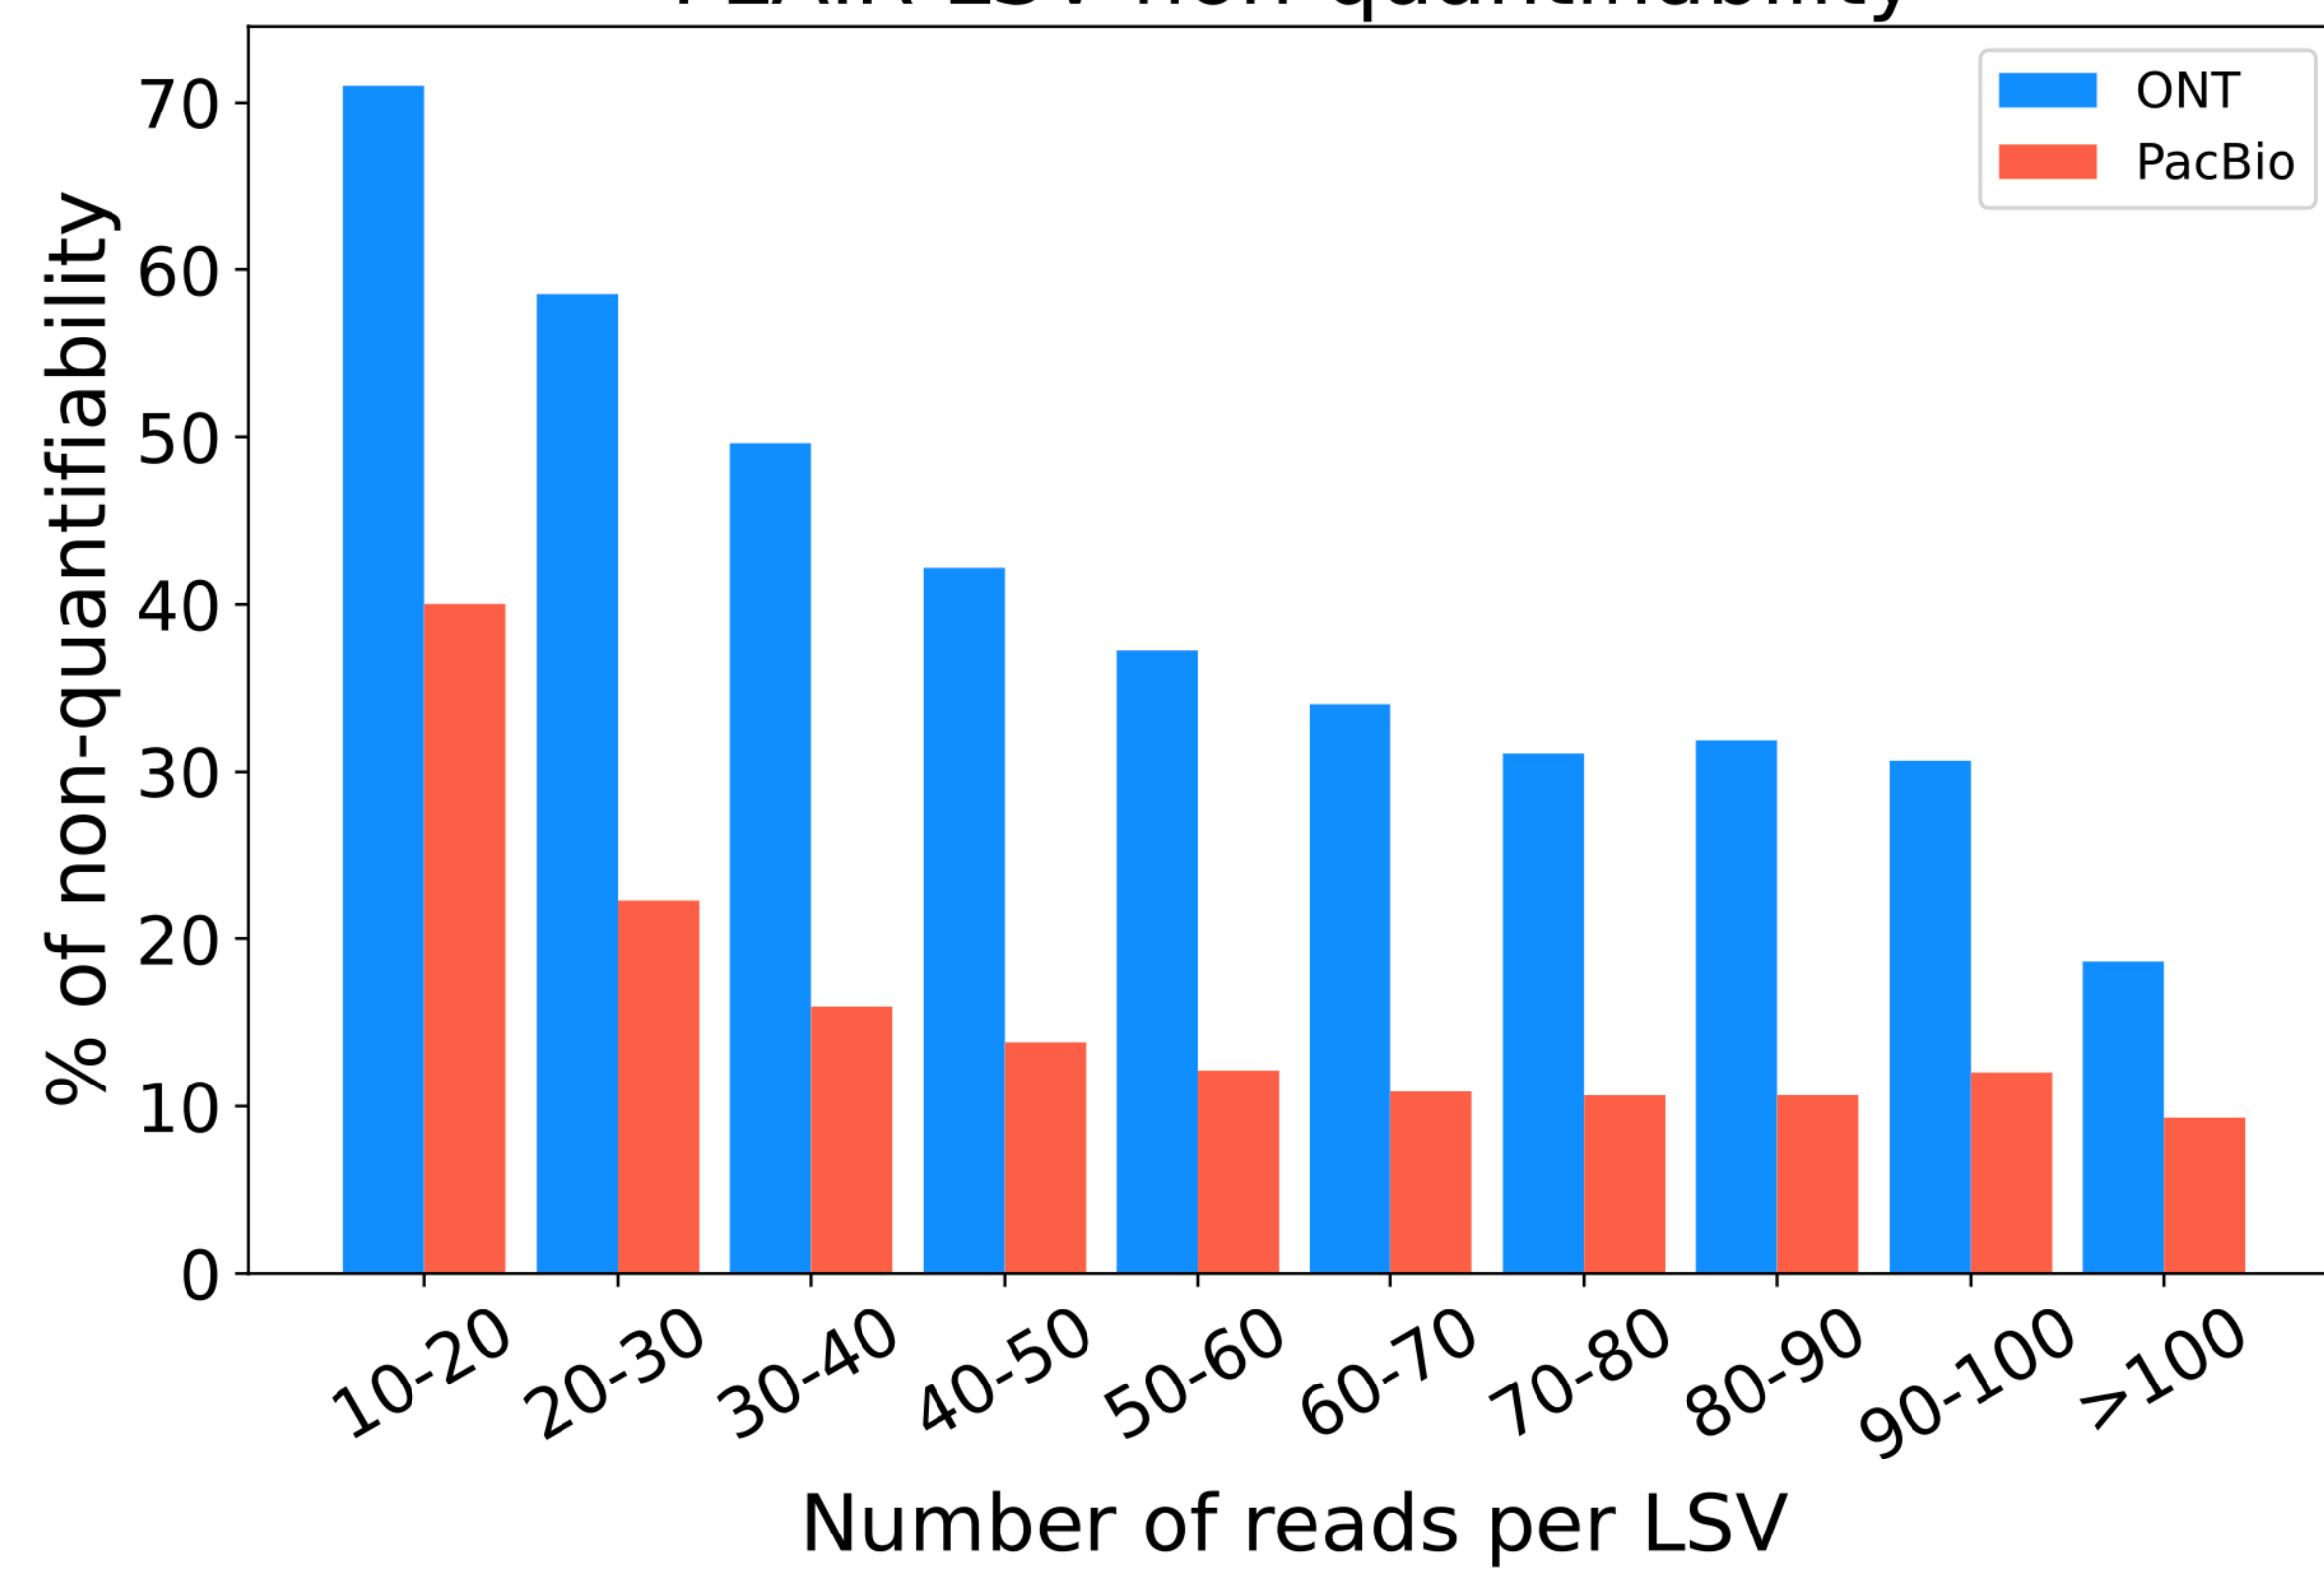

B

FLAIR LSV non-quantifiability from 3' end

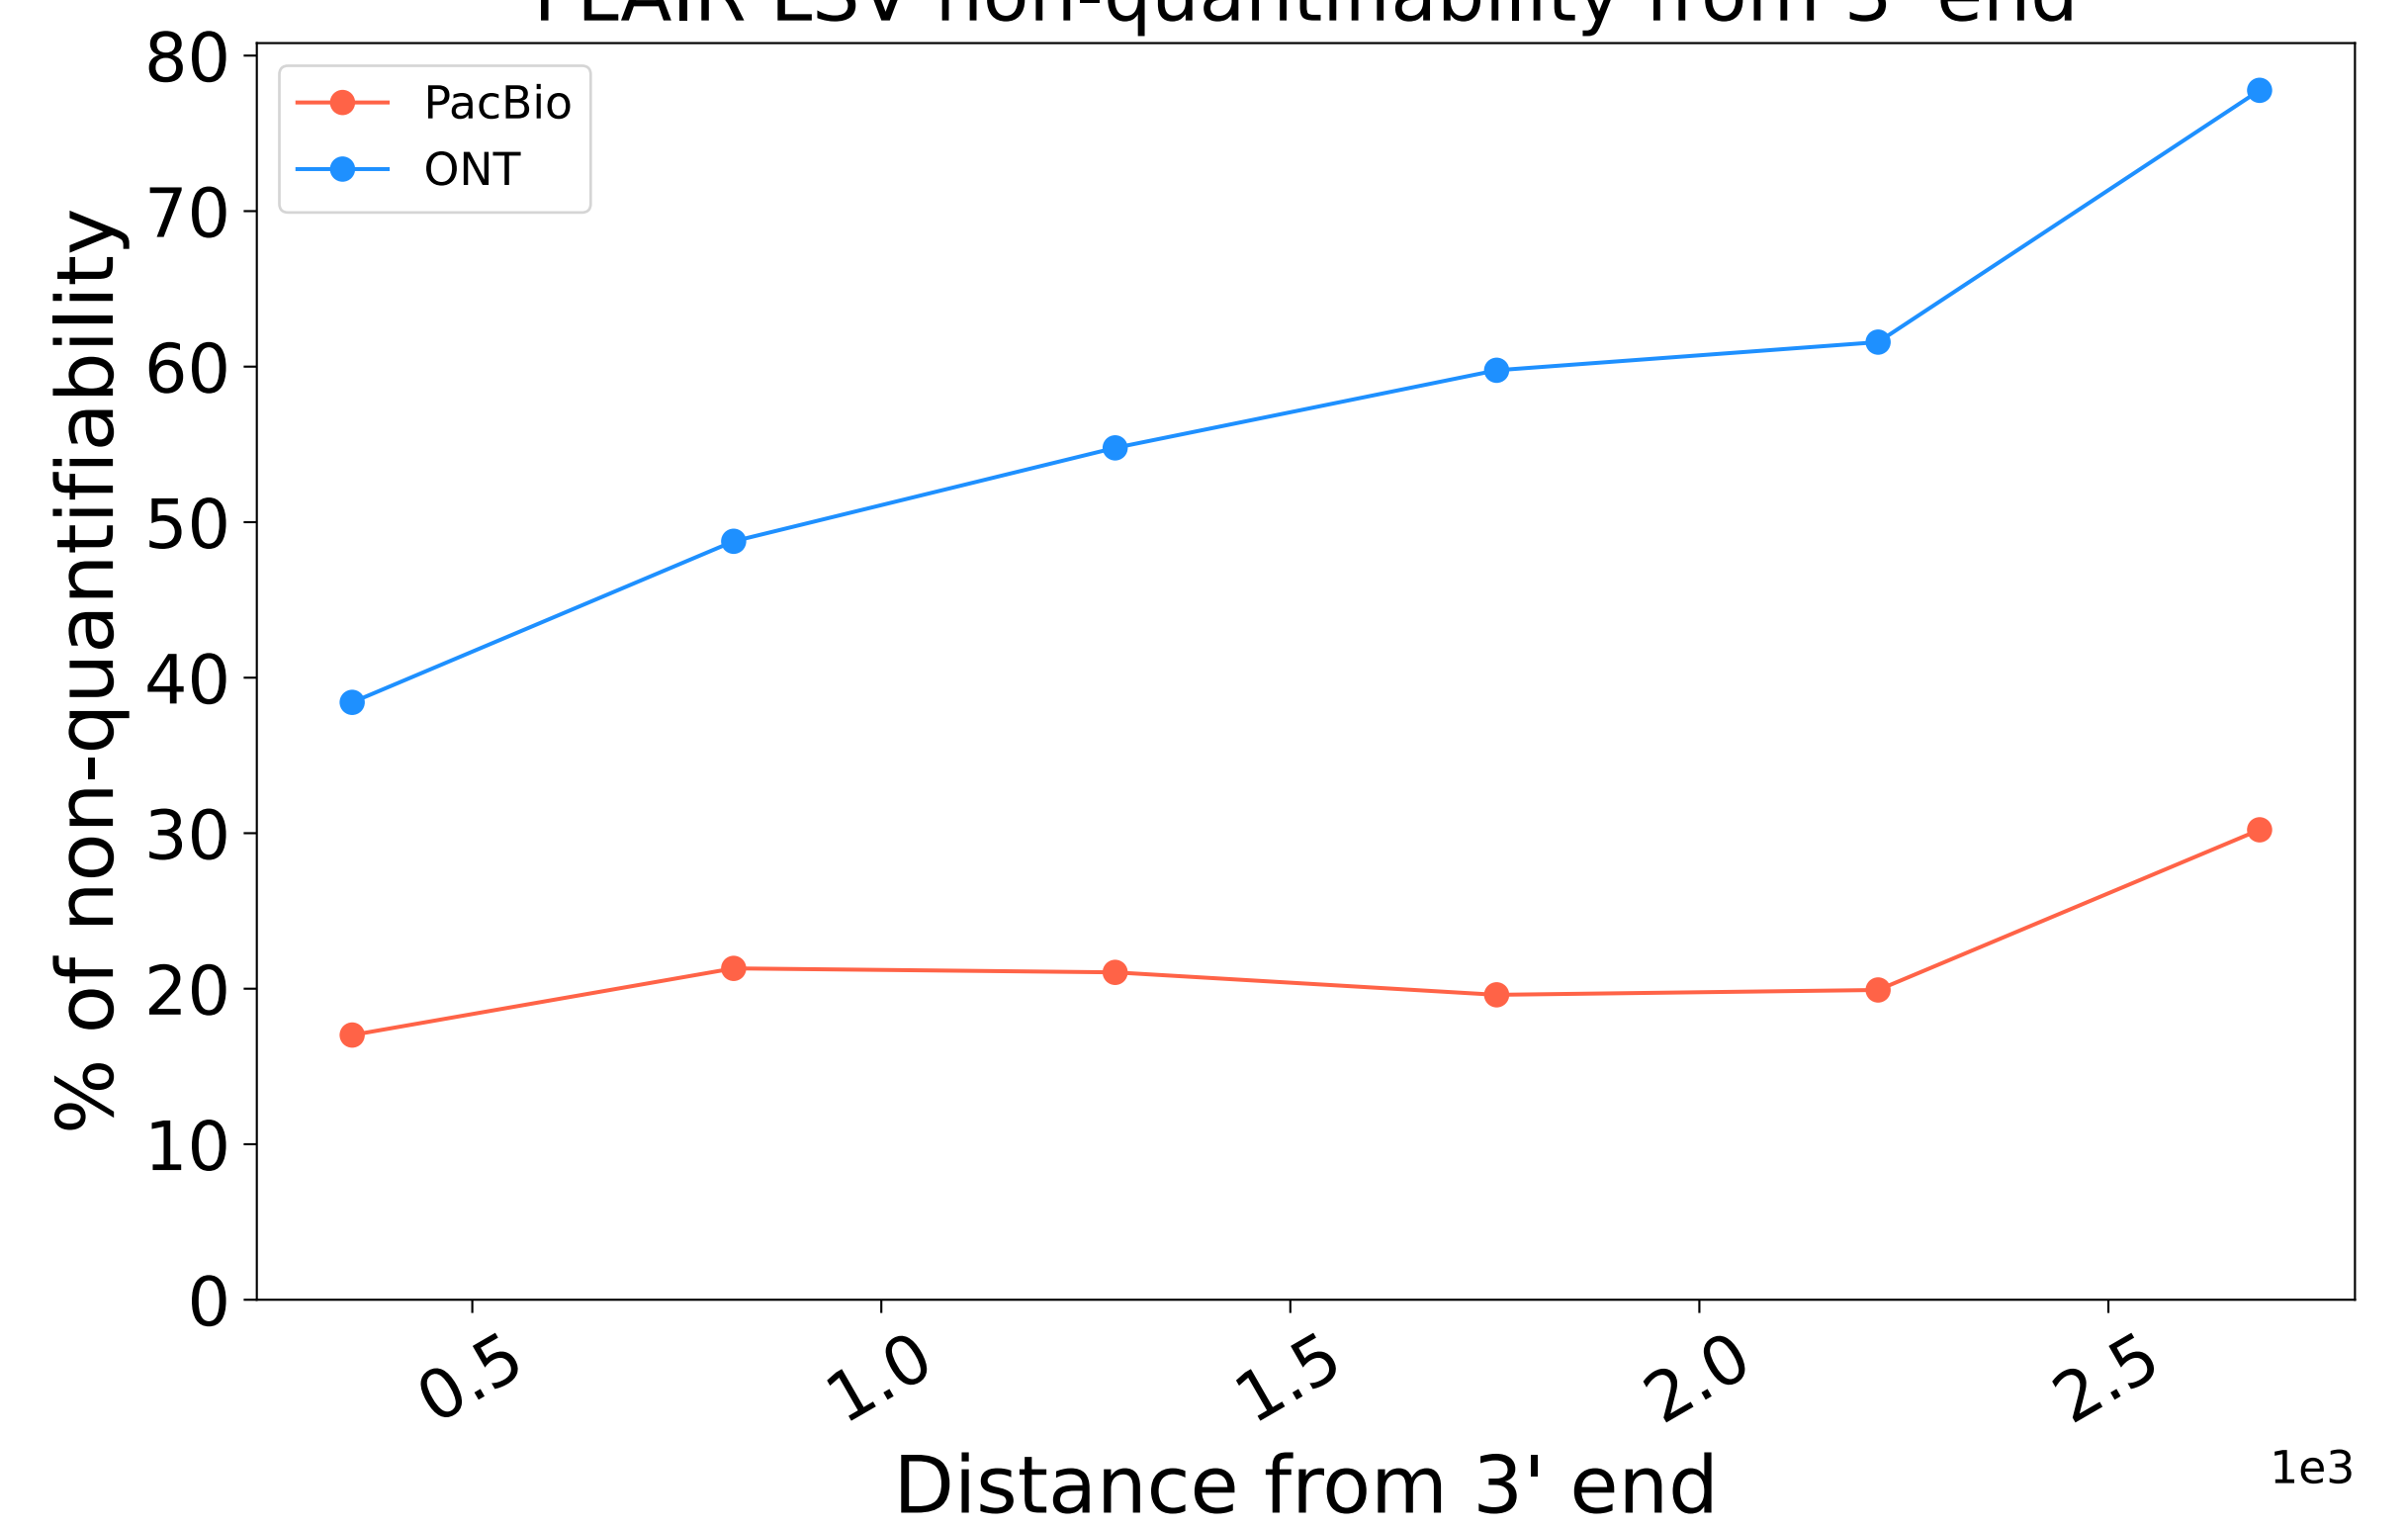

ESPRESSO LSV non-quantifiability

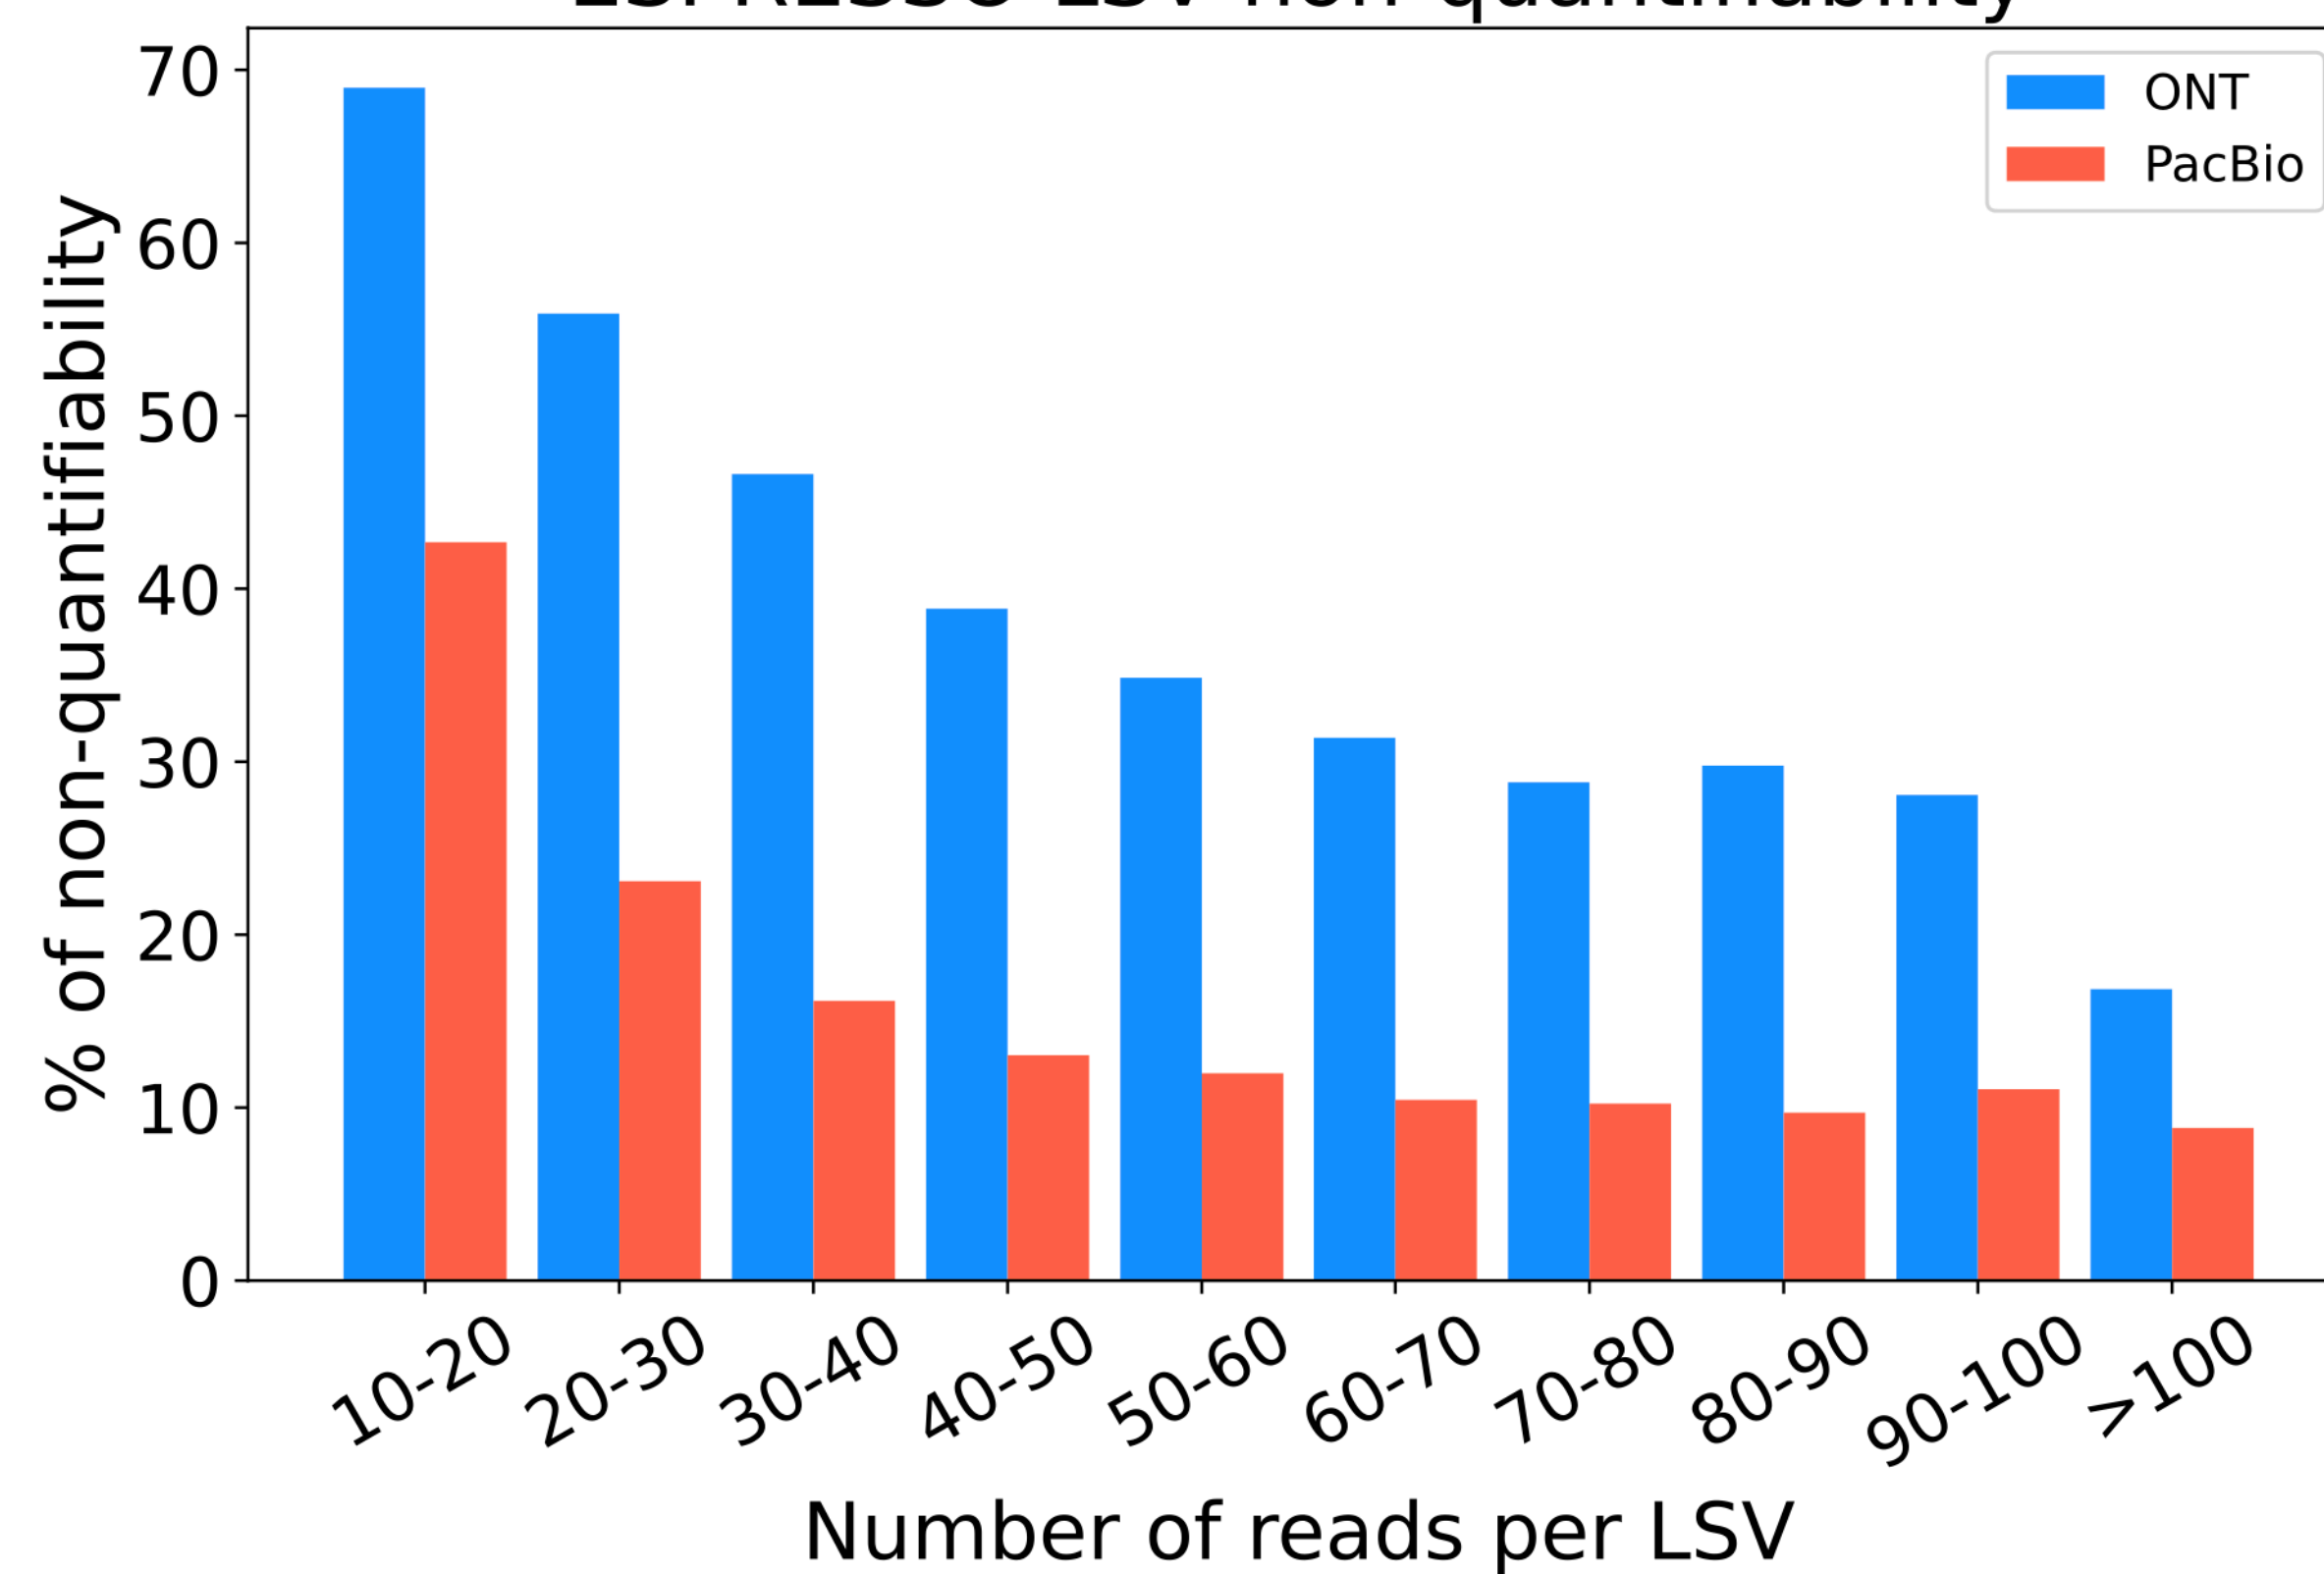

ESPRESSO LSV non-quantifiability from 3' end

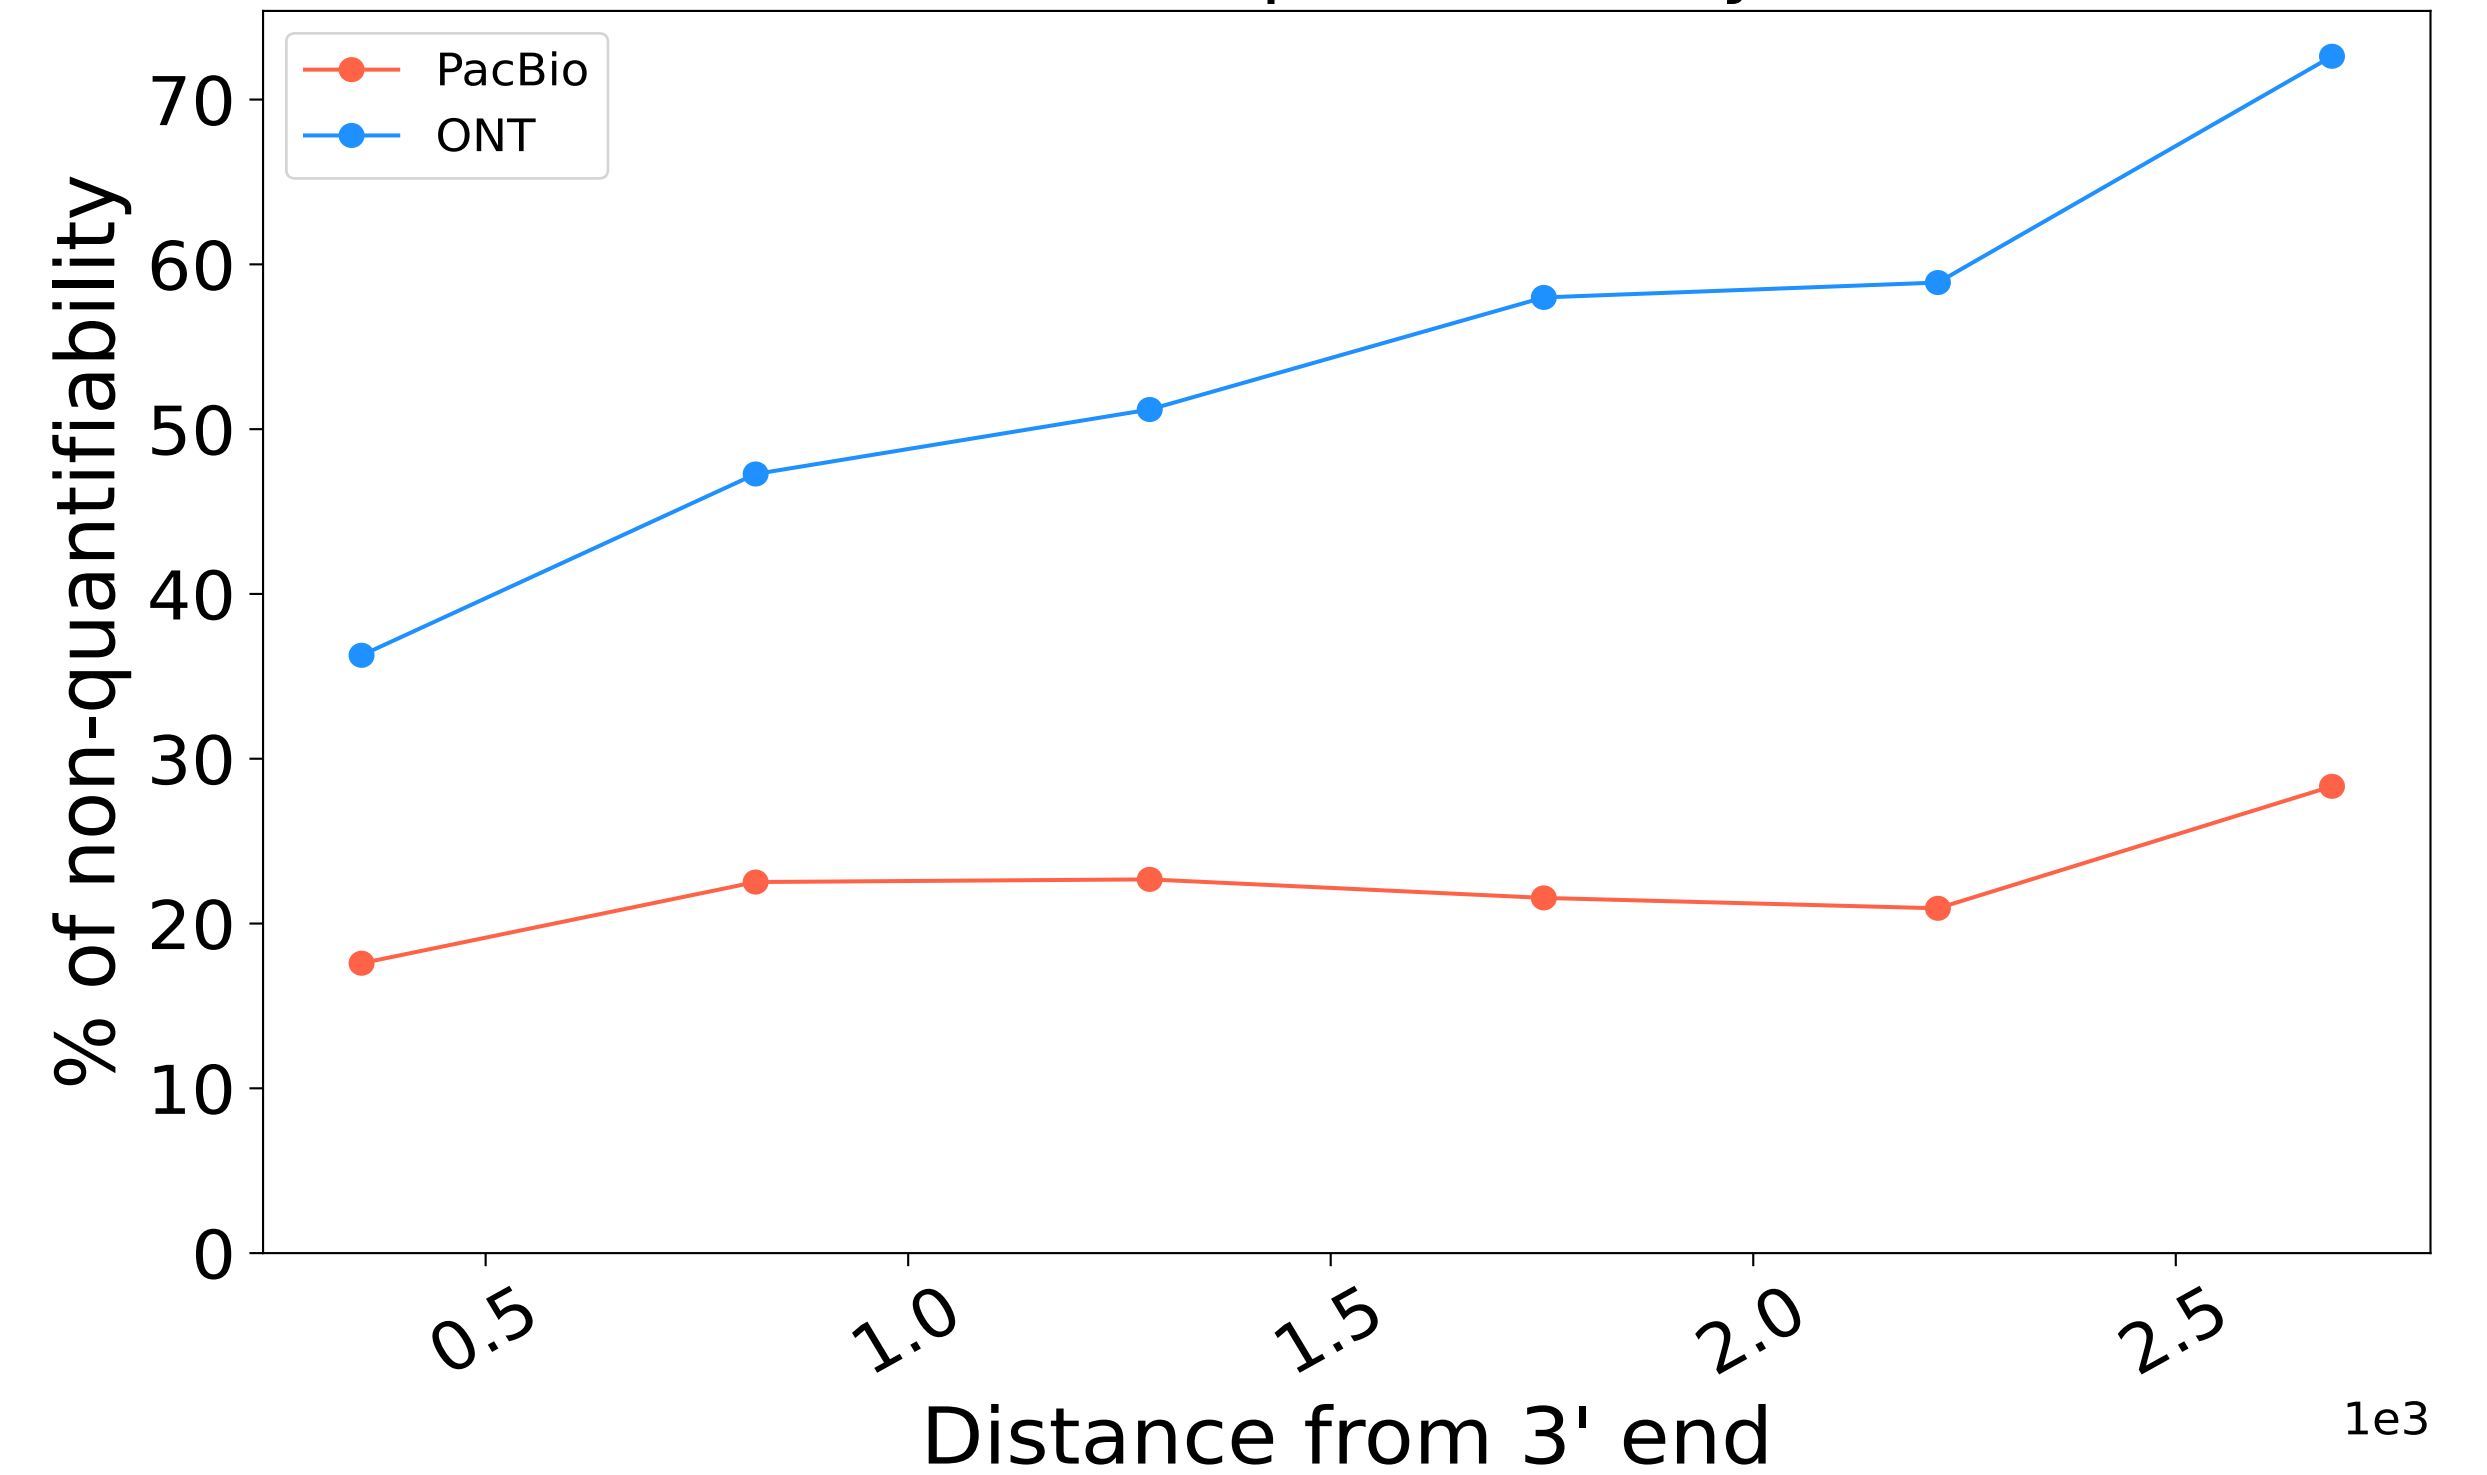

Bambu LSV non-quantifiability

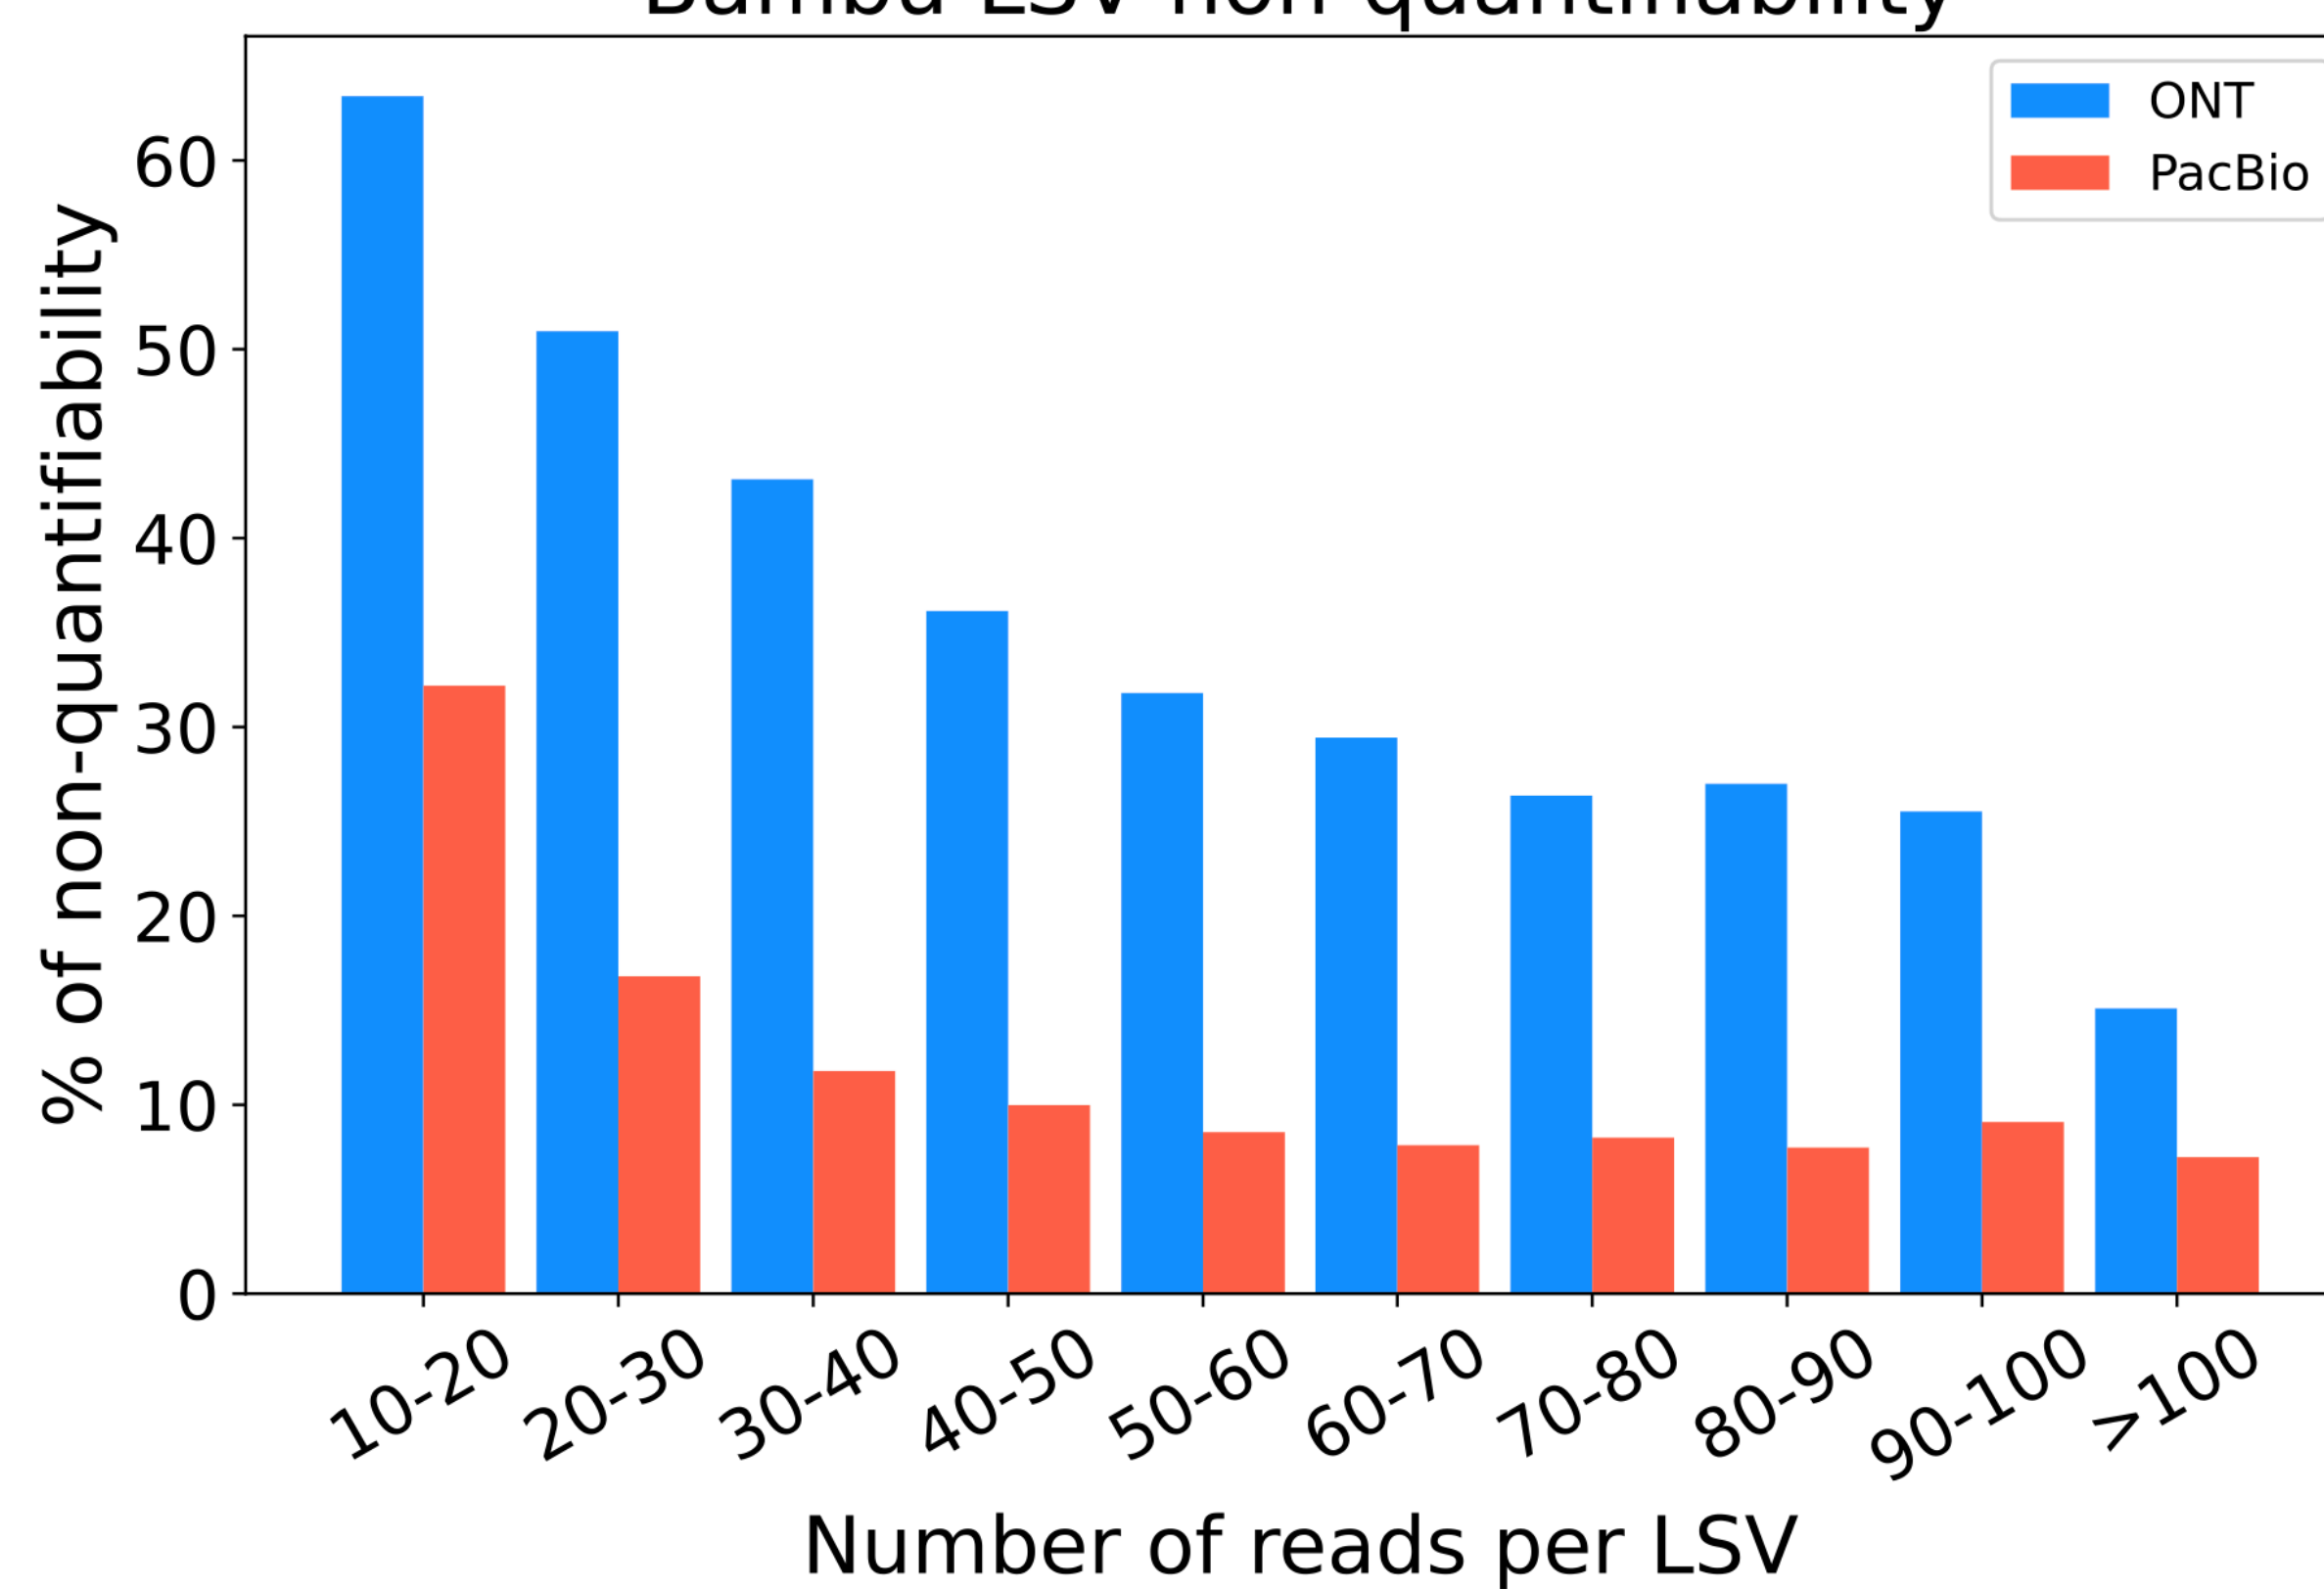

Bambu LSV non-quantifiability from 3' end

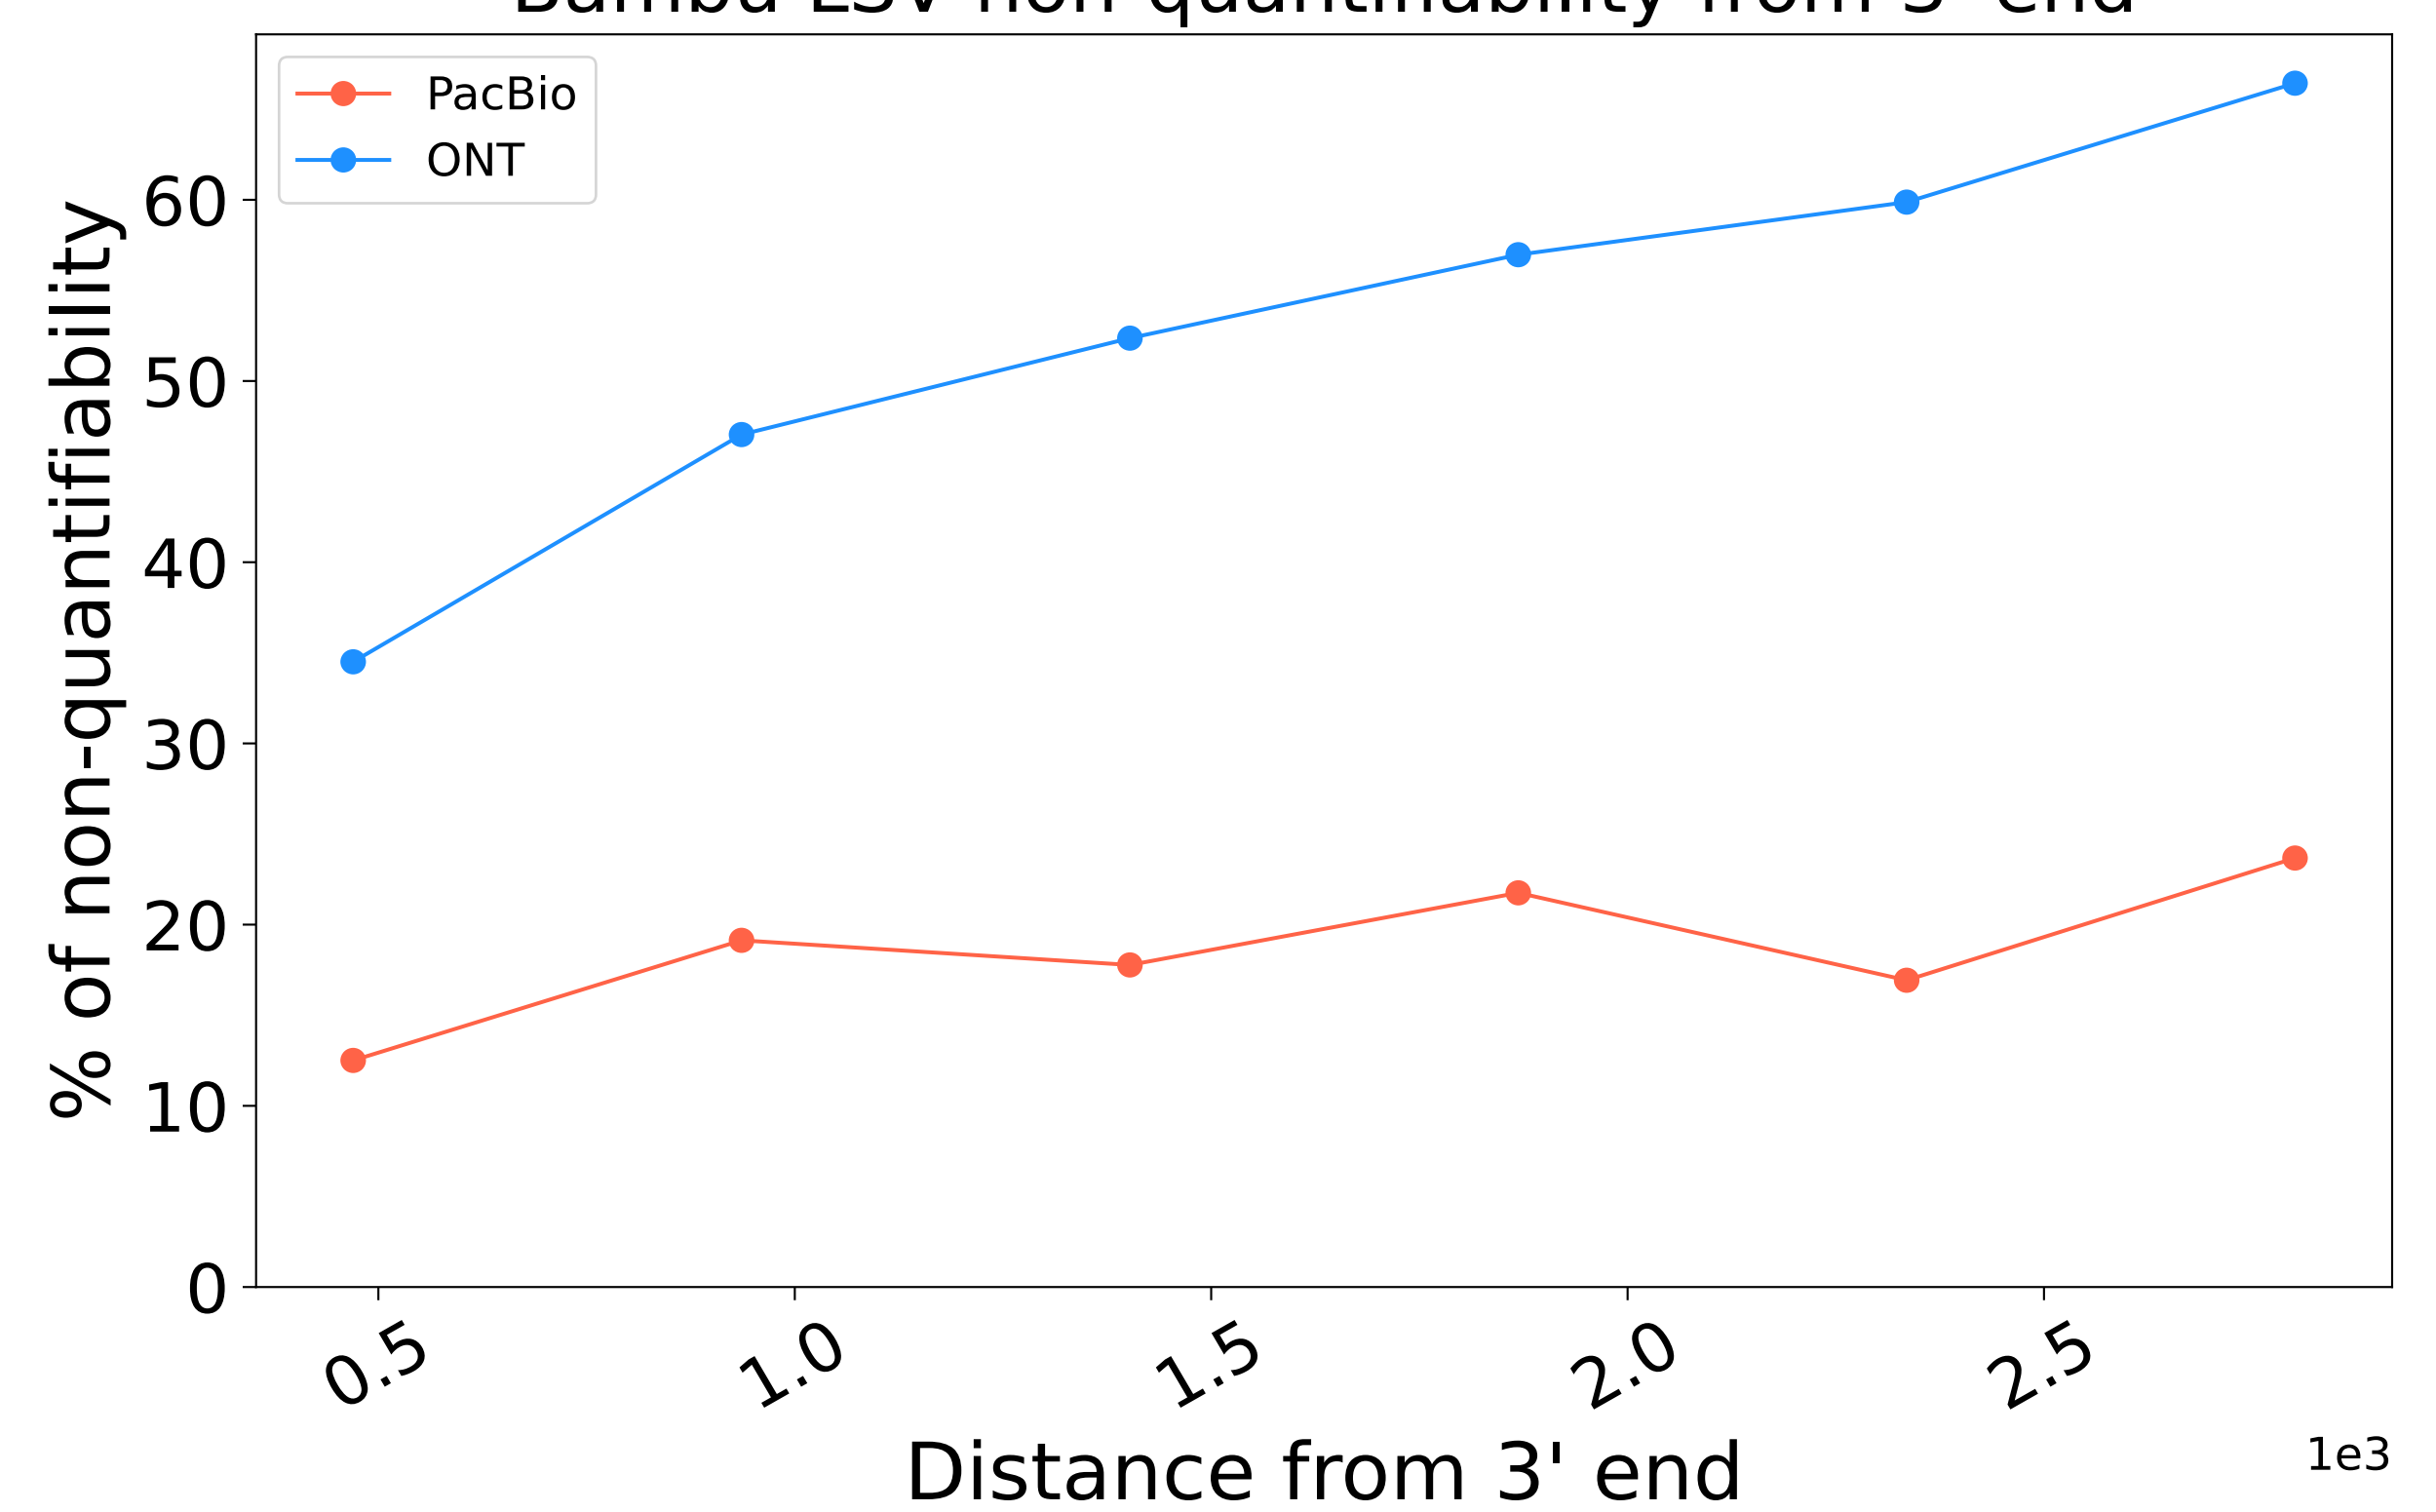

Supplement: Supplemental_code.zip [file Supplemental_Fig_S9.pdf › Supplemental_code/figures/Supplemental_Fig_S9/Supplemental_Fig_S9.pdf]
