# Supplementary material for: Contrasting and combining transcriptome complexity captured by short and long RNA sequencing reads
Source: HighWire-hosted journal article supplement (doi:10.1101/gr.278659.123), 2024-09-25

A

FLAIR and MAJIQ intron retention

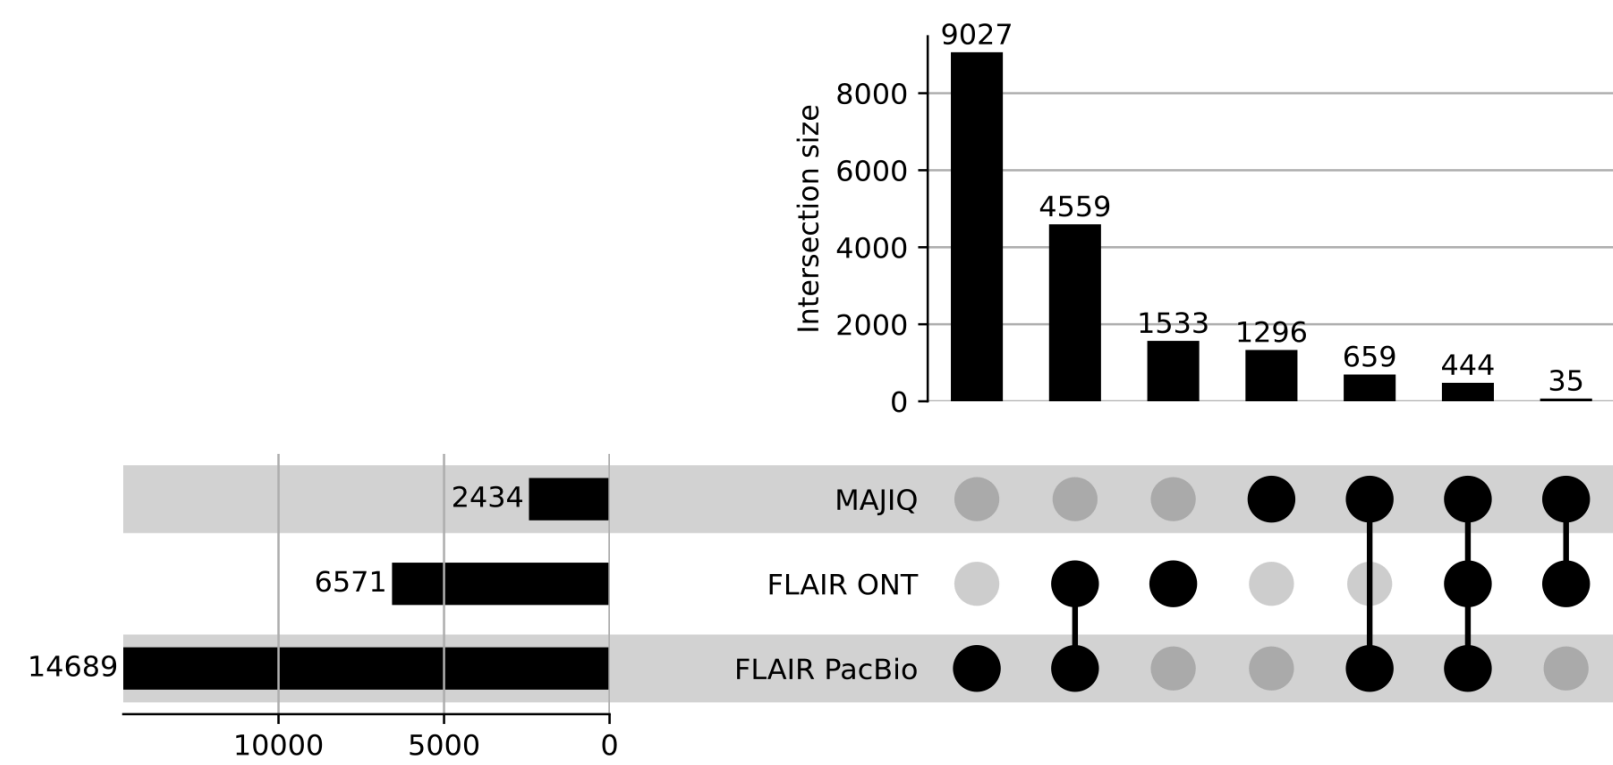

ESPRESSO and MAJIQ intron retention

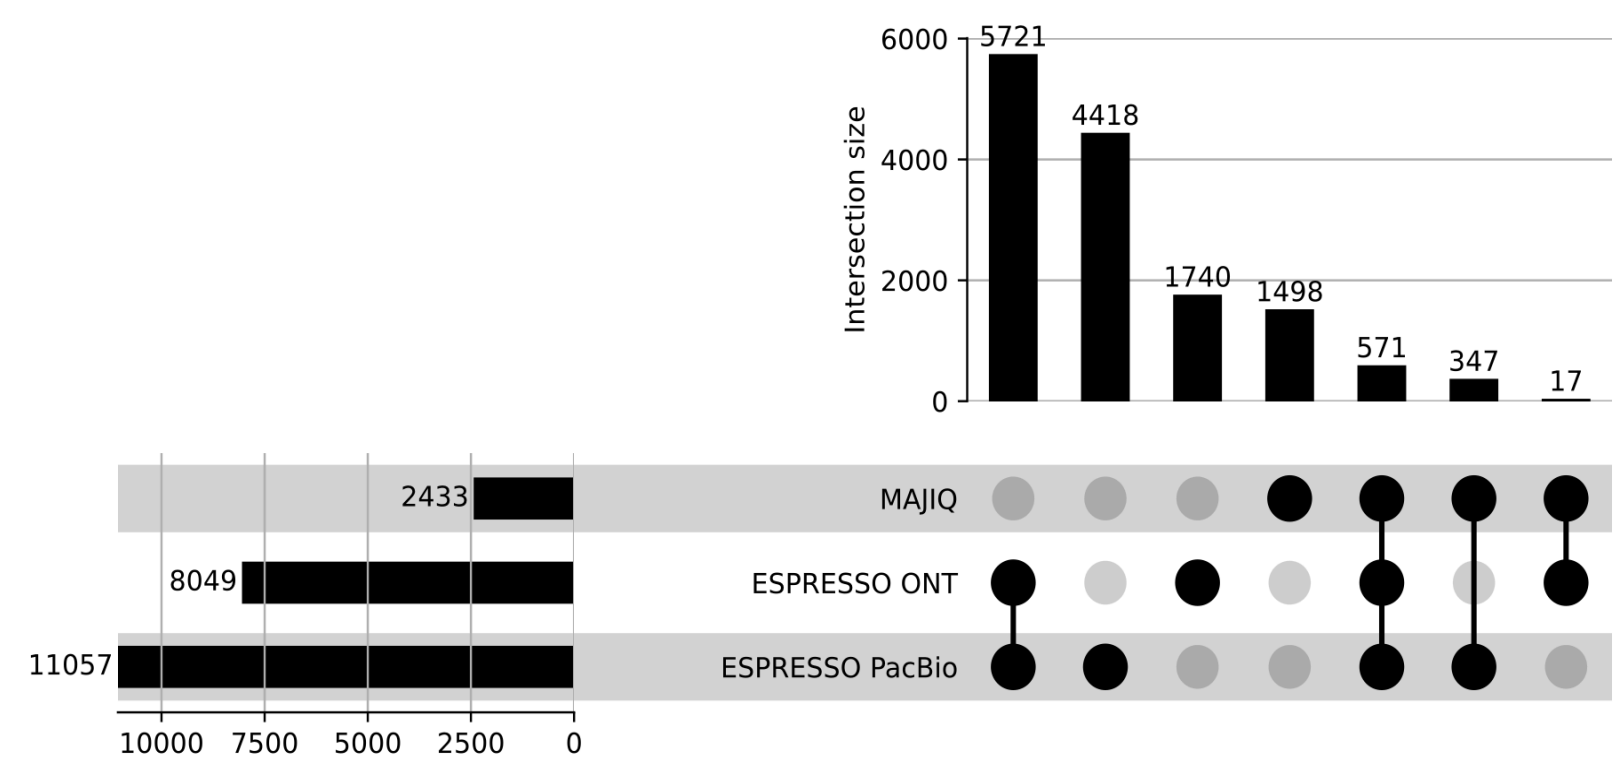

Bambu and MAJIQ intron retention

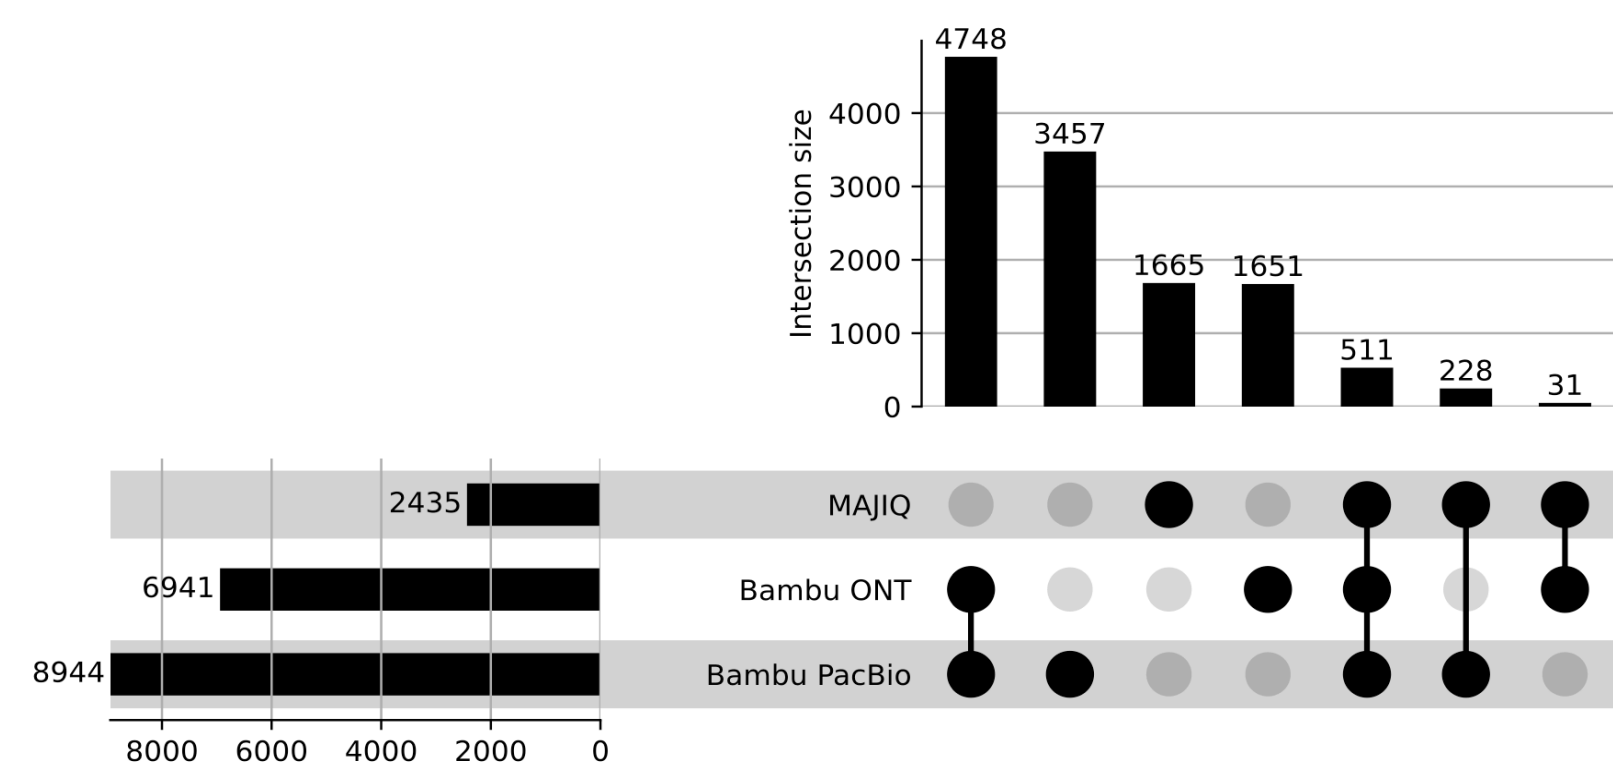

FLAIR and MAJIQ intron retention length comparison

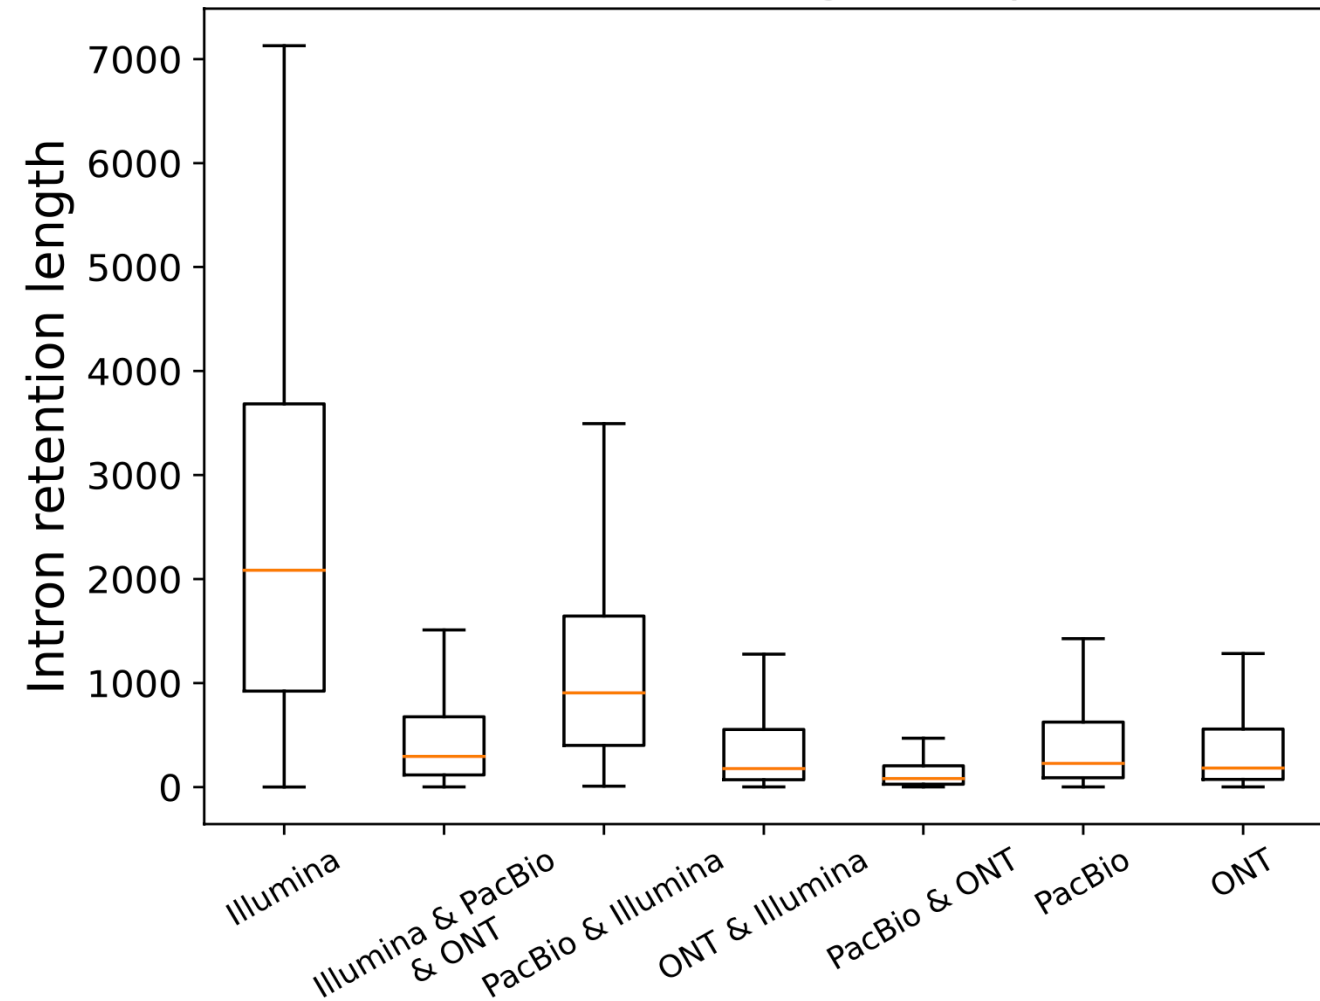

ESPRESSO and MAJIQ intron retention length comparison

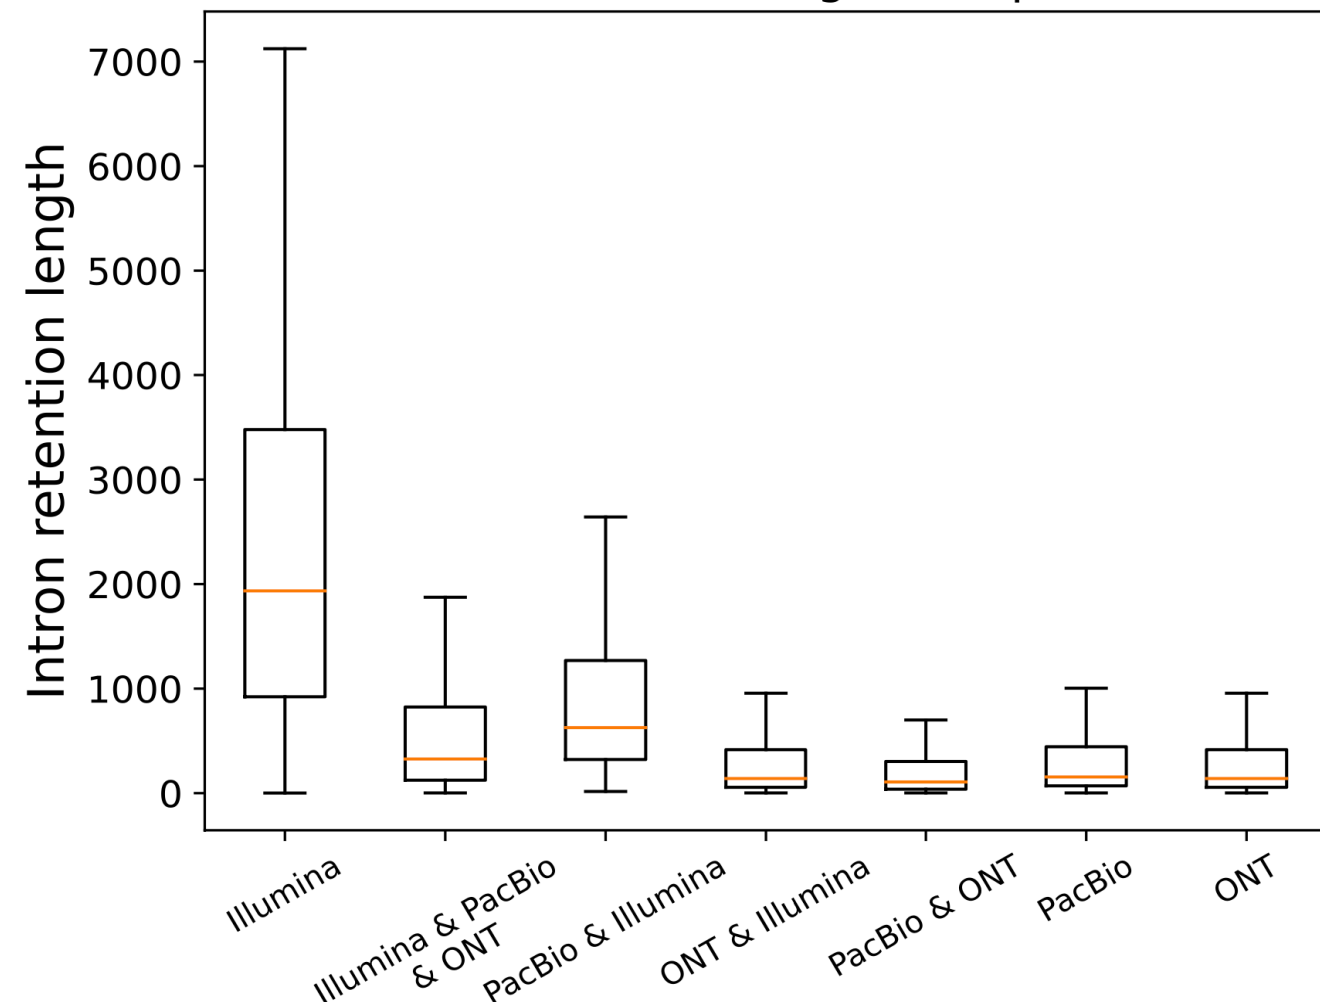

Bambu and MAJIQ intron retention length comparison

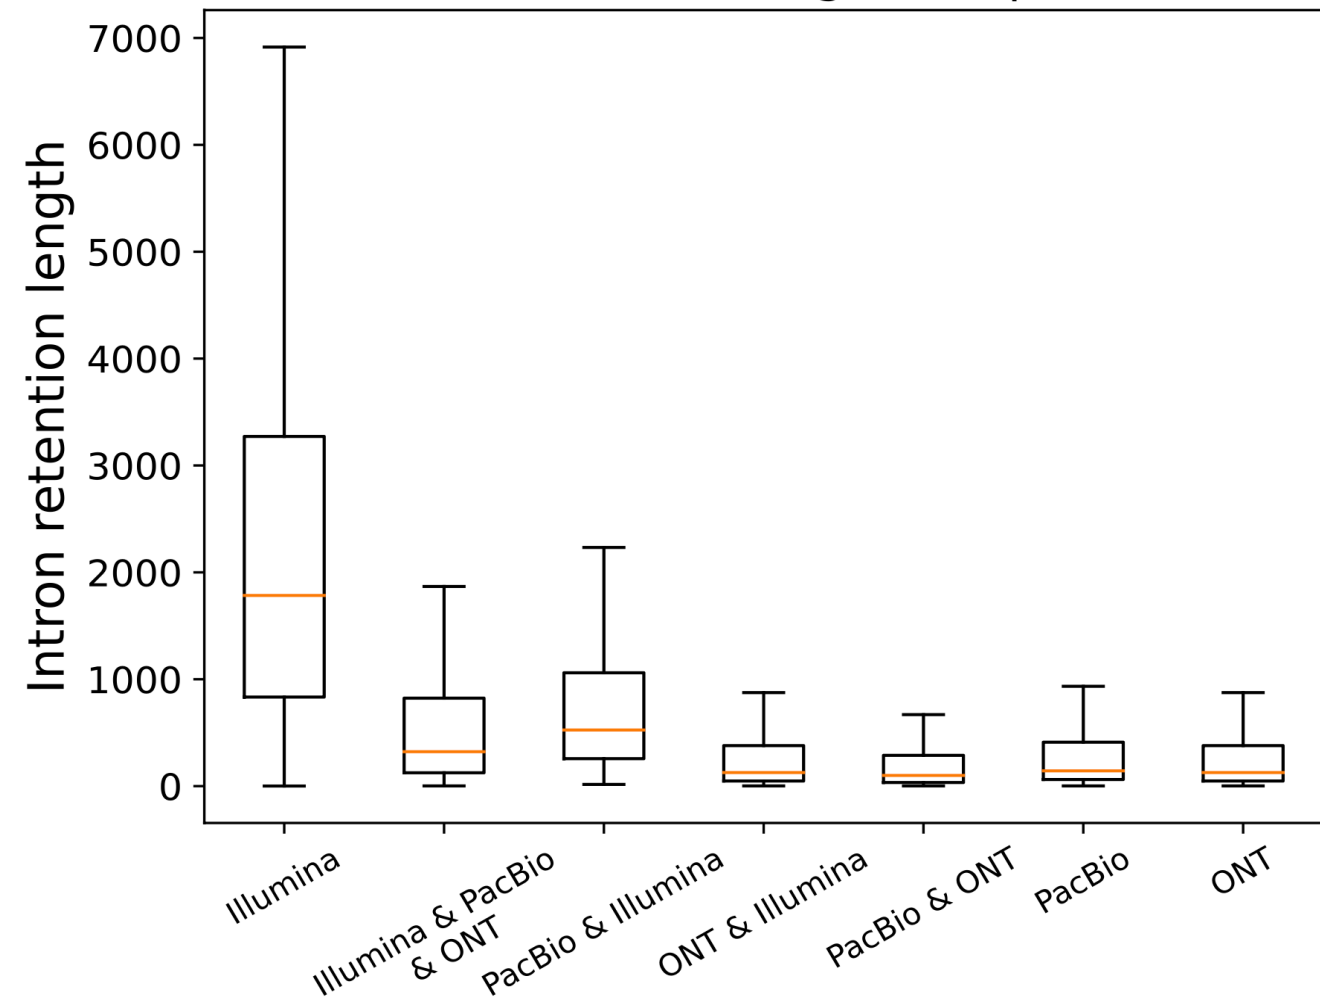

B

GTEx Heart atrial appendage FLAIR and MAJIQ intron retention

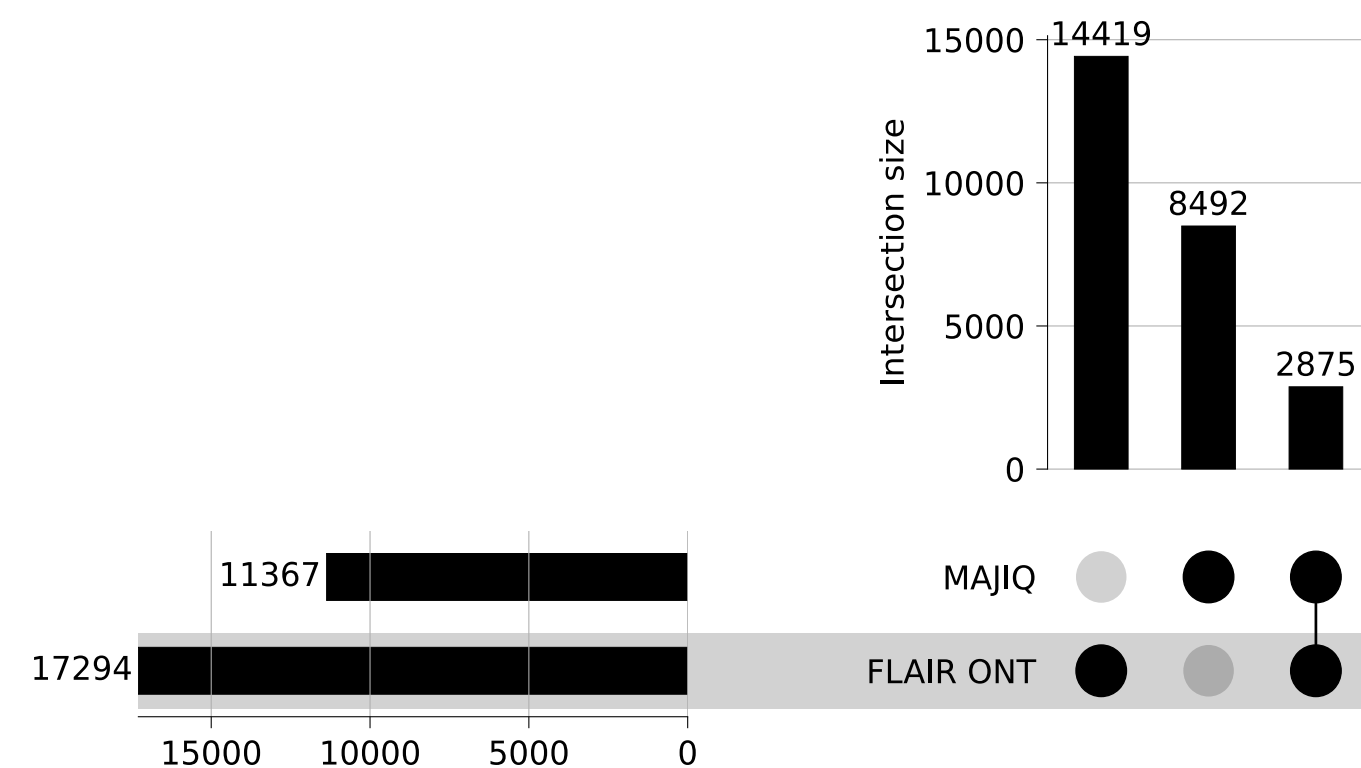

GTEx Brain frontal cortex FLAIR and MAJIQ intron retention

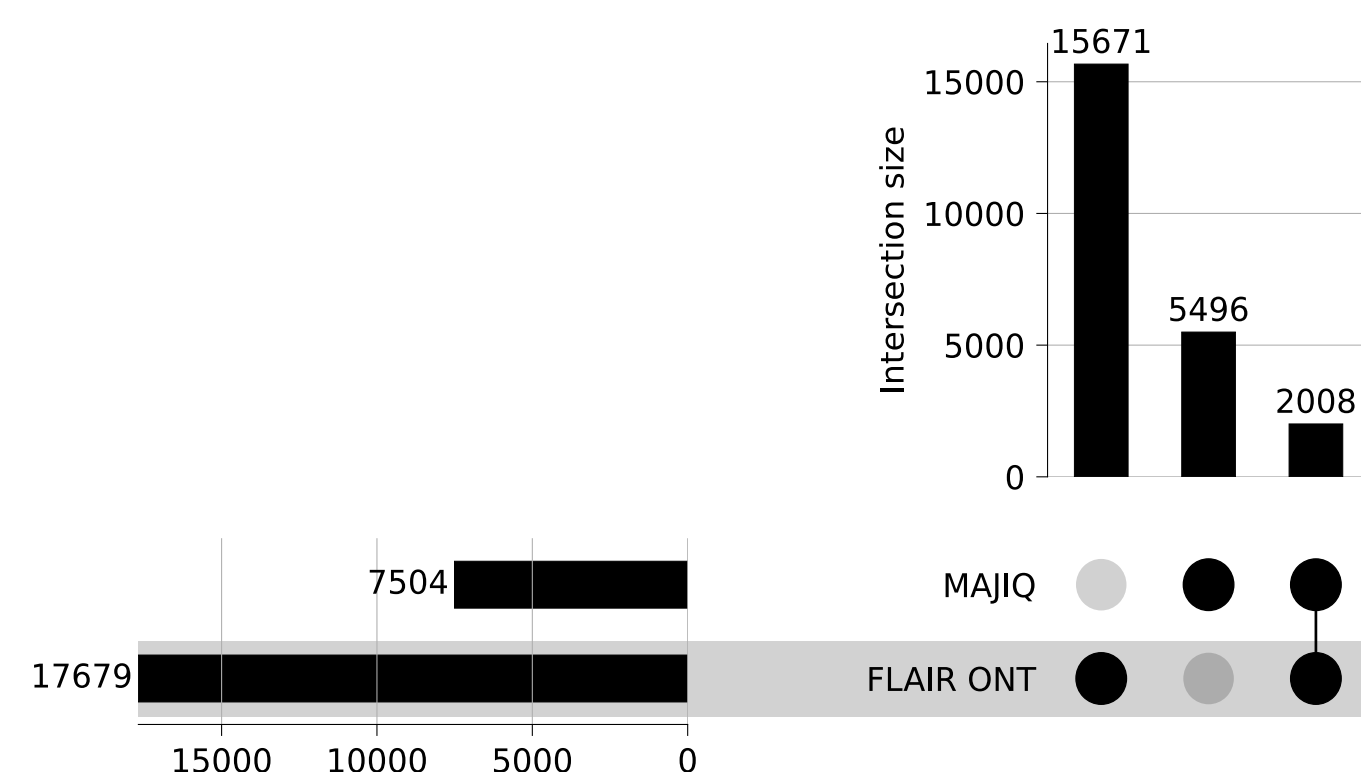

GTEx Liver FLAIR and MAJIQ intron retention

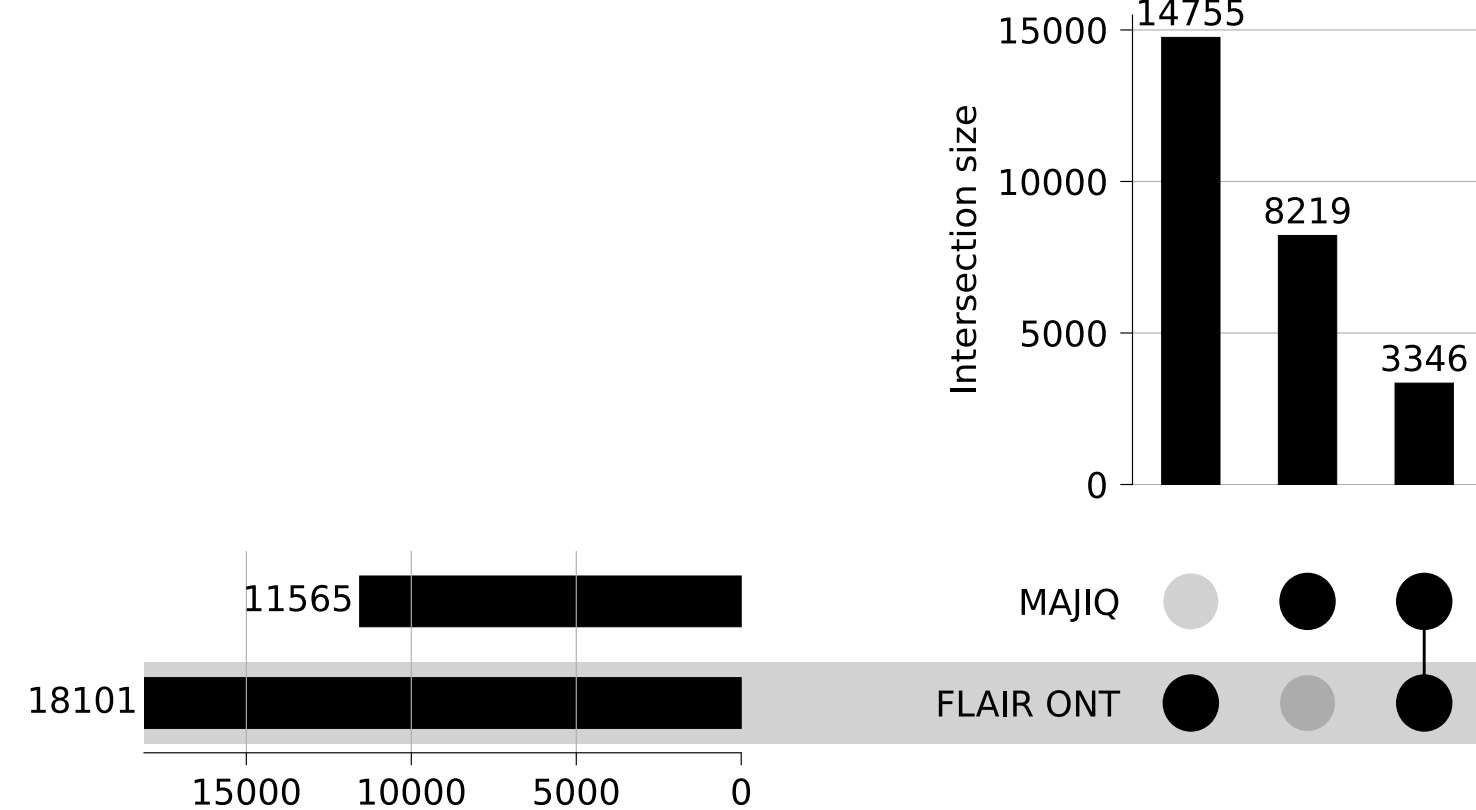

GTEx Heart atrial appendage FLAIR and MAJIQ intron retention length comparison

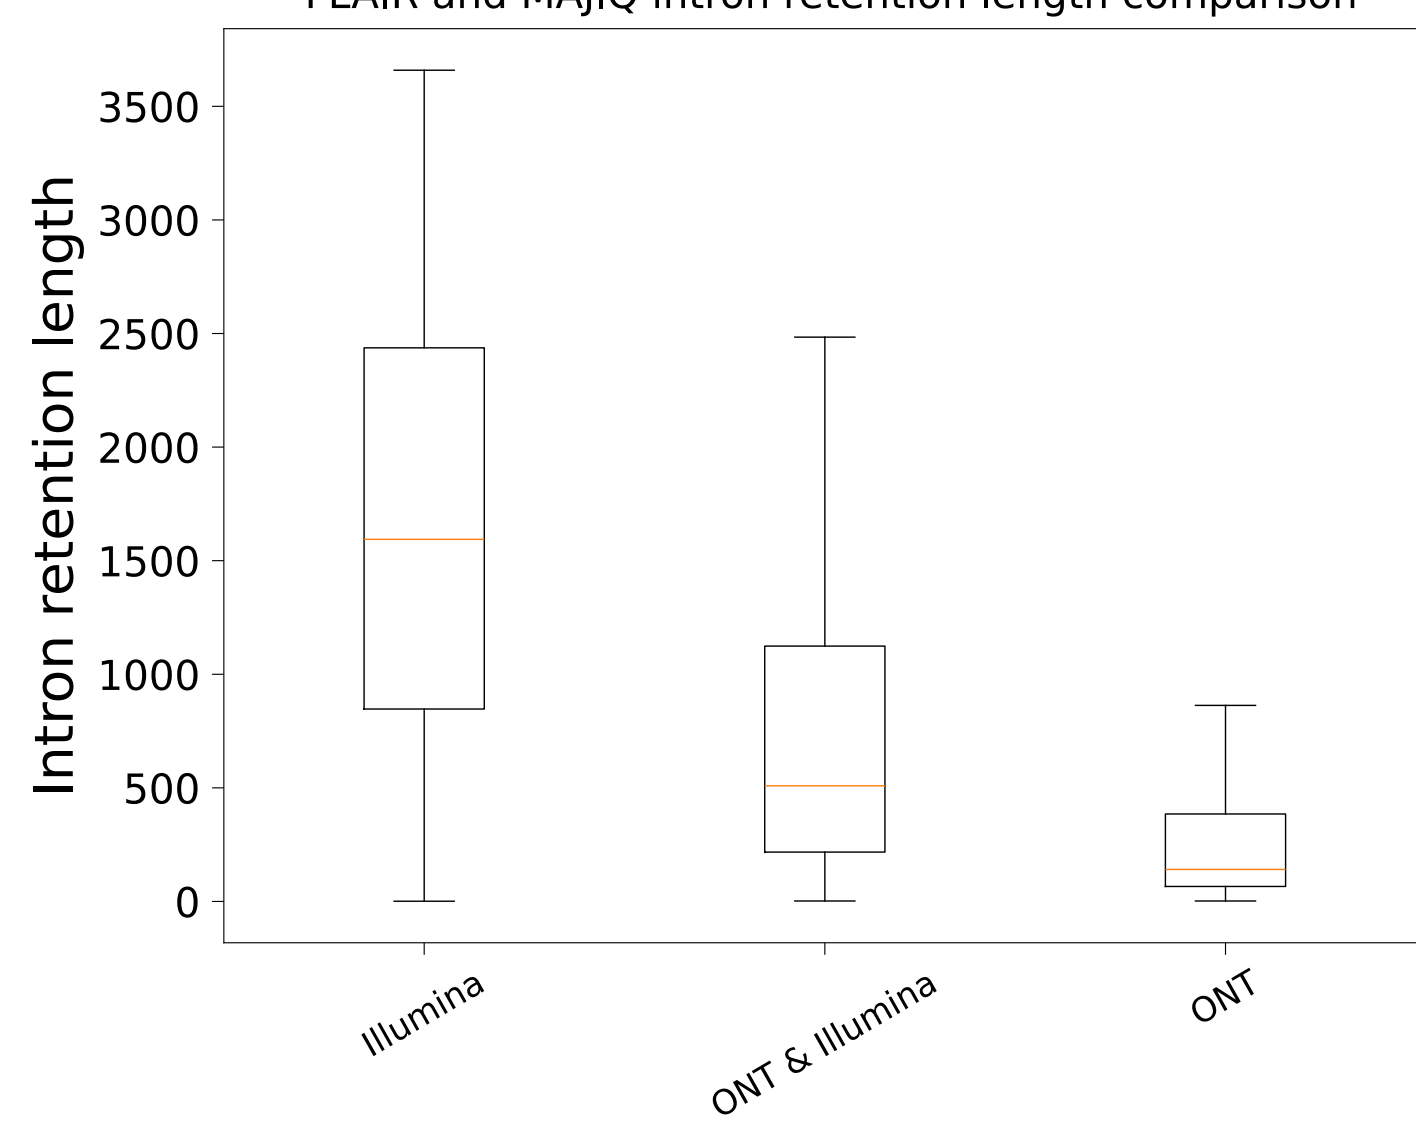

GTEx Brain frontal cortex FLAIR and MAJIQ intron retention length comparison

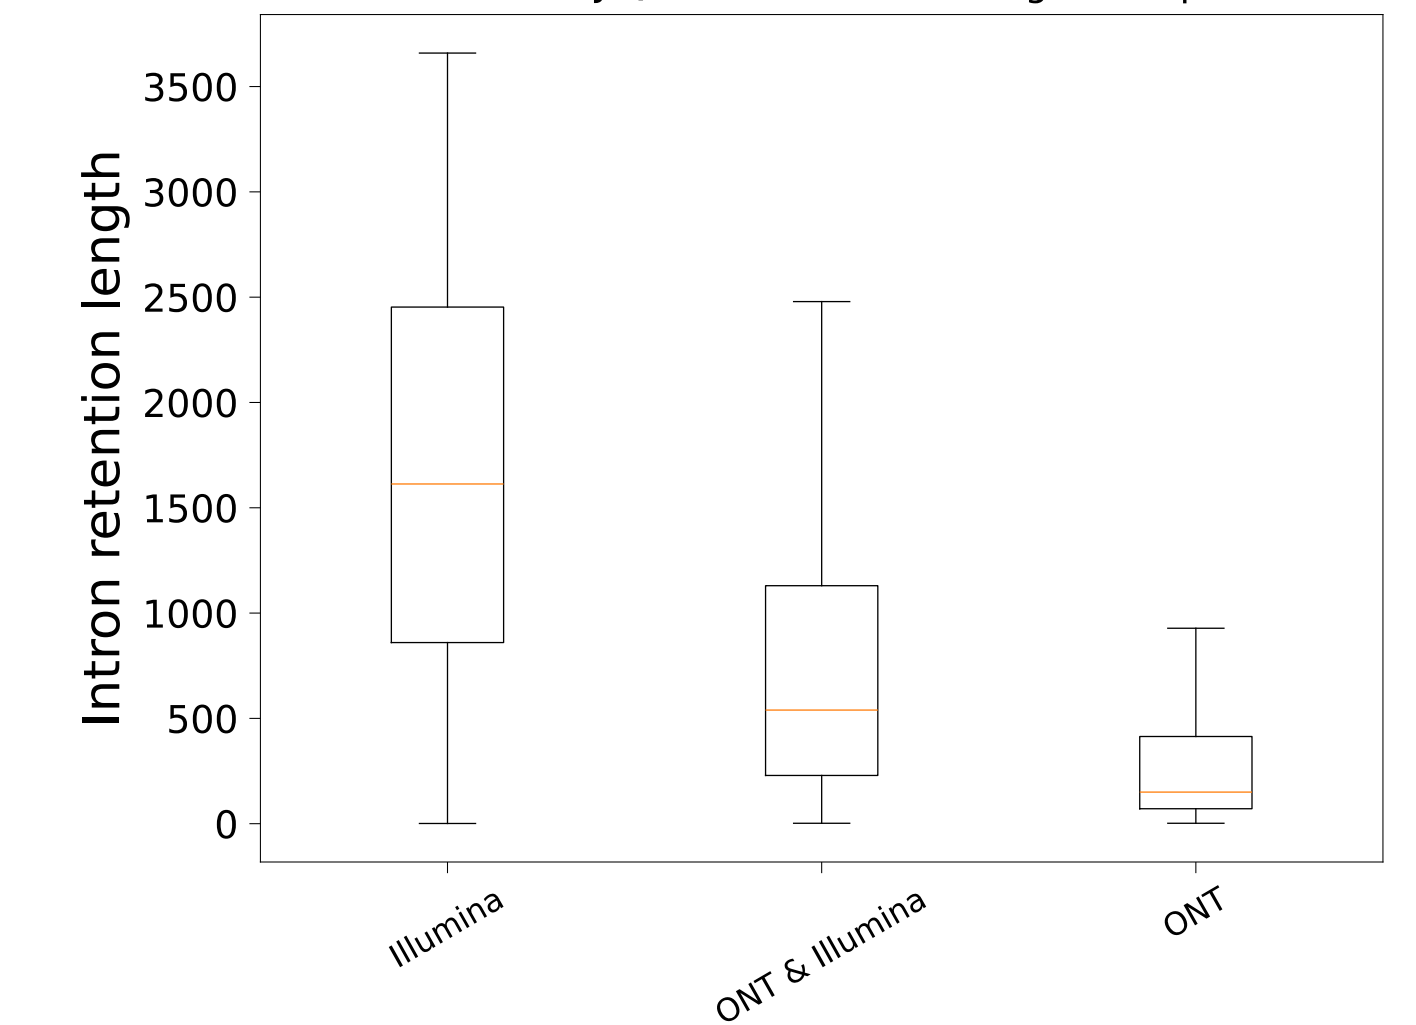

GTEx Liver FLAIR and MAJIQ intron retention length comparison

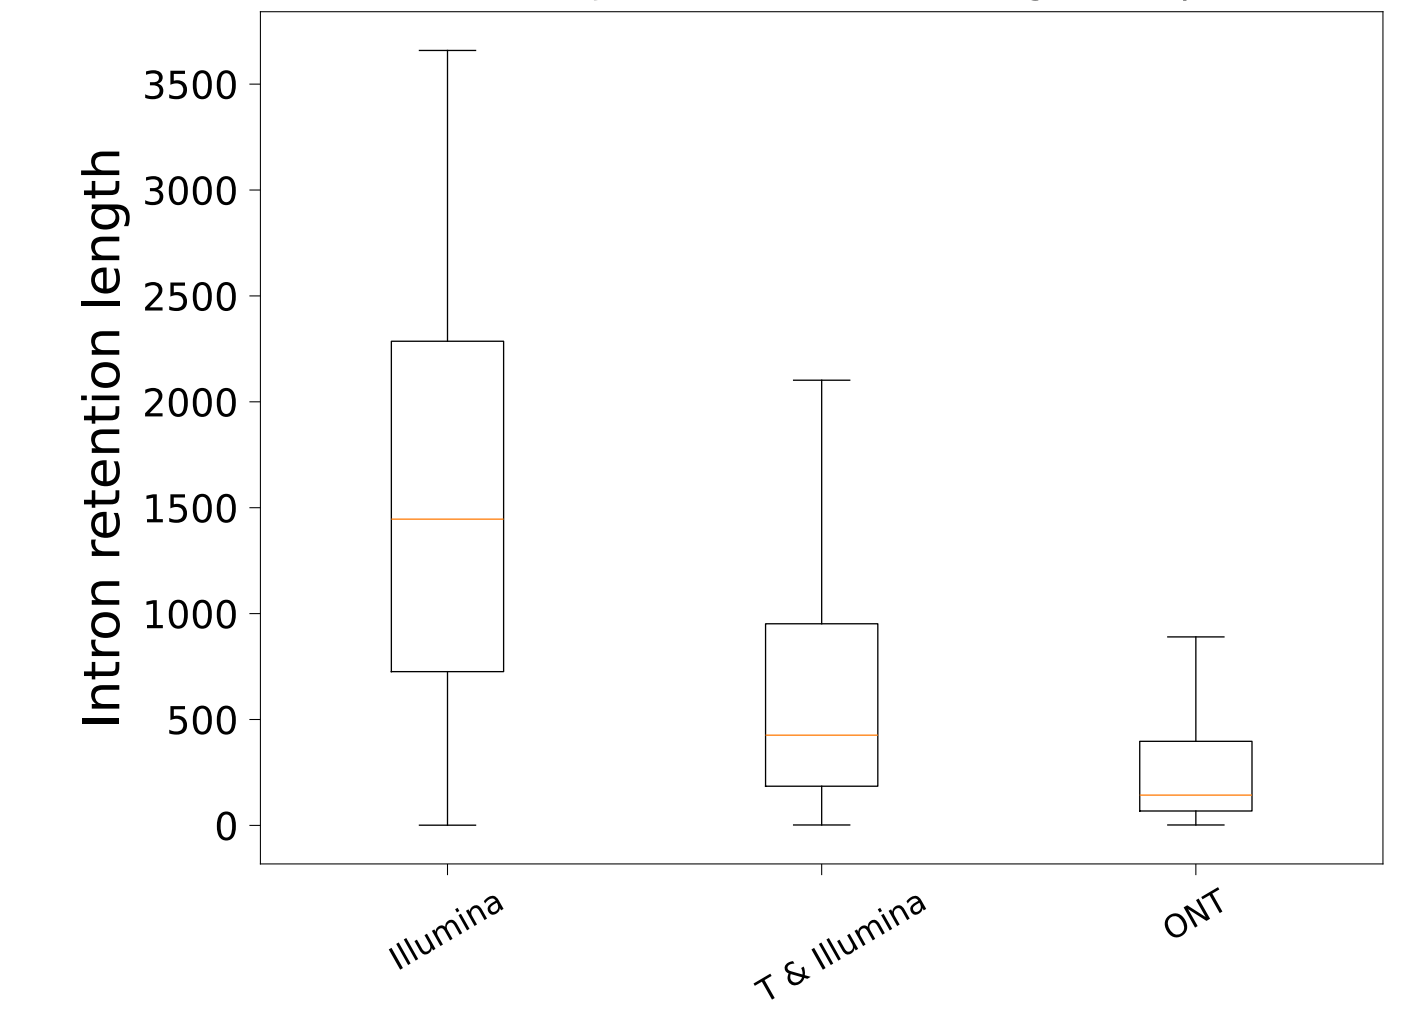

Supplement: Supplemental_code.zip [file Supplemental_Fig_S11.pdf › Supplemental_code/figures/Supplemental_Fig_S11/Supplemental_Fig_S11.pdf]
