# Supplementary material for: Contrasting and combining transcriptome complexity captured by short and long RNA sequencing reads
Source: HighWire-hosted journal article supplement (doi:10.1101/gr.278659.123), 2024-09-25
Supplement: Supplemental_code.zip [file Supplemental_Table_S1.xlsx]

## Sheet: Sheet1
	Sample	WTC11
	Method	cDNA
	Tech	Illumina	PacBio	ONT
	# of replicates	3	3	3
	# of reads	137,043,475 (143,171,620)	5,521,442 (7,424,923)	20,888,972 (51,194,535)
	Median read length	89	2209	610
