# Supplementary material for: Contrasting and combining transcriptome complexity captured by short and long RNA sequencing reads
Source: HighWire-hosted journal article supplement (doi:10.1101/gr.278659.123), 2024-09-25
Supplement: Supplemental_code.zip [file Supplemental_Table_S2.xlsx]

## Sheet: Sheet1
	Sample	ALL1807
	Method	cDNA
	Tech	Illumina	ONT
	# of replicates	1	1
	# or reads	112819050	19,473,944 (57,523,865)
	Median read length	150	869
