# Supplementary material for: Contrasting and combining transcriptome complexity captured by short and long RNA sequencing reads
Source: HighWire-hosted journal article supplement (doi:10.1101/gr.278659.123), 2024-09-25
Supplement: Supplemental_code.zip [file Supplemental_Table_S3.xlsx]

## Sheet: Sheet1
Tissue	Tech	Sample	# of reads	Median read length
Heart - Atrial Appendage	ONT	GTEX-1GN1W-0226-SM-7AGLJ	5667159	630
	Illumina	GTEX-1GN1W-0226-SM-7P8QY	46,977,630 (167,645,011)	76
	ONT	GTEX-1HBPH-0226-SM-7LLUW	8228317	718
	Illumina	GTEX-1HBPH-0226-SM-9WYSM	77,735,083 (106,764,362)	76
	ONT	GTEX-1IDJD-0226-SM-AML89	7,797,416 (7,955,912)	720
	Illumina	GTEX-1IDJD-0226-SM-CKZOA	73870263	76
Brain - Frontal Cortex (BA9)	ONT	GTEX-13X6J-0011-R10b-SM-5CEKT	3579584	488
	Illumina	GTEX-13X6J-0011-R10b-SM-5PNWA	22,984,697 (92,919,521)	76
	ONT	GTEX-14BIL-0011-R10a-SM-5EQV4	8937693	497
	Illumina	GTEX-14BIL-0011-R10a-SM-5SI75	58,447,808 (92,585,357)	76
	ONT	GTEX-QDT8-0011-R10A-SM-2FKJB	7994072	791
	Illumina	GTEX-QDT8-0011-R10A-SM-32PKG	83,201,459 (137,548,341)	76
Liver	ONT	GTEX-R53T-0326-SM-2K8S4	8341720	740
	Illumina	GTEX-R53T-0326-SM-48FEC	74,162,897 (81,222,010)	76
	ONT	GTEX-Y5LM-0426-SM-3YX99	5573832	793
	Illumina	GTEX-Y5LM-0426-SM-4VBRO	58,158,536 (126,220,133)	76
	ONT	GTEX-ZT9X-0326-SM-4U9QG	61,61,722	746
	Illumina	GTEX-ZT9X-0326-SM-51MTE	60,482,165 (89,506,980)	76
