# Supplementary material for: Contrasting and combining transcriptome complexity captured by short and long RNA sequencing reads
Source: HighWire-hosted journal article supplement (doi:10.1101/gr.278659.123), 2024-09-25
Supplement: Supplemental_code.zip [file Supplemental_Table_S4.xlsx]

## Sheet: Sheet1
	Software	Version	Command options	PacBio	ONT
	minmap2	2.24	ax t 30	splice:hq	splice
	FLAIR	1.7	t 30
	IsoQuant	3.2.0	complete_genedb t 30	data_type pacbio_ccs	data_type nanopore
	Bmabu	2.0.0	ncore=30
	ESPRESSO	1.3.2	T 30
