# Supplementary figures and images for: Contrasting and combining transcriptome complexity captured by short and long RNA sequencing reads (part 1 of 2)
Source: HighWire-hosted journal article supplement (doi:10.1101/gr.278659.123), 2024-09-25

# MAJIQ and Bambu ONT comparison

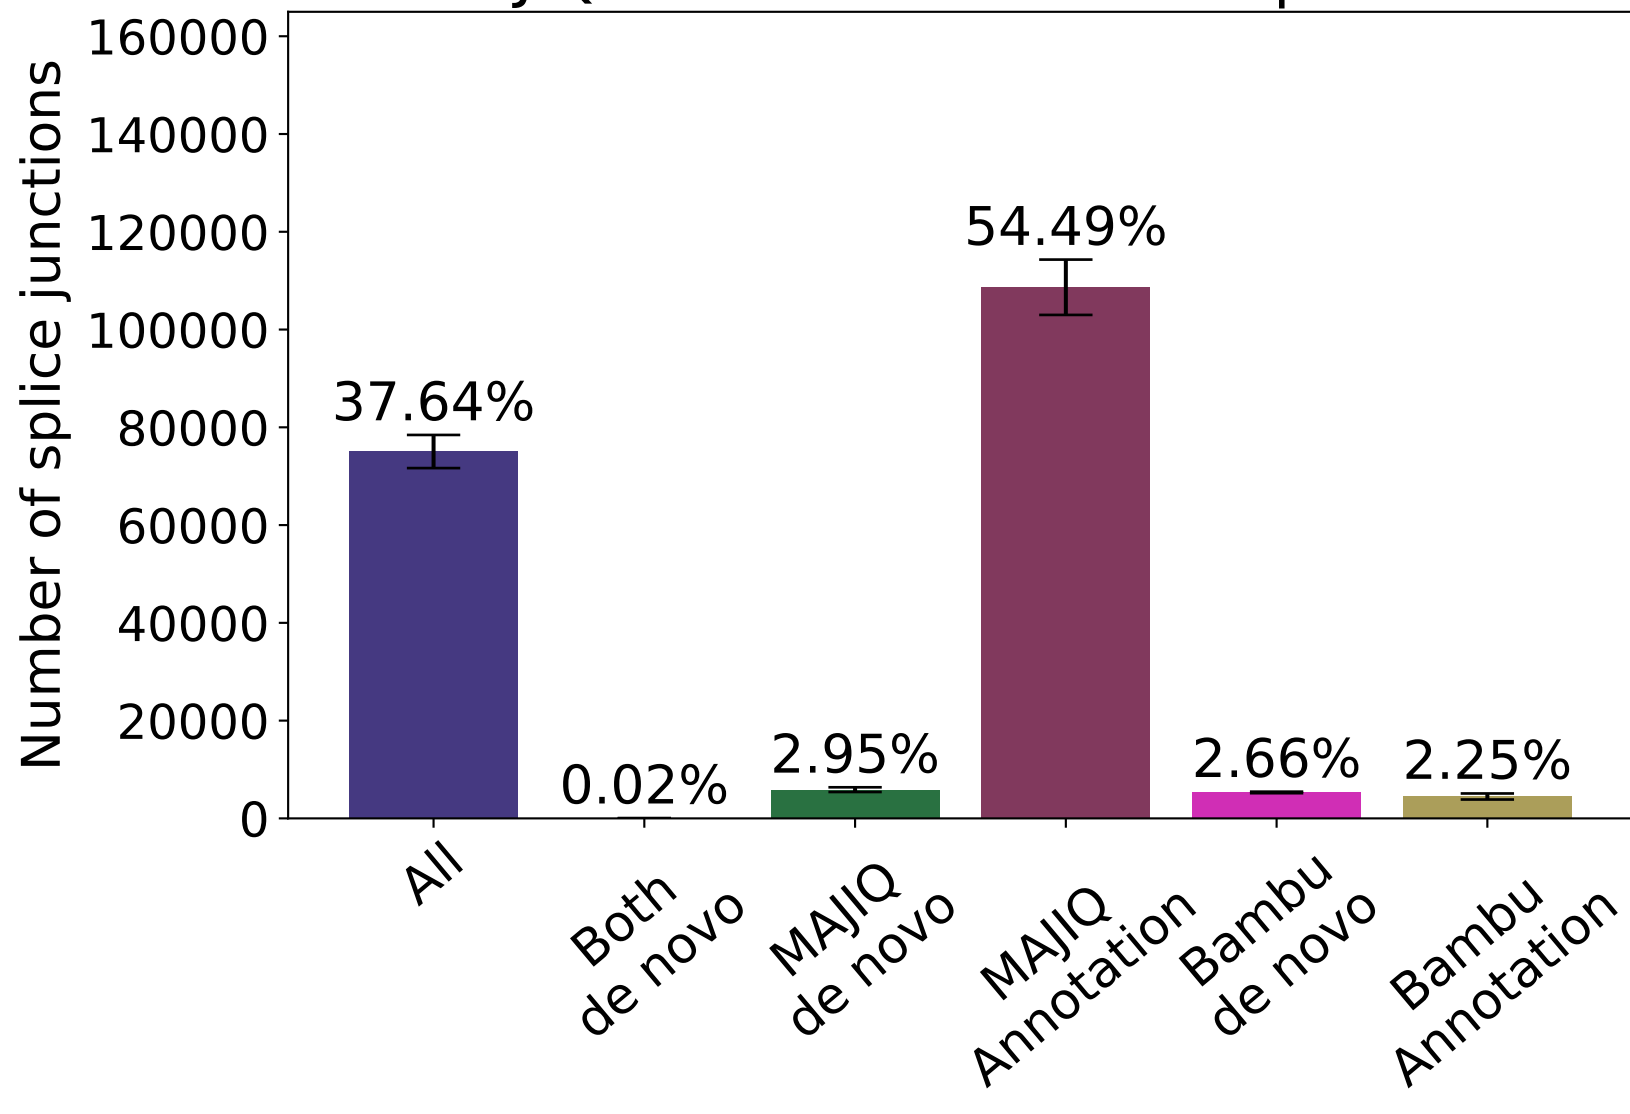

Supplement: Supplemental_code.zip [file Fig_2B_bambu_ont_post.pdf › Supplemental_code/figures/Fig_2/Fig_2B_bambu_ont_post.pdf]

# MAJIQ and Bambu PacBio comparison

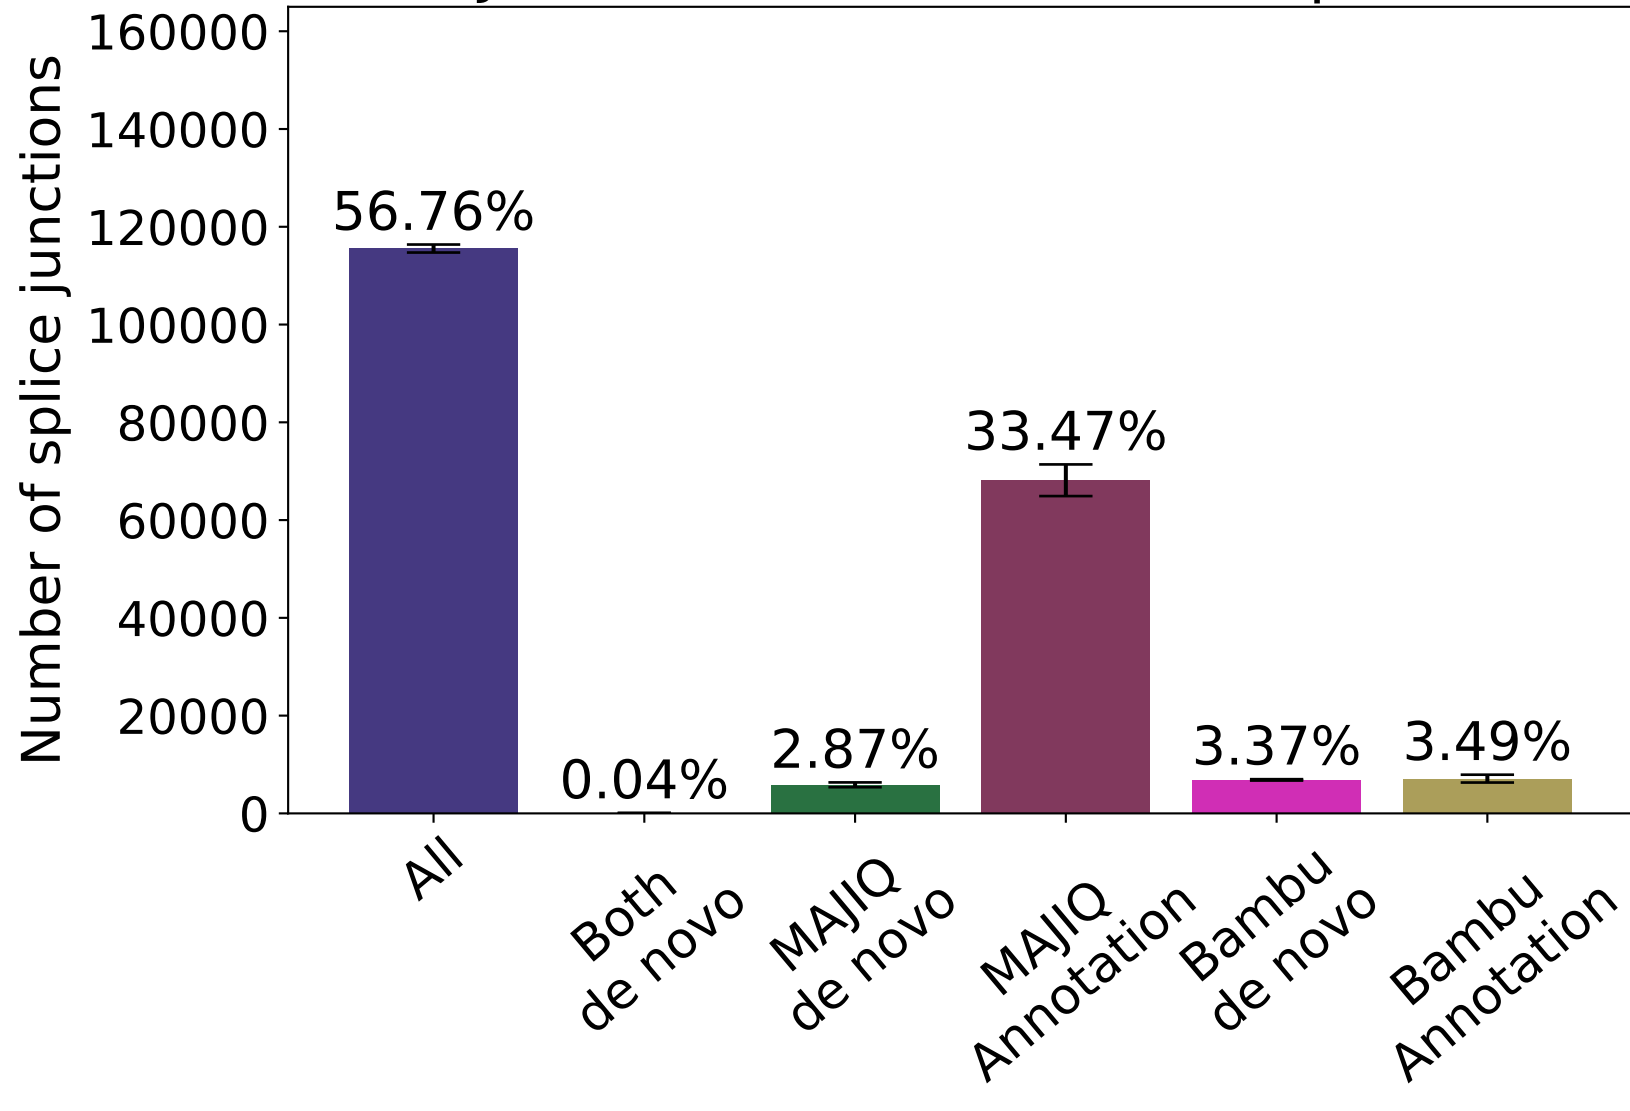

Supplement: Supplemental_code.zip [file Fig_2B_bambu_pcb_post.pdf › Supplemental_code/figures/Fig_2/Fig_2B_bambu_pcb_post.pdf]

# MAJIQ and ESPRESSO ONT comparison

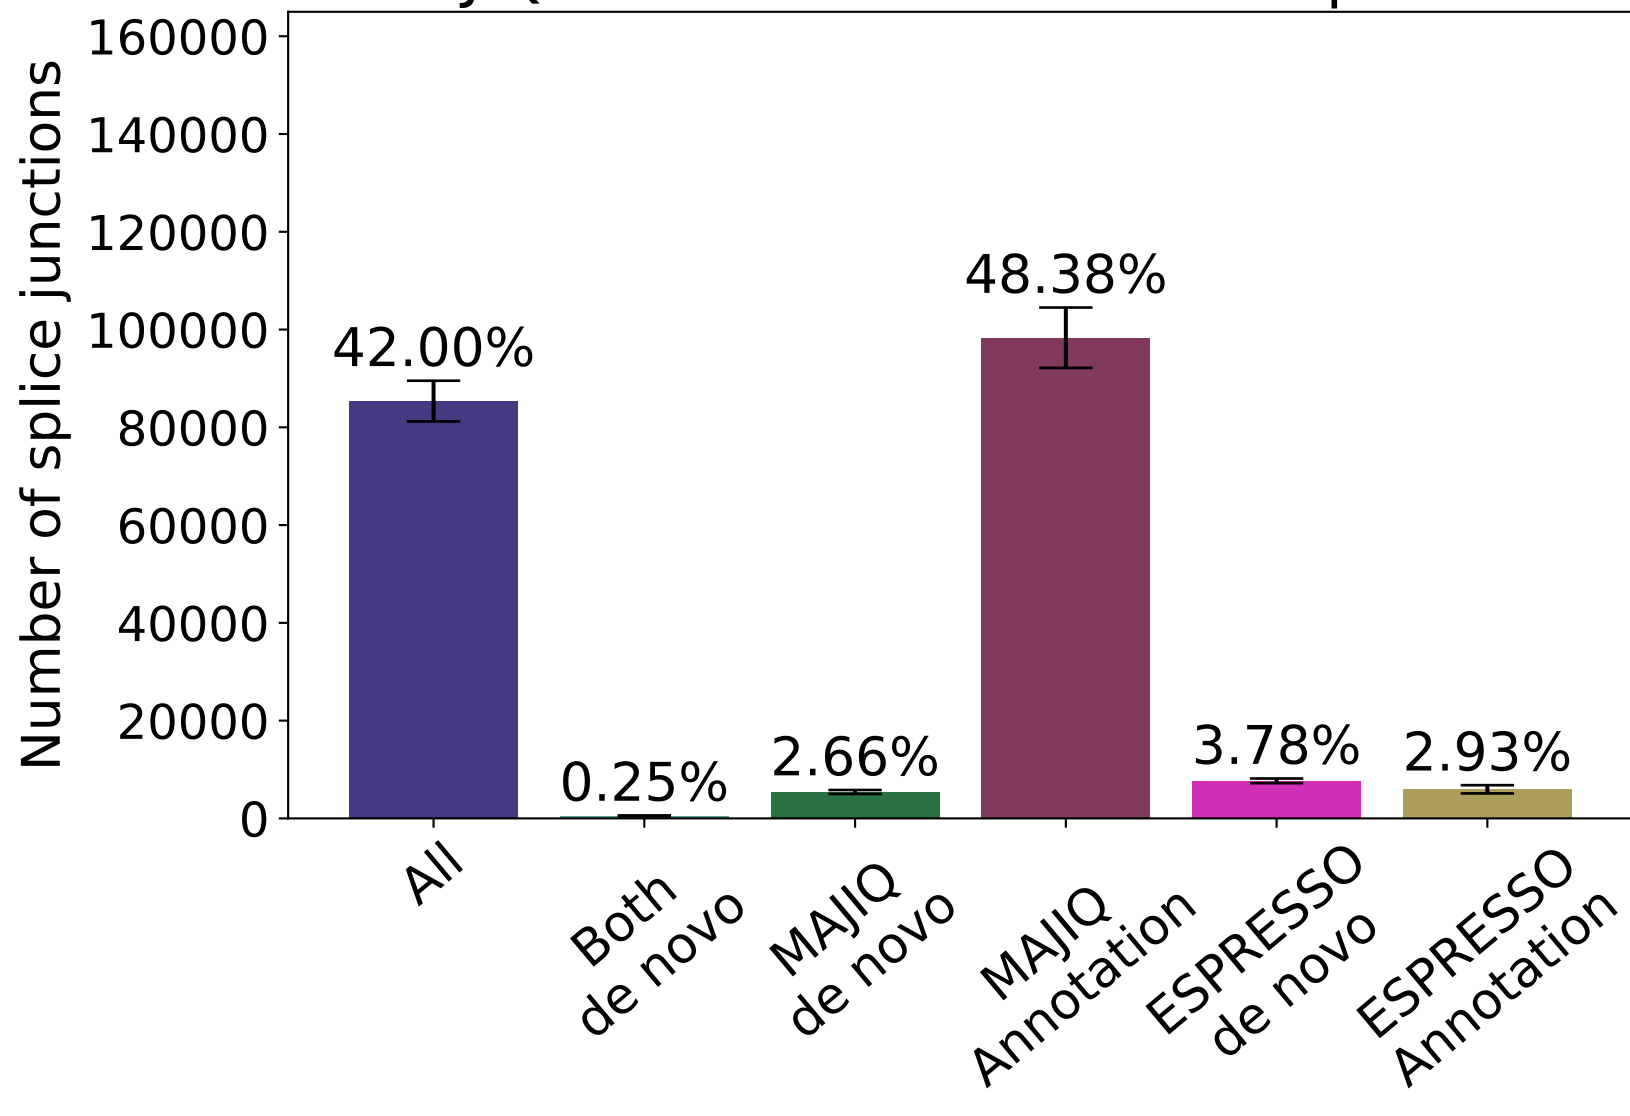

Supplement: Supplemental_code.zip [file Fig_2B_esp_ont_post.pdf › Supplemental_code/figures/Fig_2/Fig_2B_esp_ont_post.pdf]

# MAJIQ and ESPRESSO PacBio comparison

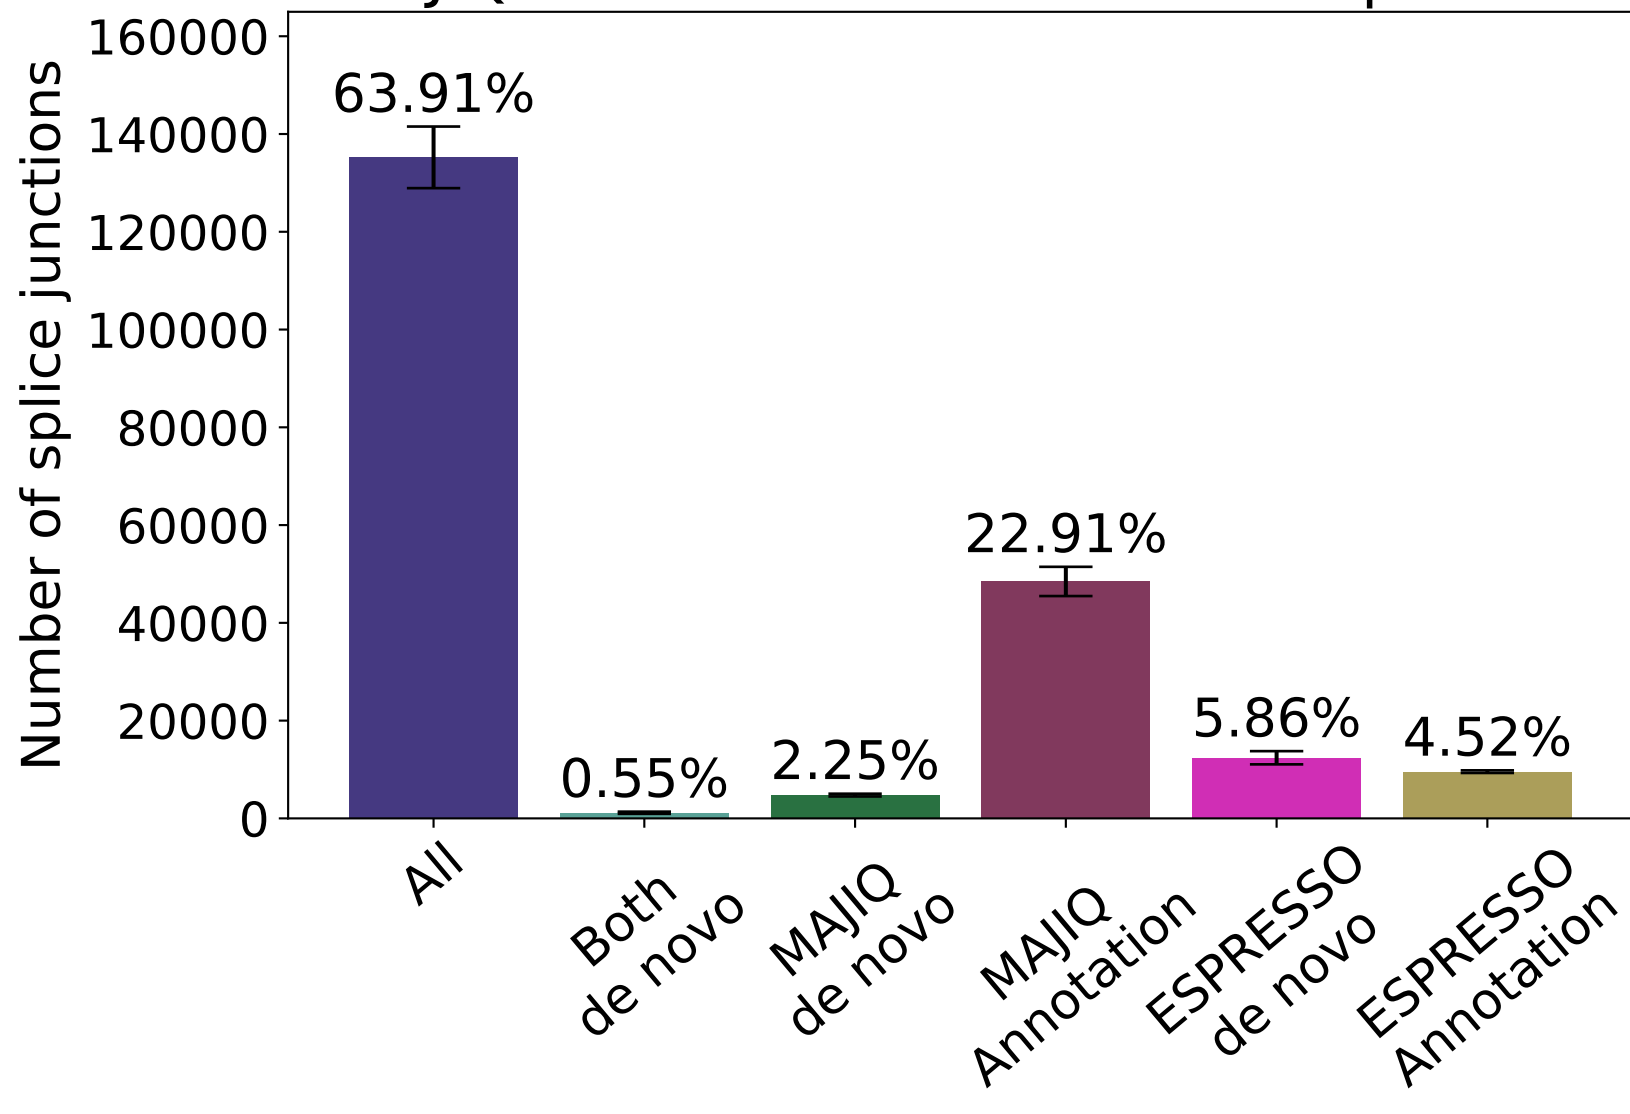

Supplement: Supplemental_code.zip [file Fig_2B_esp_pcb_post.pdf › Supplemental_code/figures/Fig_2/Fig_2B_esp_pcb_post.pdf]

# MAJIQ and FLAIR OMT comparison

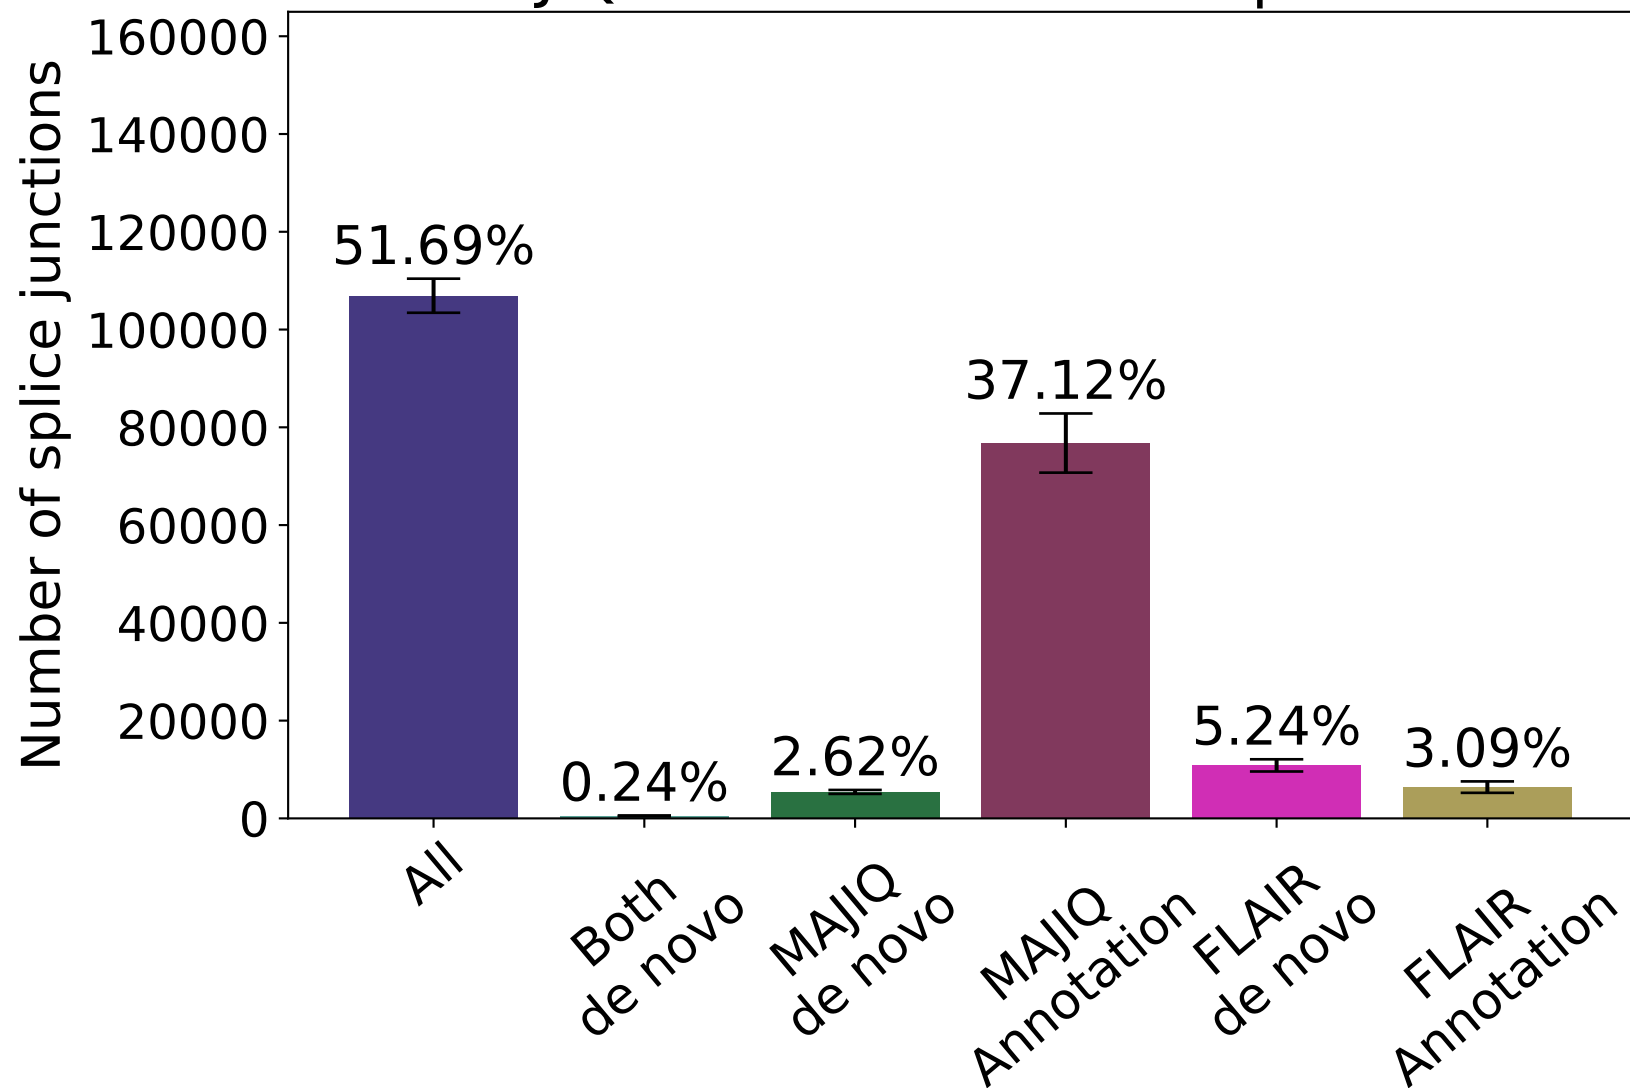

Supplement: Supplemental_code.zip [file Fig_2B_flair_ont_post.pdf › Supplemental_code/figures/Fig_2/Fig_2B_flair_ont_post.pdf]

# MAJIQ and FLAIR PacBio comparison

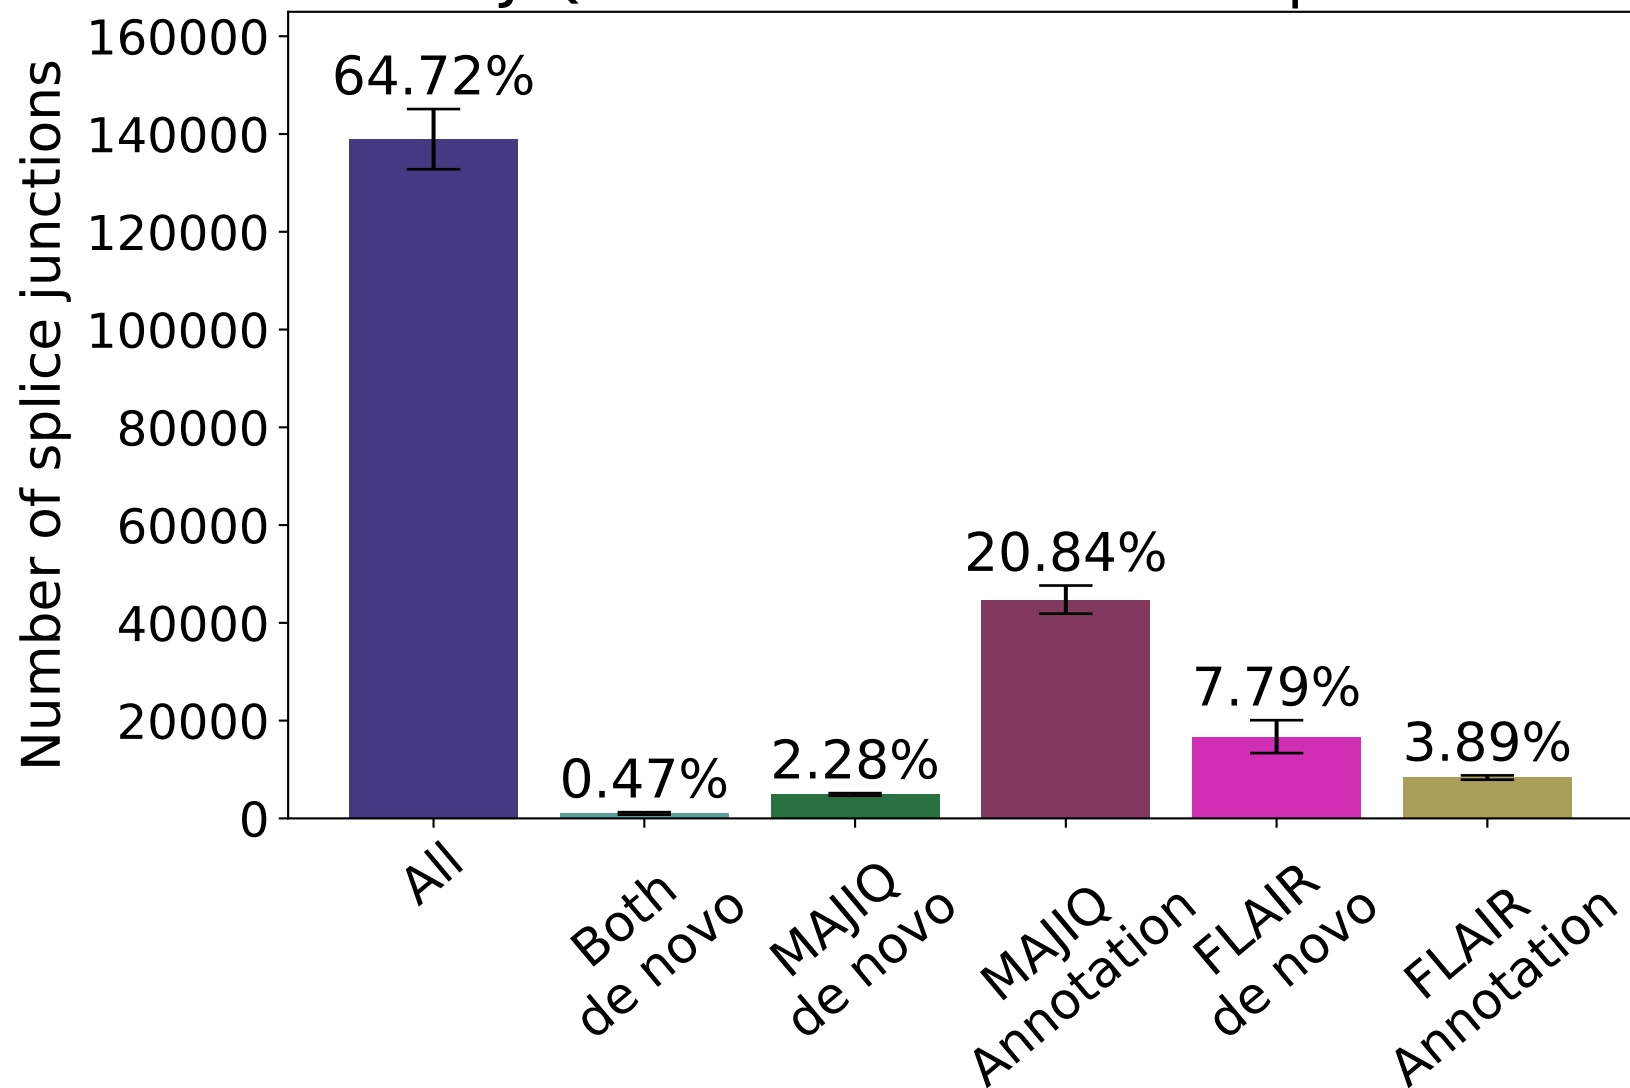

Supplement: Supplemental_code.zip [file Fig_2B_flair_pcb_post.pdf › Supplemental_code/figures/Fig_2/Fig_2B_flair_pcb_post.pdf]

# MAJIQ and IsoQuant OMT comparison

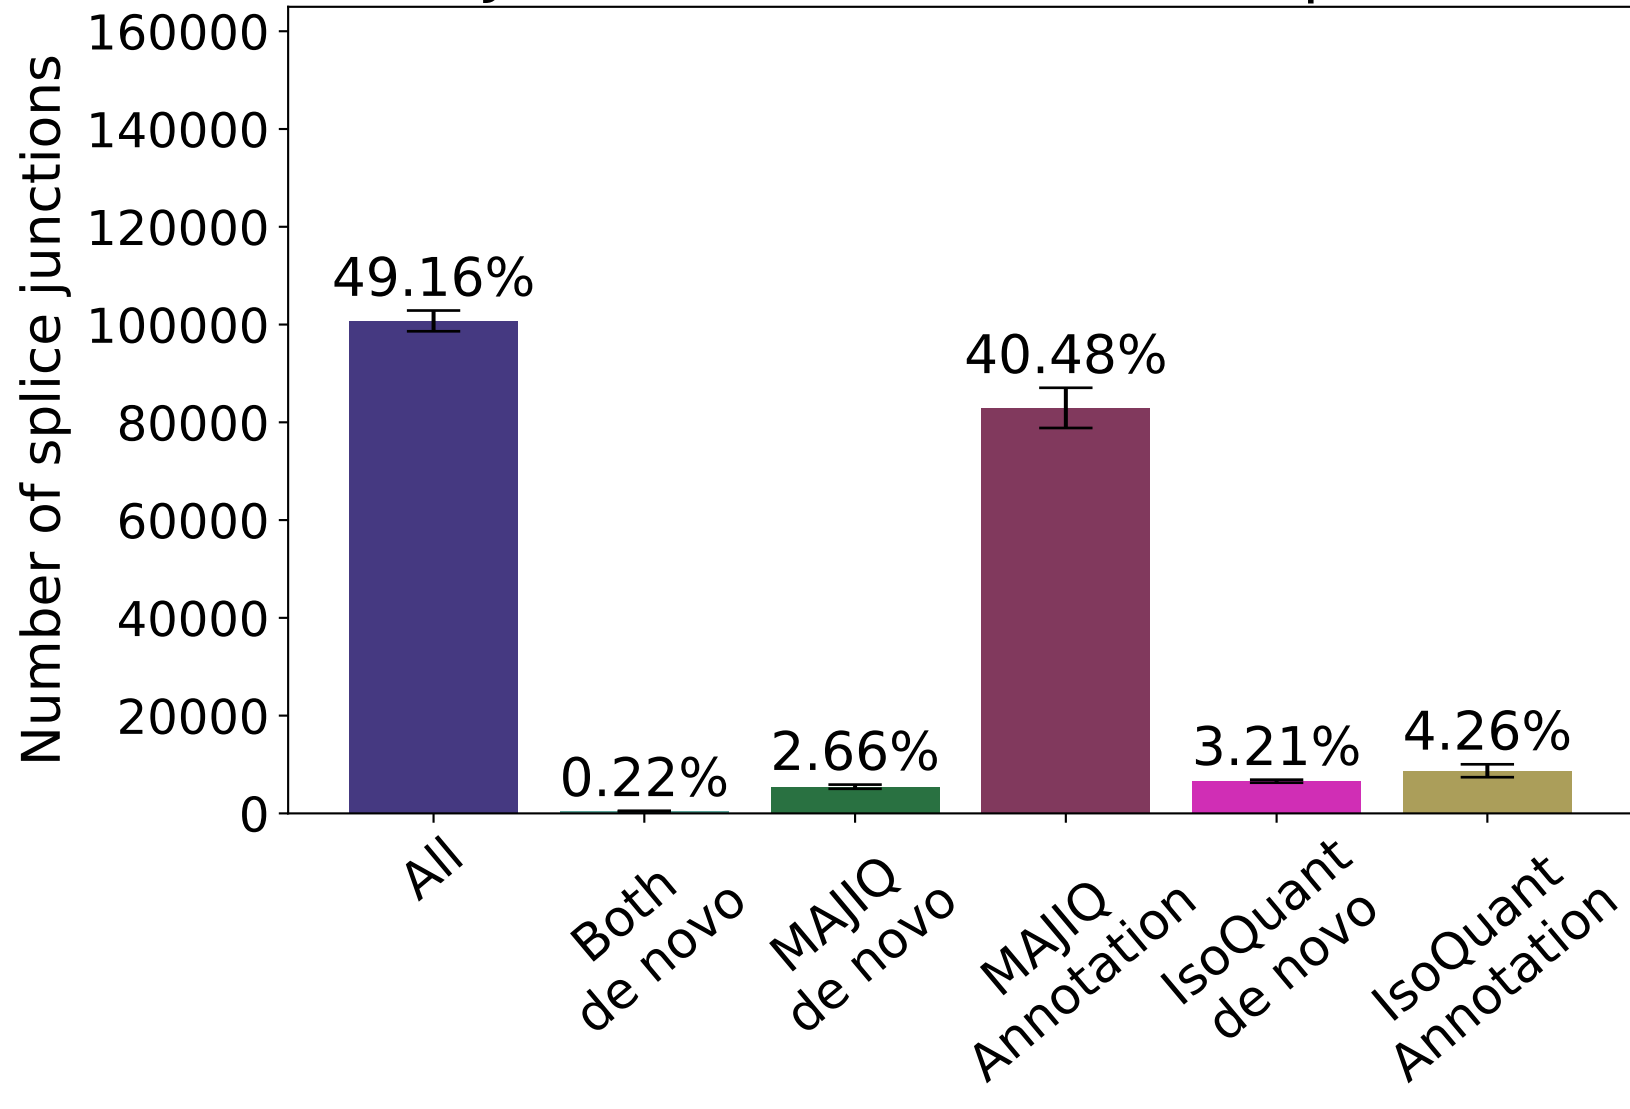

Supplement: Supplemental_code.zip [file Fig_2B_isq_ont_post.pdf › Supplemental_code/figures/Fig_2/Fig_2B_isq_ont_post.pdf]

# MAJIQ and IsoQuant PacBio comparison

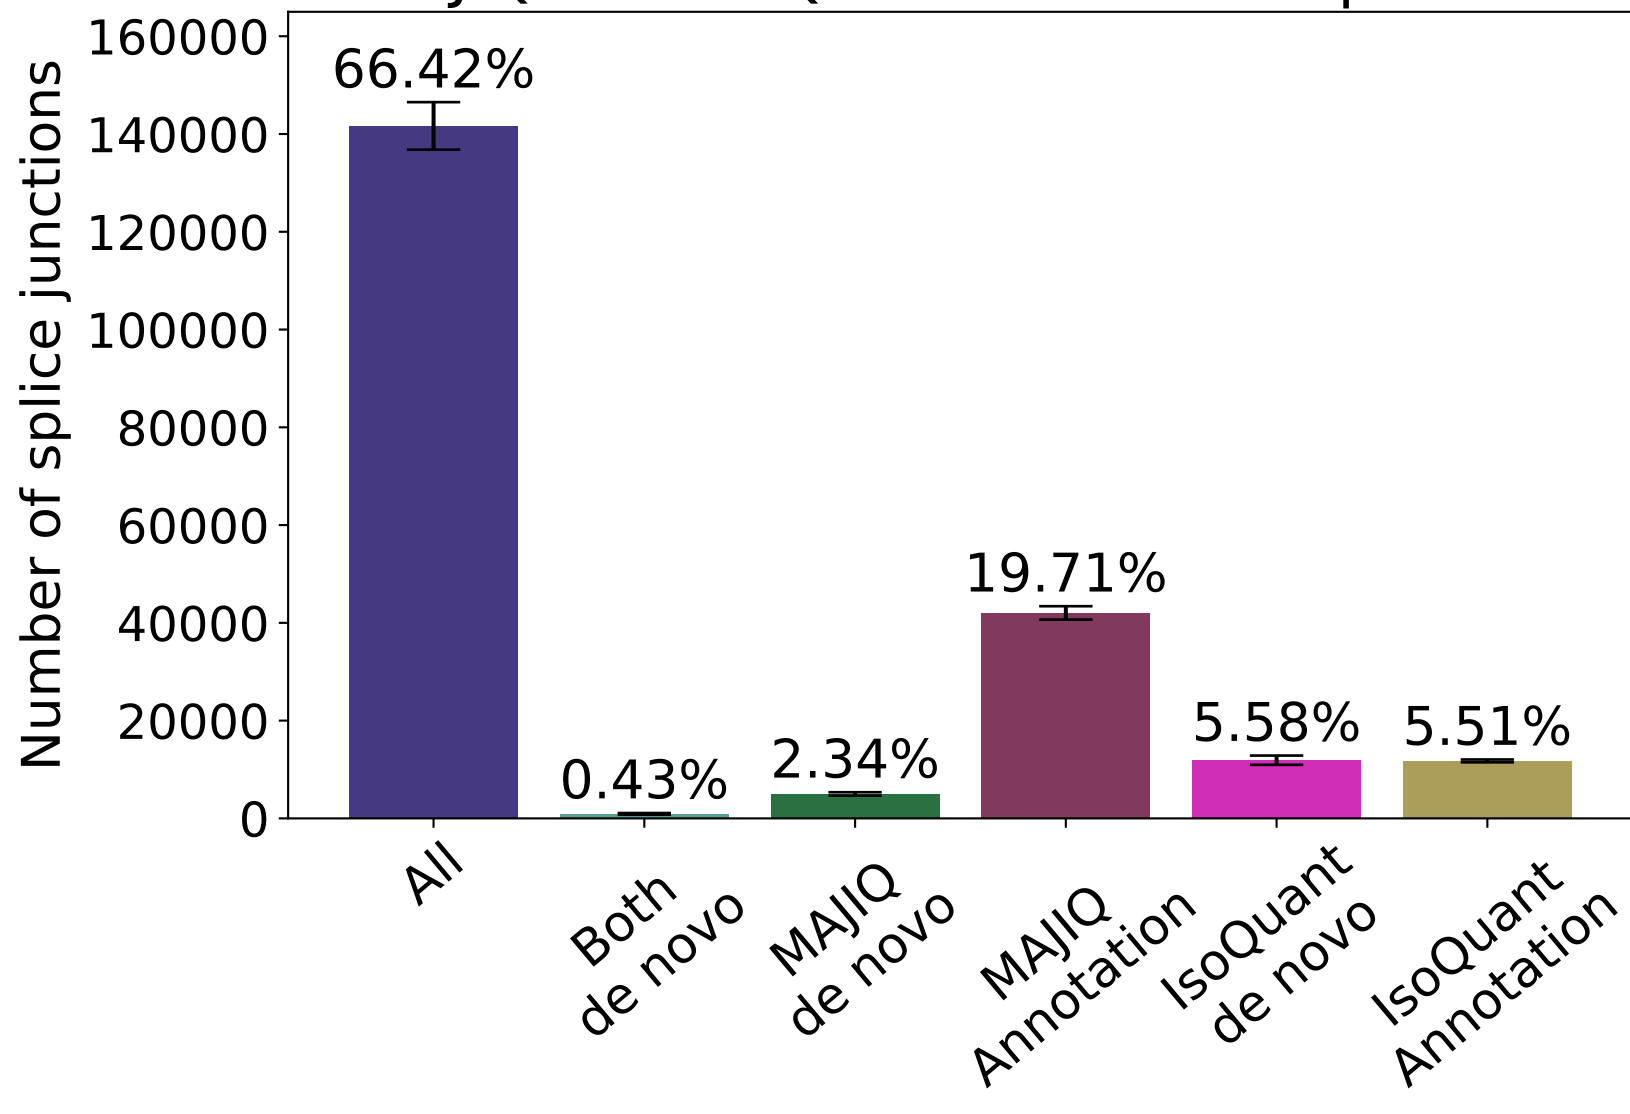

Supplement: Supplemental_code.zip [file Fig_2B_isq_pcb_post.pdf › Supplemental_code/figures/Fig_2/Fig_2B_isq_pcb_post.pdf]

# MAJIQ and IsoQuant PSI ( $\Psi$ )

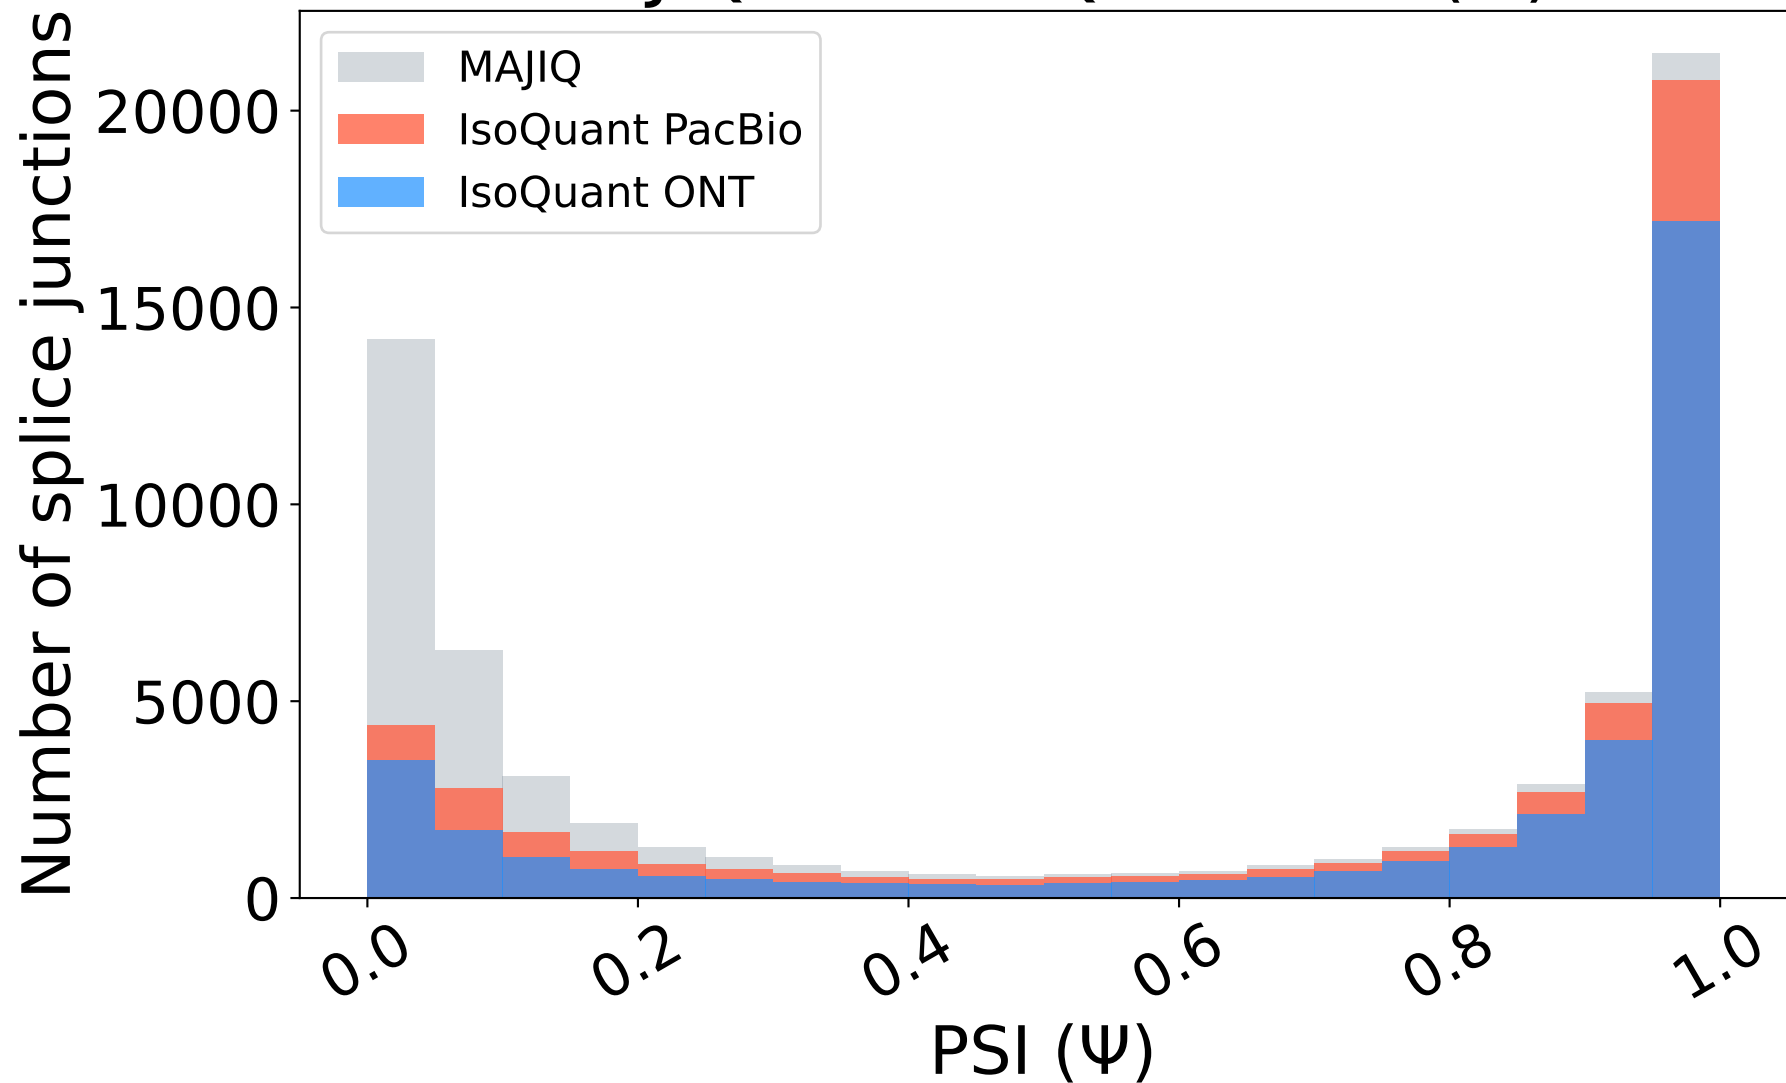

Supplement: Supplemental_code.zip [file Fig_2C_isq_psi1.pdf › Supplemental_code/figures/Fig_2/Fig_2C_isq_psi1.pdf]

# MAJIQ and IsoQuant PSI ( $\Psi$ )

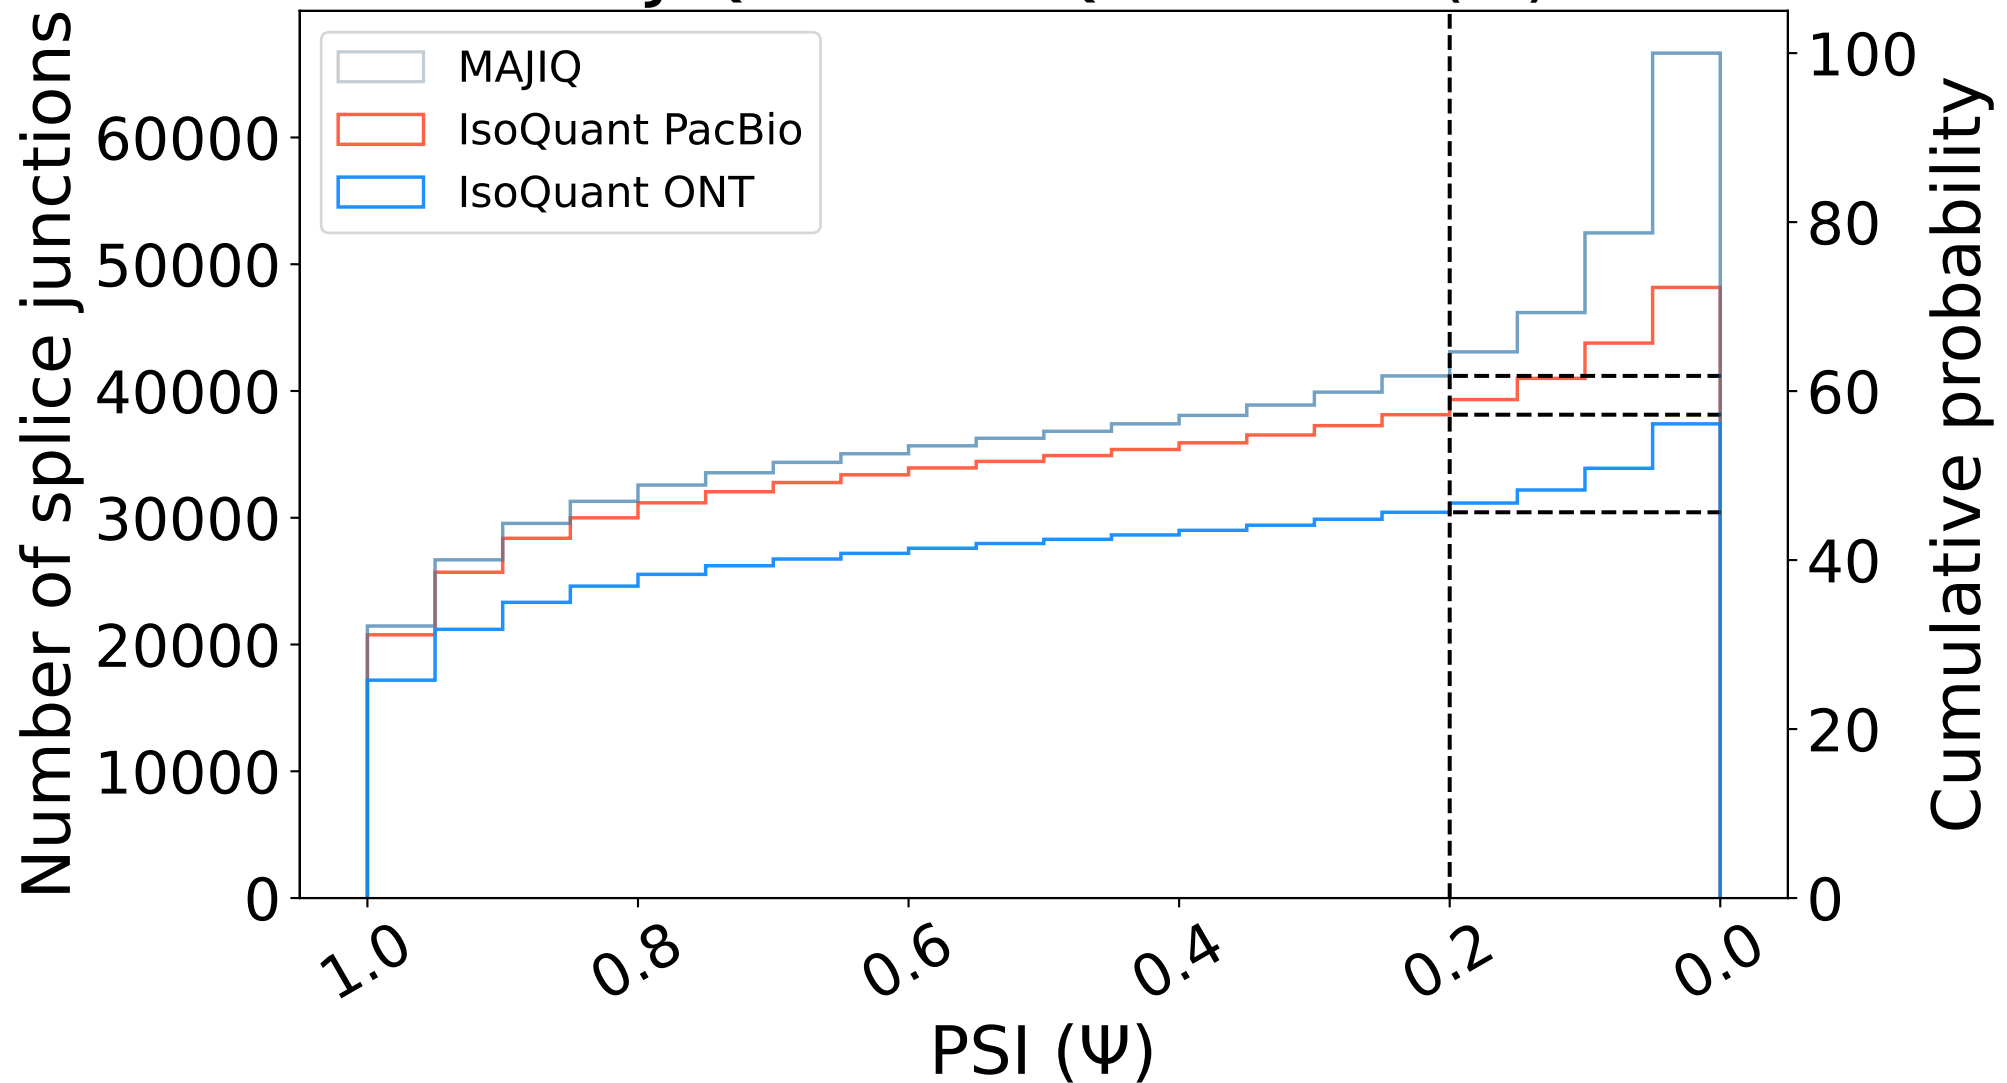

Supplement: Supplemental_code.zip [file Fig_2C_isq_psi2.pdf › Supplemental_code/figures/Fig_2/Fig_2C_isq_psi2.pdf]

IsoQuant PacBio

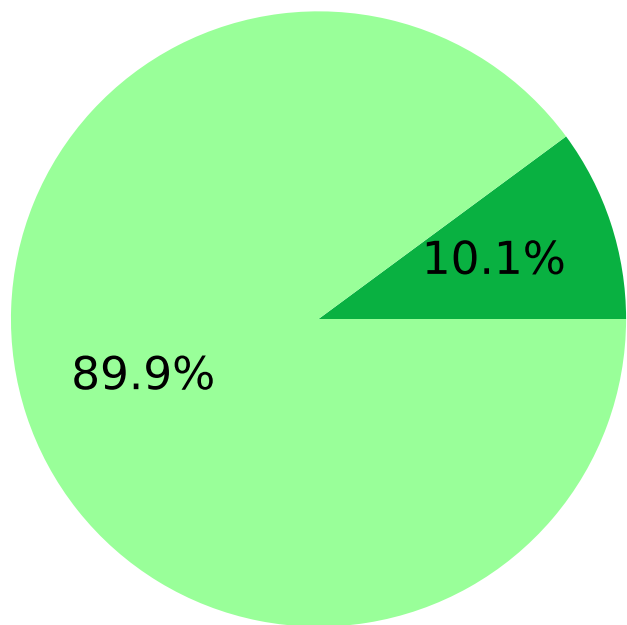

IsoQuant ONT

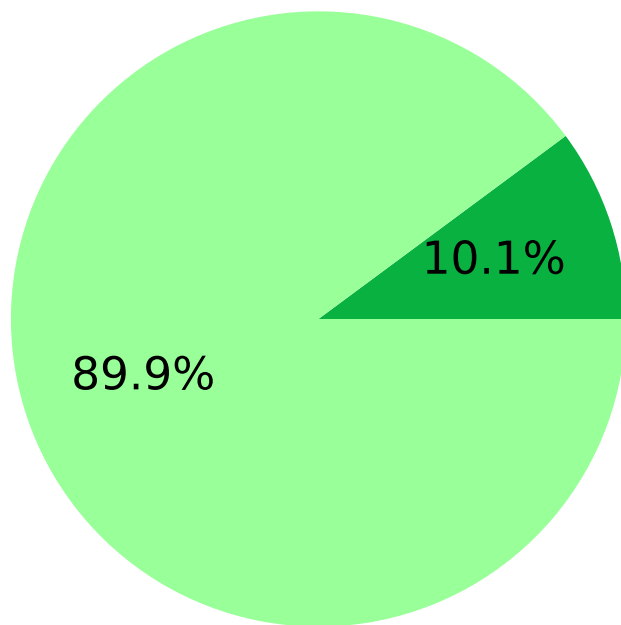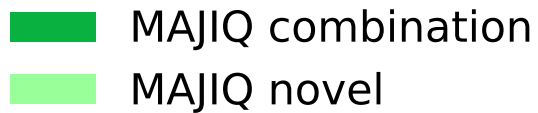

Supplement: Supplemental_code.zip [file Fig_3A_pie_isq_post.pdf › Supplemental_code/figures/Fig_3/Fig_3A_pie_isq_post.pdf]

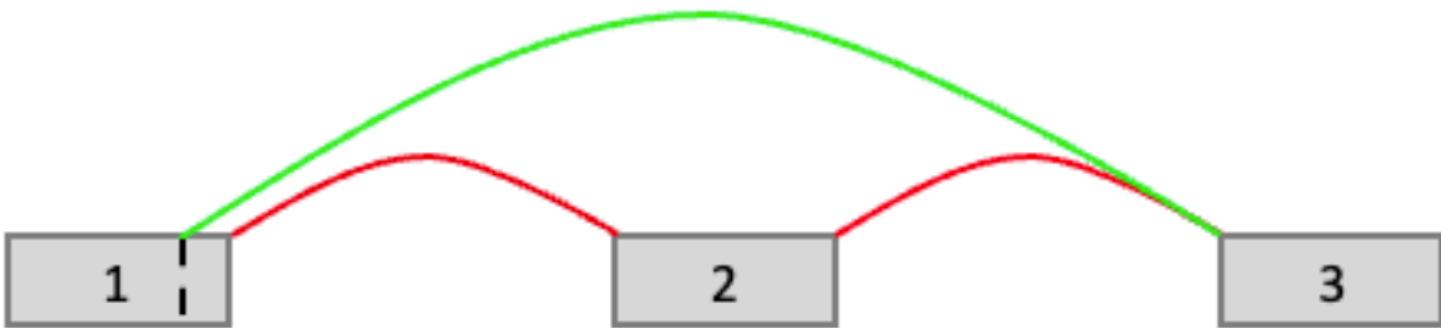

Novel junction

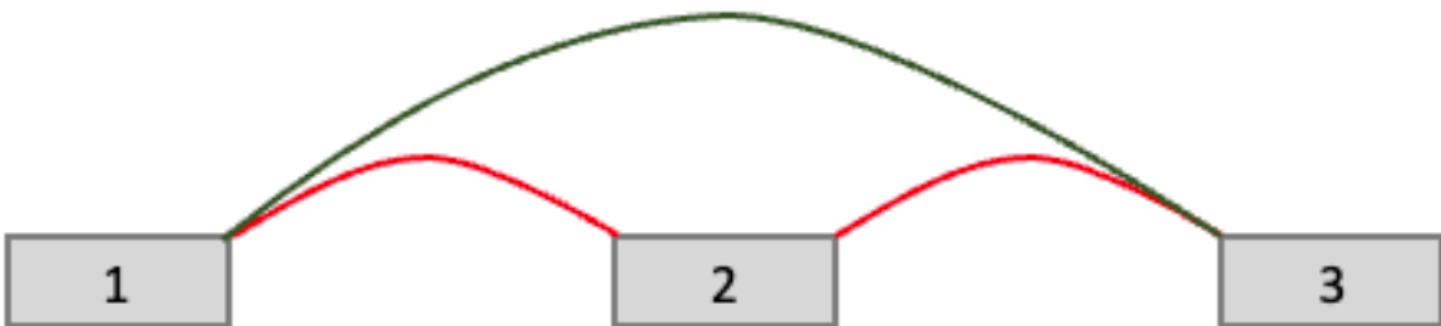

Combination junction

Supplement: Supplemental_code.zip [file Fig_3A_sr_denovo.pdf › Supplemental_code/figures/Fig_3/Fig_3A_sr_denovo.pdf]

# IsoQuant ONT de novo junction

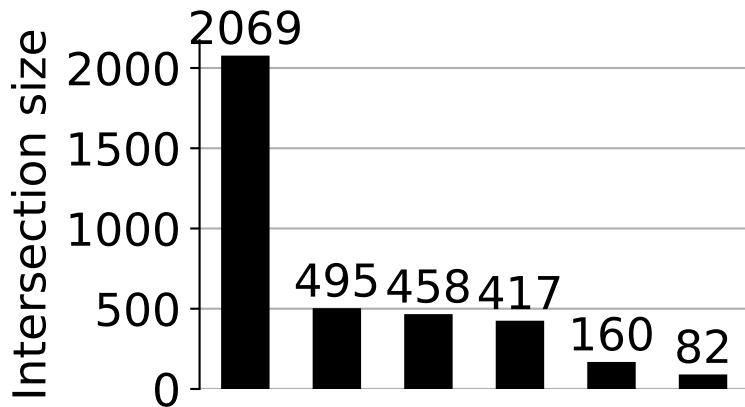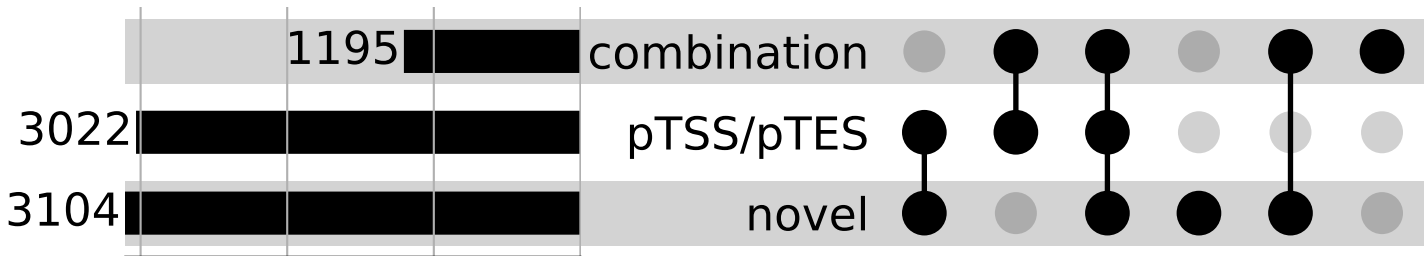

Supplement: Supplemental_code.zip [file Fig_3C_isq_ont_denov.pdf › Supplemental_code/figures/Fig_3/Fig_3C_isq_ont_denov.pdf]

# IsoQuant PacBio de novo junction

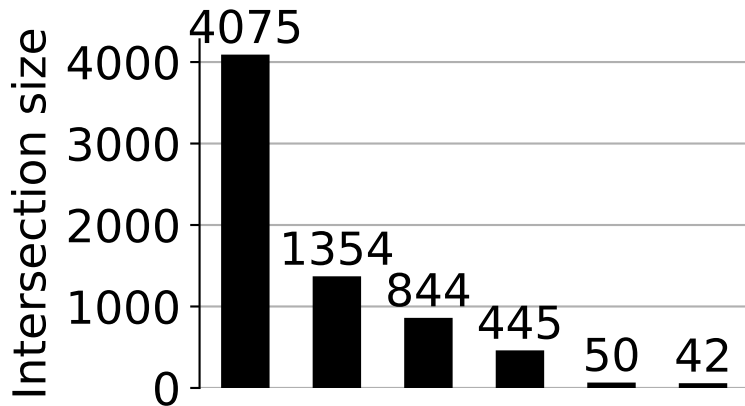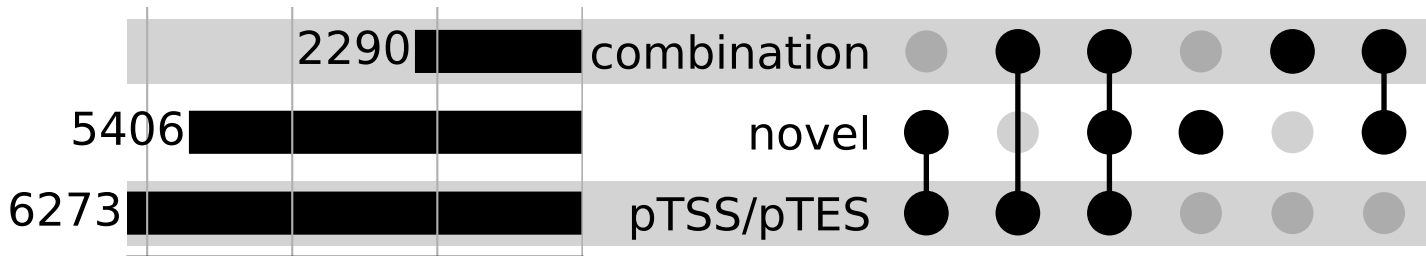

Supplement: Supplemental_code.zip [file Fig_3C_isq_pcb_denovo.pdf › Supplemental_code/figures/Fig_3/Fig_3C_isq_pcb_denovo.pdf]

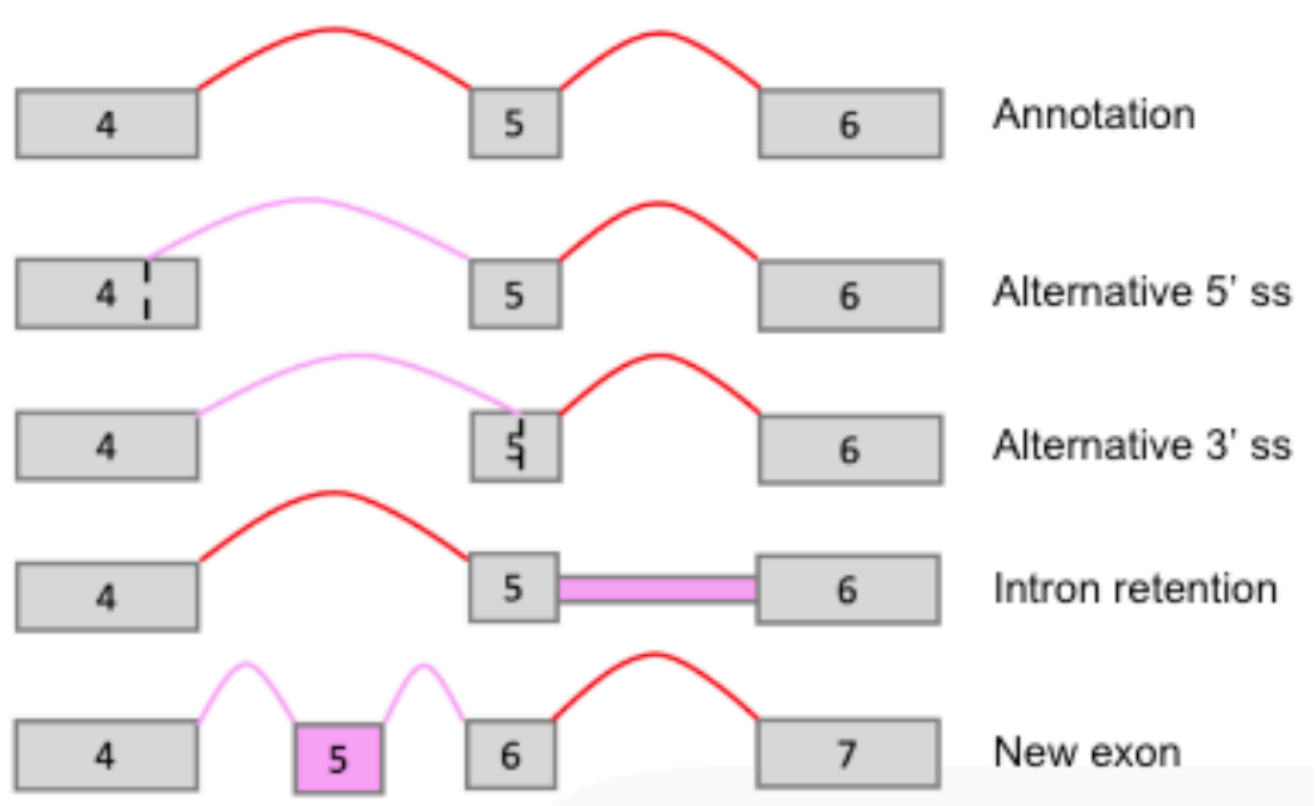

Supplement: Supplemental_code.zip [file Fig_3D_lr_novel.pdf › Supplemental_code/figures/Fig_3/Fig_3D_lr_novel.pdf]

# IsoQuant ONT novel splice site

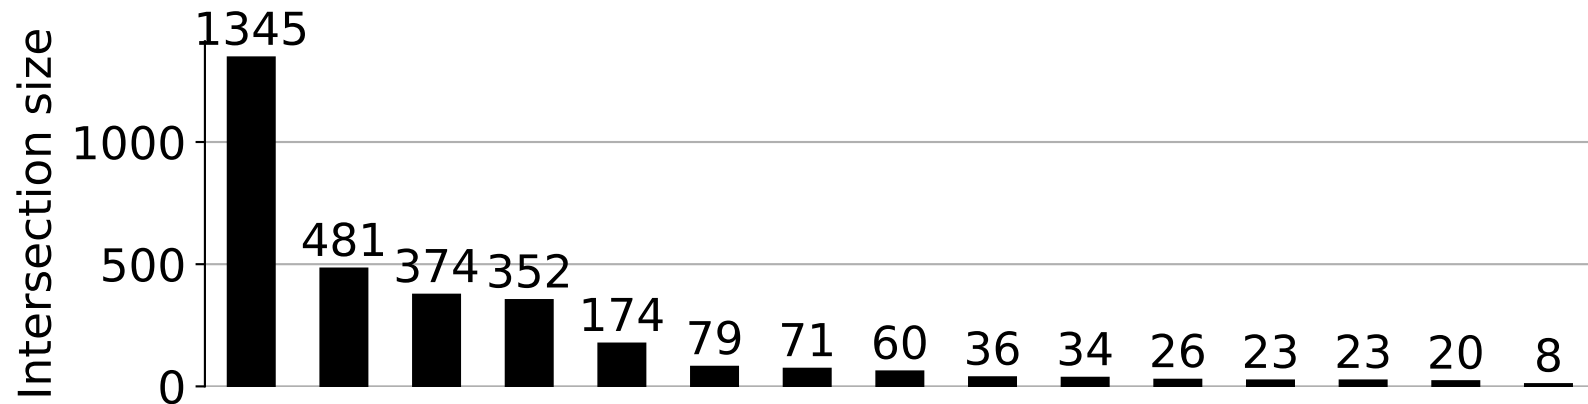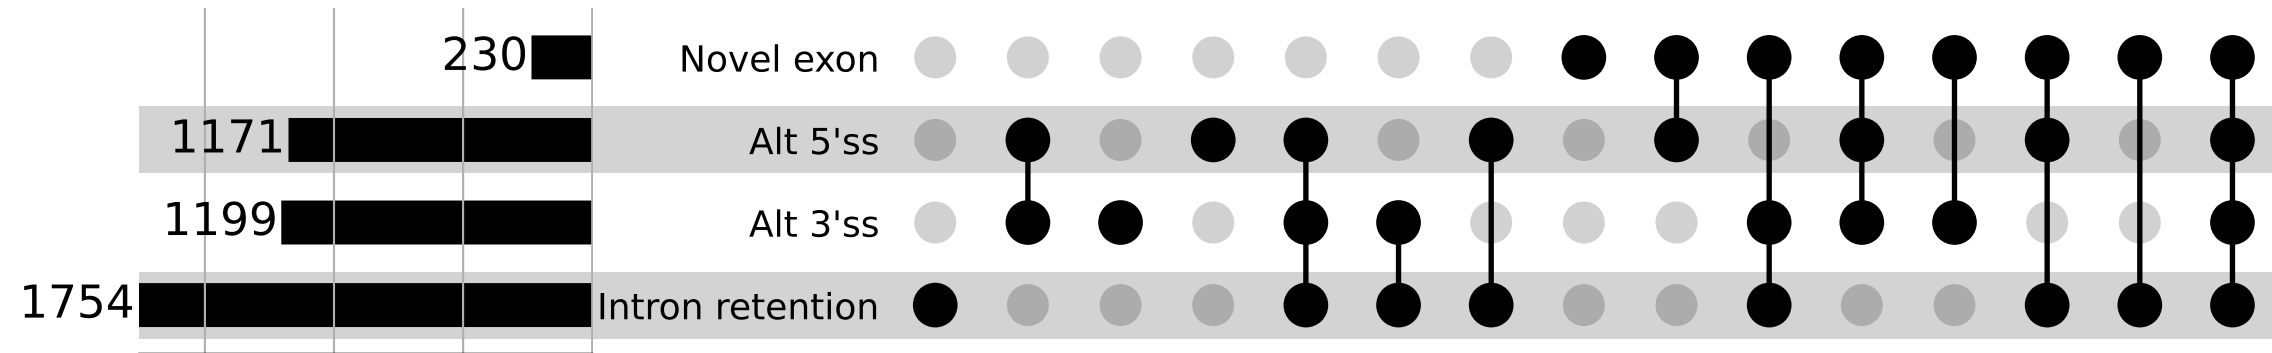

Supplement: Supplemental_code.zip [file Fig_3E_isq_ont_novel.pdf › Supplemental_code/figures/Fig_3/Fig_3E_isq_ont_novel.pdf]

# IsoQuant PacBio novel splice site

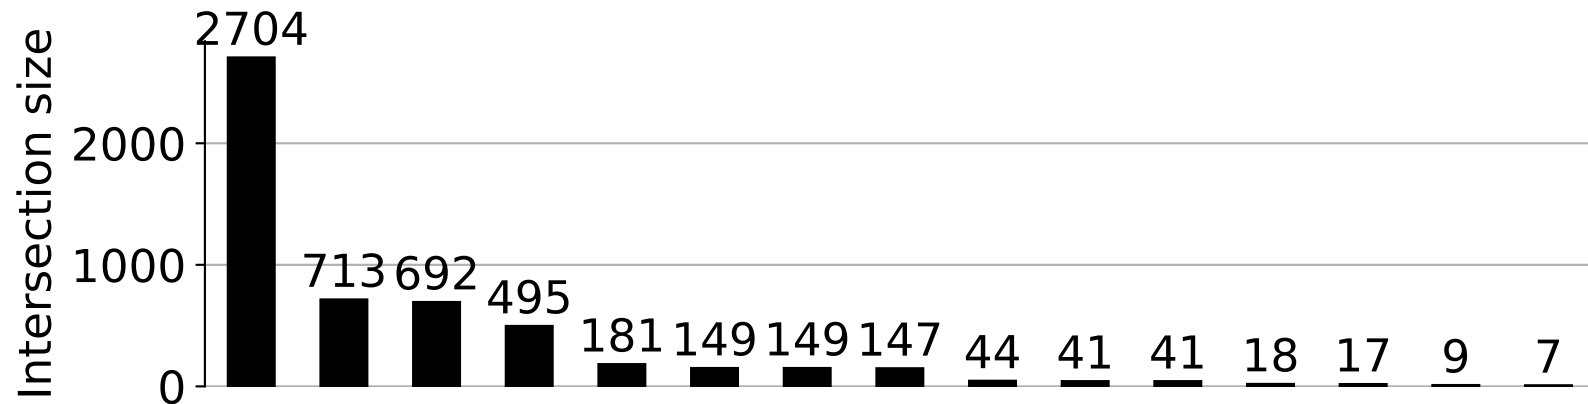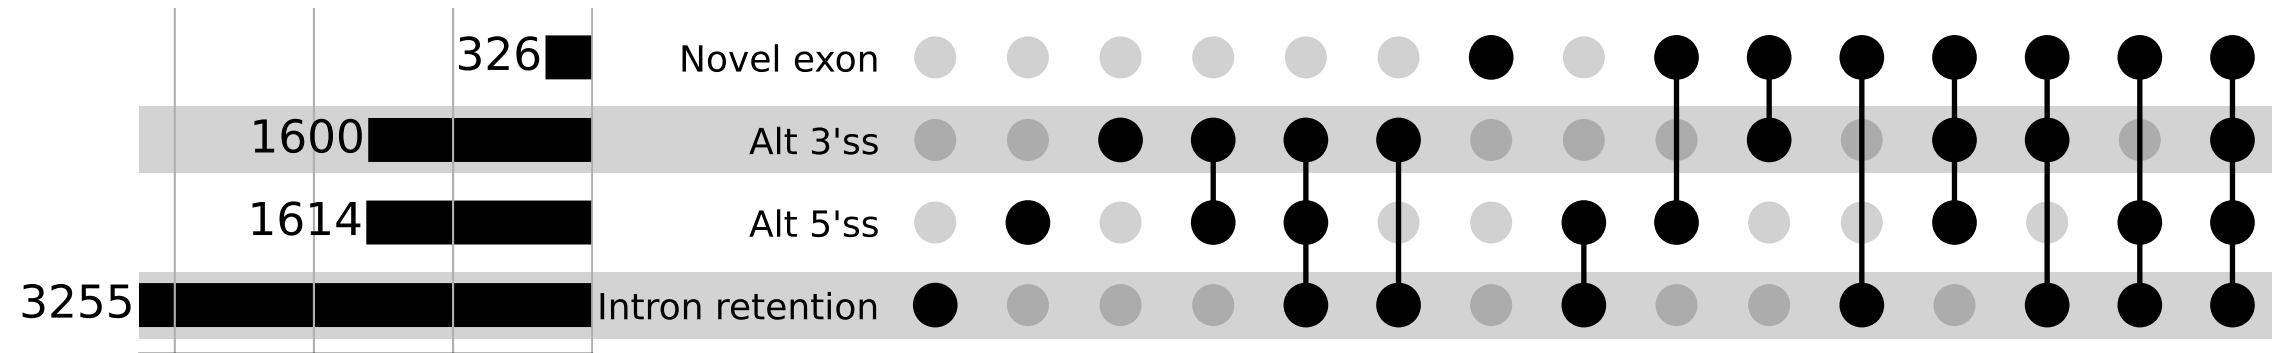

Supplement: Supplemental_code.zip [file Fig_3E_isq_pcb_novel.pdf › Supplemental_code/figures/Fig_3/Fig_3E_isq_pcb_novel.pdf]

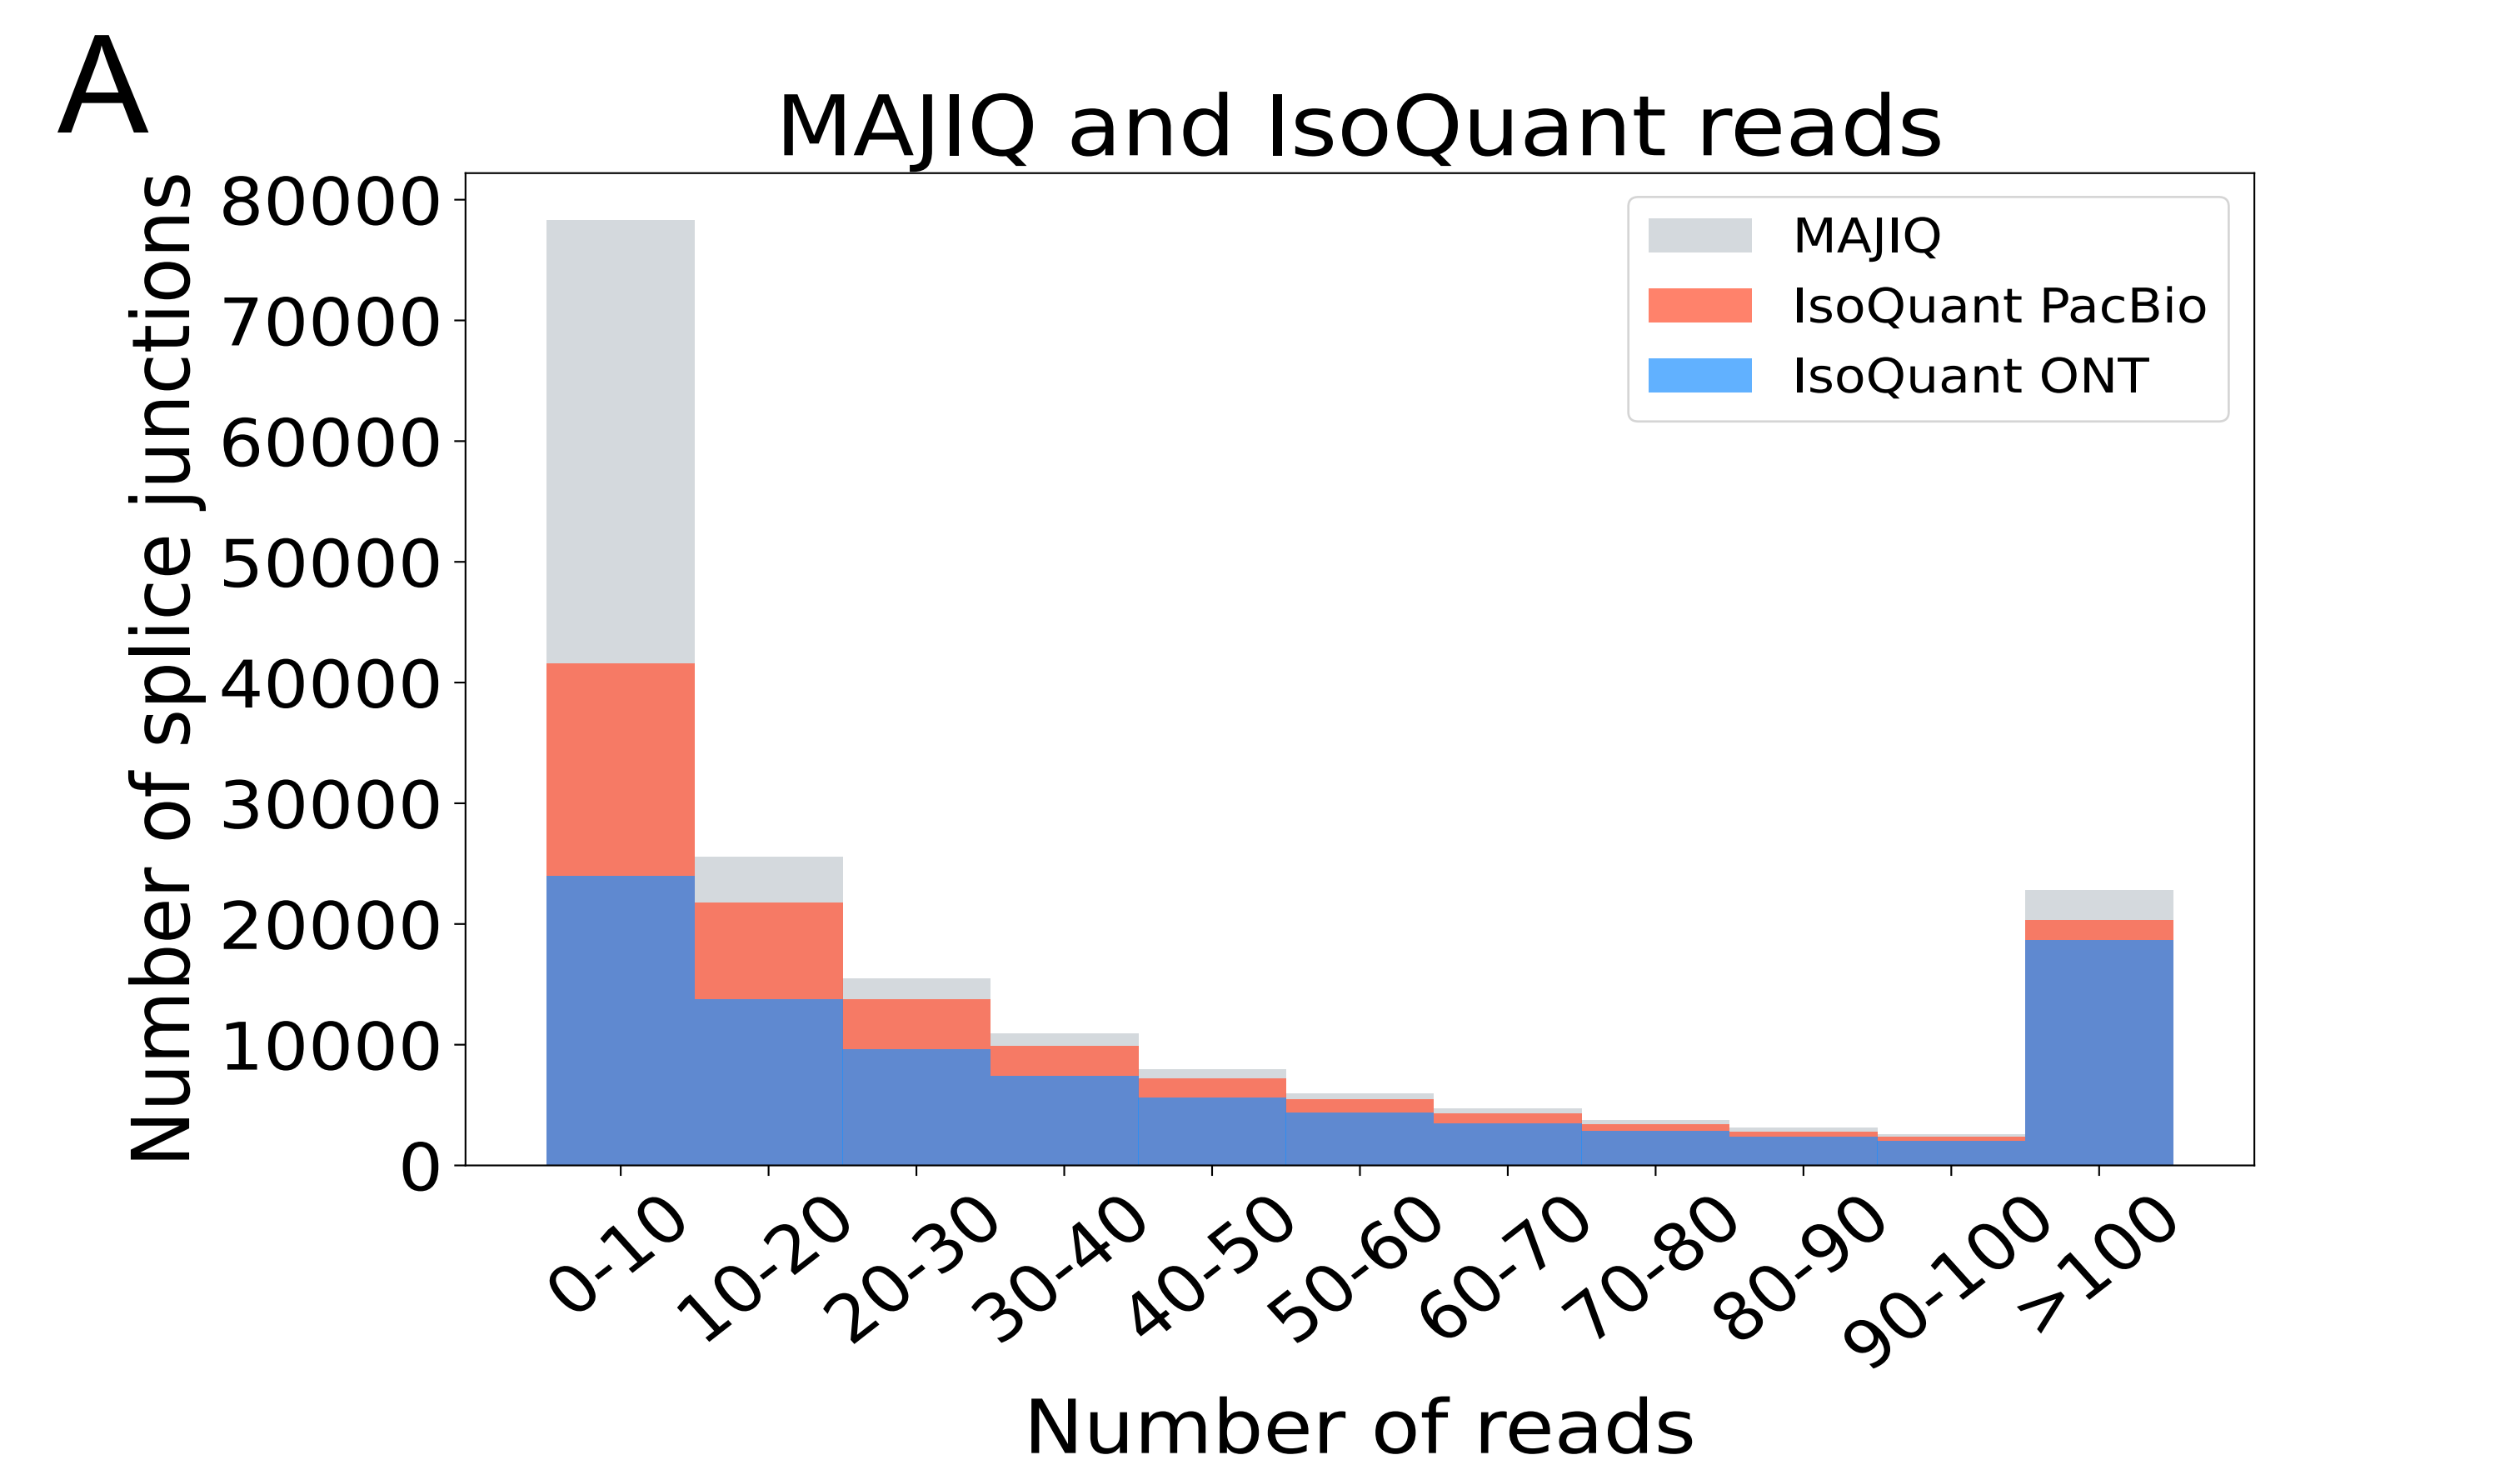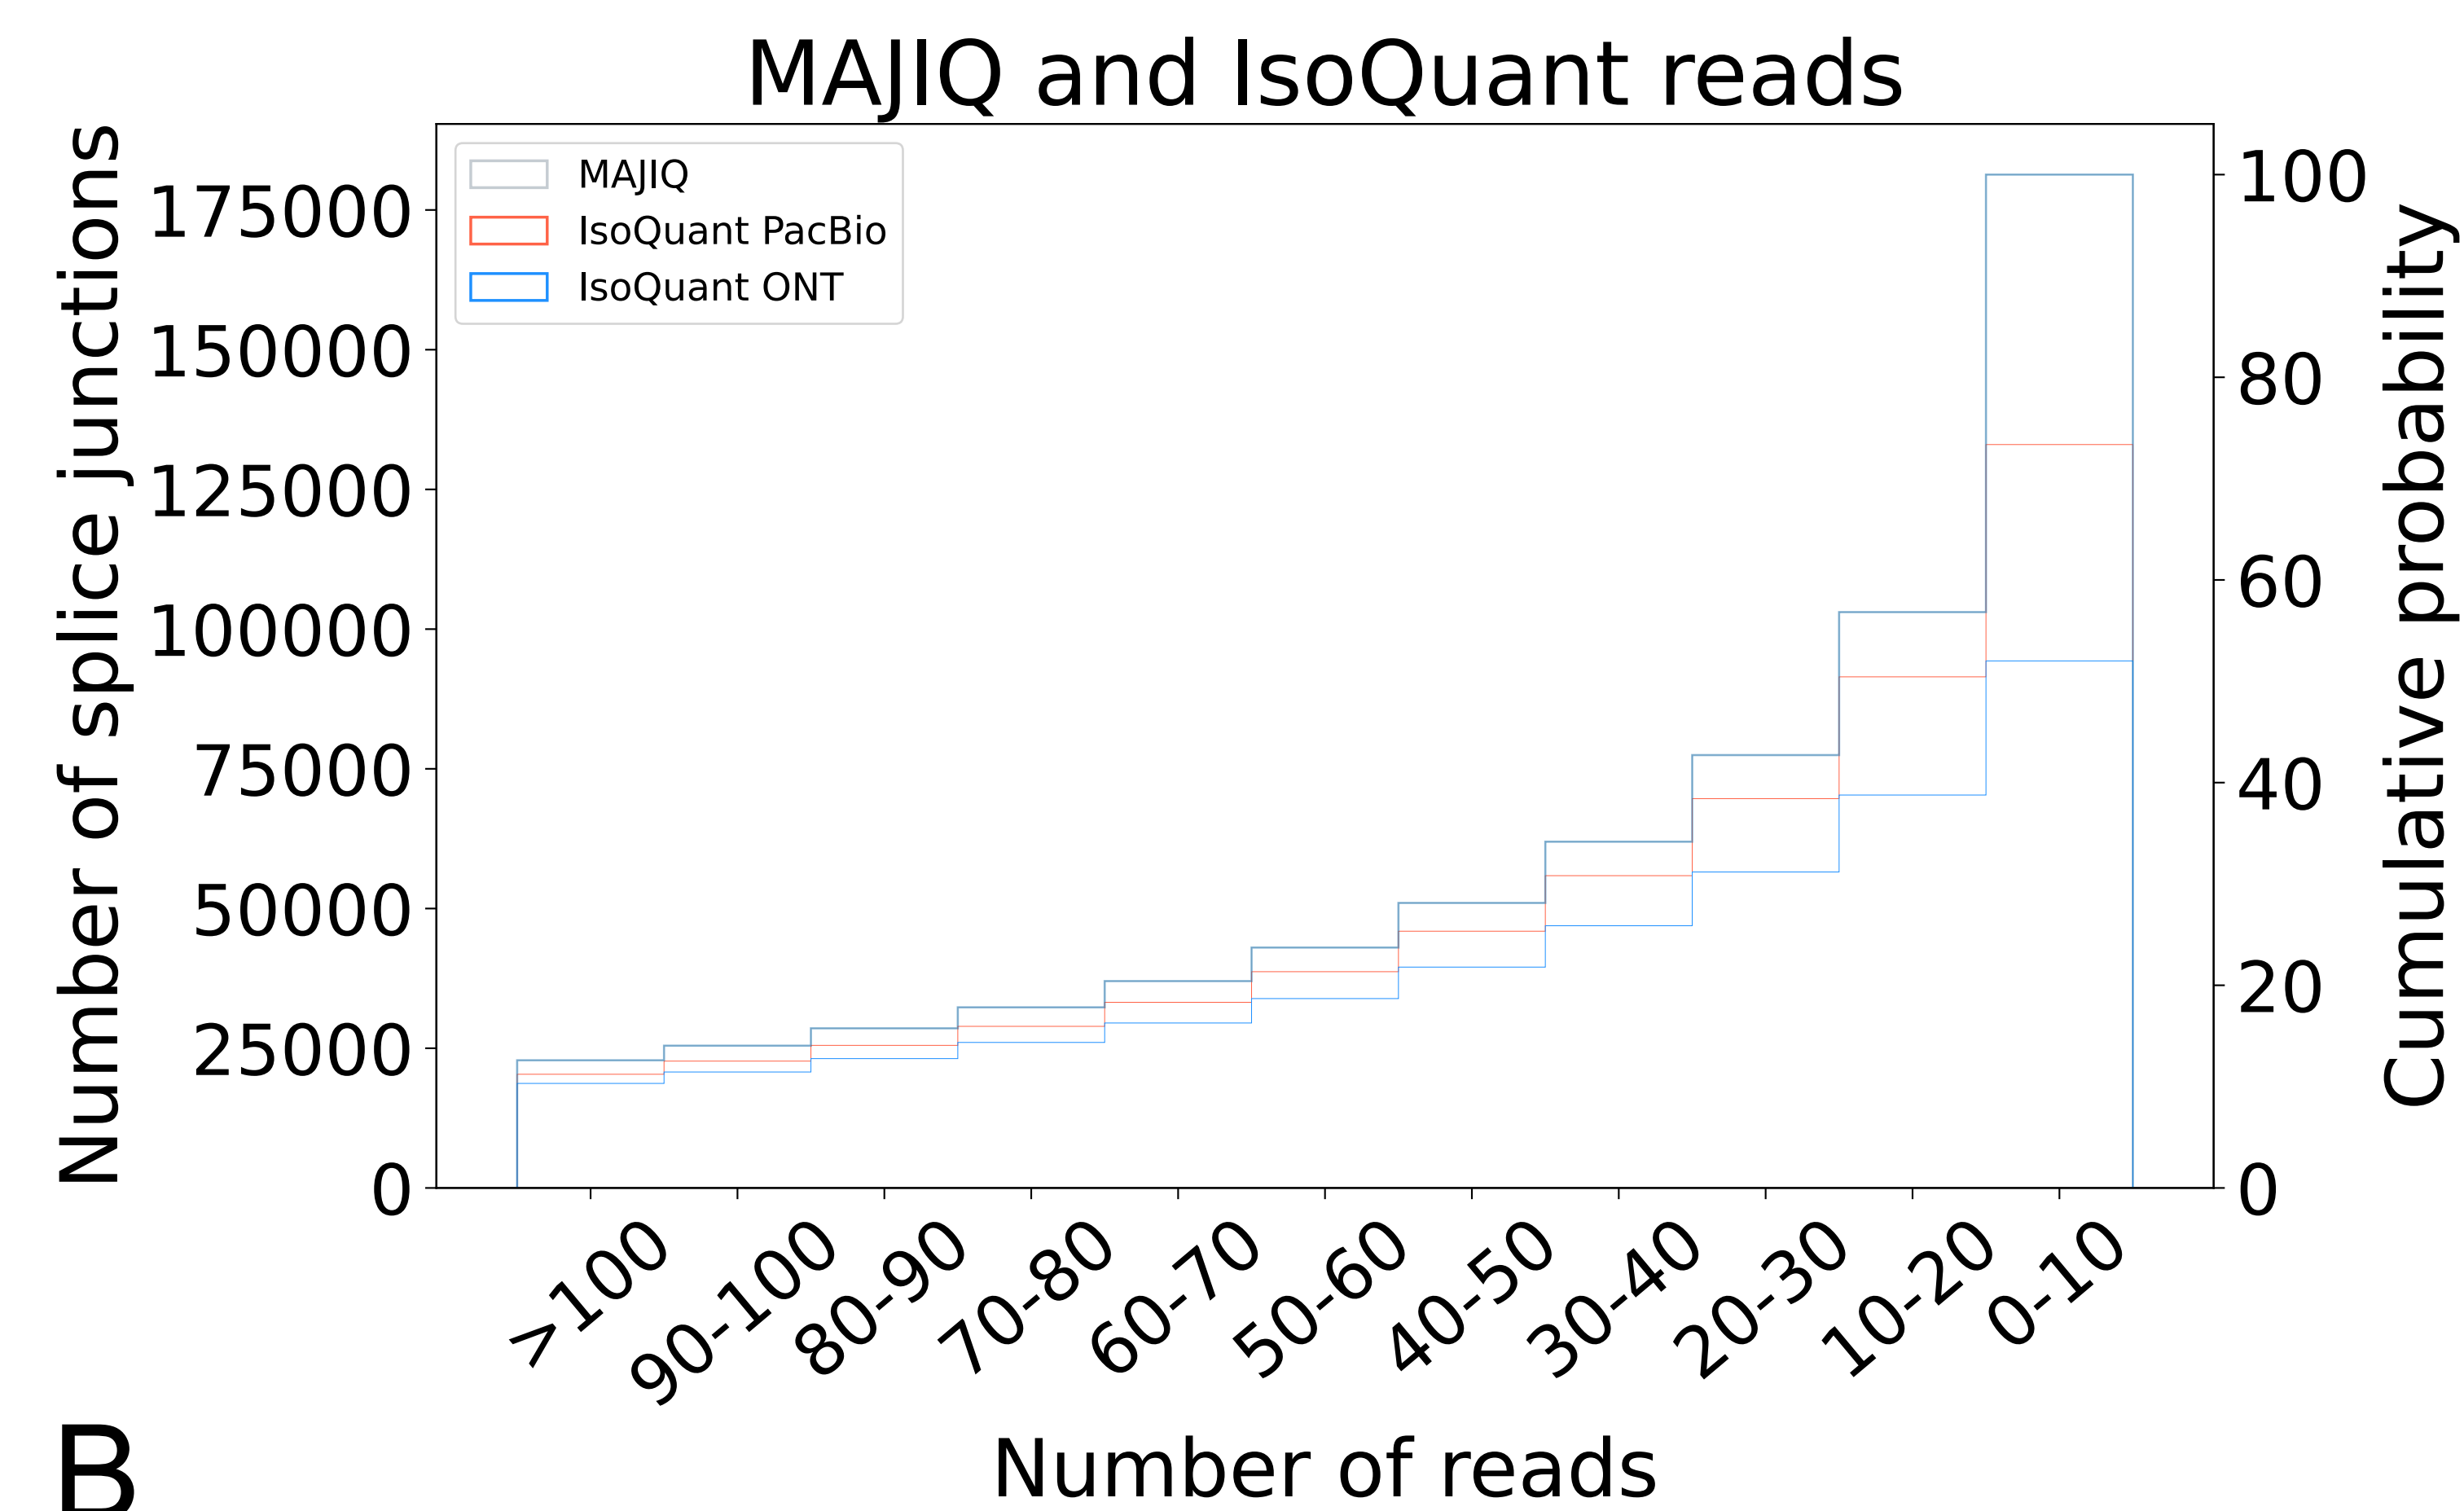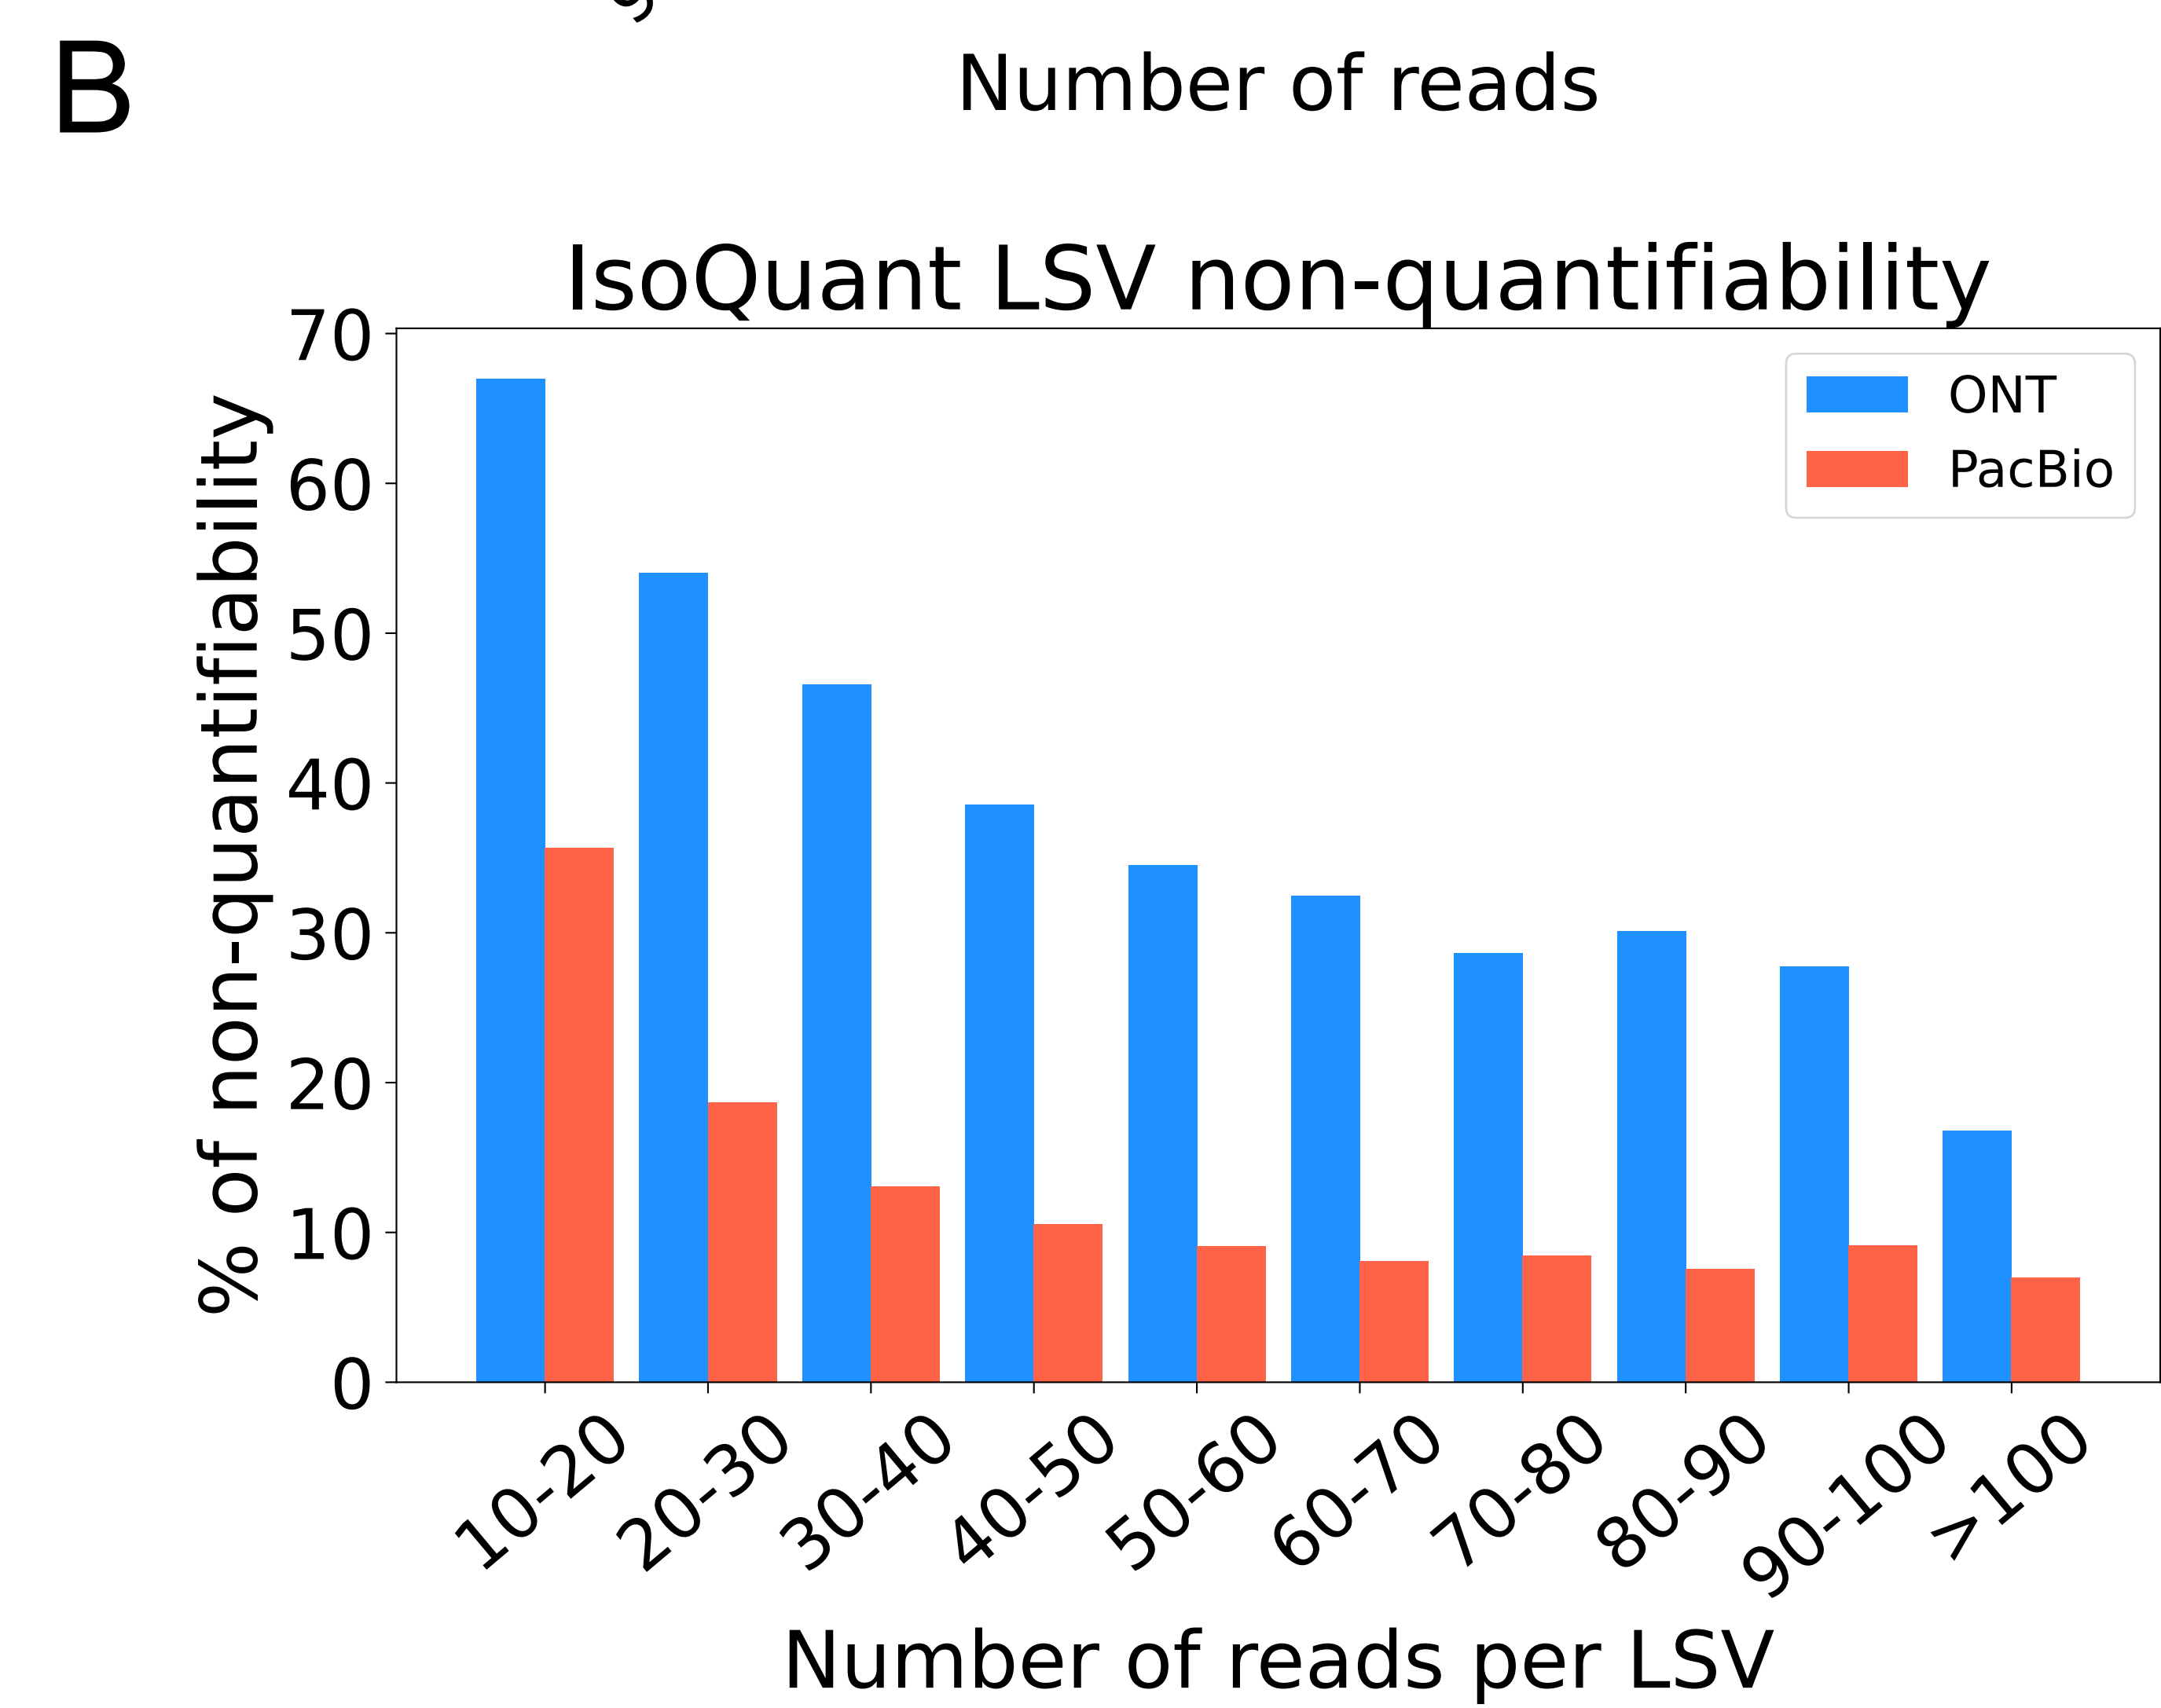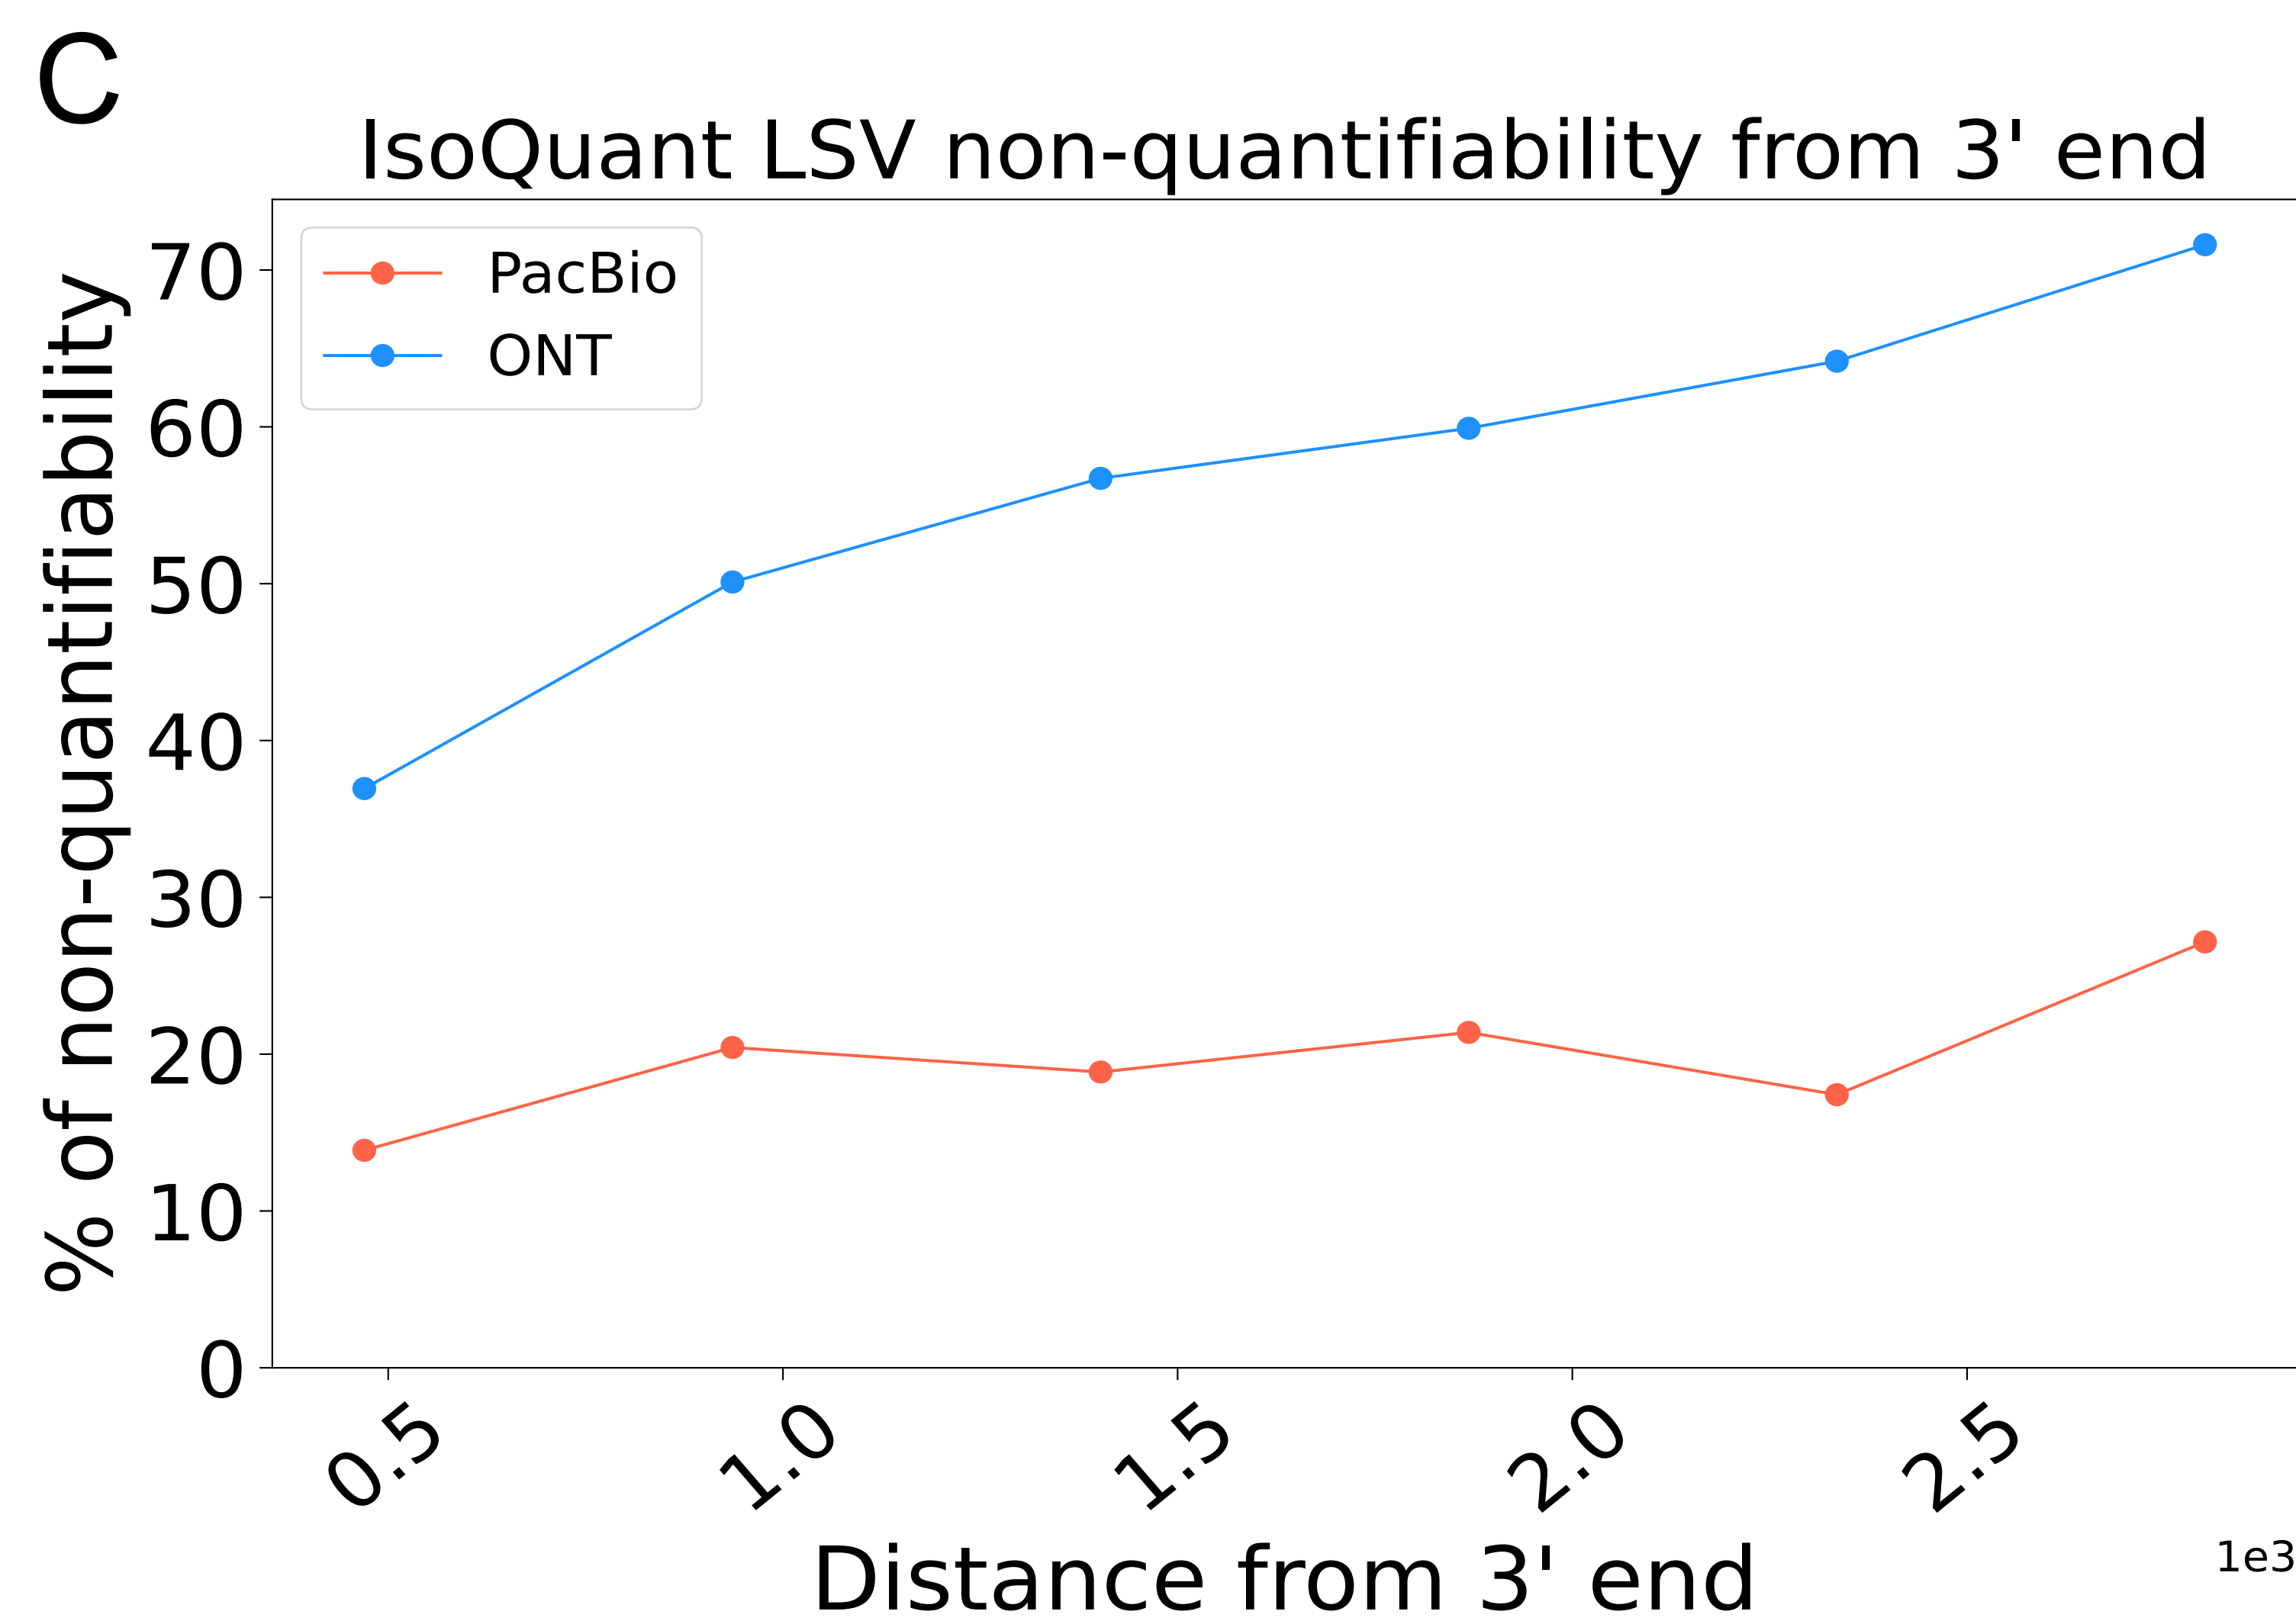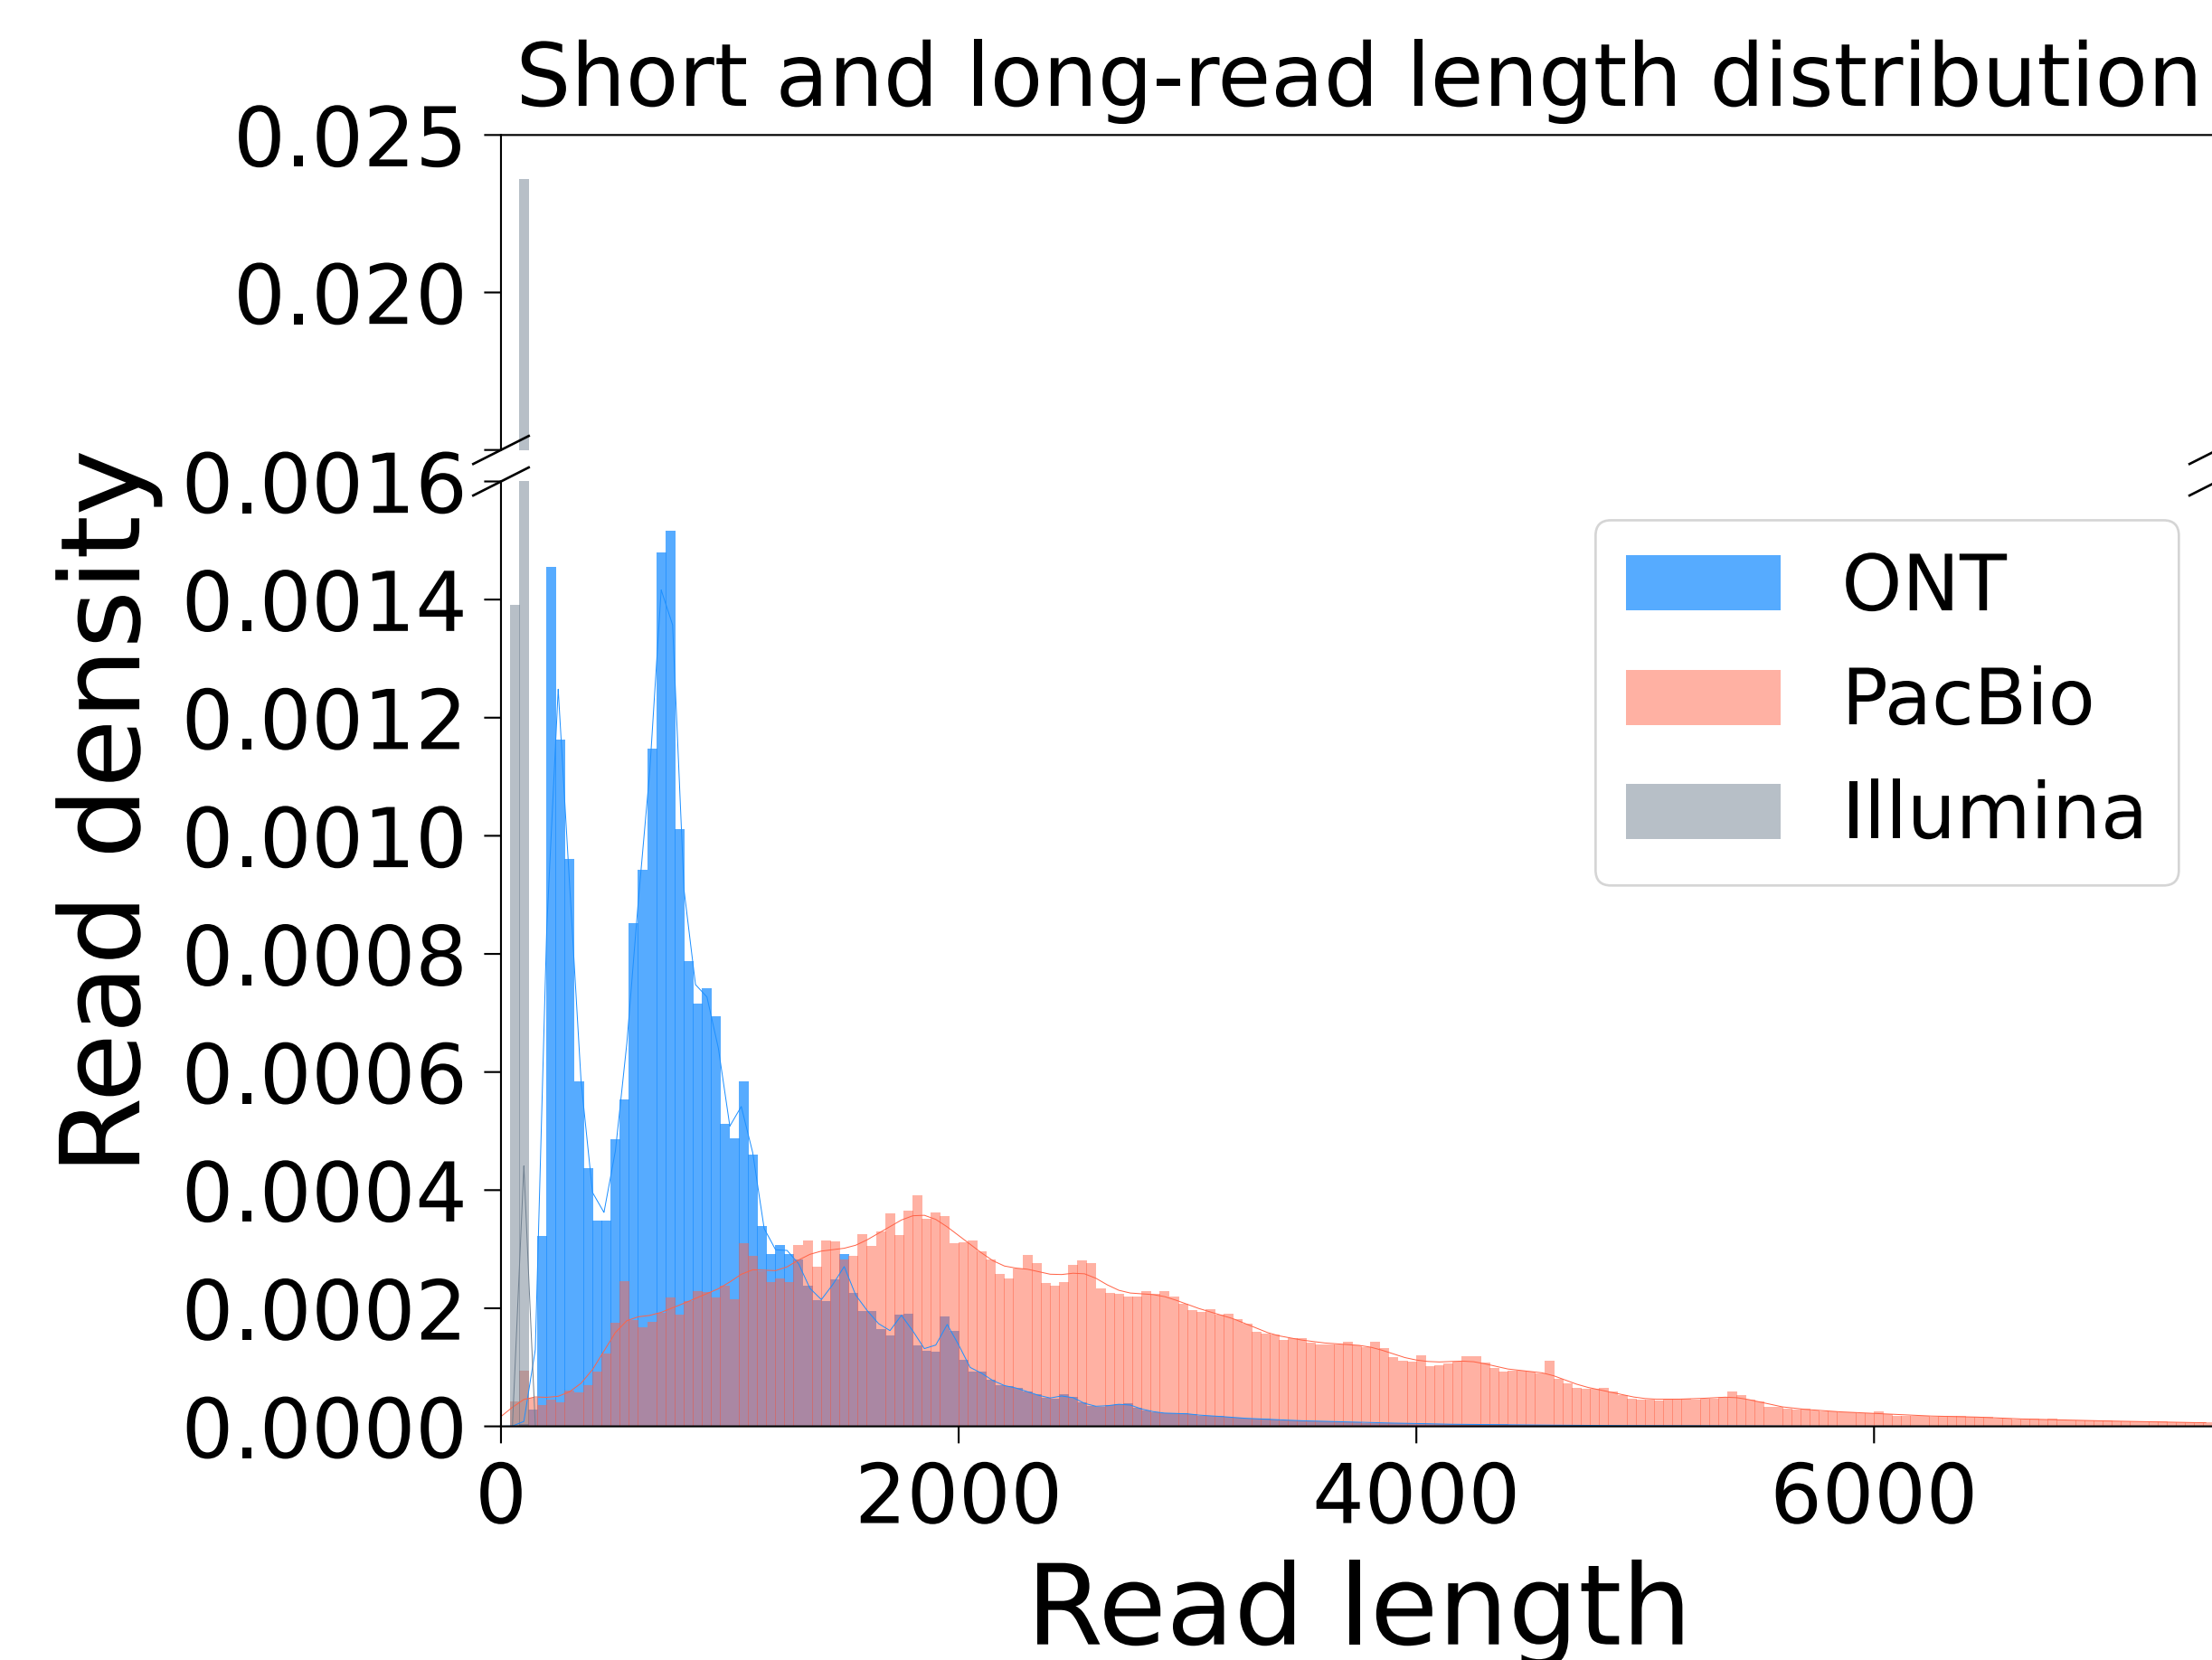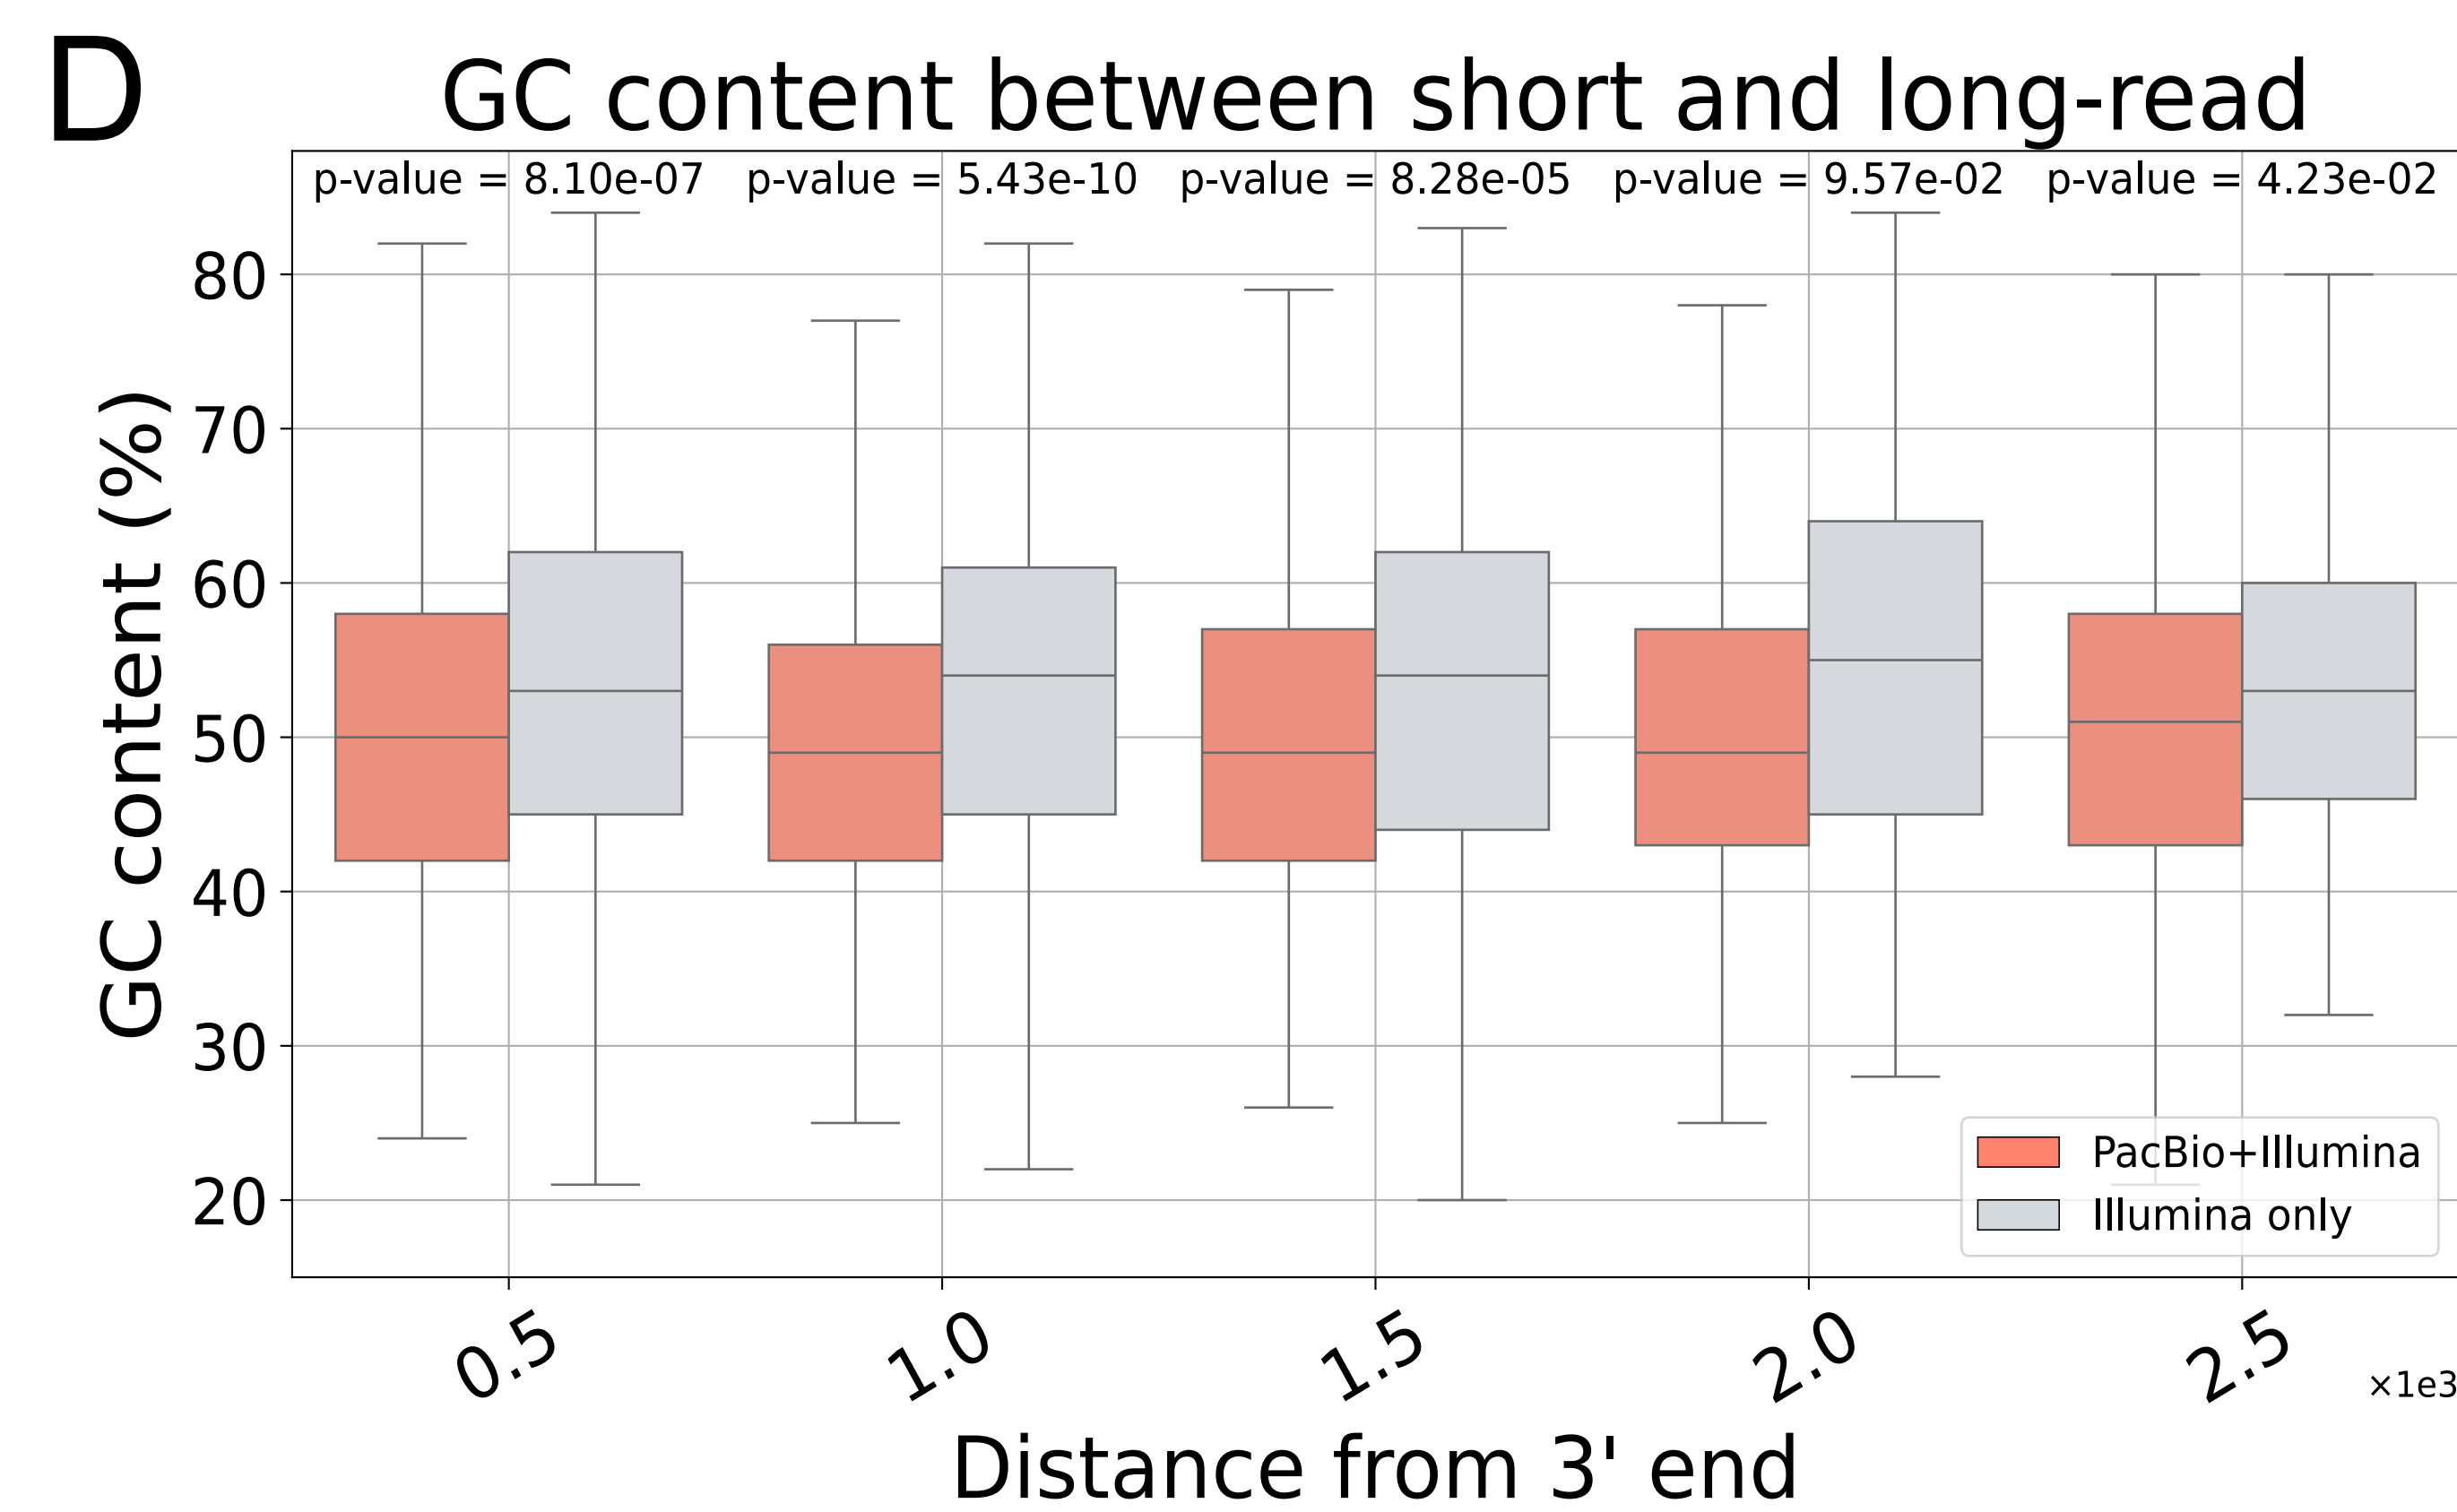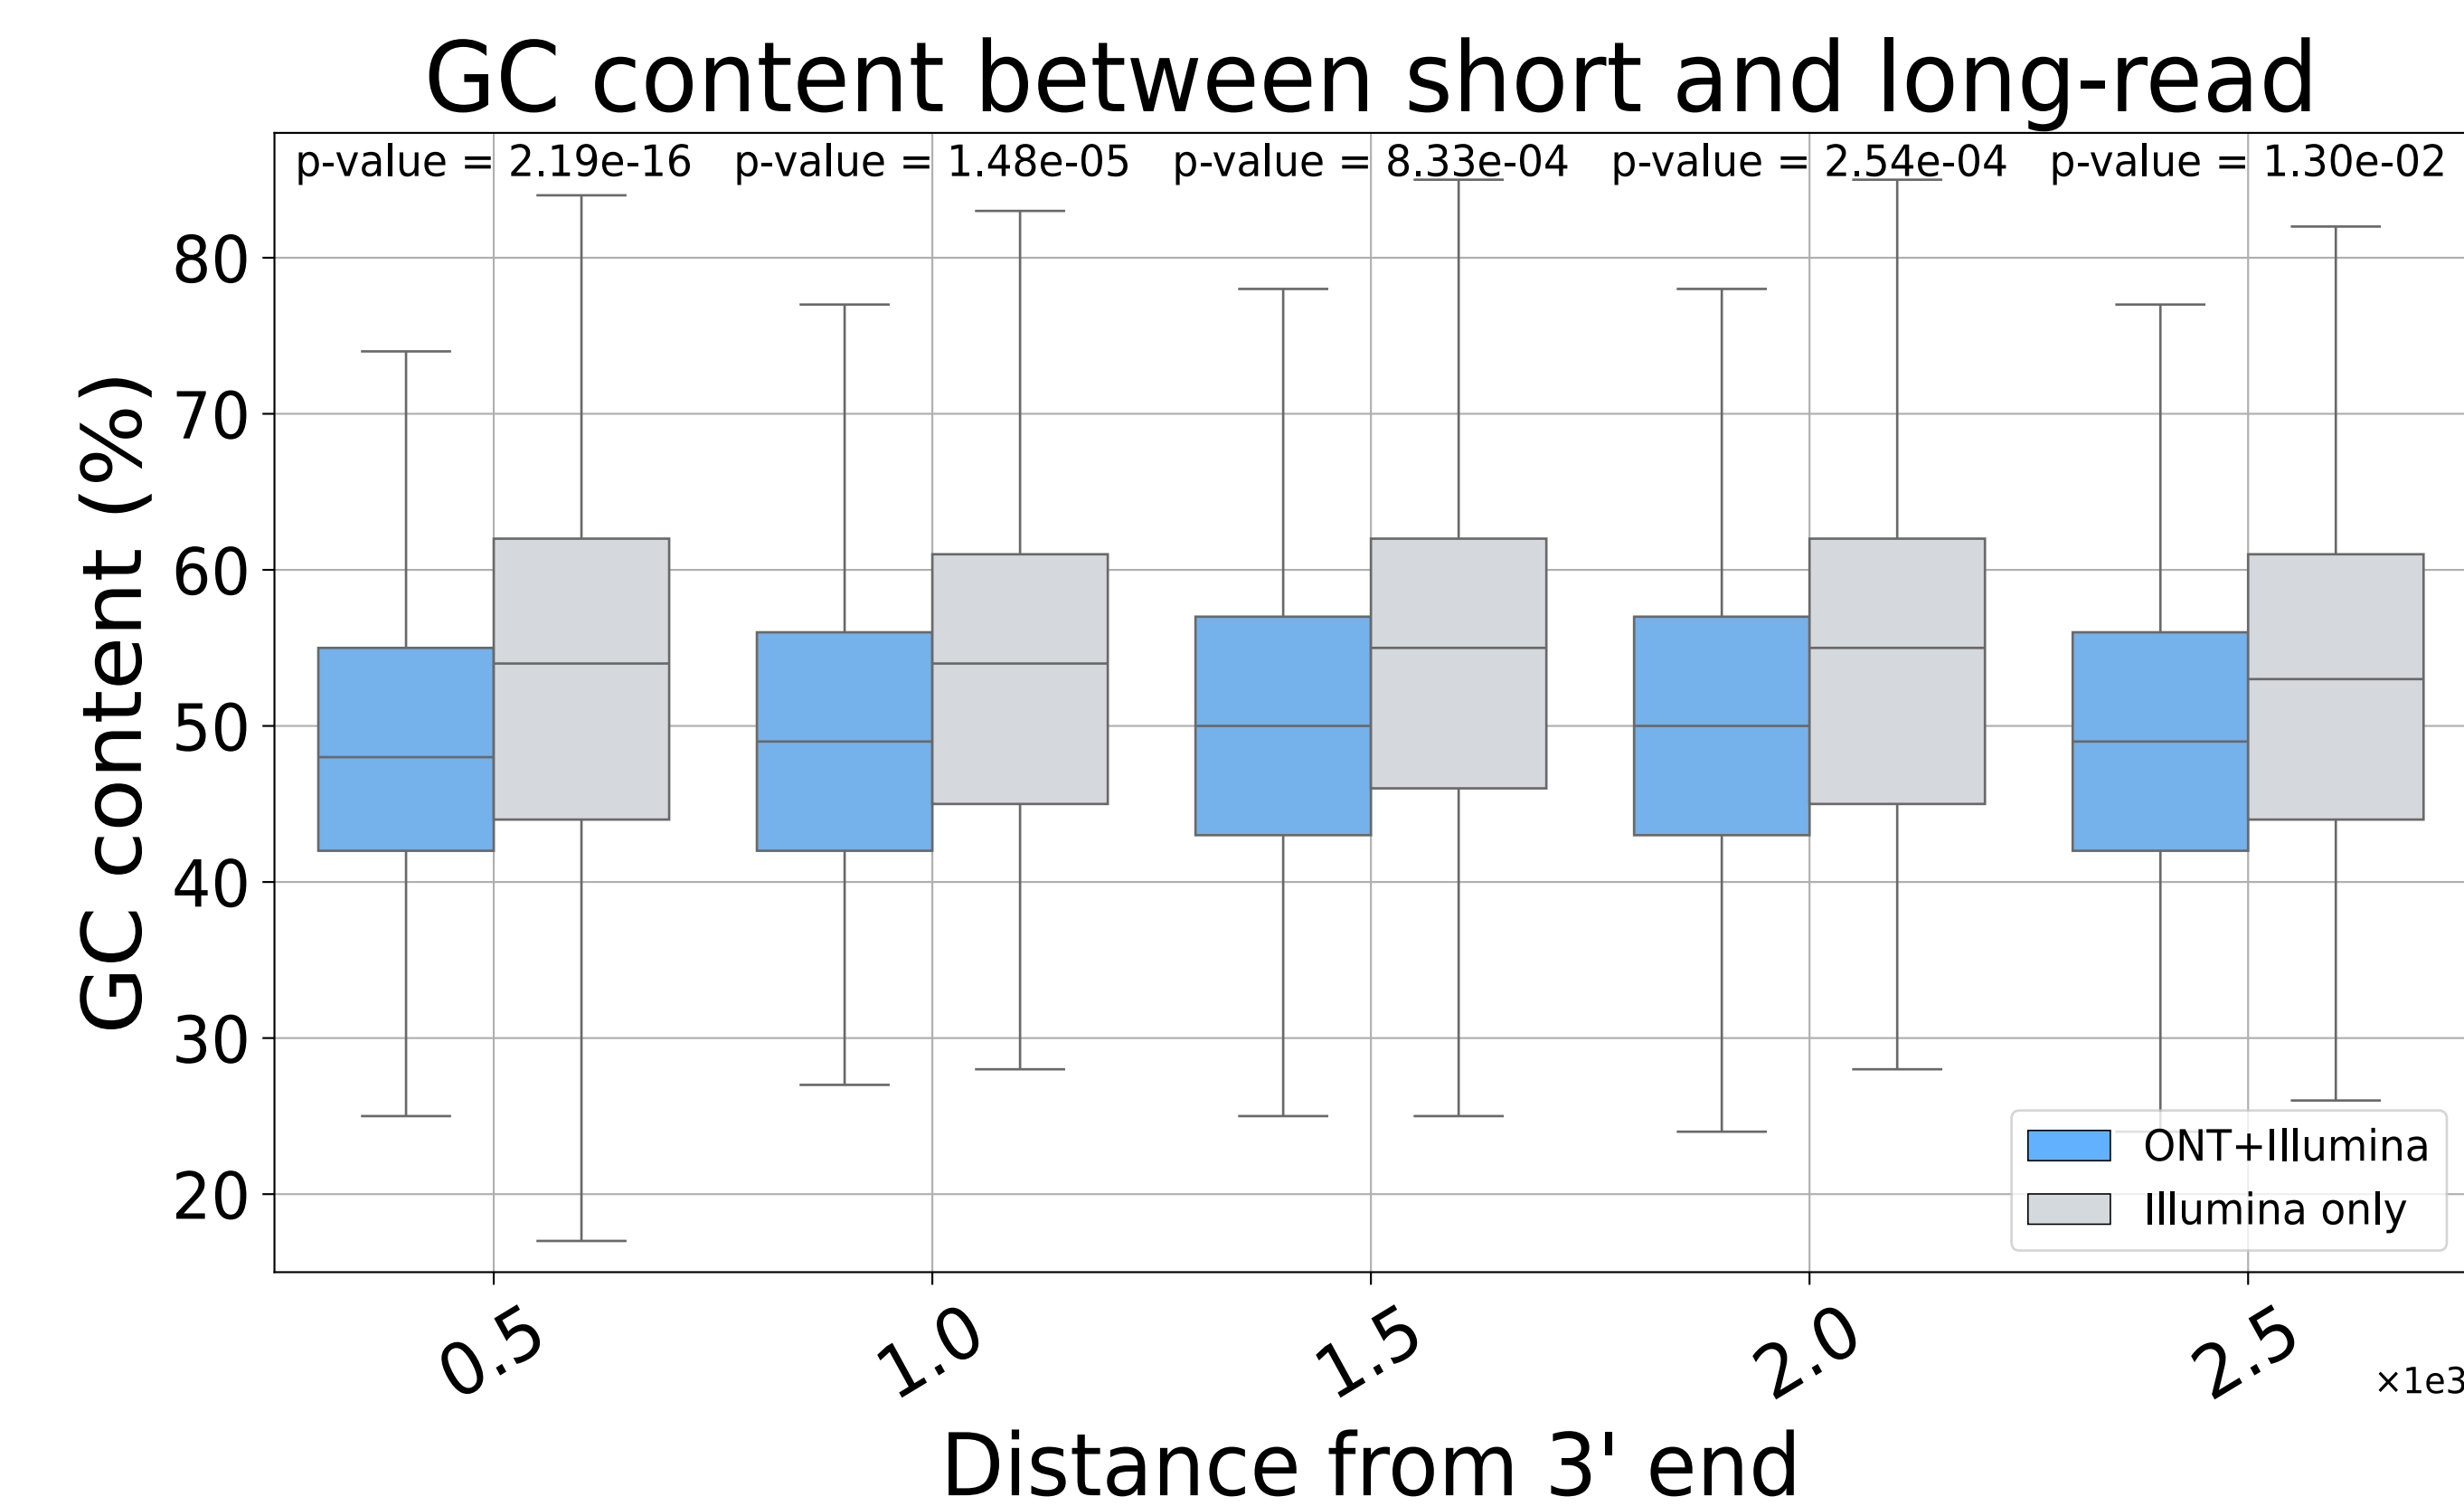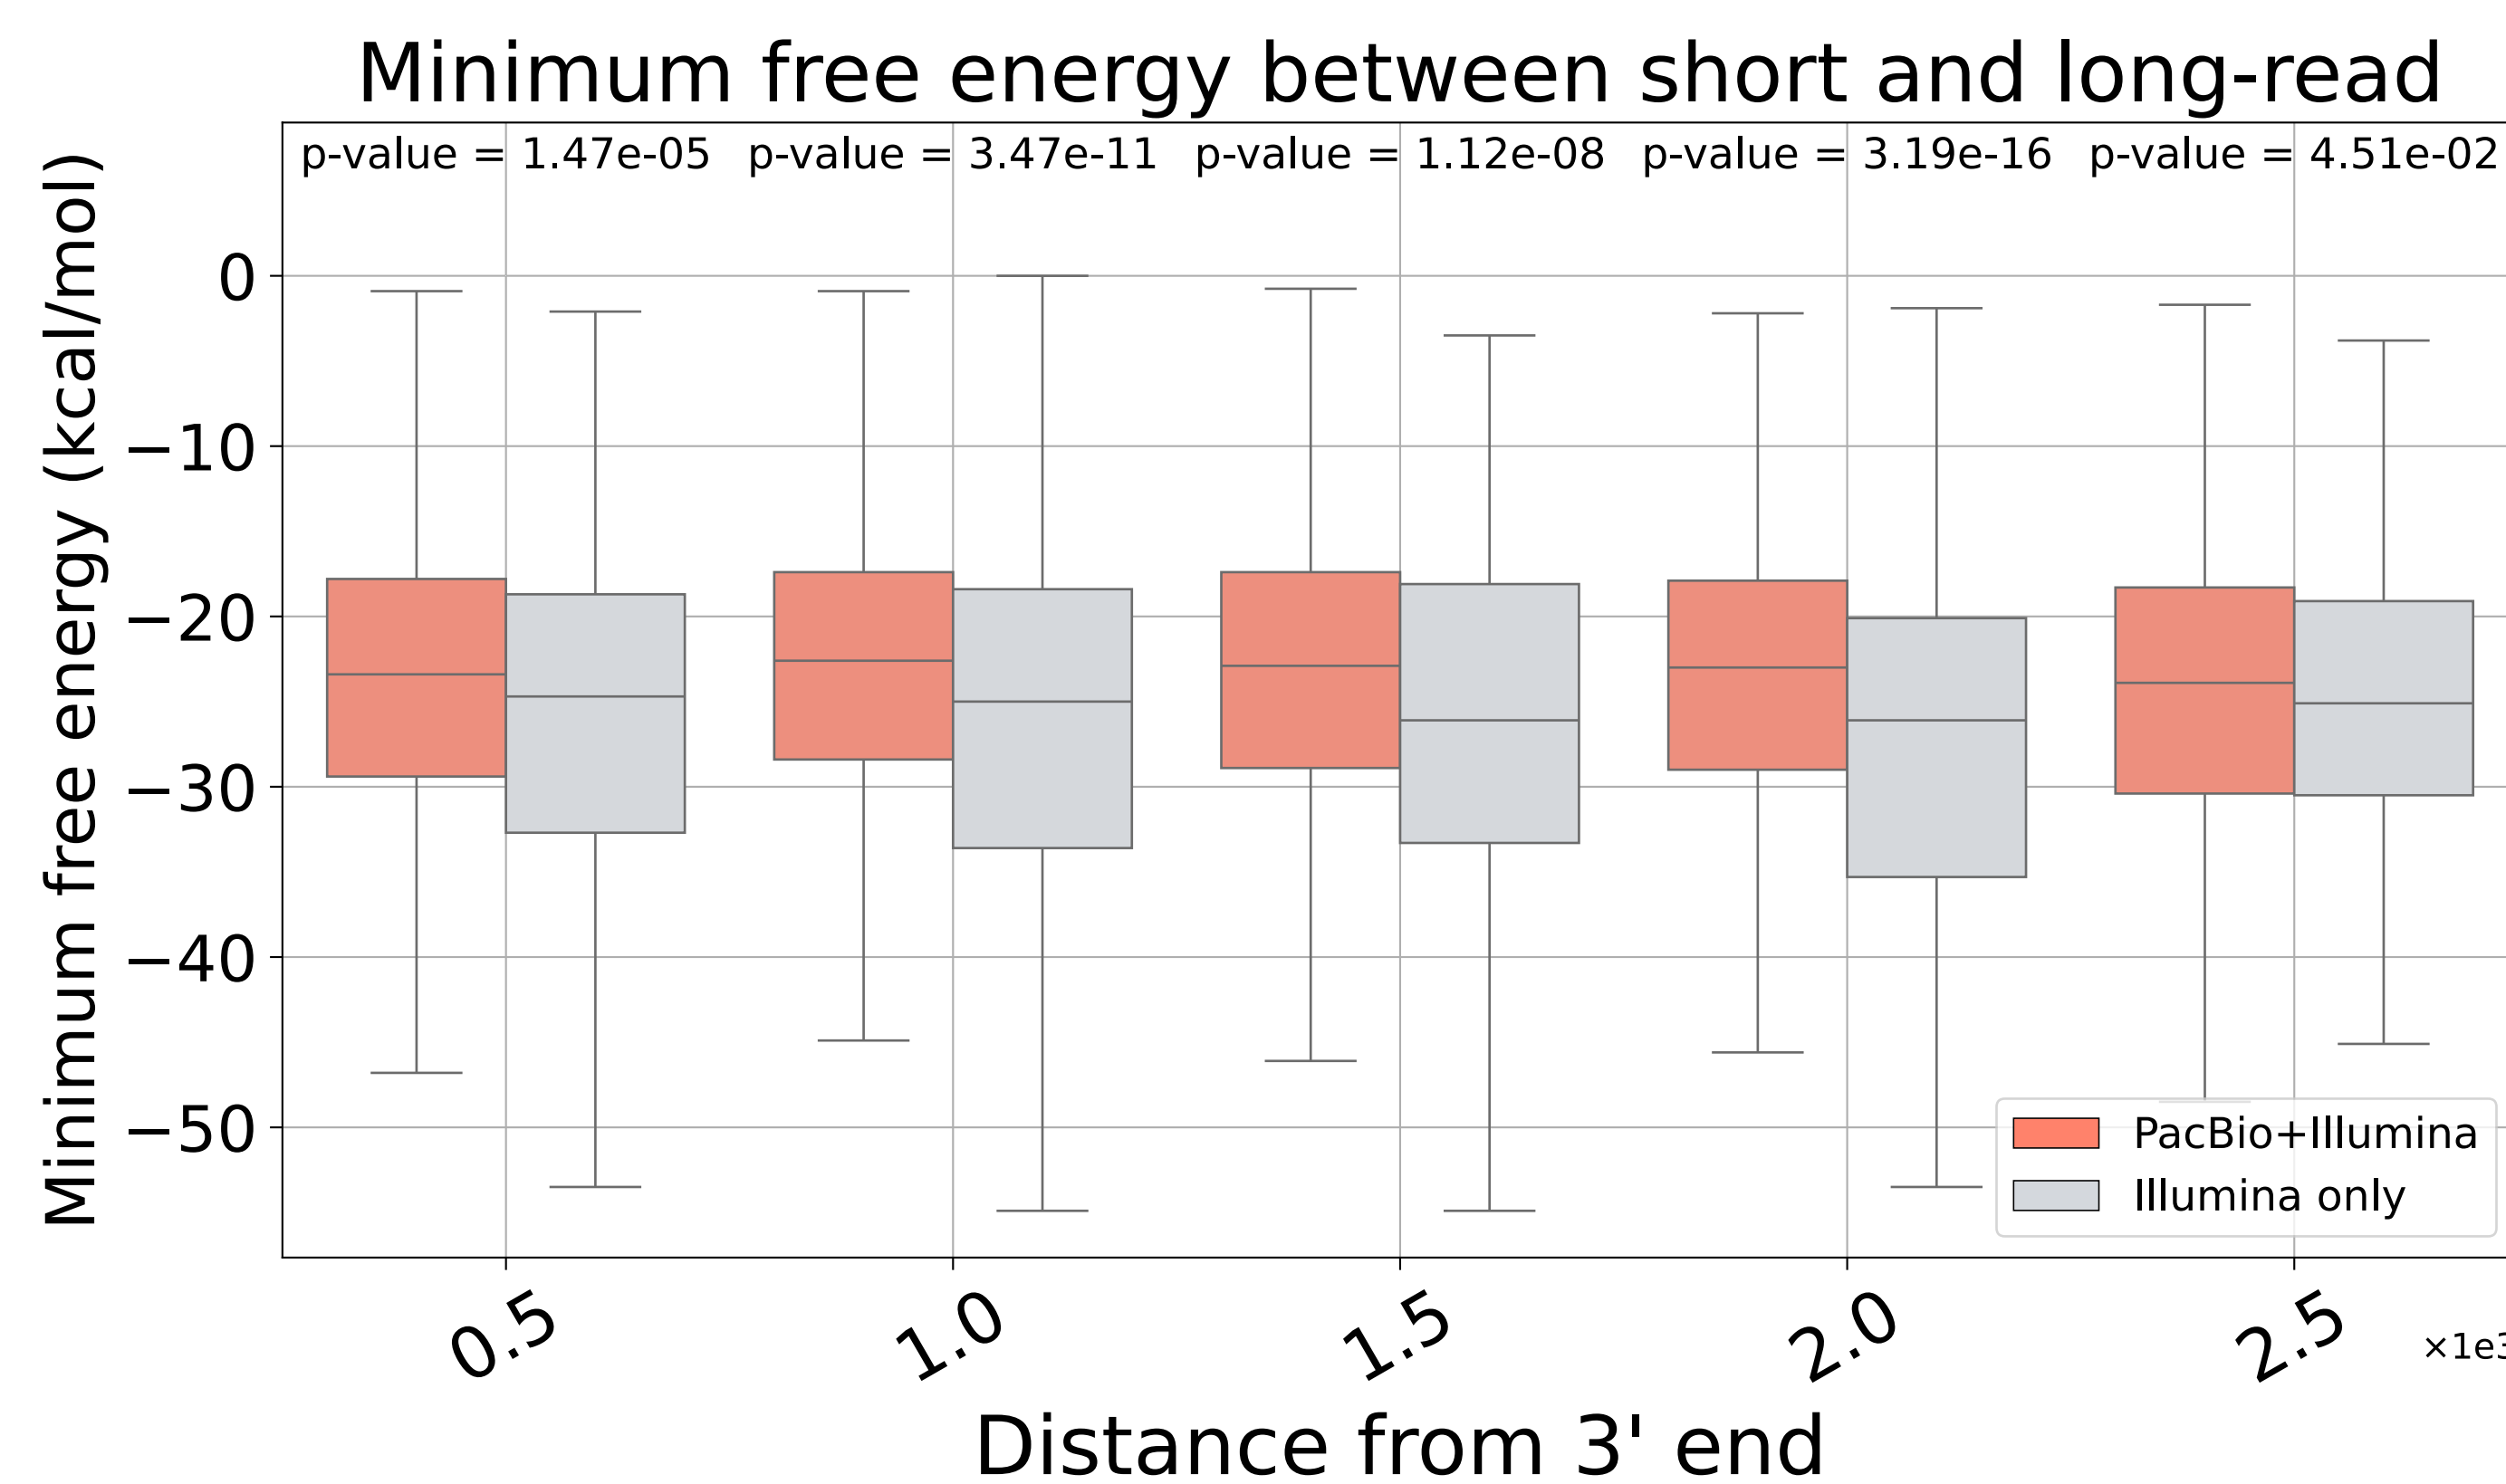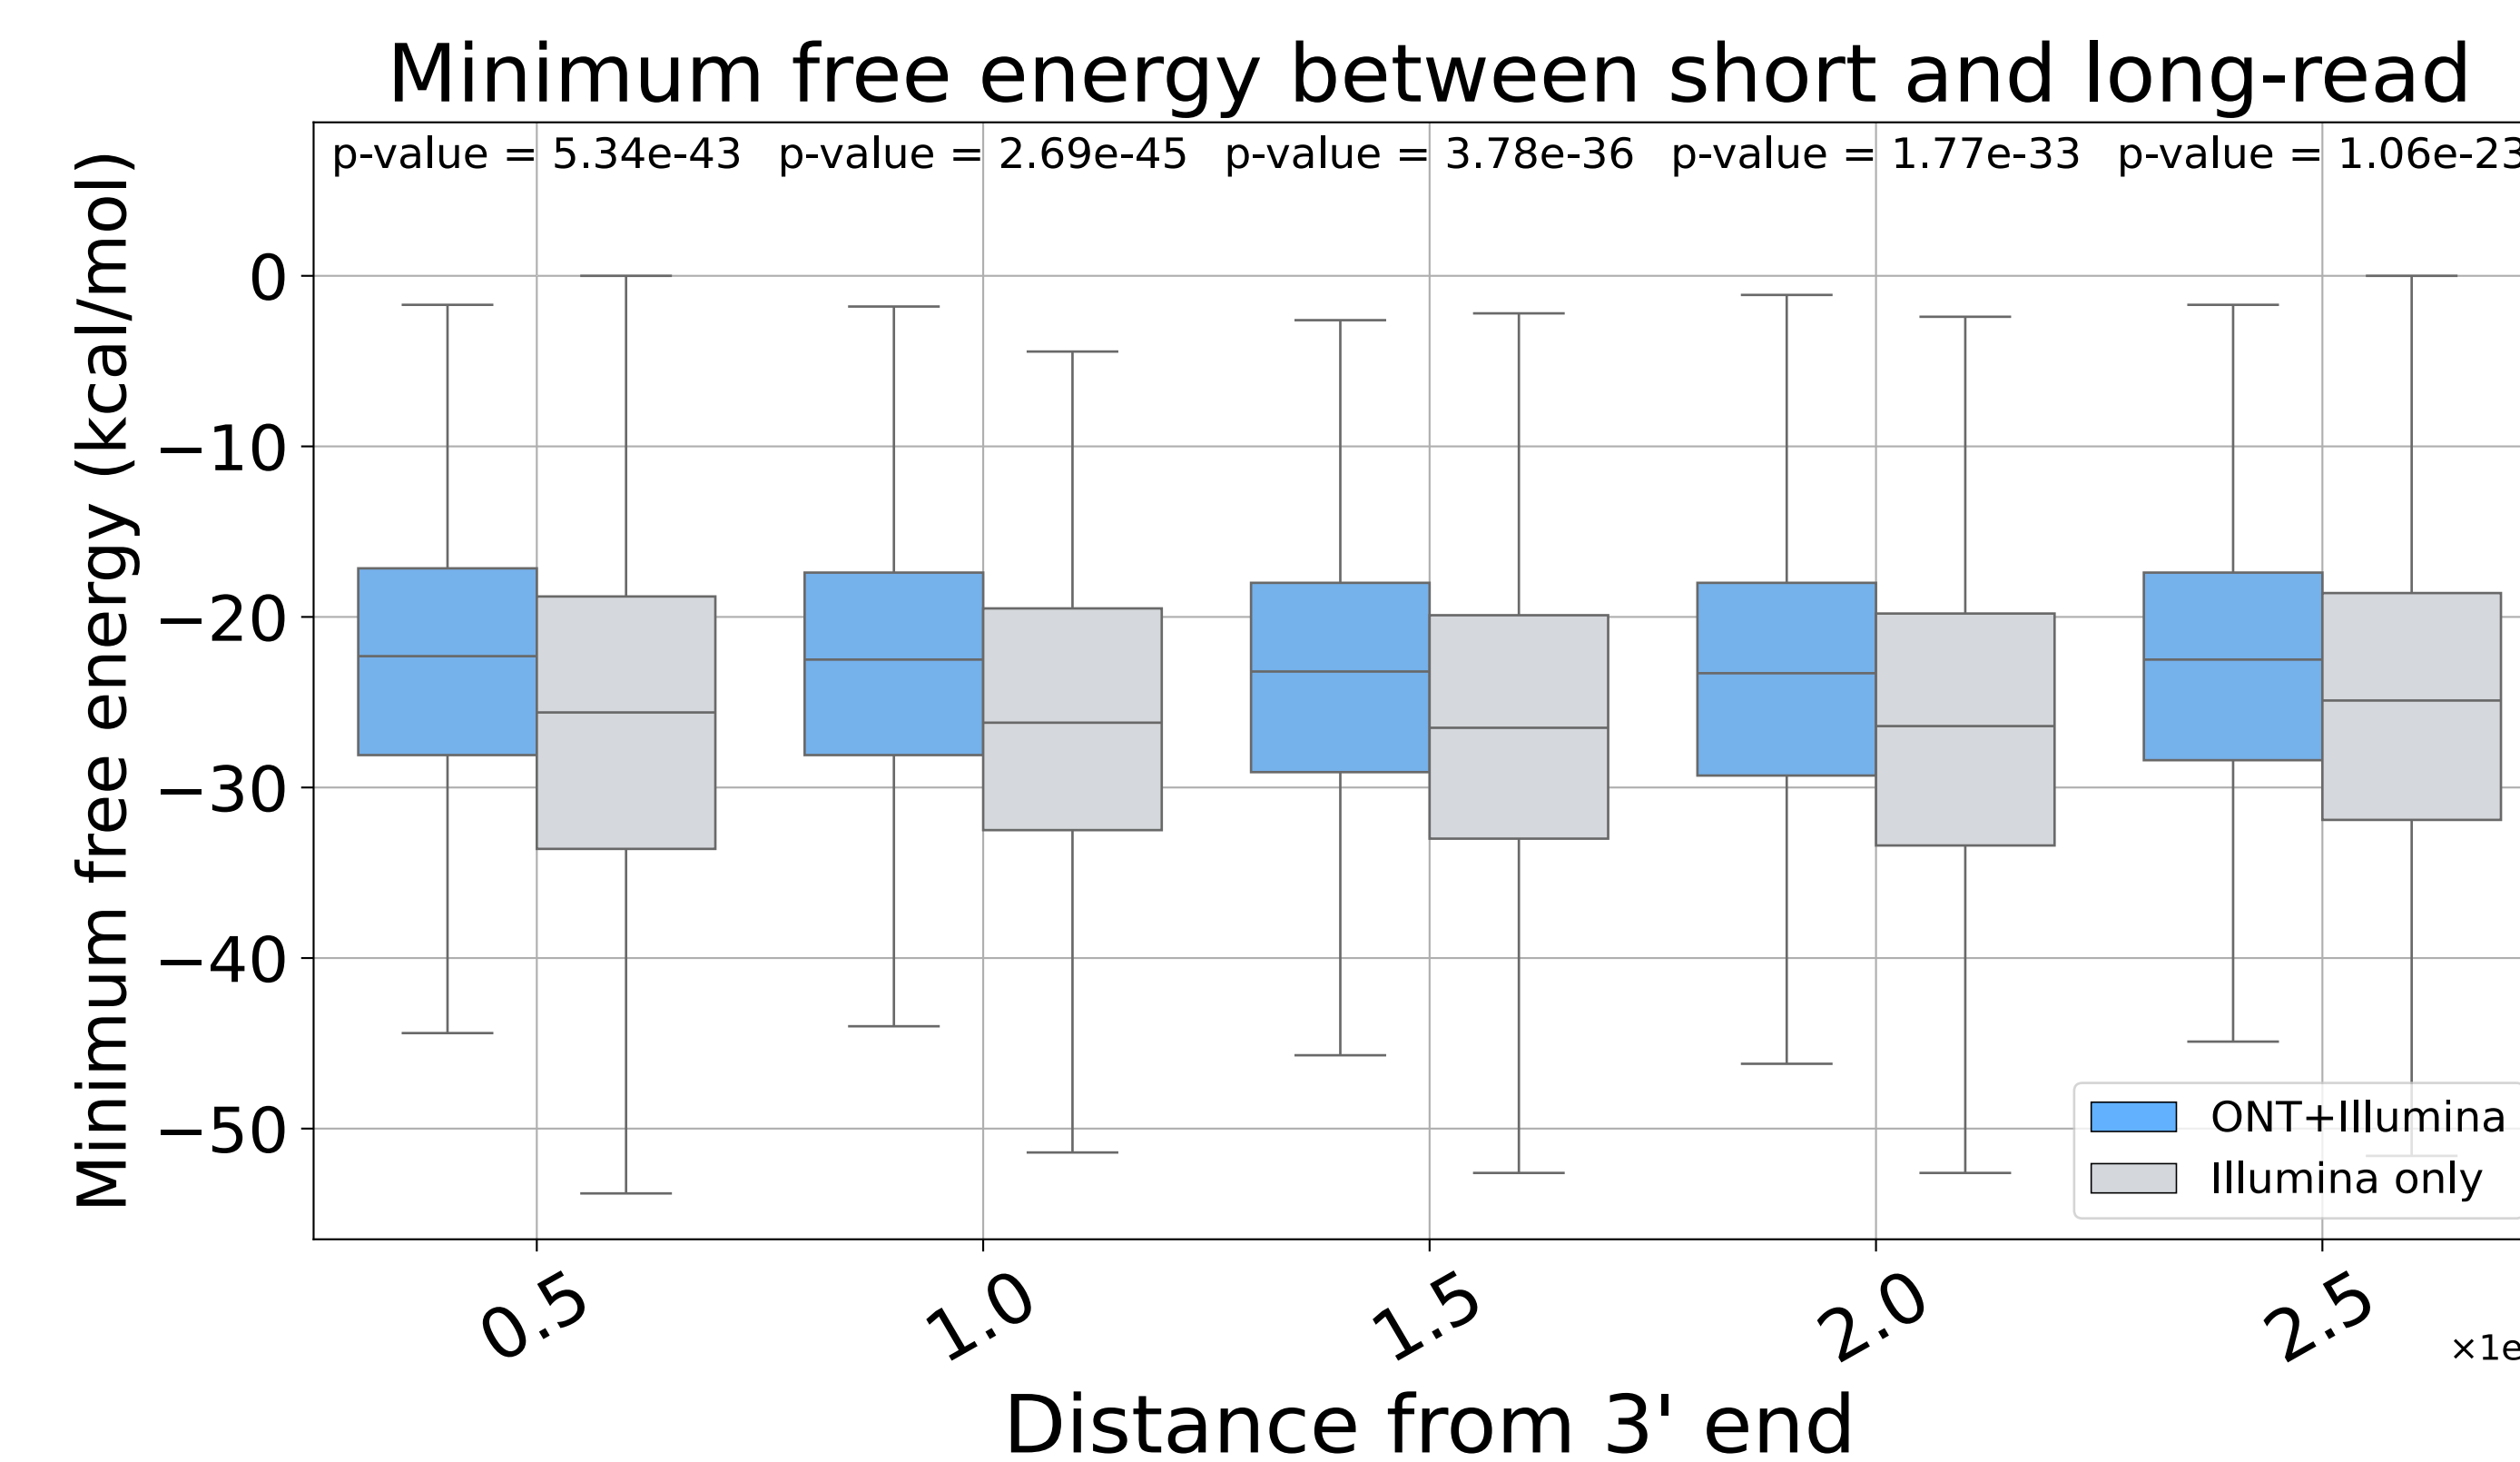

Supplement: Supplemental_code.zip [file Fig_4.pdf › Supplemental_code/figures/Fig_4/Fig_4.pdf]

# MAJIQ and IsoQuant reads

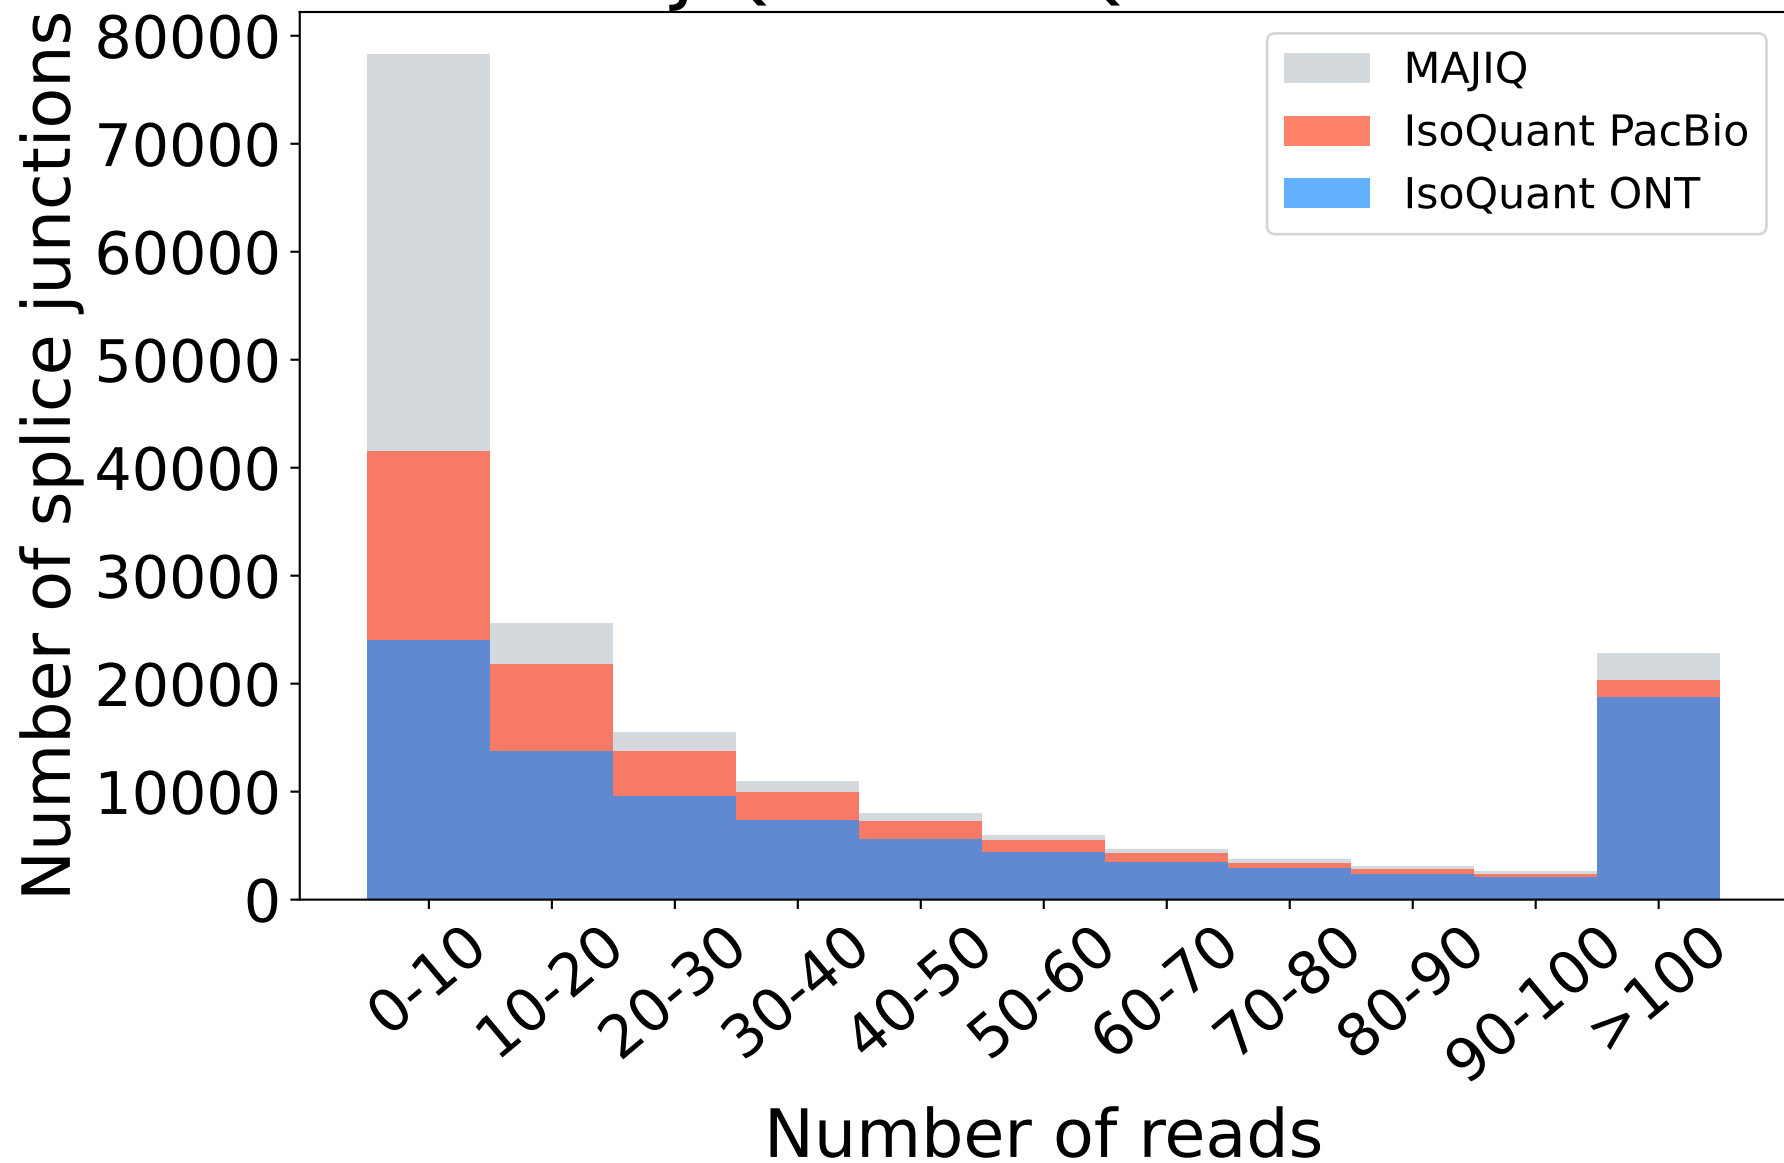

Supplement: Supplemental_code.zip [file Fig_4A_isq_read1.pdf › Supplemental_code/figures/Fig_4/Fig_4A_isq_read1.pdf]

# MAJIQ and IsoQuant reads

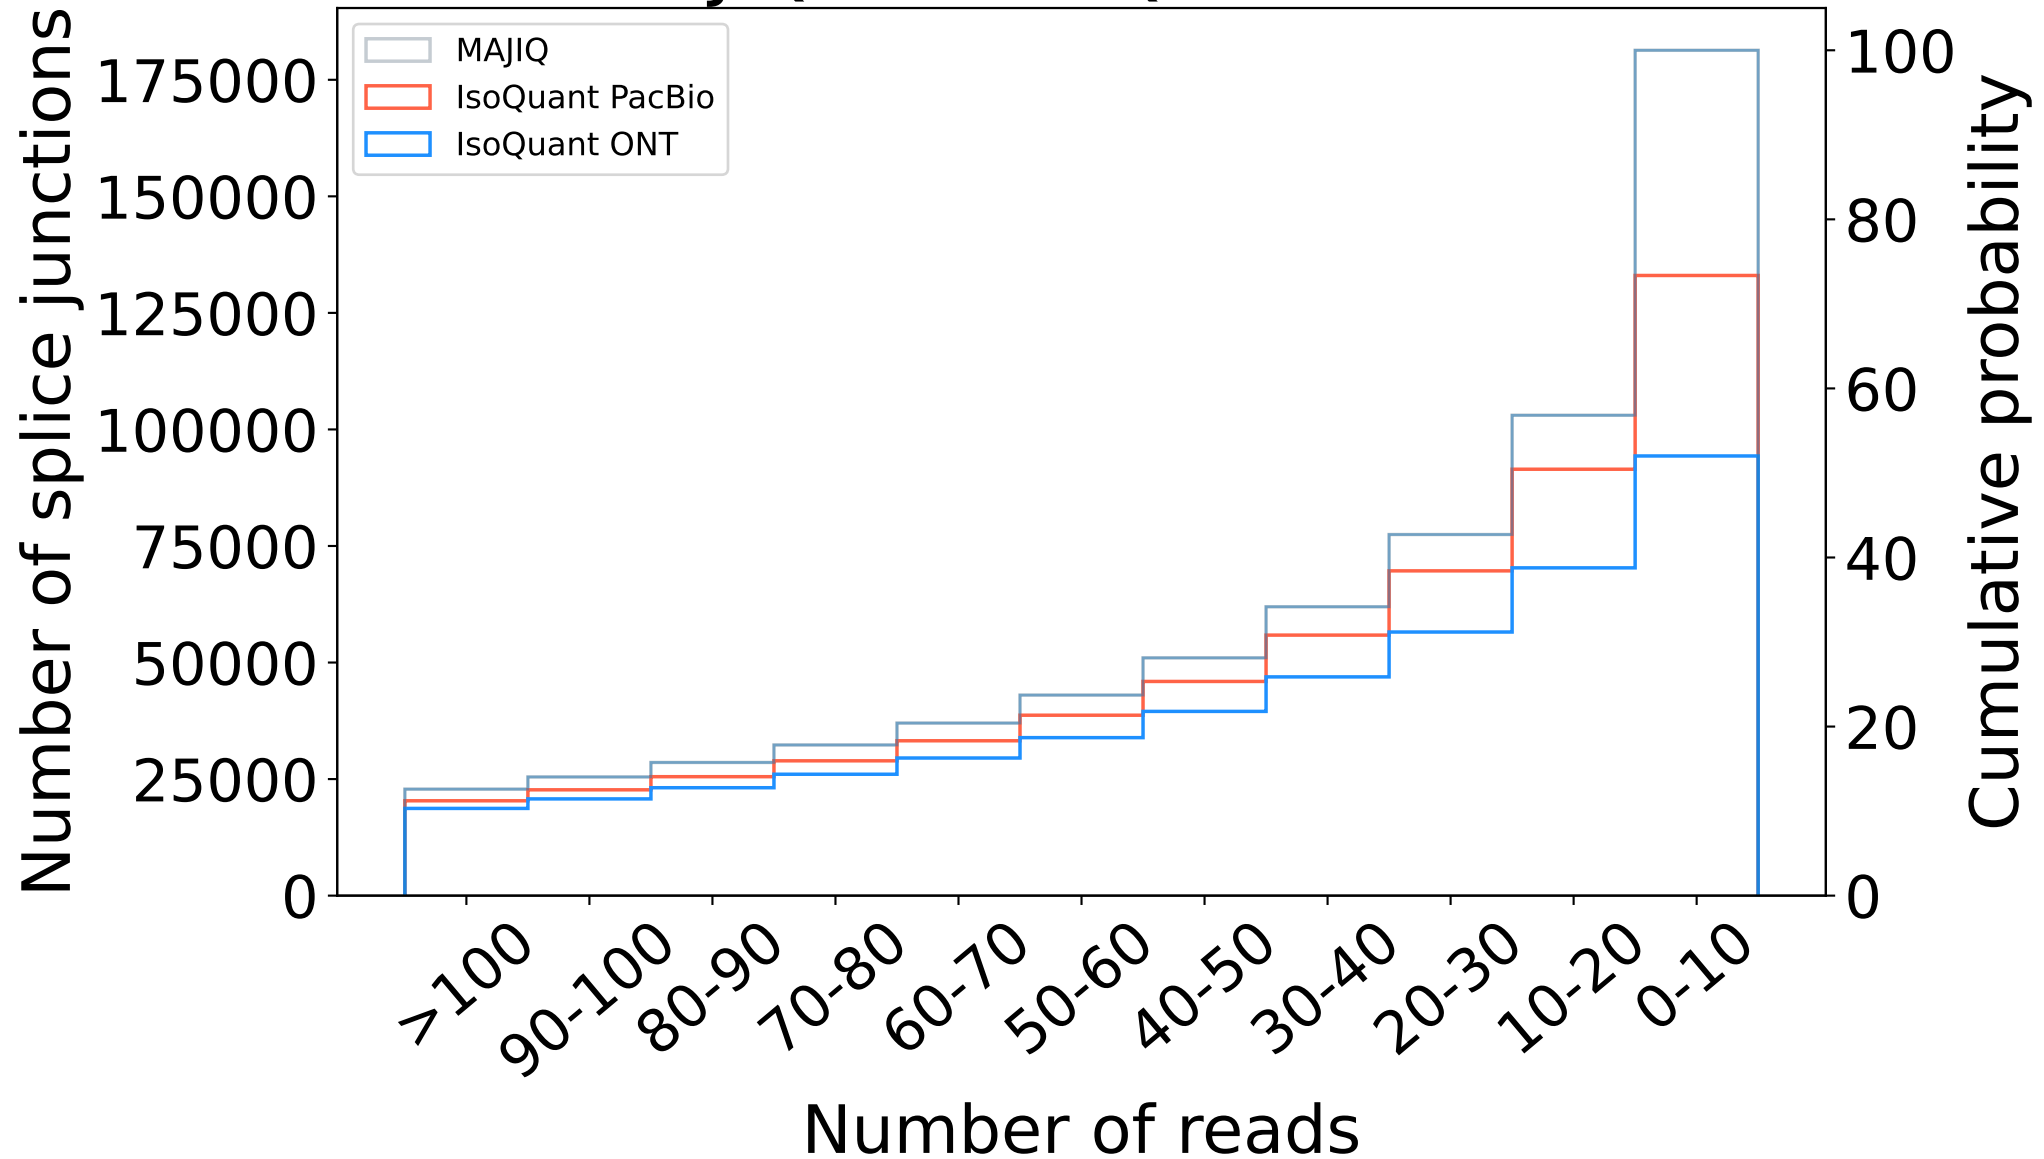

Supplement: Supplemental_code.zip [file Fig_4A_isq_read2.pdf › Supplemental_code/figures/Fig_4/Fig_4A_isq_read2.pdf]

# IsoQuant LSV non-quantifiability

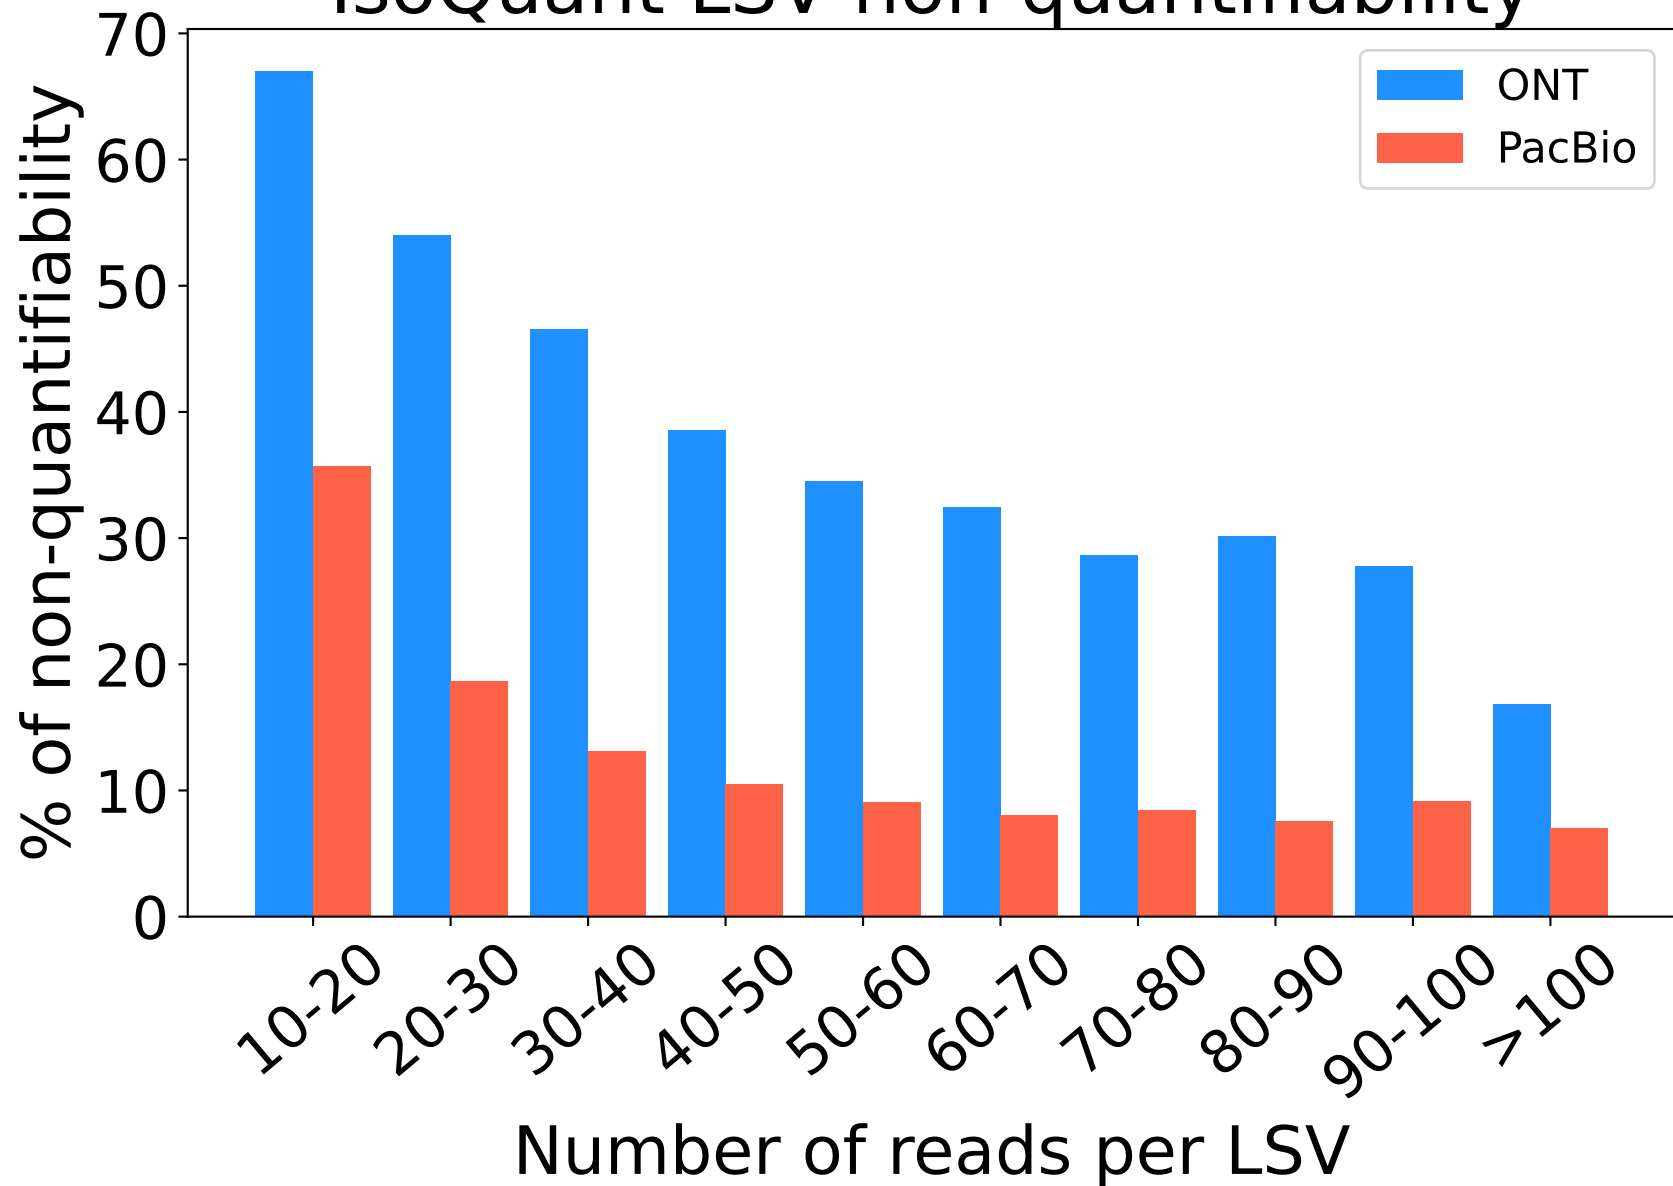

Supplement: Supplemental_code.zip [file Fig_4B_isq_lsv.pdf › Supplemental_code/figures/Fig_4/Fig_4B_isq_lsv.pdf]

# IsoQuant LSV non-quantifiability from 3' end

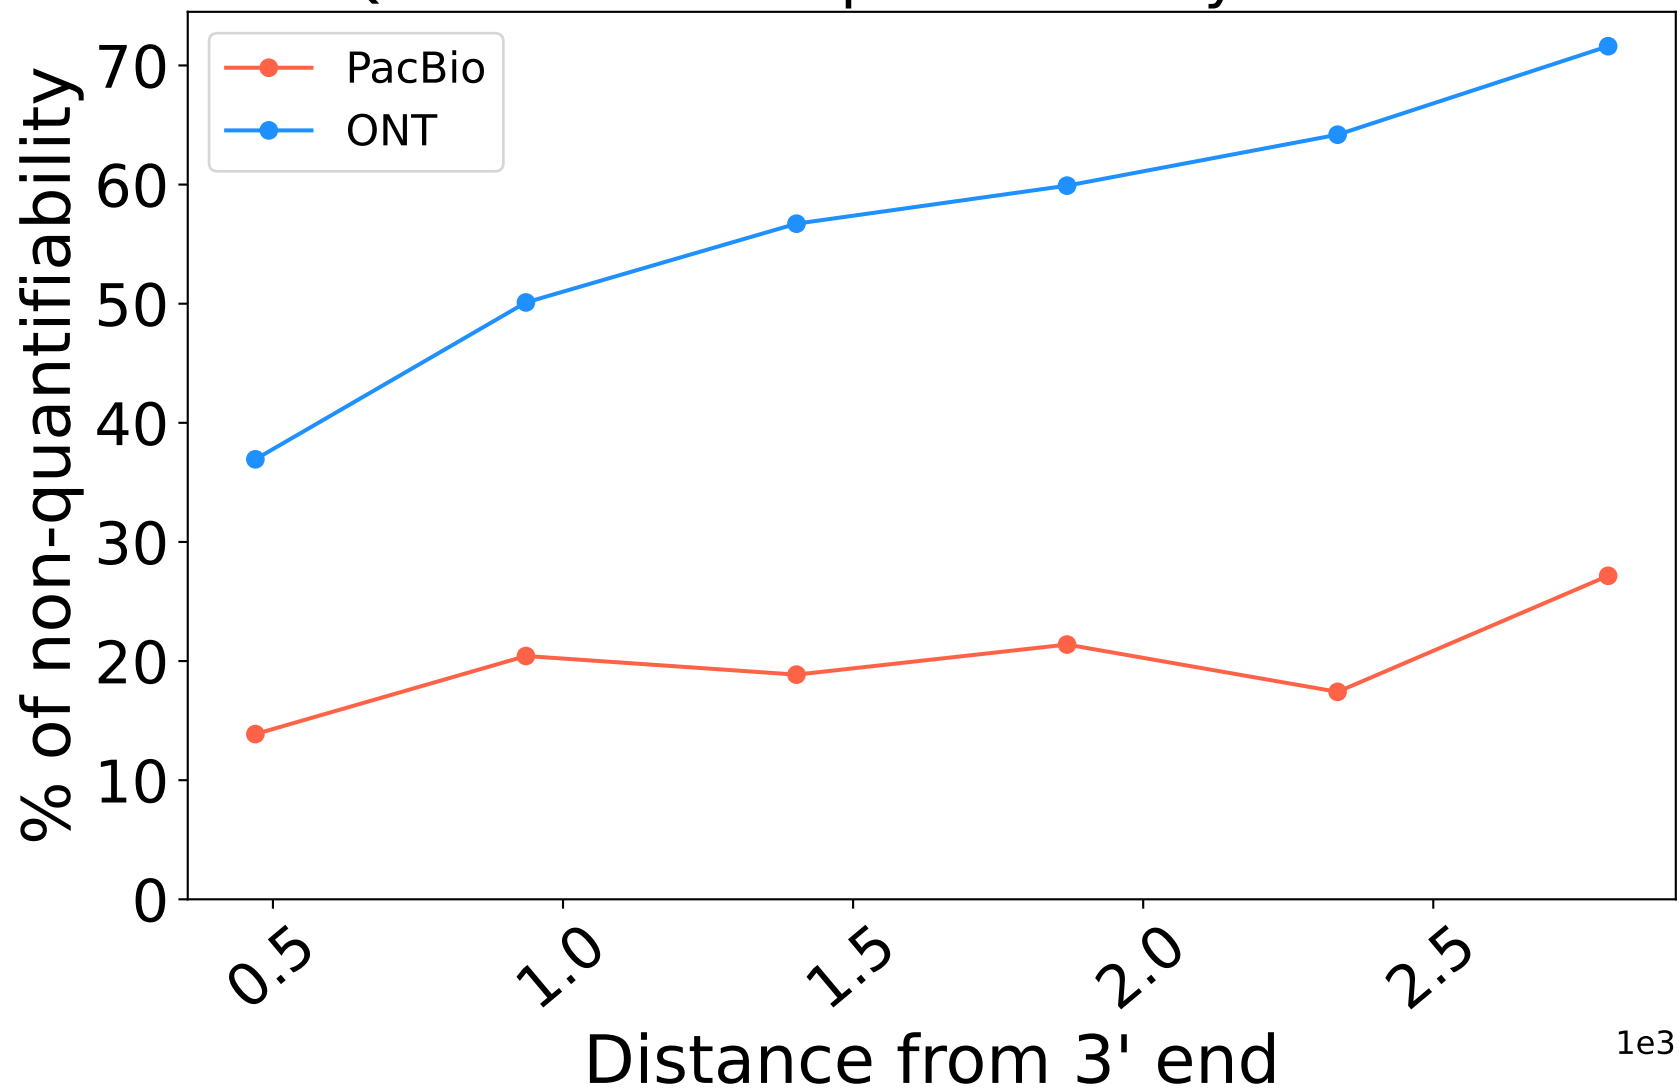

Supplement: Supplemental_code.zip [file Fig_4C_isq_distace.pdf › Supplemental_code/figures/Fig_4/Fig_4C_isq_distace.pdf]

Short and long-read length distribution

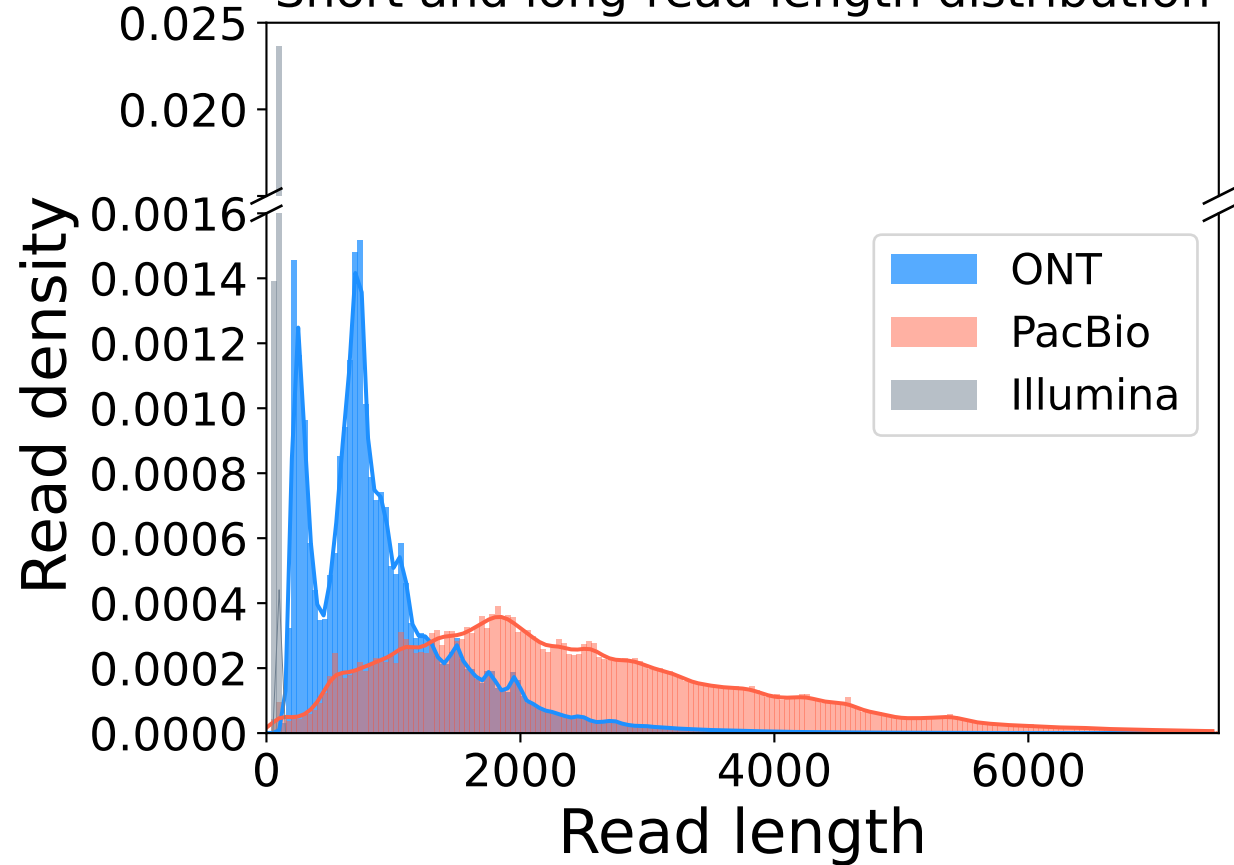

Supplement: Supplemental_code.zip [file Fig_4C_sr_pcb_ont_distribution.pdf › Supplemental_code/figures/Fig_4/Fig_4C_sr_pcb_ont_distribution.pdf]

# GC content between short and long-read

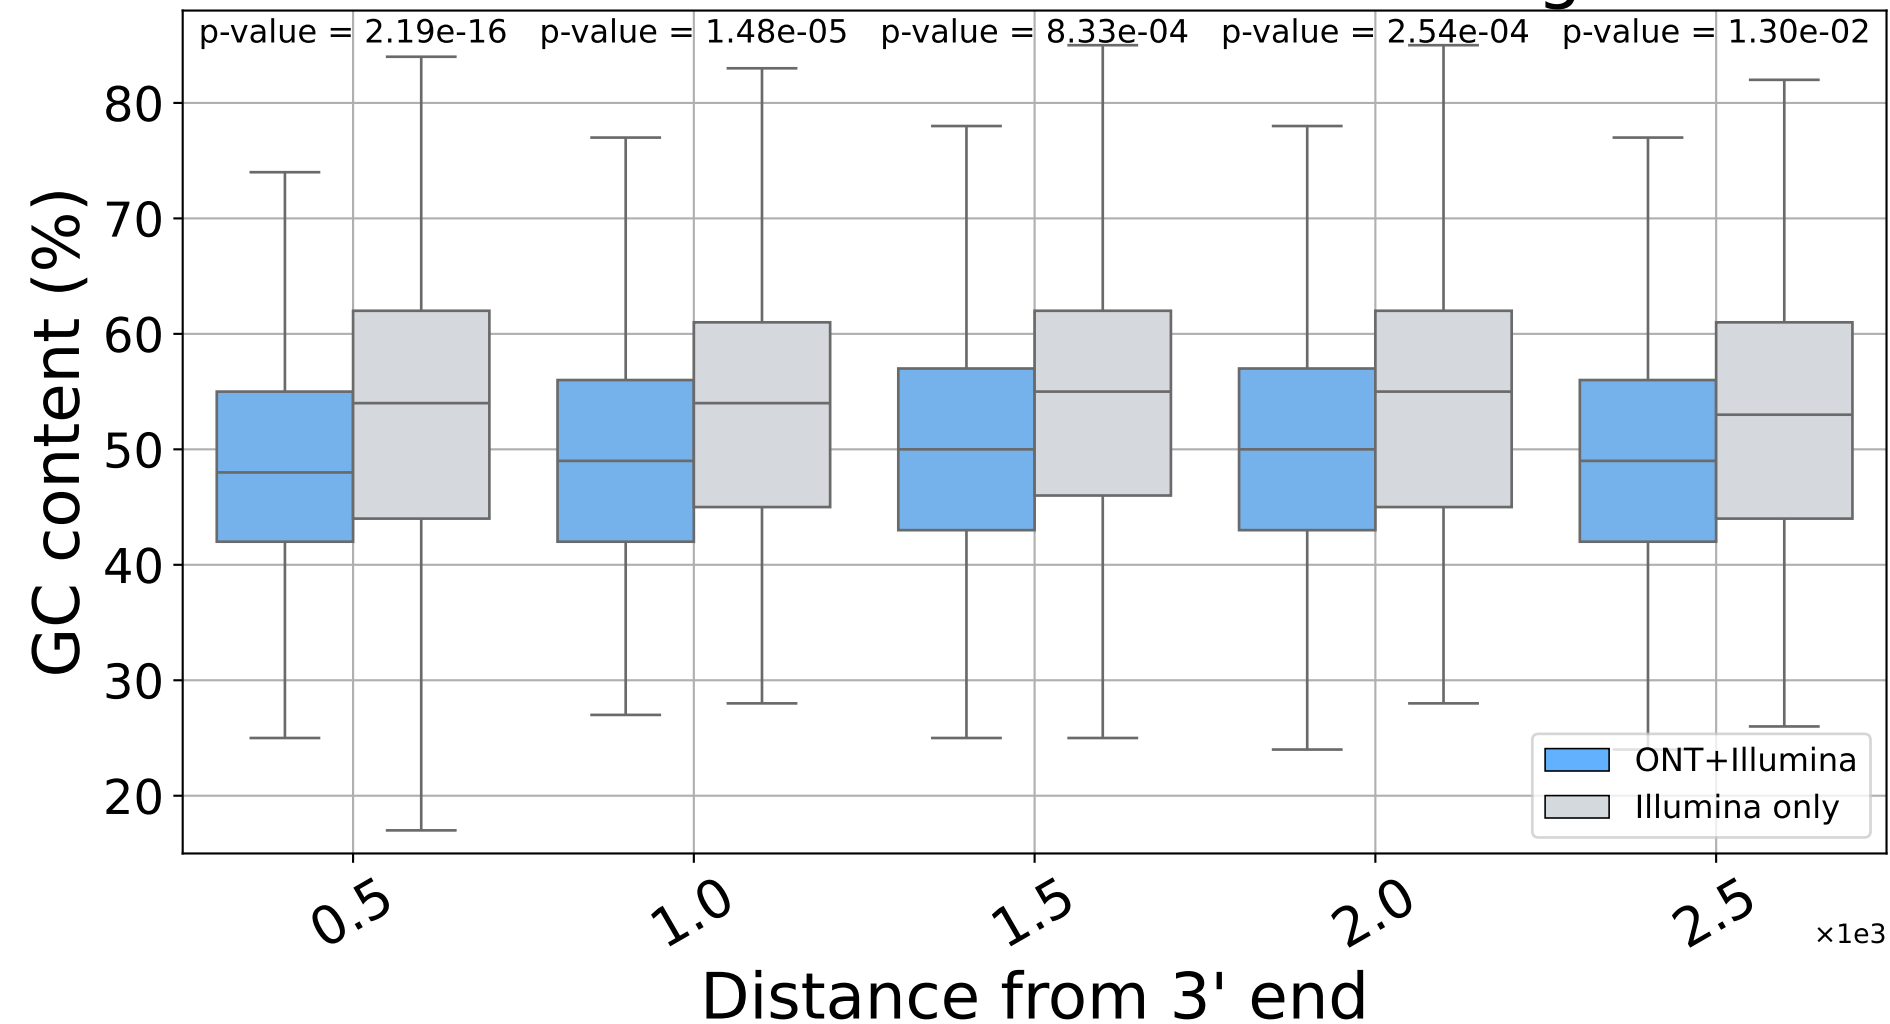

Supplement: Supplemental_code.zip [file Fig_4D_GC_ont.pdf › Supplemental_code/figures/Fig_4/Fig_4D_GC_ont.pdf]

# GC content between short and long-read

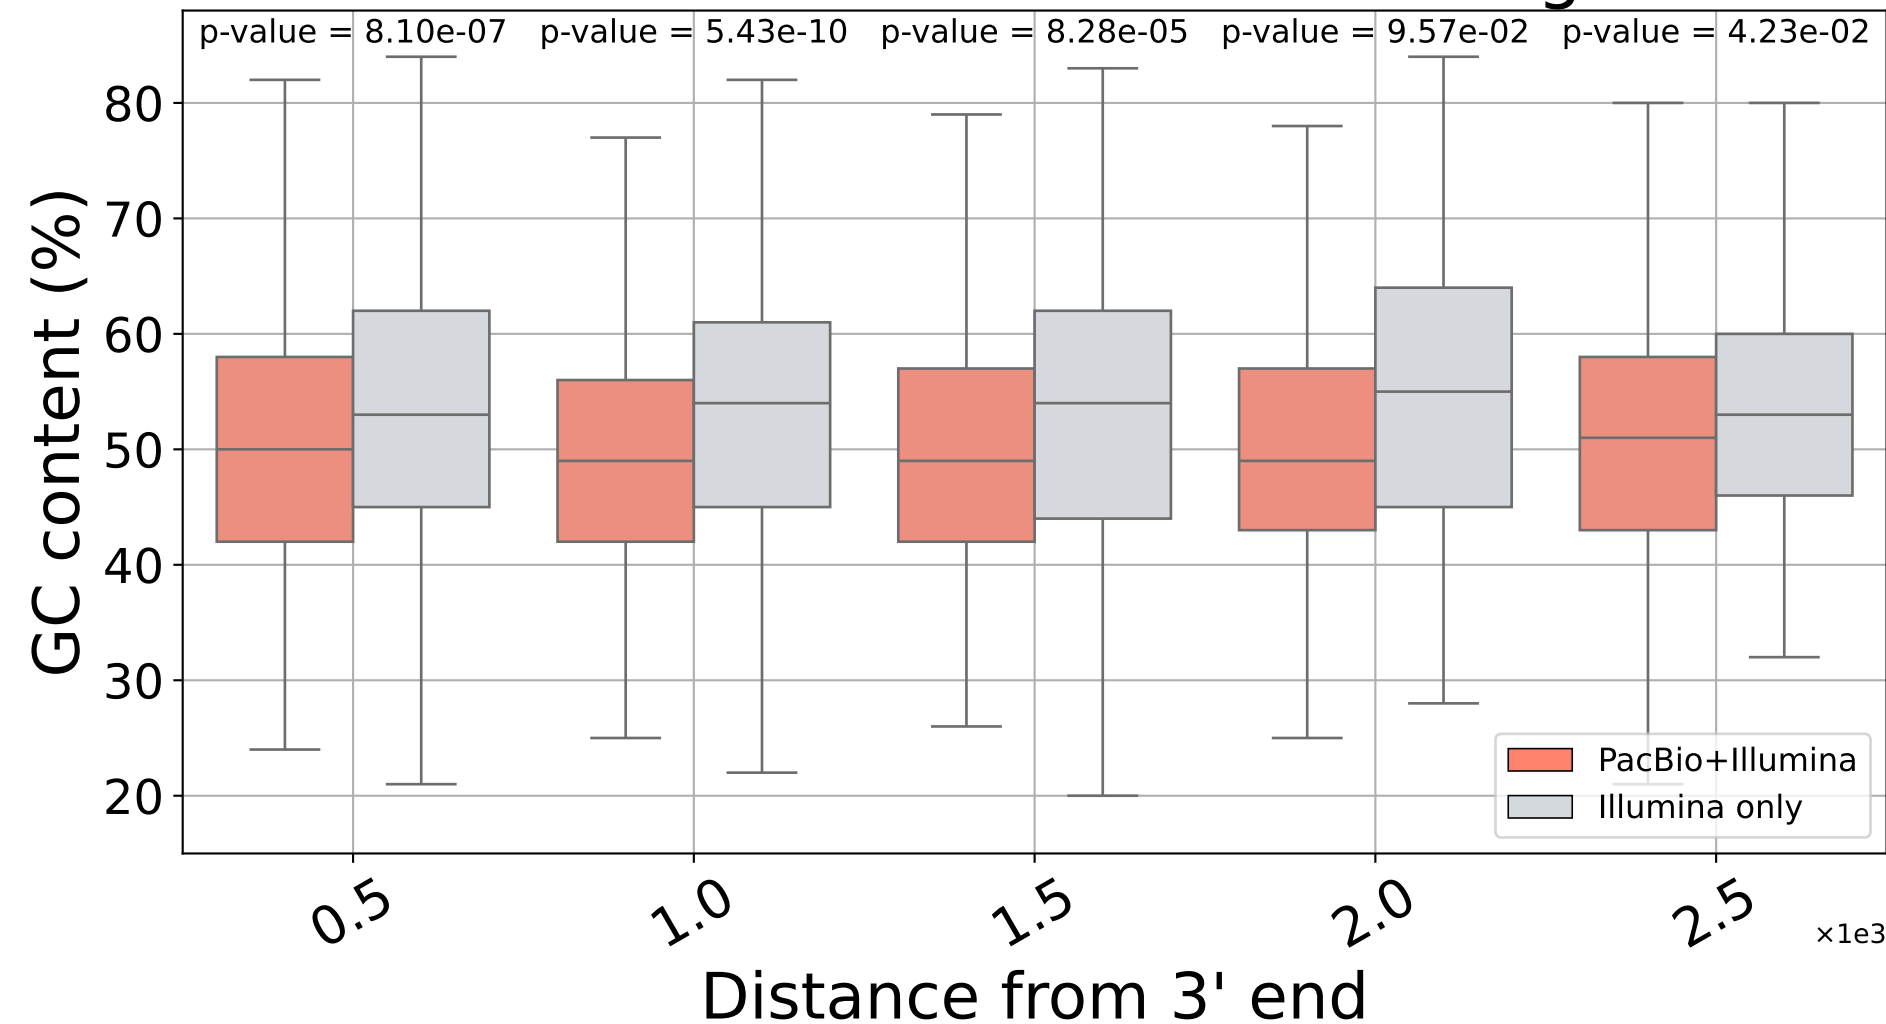

Supplement: Supplemental_code.zip [file Fig_4D_GC_pacbio.pdf › Supplemental_code/figures/Fig_4/Fig_4D_GC_pacbio.pdf]

# Minimum free energy between short and long-read

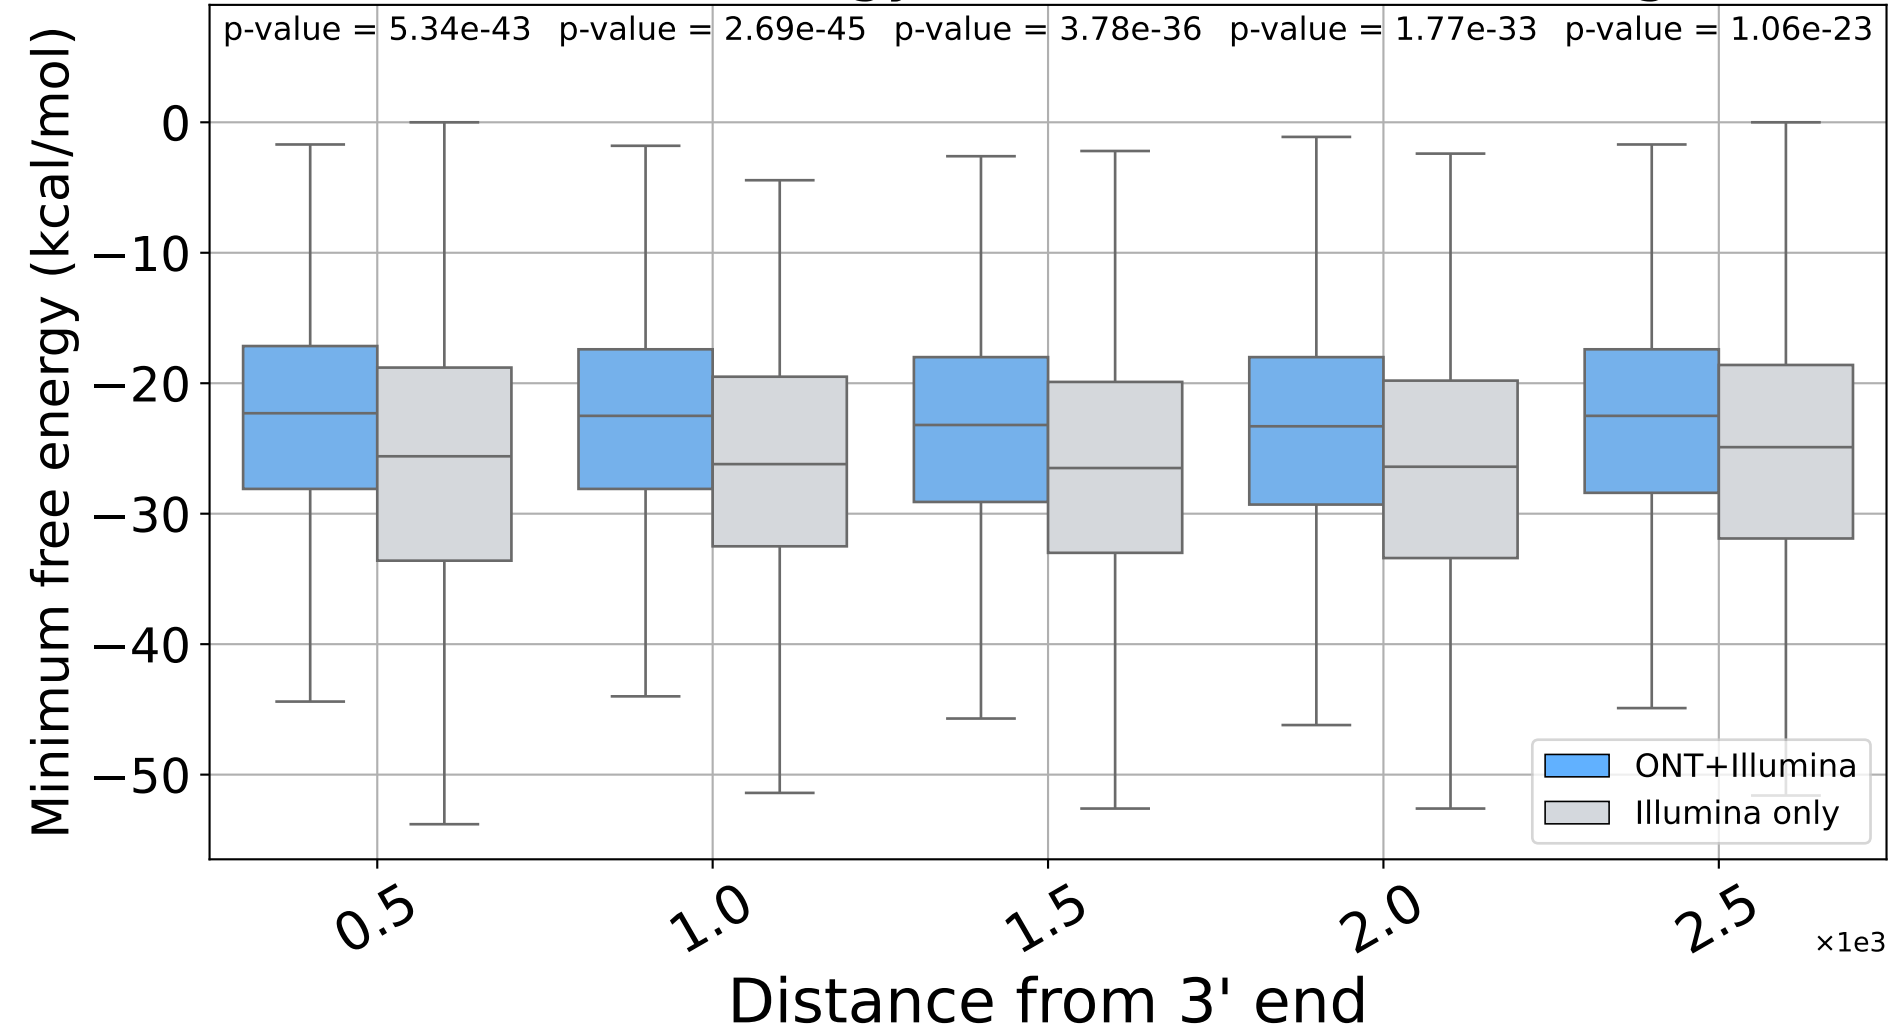

Supplement: Supplemental_code.zip [file Fig_4D_mfe_ont.pdf › Supplemental_code/figures/Fig_4/Fig_4D_mfe_ont.pdf]

# Minimum free energy between short and long-read

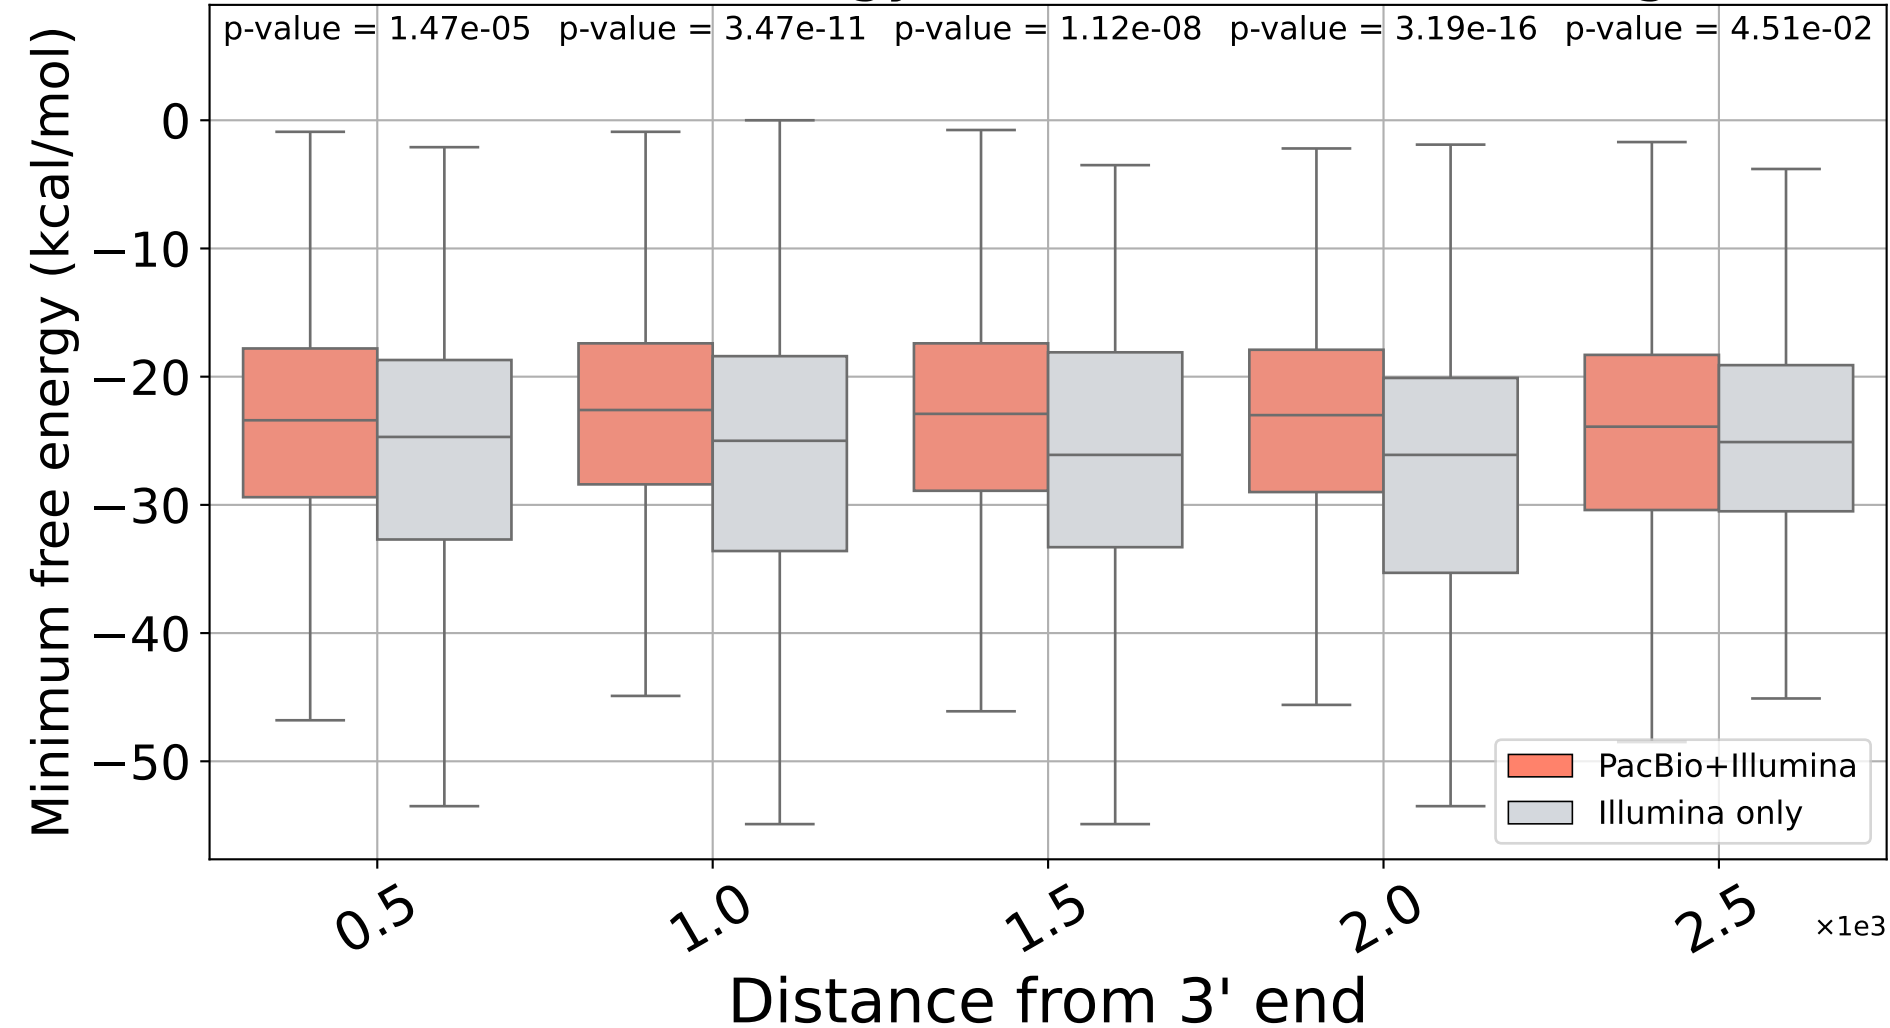

Supplement: Supplemental_code.zip [file Fig_4D_mfe_pacbio.pdf › Supplemental_code/figures/Fig_4/Fig_4D_mfe_pacbio.pdf]

# IsoQuant and MAJIQ intron retention

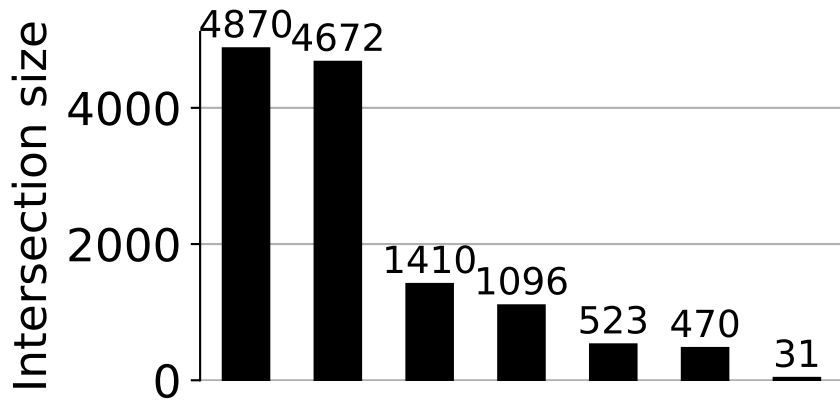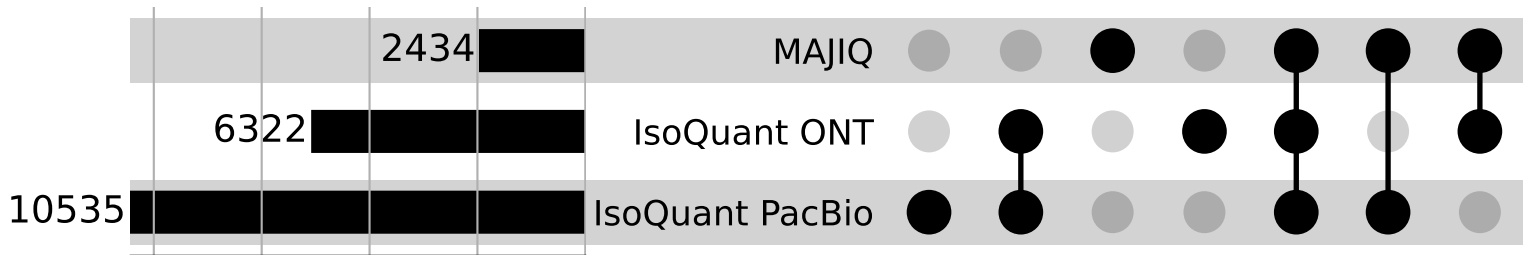

Supplement: Supplemental_code.zip [file Fig_5A_upset_isq_ir.pdf › Supplemental_code/figures/Fig_5/Fig_5A_upset_isq_ir.pdf]

# IsoQuant and MAJIQ intron retention length comparison

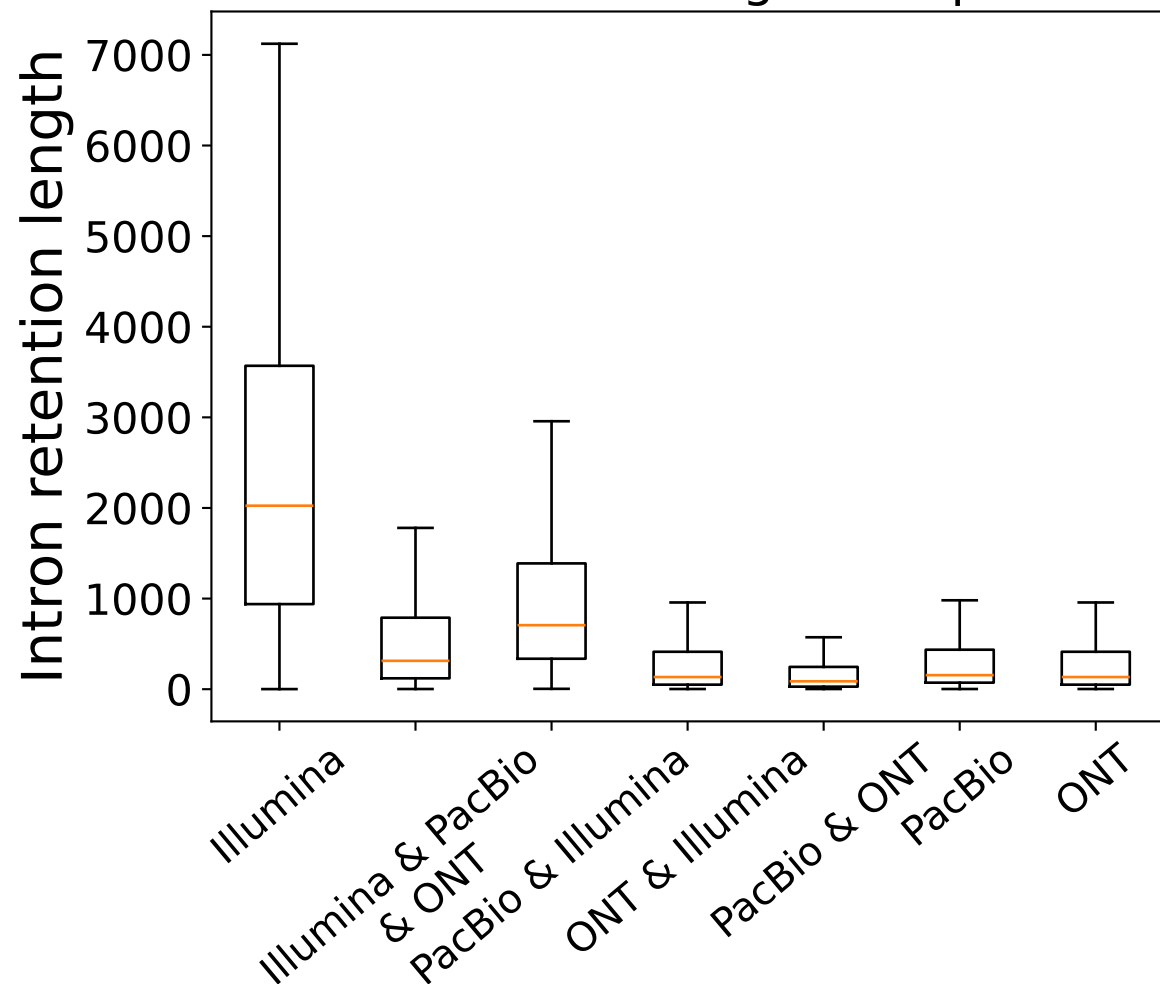

Supplement: Supplemental_code.zip [file Fig_5B_boxplot_isq.pdf › Supplemental_code/figures/Fig_5/Fig_5B_boxplot_isq.pdf]

# IR: MAJIQ and IsoQuant PSI ( $\Psi$ )

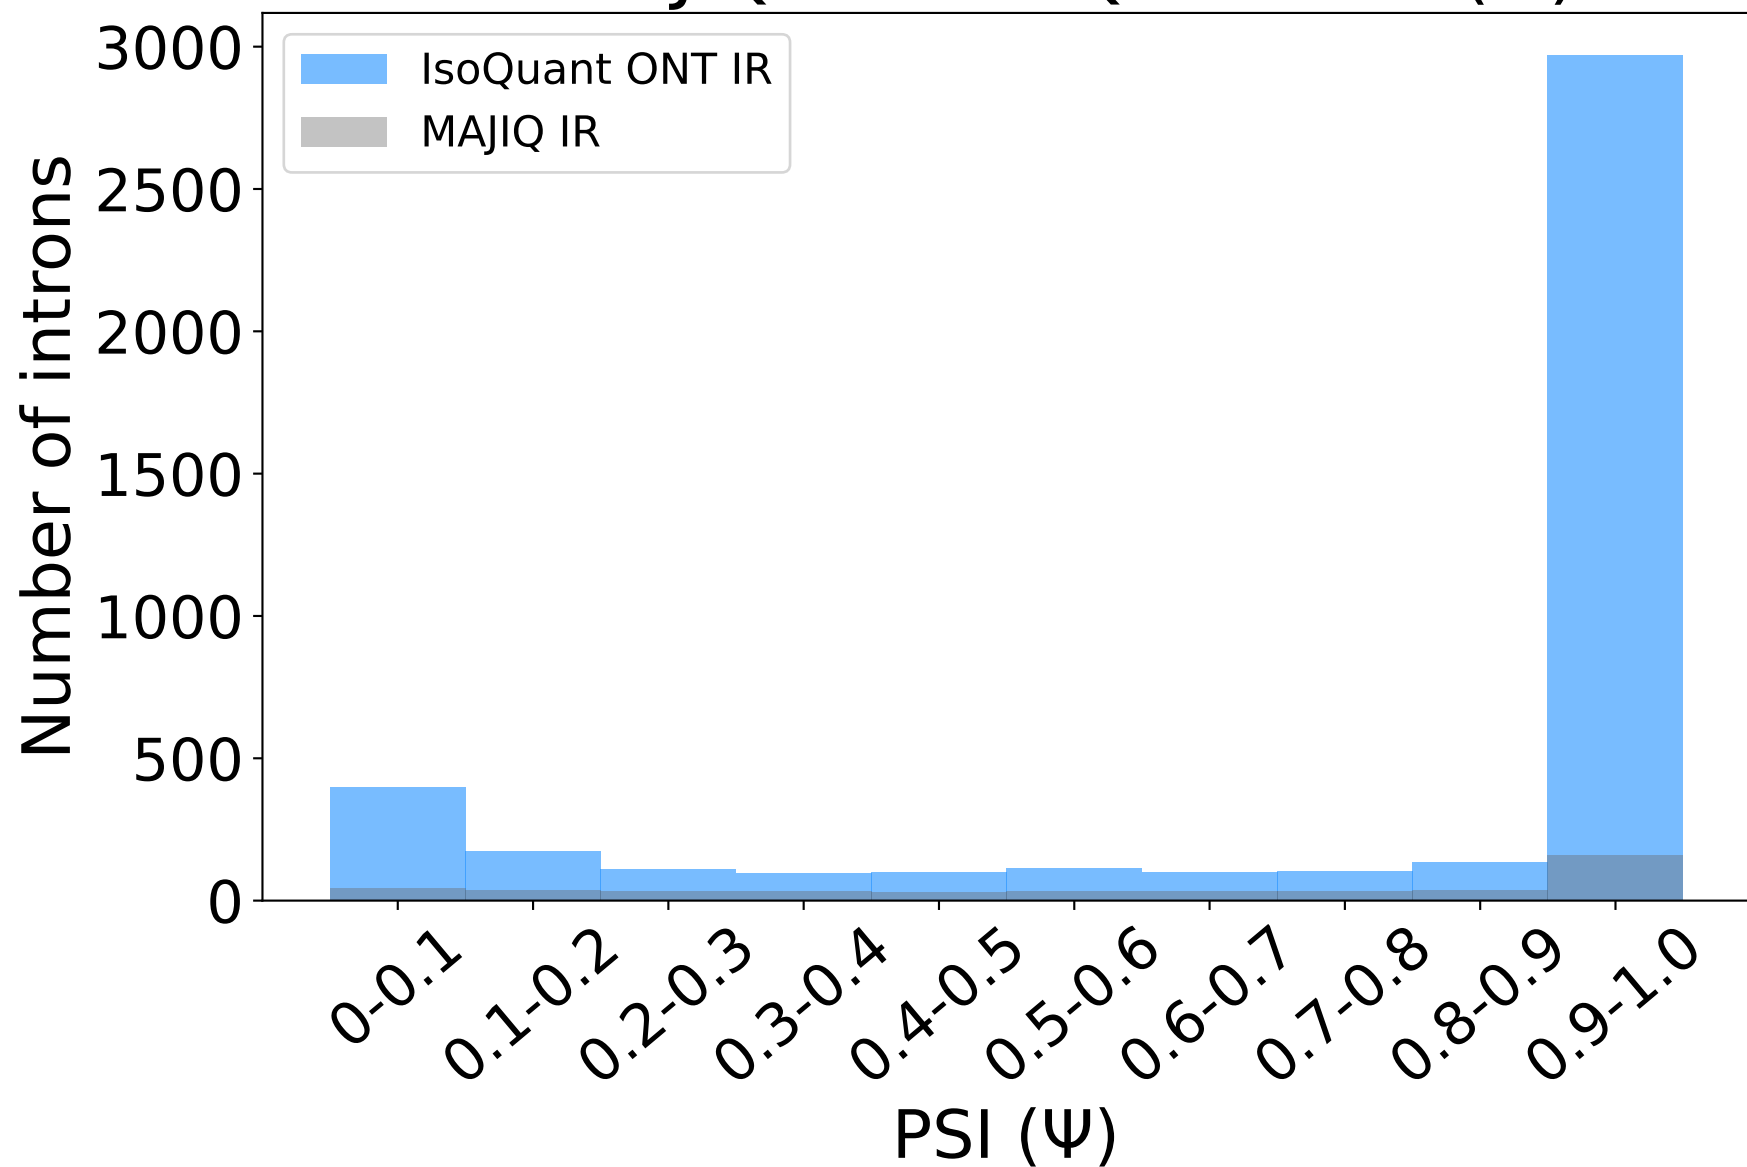

Supplement: Supplemental_code.zip [file Fig_5C_isq_ont_ir_psi.pdf › Supplemental_code/figures/Fig_5/Fig_5C_isq_ont_ir_psi.pdf]

# IR: MAJIQ and IsoQuant reads

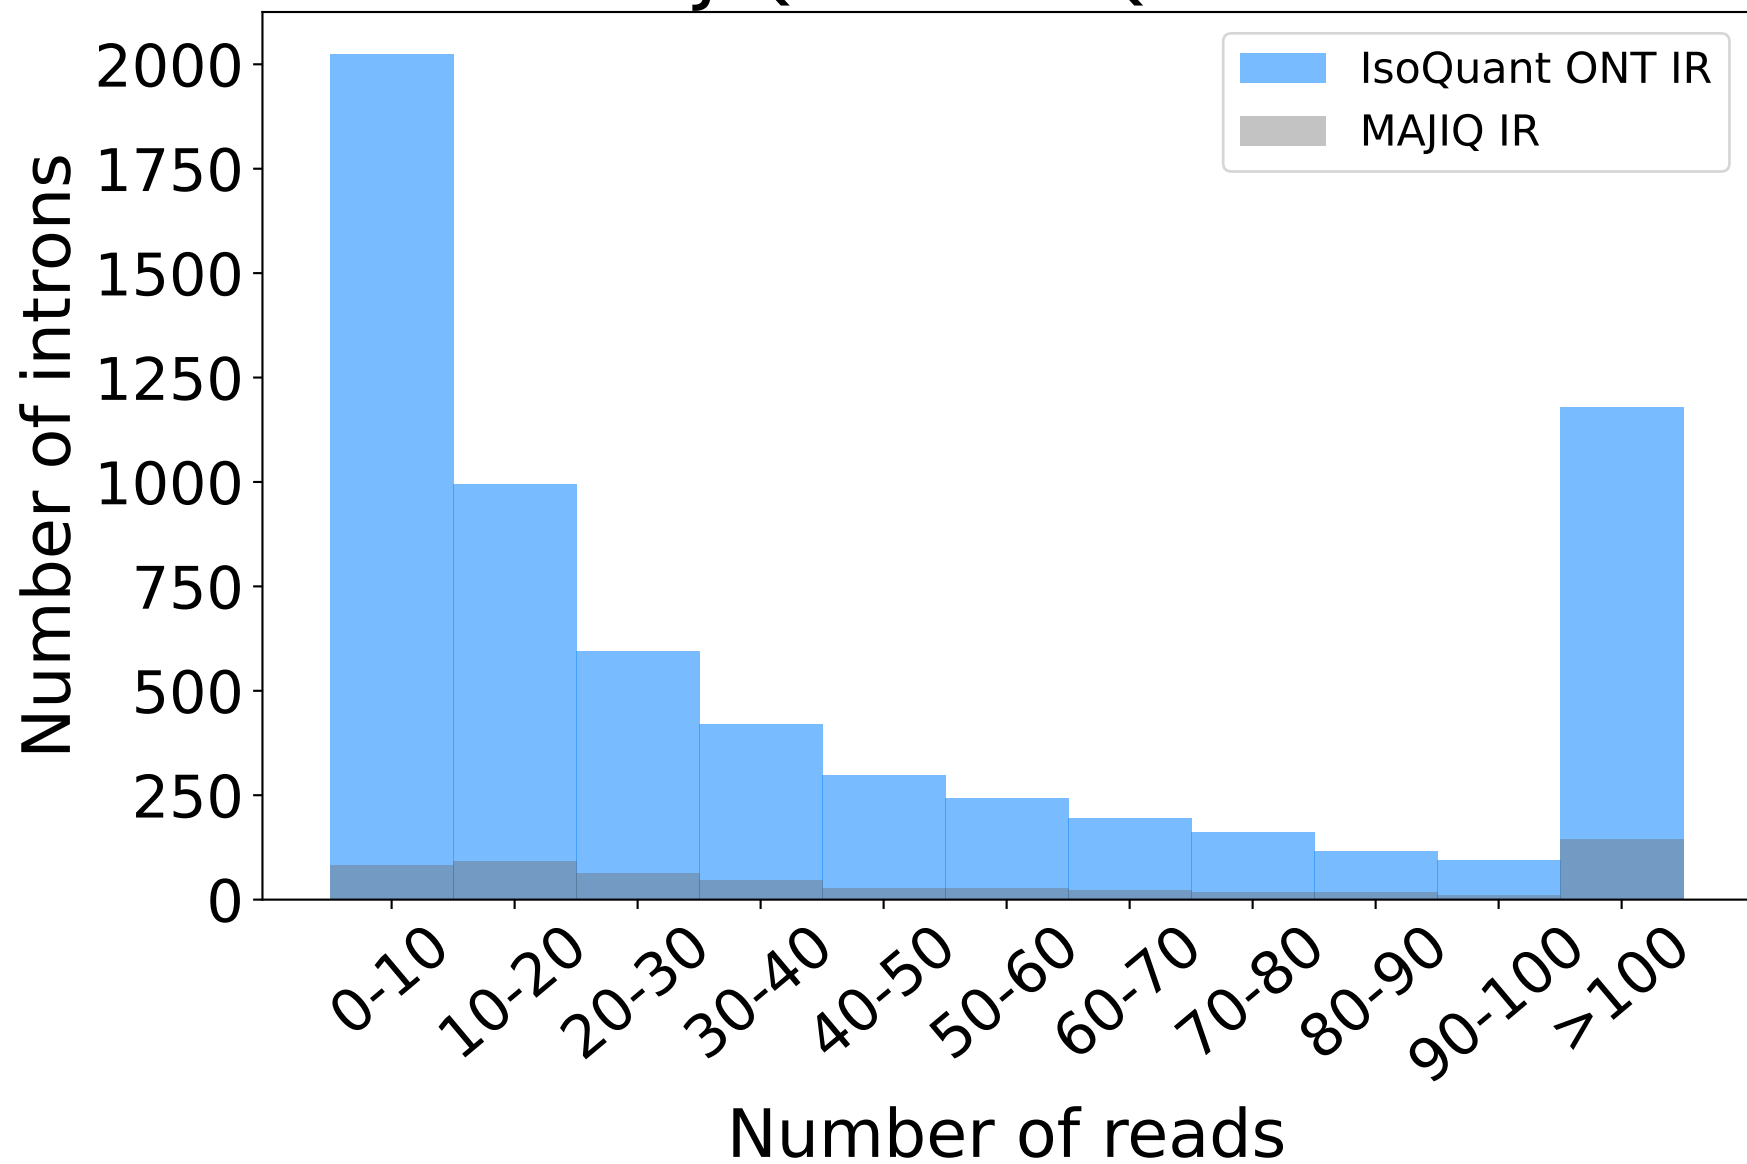

Supplement: Supplemental_code.zip [file Fig_5C_isq_ont_ir_read.pdf › Supplemental_code/figures/Fig_5/Fig_5C_isq_ont_ir_read.pdf]

# IR: MAJIQ and IsoQuant PSI ( $\Psi$ )

Number of introns

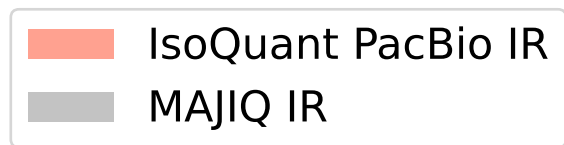

0-0.1  
0.1-0.2  
0.2-0.3  
0.3-0.4  
0.4-0.5  
0.5-0.6  
0.6-0.7  
0.7-0.8  
0.8-0.9  
0.9-1.0

PSI ( $\Psi$ )

4000  
3500  
3000  
2500  
2000  
1500  
1000  
500  
0

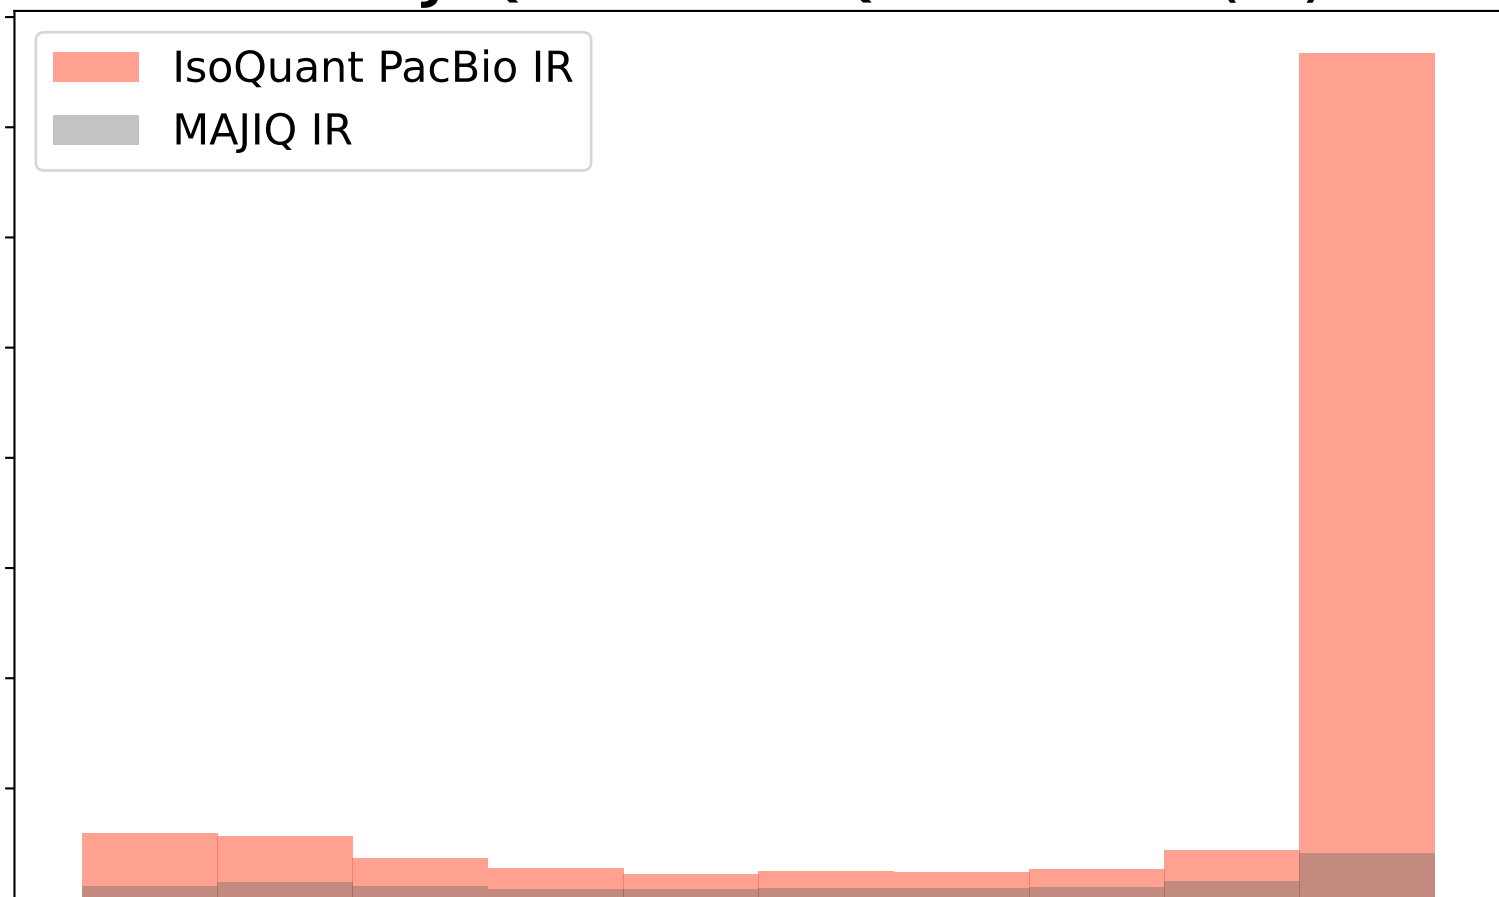

Supplement: Supplemental_code.zip [file Fig_5C_isq_pcb_ir_psi.pdf › Supplemental_code/figures/Fig_5/Fig_5C_isq_pcb_ir_psi.pdf]

# IR: MAJIQ and IsoQuant reads

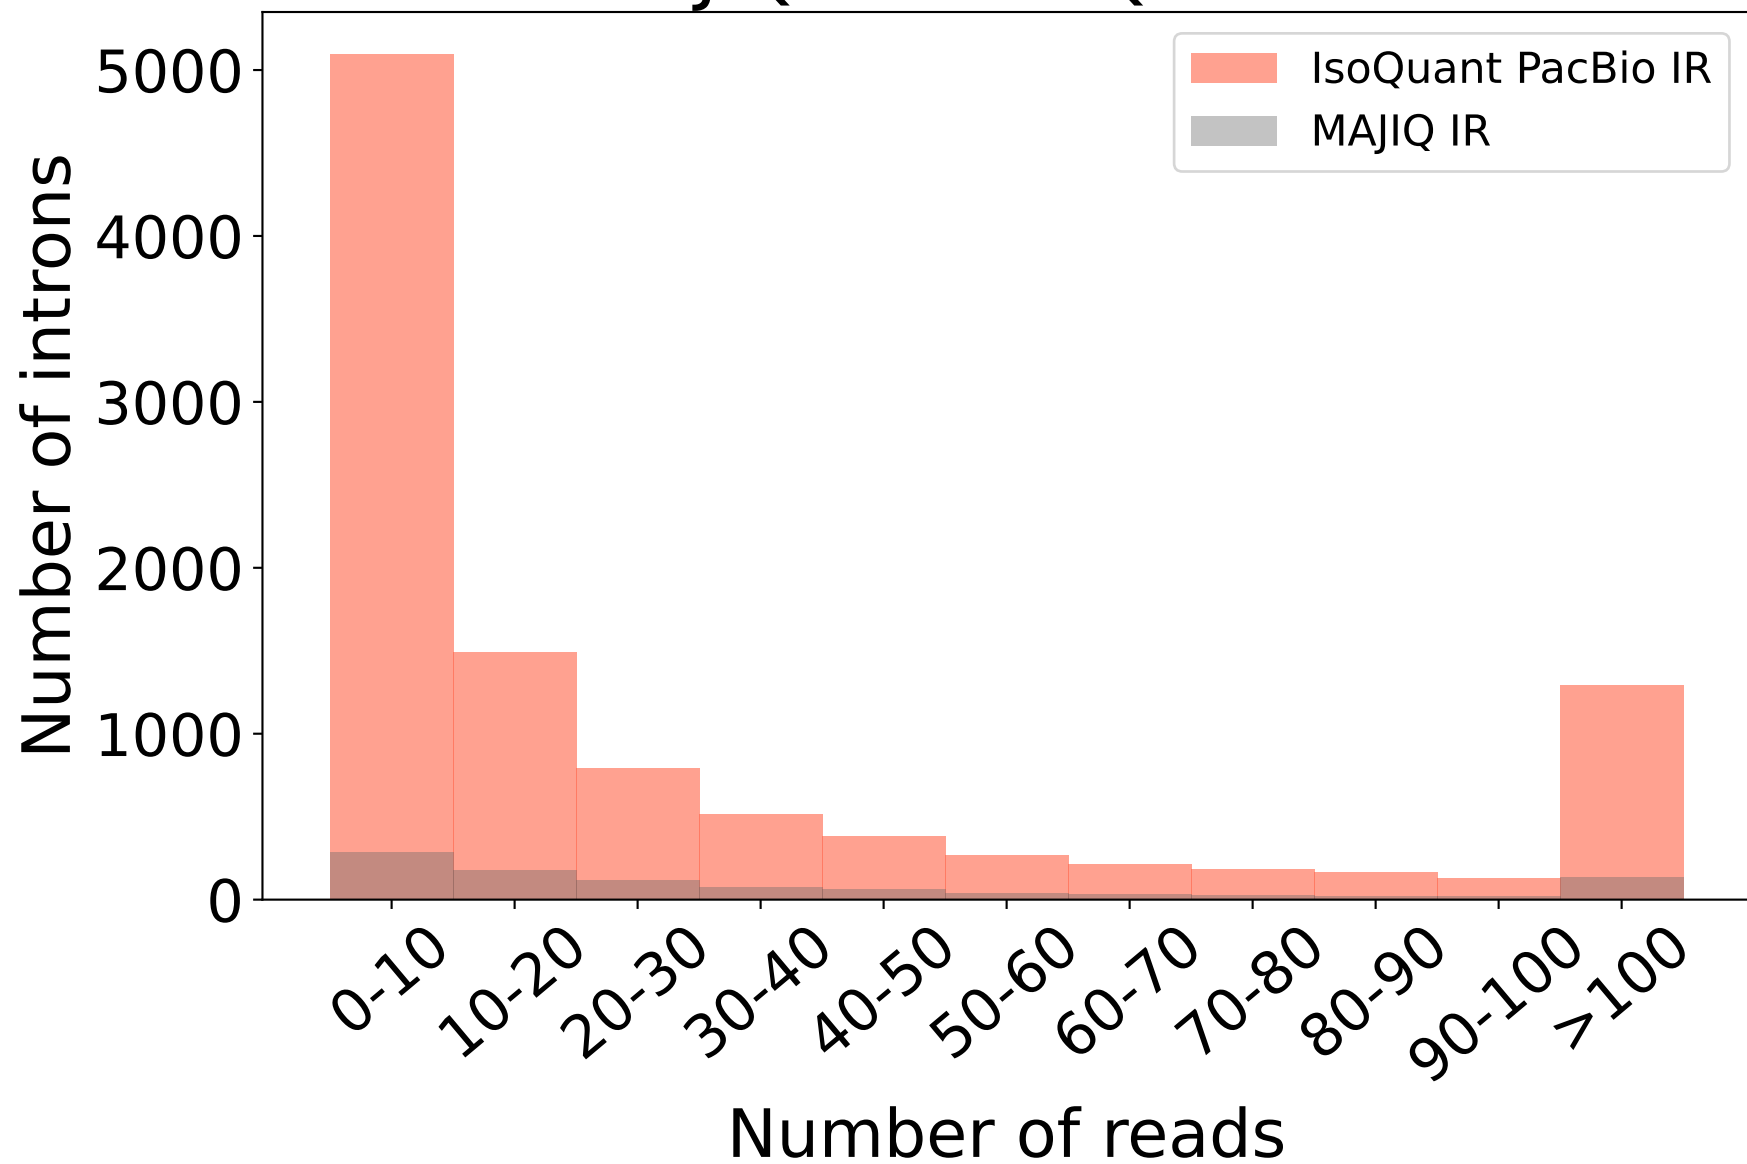

Supplement: Supplemental_code.zip [file Fig_5C_isq_pcb_ir_read.pdf › Supplemental_code/figures/Fig_5/Fig_5C_isq_pcb_ir_read.pdf]

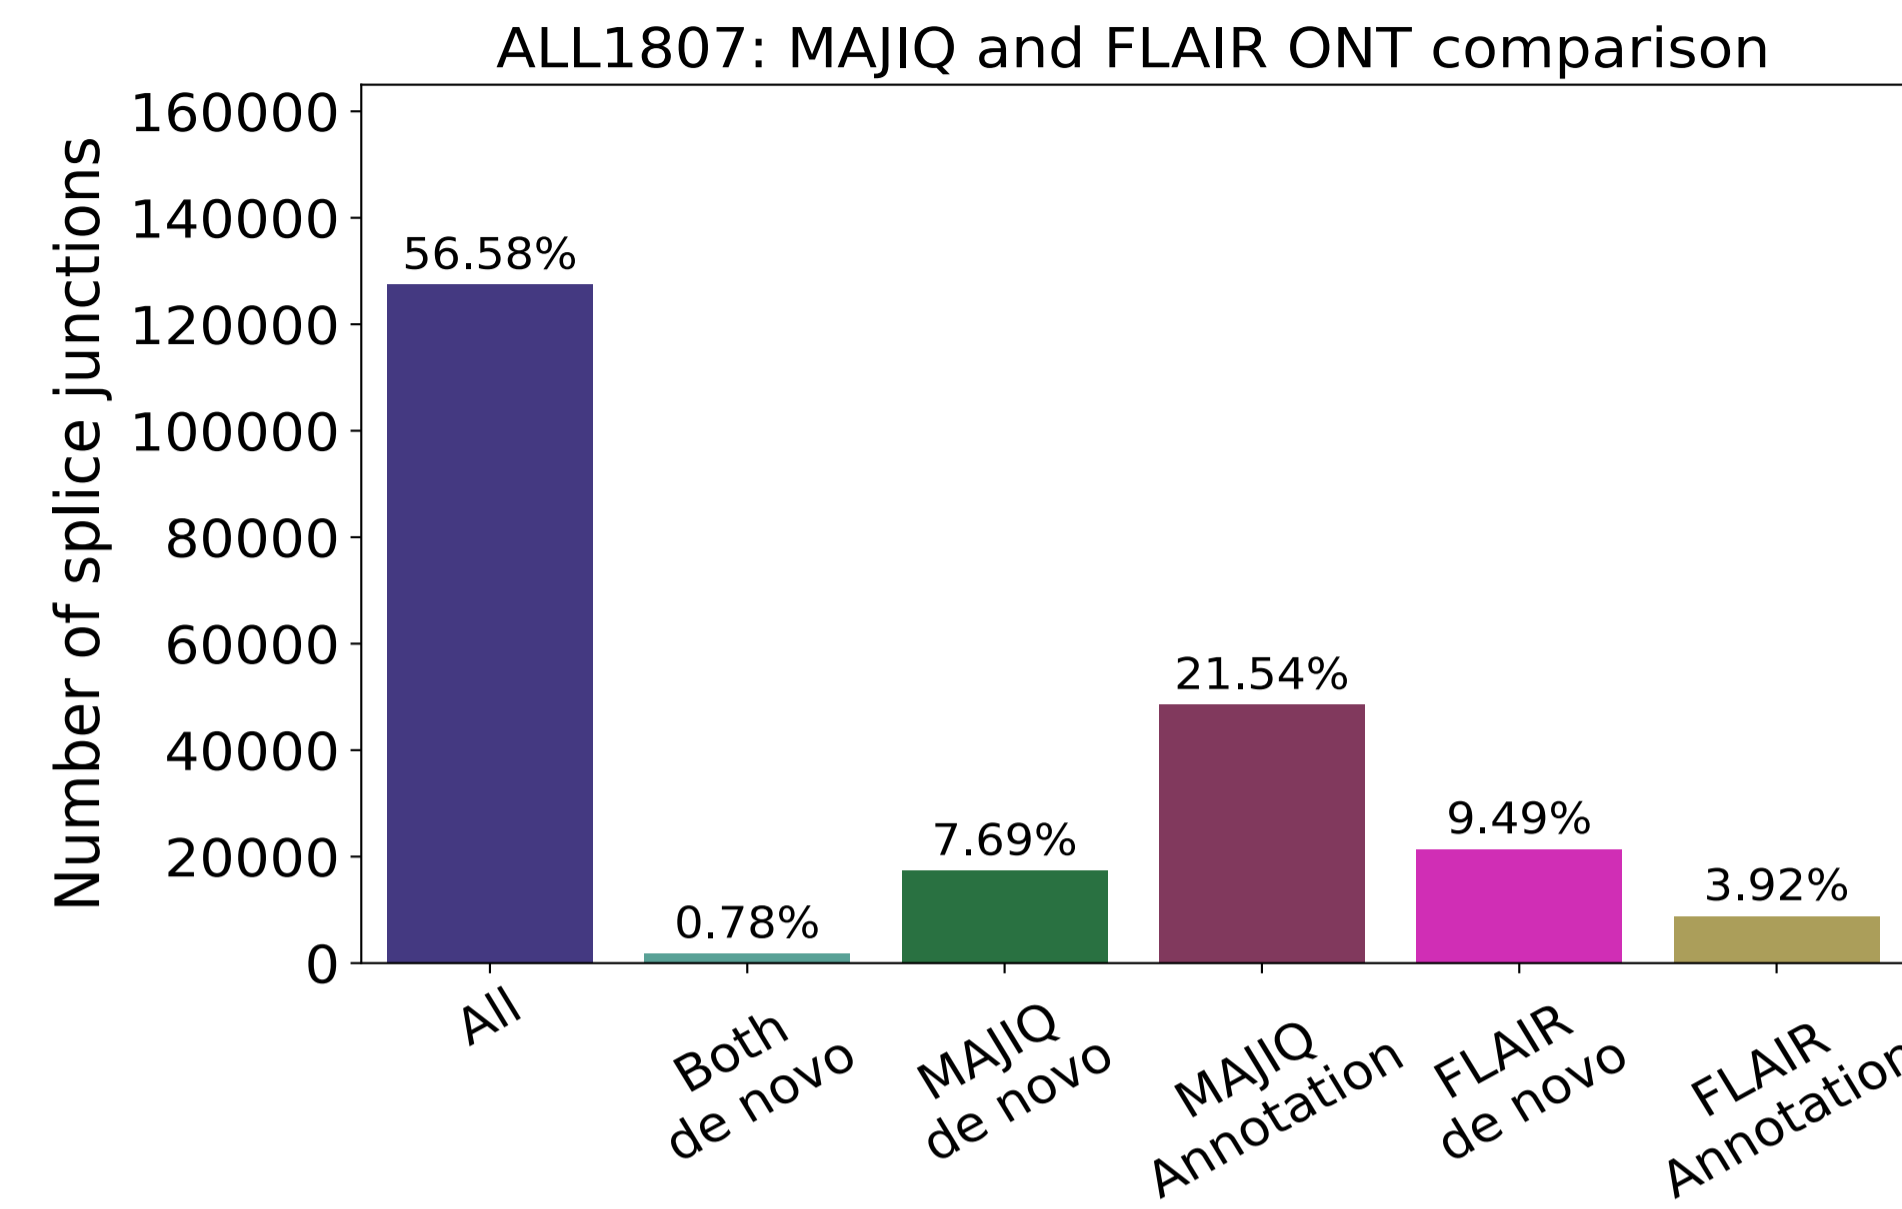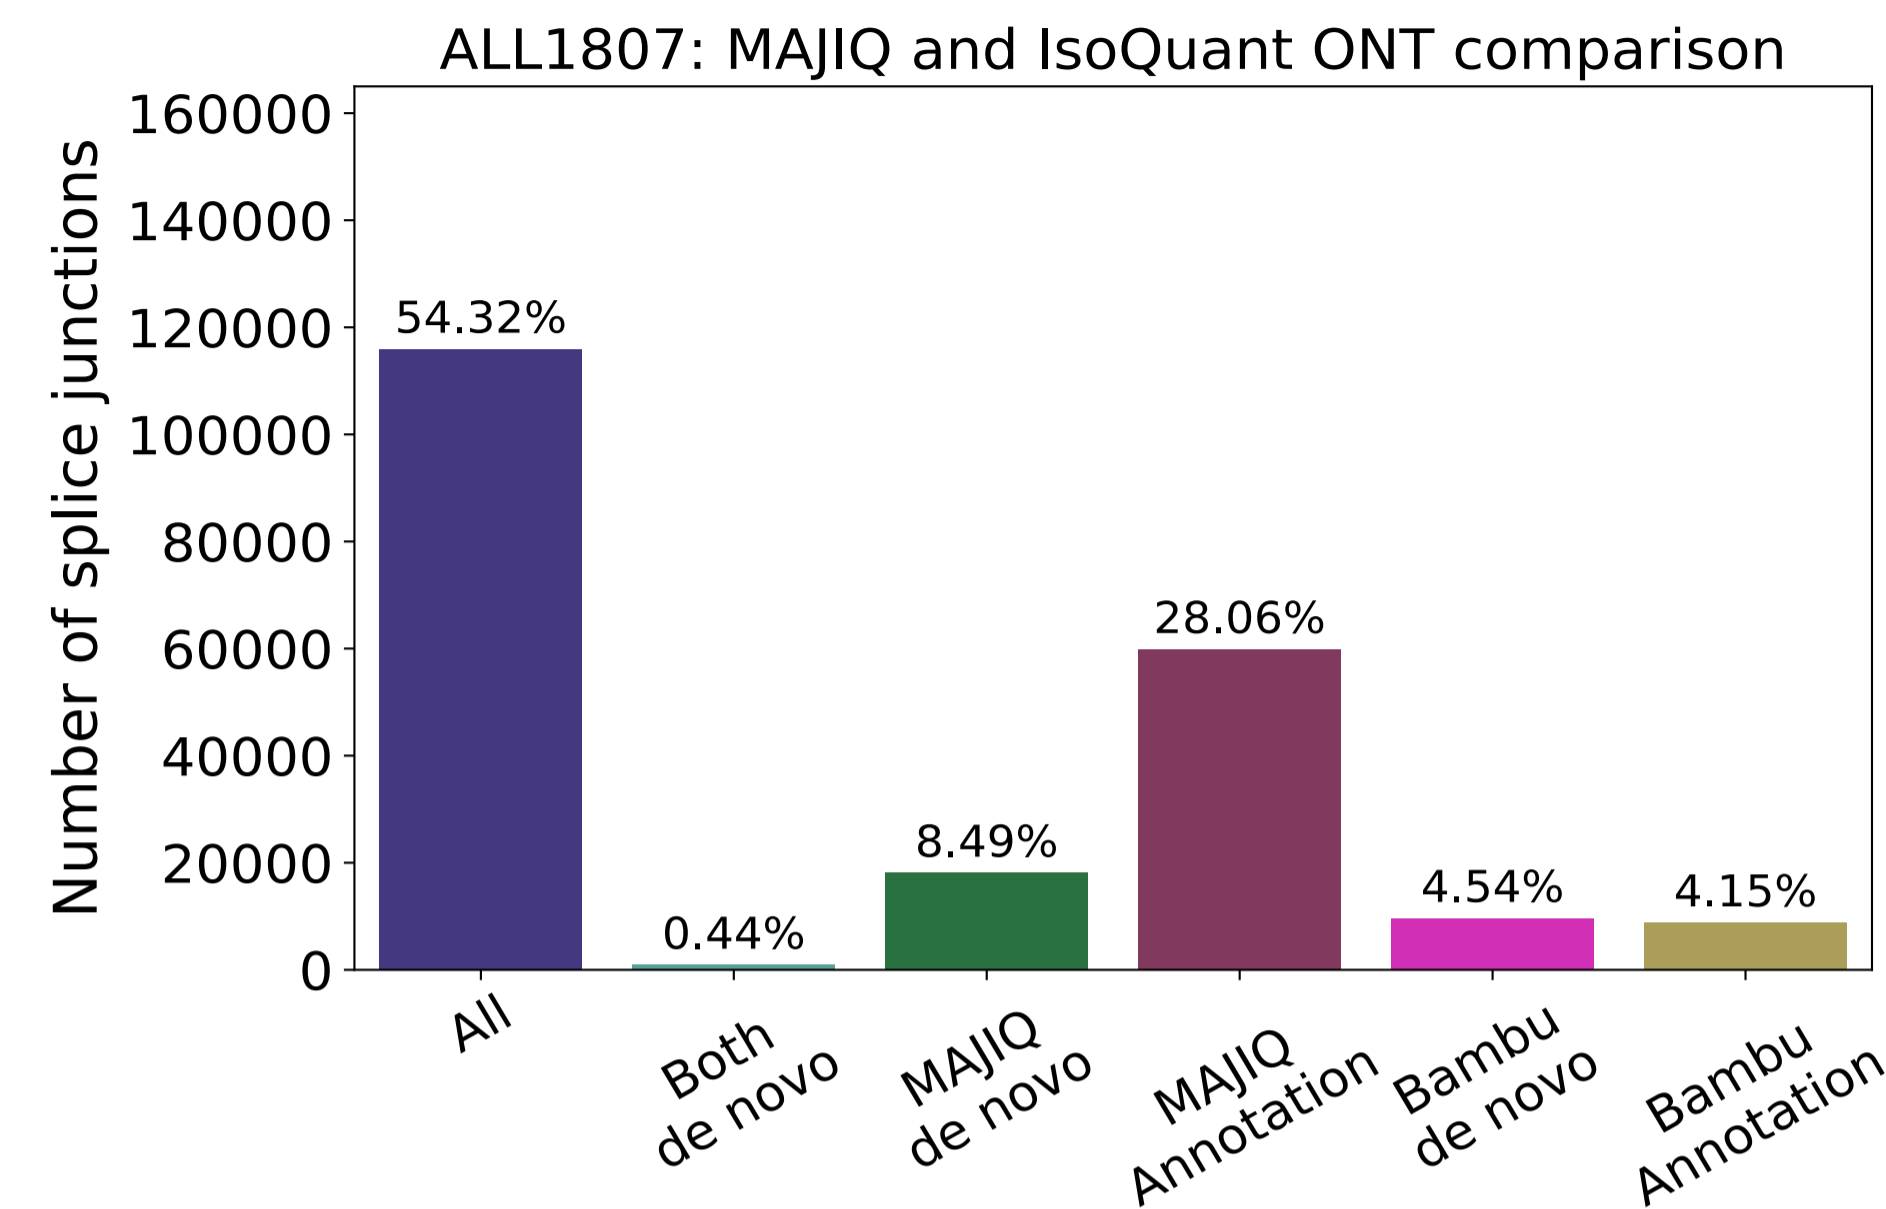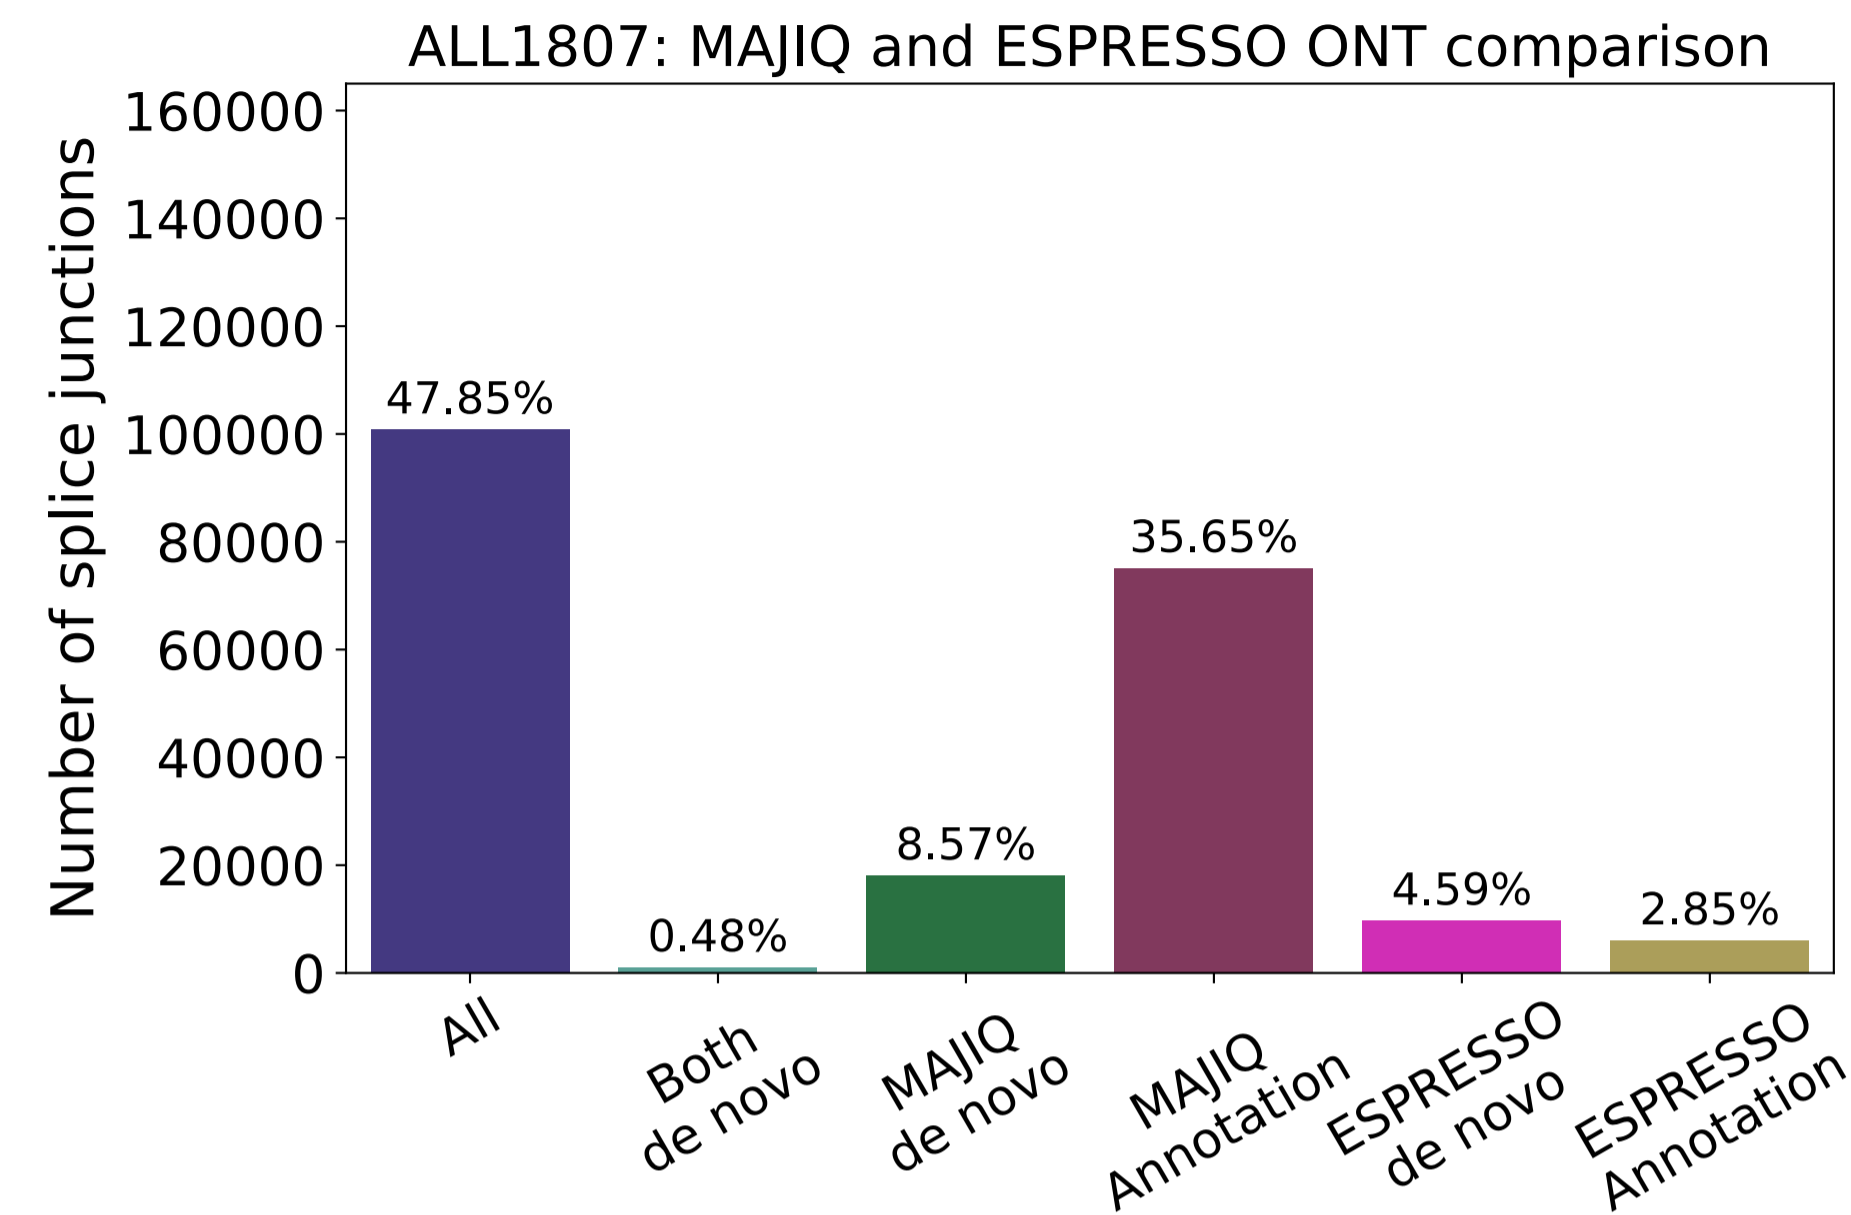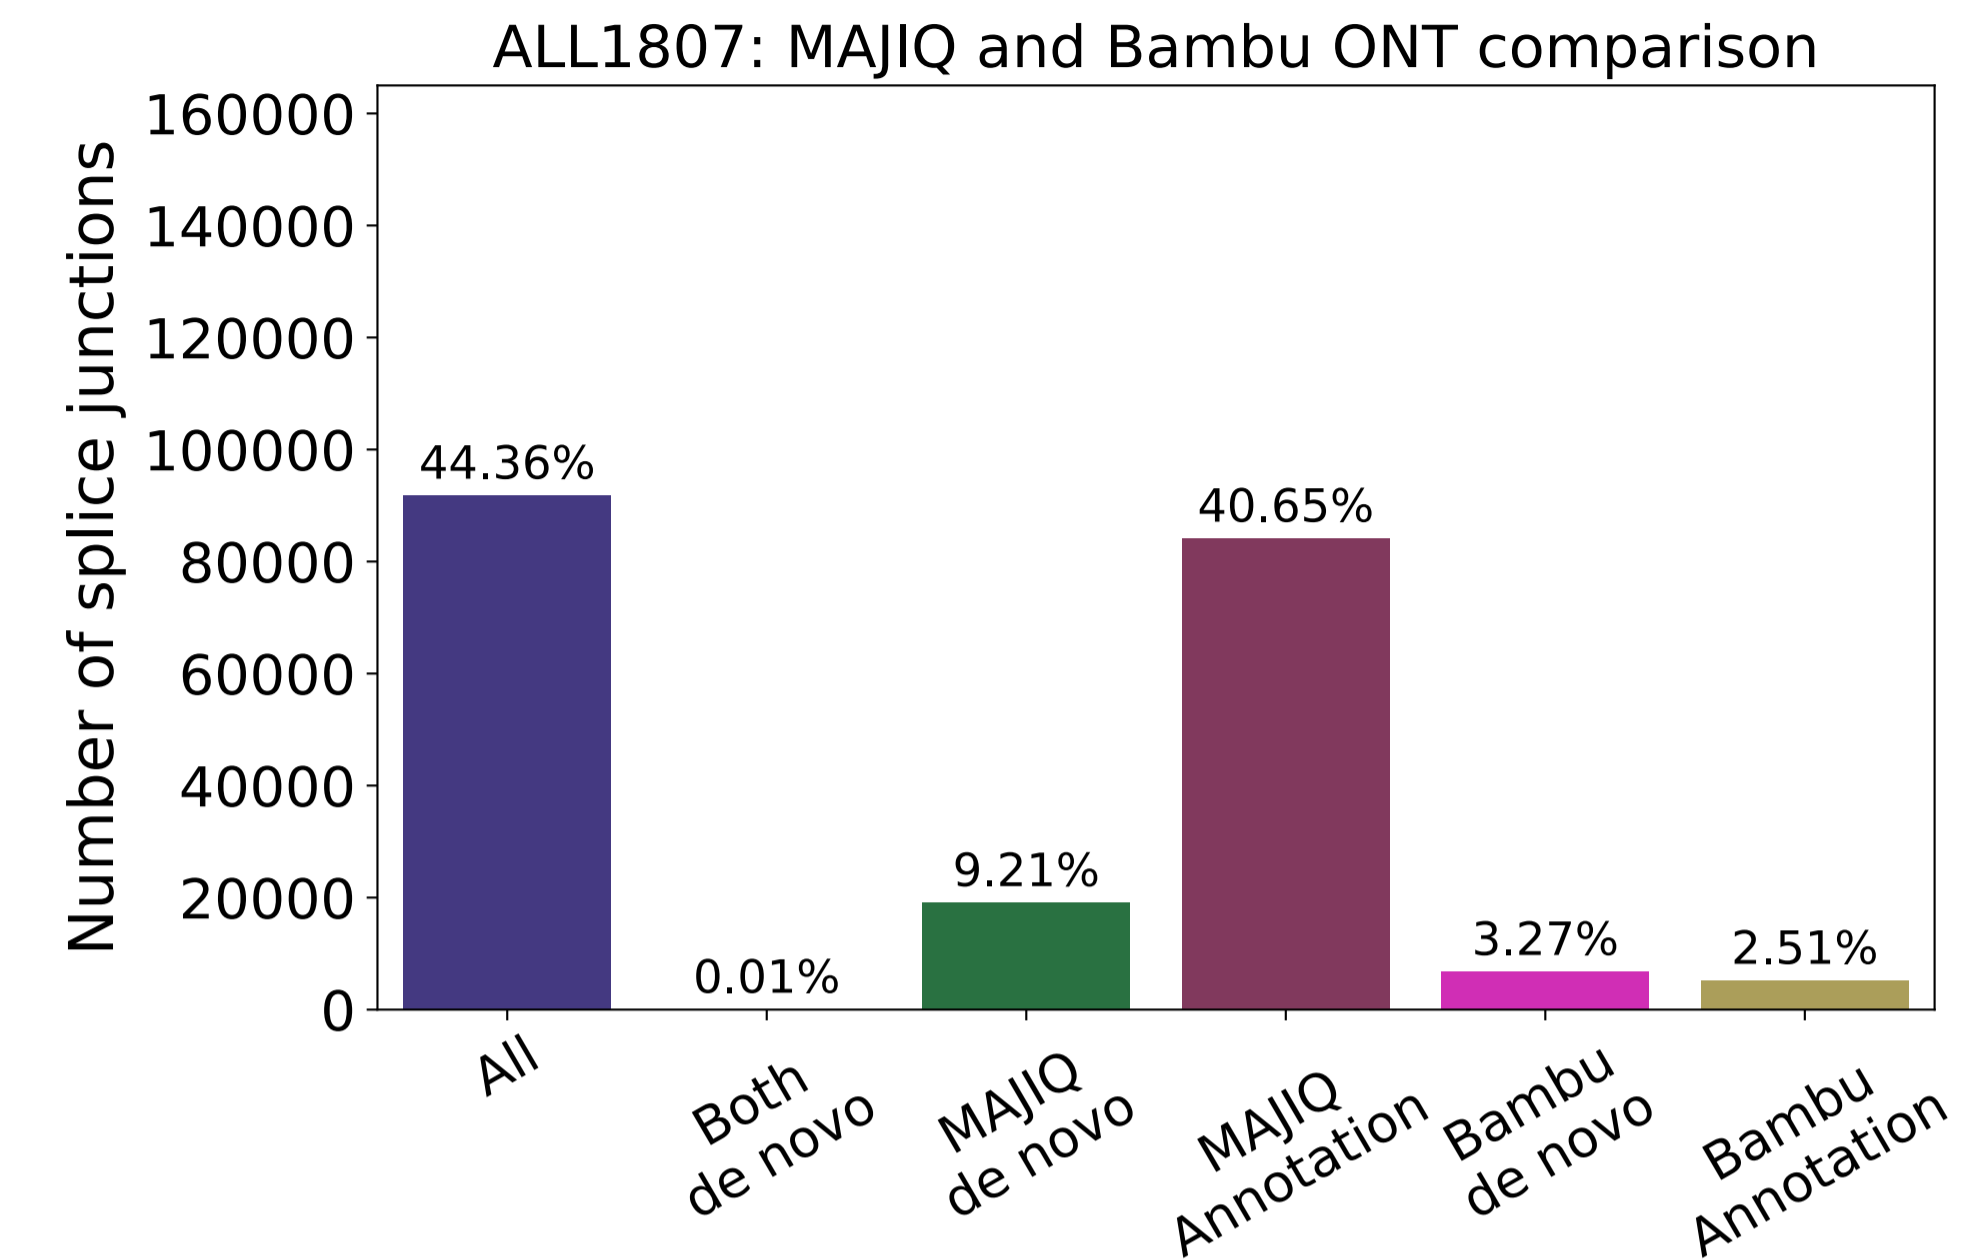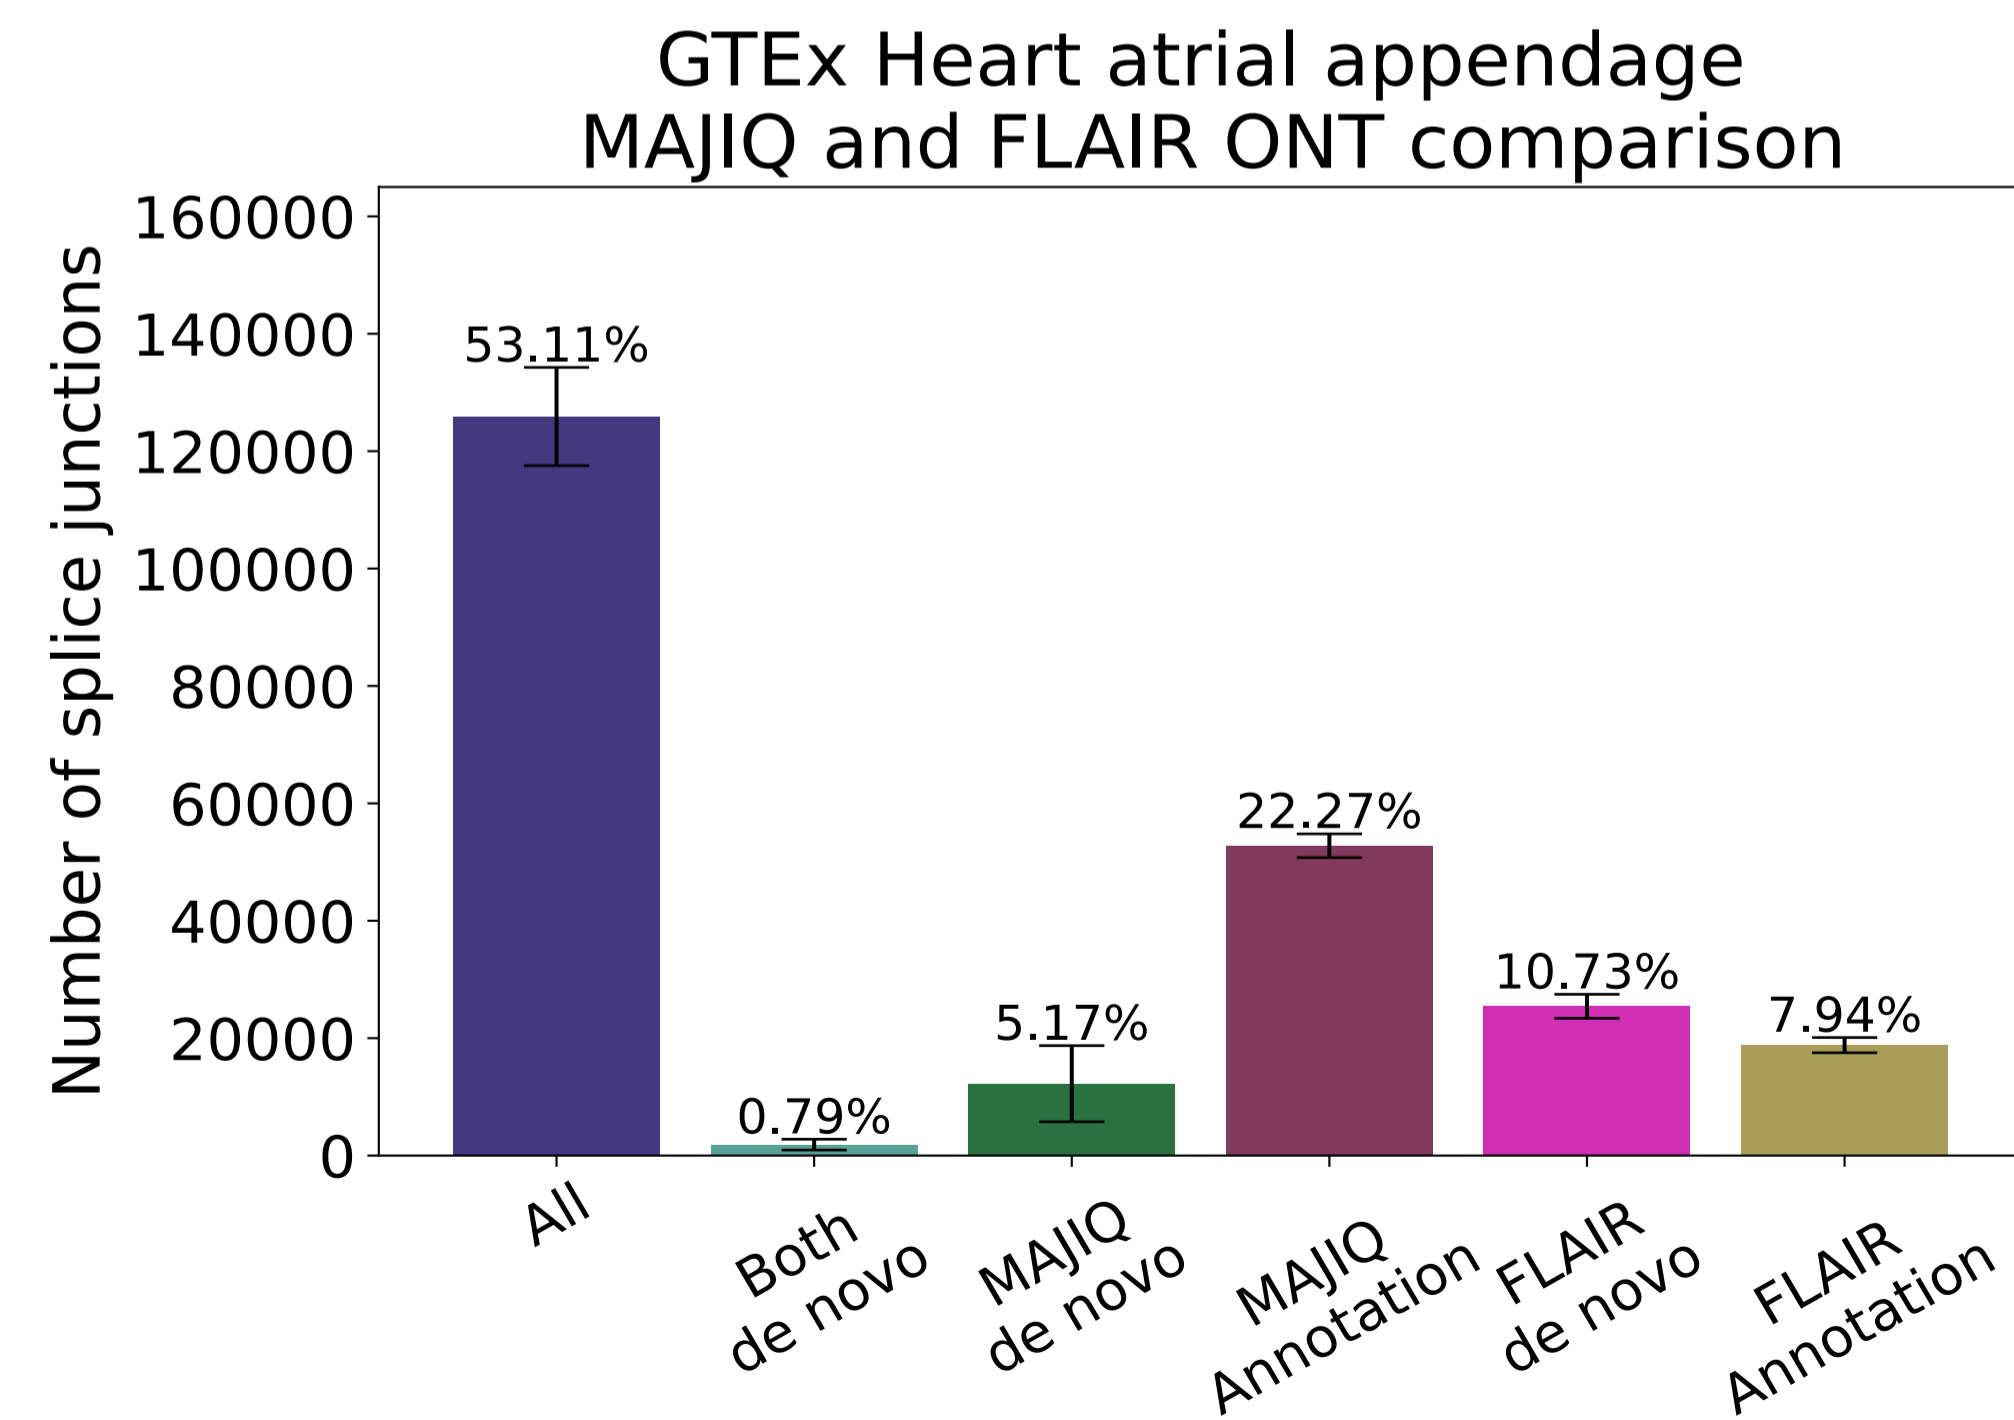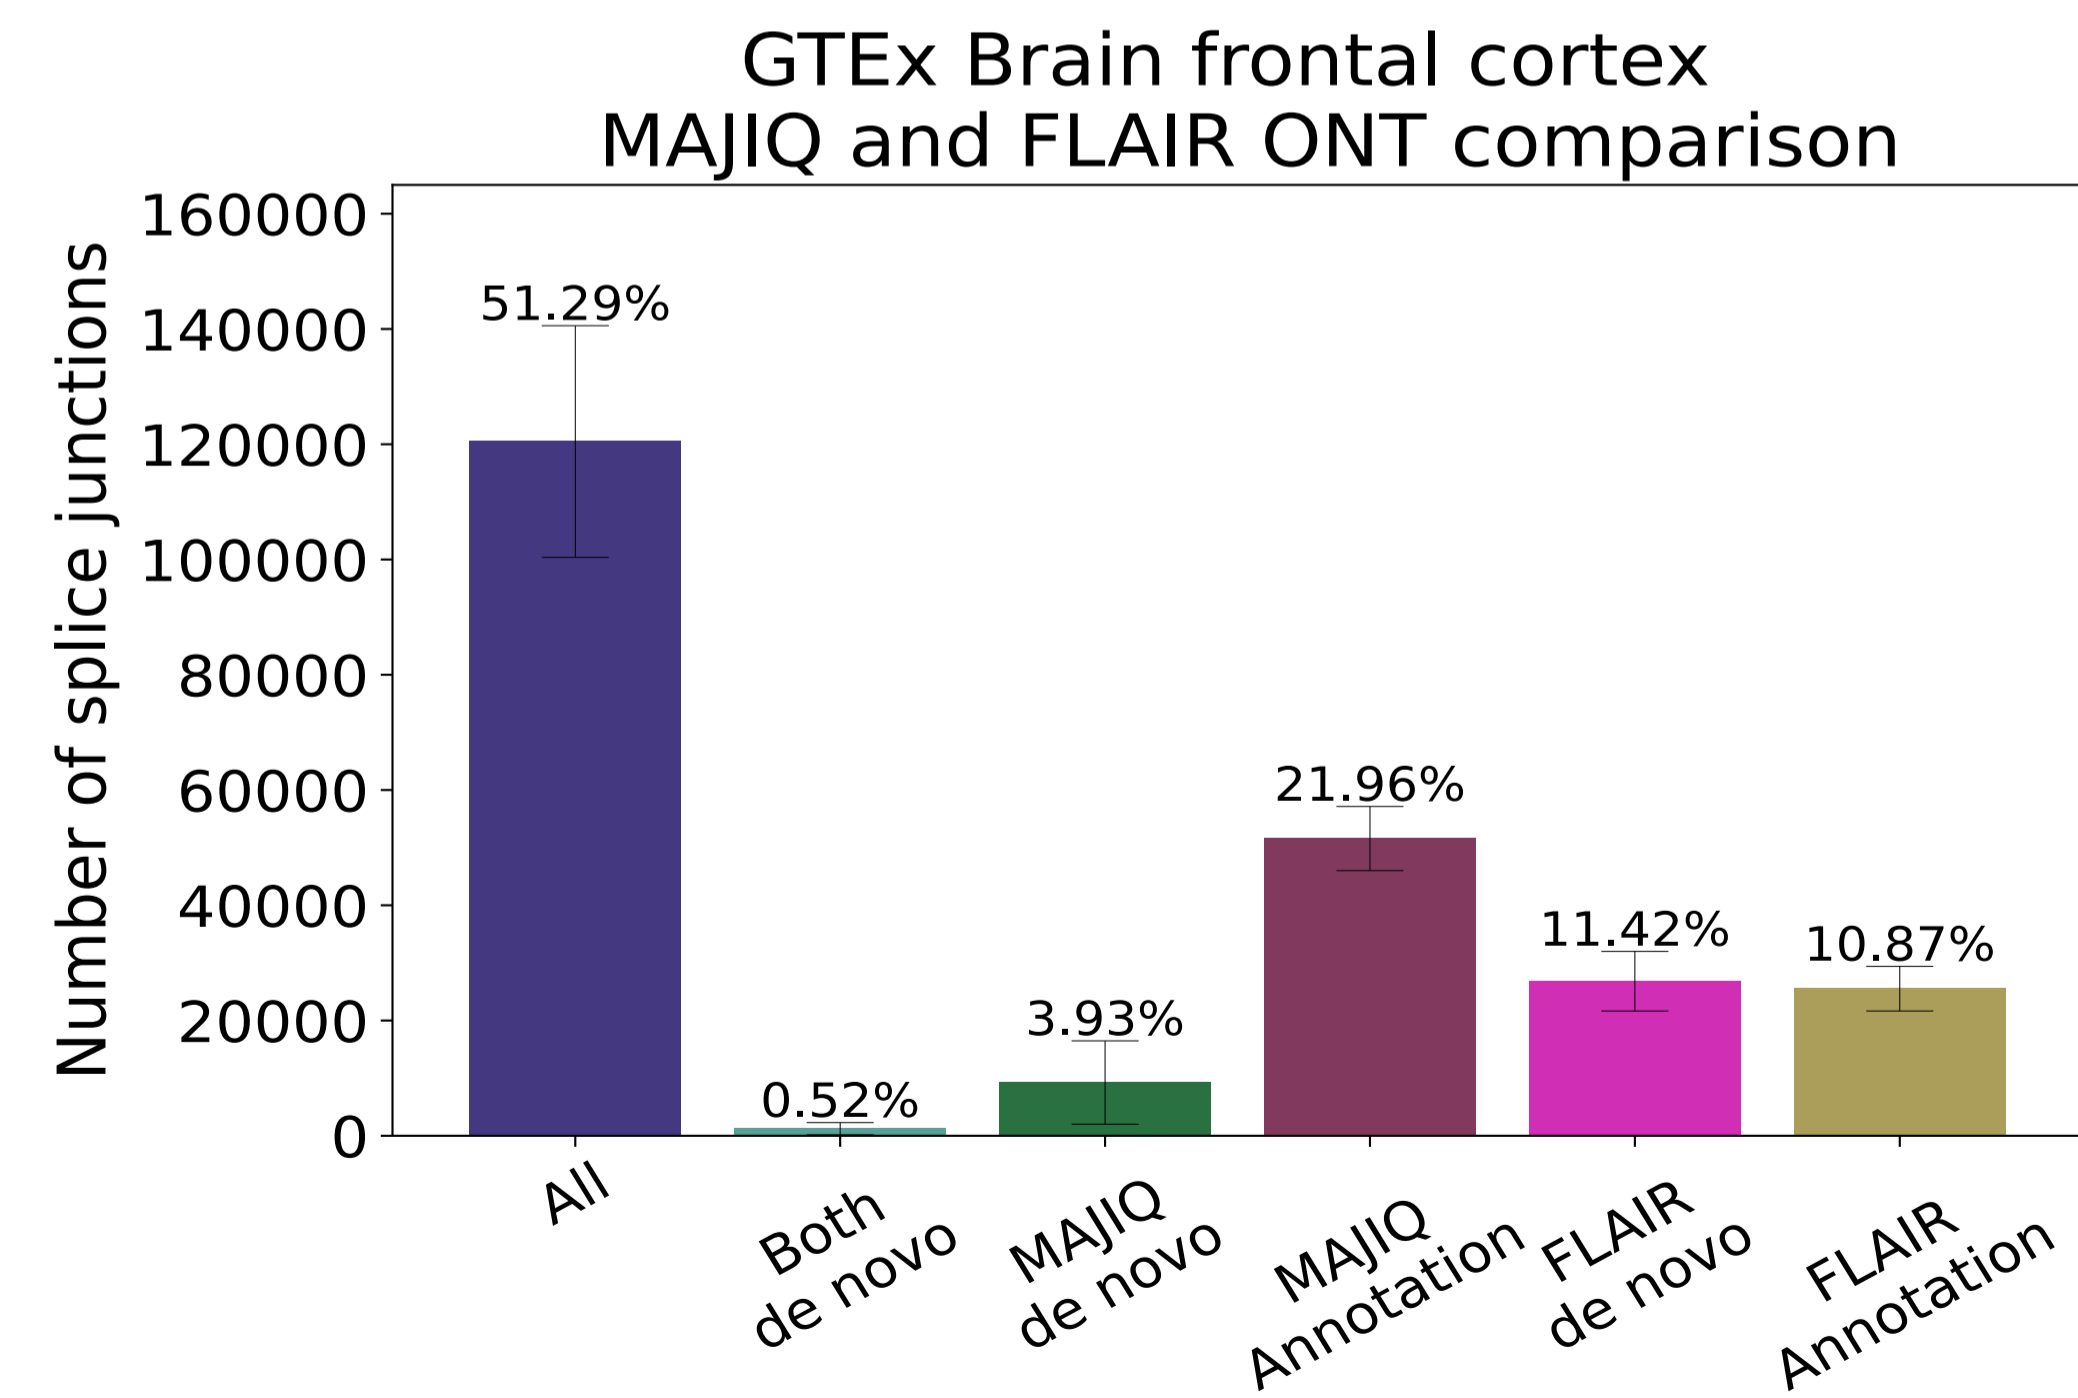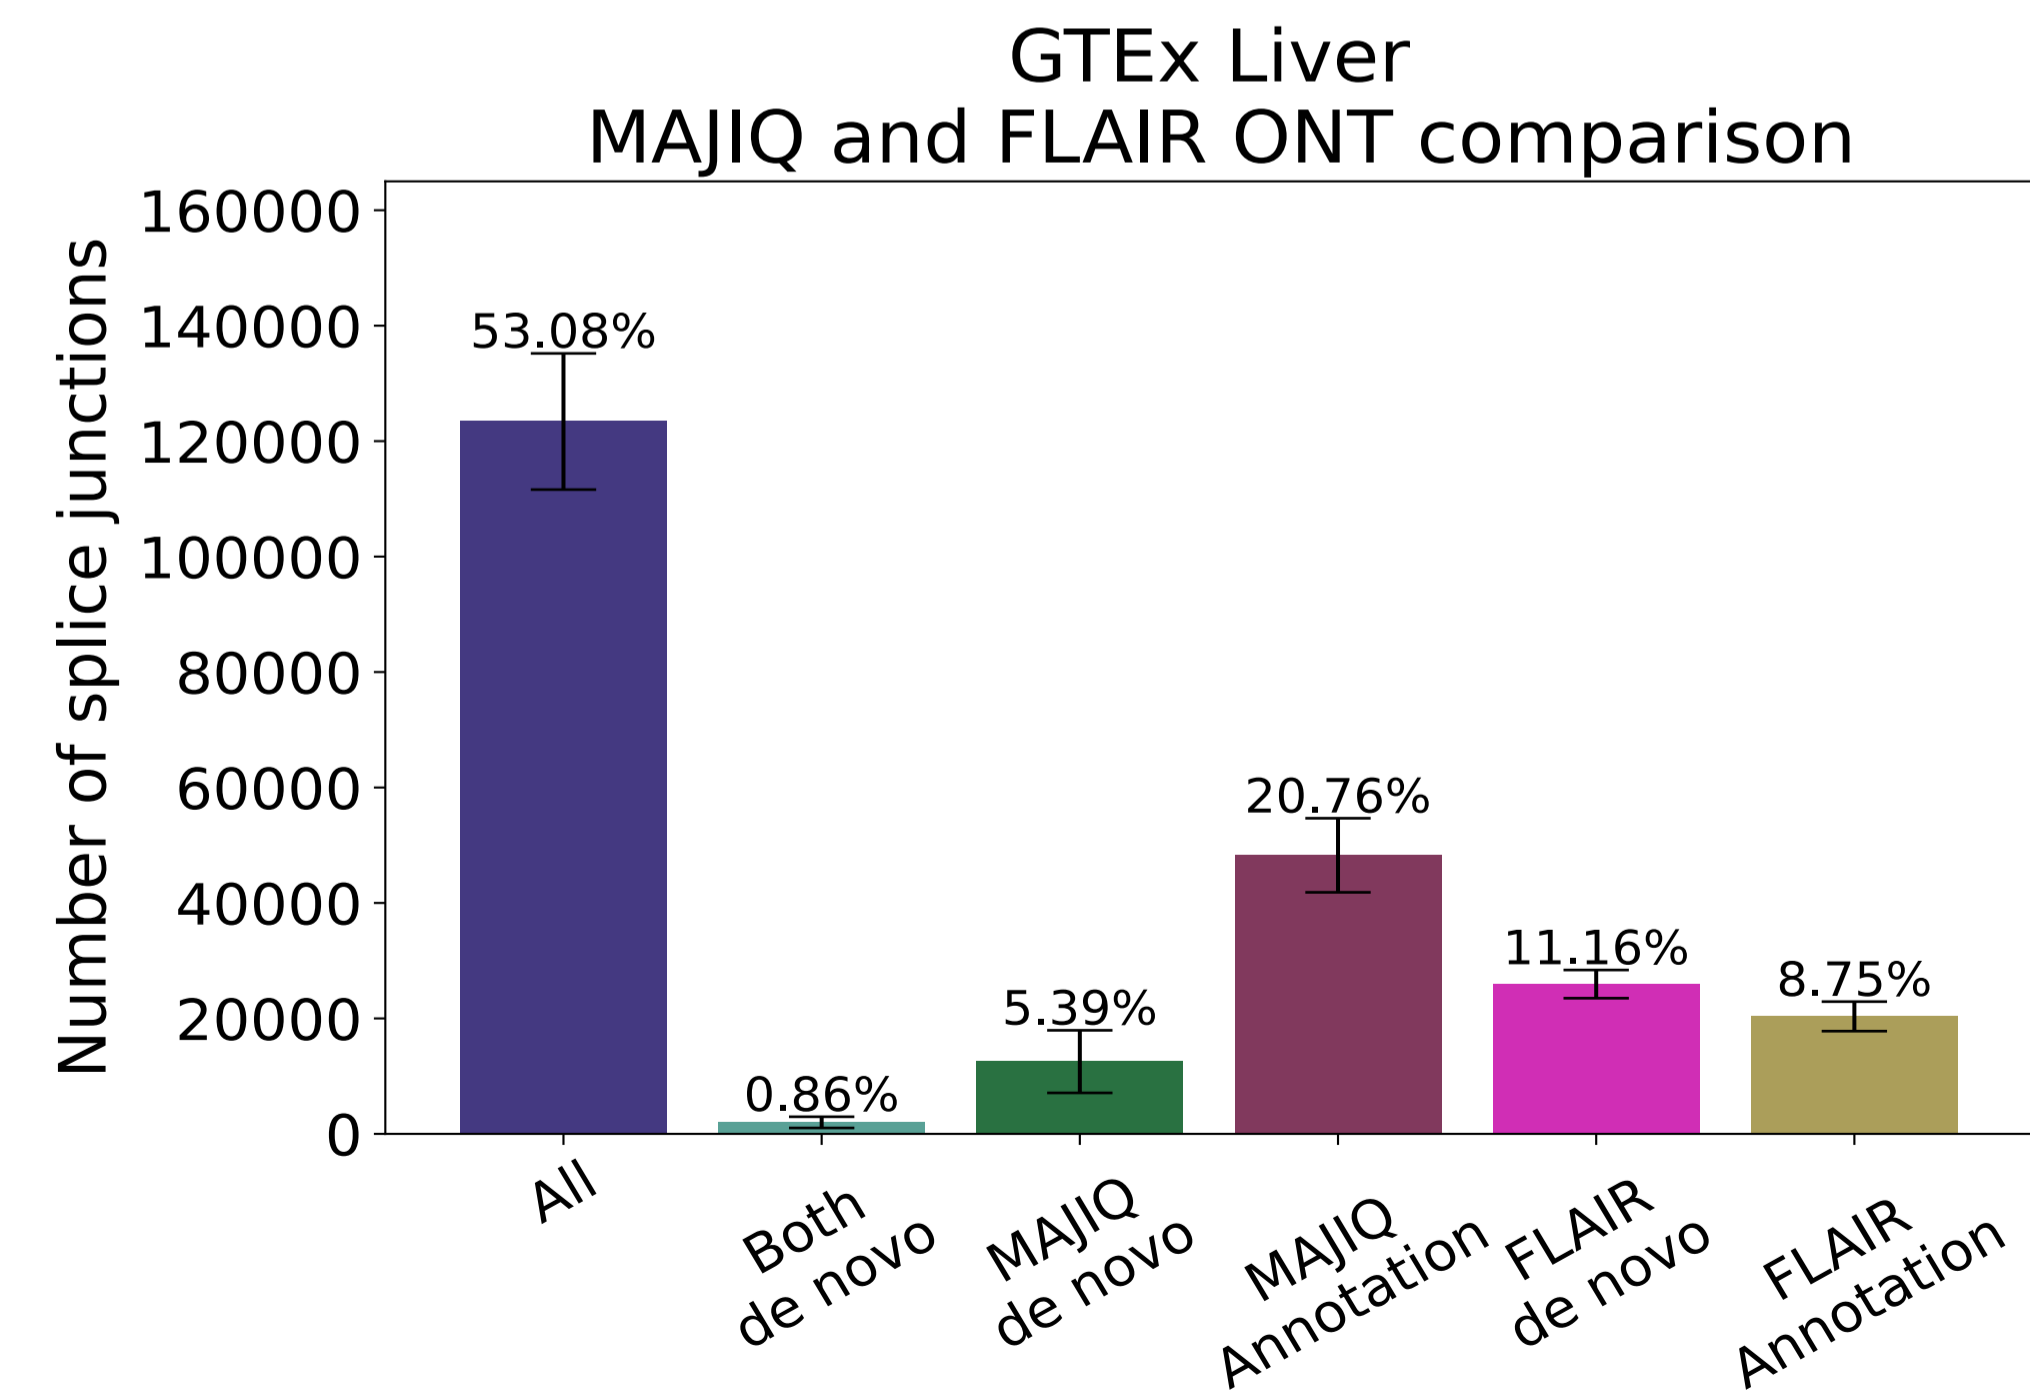

Supplement: Supplemental_code.zip [file Supplemental_Fig_S1.pdf › Supplemental_code/figures/Supplemental_Fig_S1/Supplemental_Fig_S1.pdf]

ALL1807: MAJIQ and Bambu ONT comparison

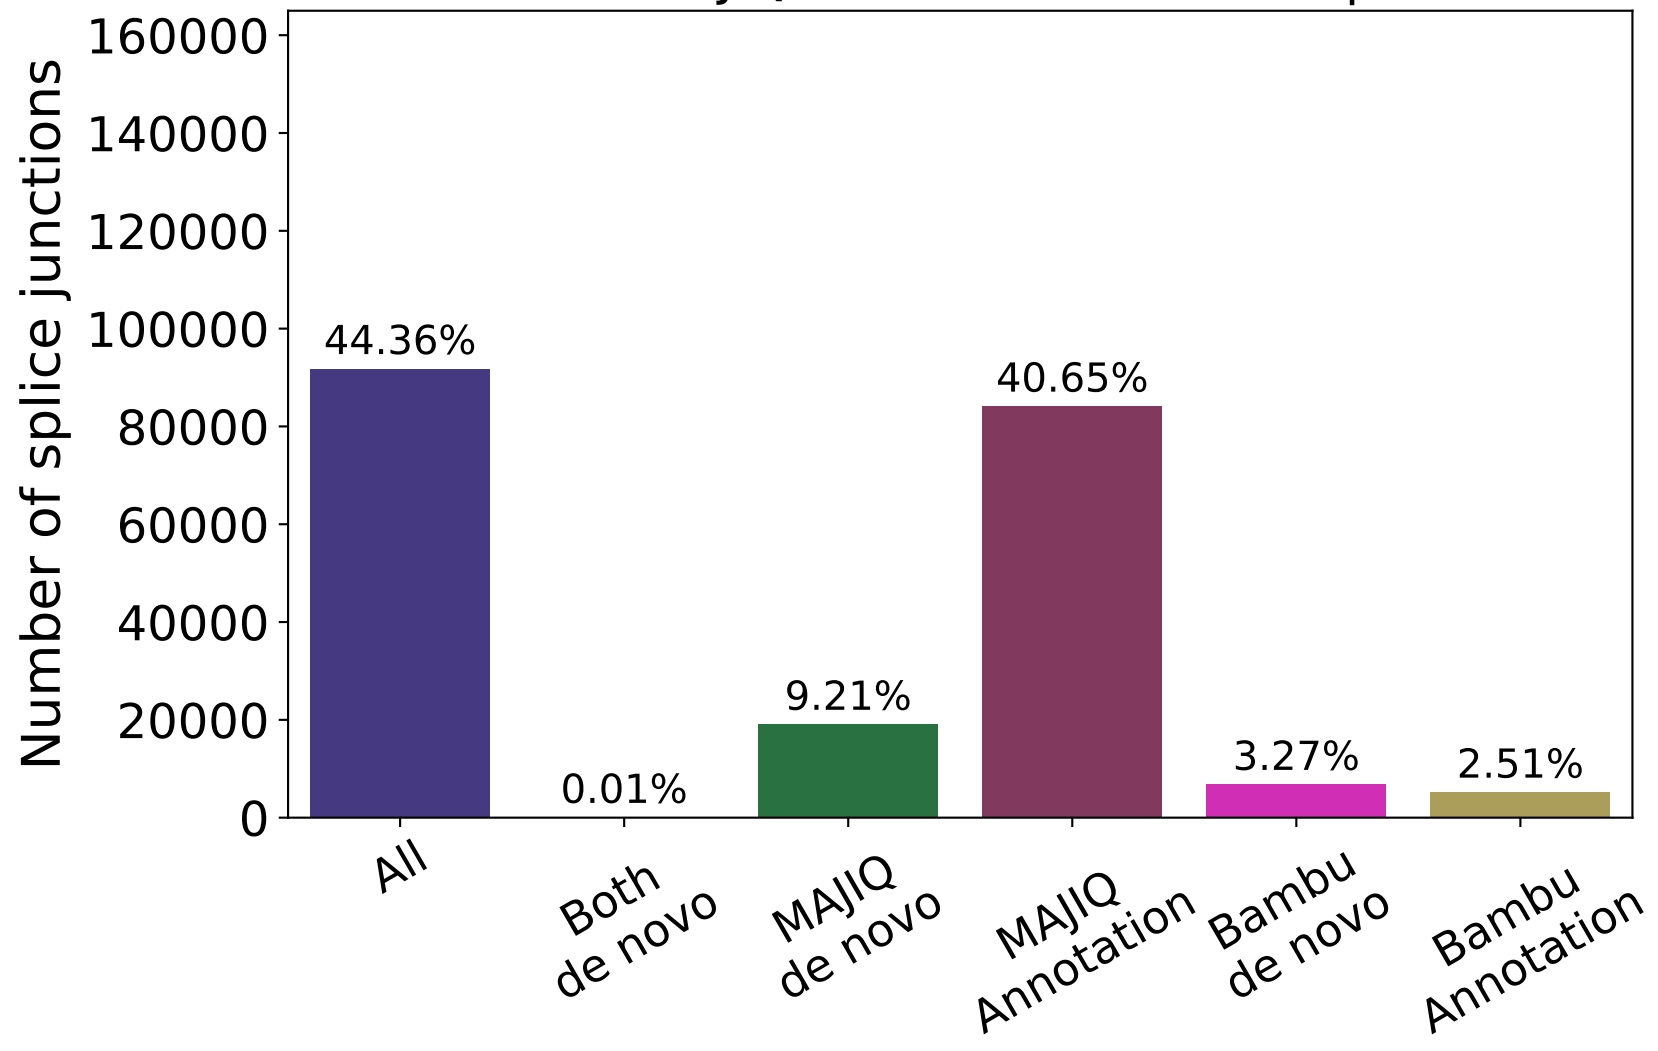

Supplement: Supplemental_code.zip [file Supplemental_Fig_S1_ball_bambu_post.pdf › Supplemental_code/figures/Supplemental_Fig_S1/Supplemental_Fig_S1_ball_bambu_post.pdf]

ALL1807: MAJIQ and ESPRESSO ONT comparison

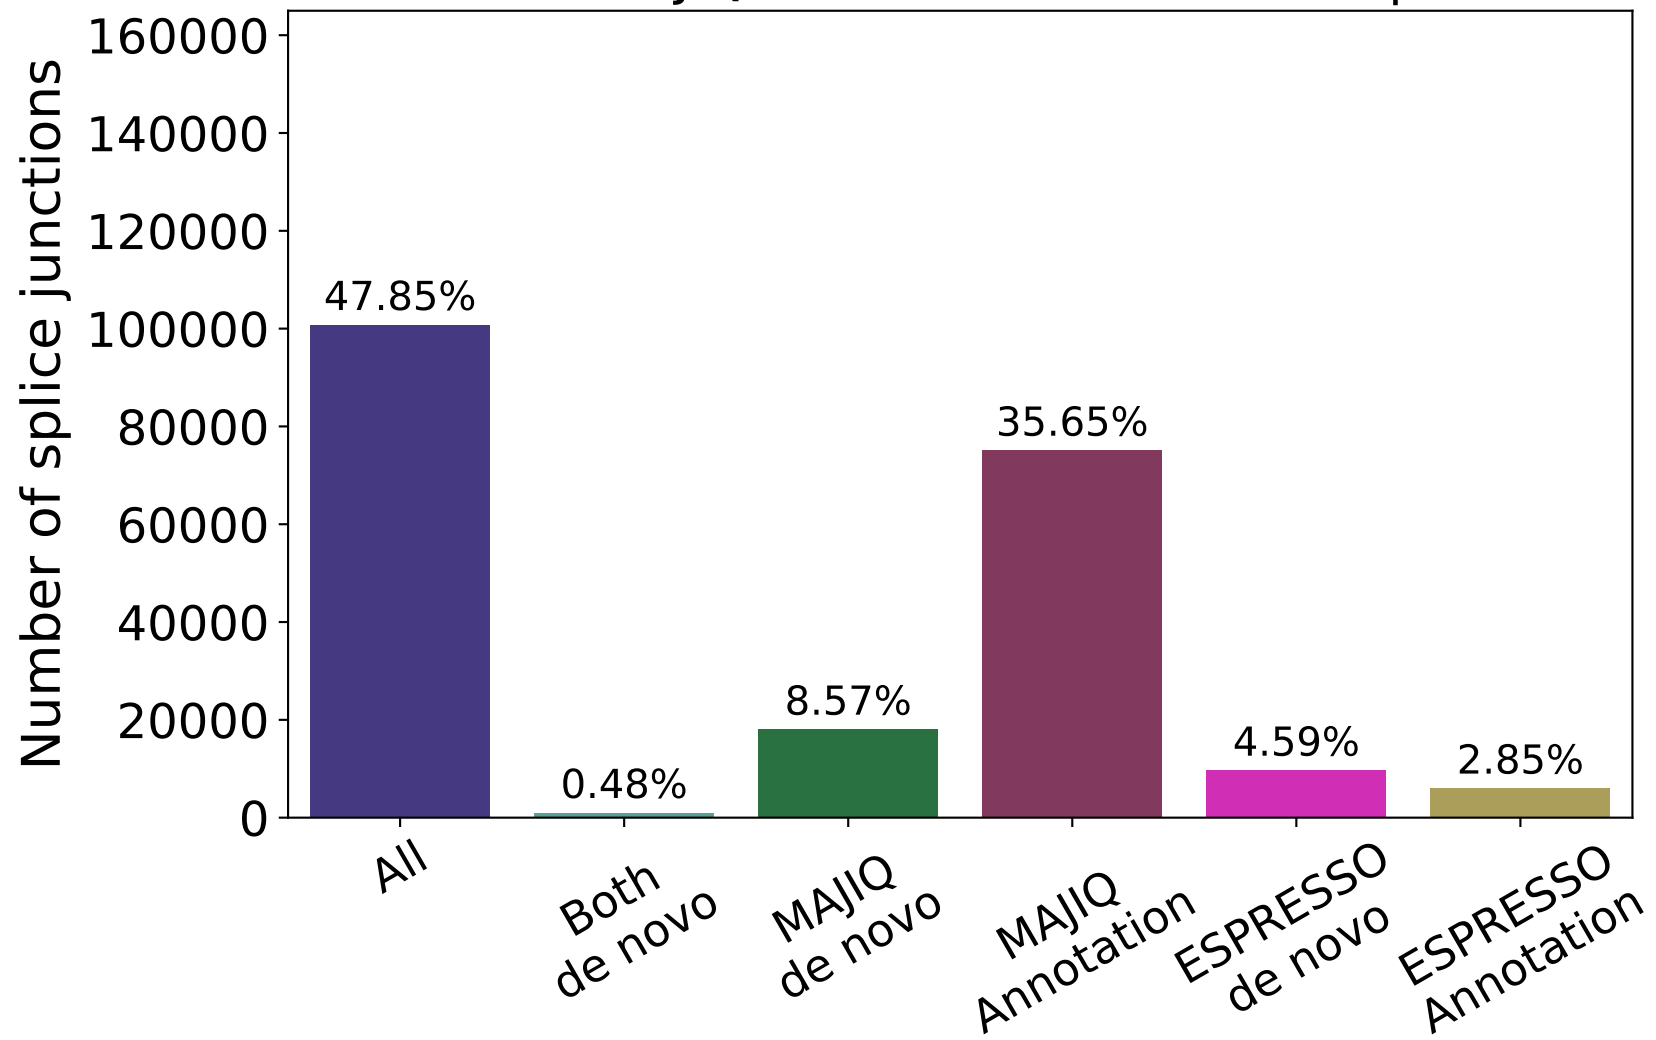

Supplement: Supplemental_code.zip [file Supplemental_Fig_S1_ball_esp_post.pdf › Supplemental_code/figures/Supplemental_Fig_S1/Supplemental_Fig_S1_ball_esp_post.pdf]

ALL1807: MAJIQ and FLAIR ONT comparison

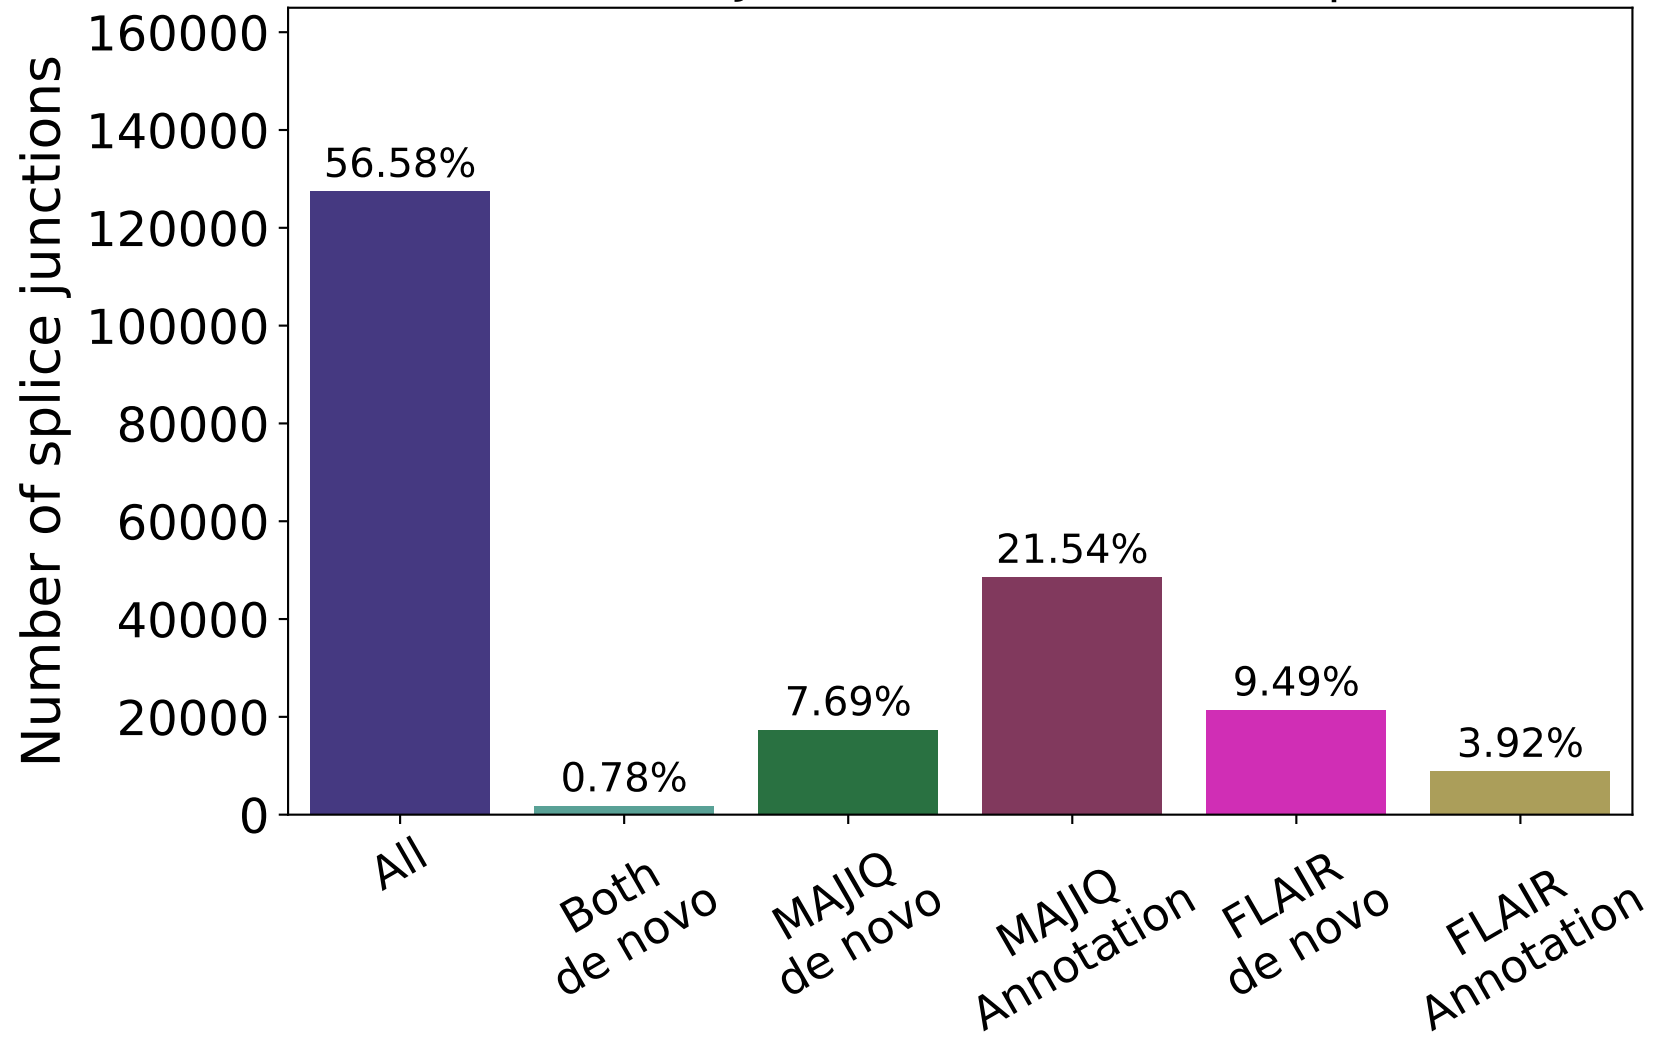

Supplement: Supplemental_code.zip [file Supplemental_Fig_S1_ball_flair_post.pdf › Supplemental_code/figures/Supplemental_Fig_S1/Supplemental_Fig_S1_ball_flair_post.pdf]

ALL1807: MAJIQ and IsoQuant ONT comparison

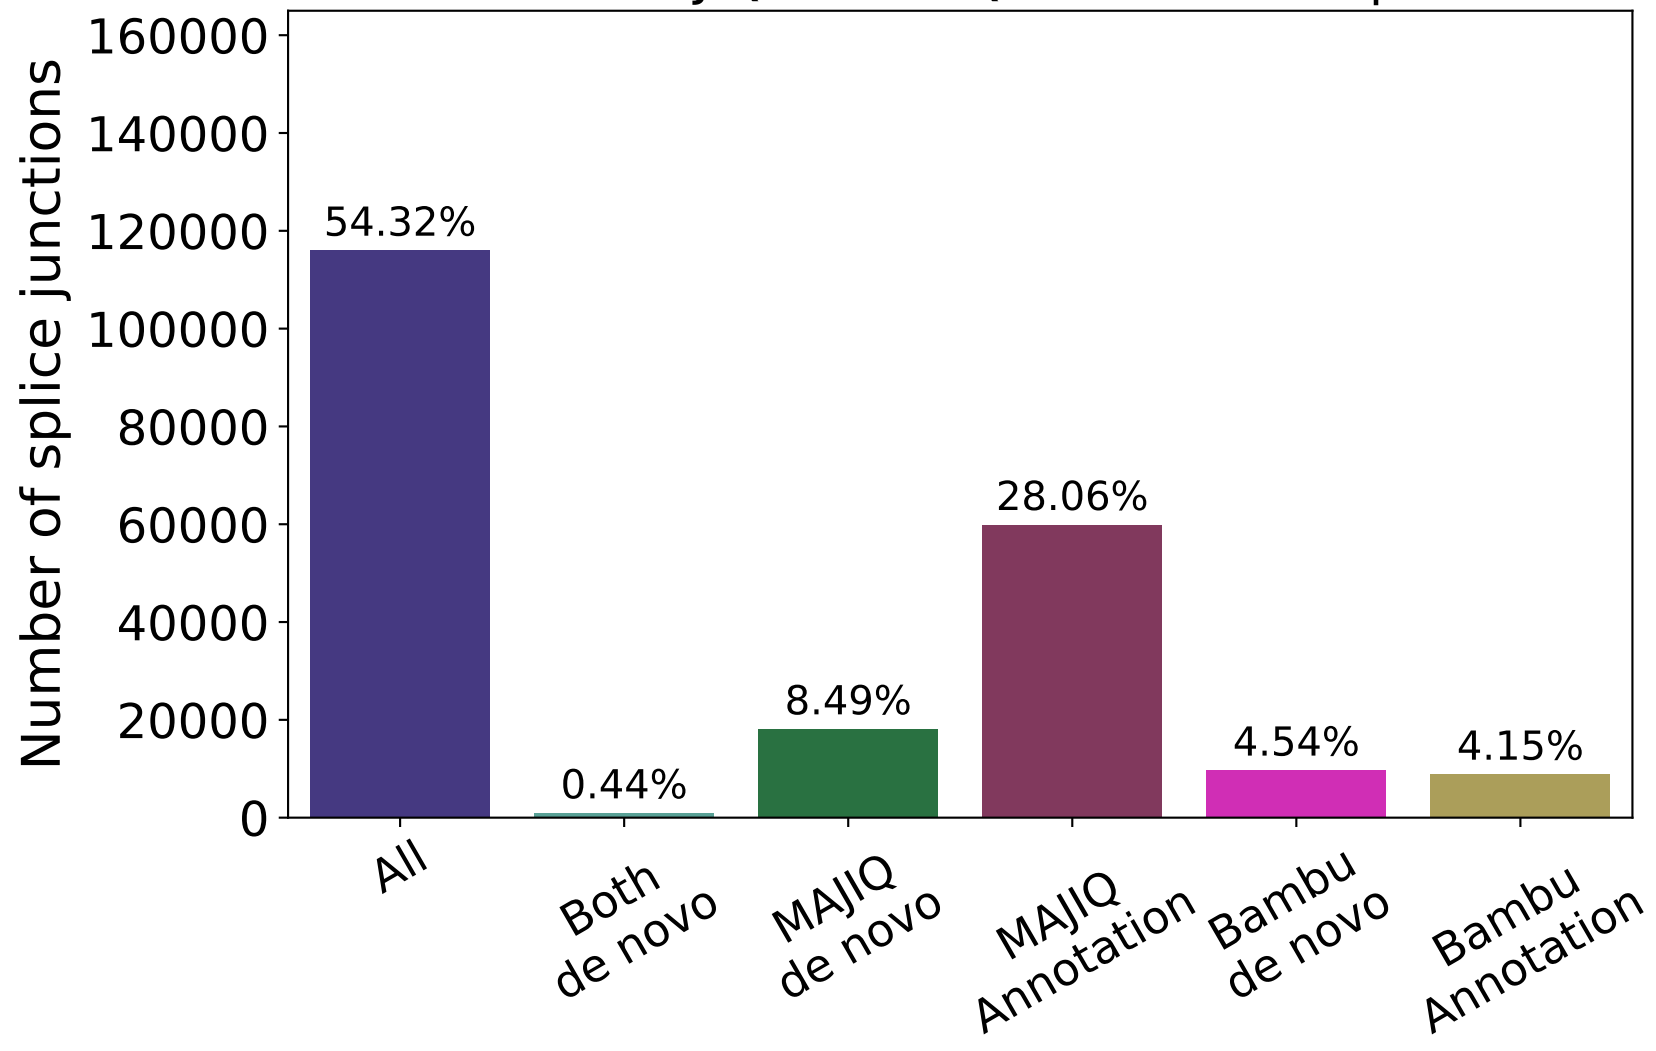

Supplement: Supplemental_code.zip [file Supplemental_Fig_S1_ball_isq_post.pdf › Supplemental_code/figures/Supplemental_Fig_S1/Supplemental_Fig_S1_ball_isq_post.pdf]

# GTEX Brain frontal cortex MAJIQ and FLAIR ONT comparison

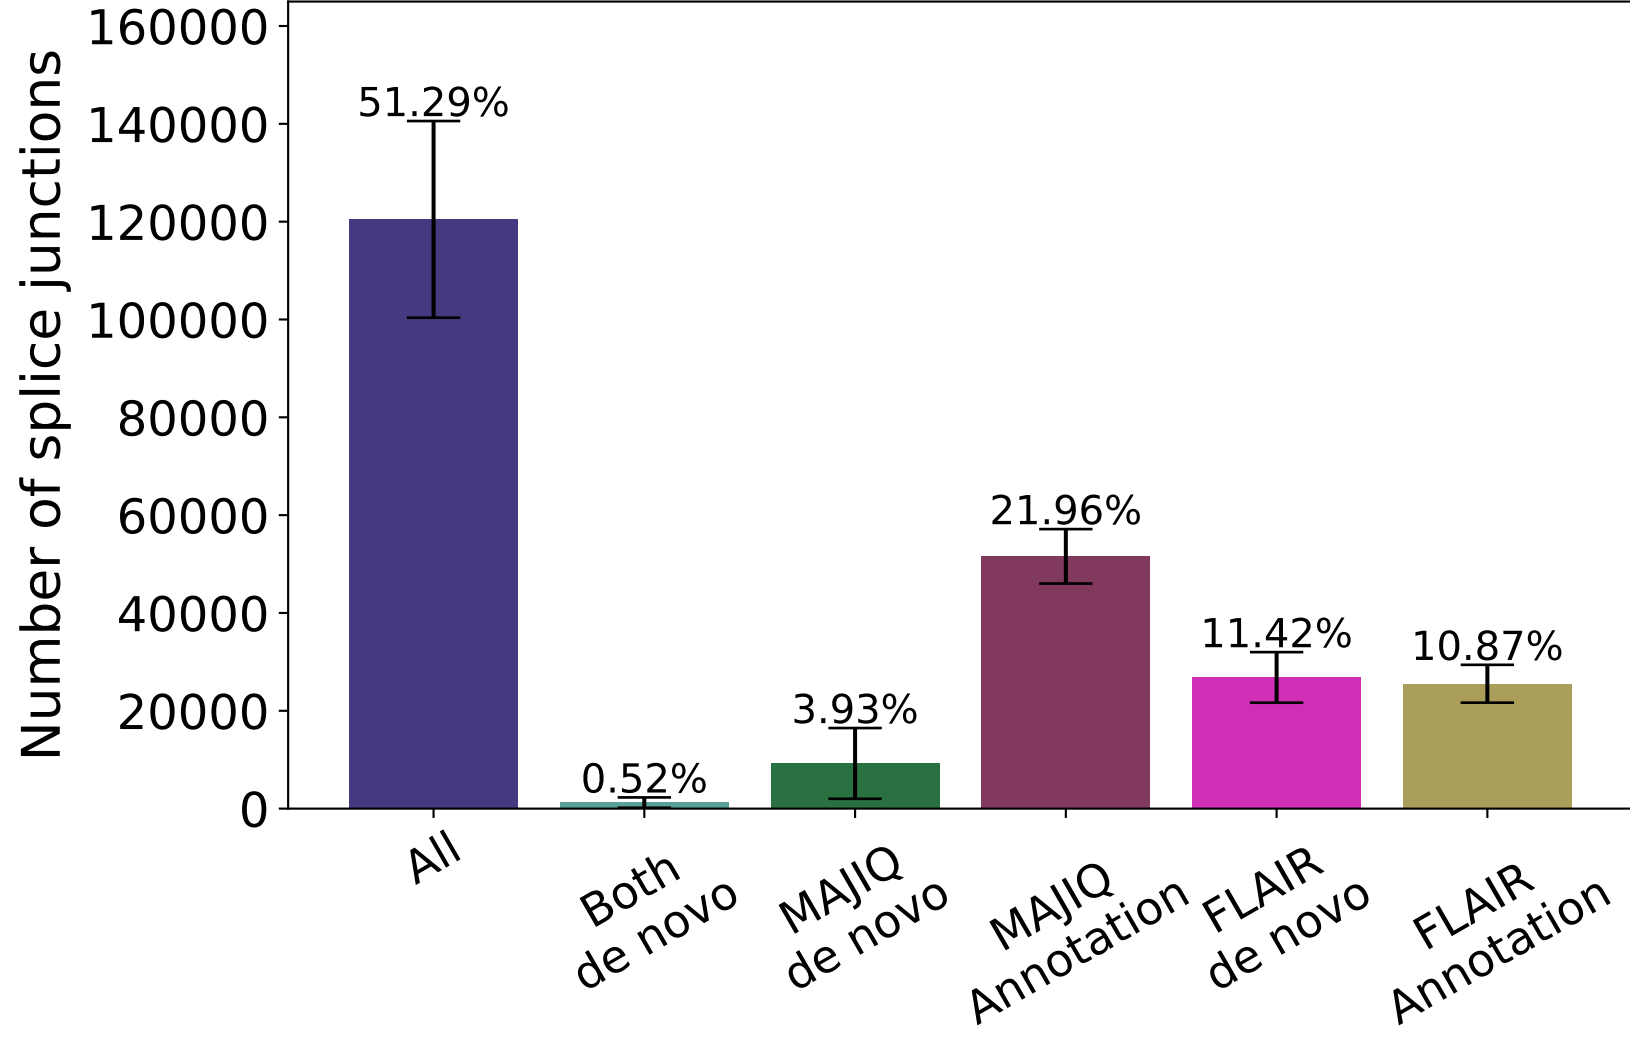

Supplement: Supplemental_code.zip [file Supplemental_Fig_S1_brain_post.pdf › Supplemental_code/figures/Supplemental_Fig_S1/Supplemental_Fig_S1_brain_post.pdf]

# GTEX Heart atrial appendage MAJIQ and FLAIR ONT comparison

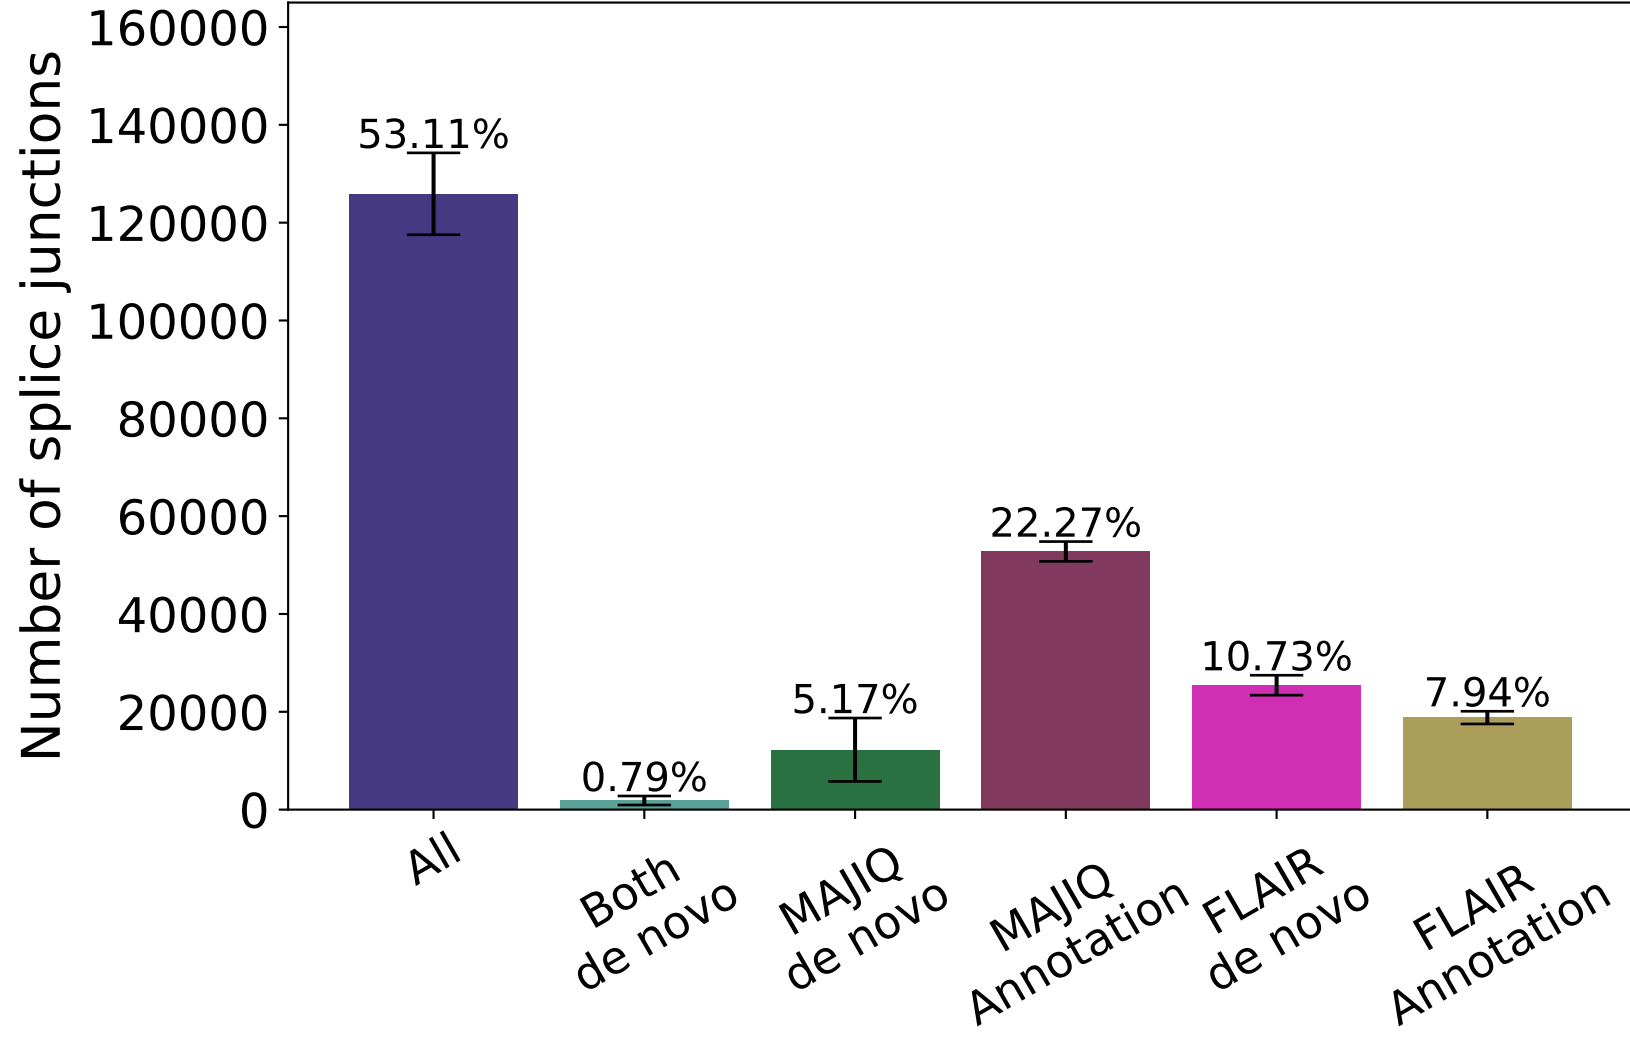

Supplement: Supplemental_code.zip [file Supplemental_Fig_S1_heart_post.pdf › Supplemental_code/figures/Supplemental_Fig_S1/Supplemental_Fig_S1_heart_post.pdf]

# GTEX Liver

## MAJIQ and FLAIR ONT comparison

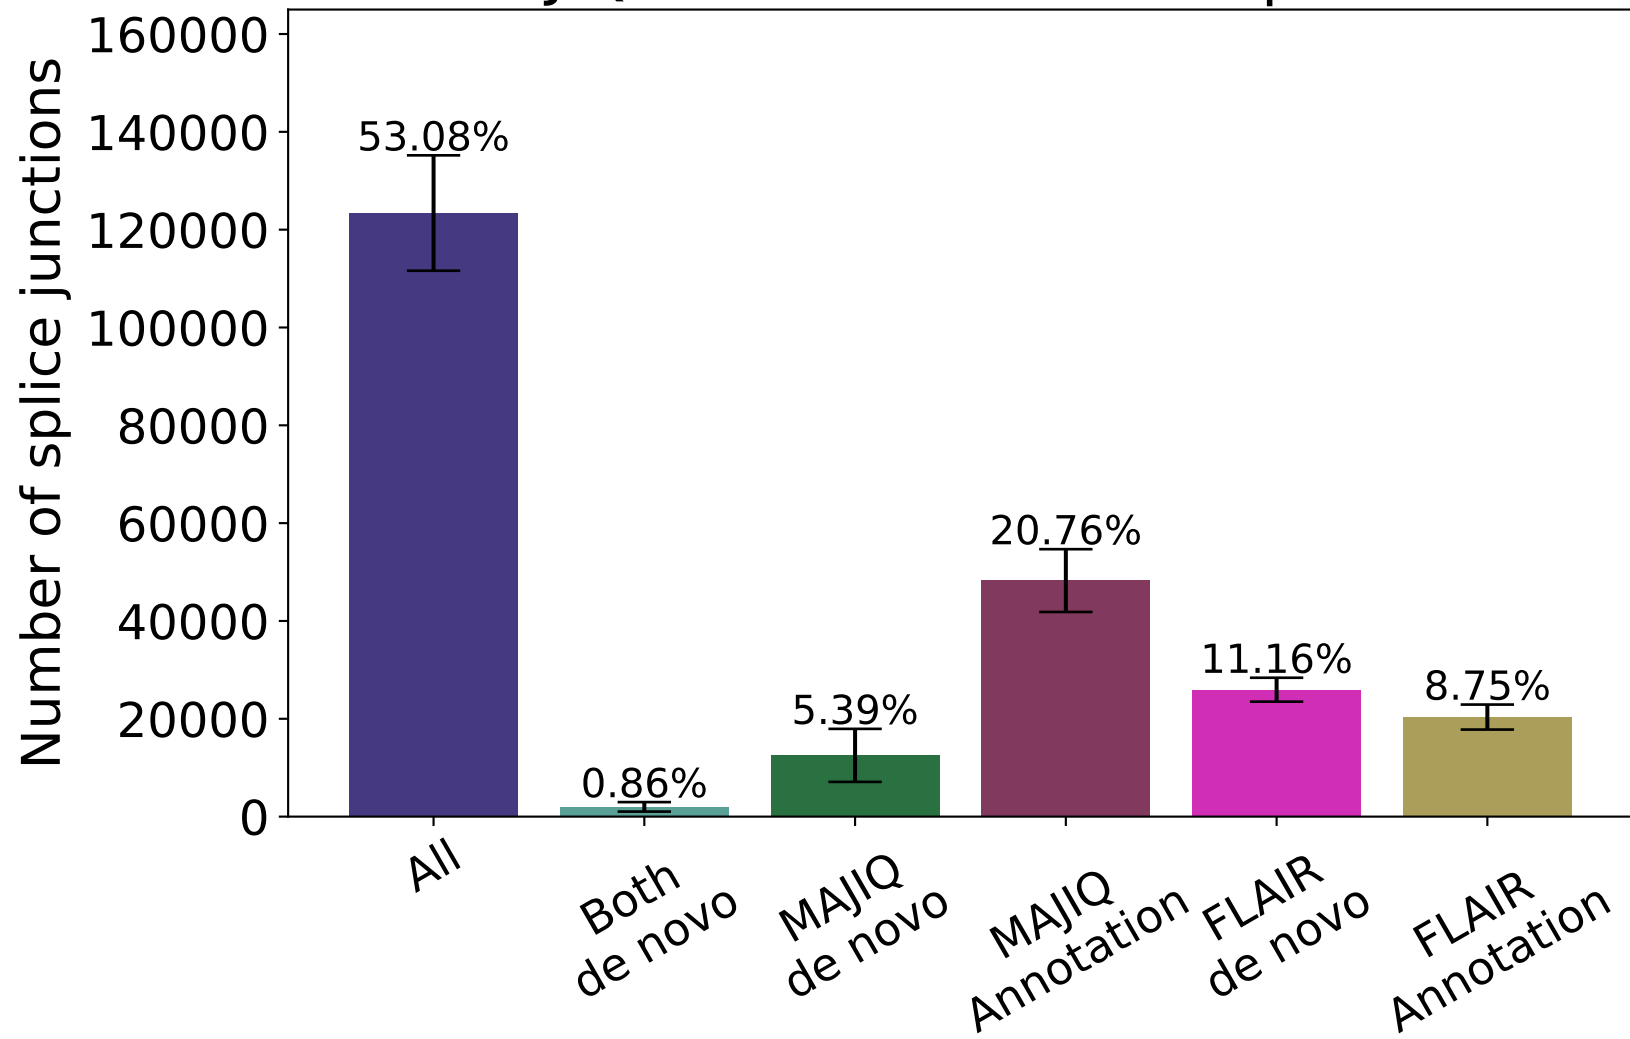

Supplement: Supplemental_code.zip [file Supplemental_Fig_S1_liver_post.pdf › Supplemental_code/figures/Supplemental_Fig_S1/Supplemental_Fig_S1_liver_post.pdf]

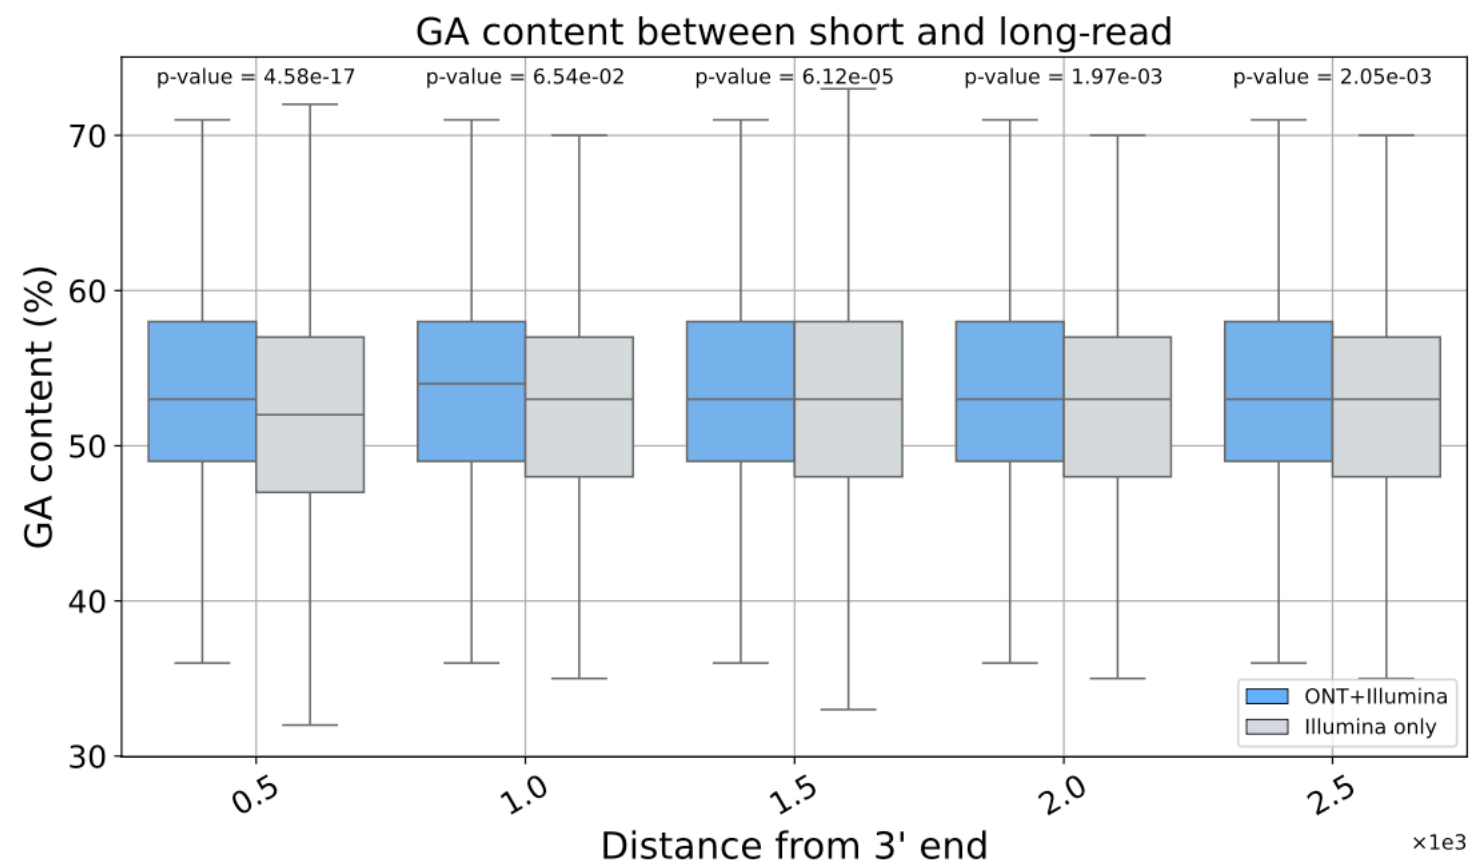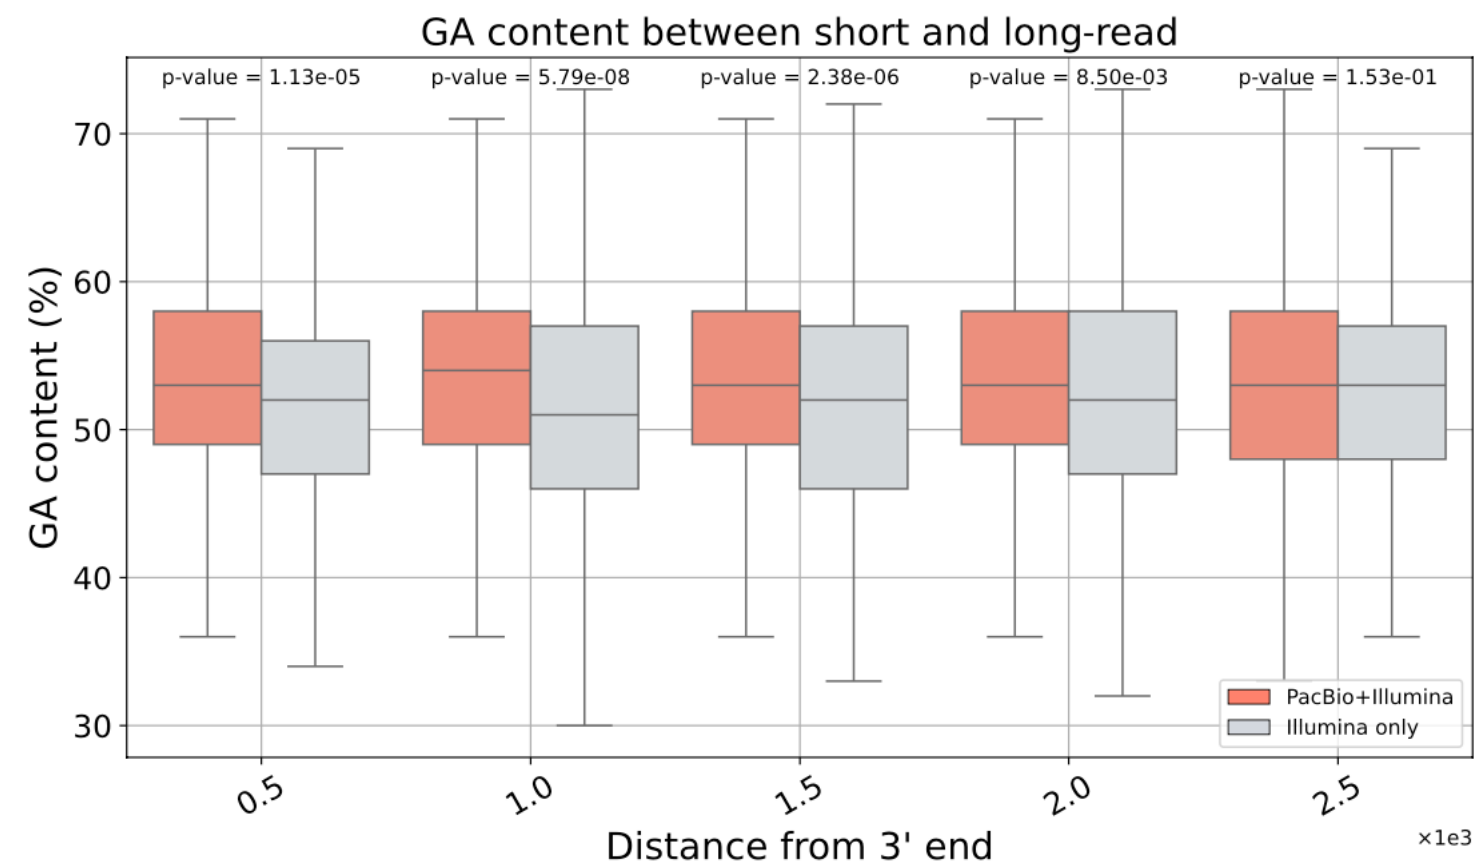

Supplement: Supplemental_code.zip [file Supplemental_Fig_S10.pdf › Supplemental_code/figures/Supplemental_Fig_S10/Supplemental_Fig_S10.pdf]

# GA content between short and long-read

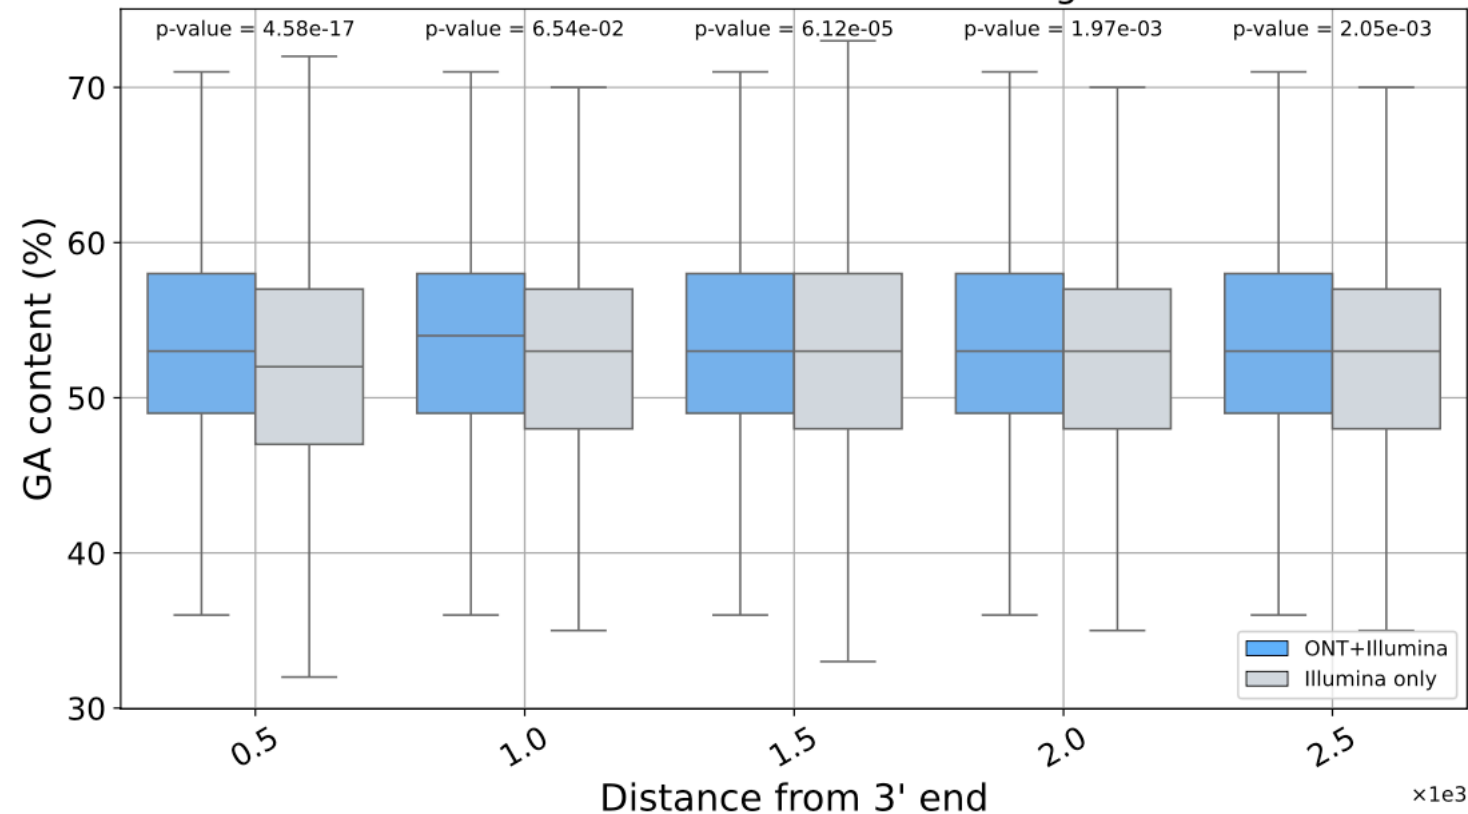

Supplement: Supplemental_code.zip [file Supplemental_Fig_S10_ga_ont.pdf › Supplemental_code/figures/Supplemental_Fig_S10/Supplemental_Fig_S10_ga_ont.pdf]

# GA content between short and long-read

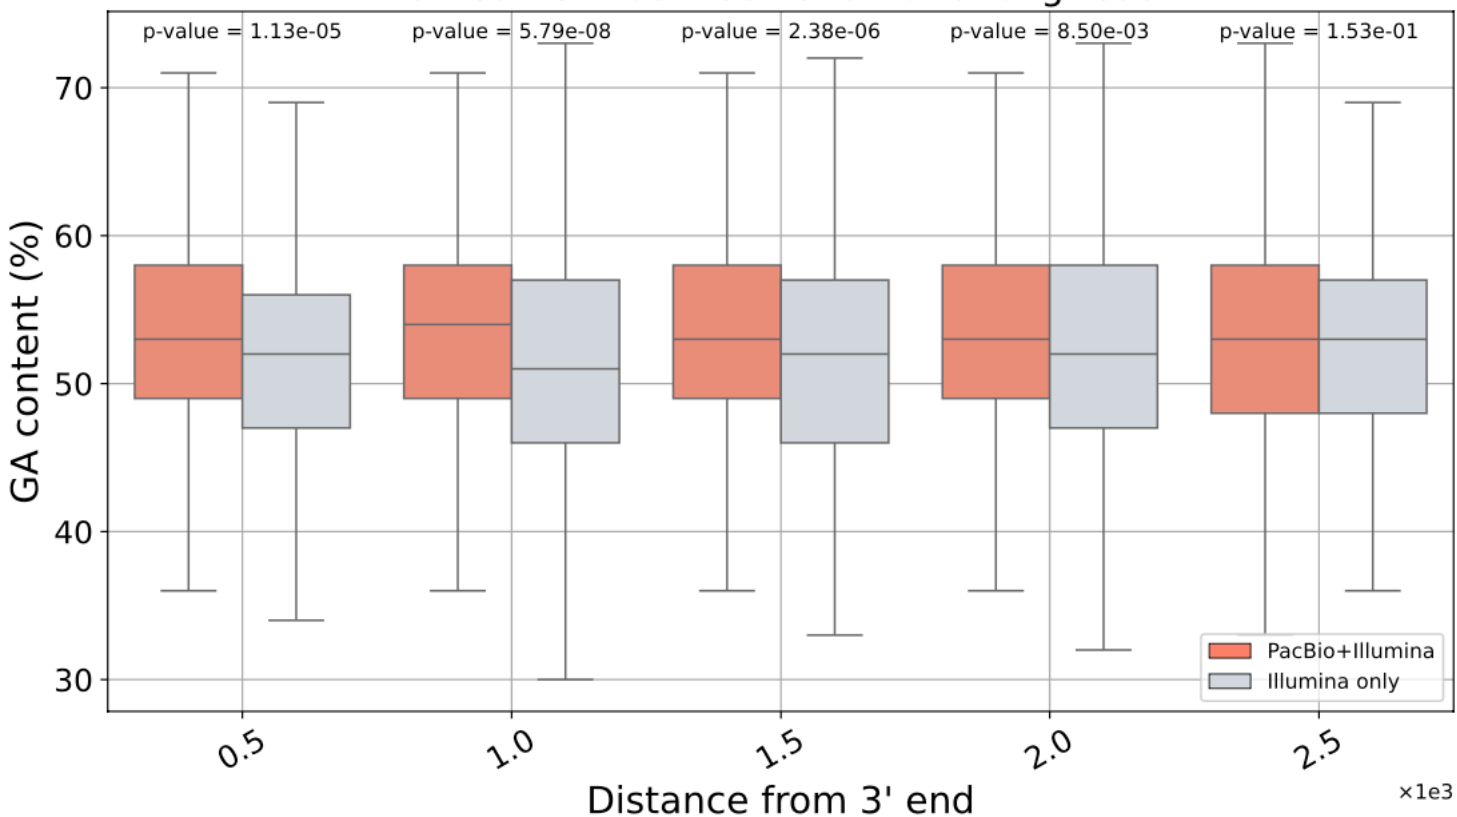

Supplement: Supplemental_code.zip [file Supplemental_Fig_S10_ga_pcb.pdf › Supplemental_code/figures/Supplemental_Fig_S10/Supplemental_Fig_S10_ga_pcb.pdf]

# Bambu and MAJIQ intron retention length comparison

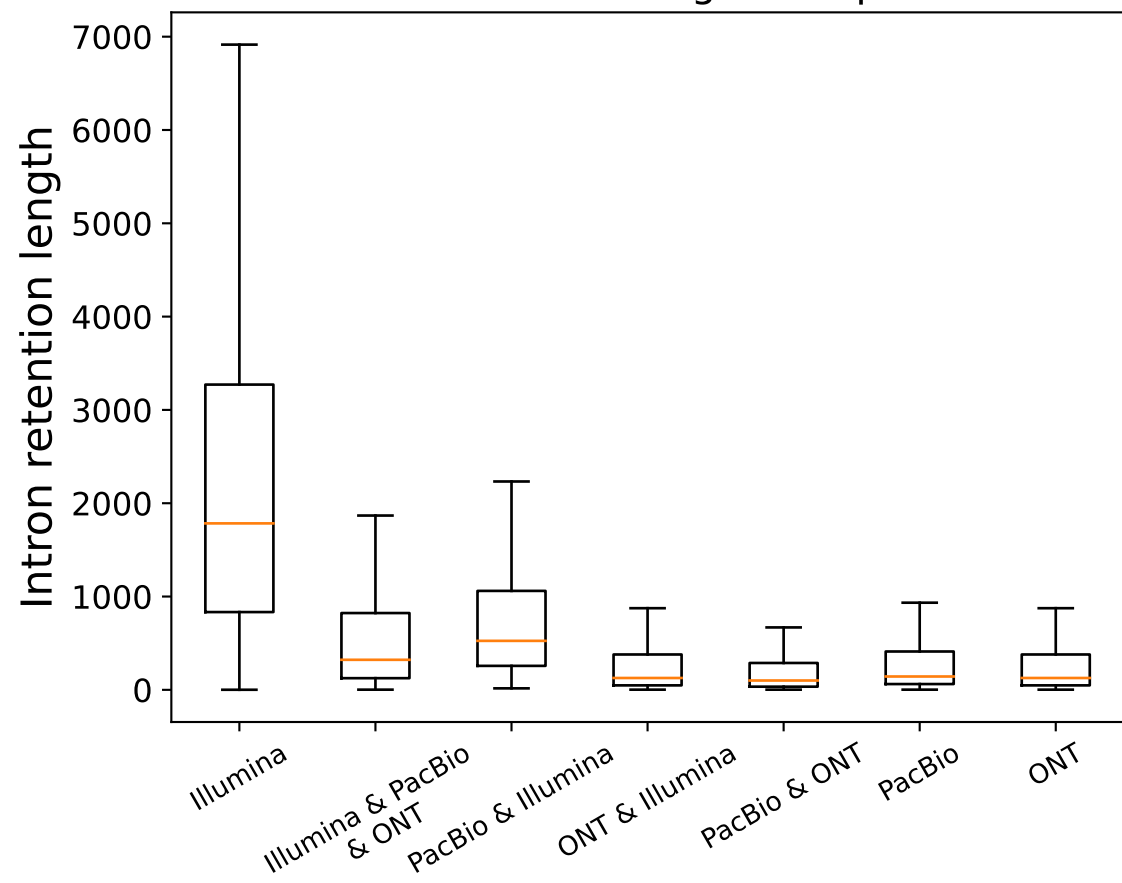

Supplement: Supplemental_code.zip [file Supplemental_Fig_S11A_boxplot_bambu.pdf › Supplemental_code/figures/Supplemental_Fig_S11/Supplemental_Fig_S11A_boxplot_bambu.pdf]

# ESPRESSO and MAJIQ intron retention length comparison

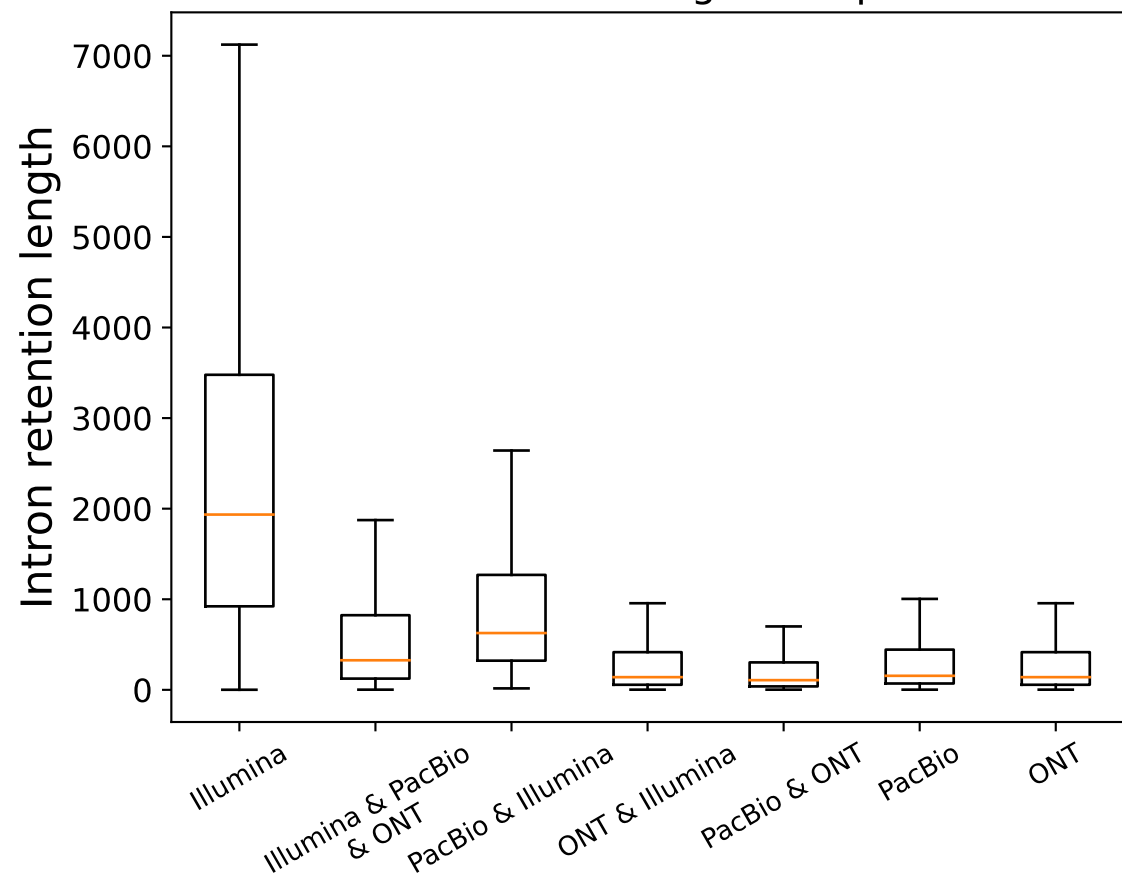

Supplement: Supplemental_code.zip [file Supplemental_Fig_S11A_boxplot_esp.pdf › Supplemental_code/figures/Supplemental_Fig_S11/Supplemental_Fig_S11A_boxplot_esp.pdf]

# FLAIR and MAJIQ

## intron retention length comparison

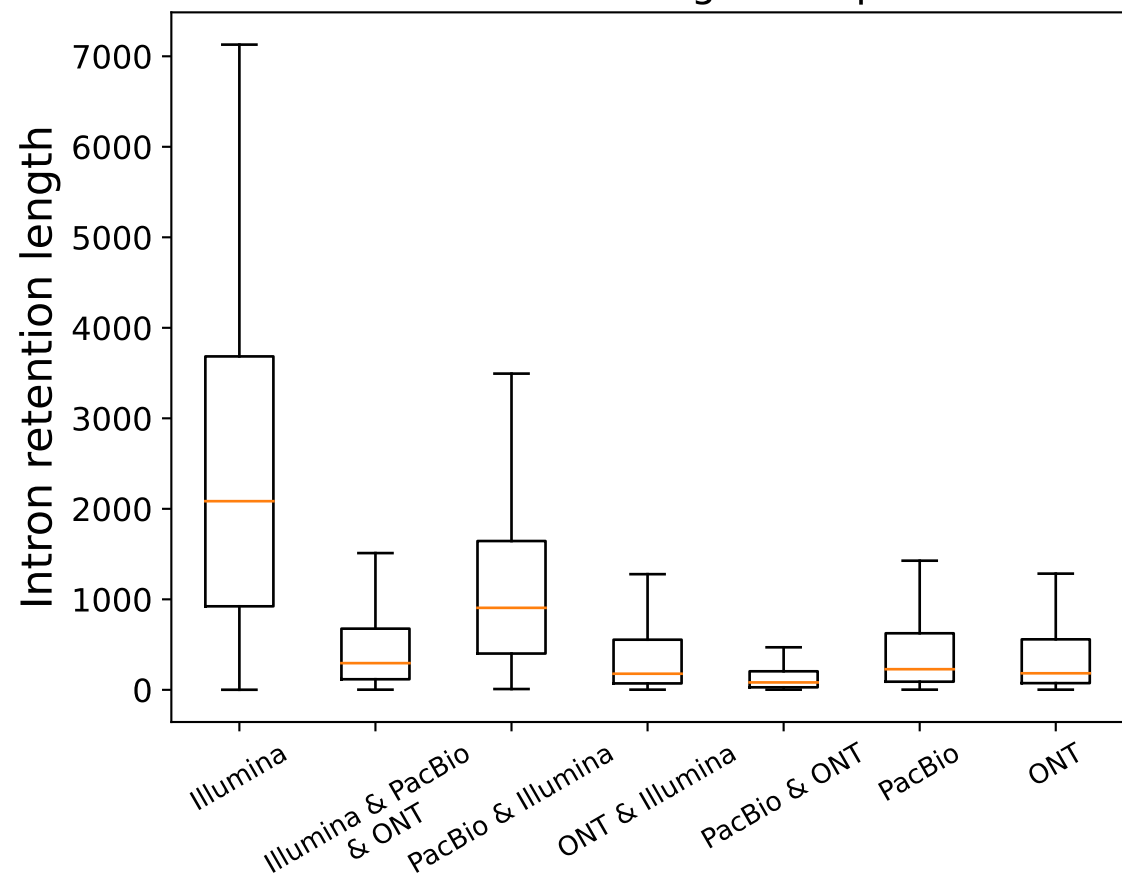

Supplement: Supplemental_code.zip [file Supplemental_Fig_S11A_boxplot_flair.pdf › Supplemental_code/figures/Supplemental_Fig_S11/Supplemental_Fig_S11A_boxplot_flair.pdf]

# Bambu and MAJIQ intron retention

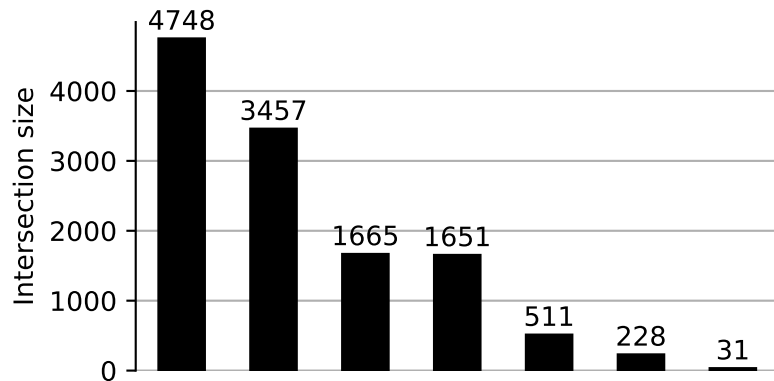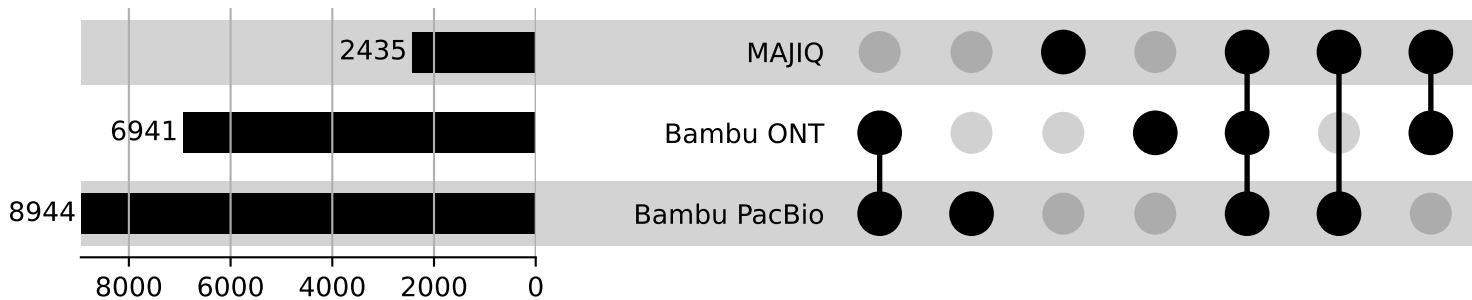

Supplement: Supplemental_code.zip [file Supplemental_Fig_S11A_upset_bambu_ir.pdf › Supplemental_code/figures/Supplemental_Fig_S11/Supplemental_Fig_S11A_upset_bambu_ir.pdf]

# ESPRESSO and MAJIQ intron retention

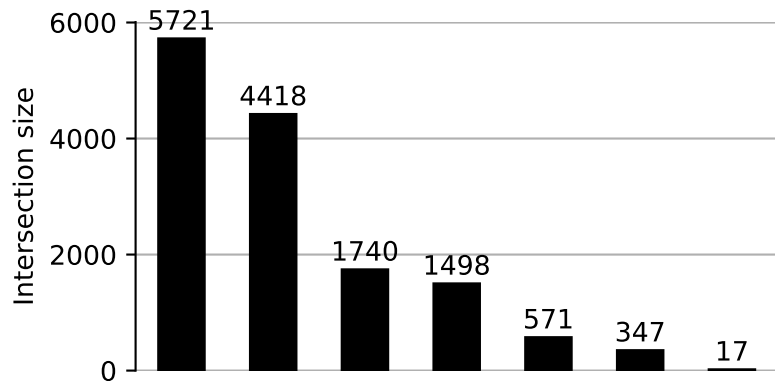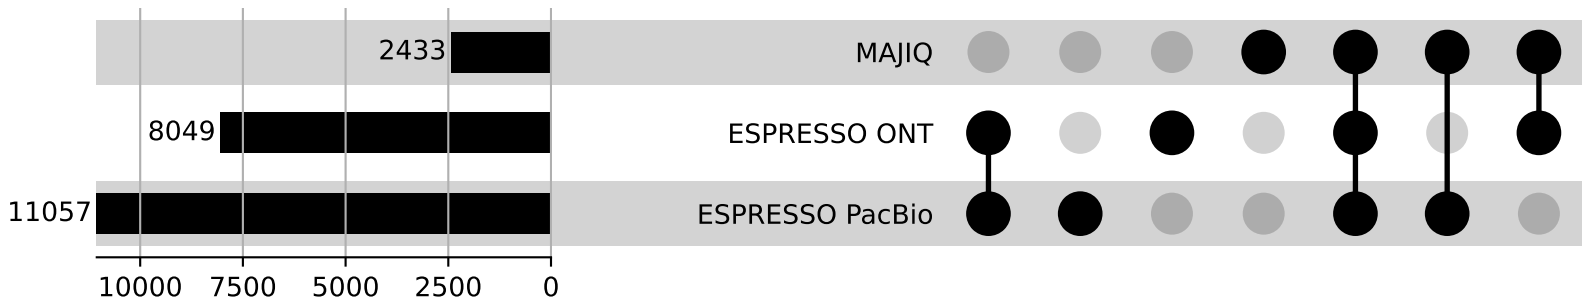

Supplement: Supplemental_code.zip [file Supplemental_Fig_S11A_upset_esp_ir.pdf › Supplemental_code/figures/Supplemental_Fig_S11/Supplemental_Fig_S11A_upset_esp_ir.pdf]

# FLAIR and MAJIQ intron retention

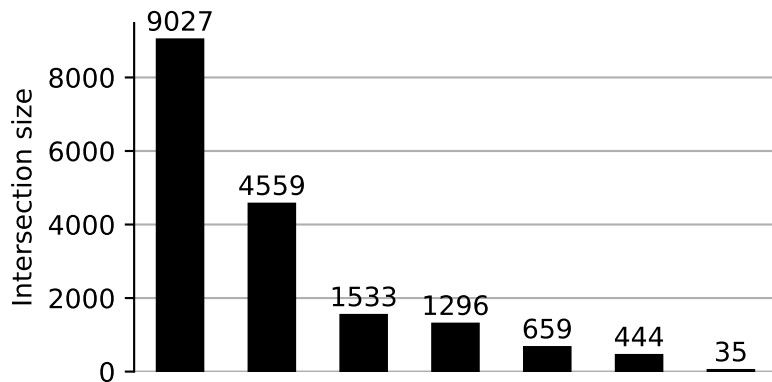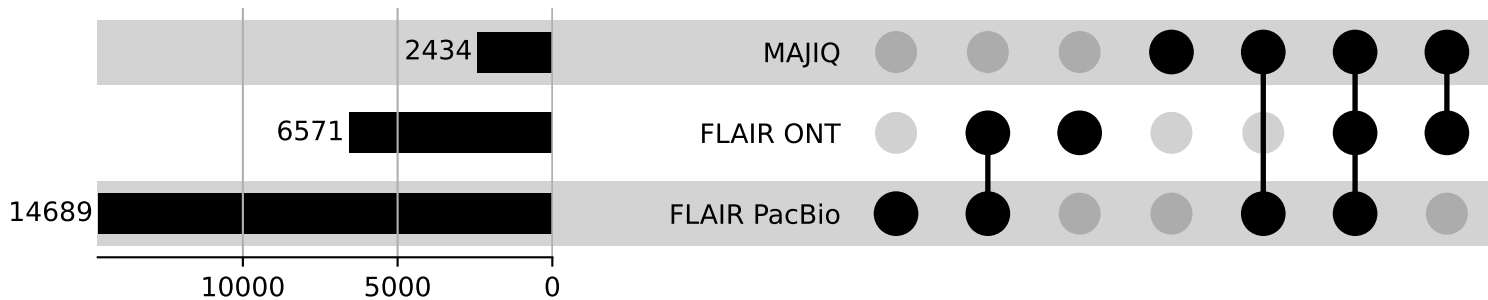

Supplement: Supplemental_code.zip [file Supplemental_Fig_S11A_upset_flair_ir.pdf › Supplemental_code/figures/Supplemental_Fig_S11/Supplemental_Fig_S11A_upset_flair_ir.pdf]

GTEX Brain frontal cortex  
FLAIR and MAJIQ intron retention length comparison

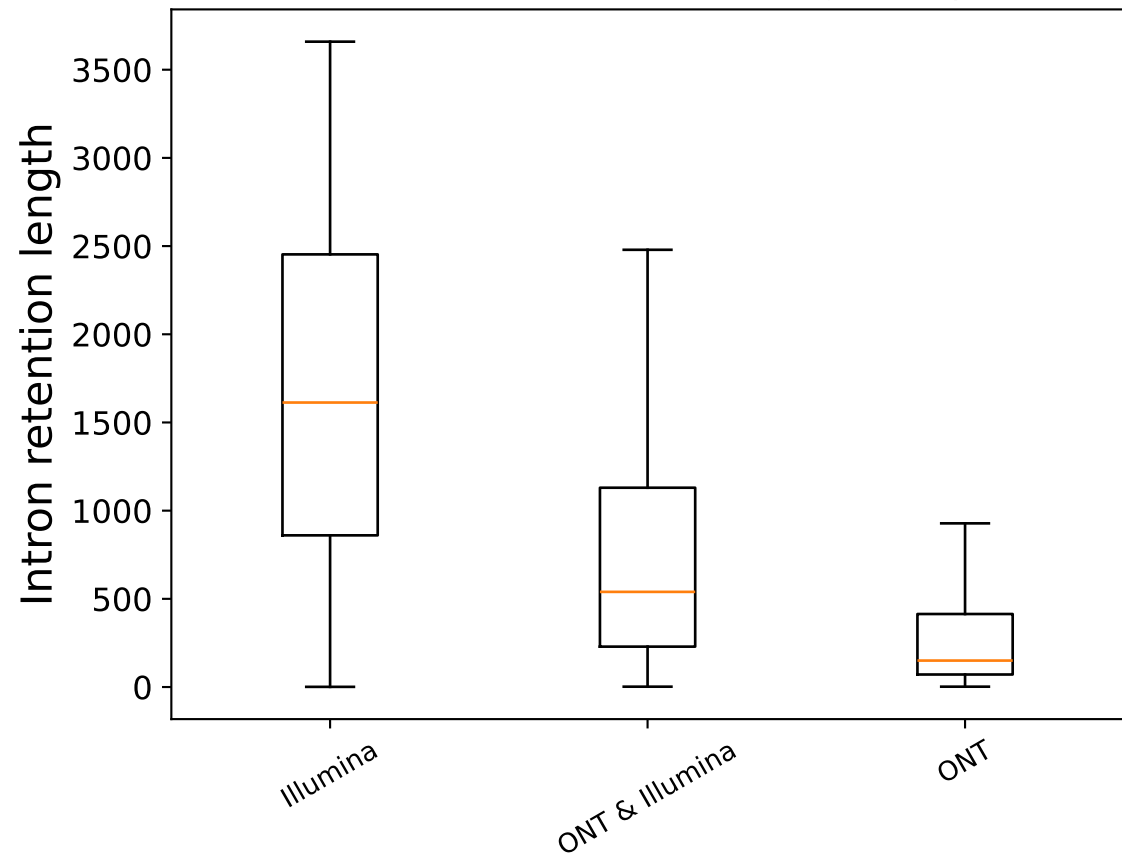

Supplement: Supplemental_code.zip [file Supplemental_Fig_S11B_boxplot_brain.pdf › Supplemental_code/figures/Supplemental_Fig_S11/Supplemental_Fig_S11B_boxplot_brain.pdf]

GTEX Heart atrial appendage  
FLAIR and MAJIQ intron retention length comparison

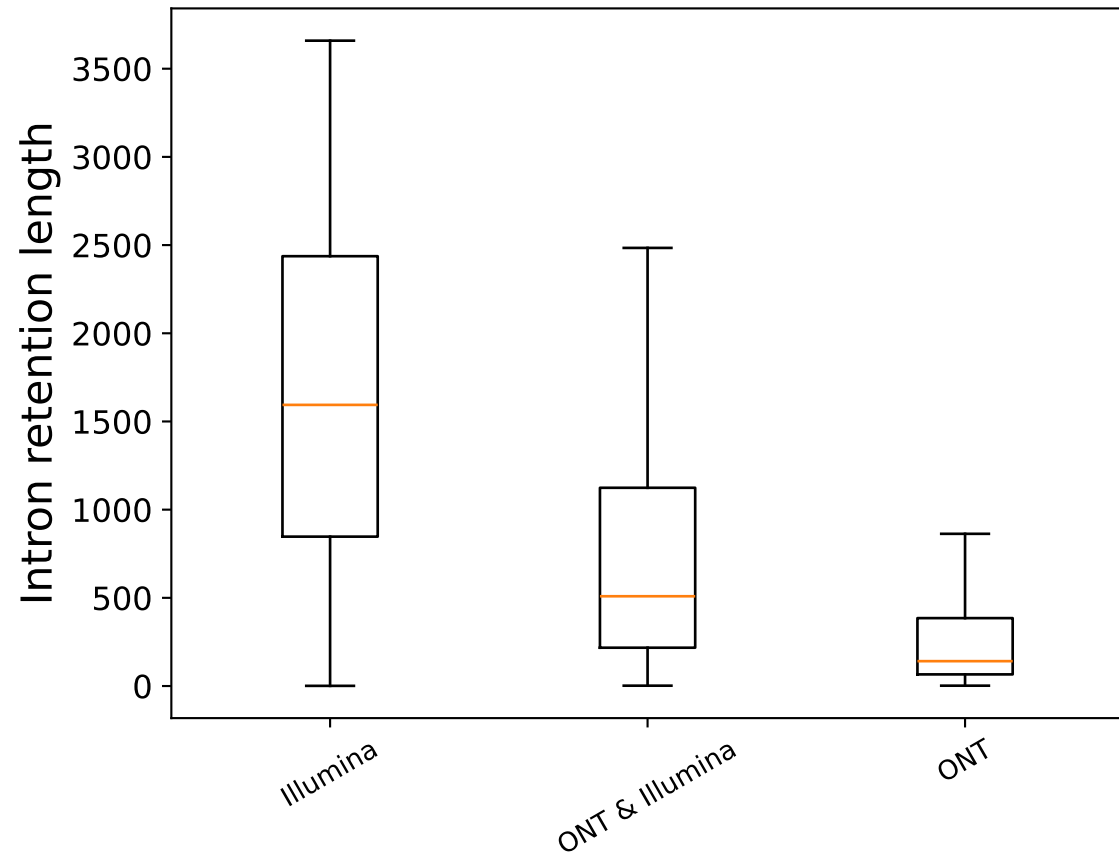

Supplement: Supplemental_code.zip [file Supplemental_Fig_S11B_boxplot_heart.pdf › Supplemental_code/figures/Supplemental_Fig_S11/Supplemental_Fig_S11B_boxplot_heart.pdf]

GTEX Liver  
FLAIR and MAJIQ intron retention length comparison

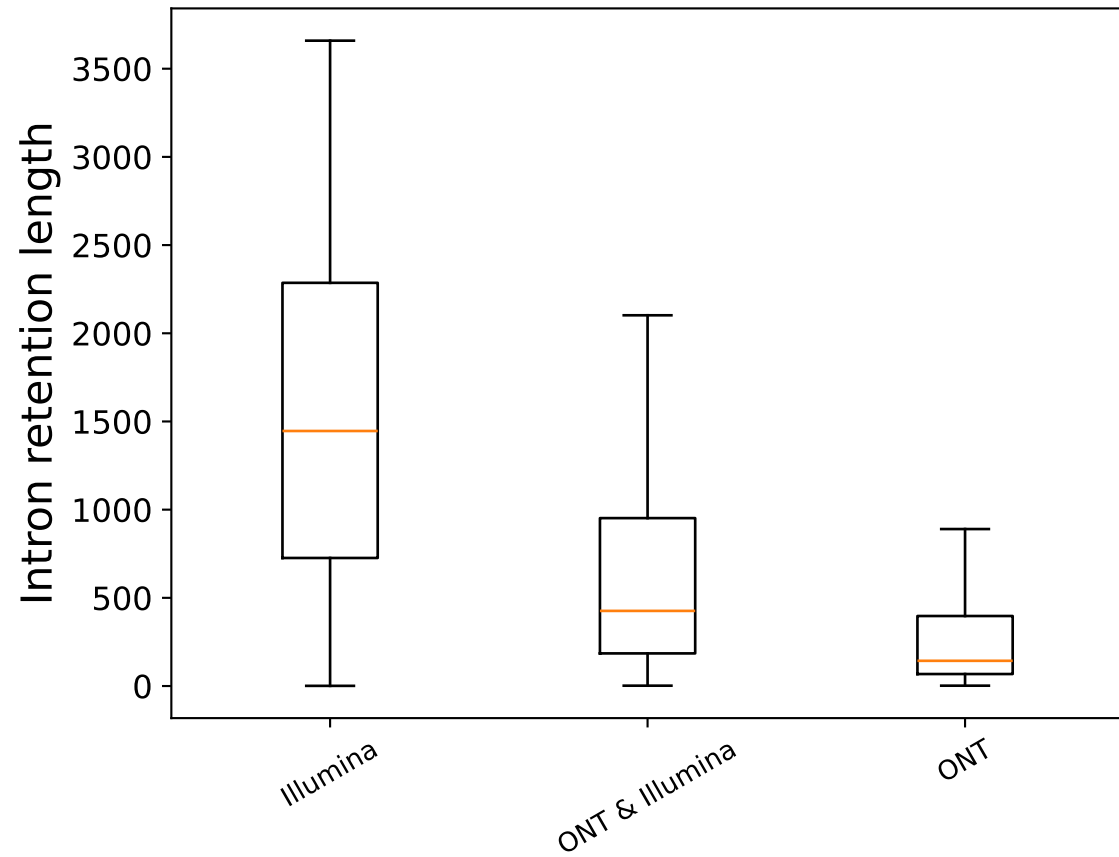

Supplement: Supplemental_code.zip [file Supplemental_Fig_S11B_boxplot_live.pdf › Supplemental_code/figures/Supplemental_Fig_S11/Supplemental_Fig_S11B_boxplot_live.pdf]

# GTEX Brain frontal cortex FLAIR and MAJIQ intron retention

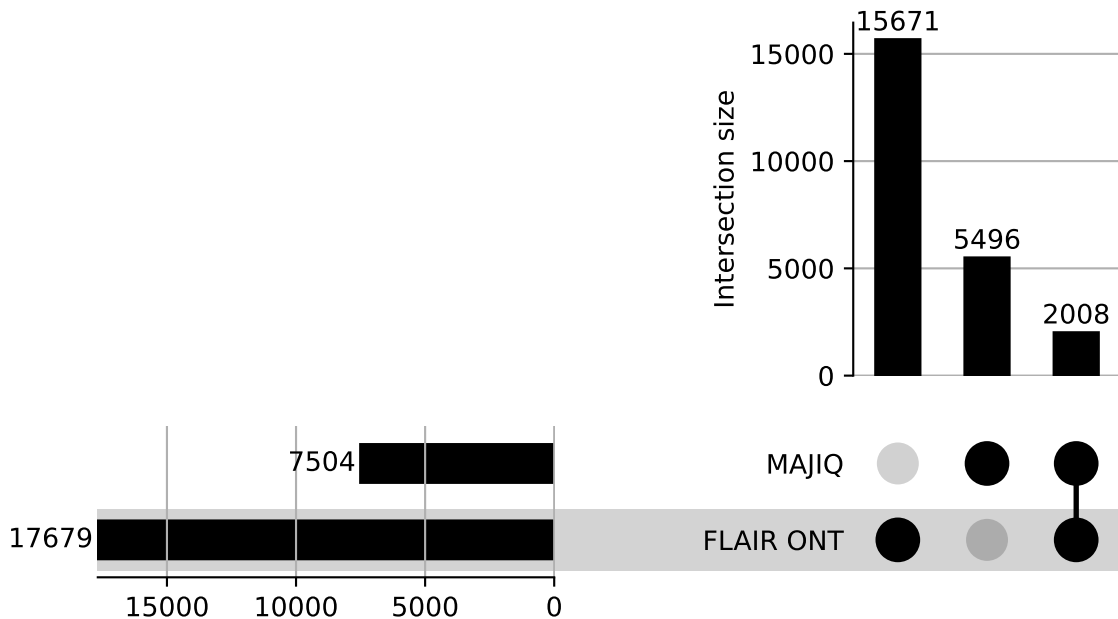

Supplement: Supplemental_code.zip [file Supplemental_Fig_S11B_upset_brain_ir.pdf › Supplemental_code/figures/Supplemental_Fig_S11/Supplemental_Fig_S11B_upset_brain_ir.pdf]

# GTEx Heart atrial appendage FLAIR and MAJIQ intron retention

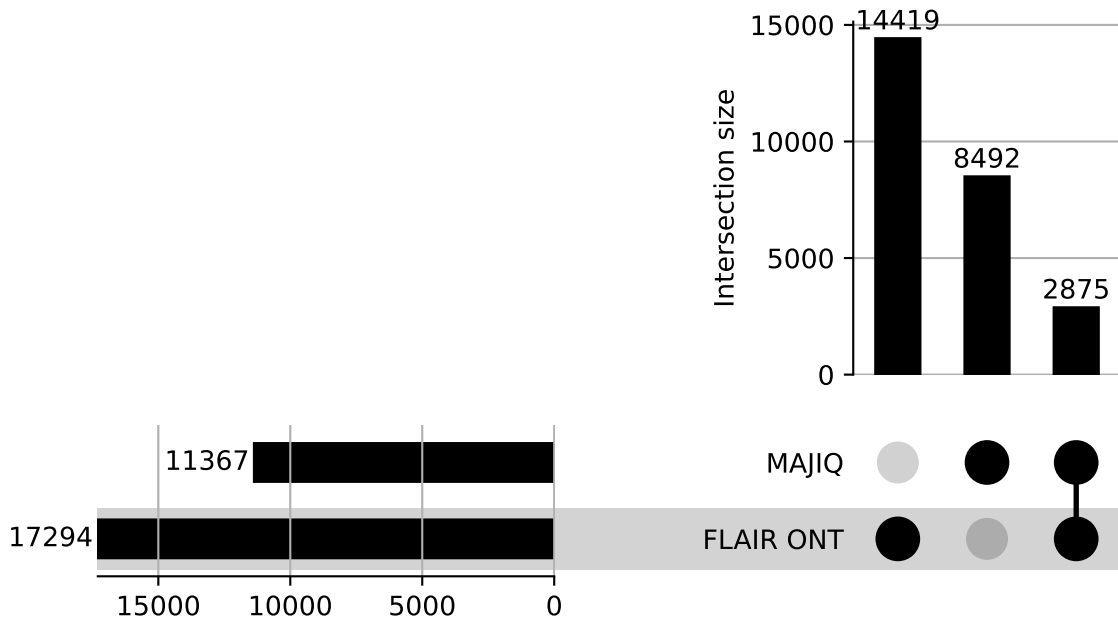

Supplement: Supplemental_code.zip [file Supplemental_Fig_S11B_upset_heart_ir.pdf › Supplemental_code/figures/Supplemental_Fig_S11/Supplemental_Fig_S11B_upset_heart_ir.pdf]

# GTEX Liver

## FLAIR and MAJIQ intron retention

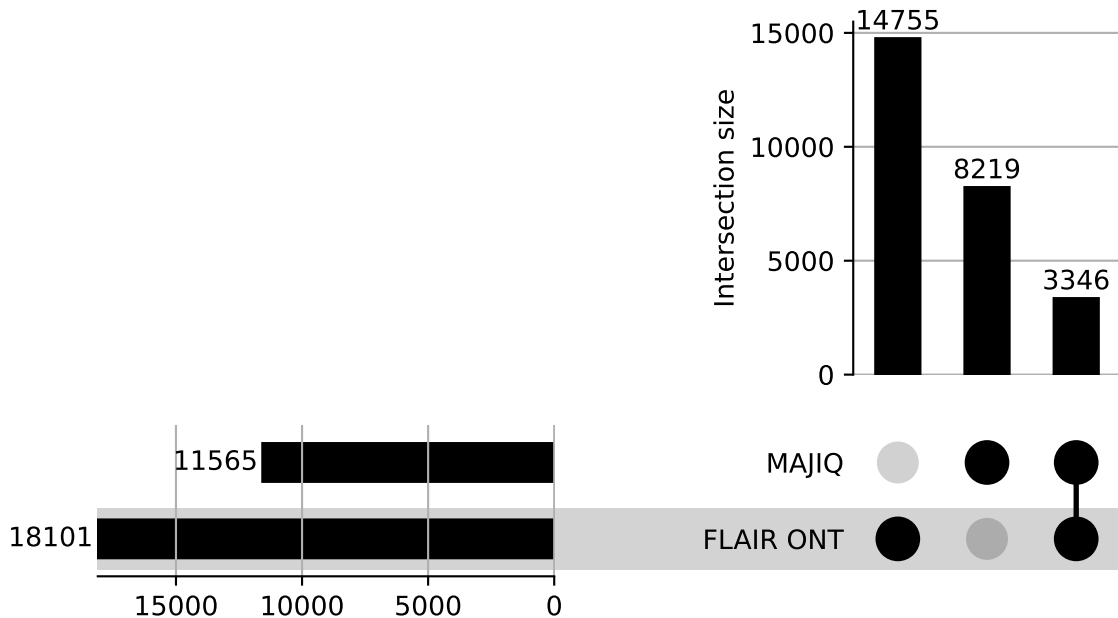

Supplement: Supplemental_code.zip [file Supplemental_Fig_S11B_upset_liver_ir (1).pdf › Supplemental_code/figures/Supplemental_Fig_S11/Supplemental_Fig_S11B_upset_liver_ir (1).pdf]

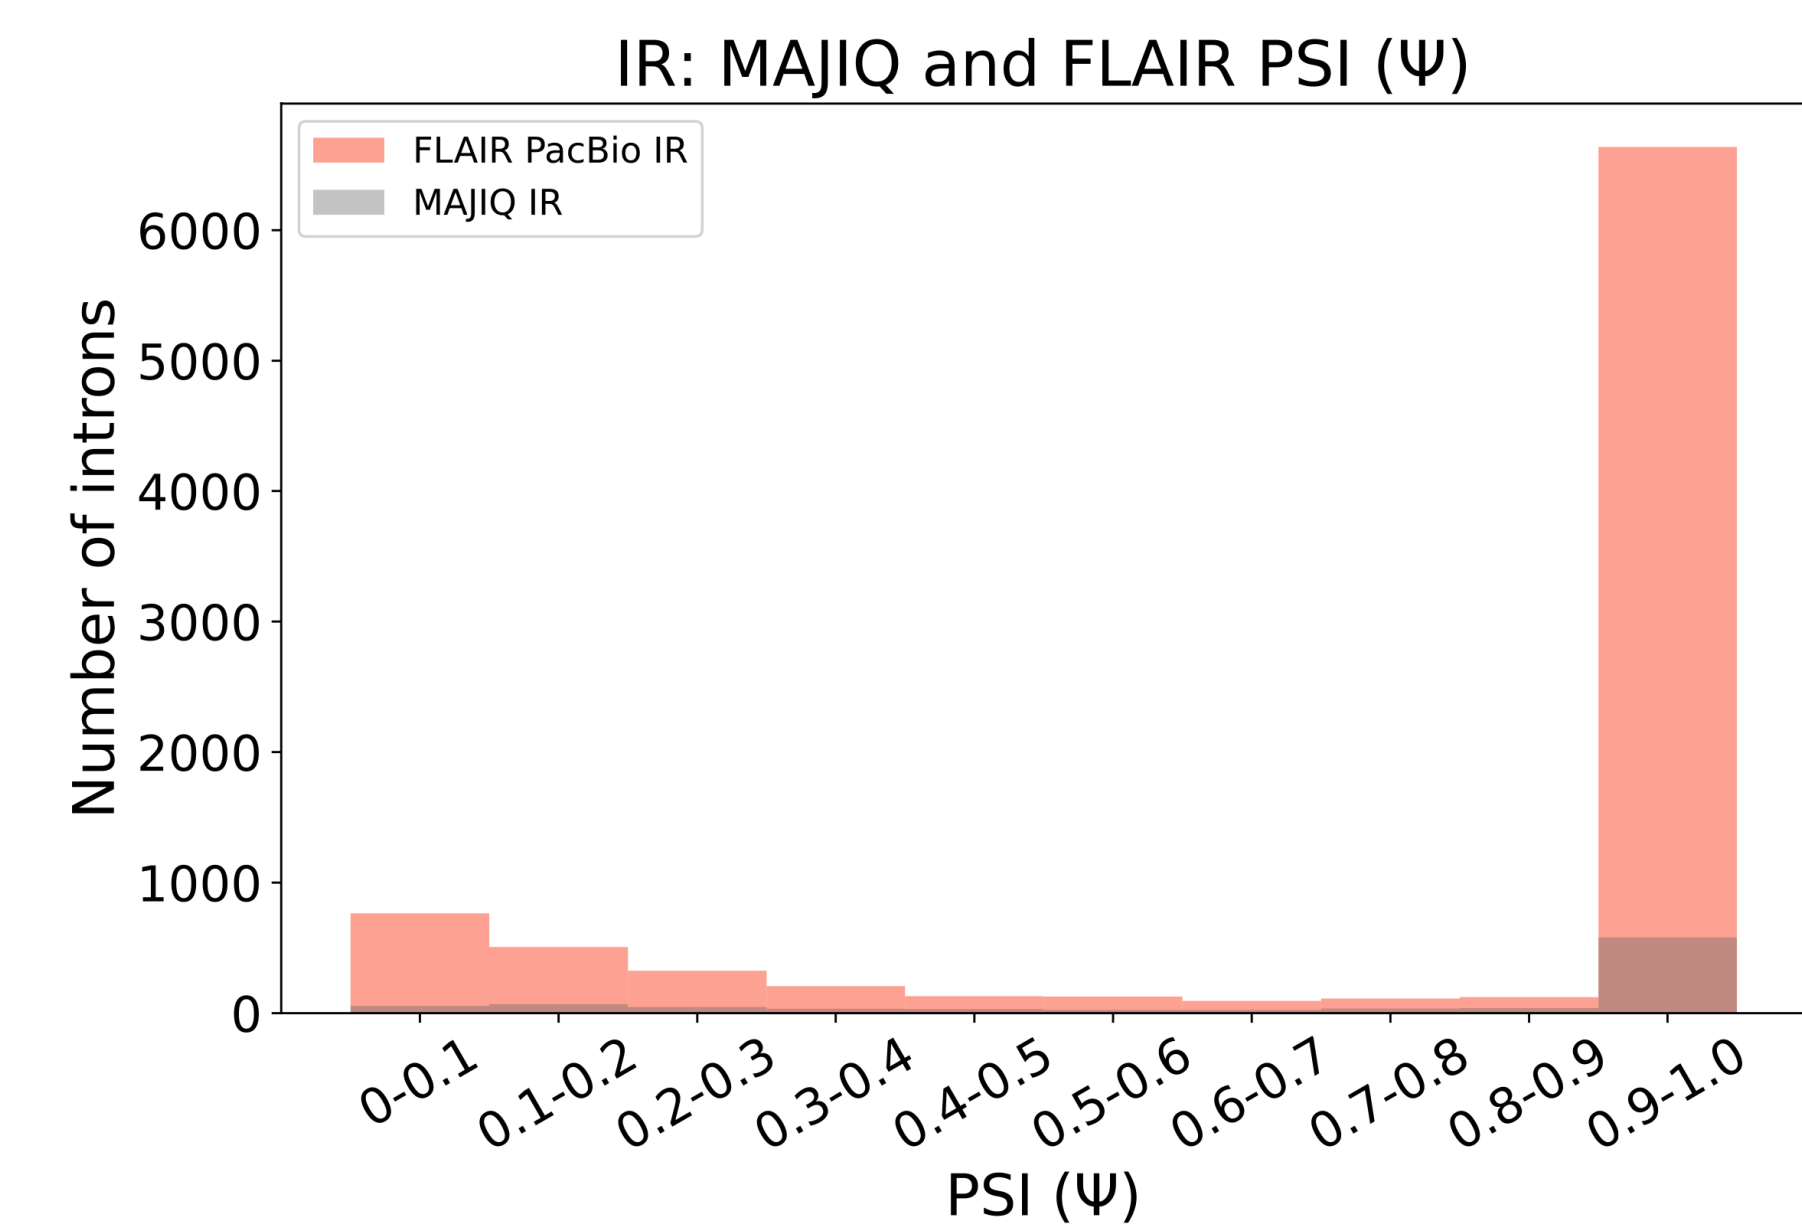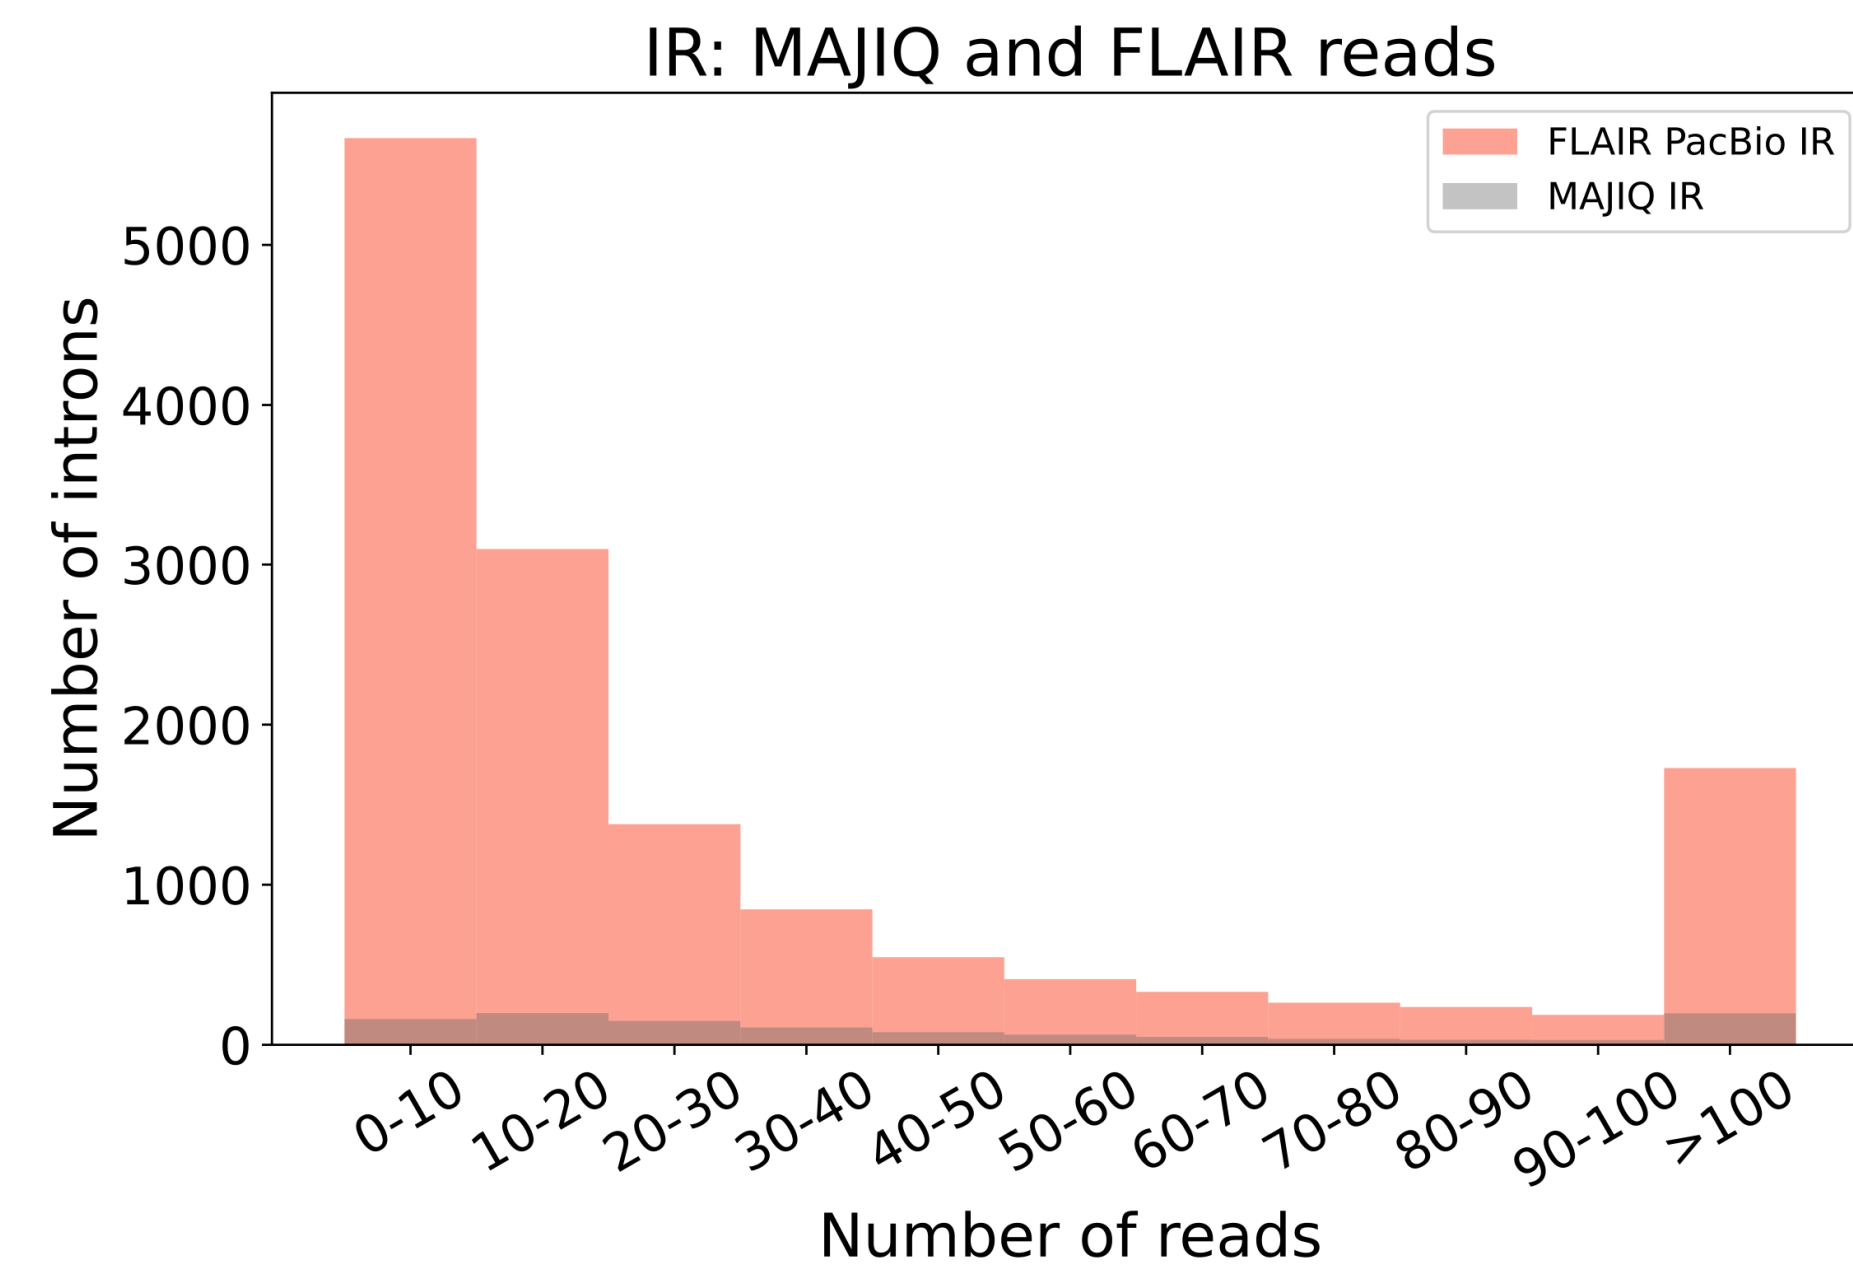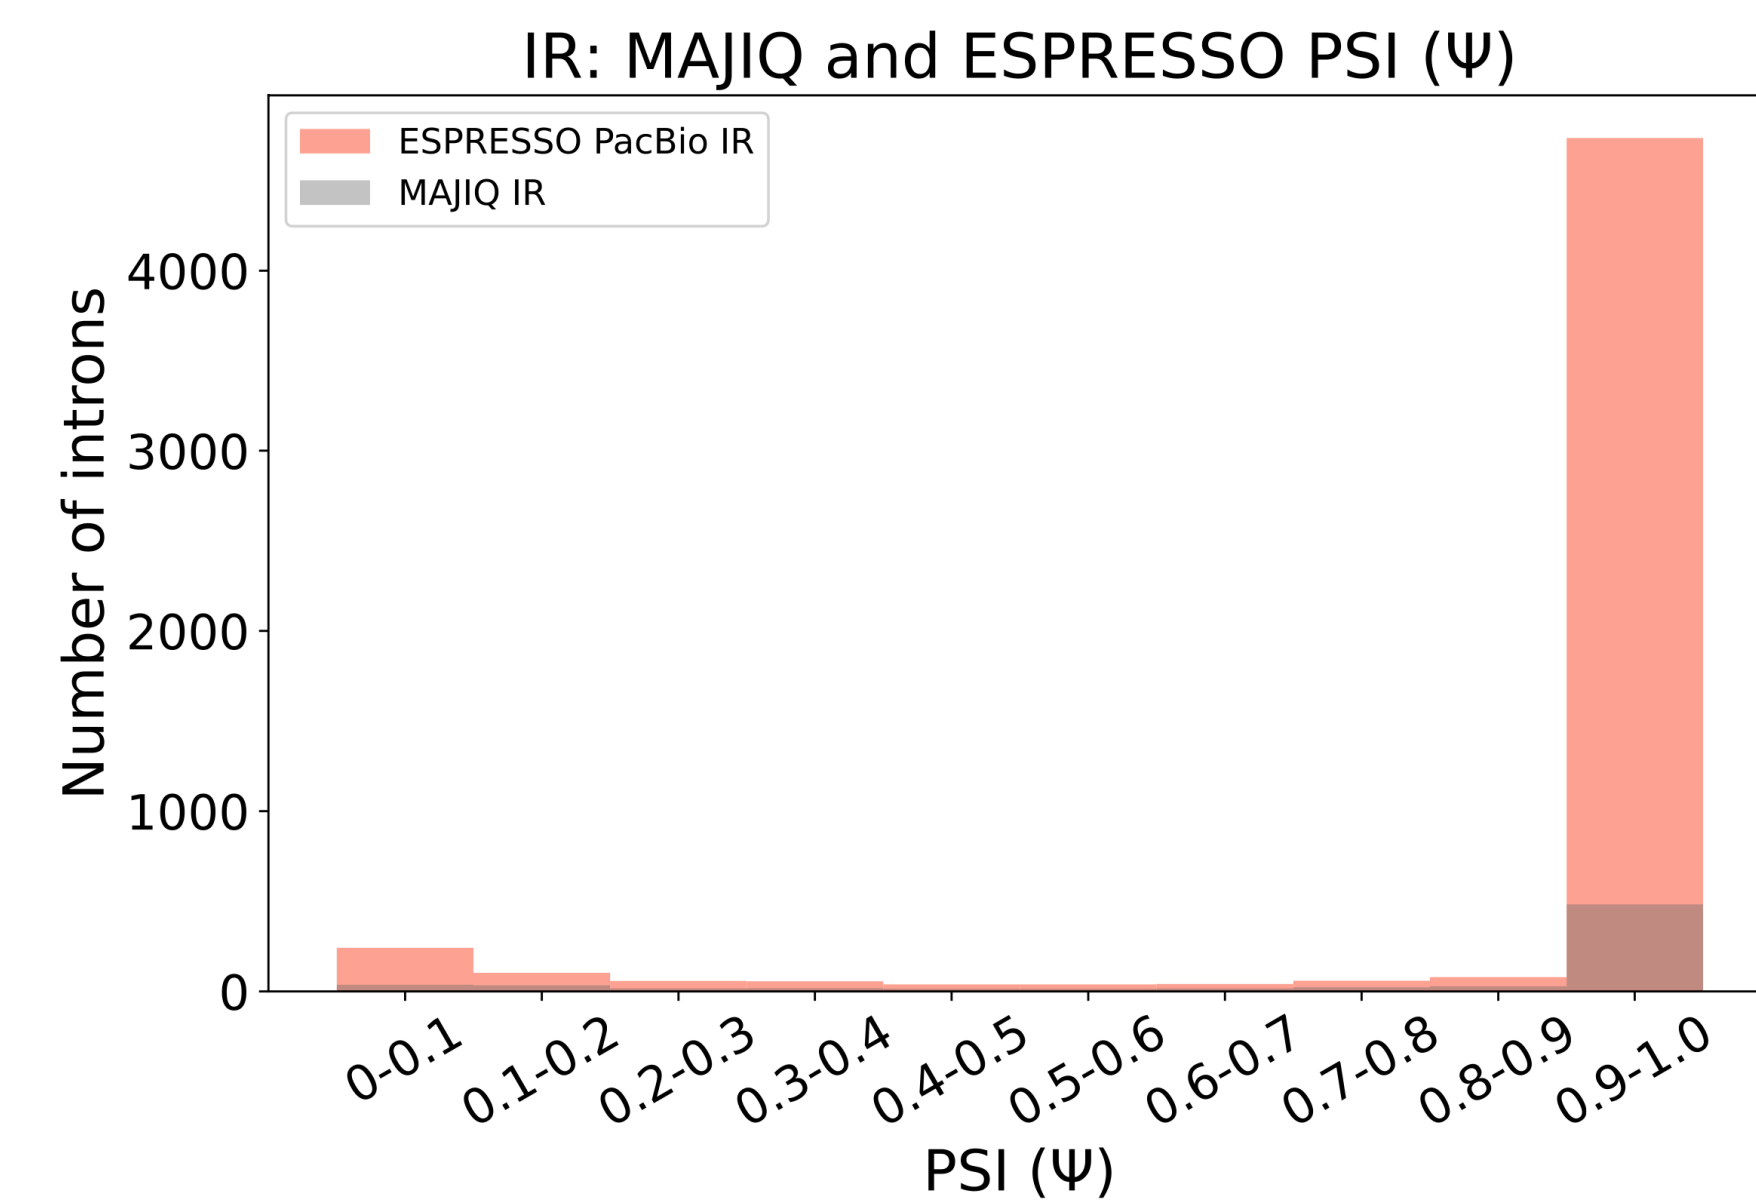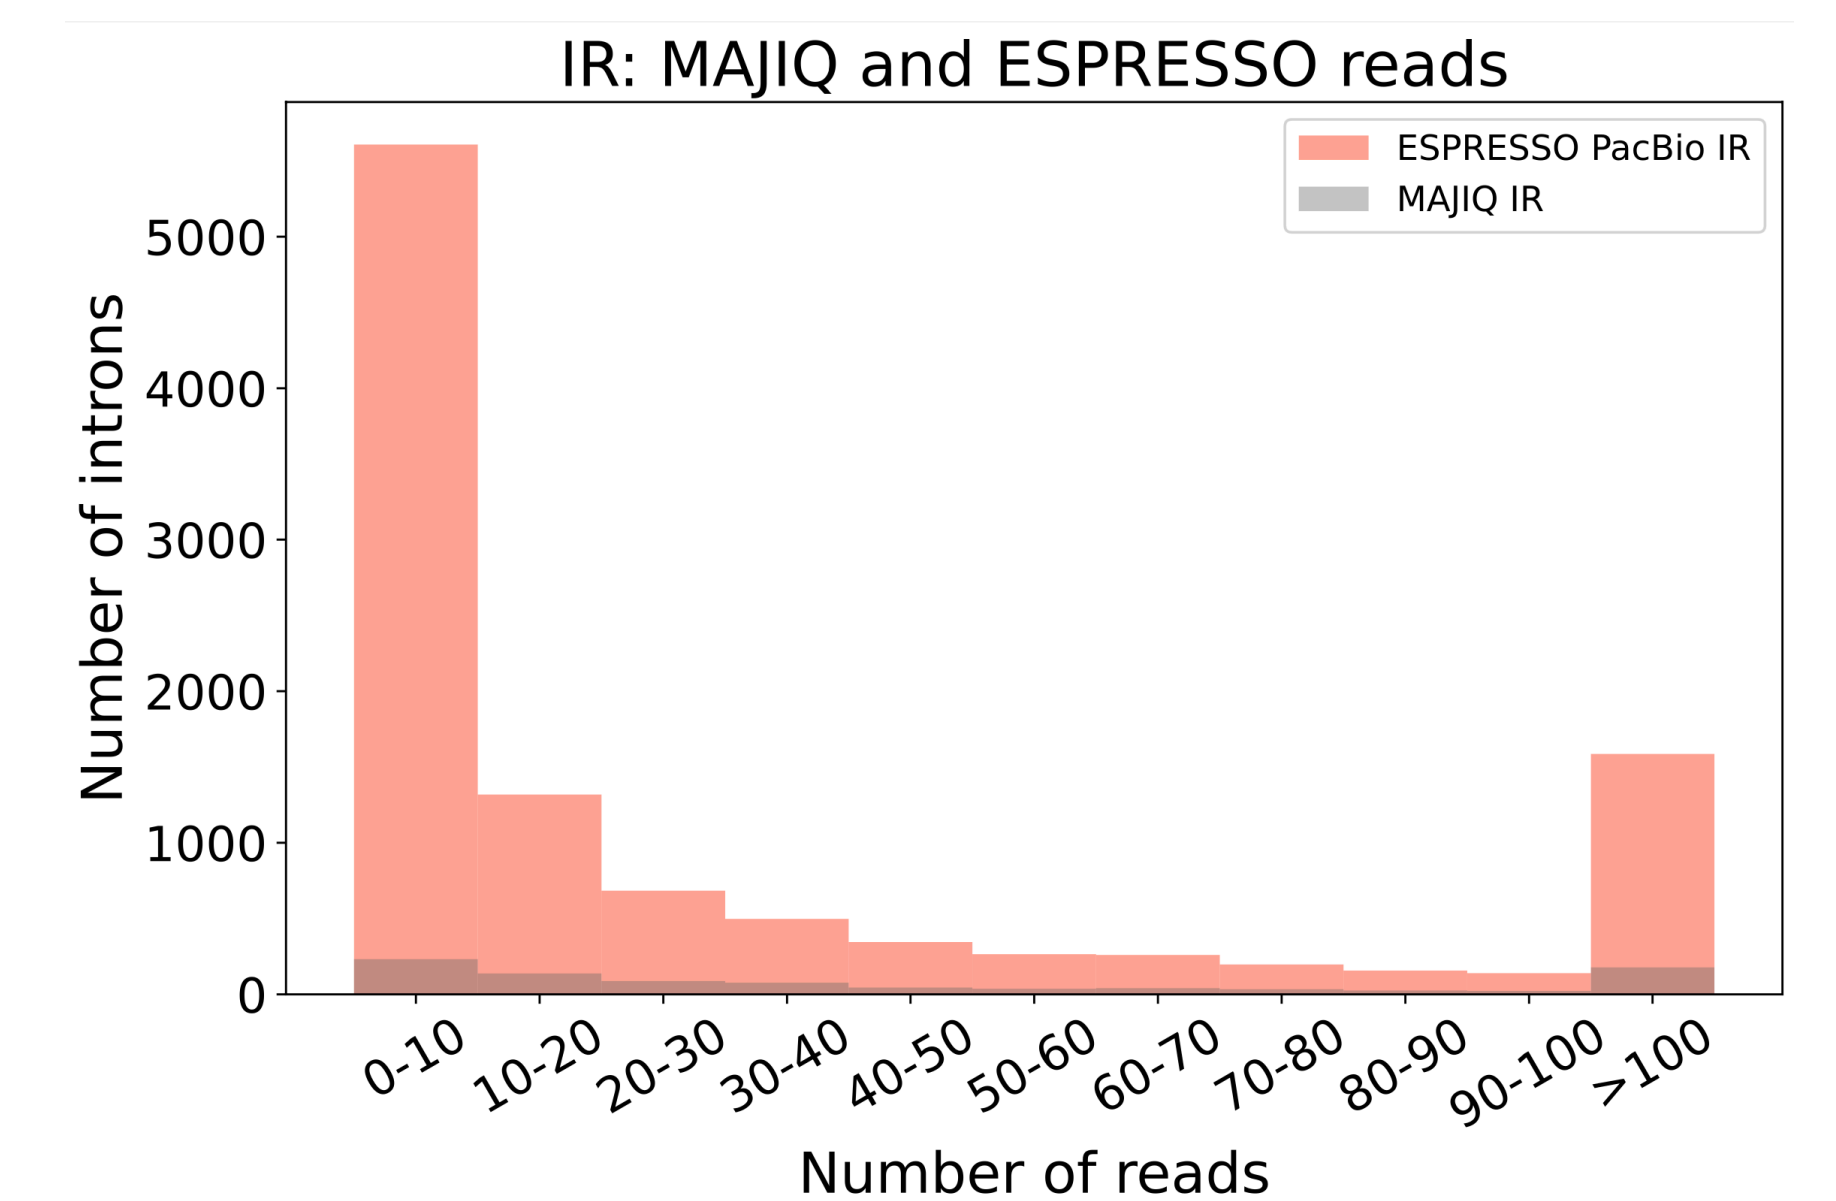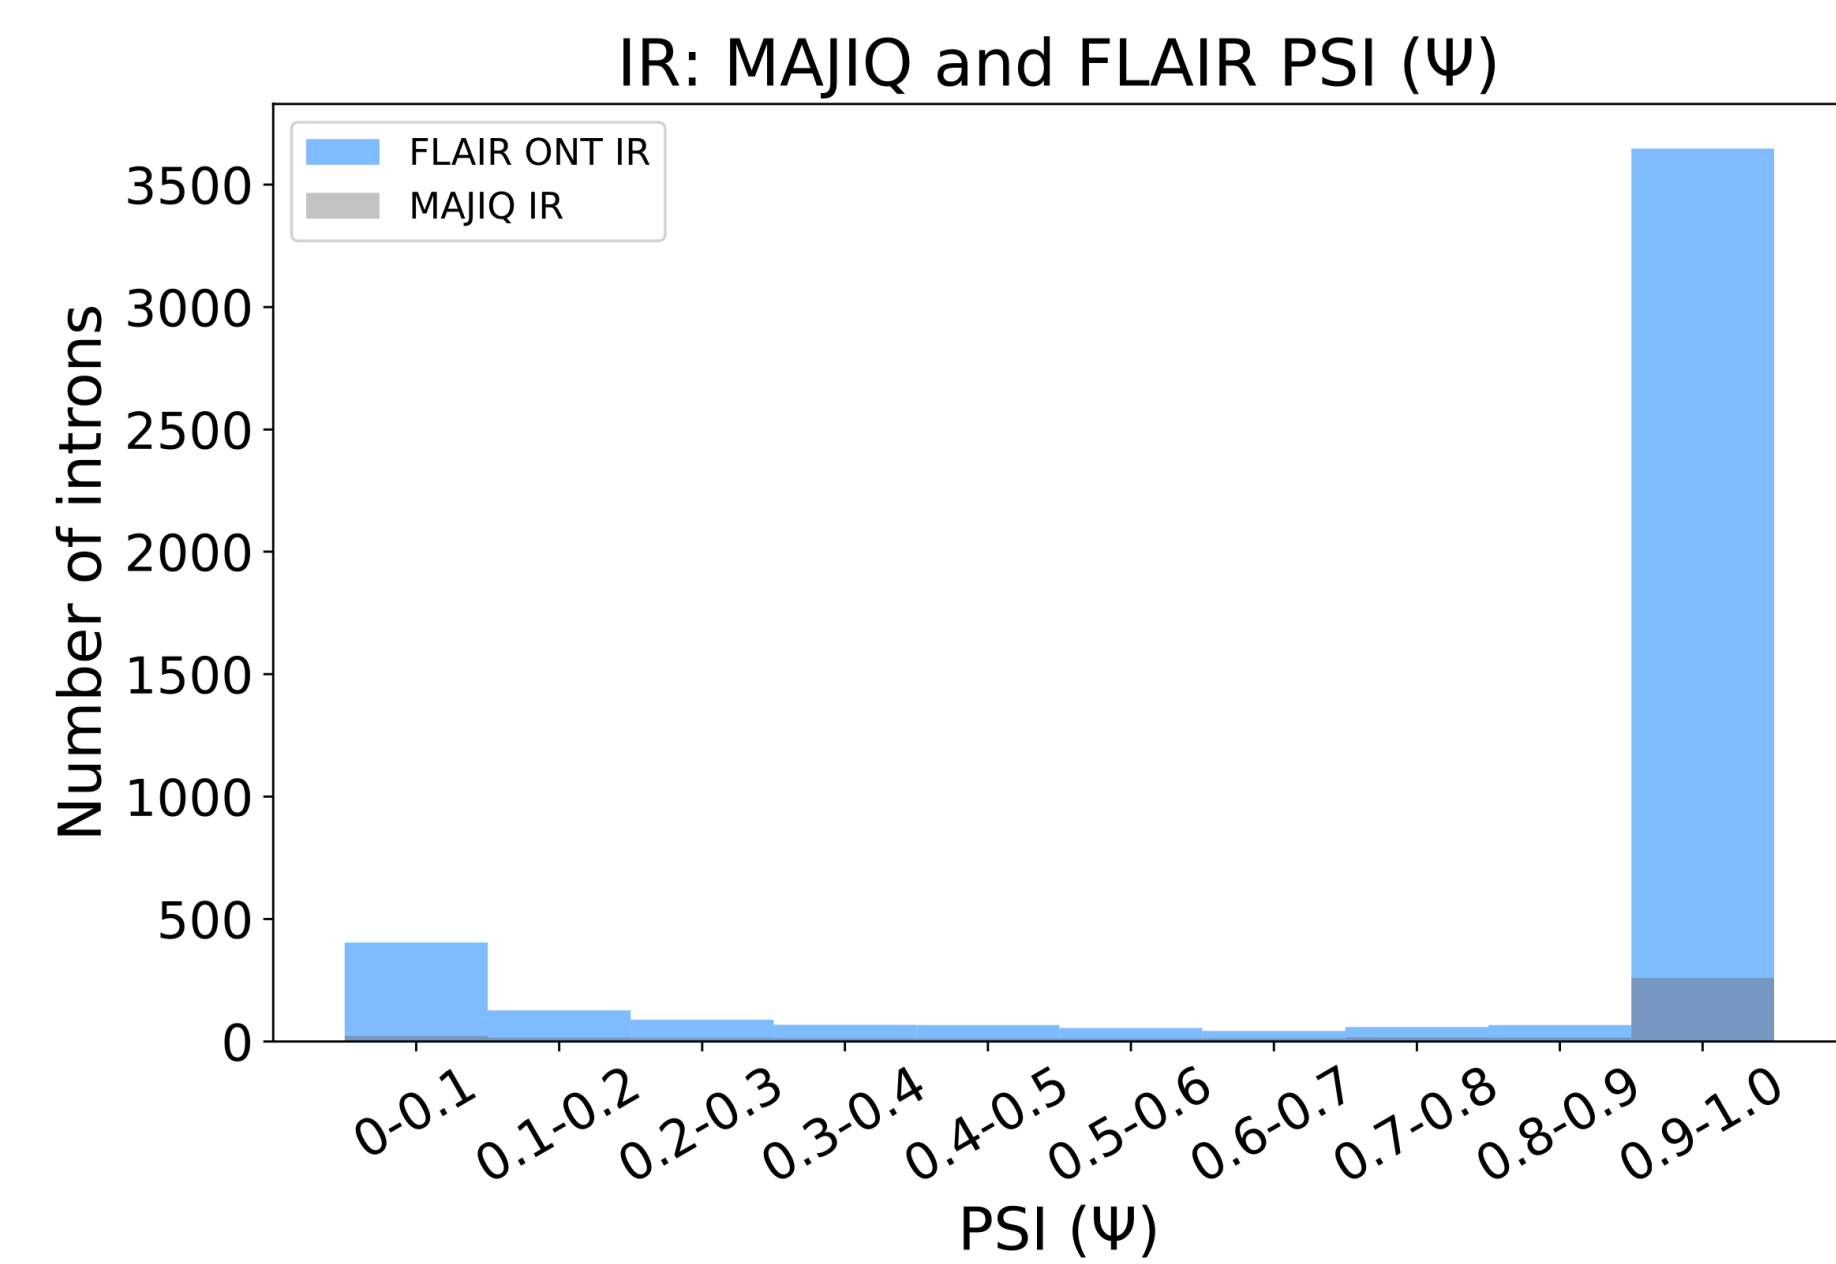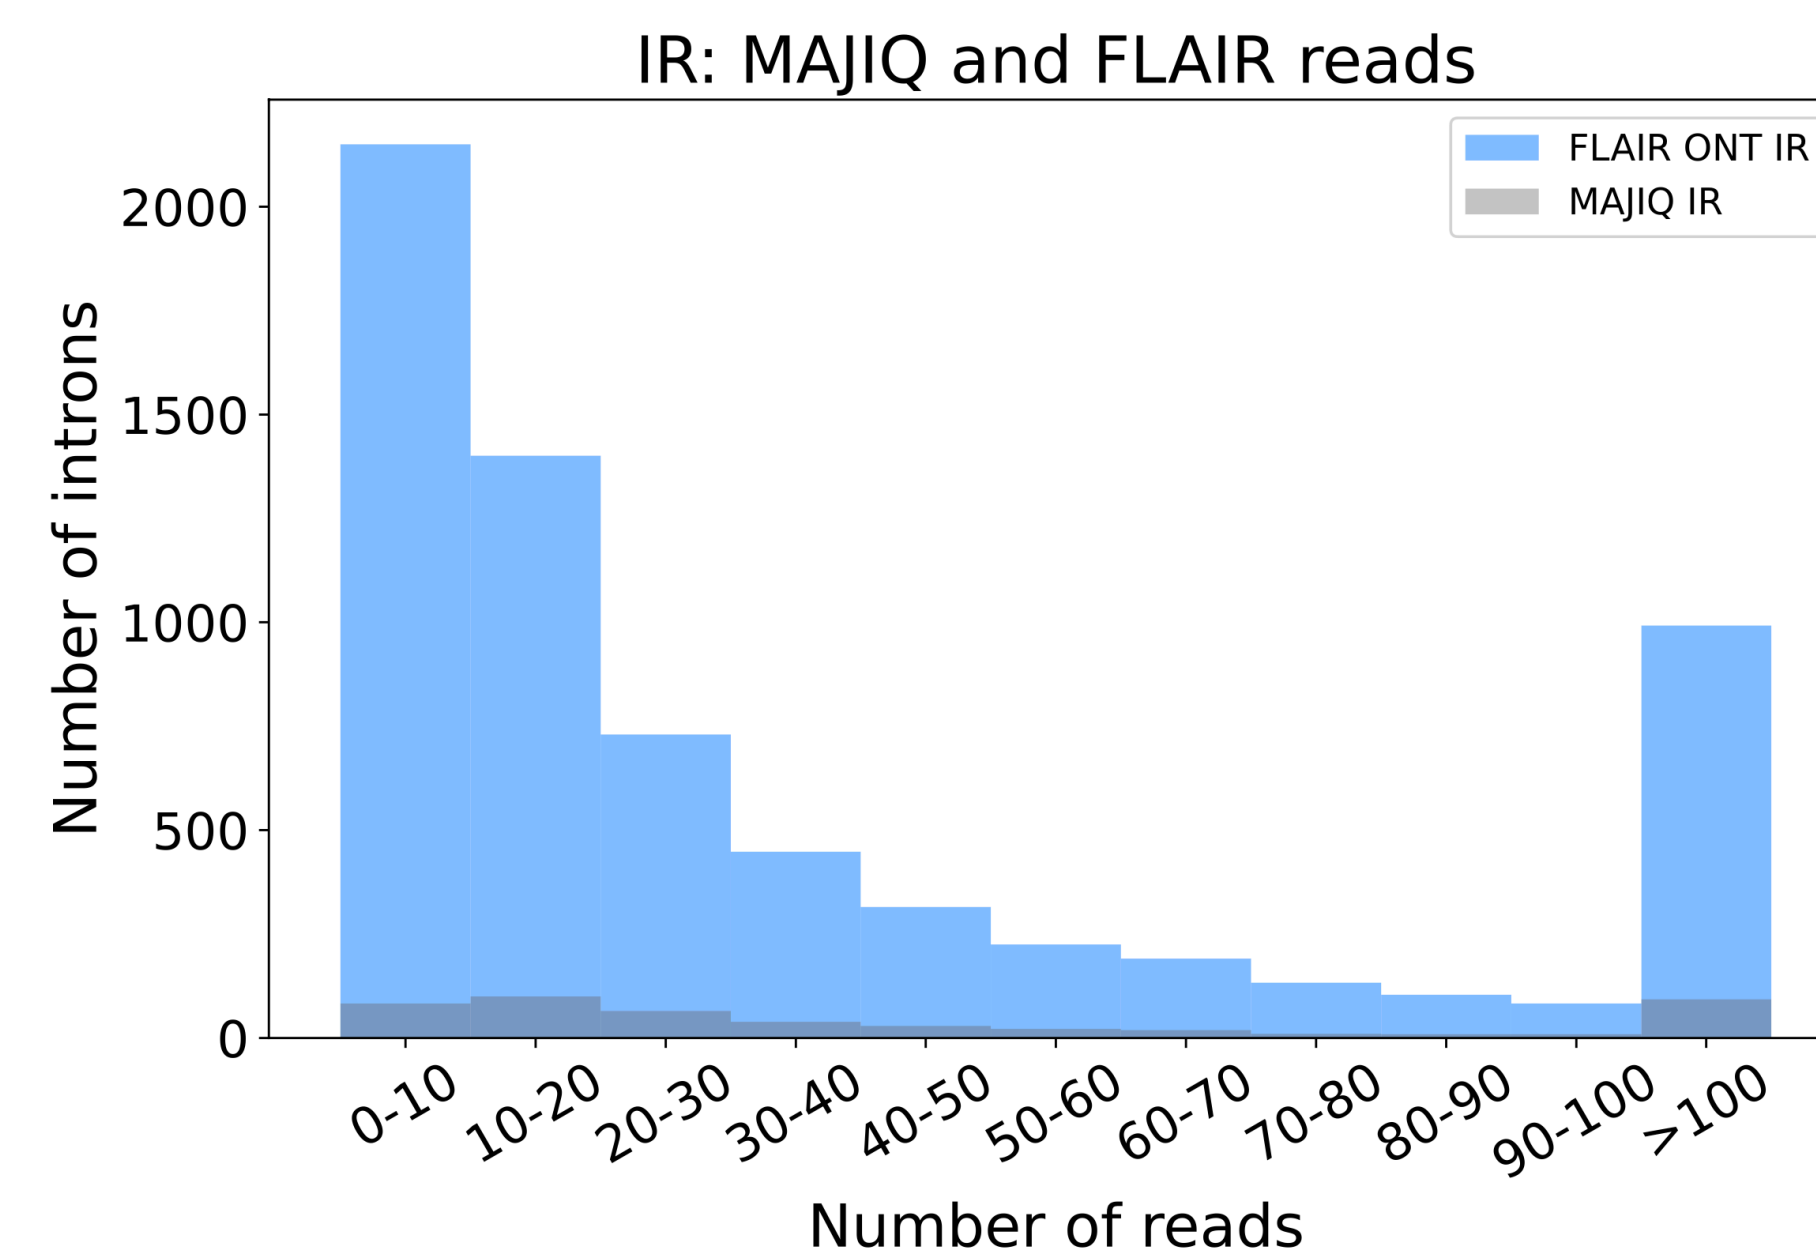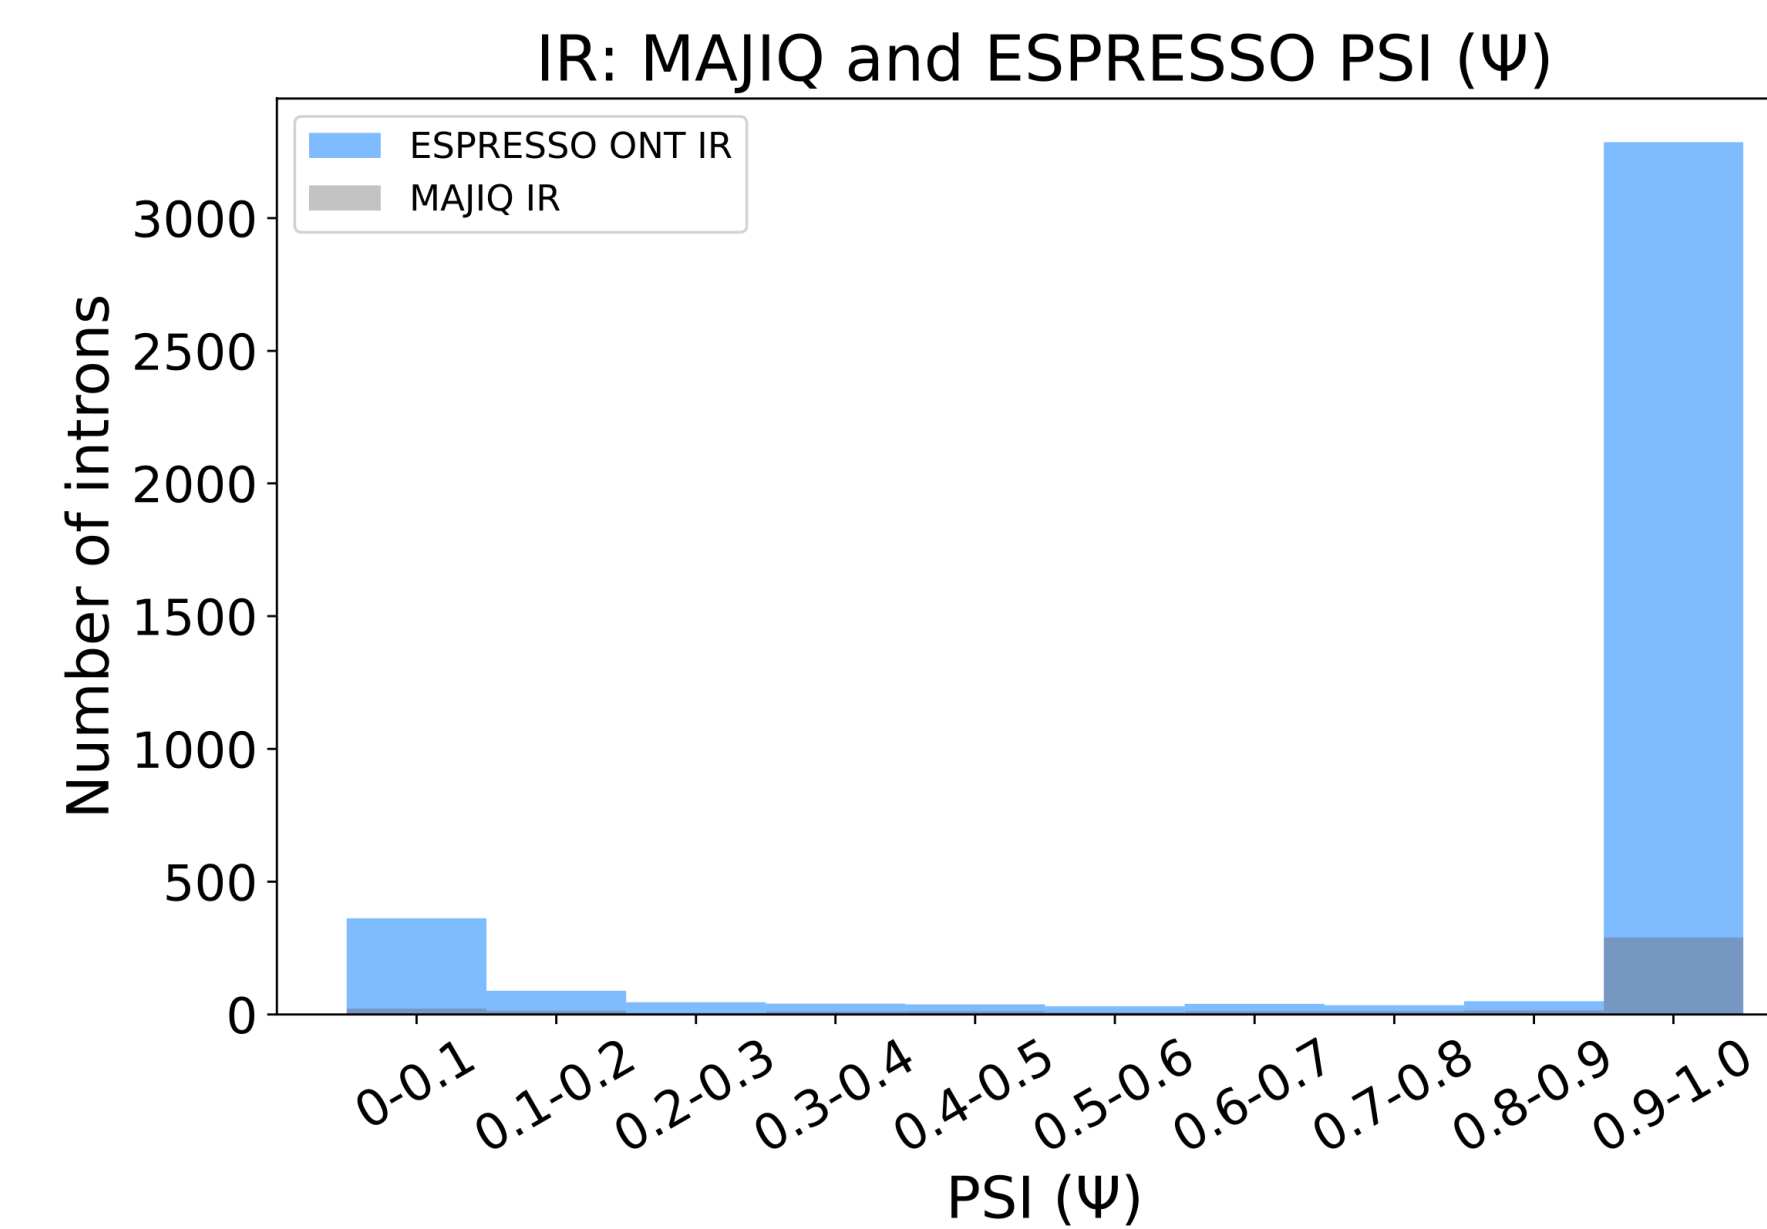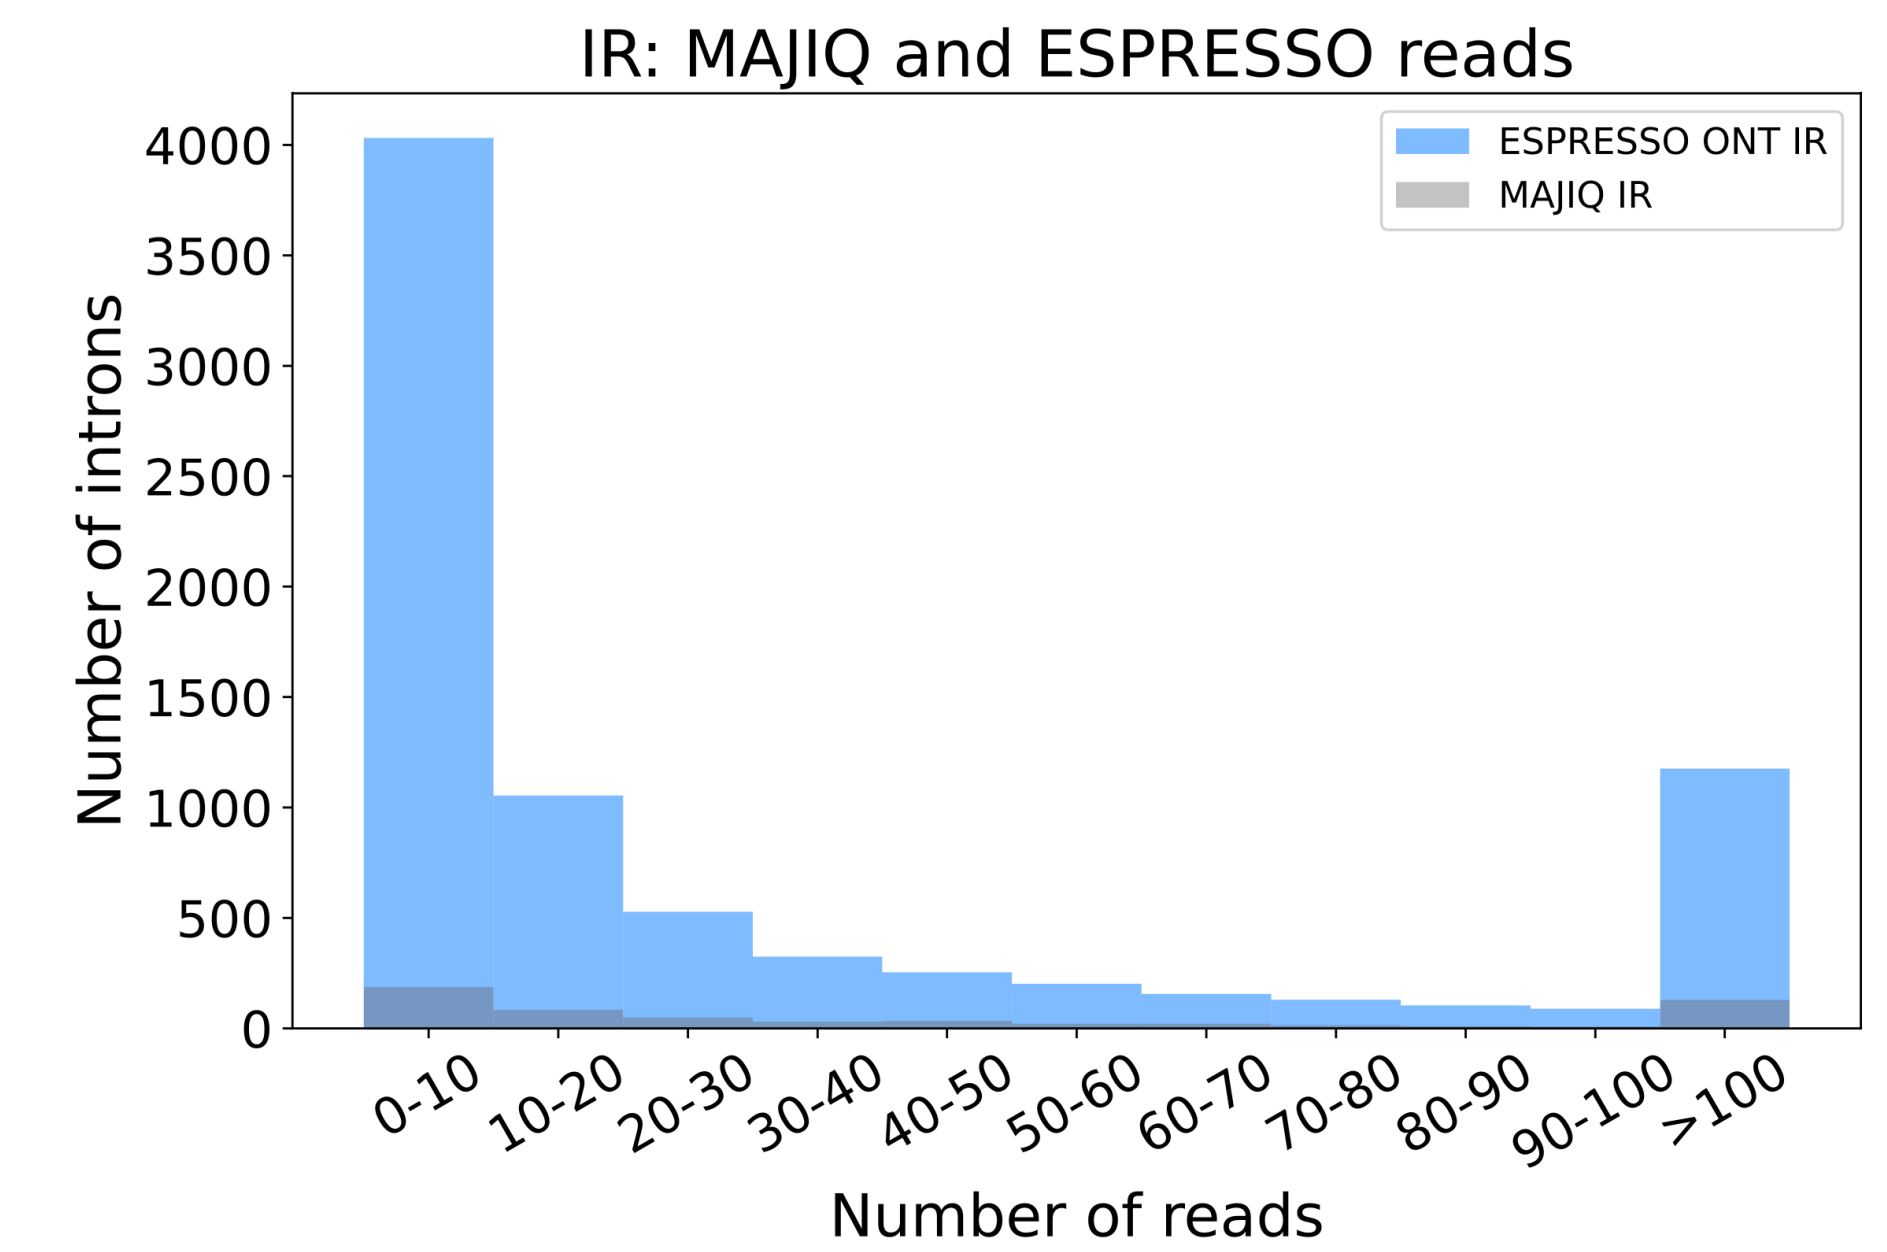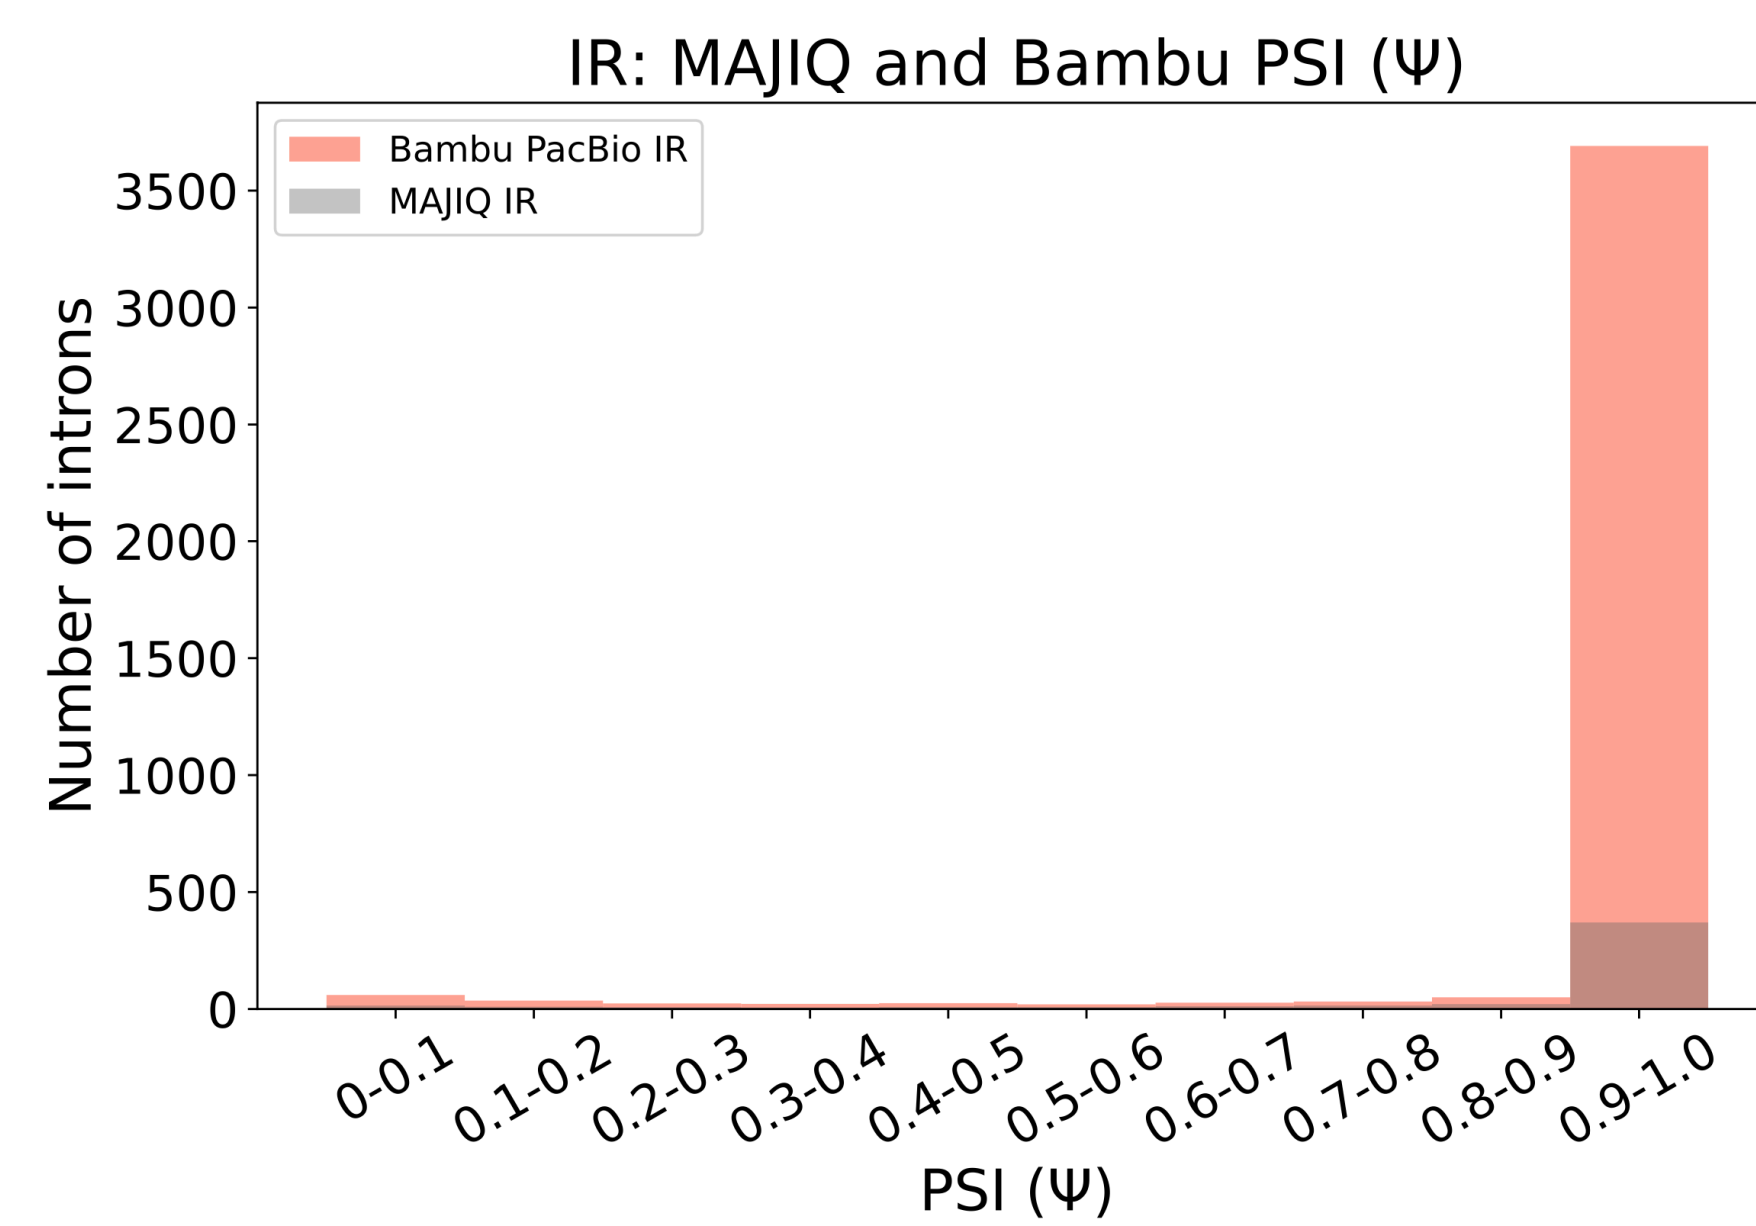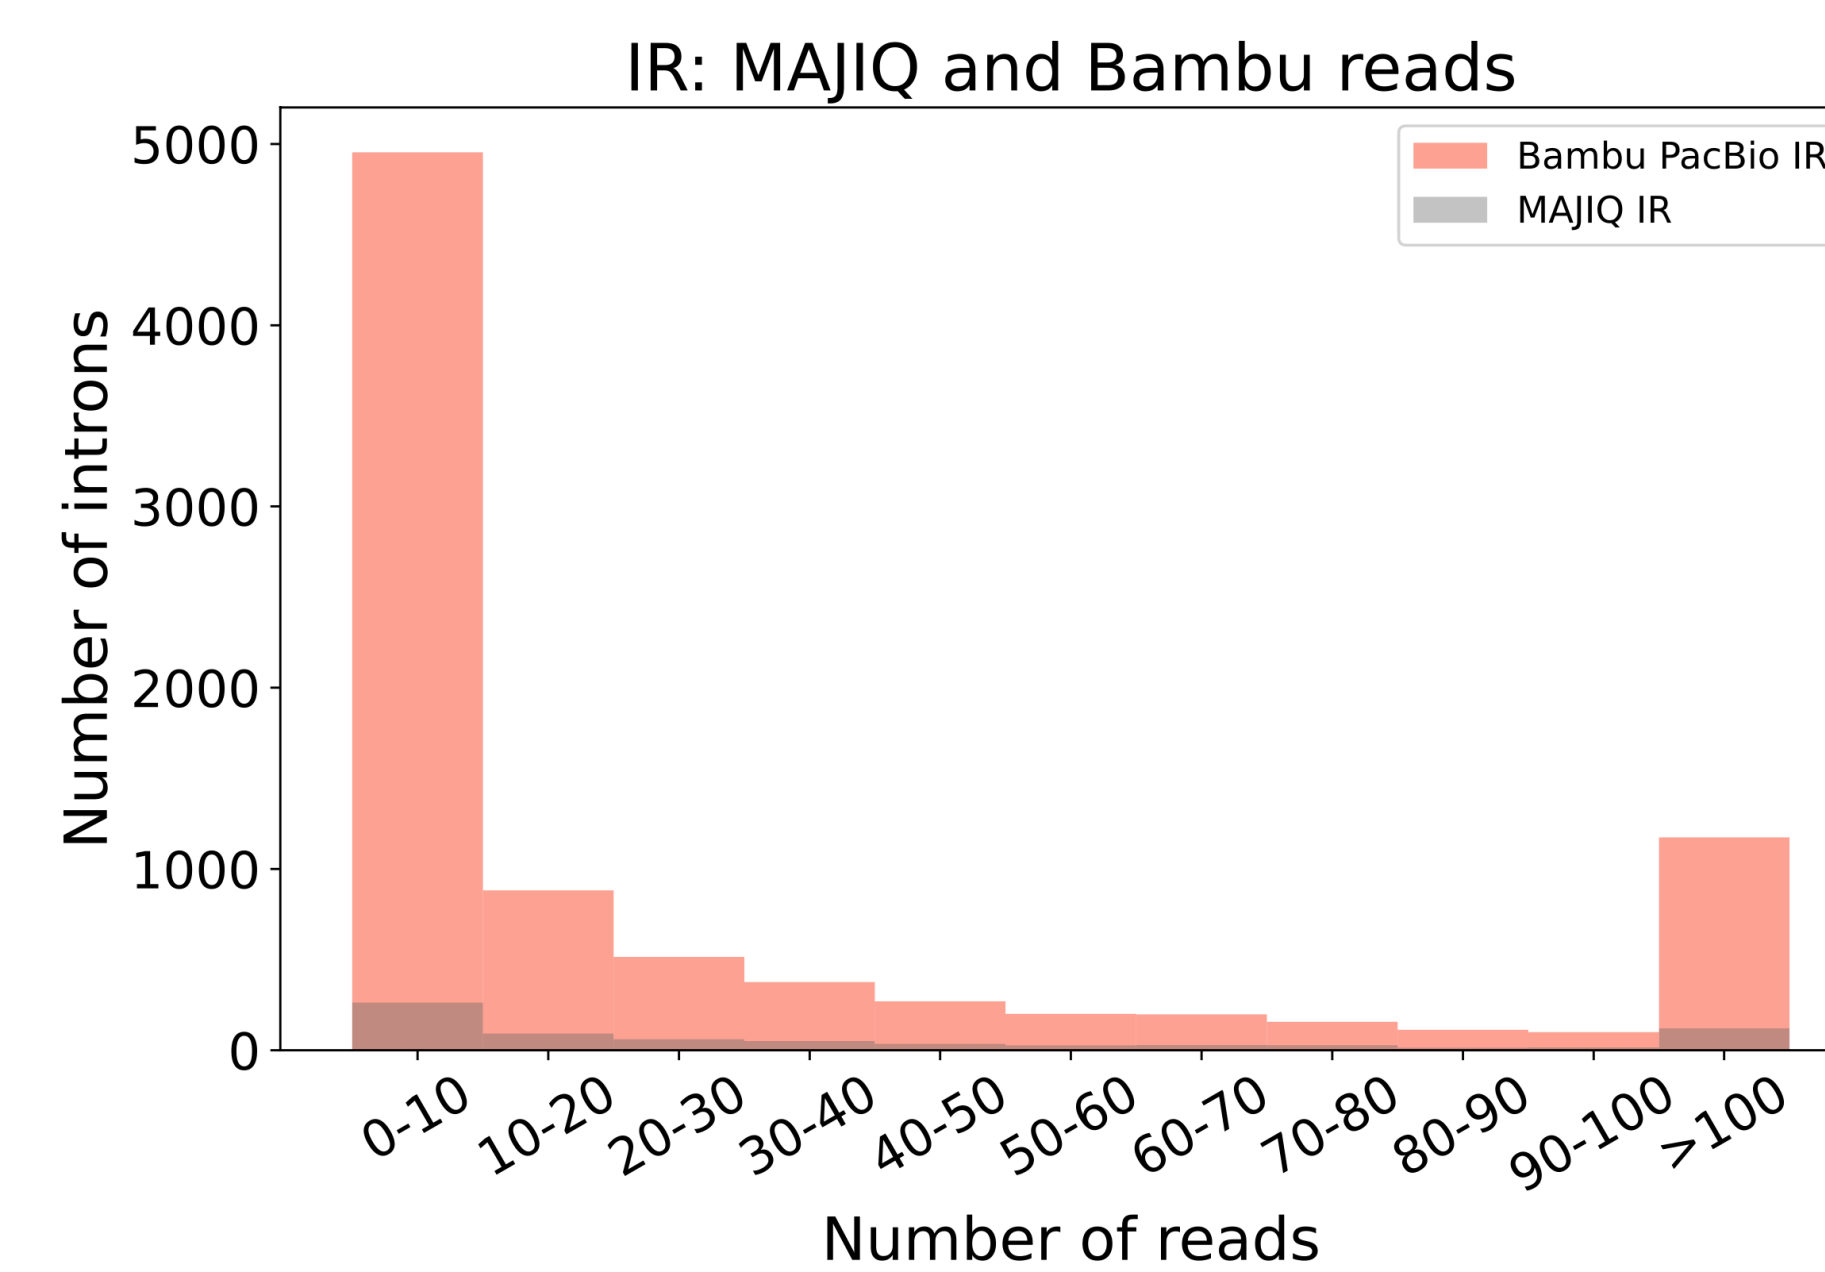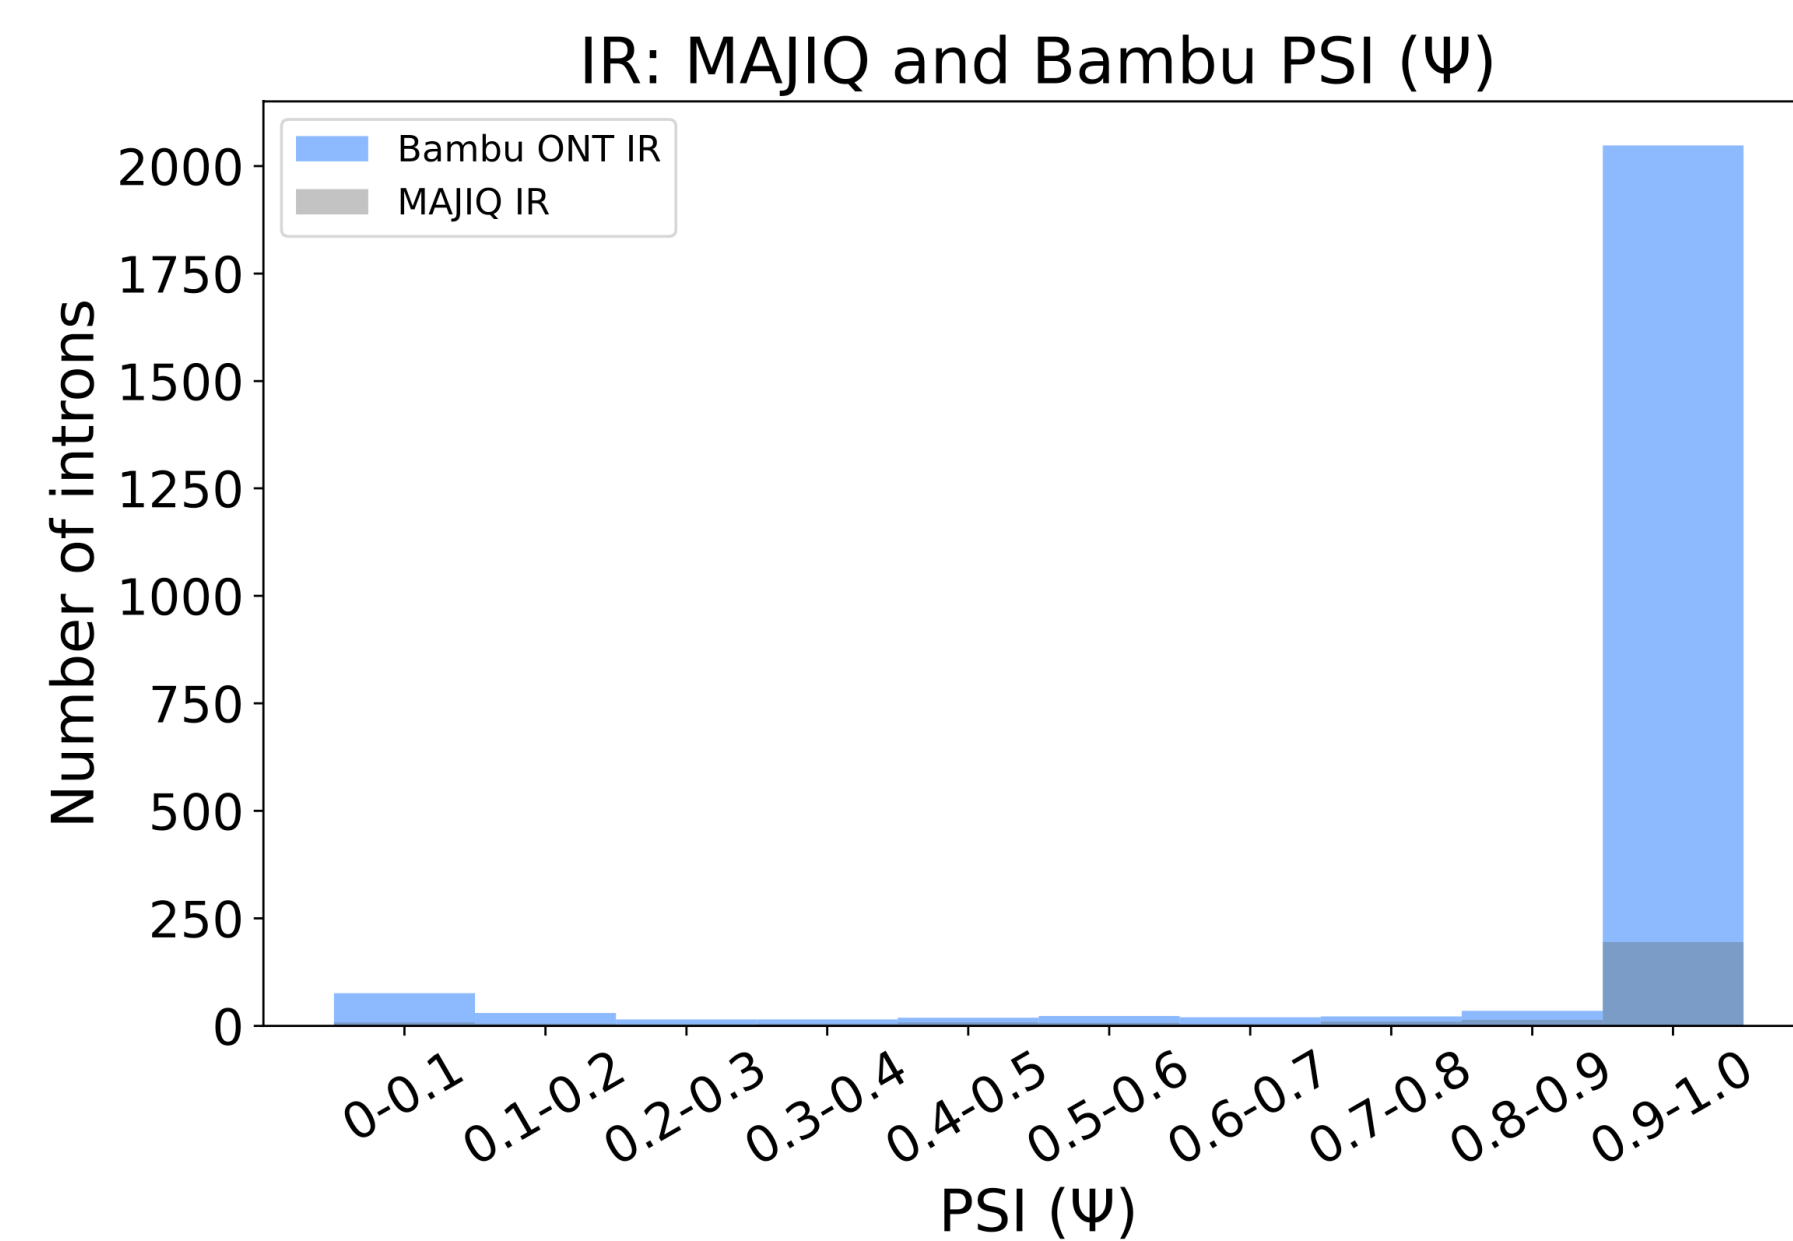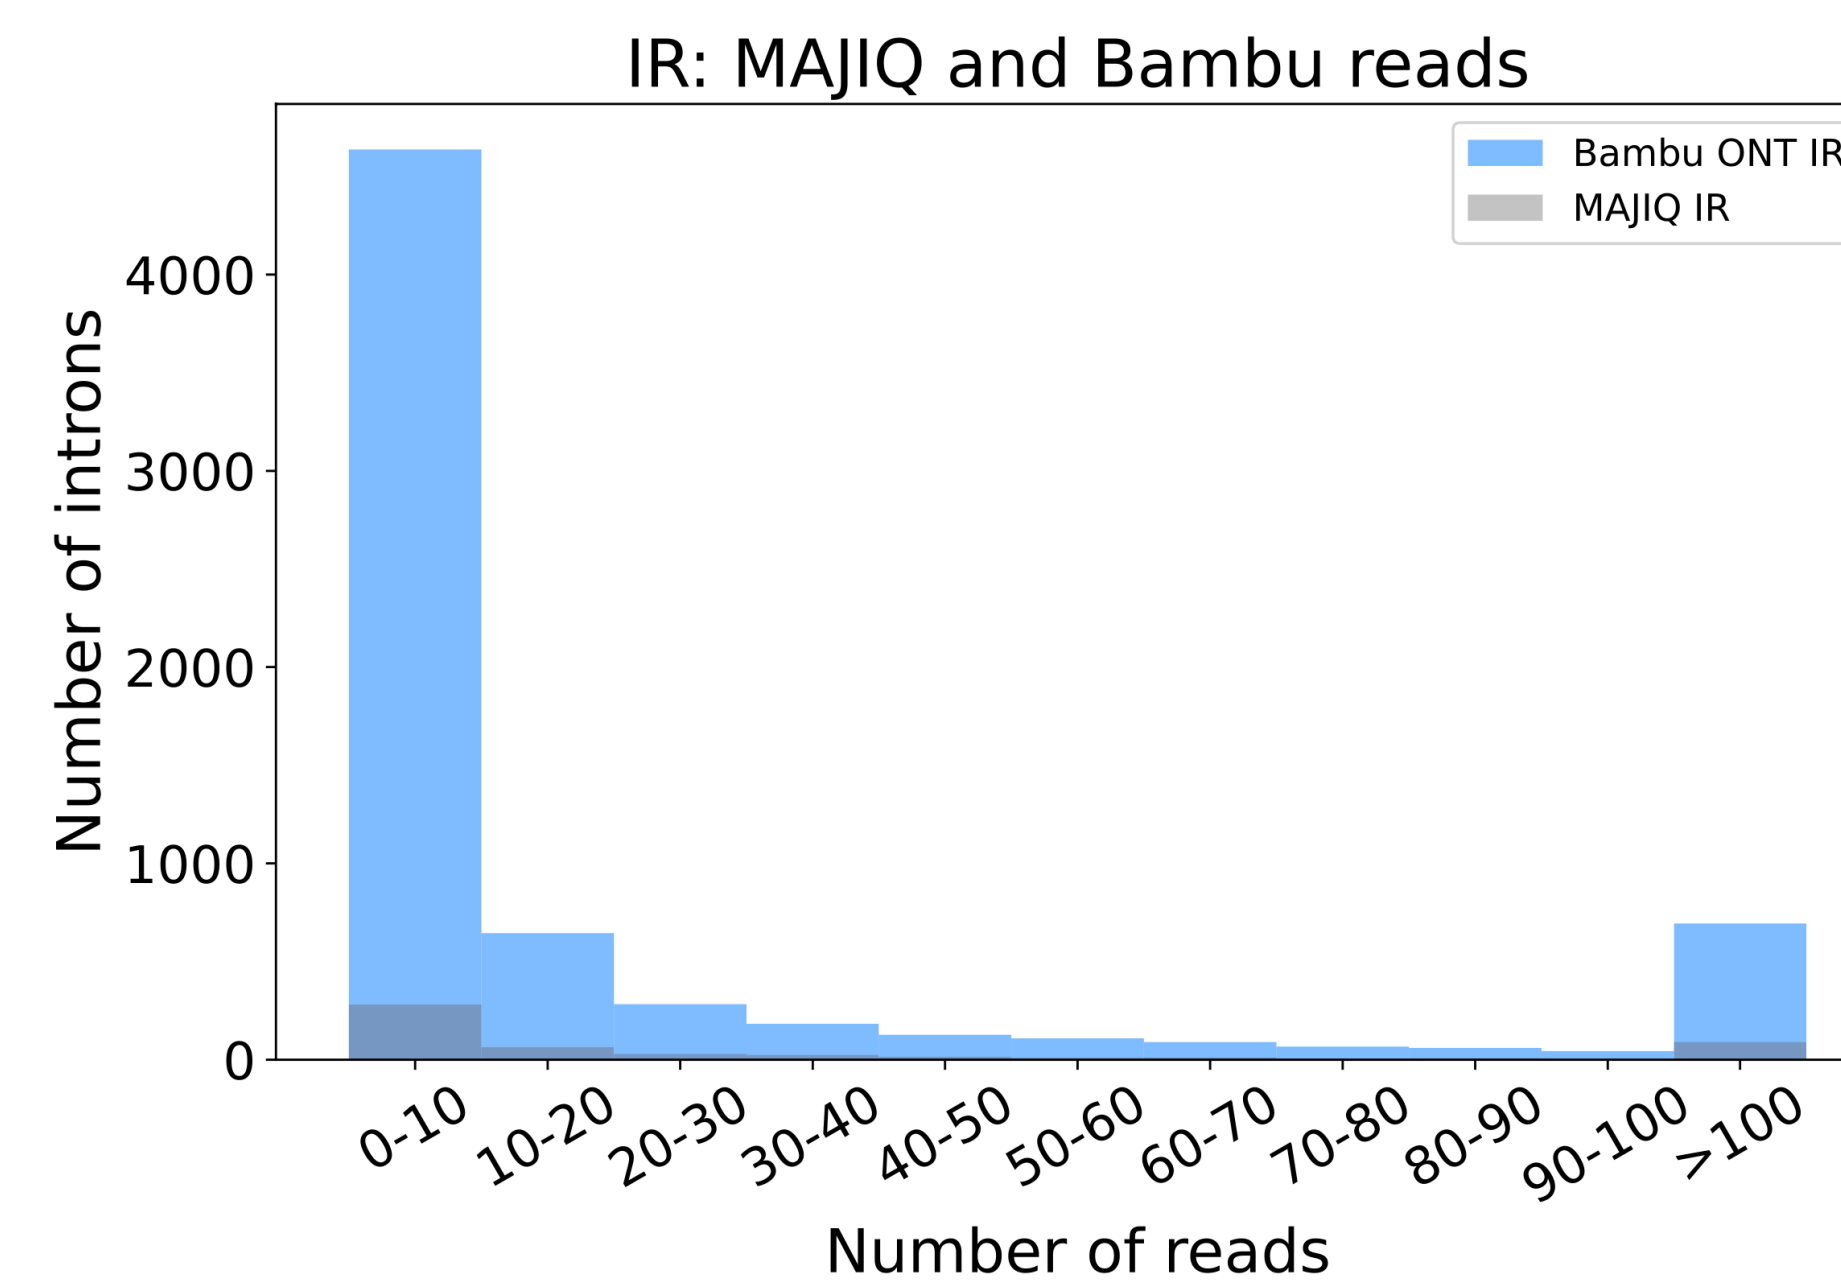

Supplement: Supplemental_code.zip [file Supplemental_Fig_S12.pdf › Supplemental_code/figures/Supplemental_Fig_S12/Supplemental_Fig_S12.pdf]

# IR: MAJIQ and Bambu PSI ( $\Psi$ )

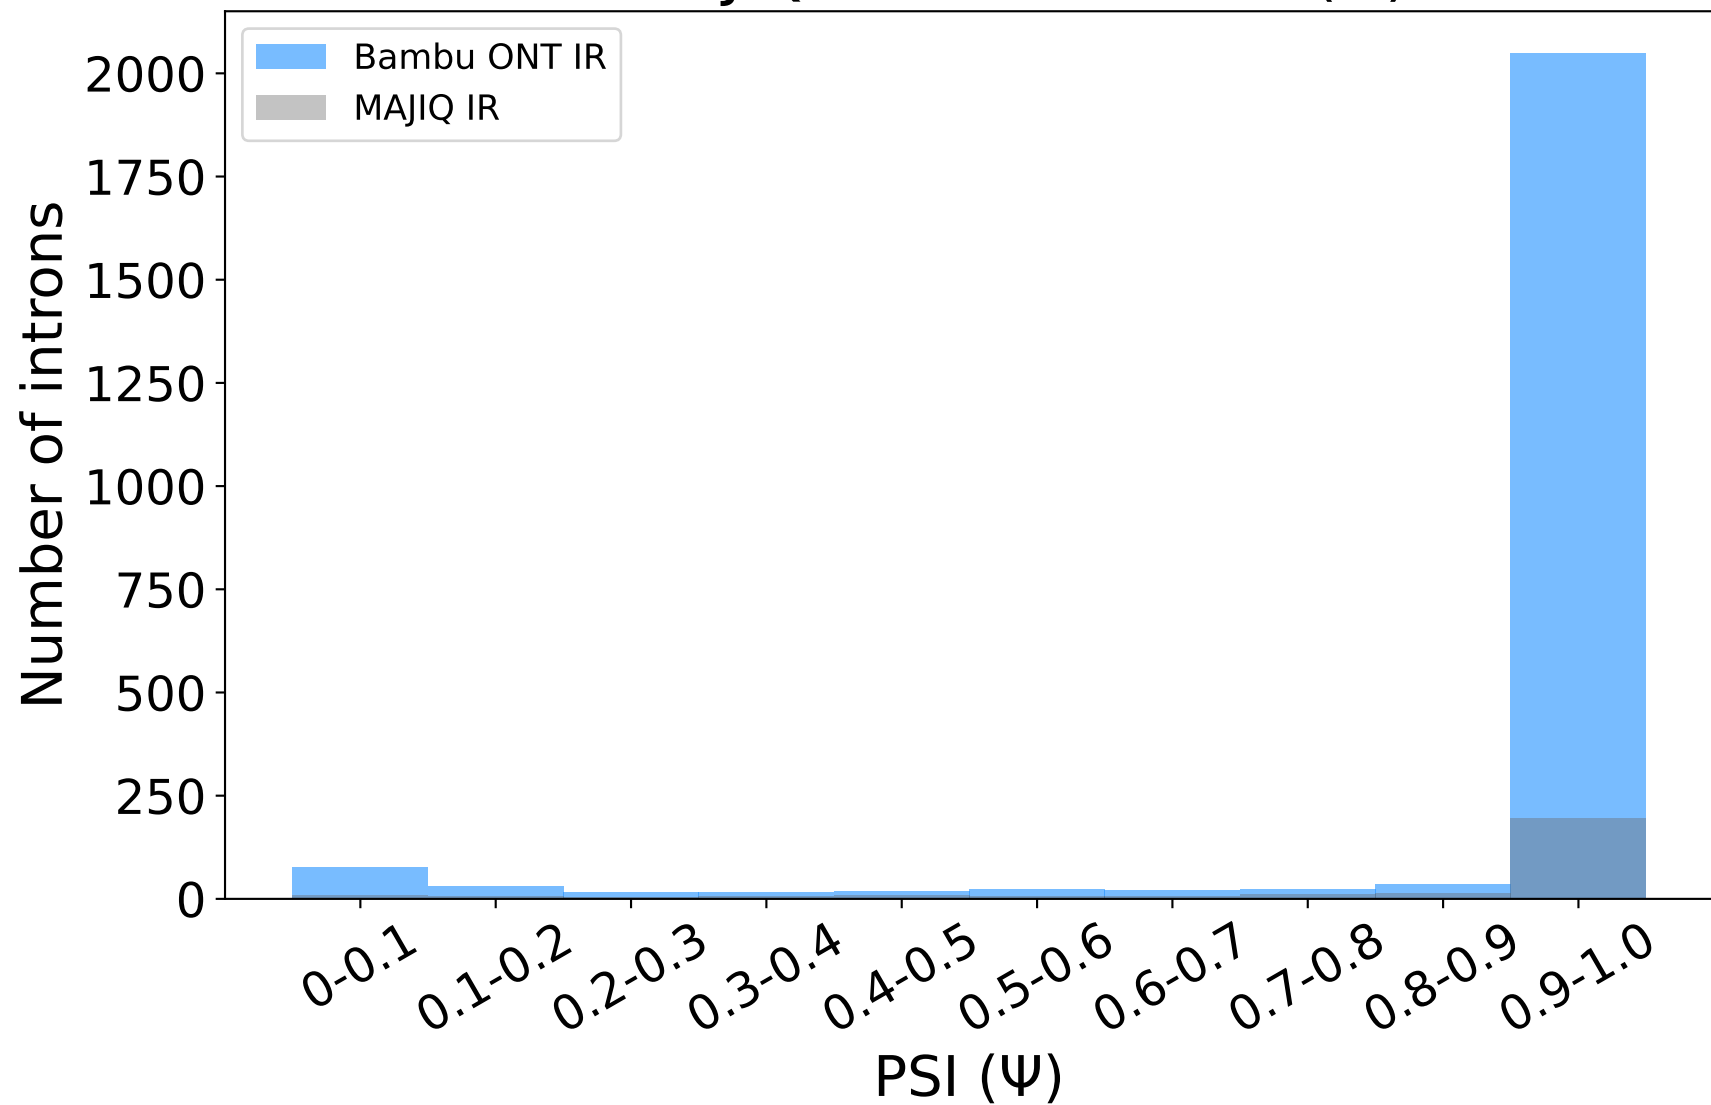

Supplement: Supplemental_code.zip [file Supplemental_Fig_S12_bambu_ont_ir_psi.pdf › Supplemental_code/figures/Supplemental_Fig_S12/Supplemental_Fig_S12_bambu_ont_ir_psi.pdf]

# IR: MAJIQ and Bambu reads

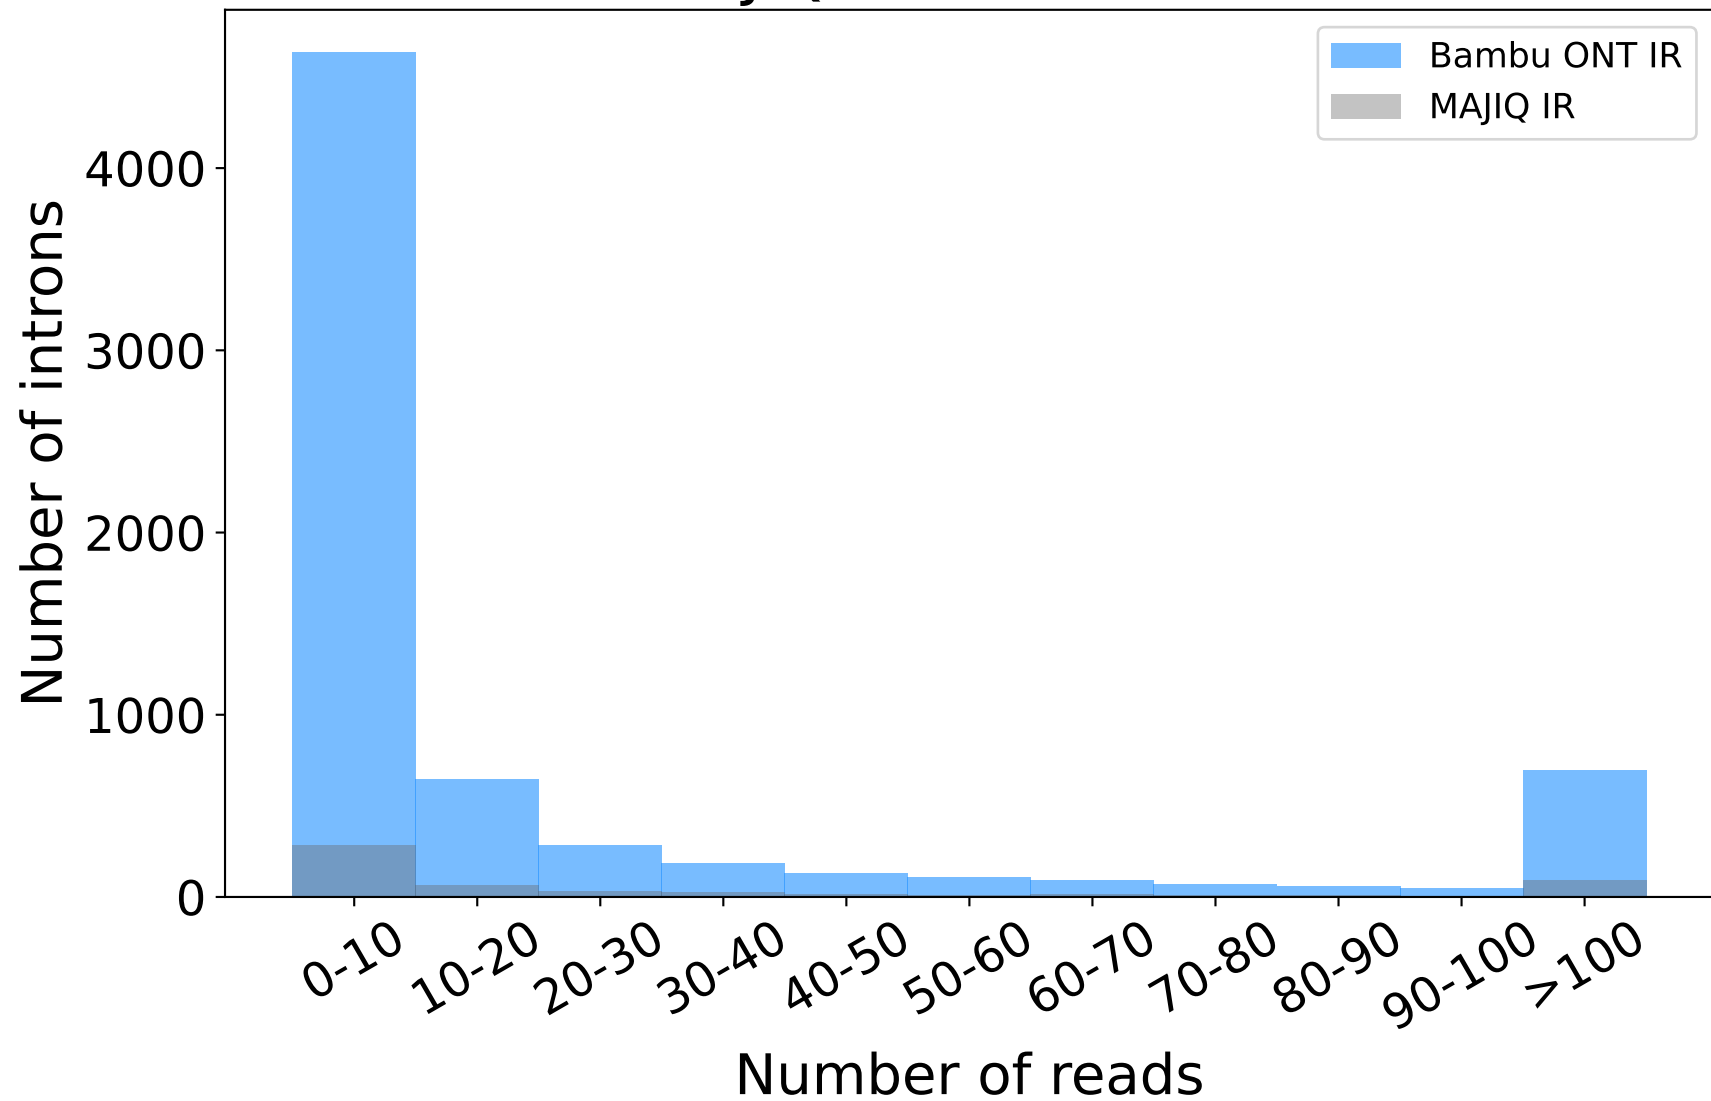

Supplement: Supplemental_code.zip [file Supplemental_Fig_S12_bambu_ont_ir_read.pdf › Supplemental_code/figures/Supplemental_Fig_S12/Supplemental_Fig_S12_bambu_ont_ir_read.pdf]

# IR: MAJIQ and Bambu PSI ( $\Psi$ )

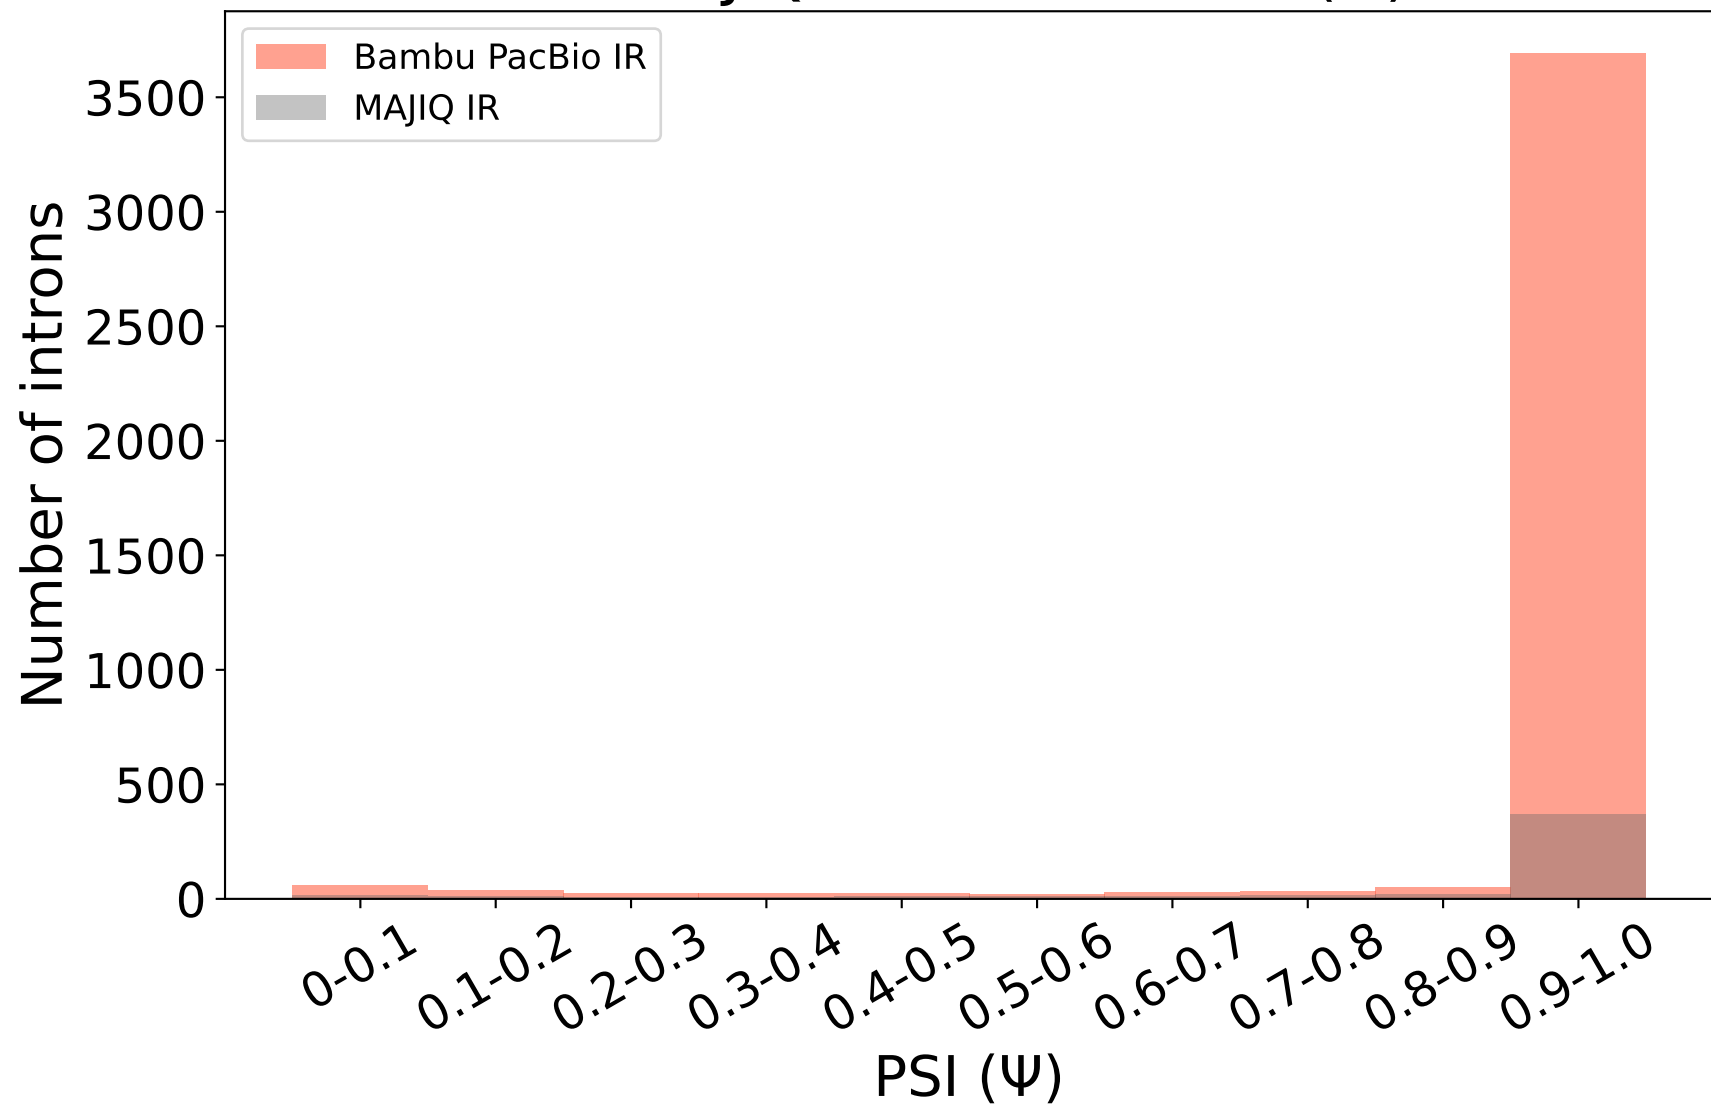

Supplement: Supplemental_code.zip [file Supplemental_Fig_S12_bambu_pcb_ir_psi.pdf › Supplemental_code/figures/Supplemental_Fig_S12/Supplemental_Fig_S12_bambu_pcb_ir_psi.pdf]

# IR: MAJIQ and Bambu reads

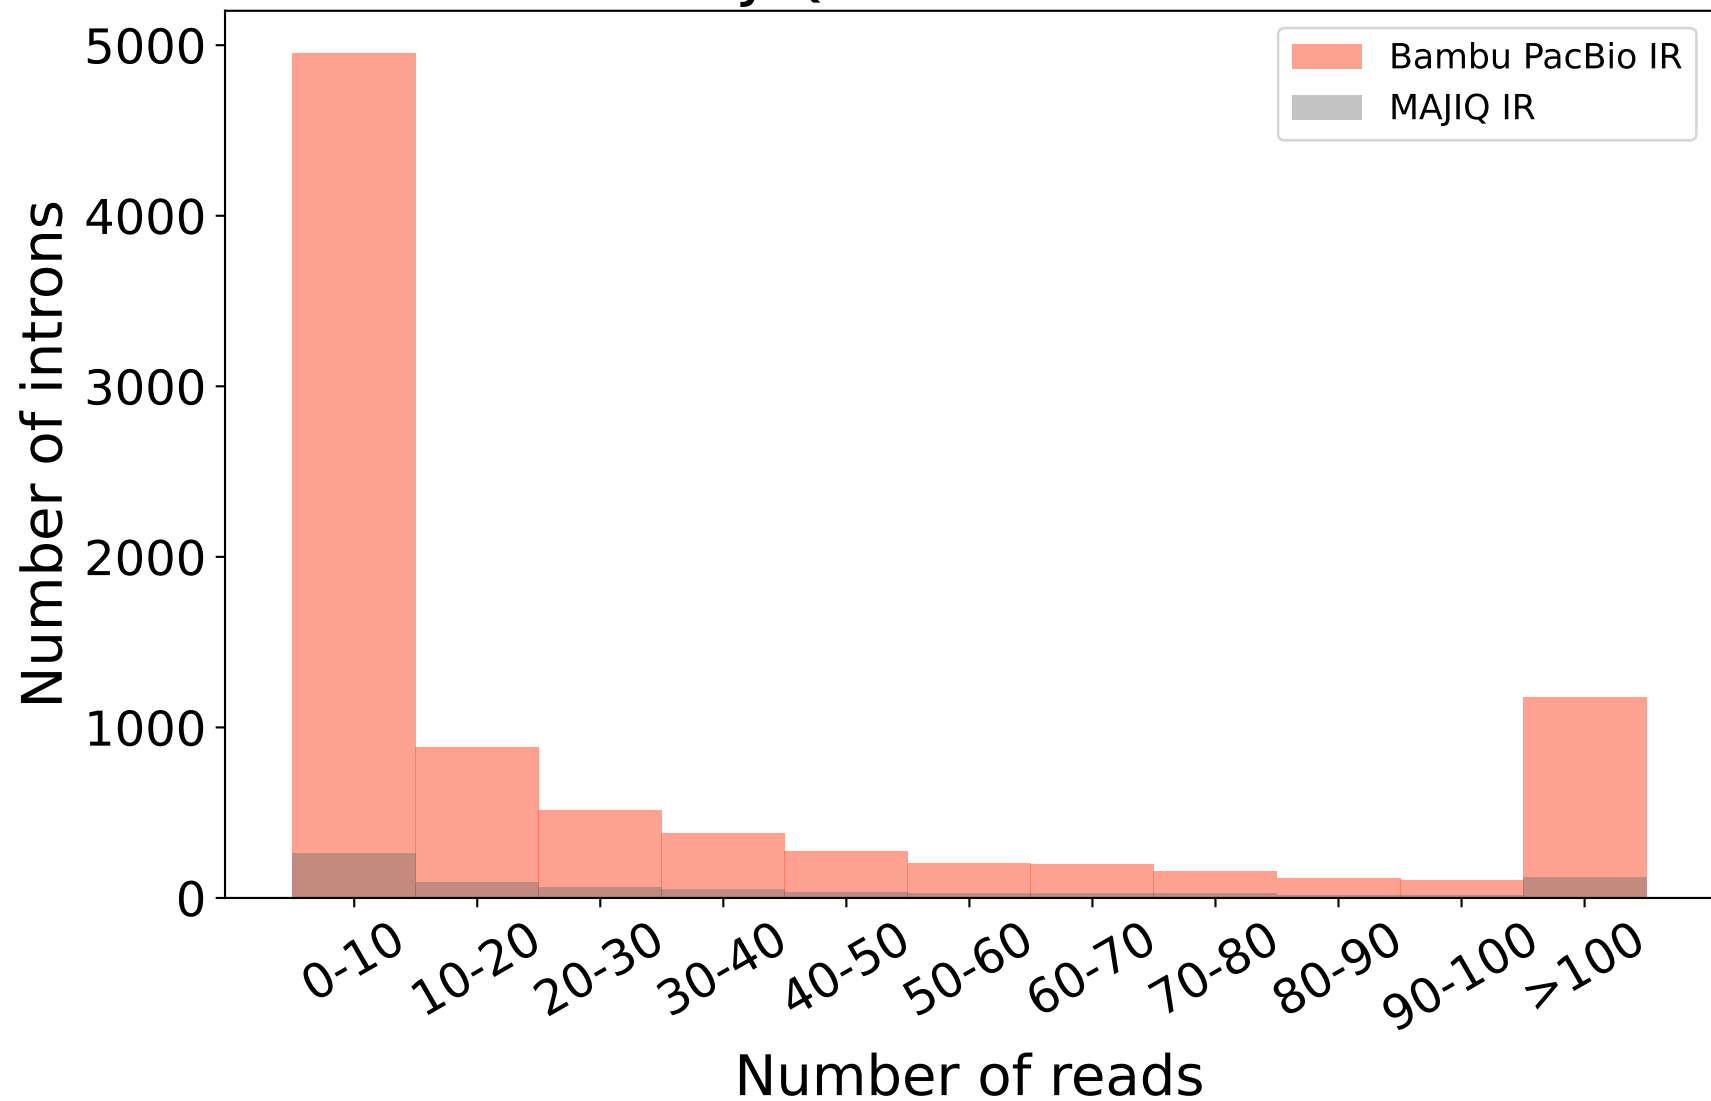

Supplement: Supplemental_code.zip [file Supplemental_Fig_S12_bambu_pcb_ir_read.pdf › Supplemental_code/figures/Supplemental_Fig_S12/Supplemental_Fig_S12_bambu_pcb_ir_read.pdf]

# IR: MAJIQ and ESPRESSO PSI ( $\Psi$ )

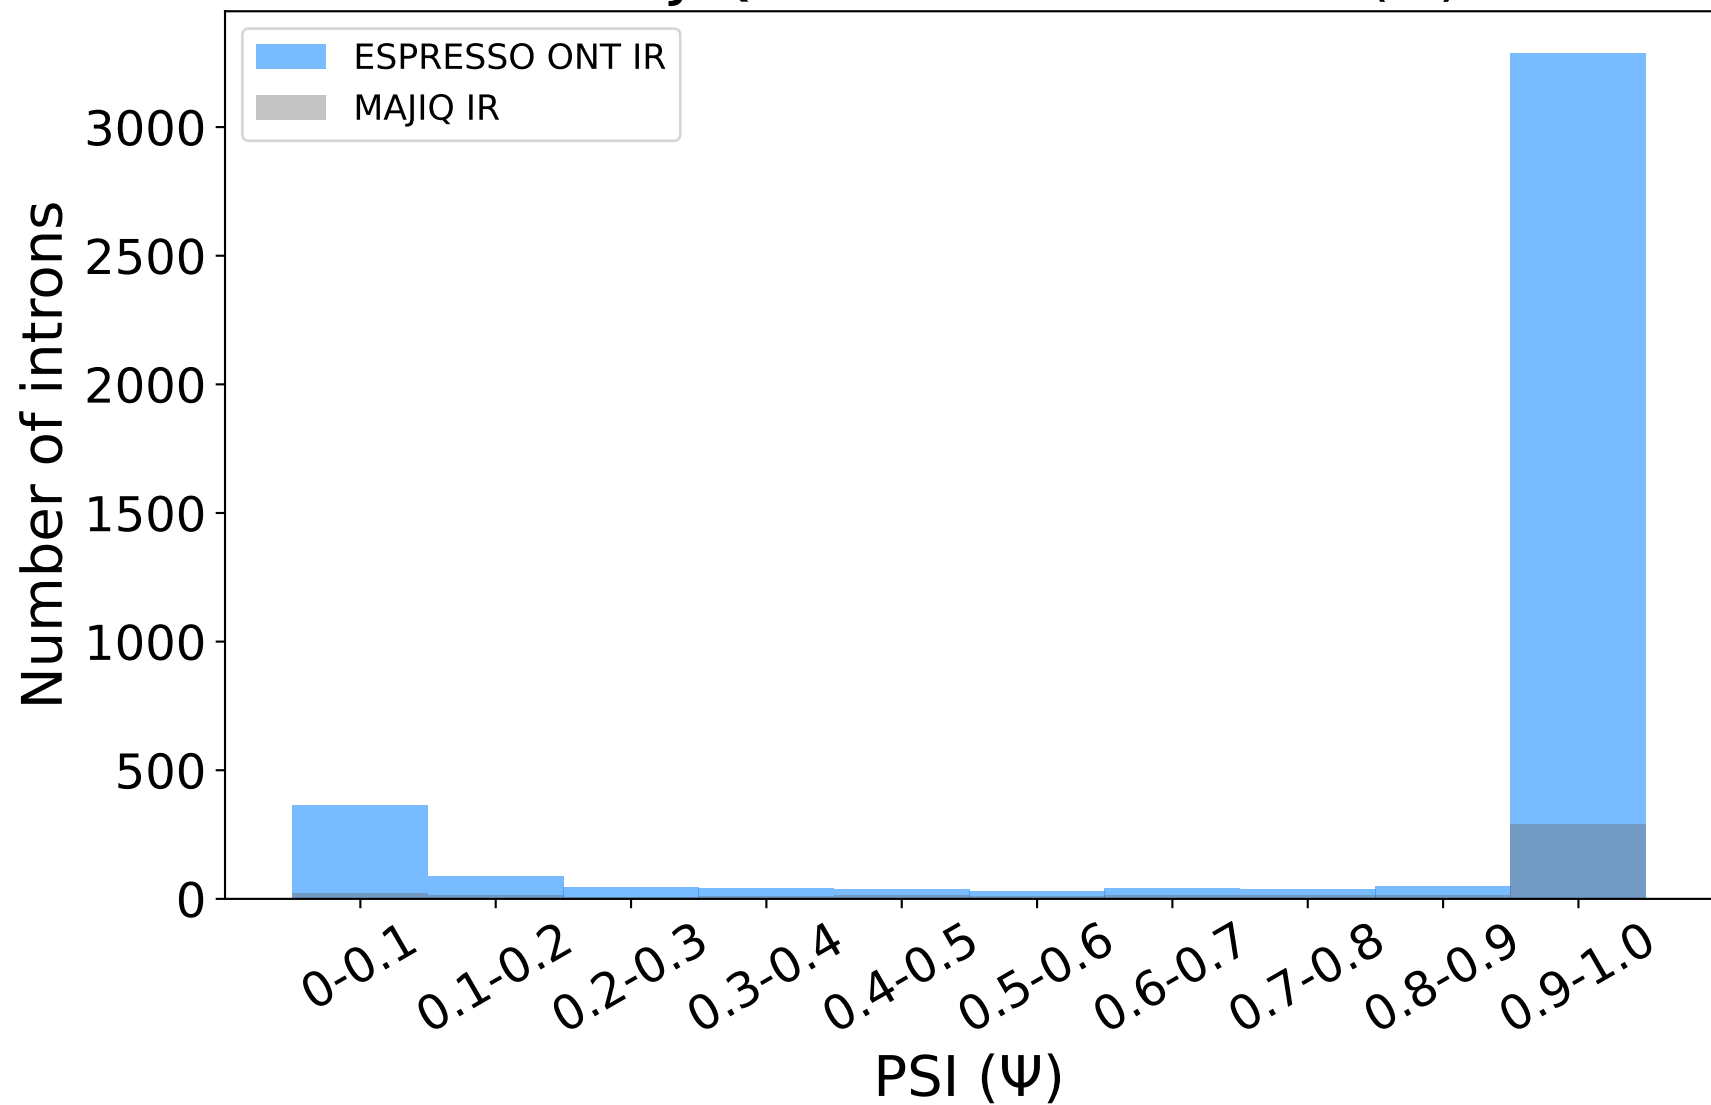

Supplement: Supplemental_code.zip [file Supplemental_Fig_S12_esp_ont_ir_psi.pdf › Supplemental_code/figures/Supplemental_Fig_S12/Supplemental_Fig_S12_esp_ont_ir_psi.pdf]

# IR: MAJIQ and ESPRESSO reads

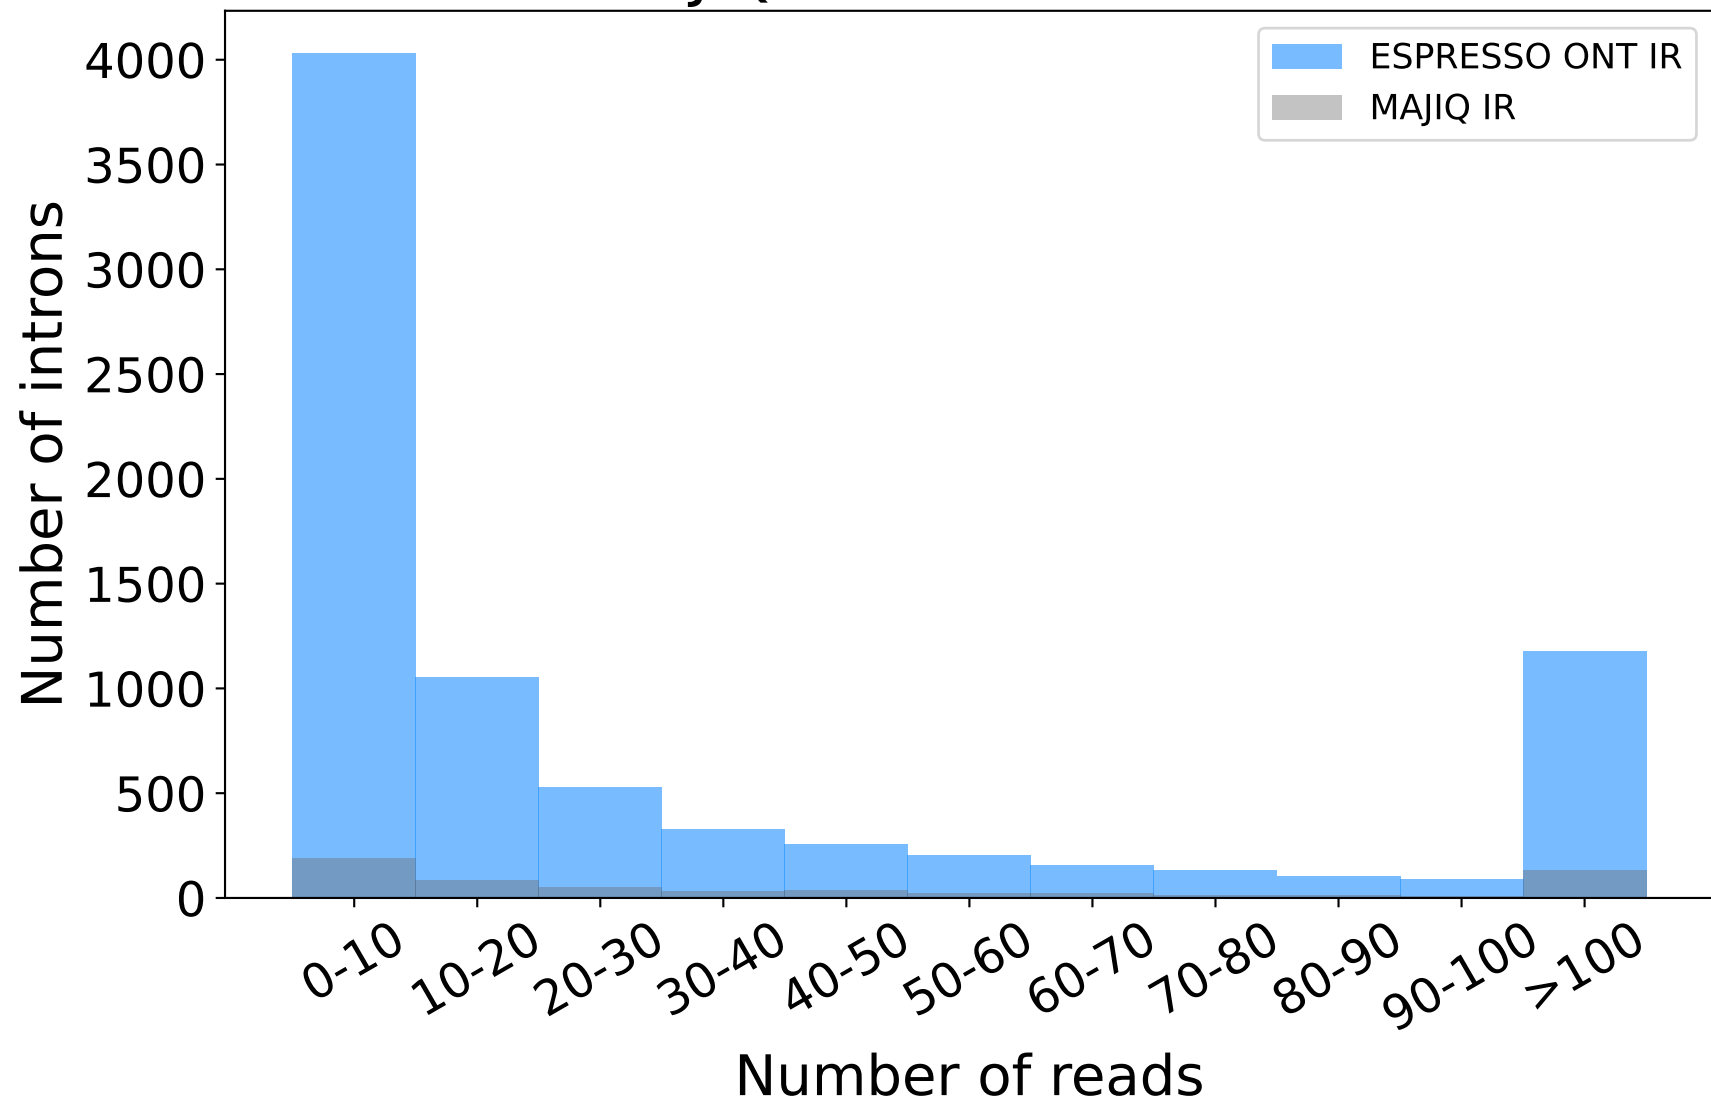

Supplement: Supplemental_code.zip [file Supplemental_Fig_S12_esp_ont_ir_read.pdf › Supplemental_code/figures/Supplemental_Fig_S12/Supplemental_Fig_S12_esp_ont_ir_read.pdf]

# IR: MAJIQ and ESPRESSO PSI ( $\Psi$ )

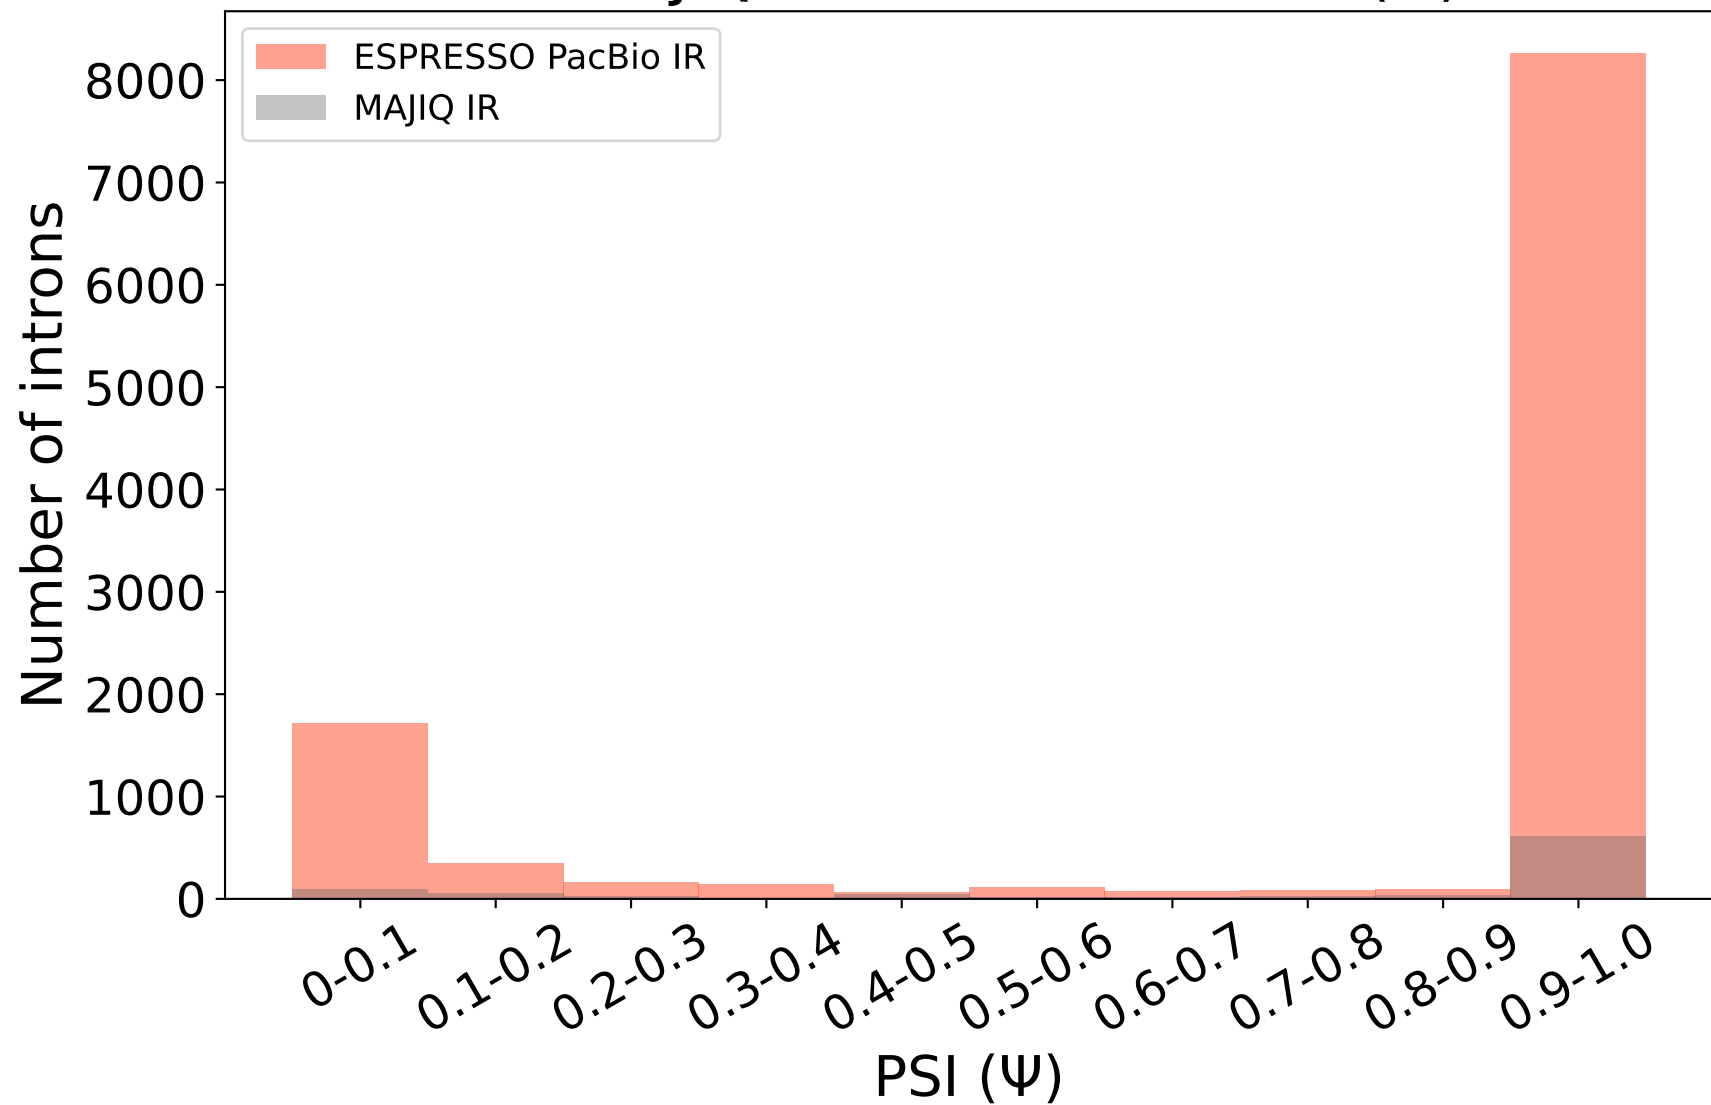

Supplement: Supplemental_code.zip [file Supplemental_Fig_S12_esp_pcb_ir_psi.pdf › Supplemental_code/figures/Supplemental_Fig_S12/Supplemental_Fig_S12_esp_pcb_ir_psi.pdf]

# IR: MAJIQ and ESPRESSO reads

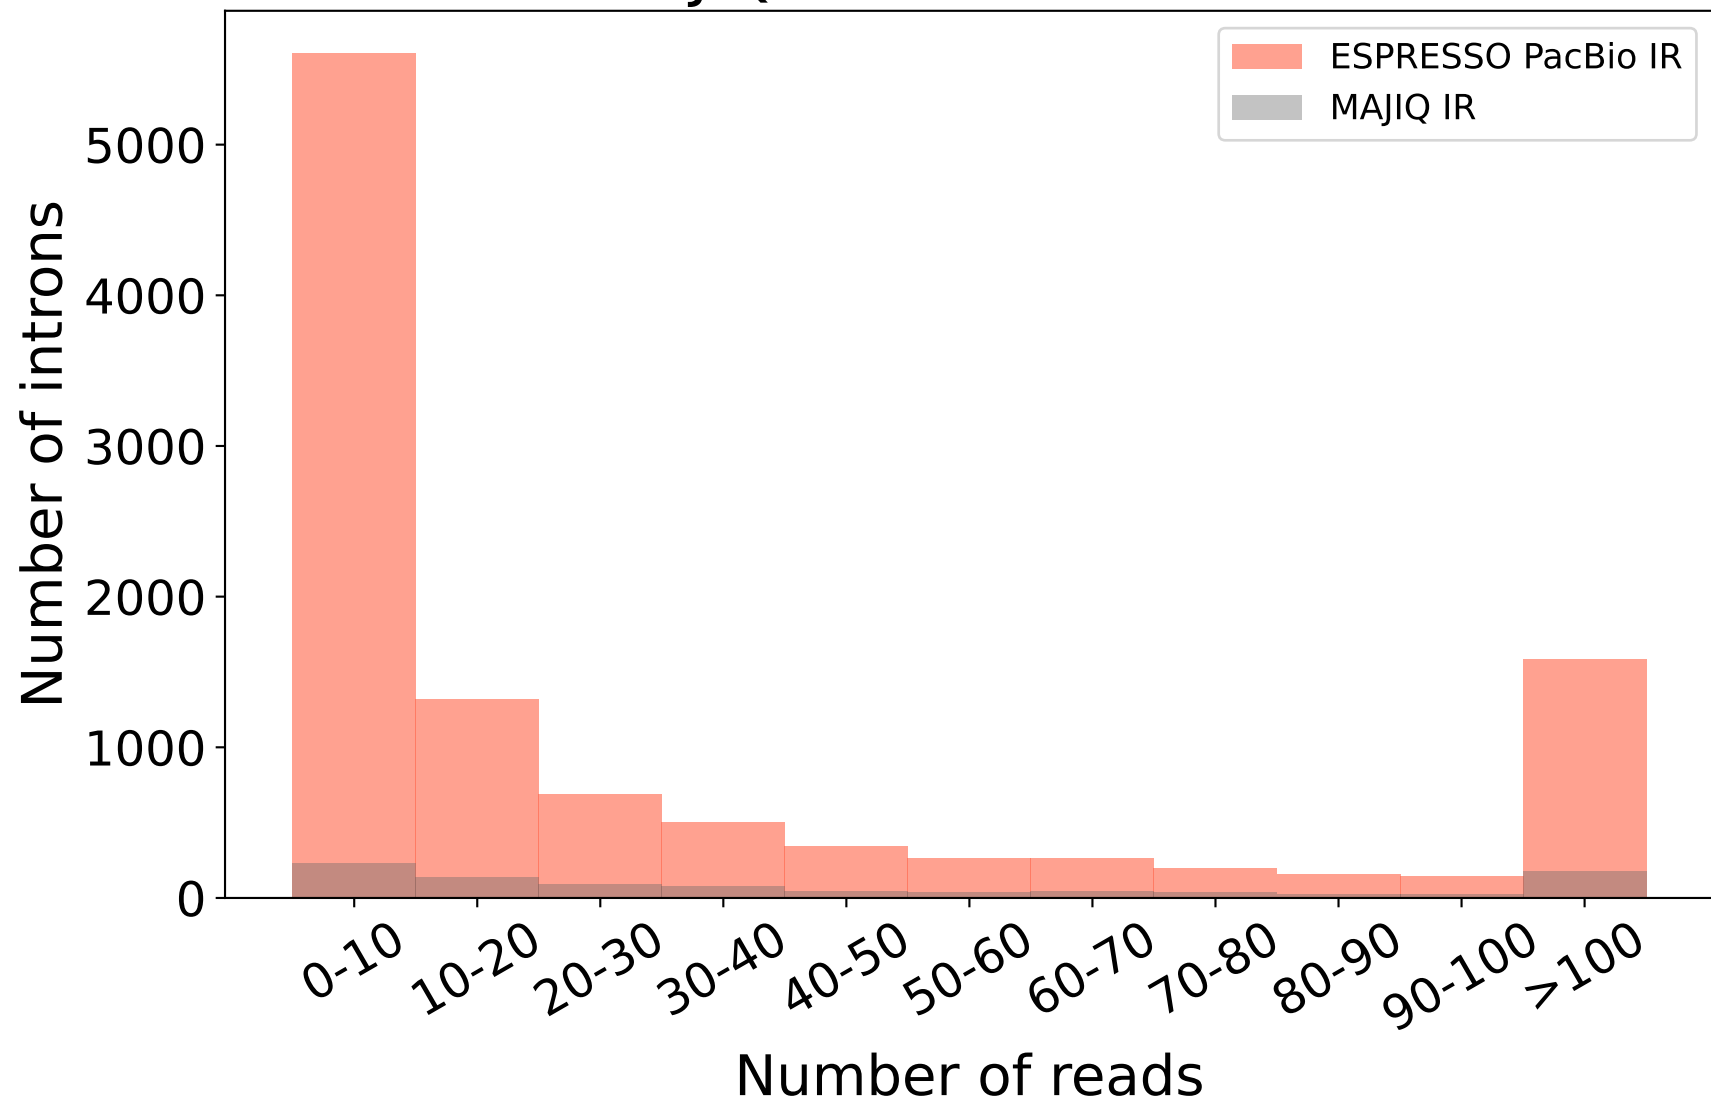

Supplement: Supplemental_code.zip [file Supplemental_Fig_S12_esp_pcb_ir_read.pdf › Supplemental_code/figures/Supplemental_Fig_S12/Supplemental_Fig_S12_esp_pcb_ir_read.pdf]

# IR: MAJIQ and FLAIR PSI ( $\Psi$ )

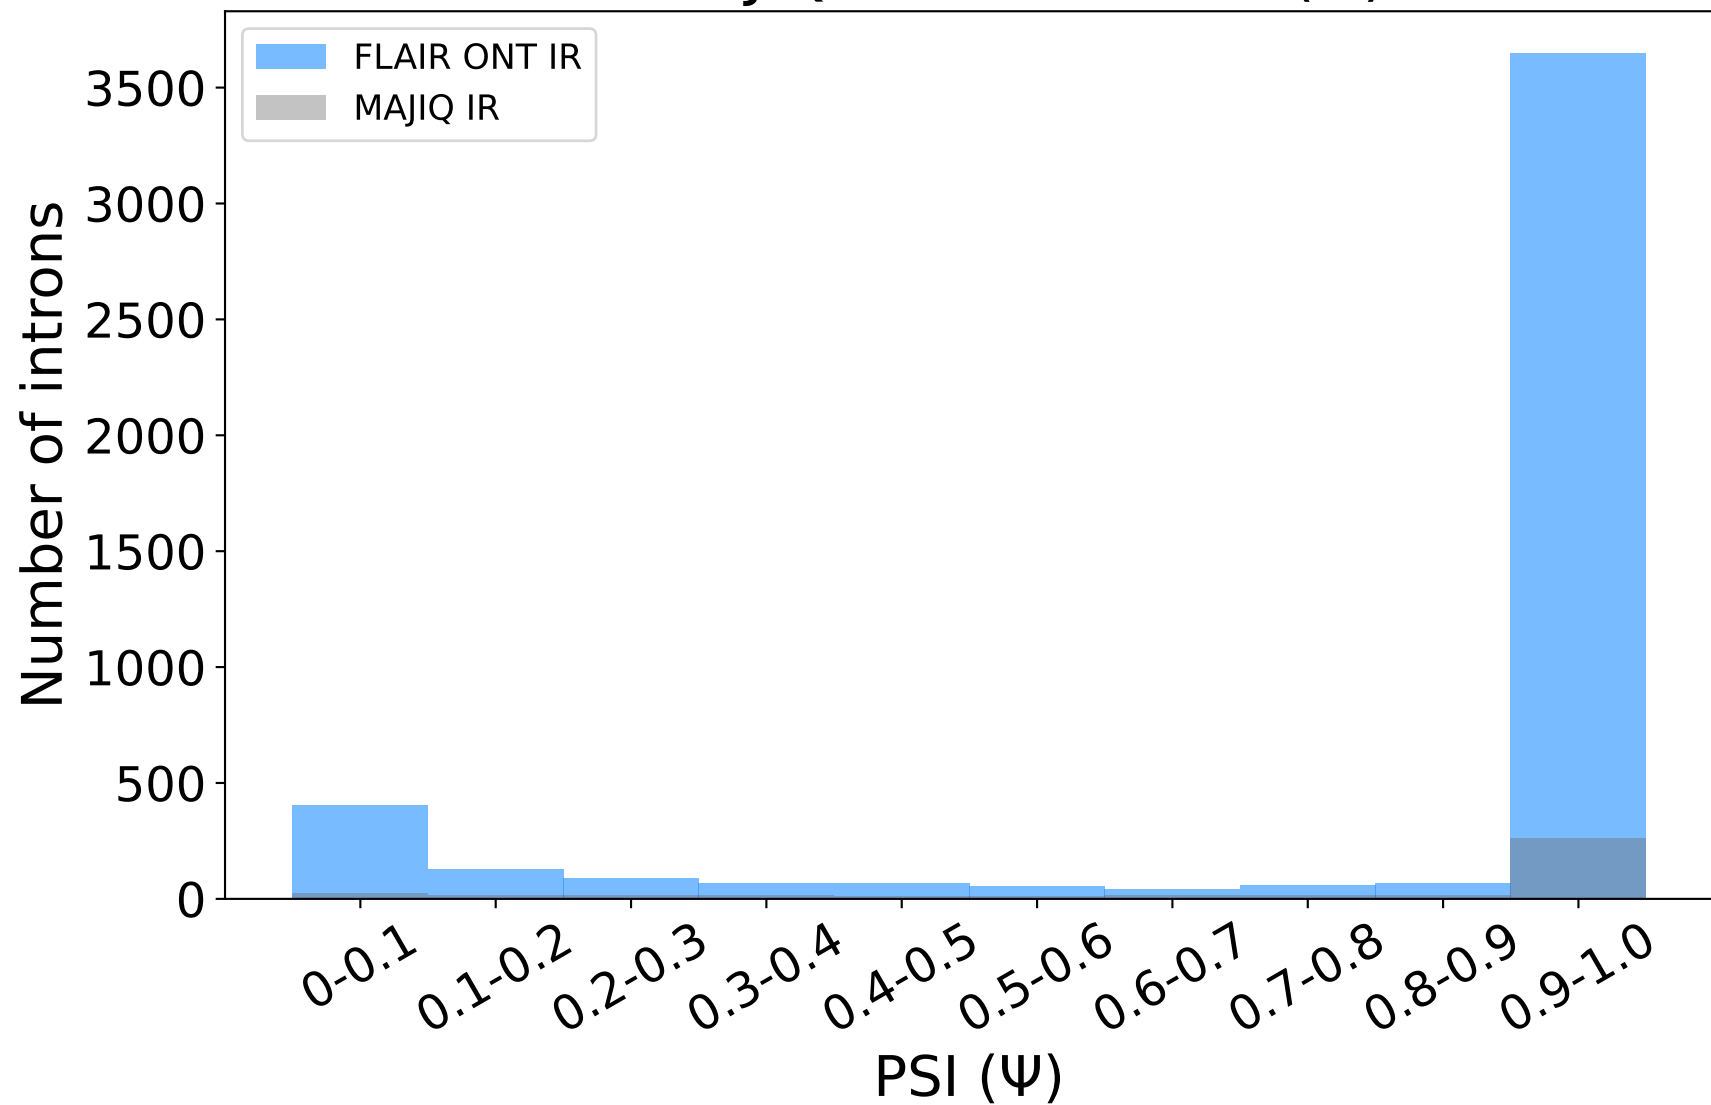

Supplement: Supplemental_code.zip [file Supplemental_Fig_S12_flair_ont_ir_psi.pdf › Supplemental_code/figures/Supplemental_Fig_S12/Supplemental_Fig_S12_flair_ont_ir_psi.pdf]

# IR: MAJIQ and FLAIR reads

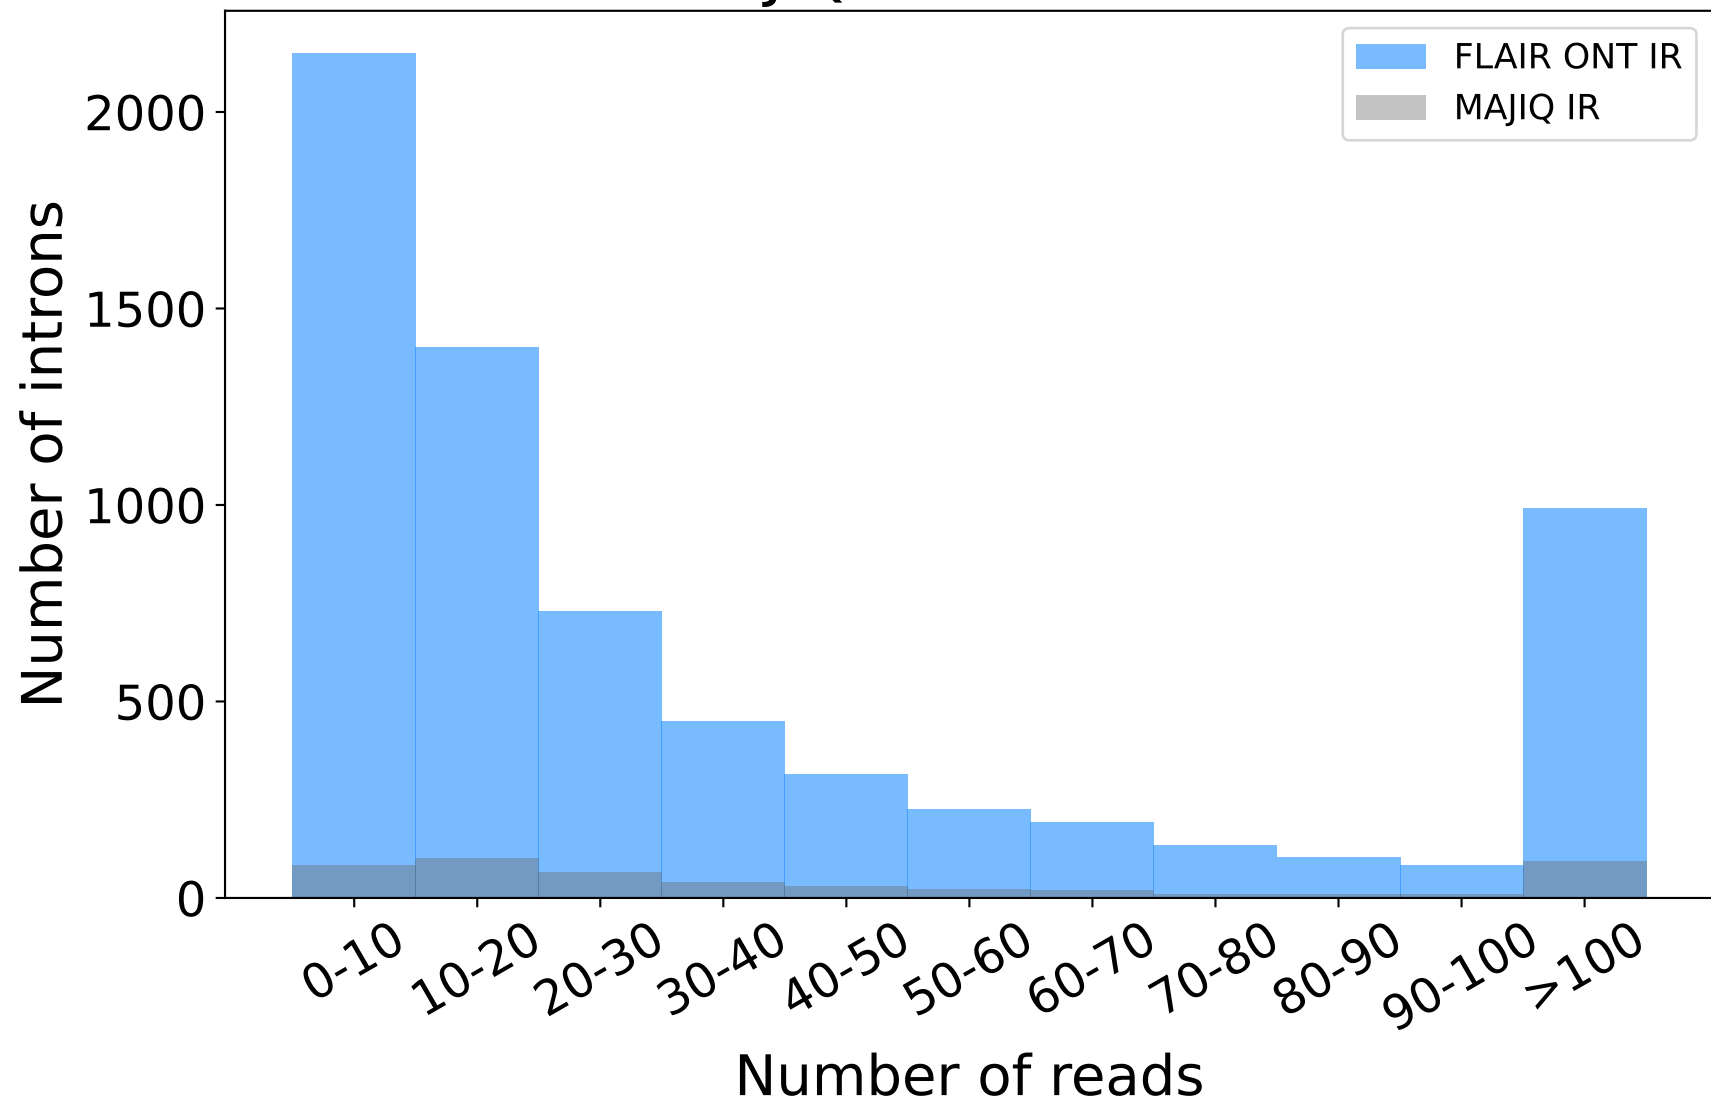

Supplement: Supplemental_code.zip [file Supplemental_Fig_S12_flair_ont_ir_read.pdf › Supplemental_code/figures/Supplemental_Fig_S12/Supplemental_Fig_S12_flair_ont_ir_read.pdf]

# IR: MAJIQ and FLAIR PSI ( $\Psi$ )

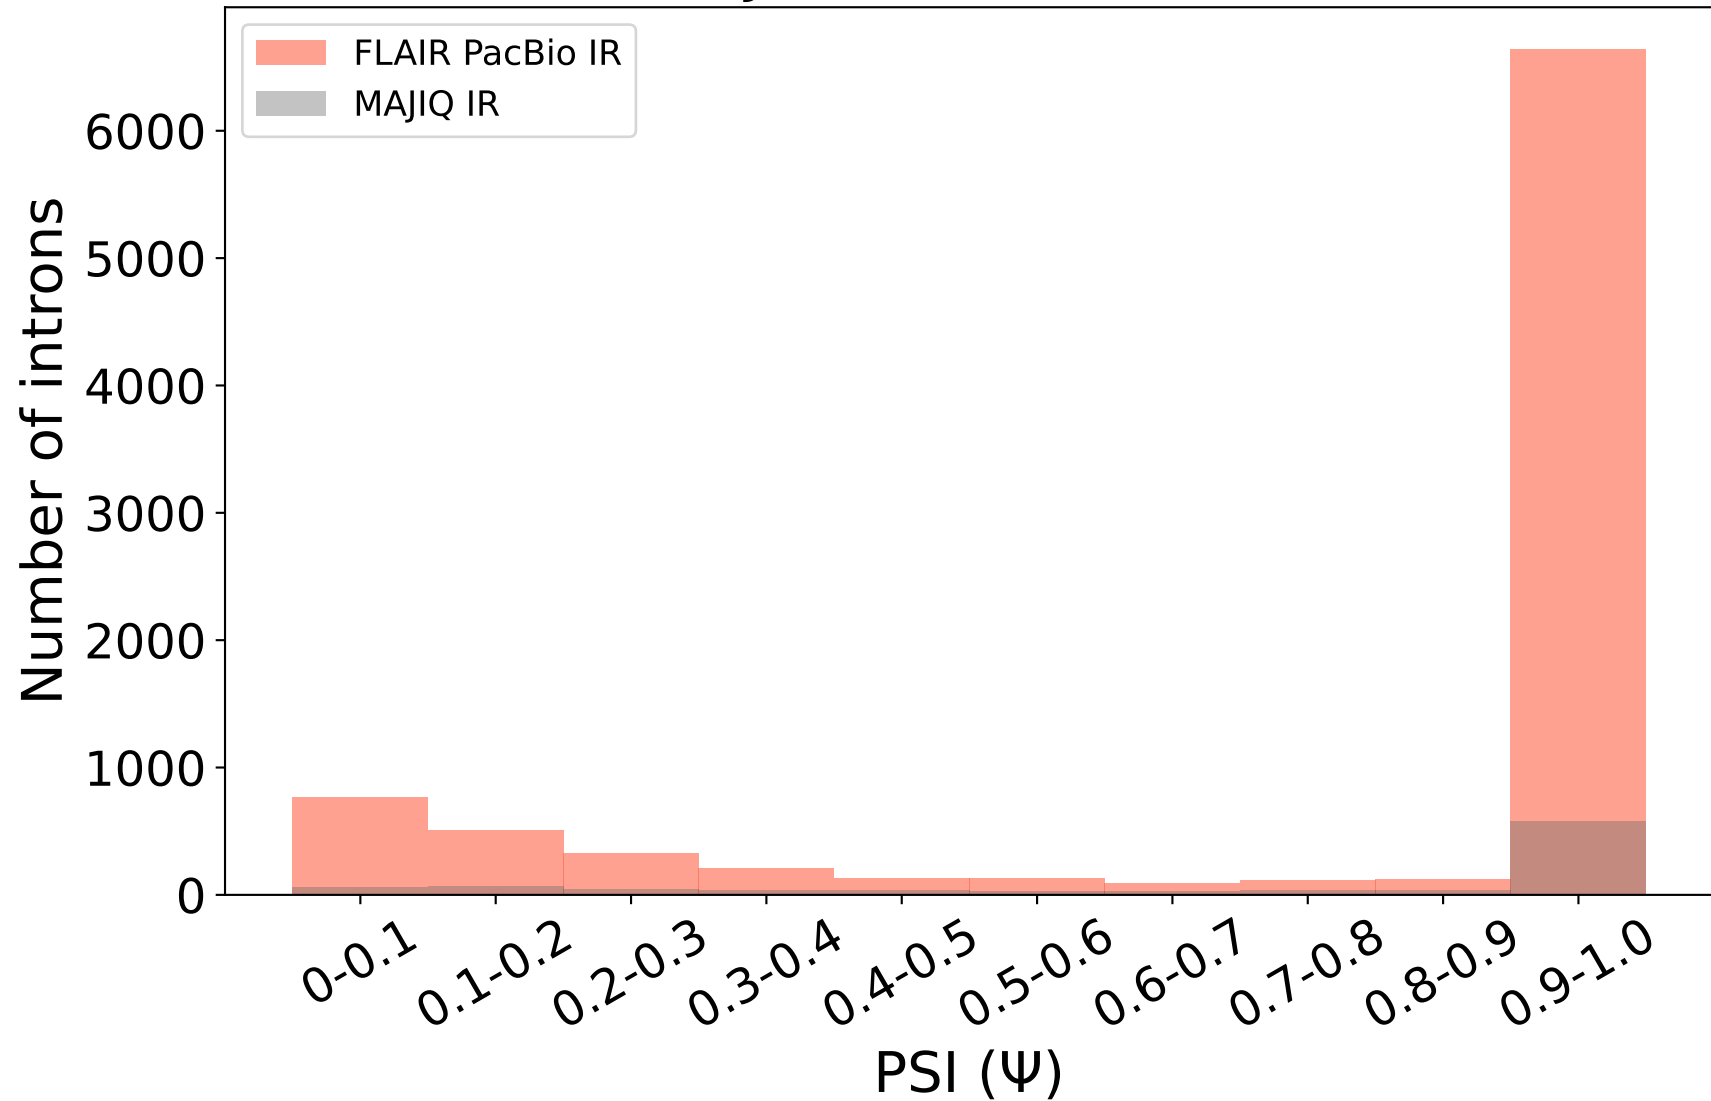

Supplement: Supplemental_code.zip [file Supplemental_Fig_S12_flair_pcb_ir_psi.pdf › Supplemental_code/figures/Supplemental_Fig_S12/Supplemental_Fig_S12_flair_pcb_ir_psi.pdf]

# IR: MAJIQ and FLAIR reads

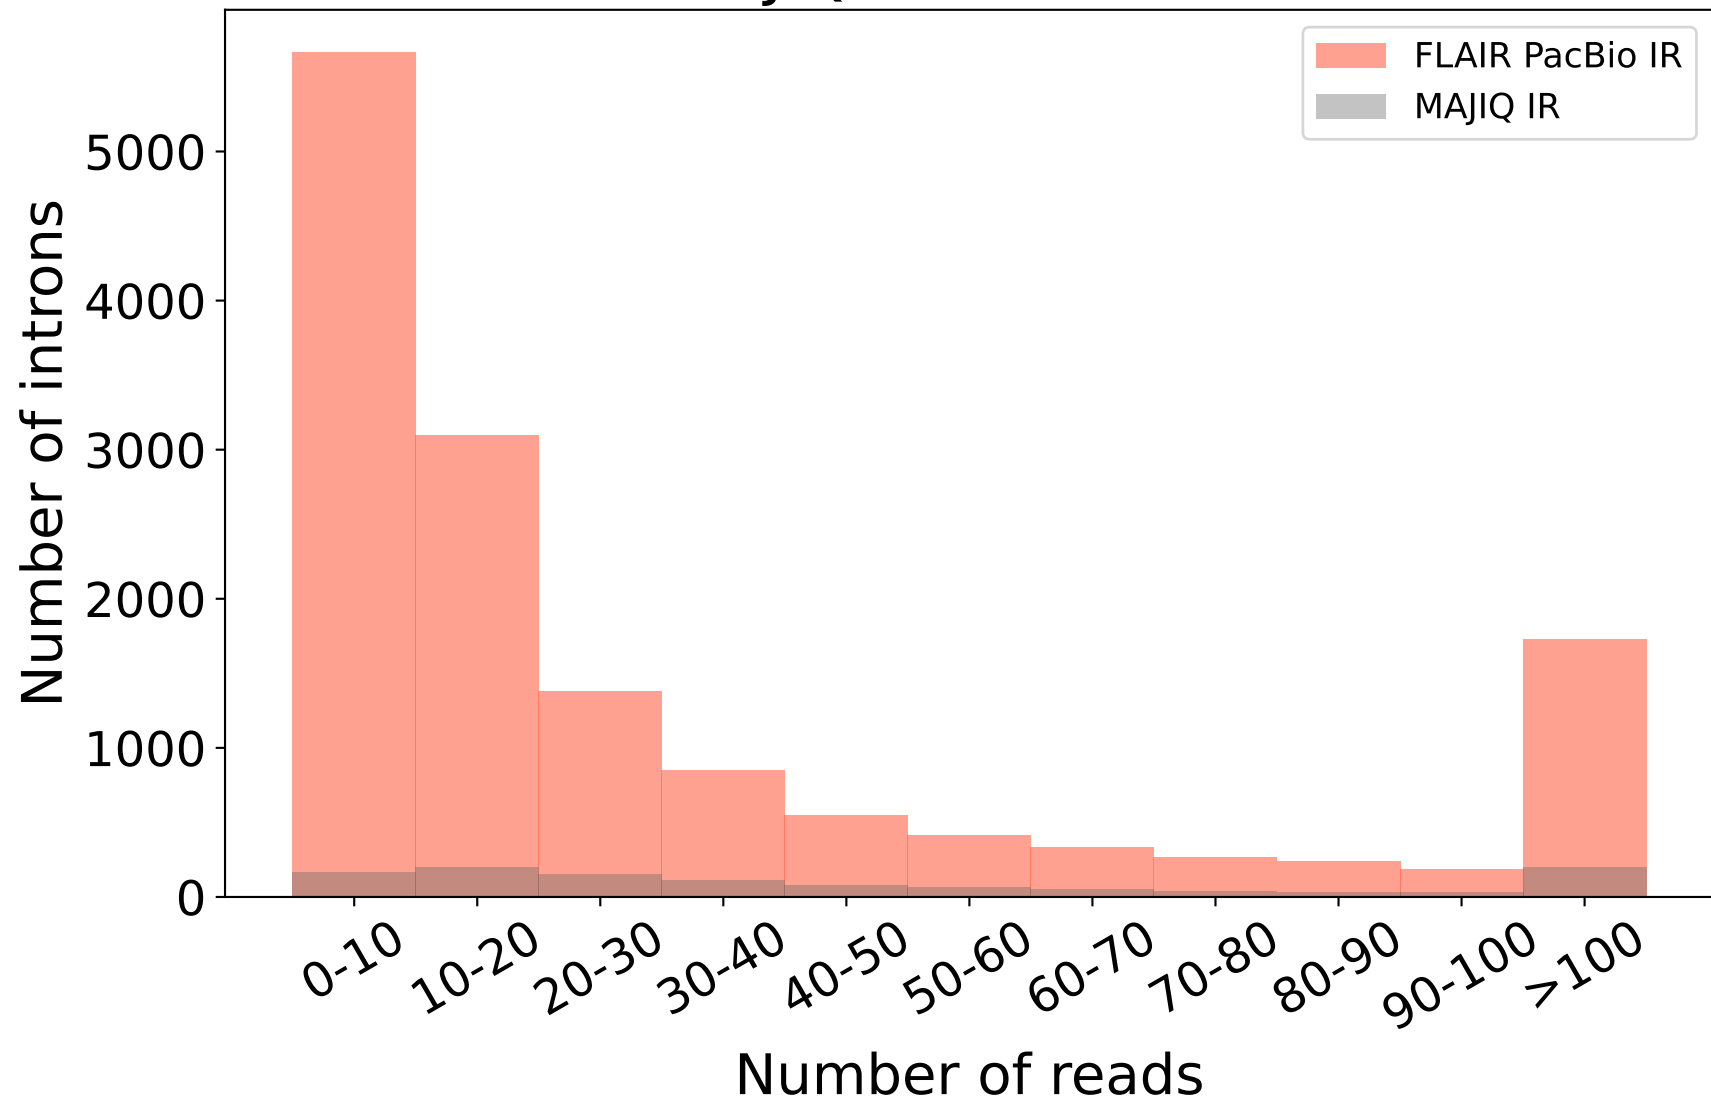

Supplement: Supplemental_code.zip [file Supplemental_Fig_S12_flair_pcb_ir_read.pdf › Supplemental_code/figures/Supplemental_Fig_S12/Supplemental_Fig_S12_flair_pcb_ir_read.pdf]

GTEX Heart atrial appendage

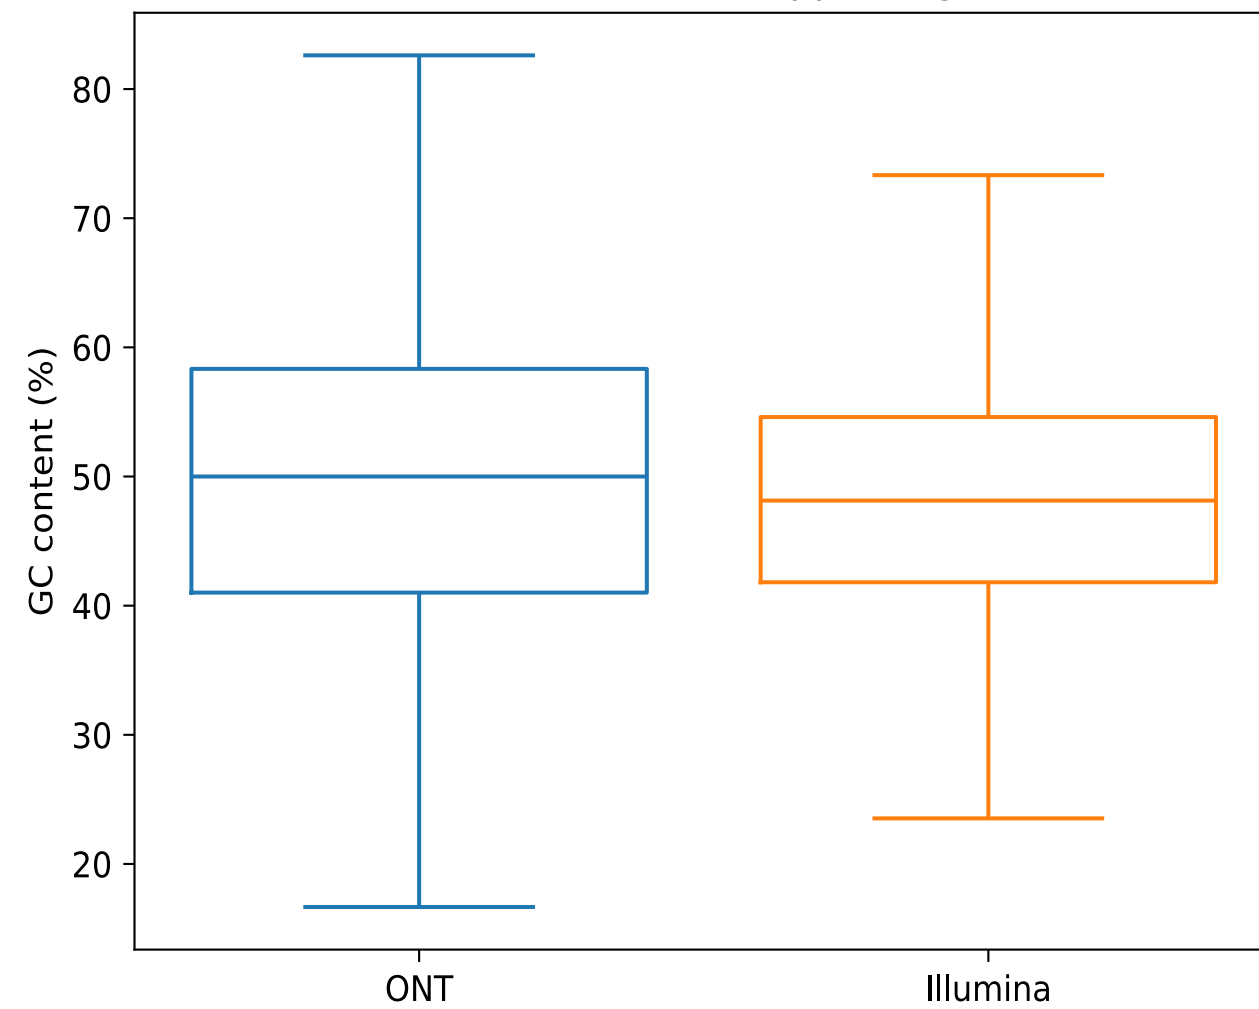

GTEX Brain frontal cortex

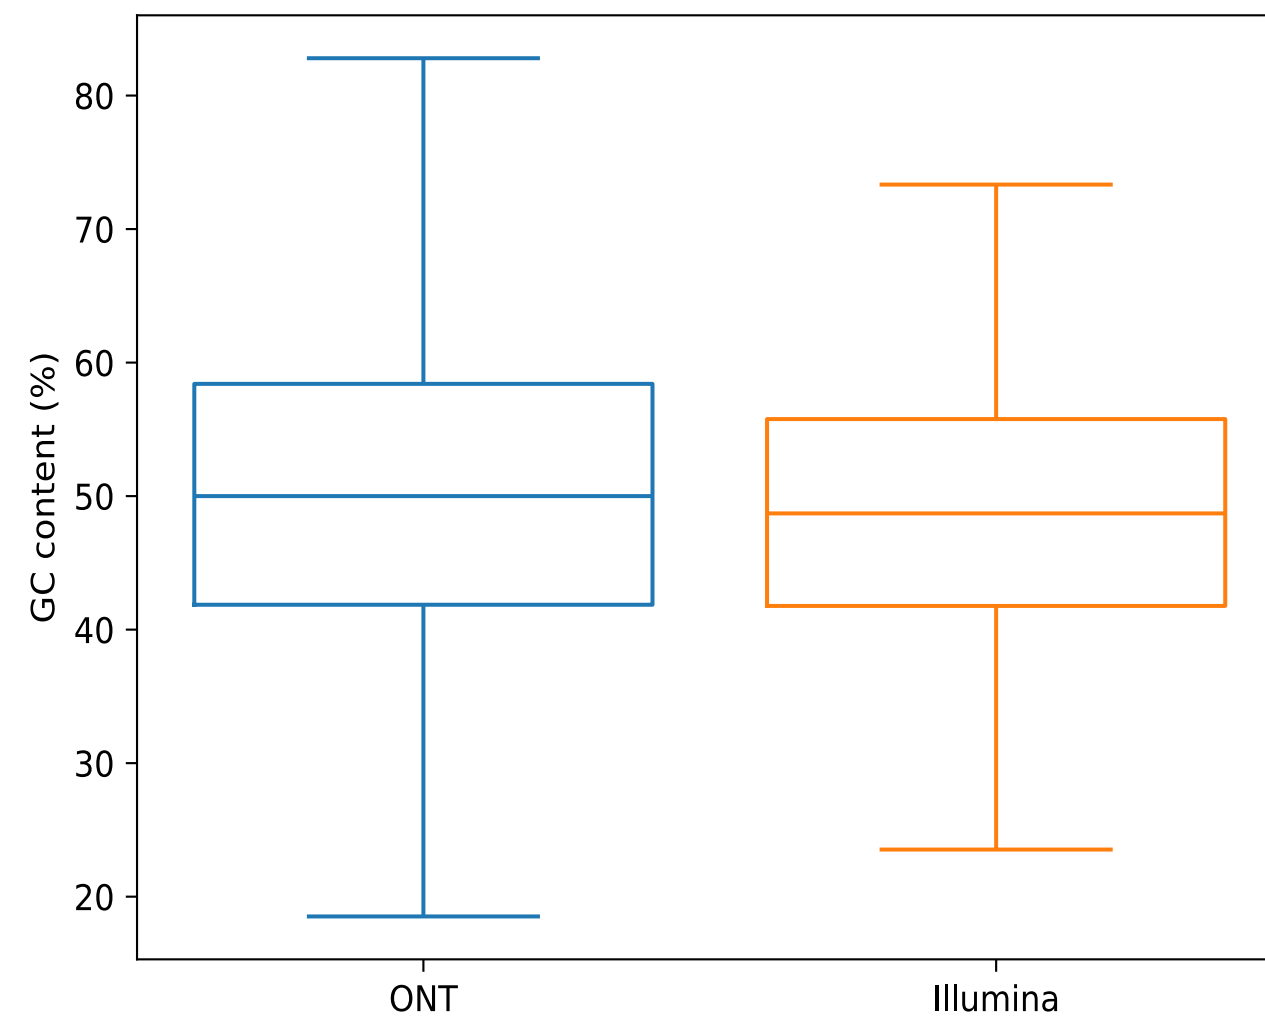

GTEX Liver

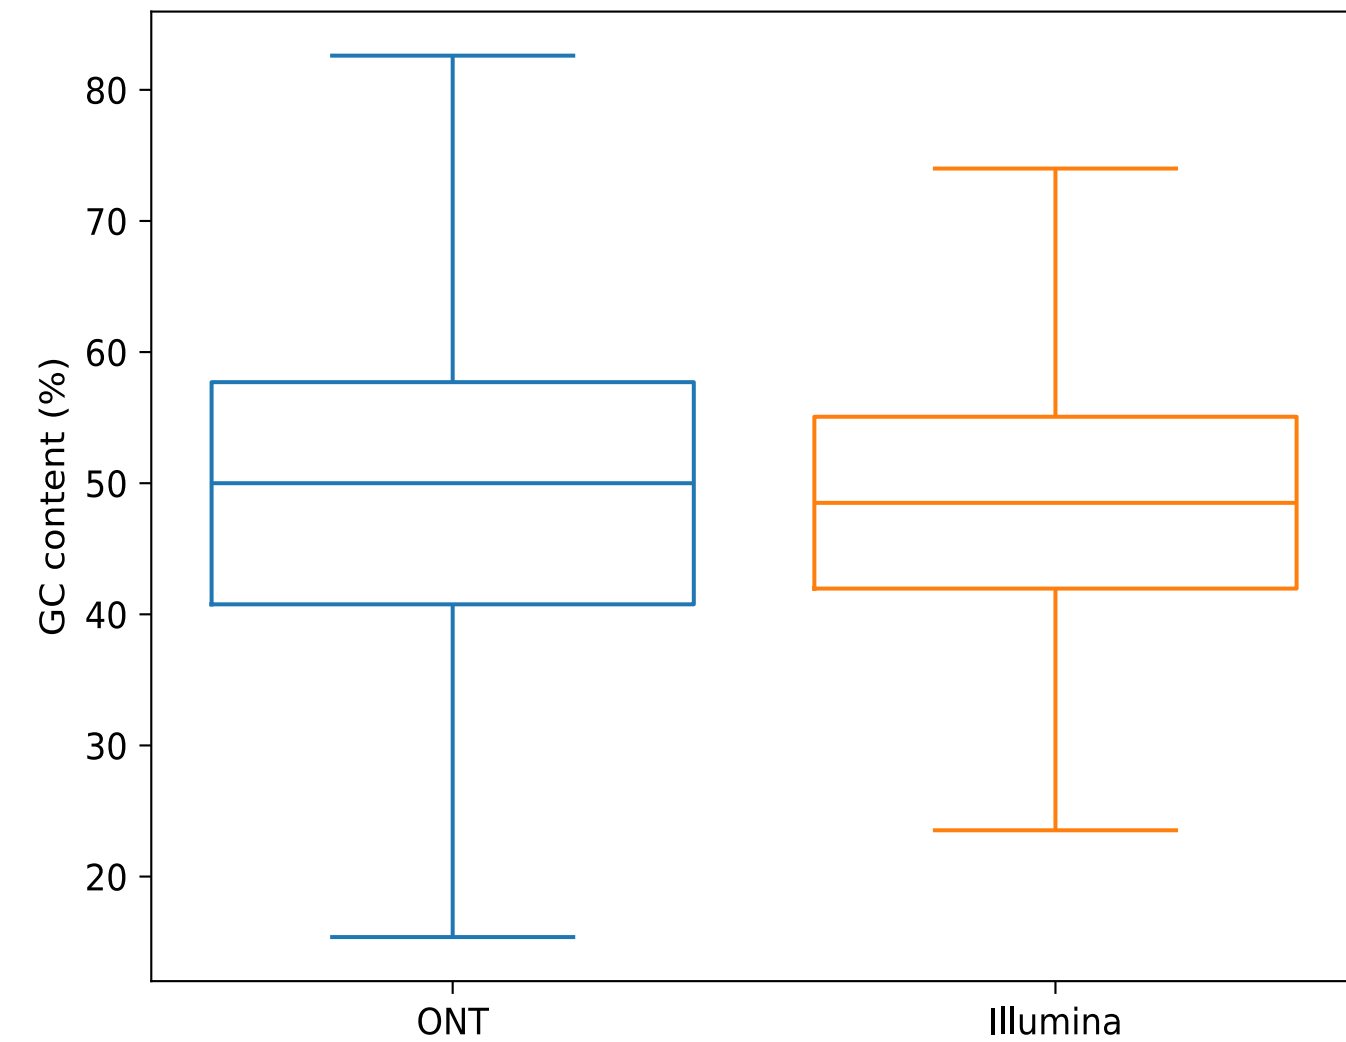

Supplement: Supplemental_code.zip [file Supplemental_Fig_S13.pdf › Supplemental_code/figures/Supplemental_Fig_S13/Supplemental_Fig_S13.pdf]

# GTEx Brain frontal cortex

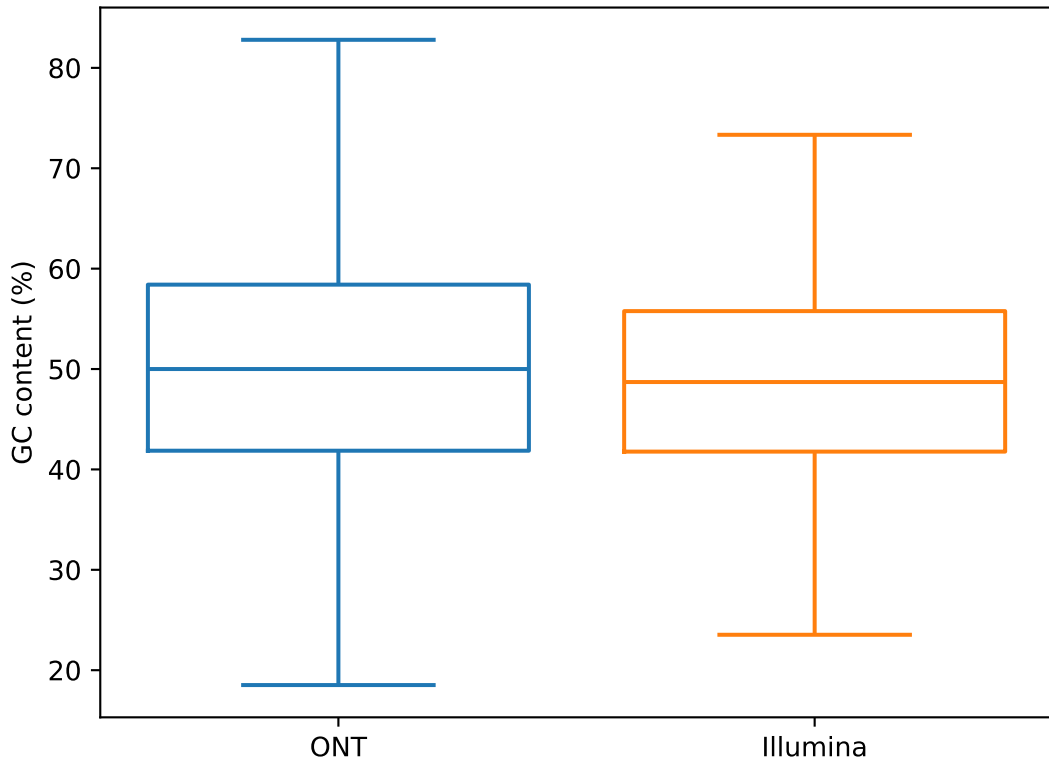

Supplement: Supplemental_code.zip [file Supplemental_Fig_S13_GC_IR_brain.pdf › Supplemental_code/figures/Supplemental_Fig_S13/Supplemental_Fig_S13_GC_IR_brain.pdf]

# GTEx Heart atrial appendage

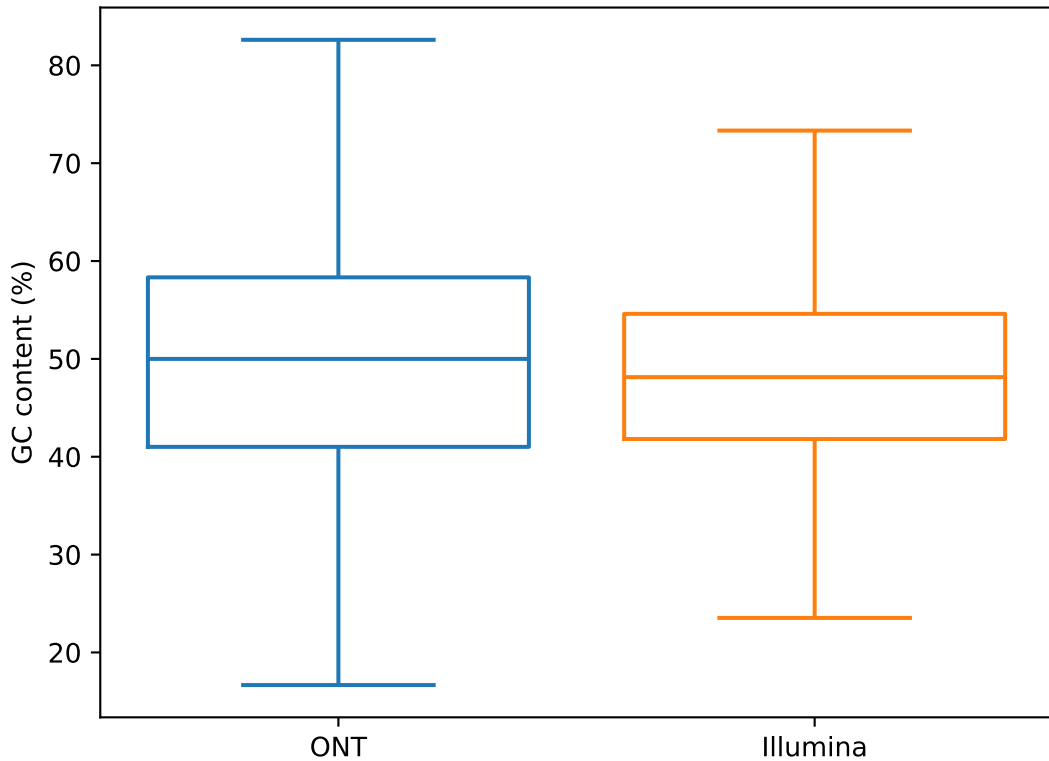

Supplement: Supplemental_code.zip [file Supplemental_Fig_S13_GC_IR_heart.pdf › Supplemental_code/figures/Supplemental_Fig_S13/Supplemental_Fig_S13_GC_IR_heart.pdf]

# GTEX Liver

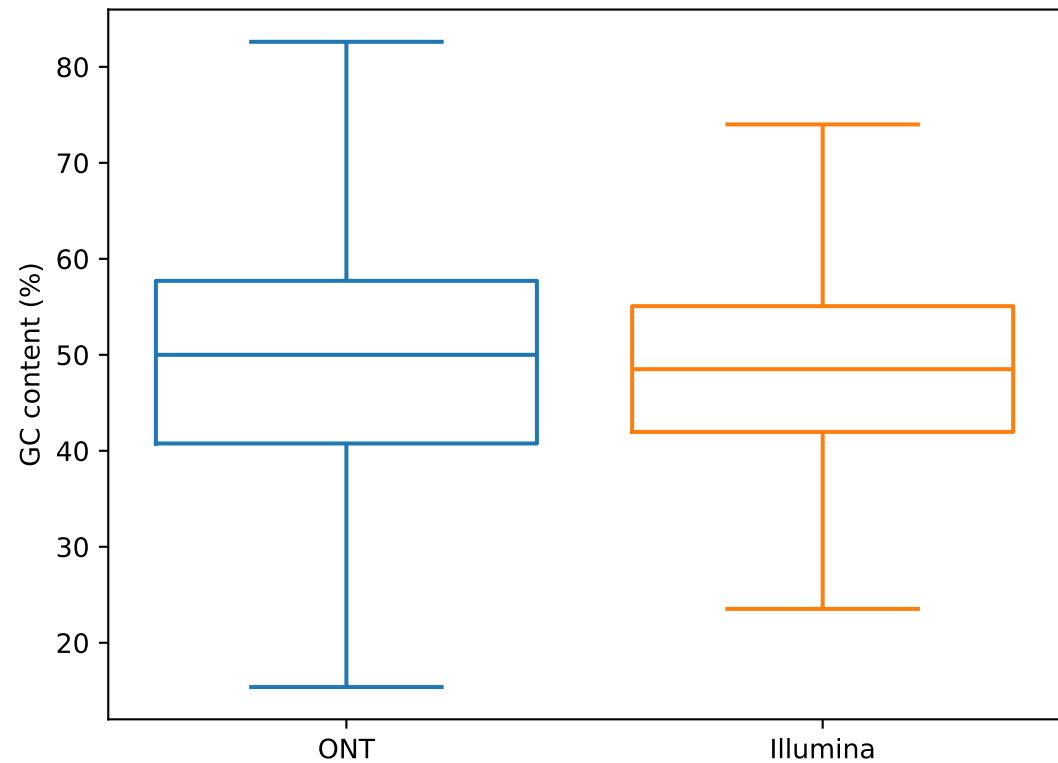

Supplement: Supplemental_code.zip [file Supplemental_Fig_S13_GC_IR_liver.pdf › Supplemental_code/figures/Supplemental_Fig_S13/Supplemental_Fig_S13_GC_IR_liver.pdf]

Before employing  
cutoff

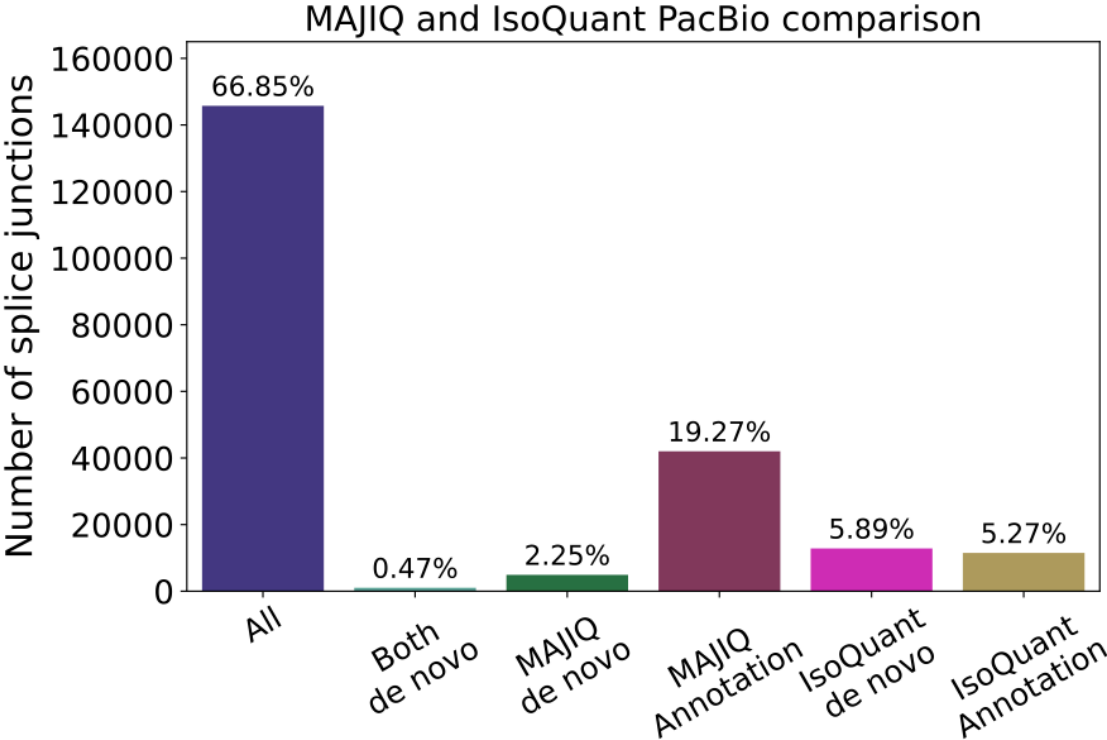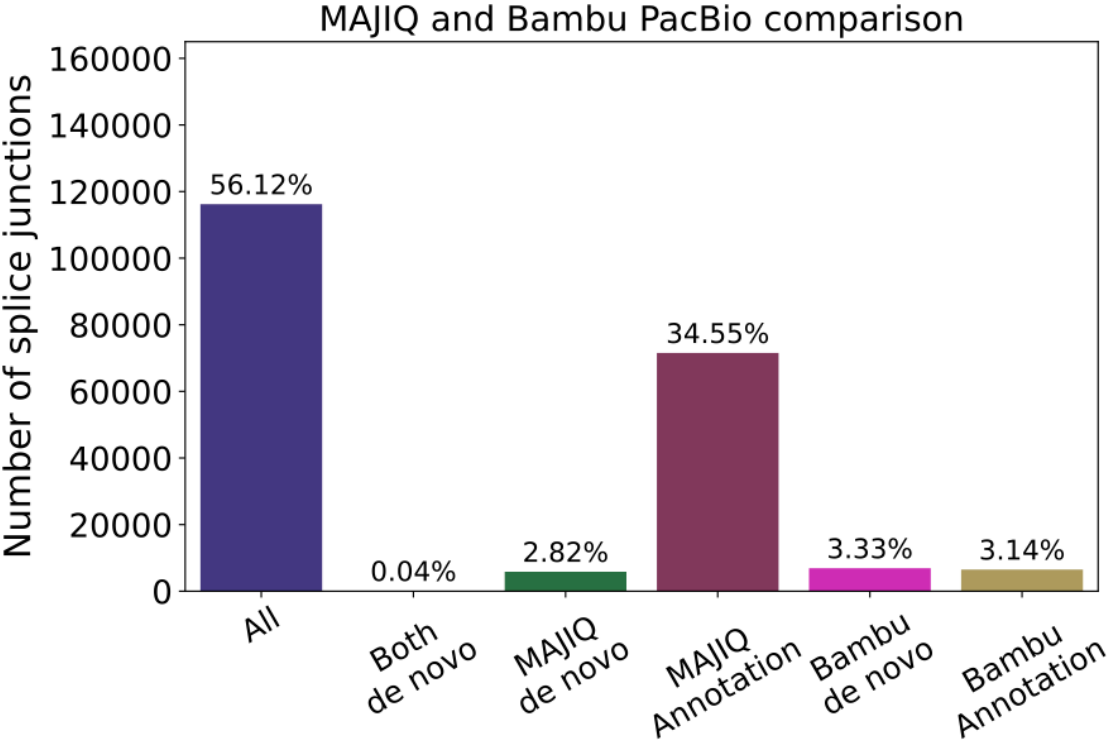

After employing  
cutoff

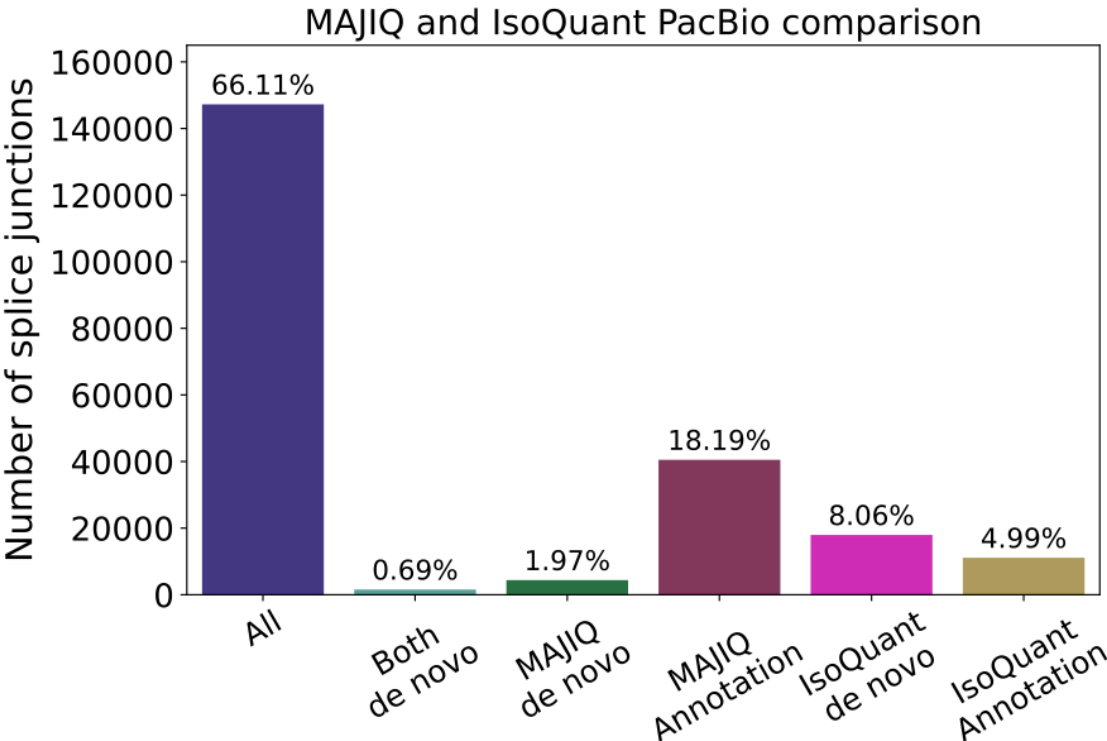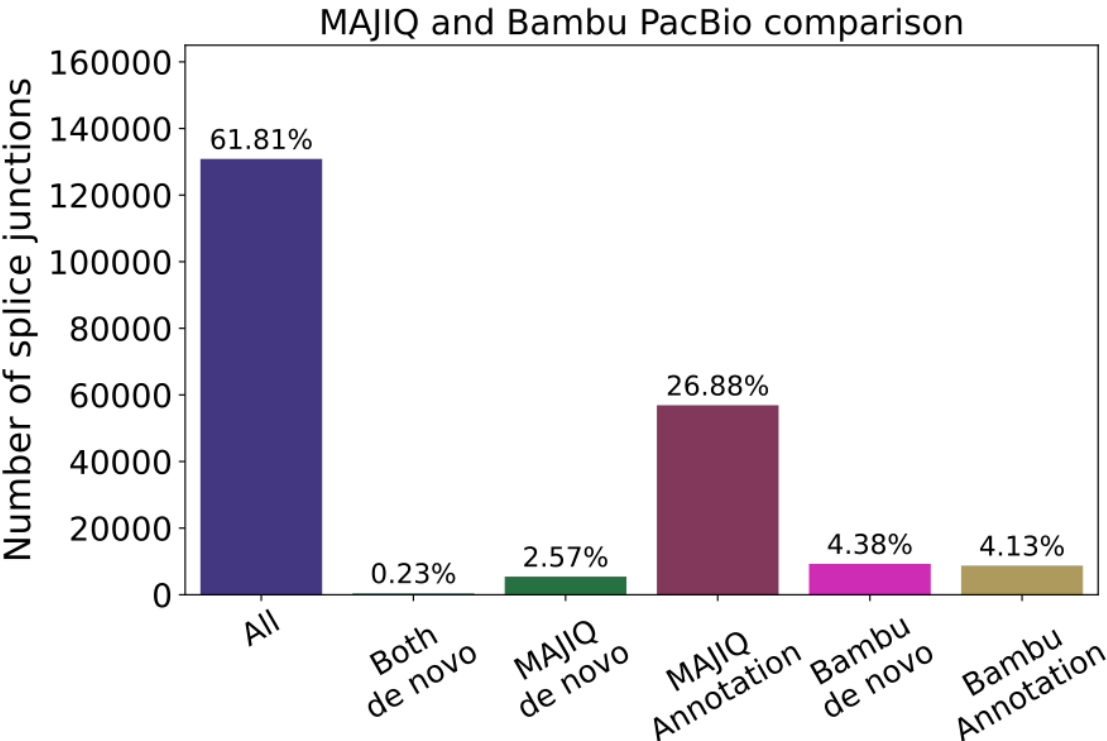

Supplement: Supplemental_code.zip [file Supplemental_Fig_S14.pdf › Supplemental_code/figures/Supplemental_Fig_S14/Supplemental_Fig_S14.pdf]

MAJIQ and Bambu PacBio comparison

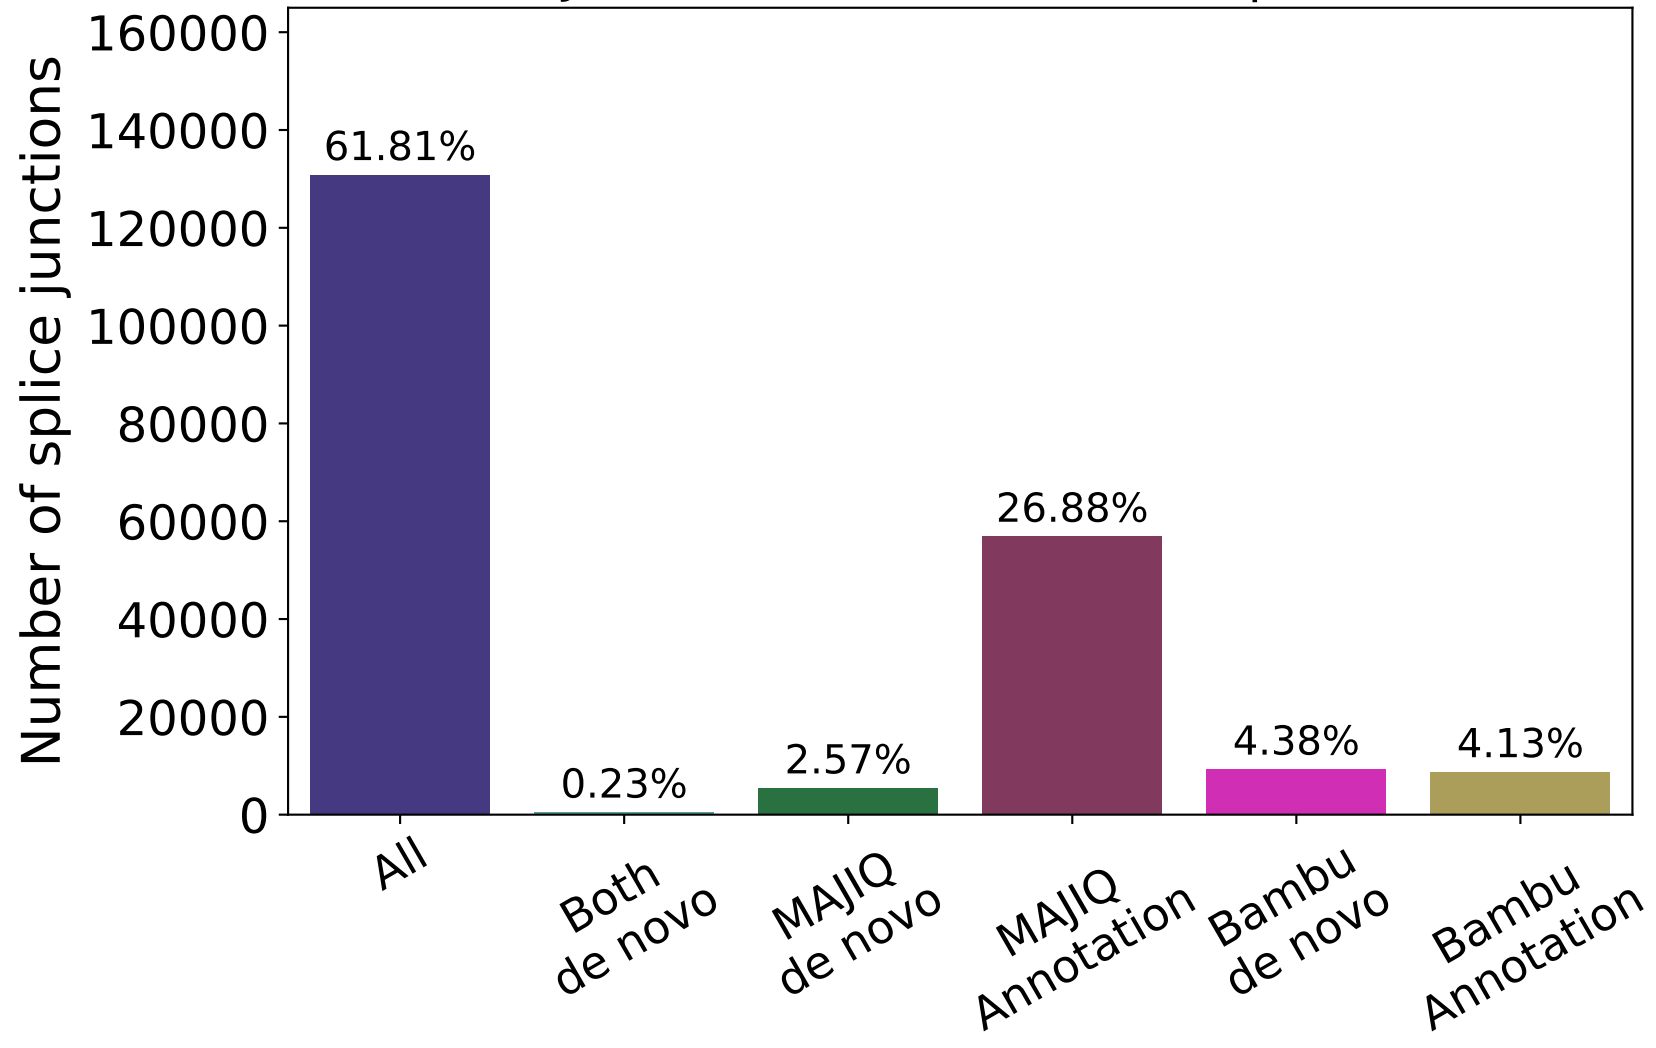

Supplement: Supplemental_code.zip [file Supplemental_Fig_S14_bambu_pcb1_after_cutoff.pdf › Supplemental_code/figures/Supplemental_Fig_S14/Supplemental_Fig_S14_bambu_pcb1_after_cutoff.pdf]

MAJIQ and Bambu PacBio comparison

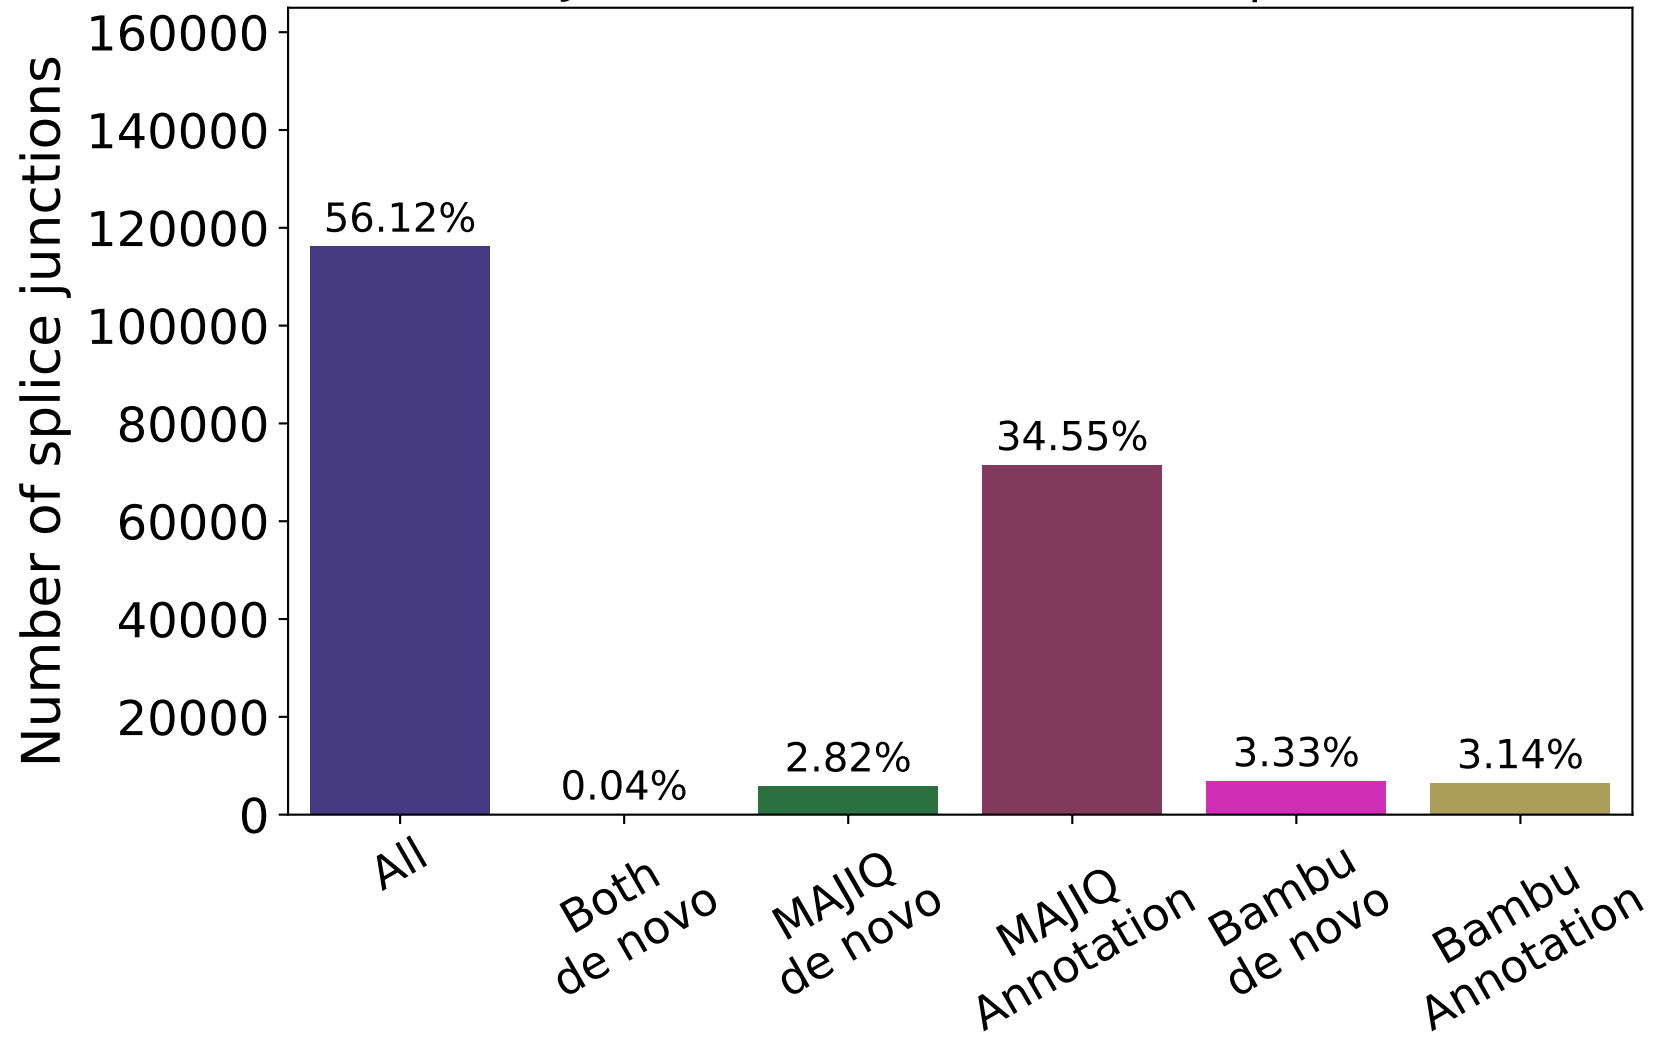

Supplement: Supplemental_code.zip [file Supplemental_Fig_S14_bambu_pcb1_before_cutoff.pdf › Supplemental_code/figures/Supplemental_Fig_S14/Supplemental_Fig_S14_bambu_pcb1_before_cutoff.pdf]

MAJIQ and IsoQuant PacBio comparison

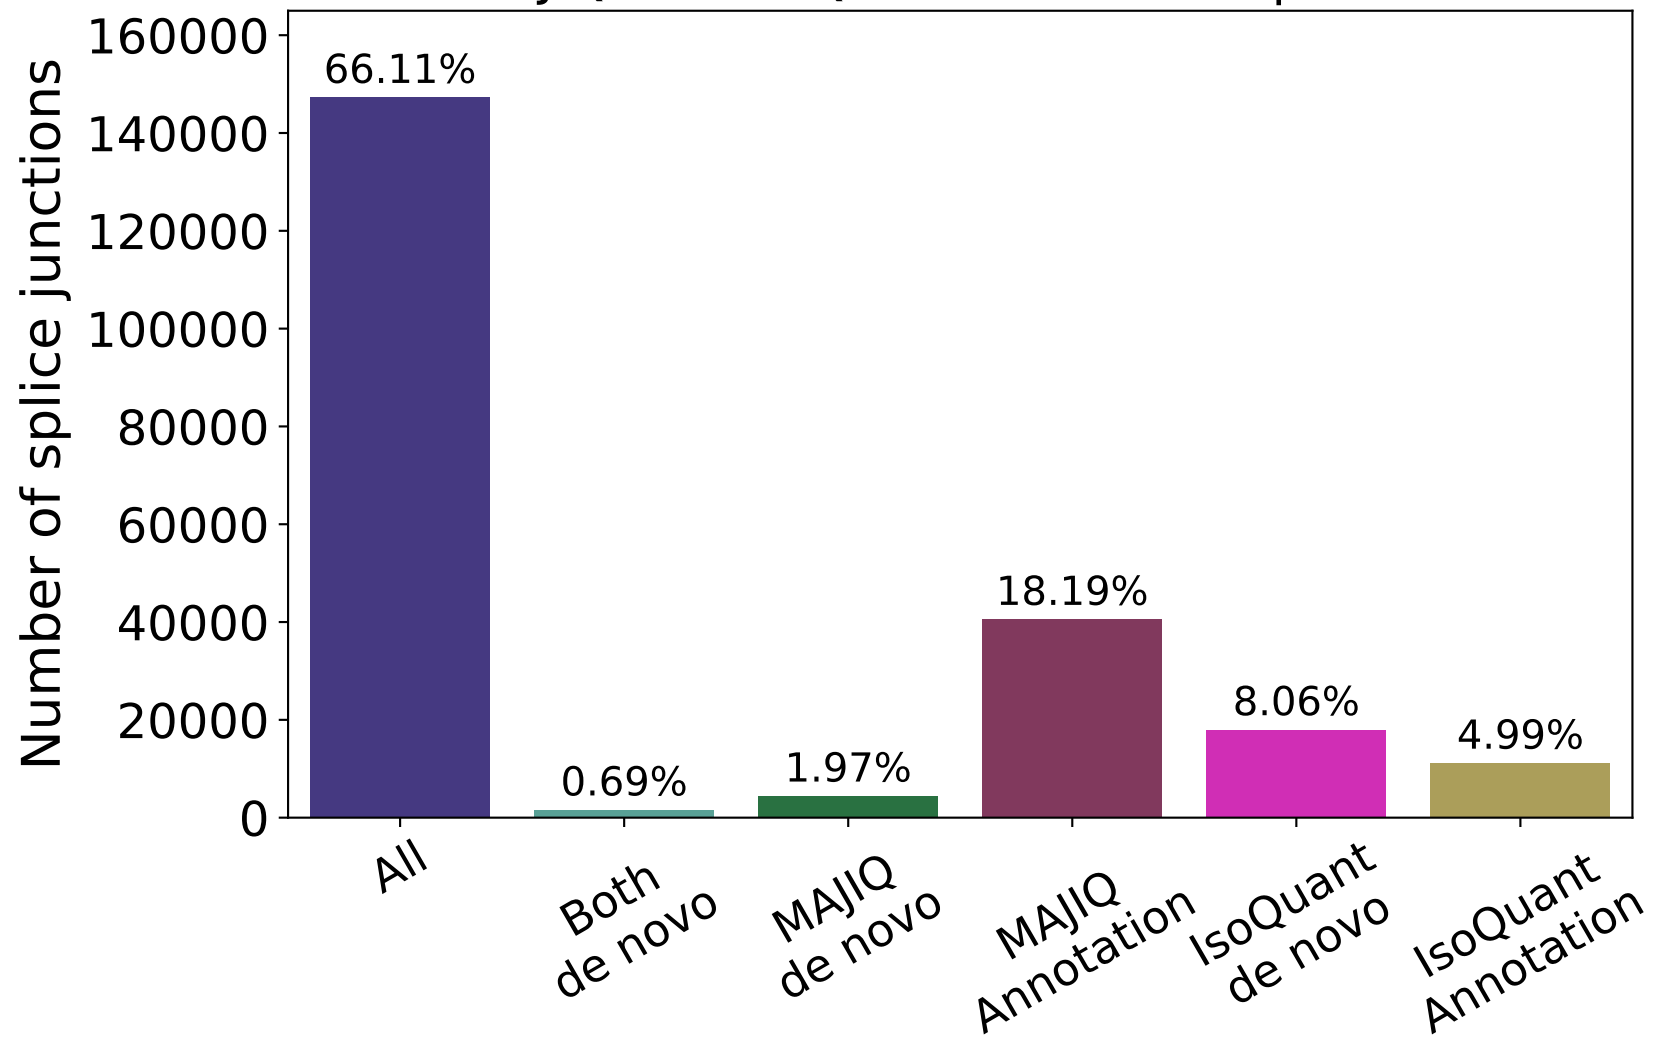

Supplement: Supplemental_code.zip [file Supplemental_Fig_S14_isq_pcb1_after_cutoff.pdf › Supplemental_code/figures/Supplemental_Fig_S14/Supplemental_Fig_S14_isq_pcb1_after_cutoff.pdf]

MAJIQ and IsoQuant PacBio comparison

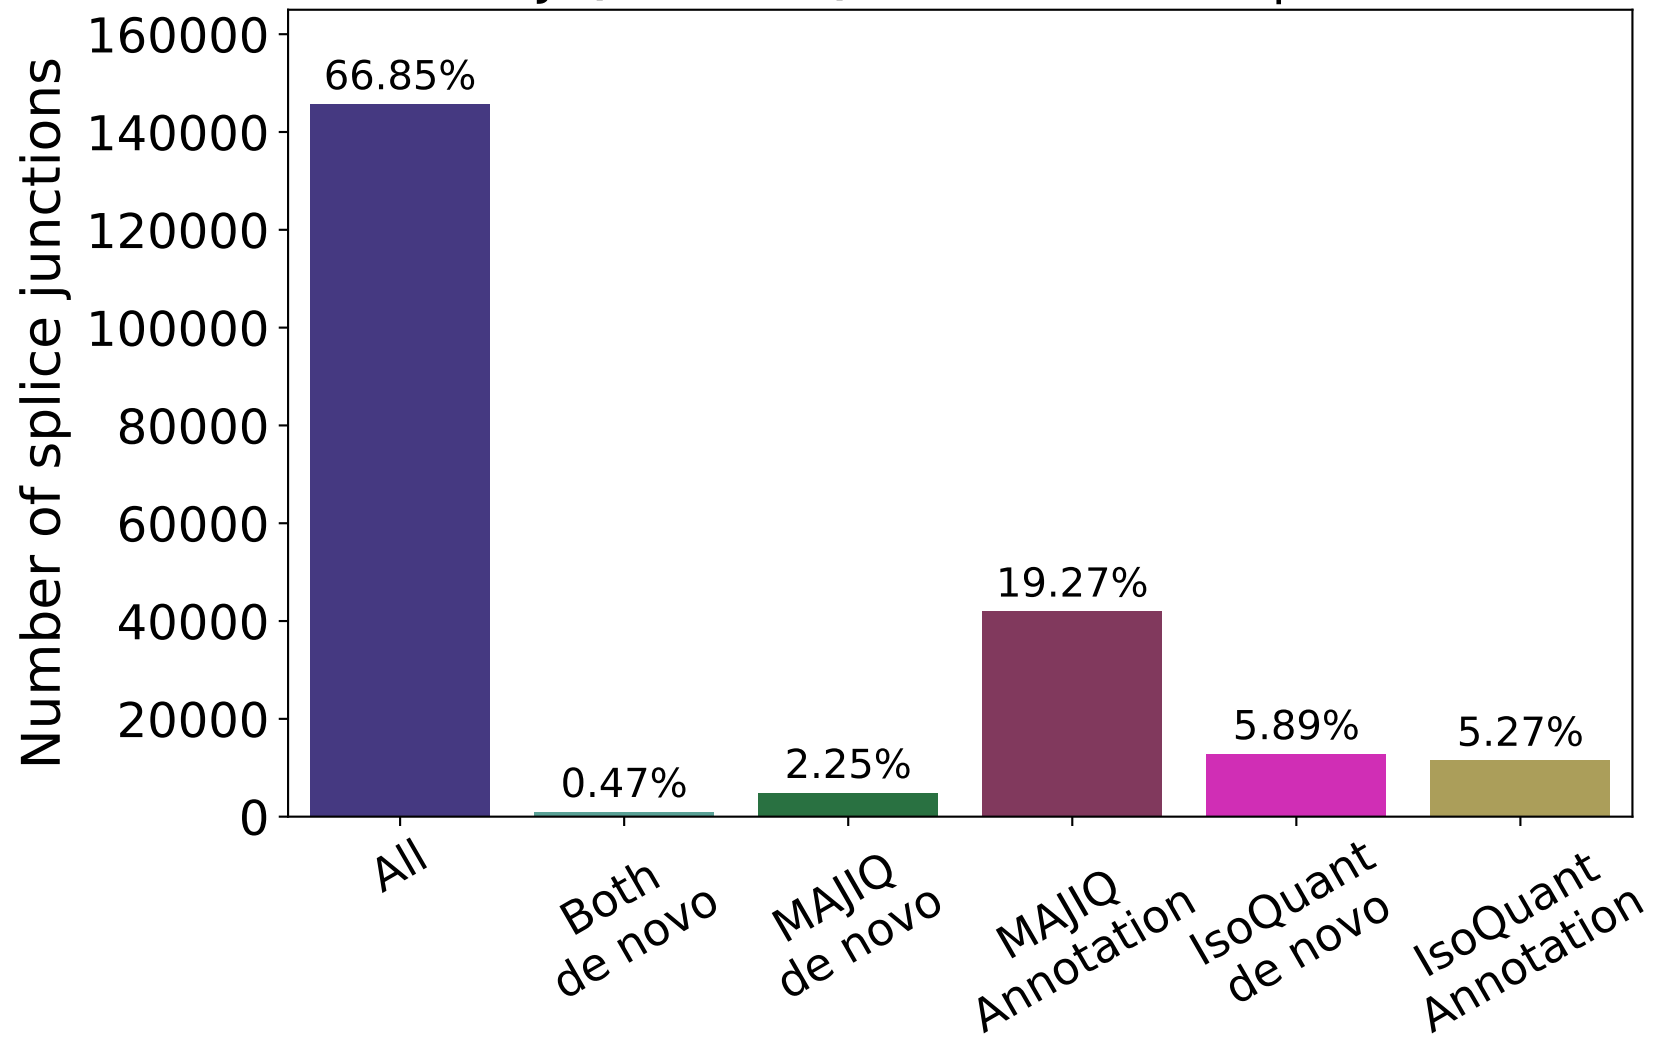

Supplement: Supplemental_code.zip [file Supplemental_Fig_S14_isq_pcb1_before_cutoff.pdf › Supplemental_code/figures/Supplemental_Fig_S14/Supplemental_Fig_S14_isq_pcb1_before_cutoff.pdf]

# GTEX Brain frontal cortex MAJIQ and FLAIR ONT comparison

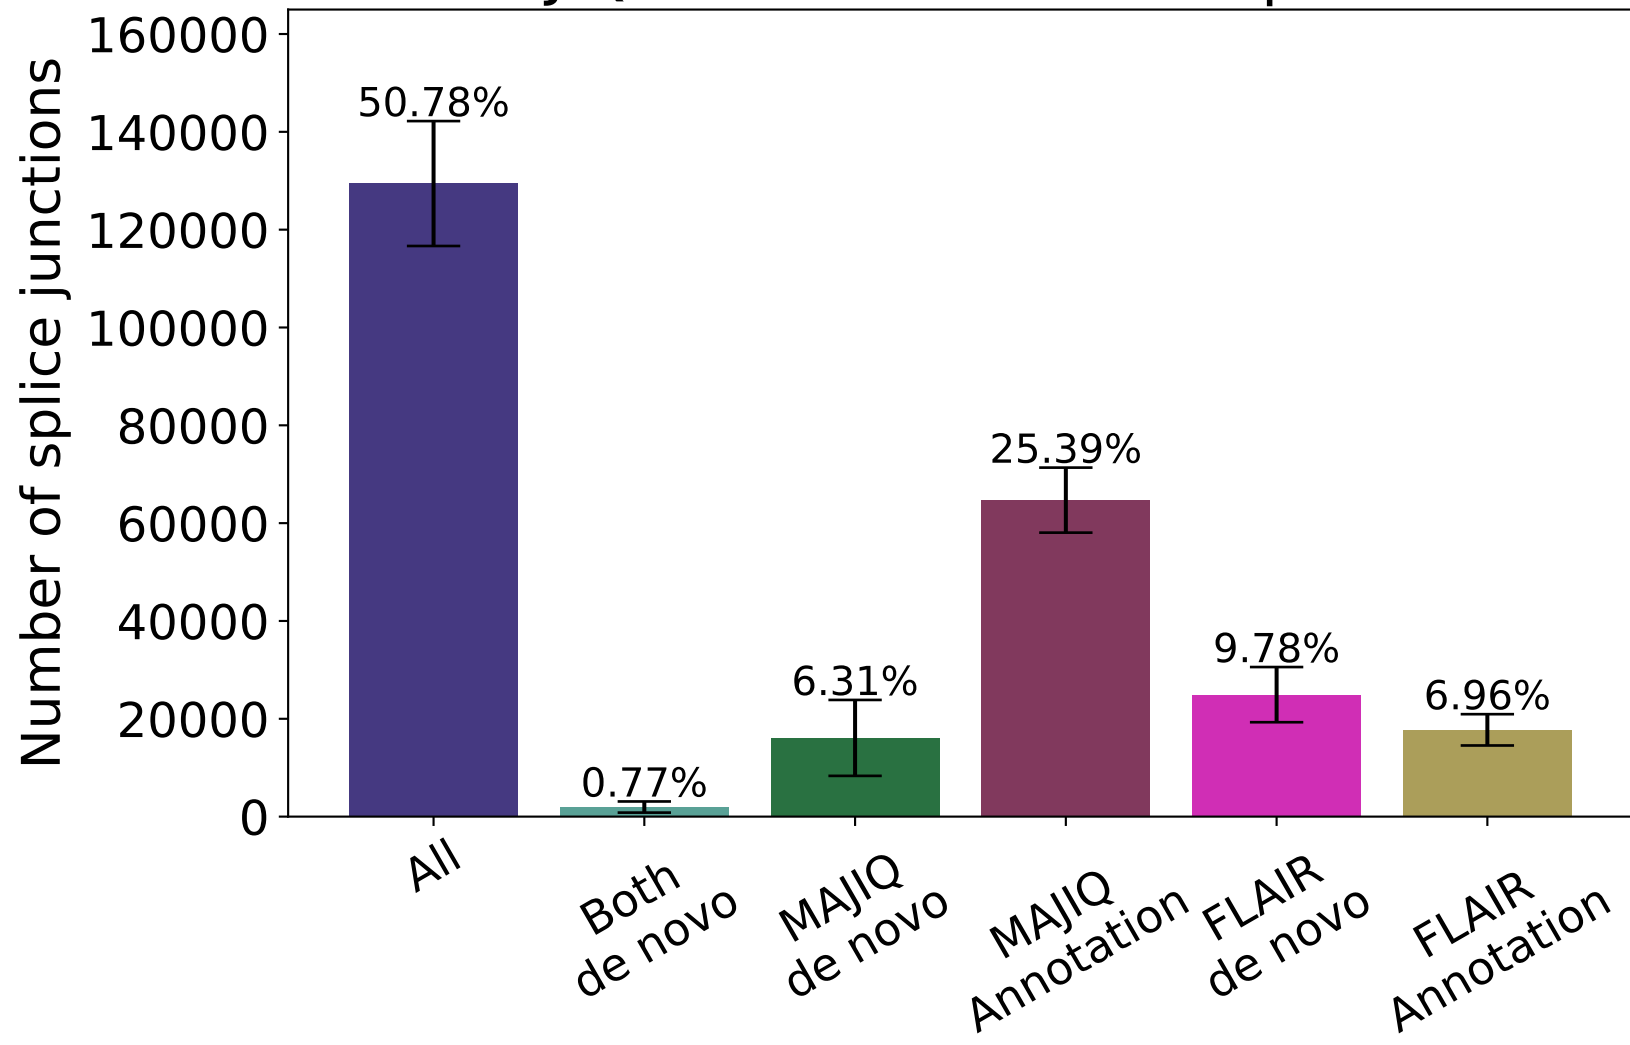

Supplement: Supplemental_code.zip [file Supplemental_Fig_S2A_brain_pre.pdf › Supplemental_code/figures/Supplemental_Fig_S2/Supplemental_Fig_S2A_brain_pre.pdf]

# GTEX Heart atrial appendage MAJIQ and FLAIR ONT comparison

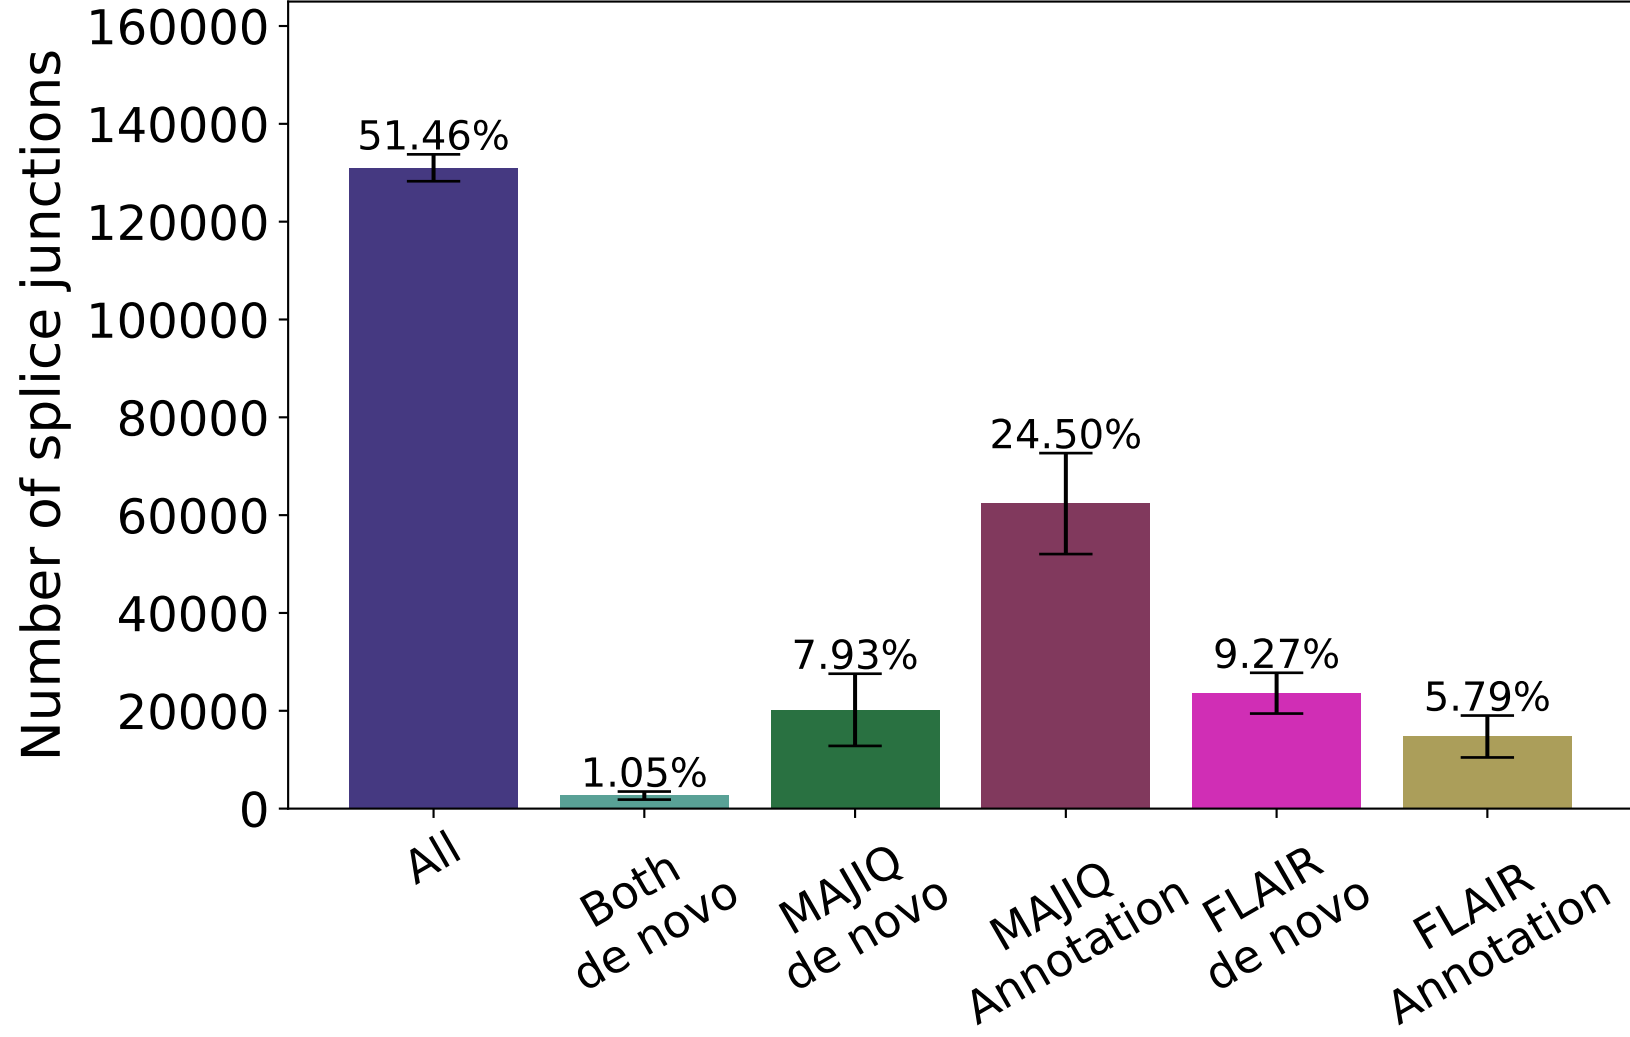

Supplement: Supplemental_code.zip [file Supplemental_Fig_S2A_heart_pre.pdf › Supplemental_code/figures/Supplemental_Fig_S2/Supplemental_Fig_S2A_heart_pre.pdf]

# GTEX Liver

## MAJIQ and FLAIR ONT comparison

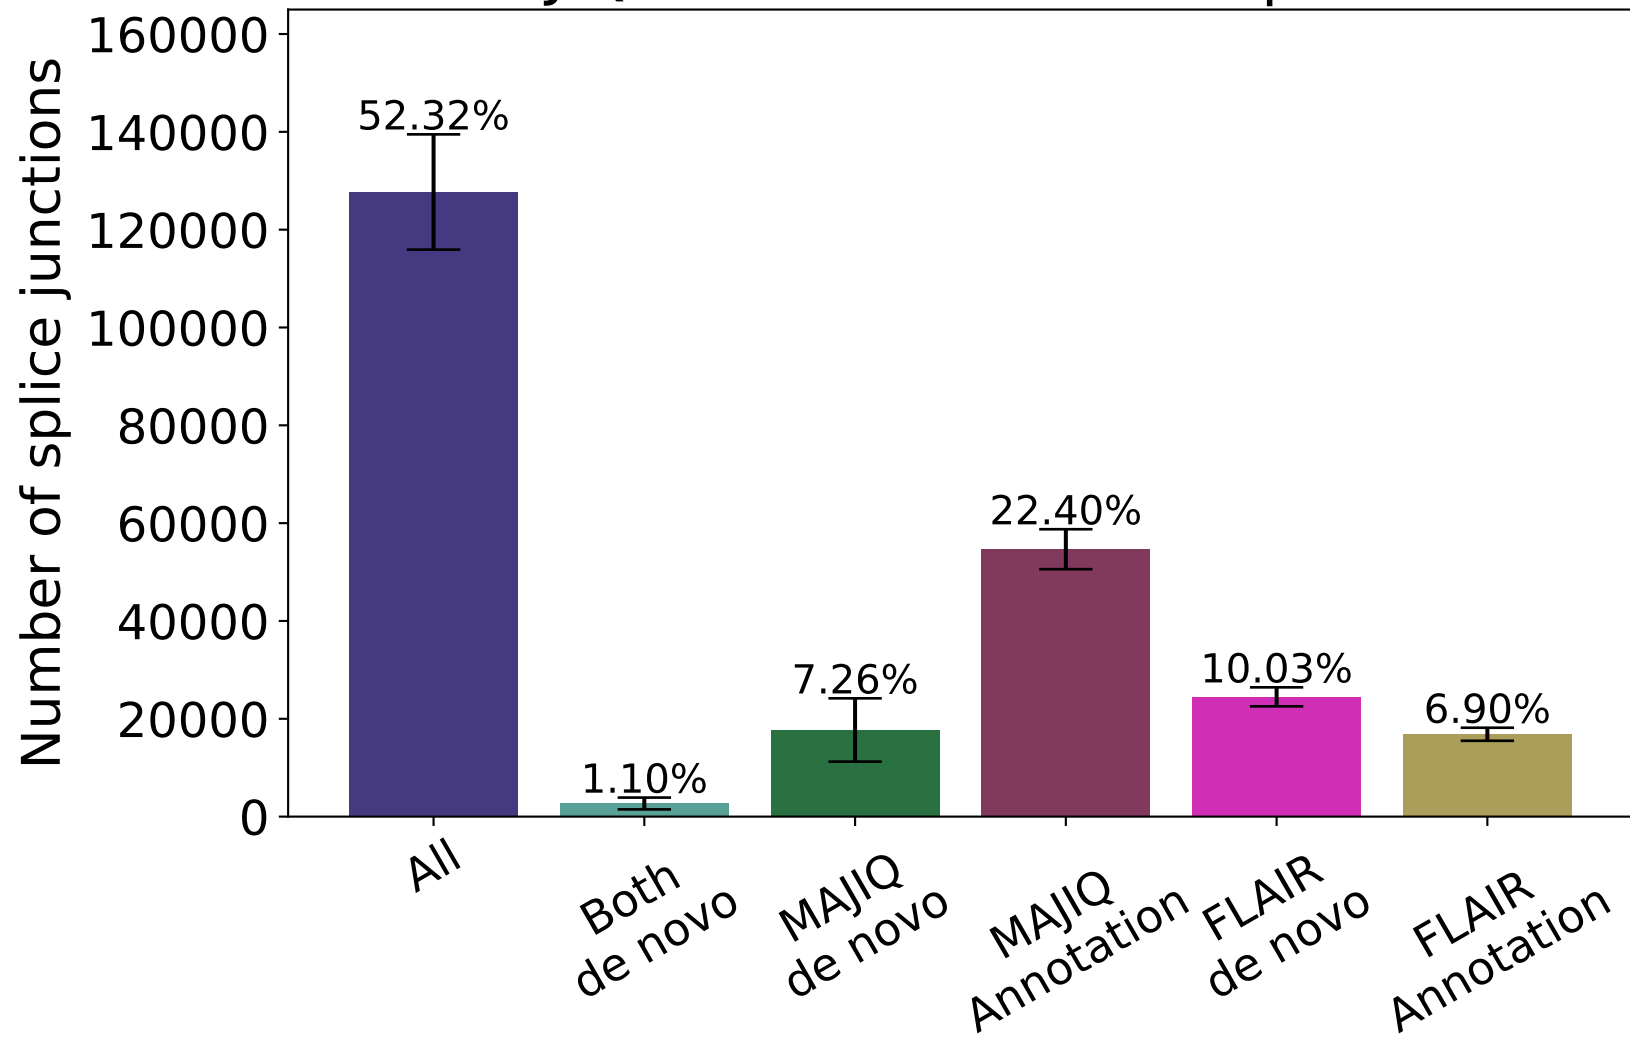

Supplement: Supplemental_code.zip [file Supplemental_Fig_S2A_liver_pre.pdf › Supplemental_code/figures/Supplemental_Fig_S2/Supplemental_Fig_S2A_liver_pre.pdf]

# MAJIQ and Bambu ONT comparison

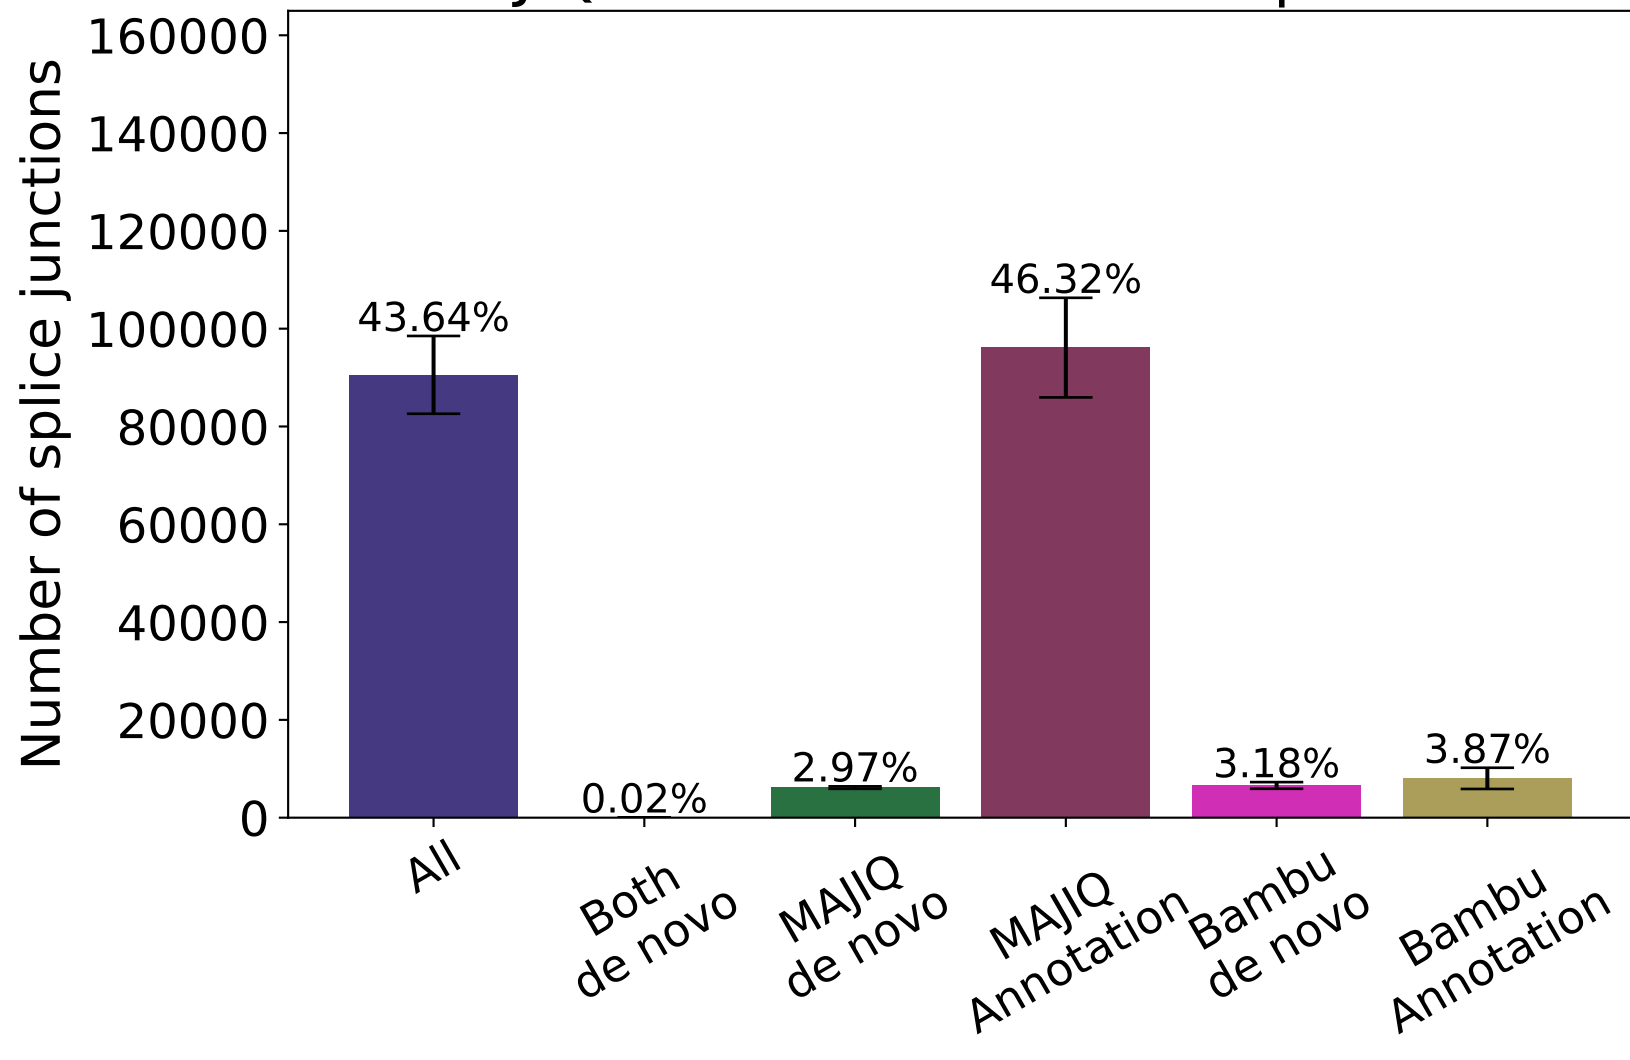

Supplement: Supplemental_code.zip [file Supplemental_Fig_S2B_bambu_ont_pre.pdf › Supplemental_code/figures/Supplemental_Fig_S2/Supplemental_Fig_S2B_bambu_ont_pre.pdf]

# MAJIQ and Bambu PacBio comparison

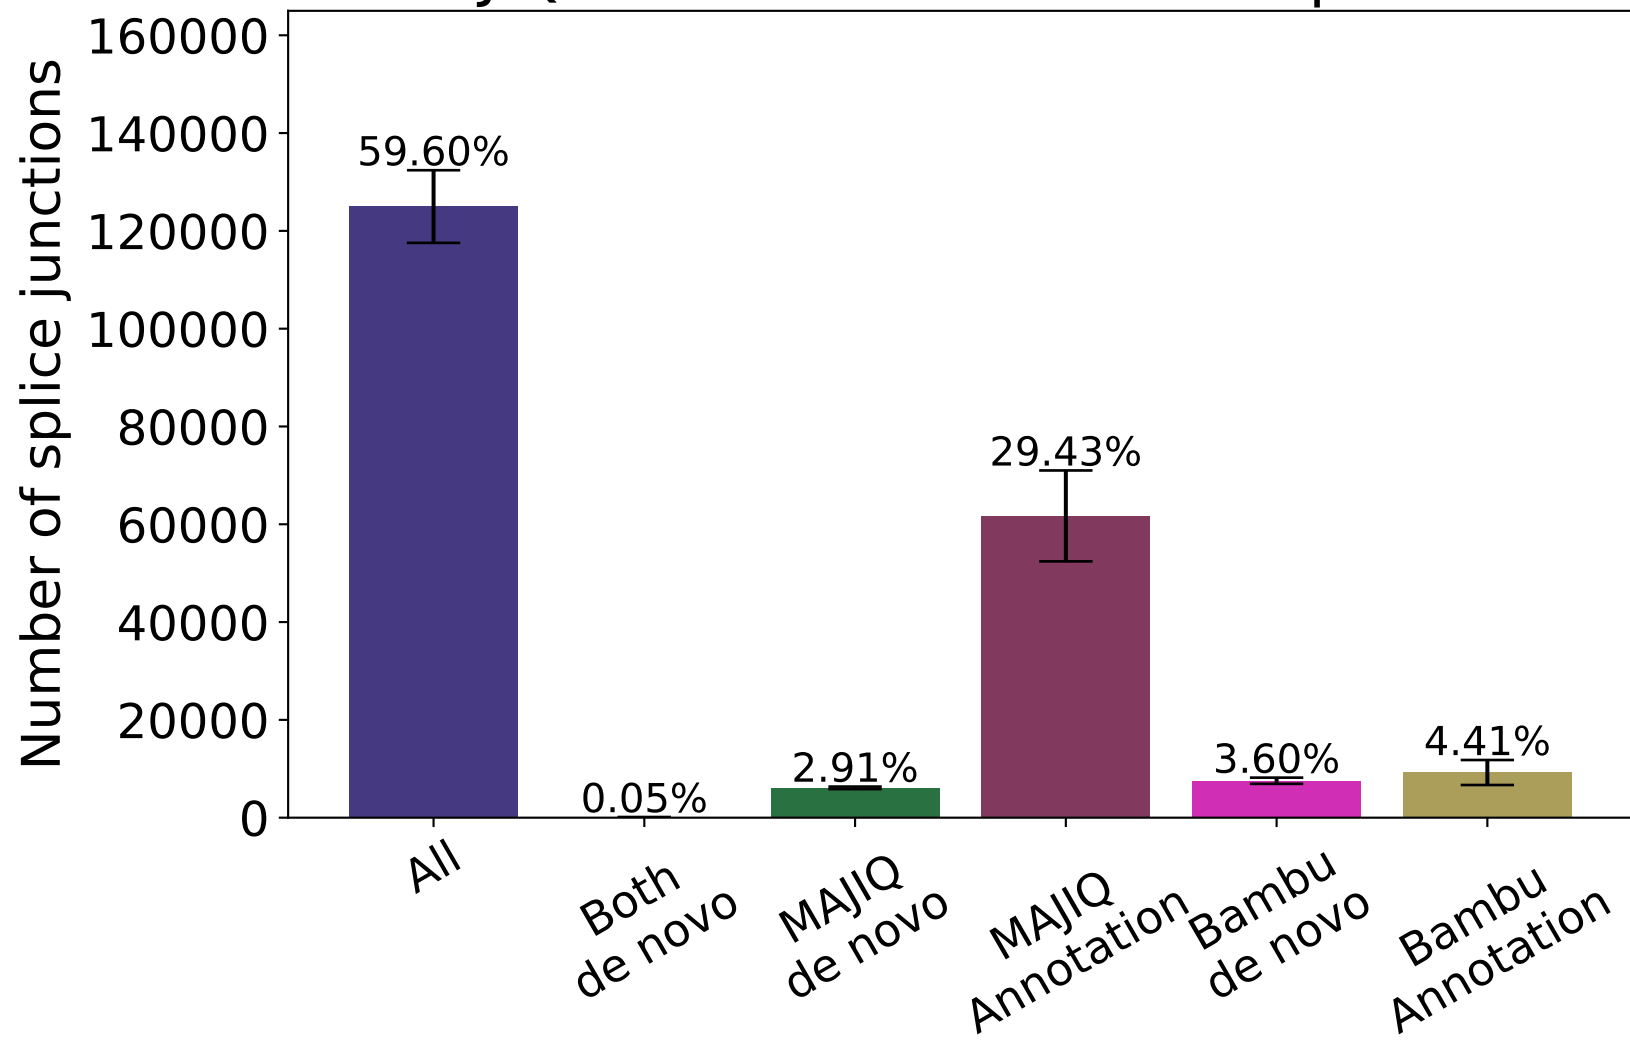

Supplement: Supplemental_code.zip [file Supplemental_Fig_S2B_bambu_pcb_pre.pdf › Supplemental_code/figures/Supplemental_Fig_S2/Supplemental_Fig_S2B_bambu_pcb_pre.pdf]

# MAJIQ and ESPRESSO OMT comparison

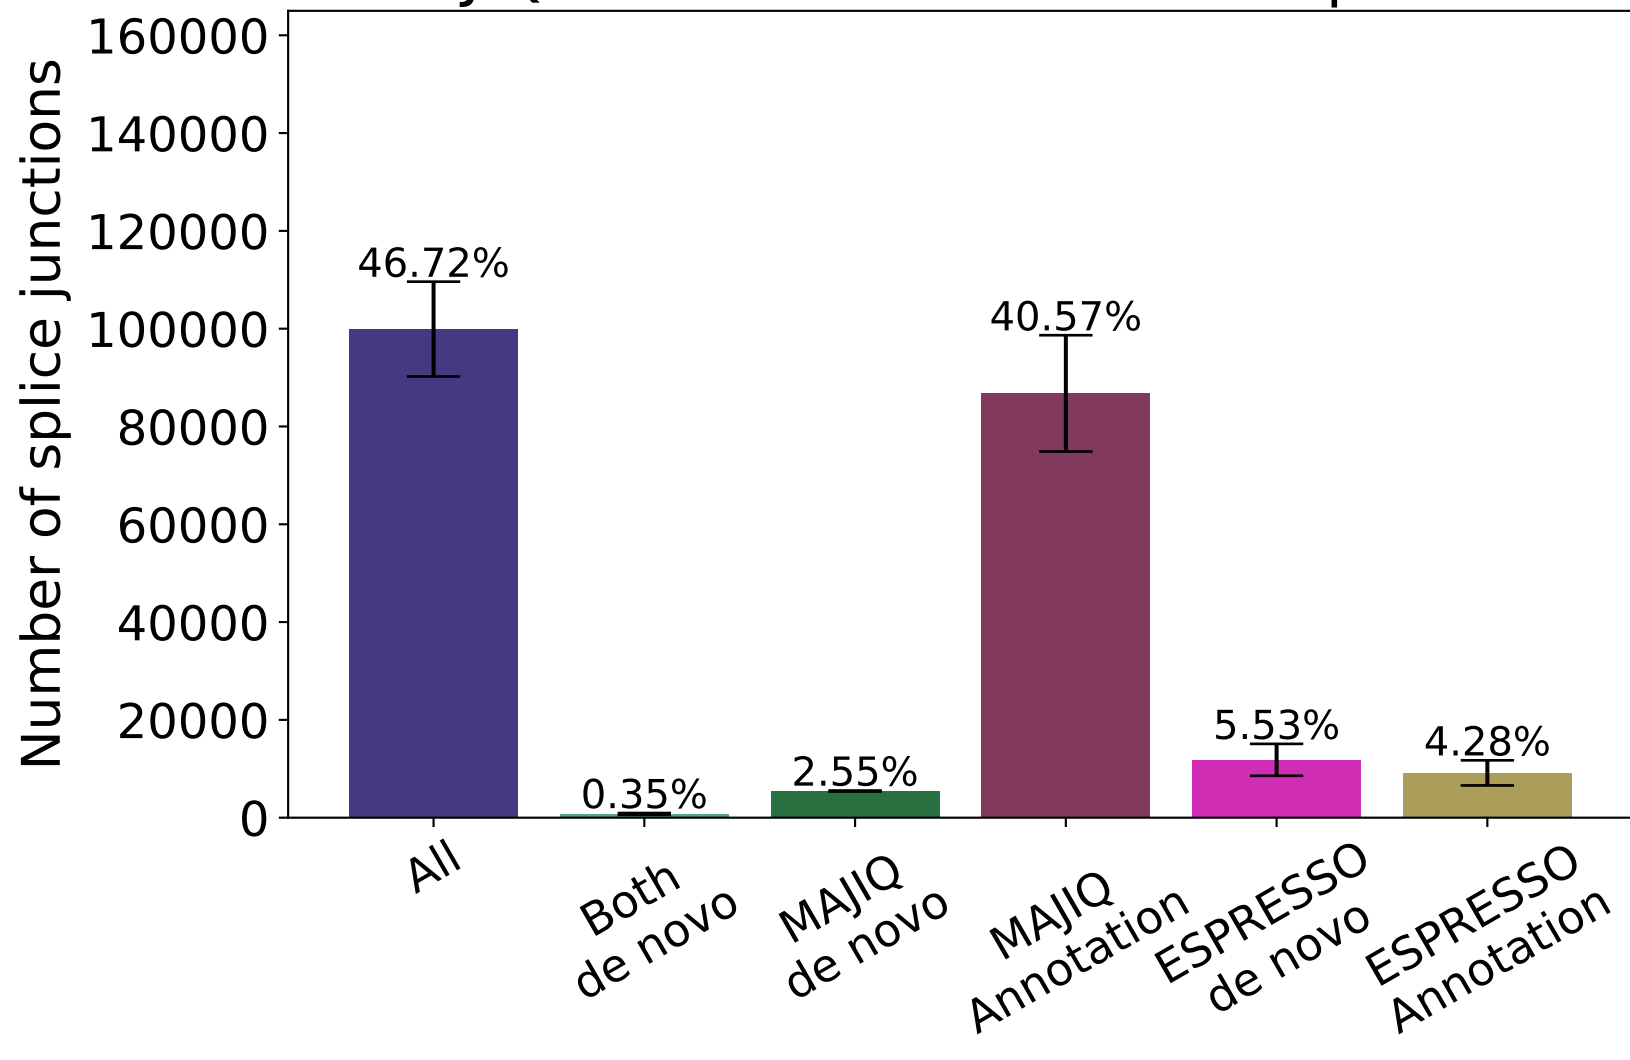

Supplement: Supplemental_code.zip [file Supplemental_Fig_S2B_esp_ont_pre.pdf › Supplemental_code/figures/Supplemental_Fig_S2/Supplemental_Fig_S2B_esp_ont_pre.pdf]

# MAJIQ and ESPRESSO PacBio comparison

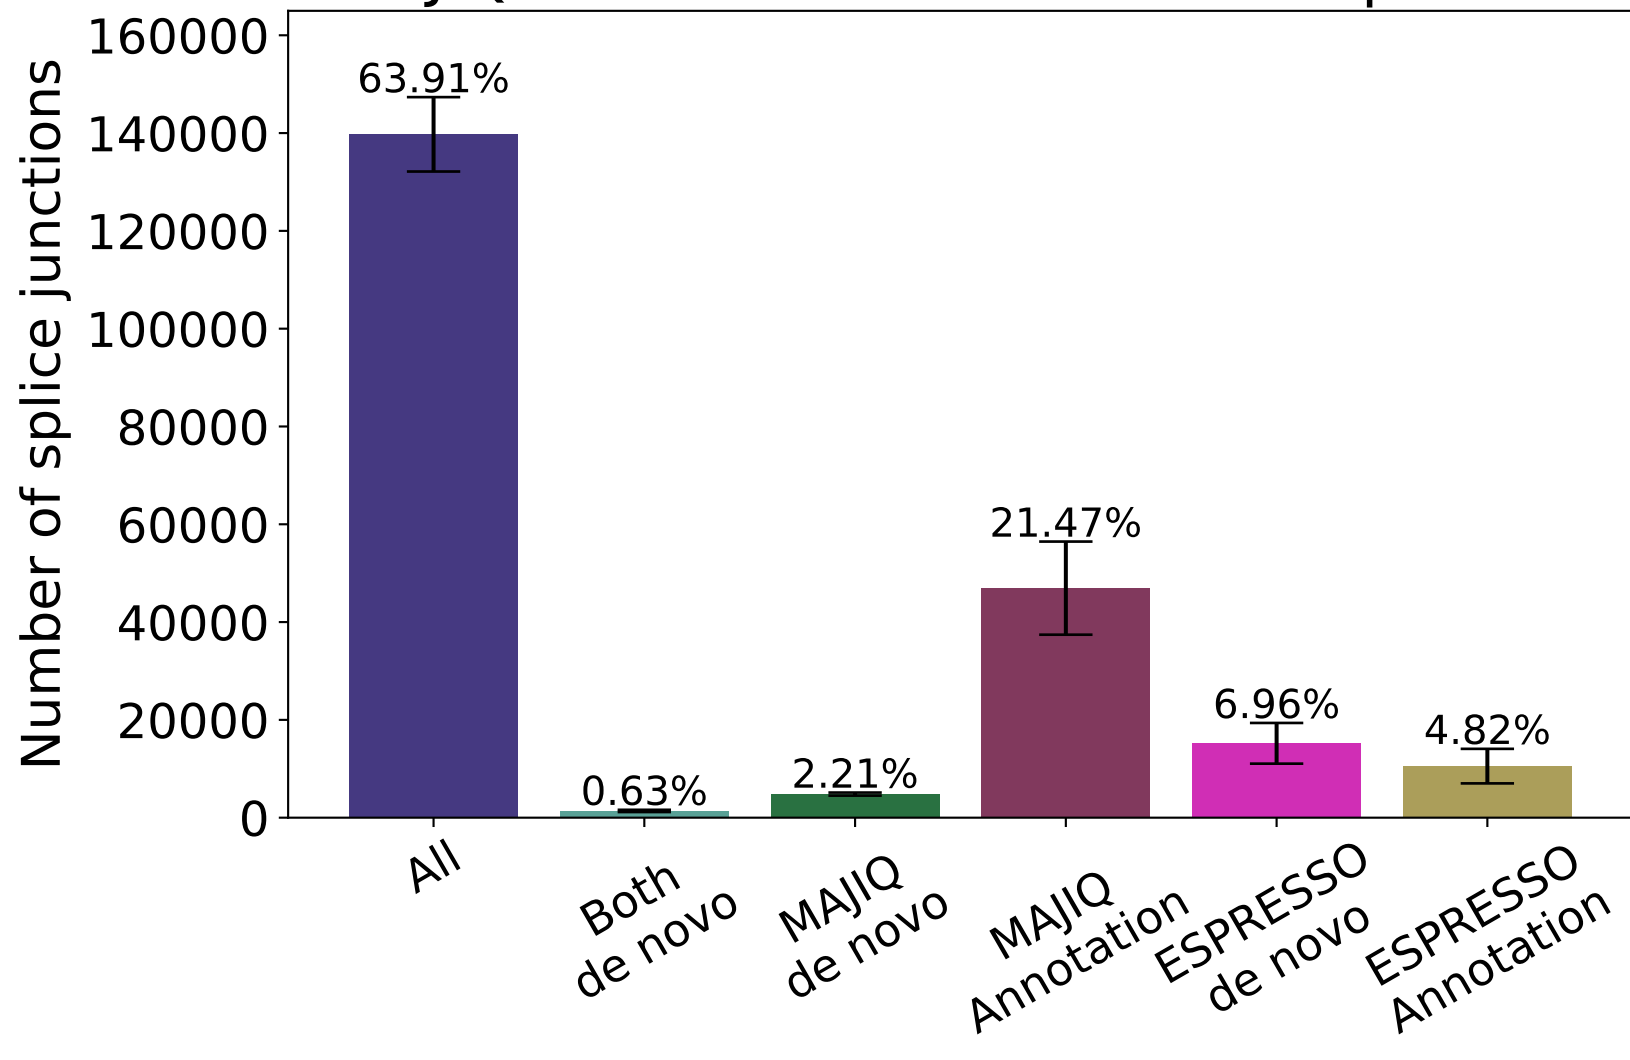

Supplement: Supplemental_code.zip [file Supplemental_Fig_S2B_esp_pcb_pre.pdf › Supplemental_code/figures/Supplemental_Fig_S2/Supplemental_Fig_S2B_esp_pcb_pre.pdf]

# MAJIQ and FLAIR ONT comparison

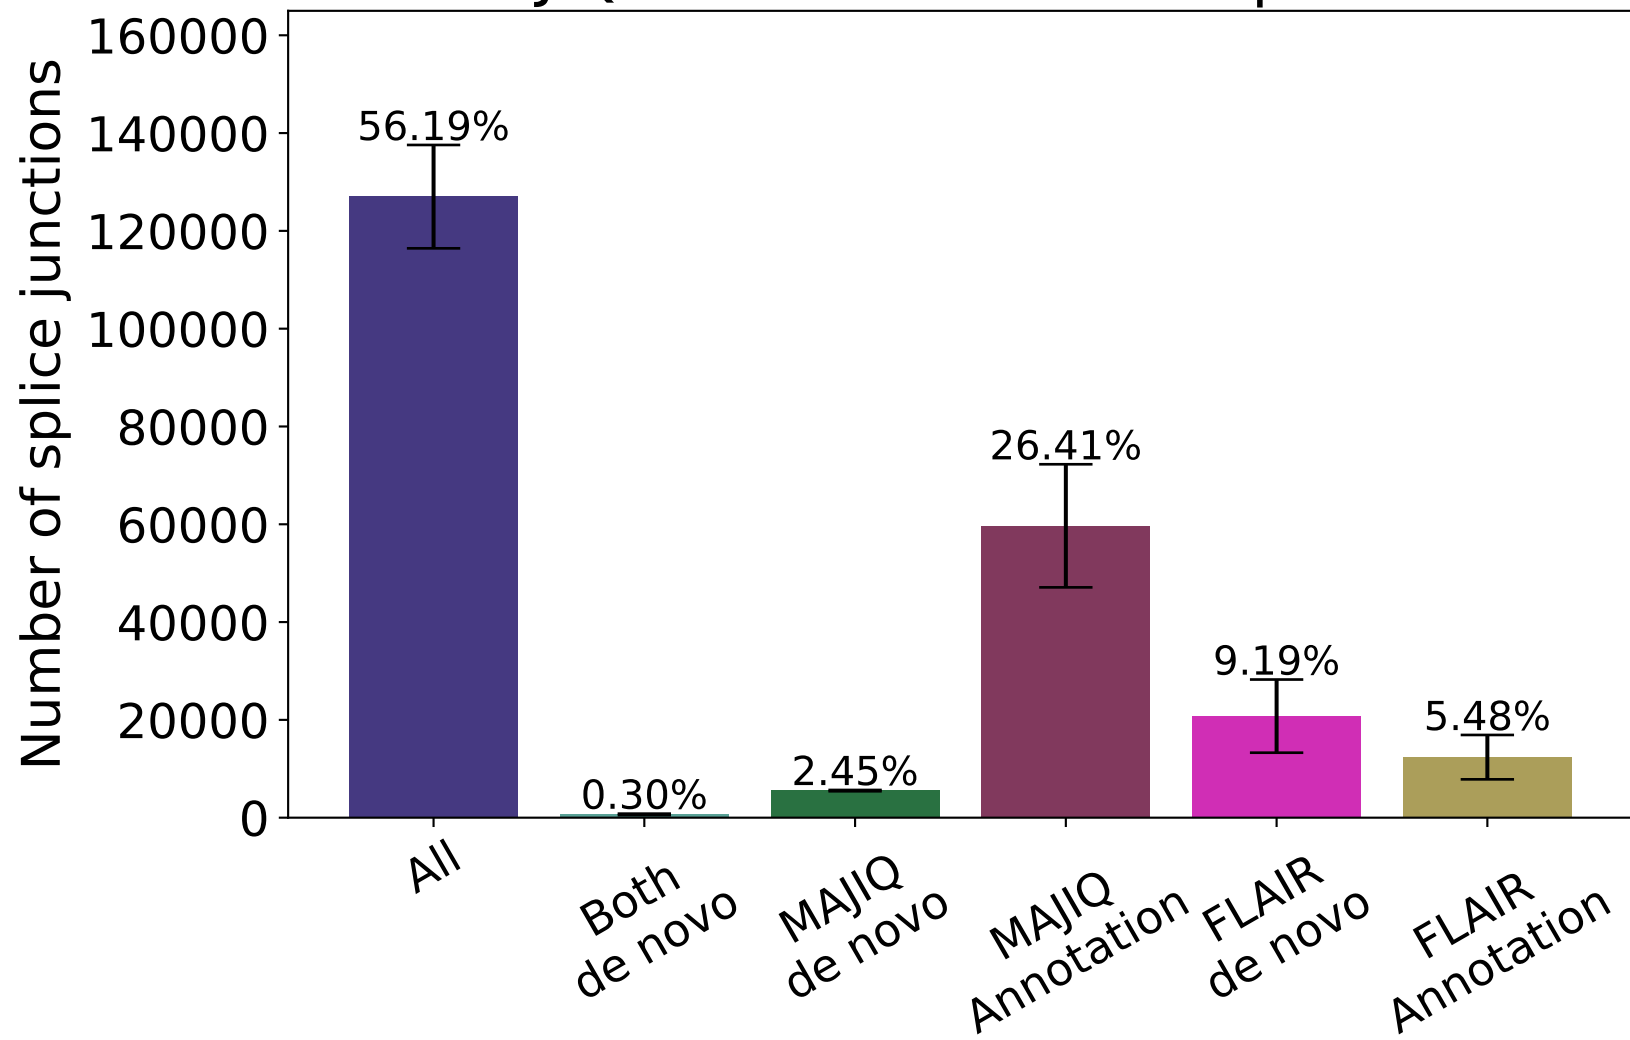

Supplement: Supplemental_code.zip [file Supplemental_Fig_S2B_flair_ont_pre.pdf › Supplemental_code/figures/Supplemental_Fig_S2/Supplemental_Fig_S2B_flair_ont_pre.pdf]

# MAJIQ and FLAIR PacBio comparison

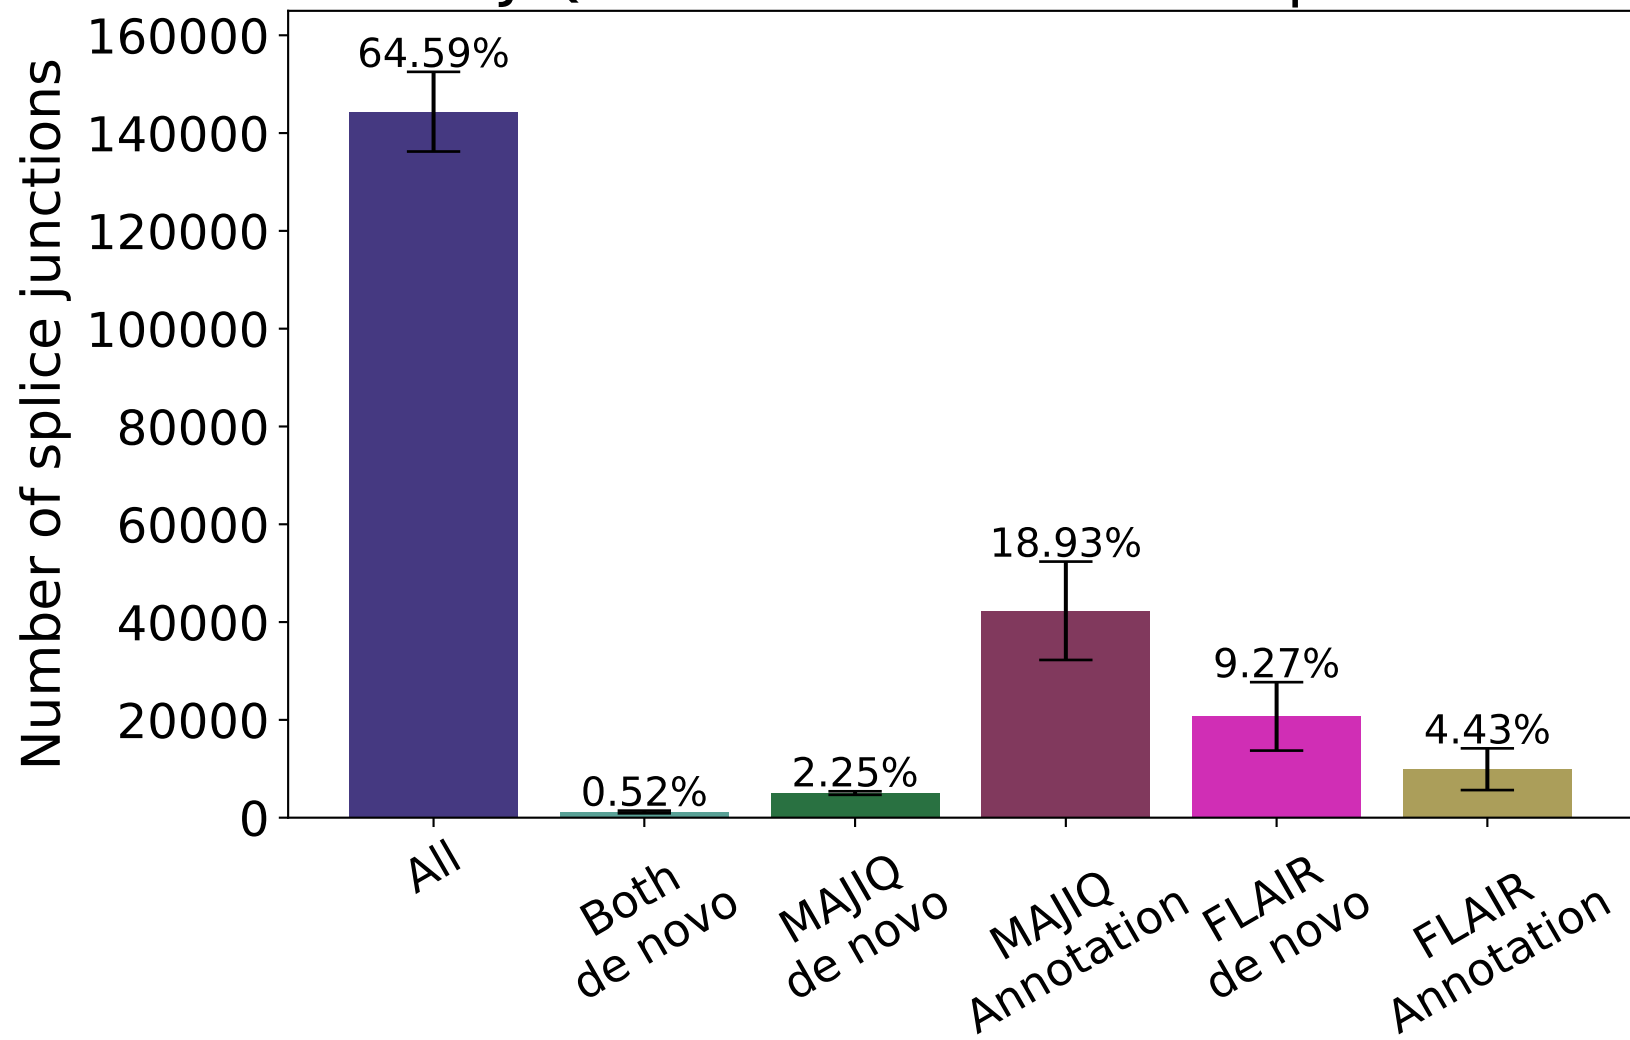

Supplement: Supplemental_code.zip [file Supplemental_Fig_S2B_flair_pcb_pre.pdf › Supplemental_code/figures/Supplemental_Fig_S2/Supplemental_Fig_S2B_flair_pcb_pre.pdf]

# MAJIQ and IsoQuant OMT comparison

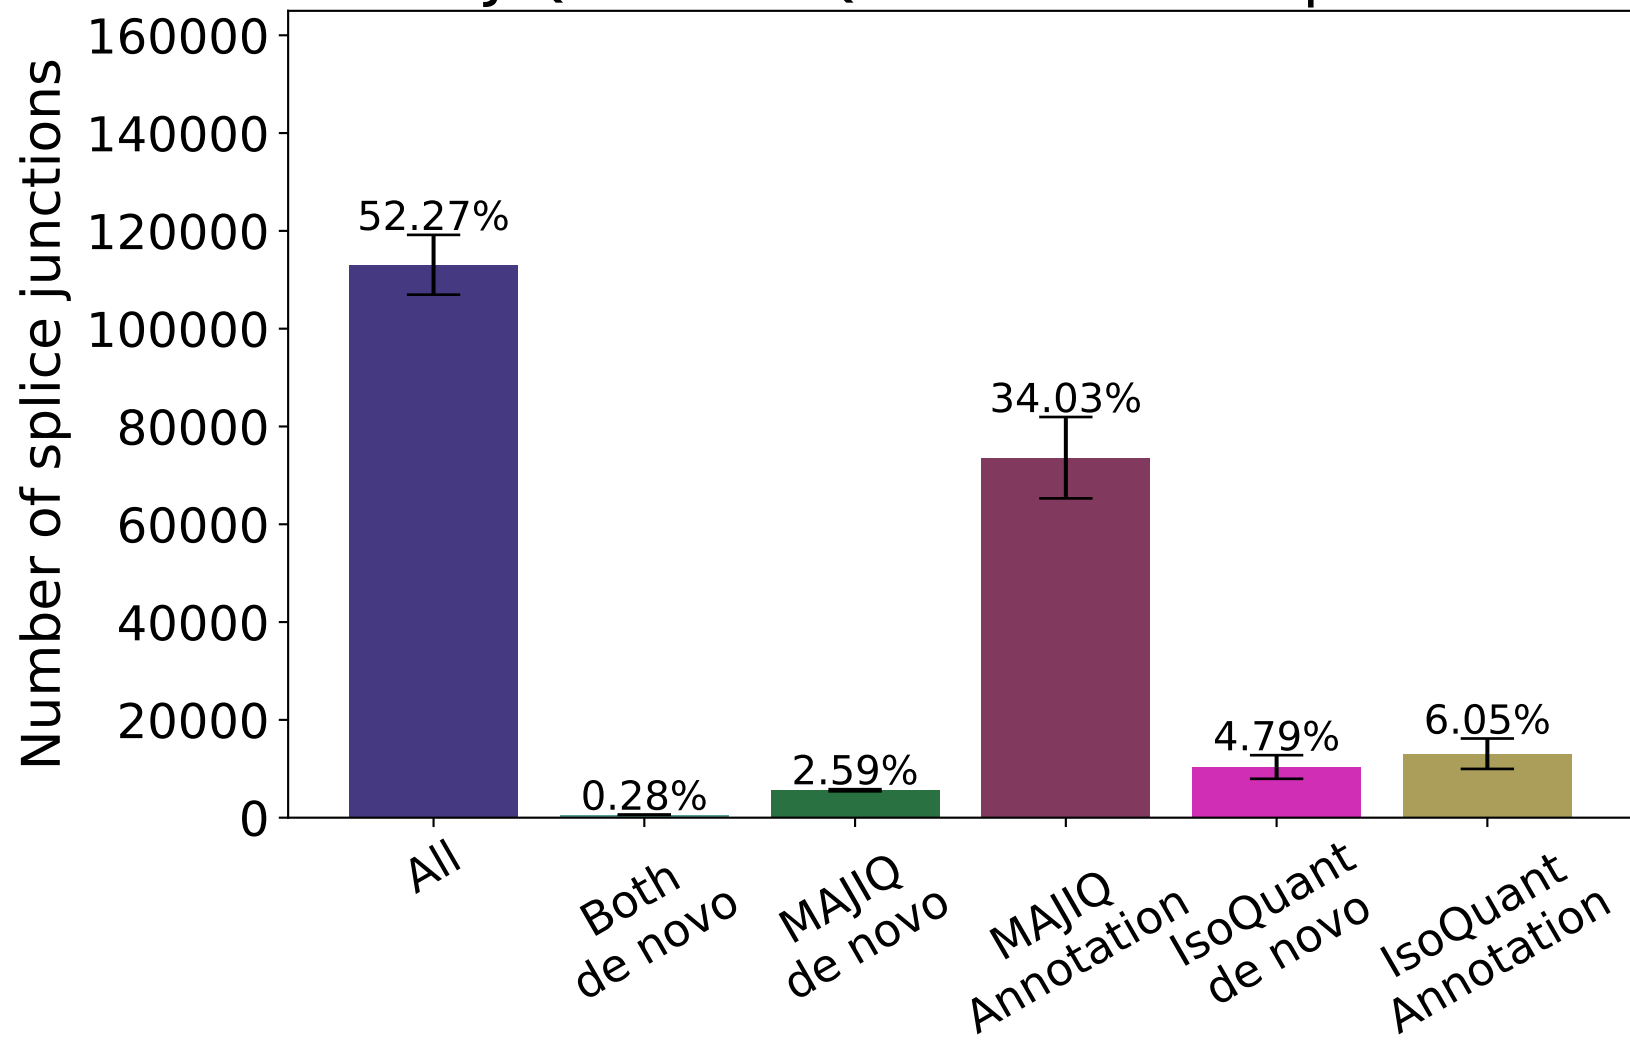

Supplement: Supplemental_code.zip [file Supplemental_Fig_S2B_isq_ont_pre.pdf › Supplemental_code/figures/Supplemental_Fig_S2/Supplemental_Fig_S2B_isq_ont_pre.pdf]

# MAJIQ and IsoQuant PacBio comparison

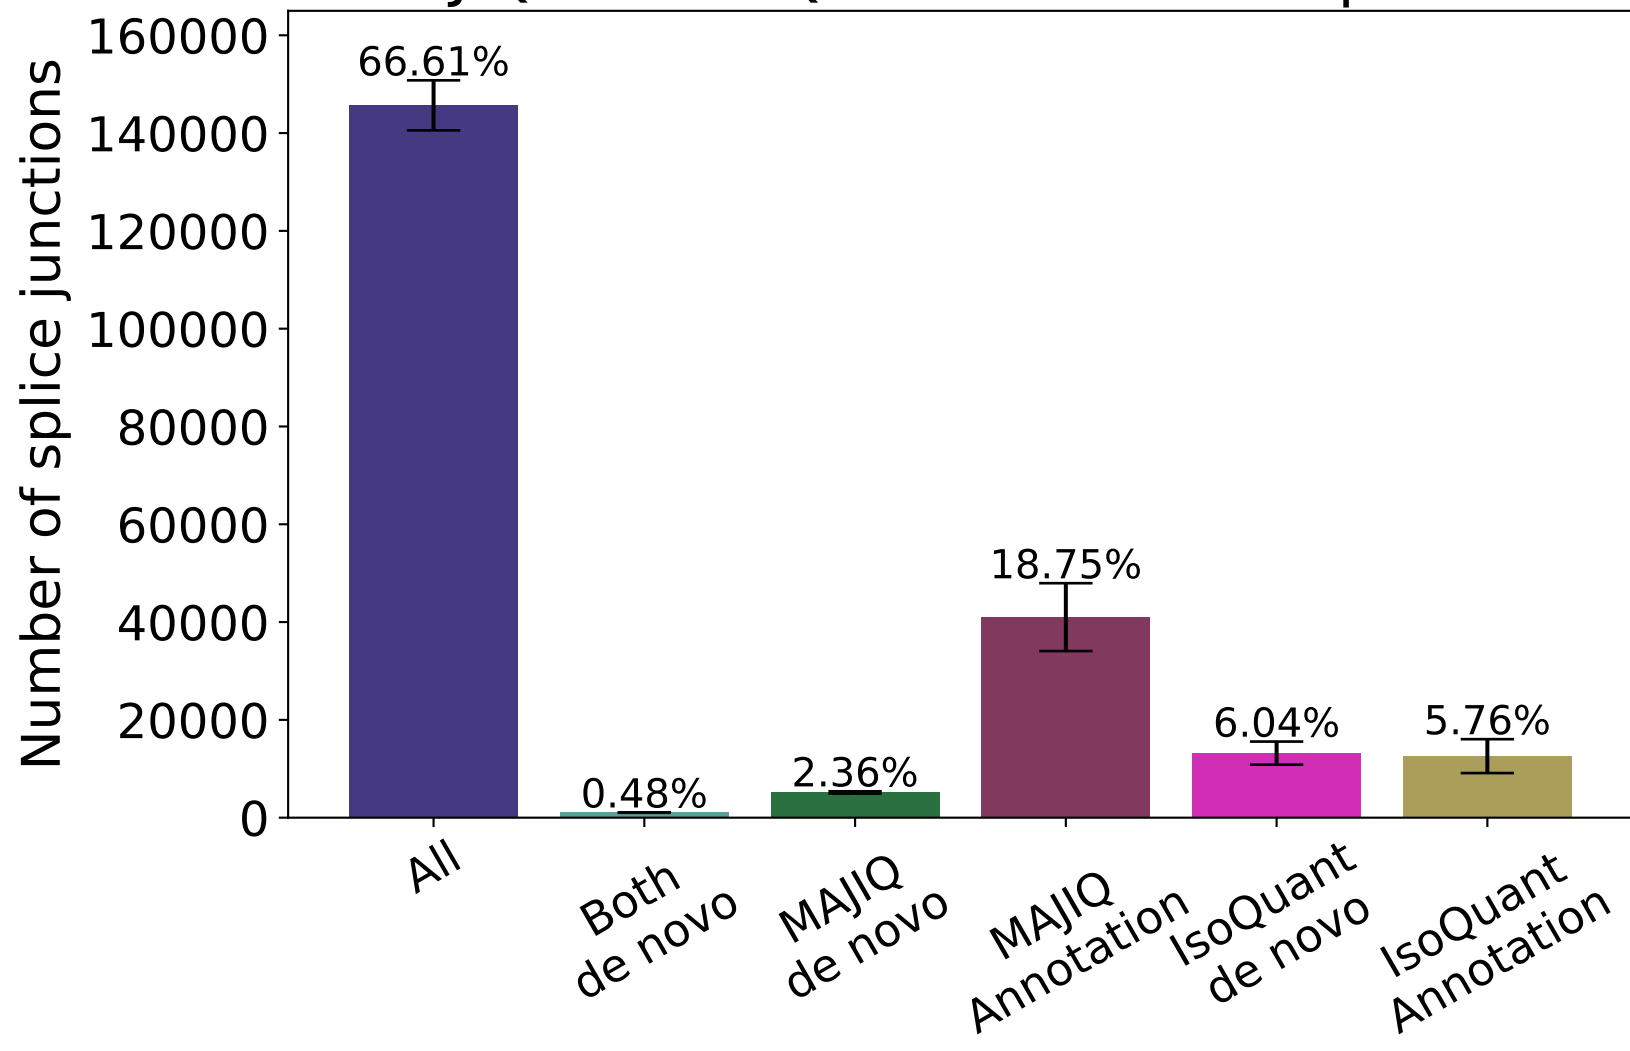

Supplement: Supplemental_code.zip [file Supplemental_Fig_S2B_isq_pcb_pre.pdf › Supplemental_code/figures/Supplemental_Fig_S2/Supplemental_Fig_S2B_isq_pcb_pre.pdf]

ALL1807: MAJIQ and Bambu ONT comparison

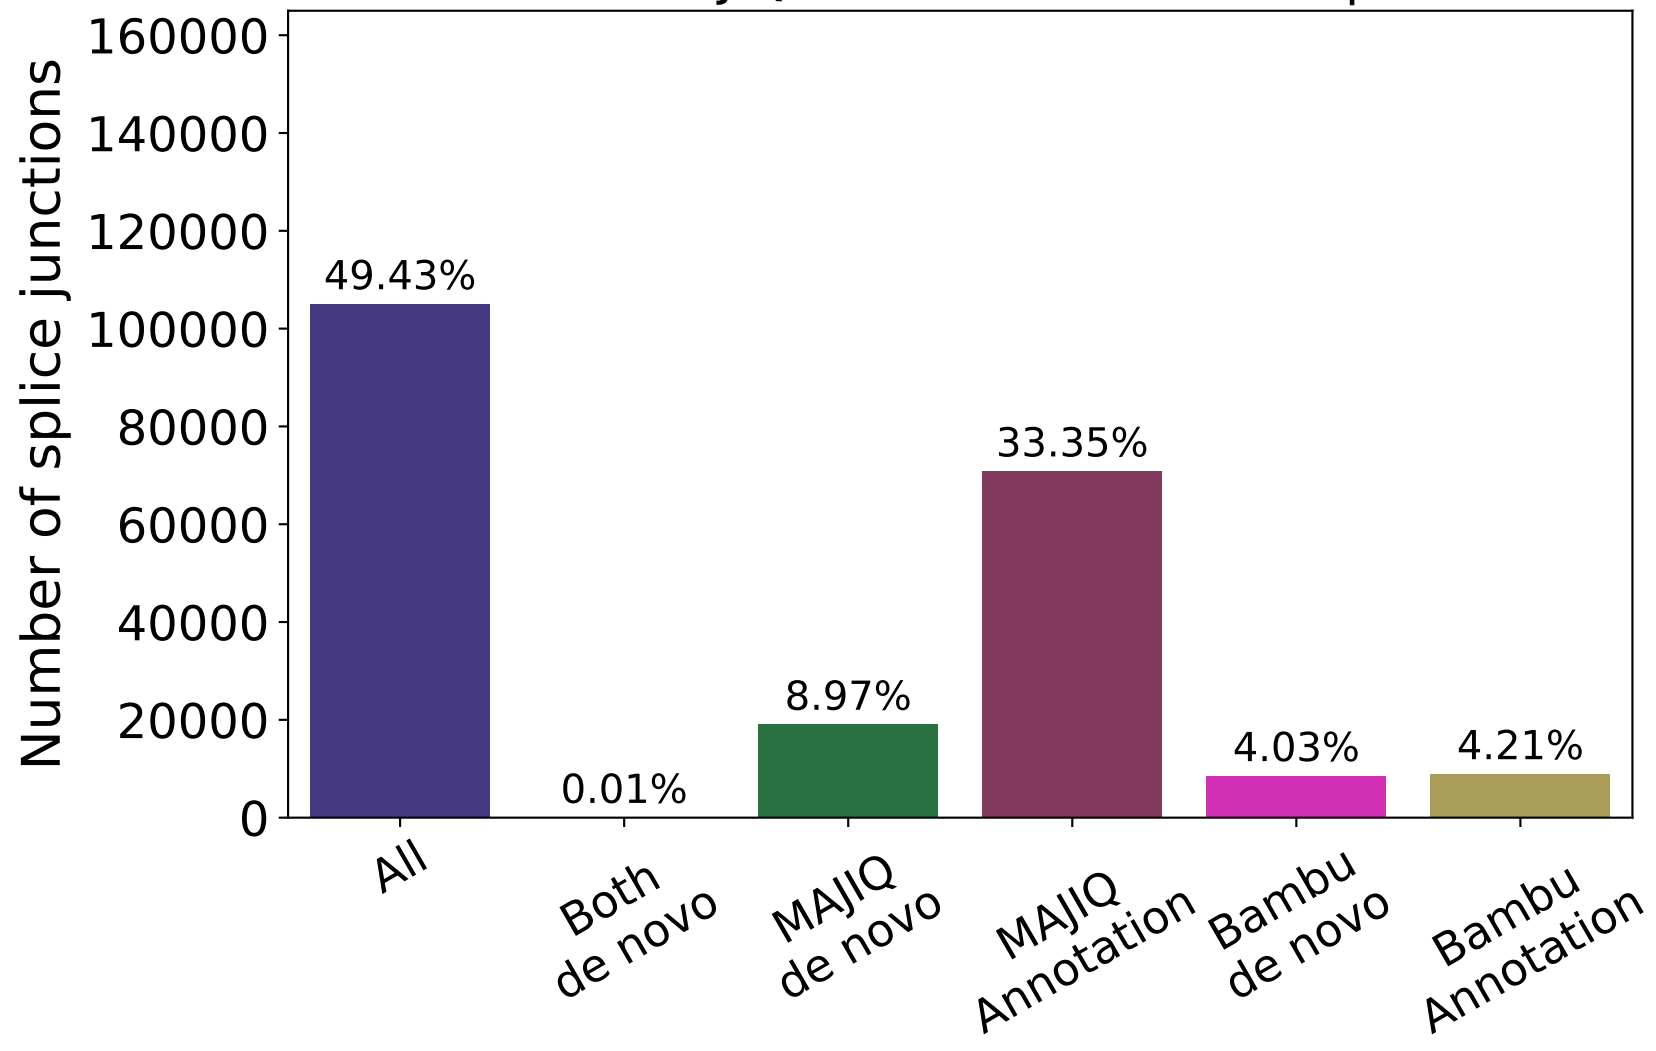

Supplement: Supplemental_code.zip [file Supplemental_Fig_S2C_ball_bambu_pre.pdf › Supplemental_code/figures/Supplemental_Fig_S2/Supplemental_Fig_S2C_ball_bambu_pre.pdf]

ALL1807: MAJIQ and ESPRESSO OMT comparison

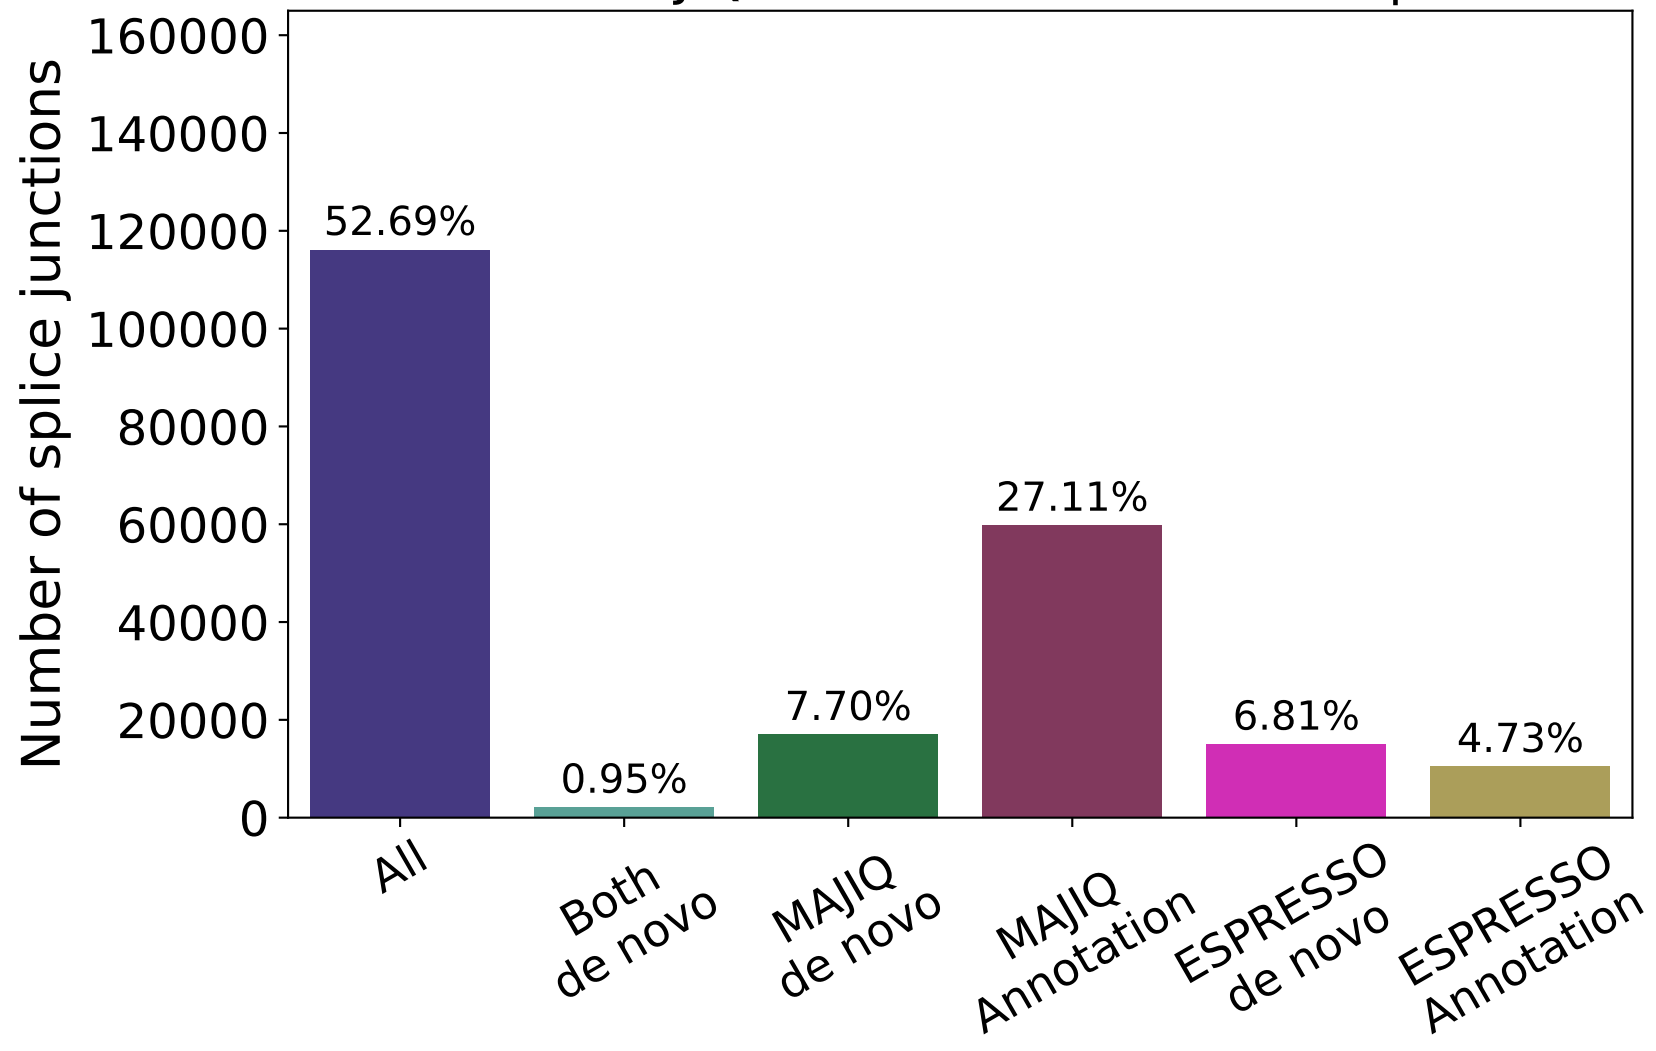

Supplement: Supplemental_code.zip [file Supplemental_Fig_S2C_ball_esp_pre.pdf › Supplemental_code/figures/Supplemental_Fig_S2/Supplemental_Fig_S2C_ball_esp_pre.pdf]

ALL1807: MAJIQ and FLAIR ONT comparison

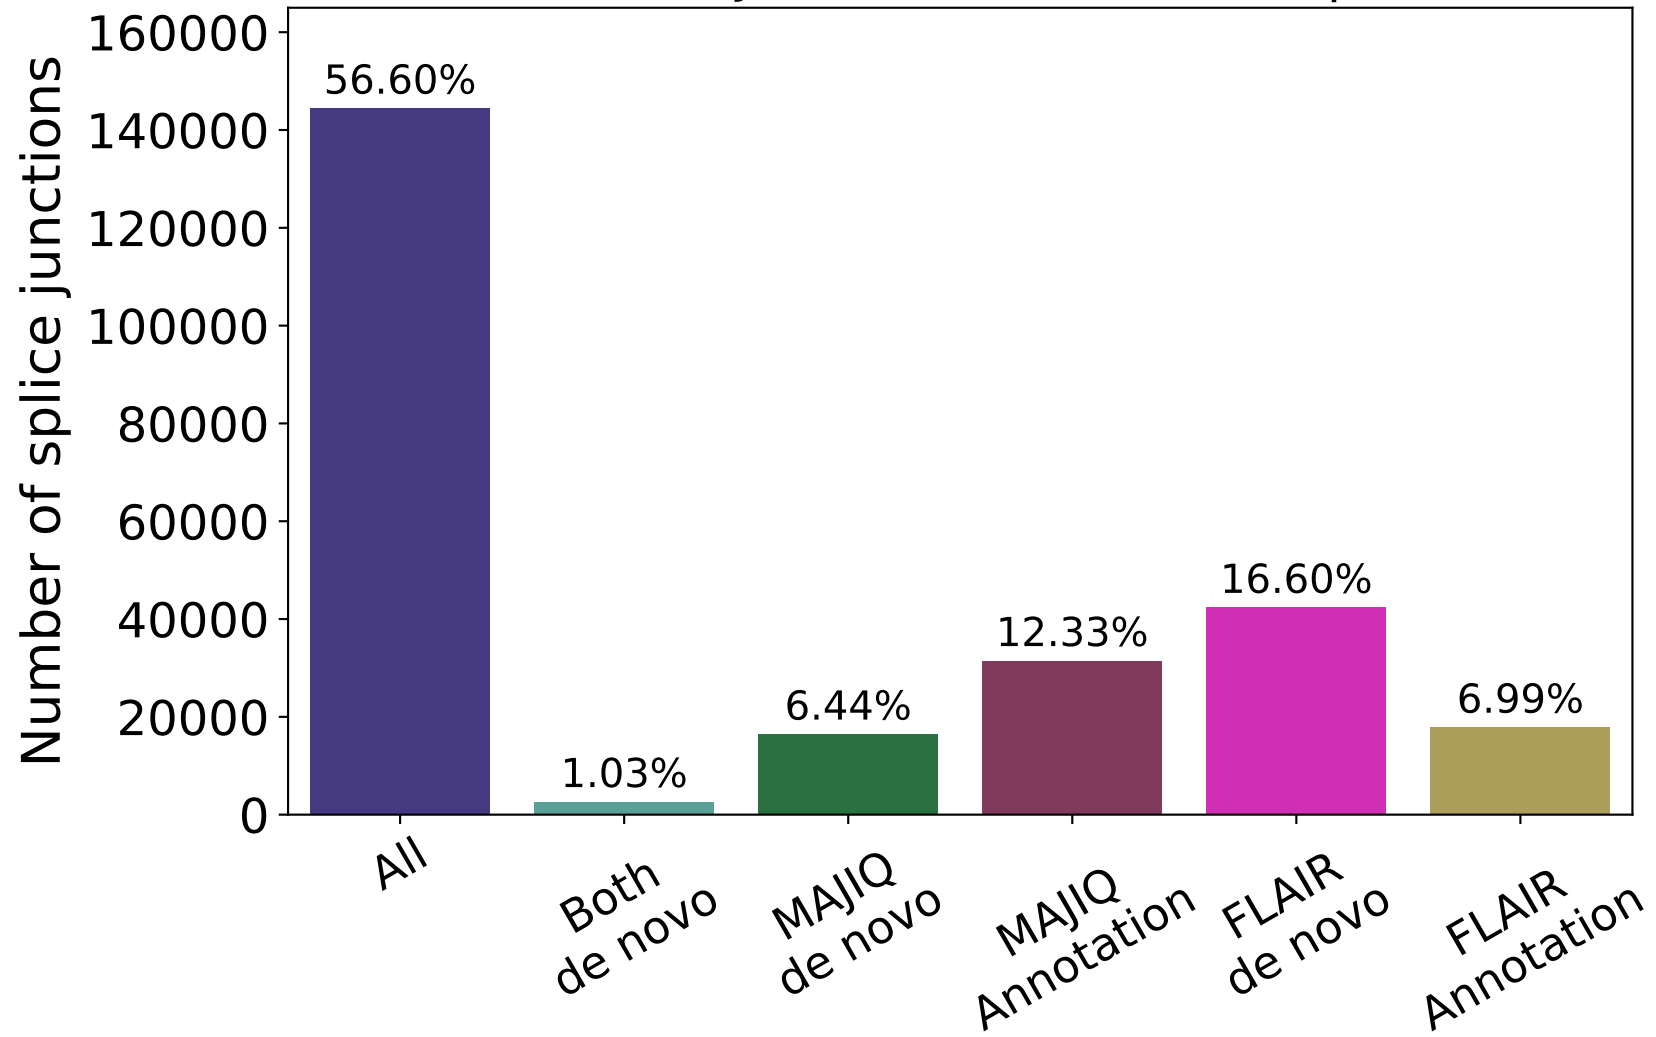

Supplement: Supplemental_code.zip [file Supplemental_Fig_S2C_ball_flair_pre.pdf › Supplemental_code/figures/Supplemental_Fig_S2/Supplemental_Fig_S2C_ball_flair_pre.pdf]

ALL1807: MAJIQ and IsoQuant ONT comparison

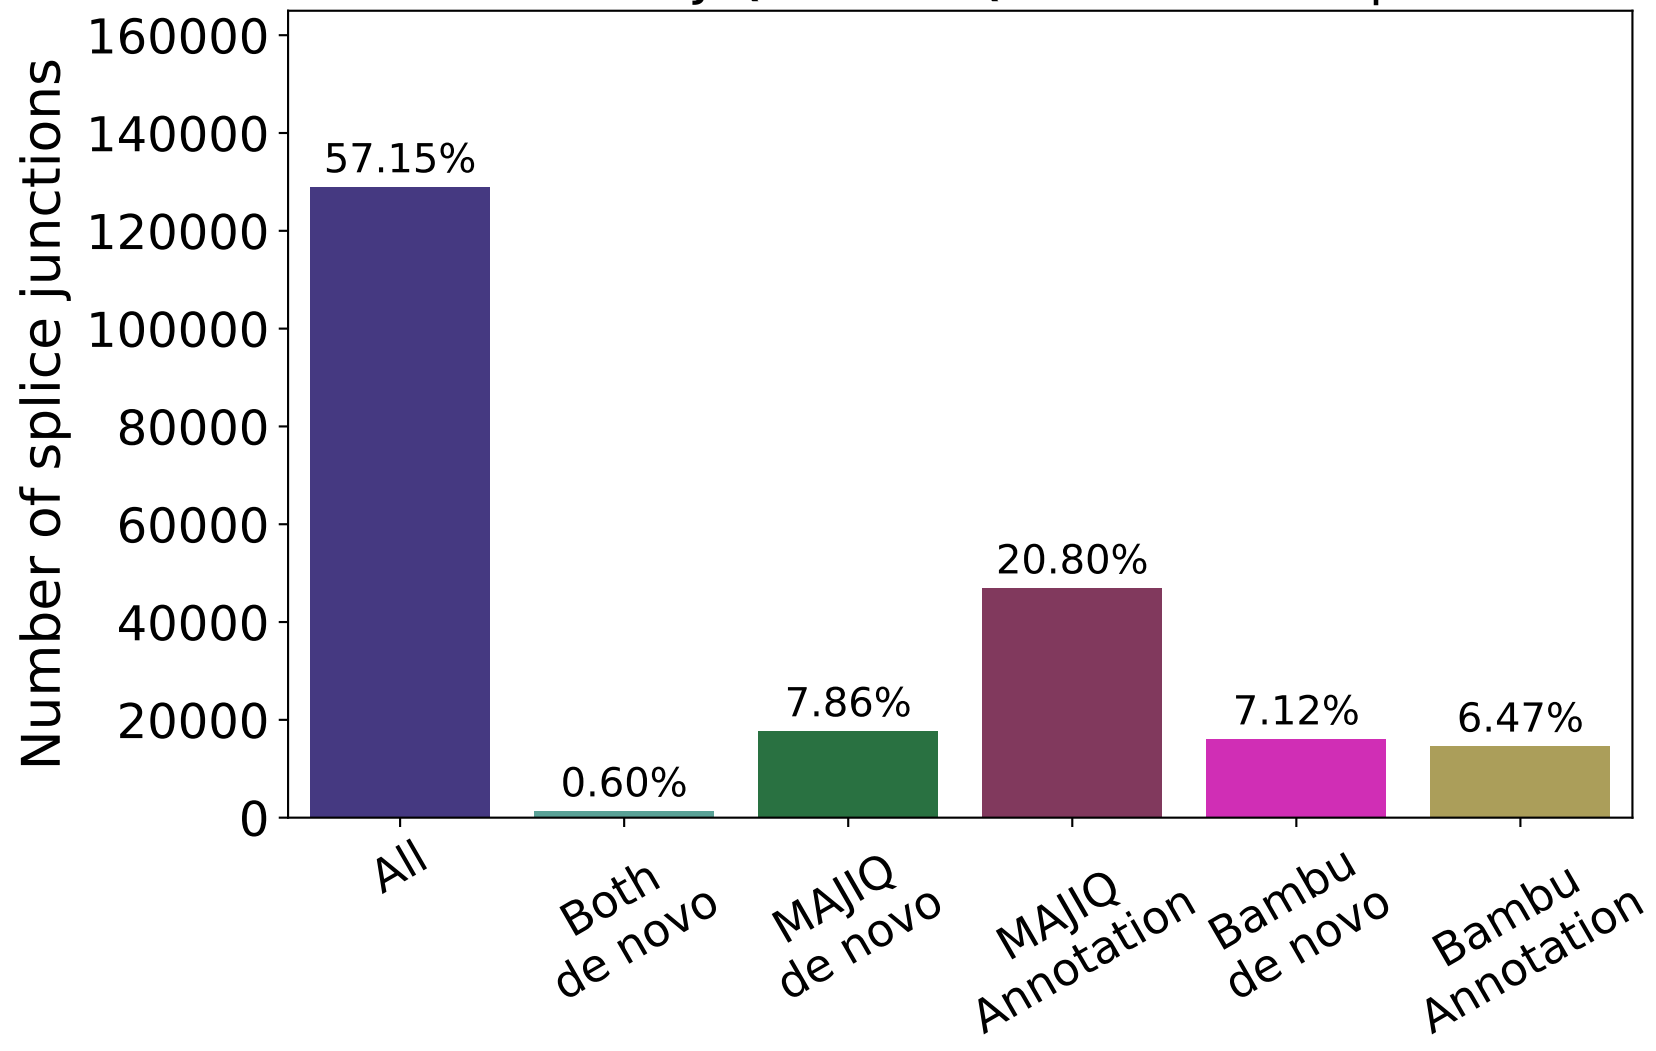

Supplement: Supplemental_code.zip [file Supplemental_Fig_S2C_ball_isq_pre.pdf › Supplemental_code/figures/Supplemental_Fig_S2/Supplemental_Fig_S2C_ball_isq_pre.pdf]

A

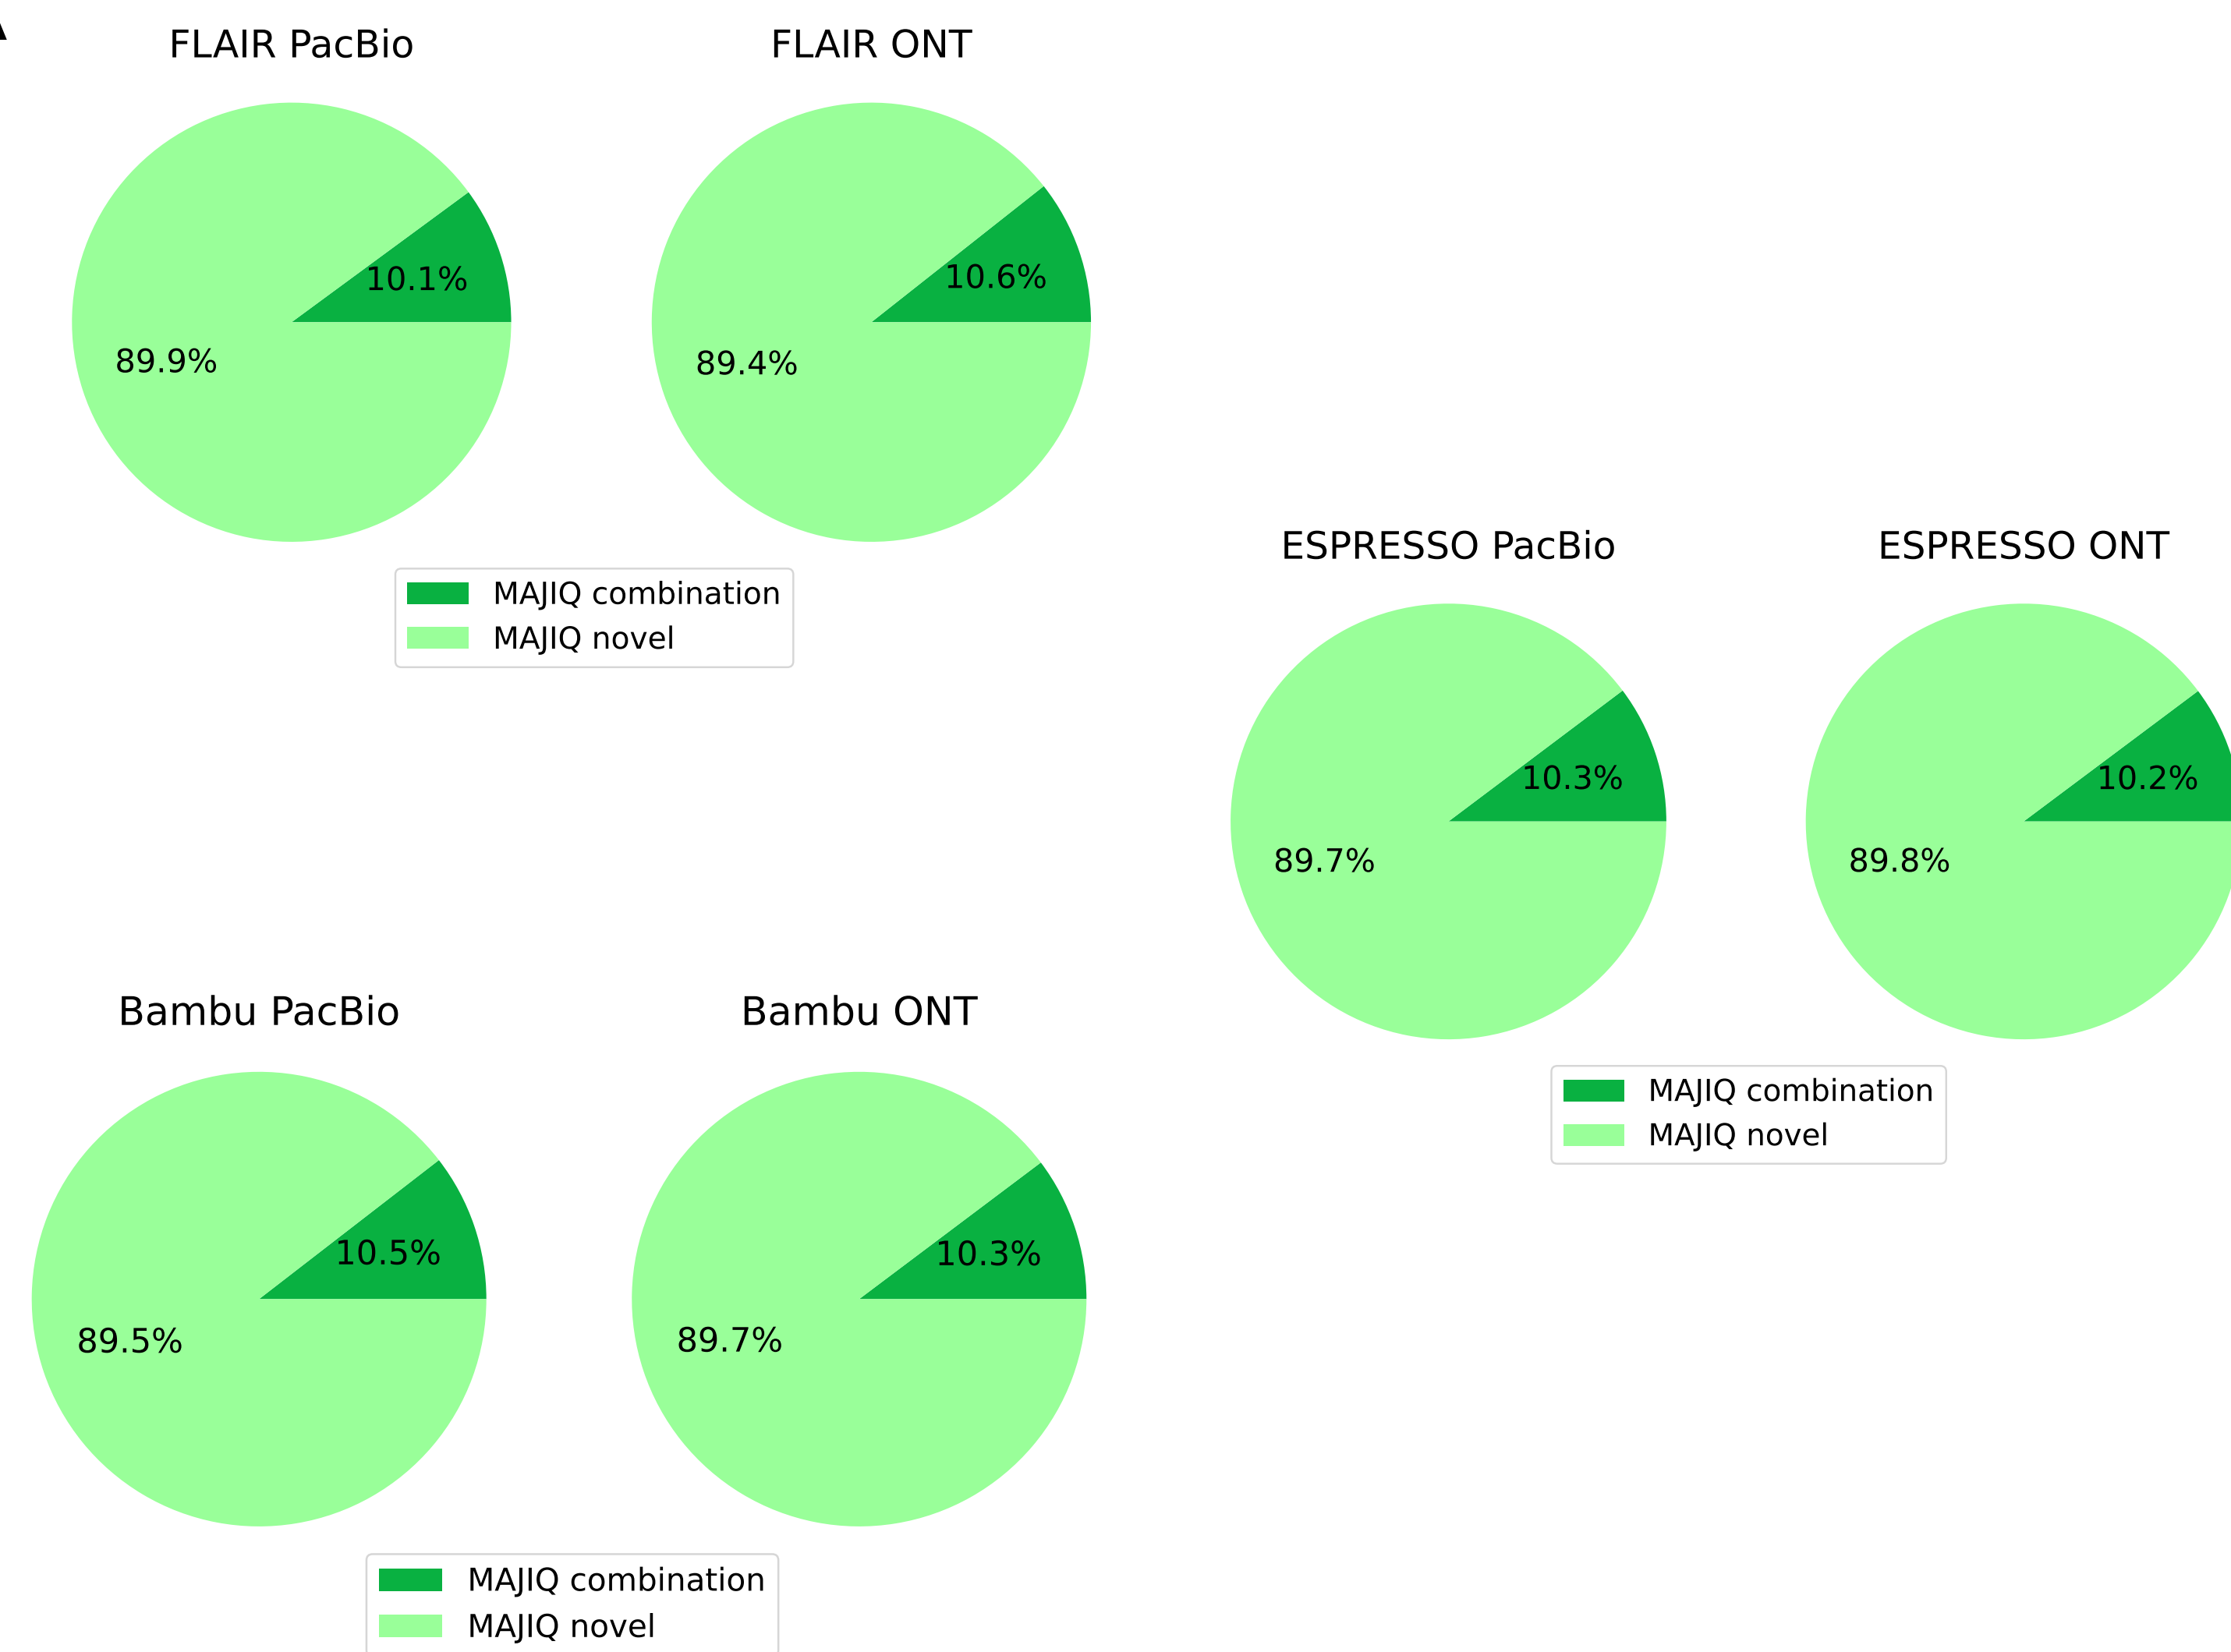

B

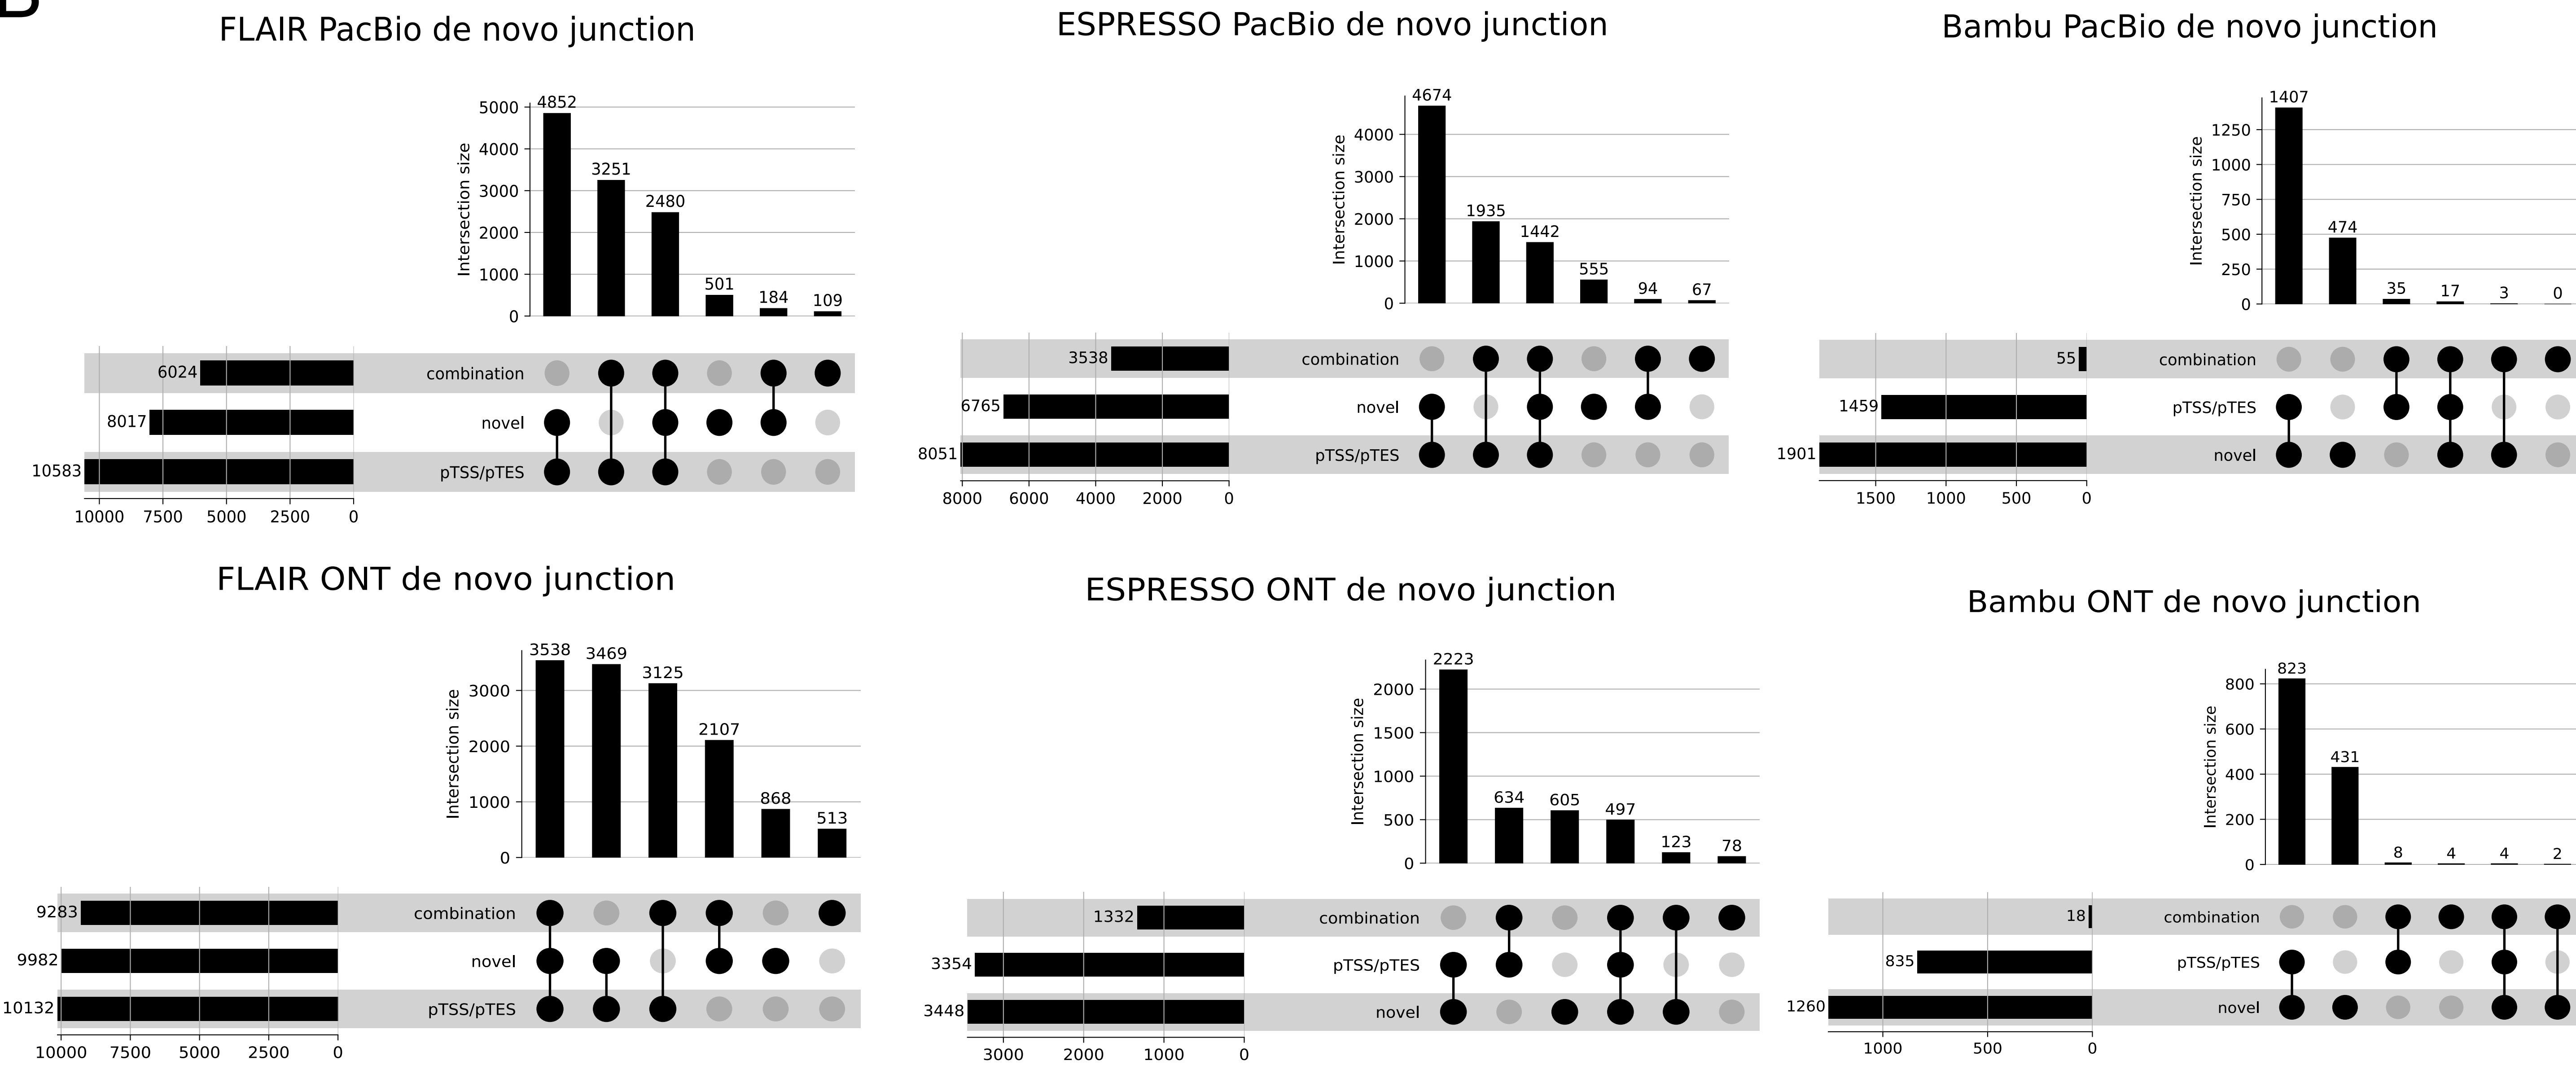

C

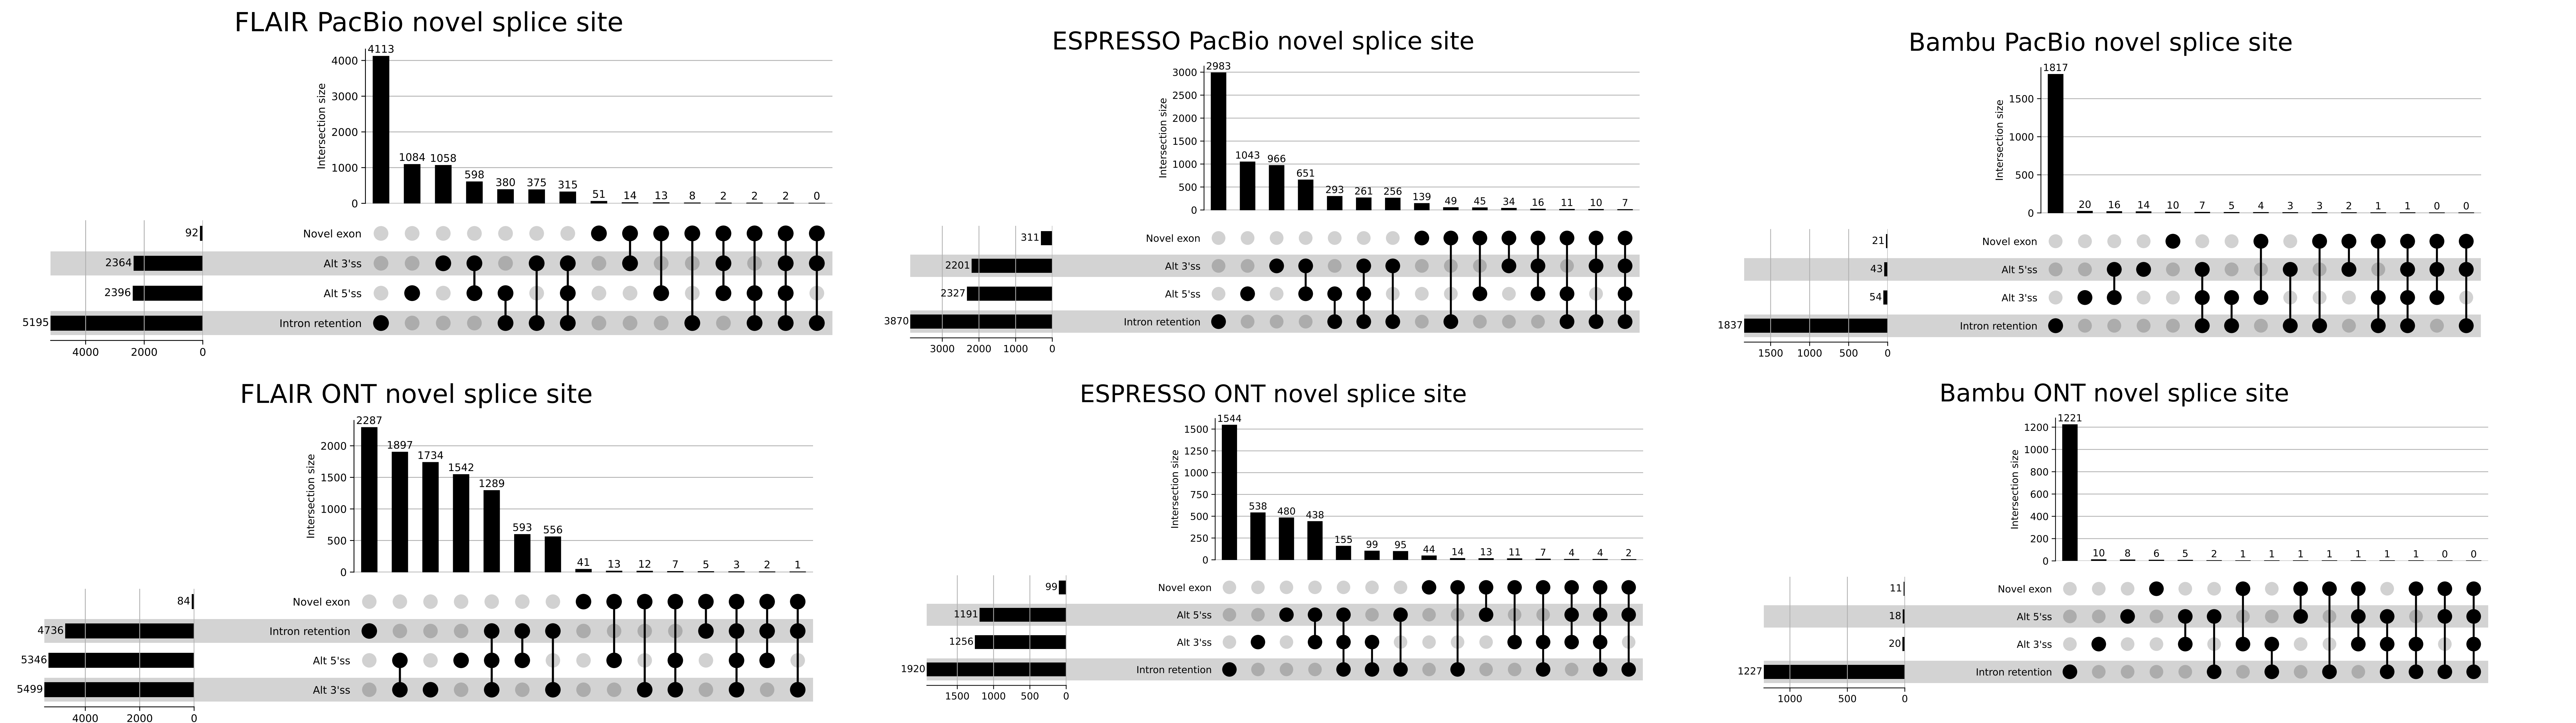

Supplement: Supplemental_code.zip [file Supplemental_Fig_S3.pdf › Supplemental_code/figures/Supplemental_Fig_S3/Supplemental_Fig_S3.pdf]

Bambu PacBio

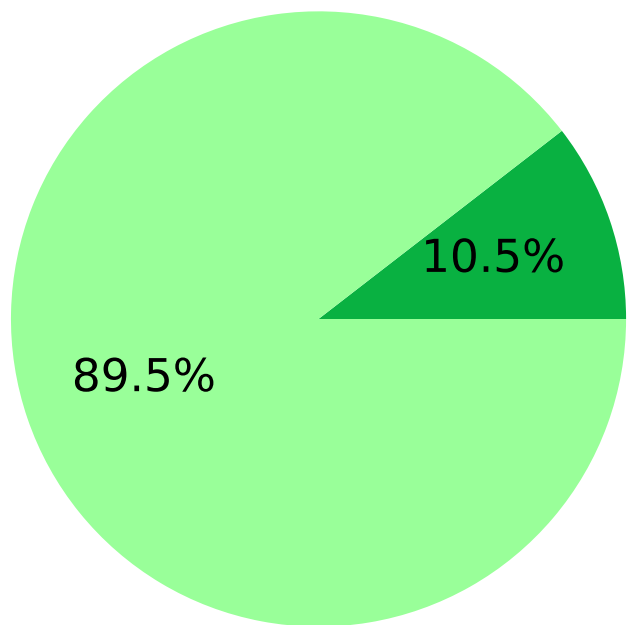

Bambu ONT

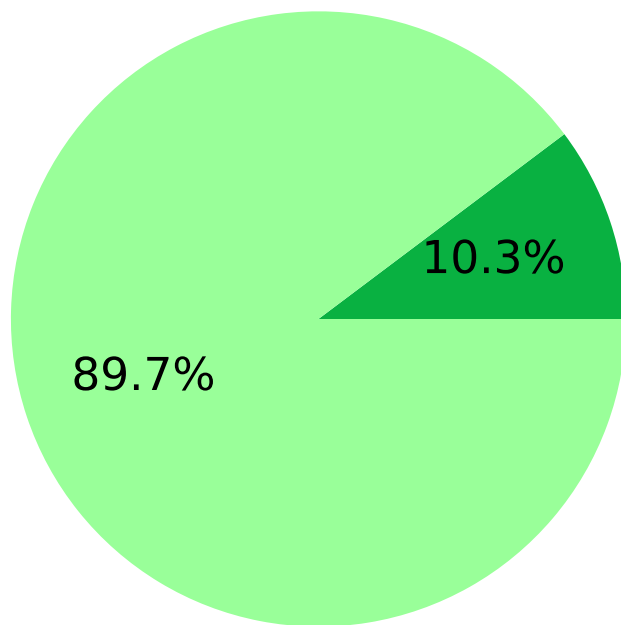

Supplement: Supplemental_code.zip [file Supplemental_Fig_S3A_pie_bambu_post.pdf › Supplemental_code/figures/Supplemental_Fig_S3/Supplemental_Fig_S3A_pie_bambu_post.pdf]

ESPRESSO PacBio

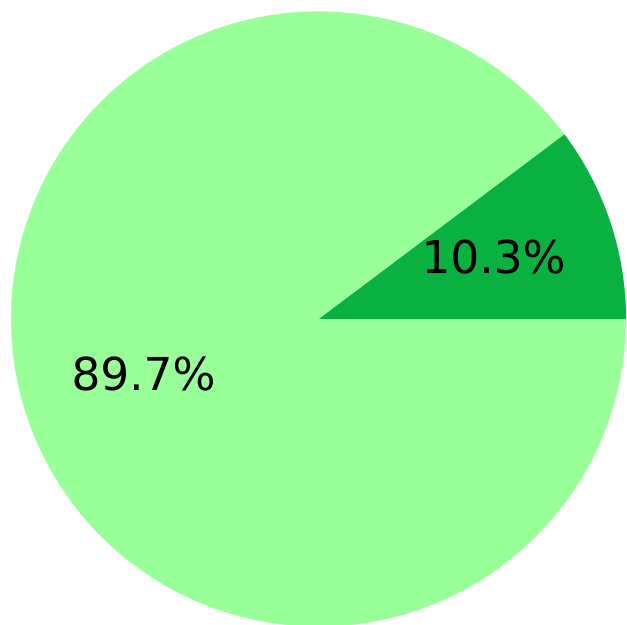

ESPRESSO ONT

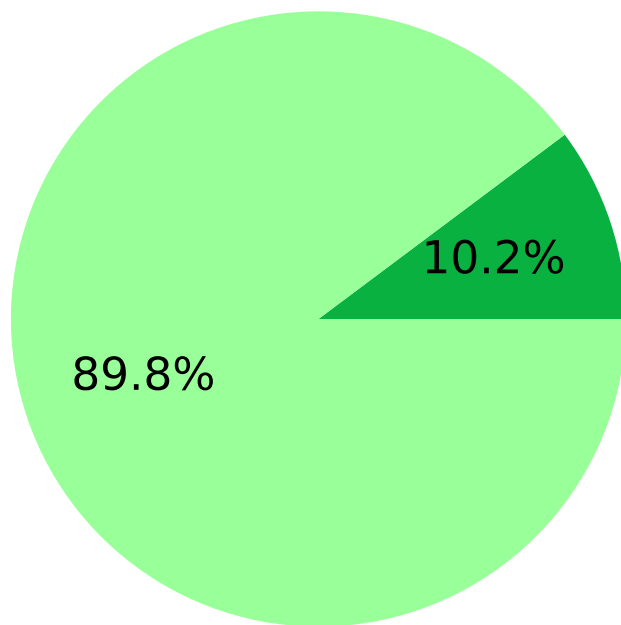

Supplement: Supplemental_code.zip [file Supplemental_Fig_S3A_pie_esp_post.pdf › Supplemental_code/figures/Supplemental_Fig_S3/Supplemental_Fig_S3A_pie_esp_post.pdf]

FLAIR PacBio

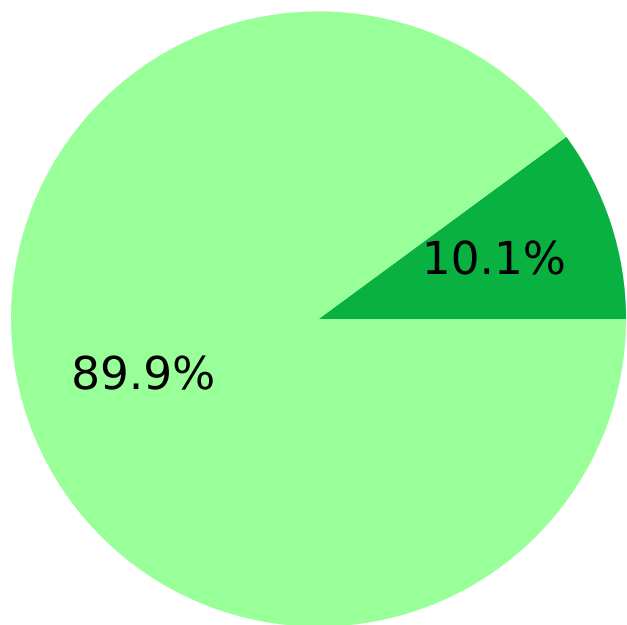

FLAIR ONT

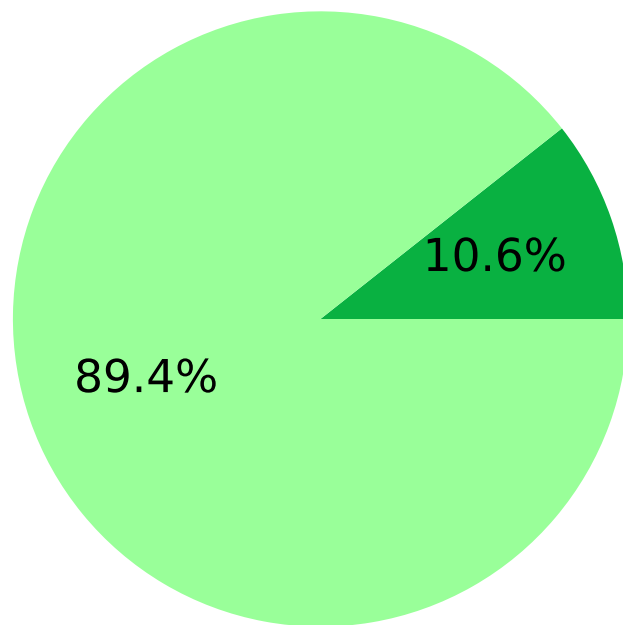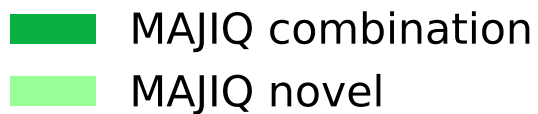

Supplement: Supplemental_code.zip [file Supplemental_Fig_S3A_pie_flair_post.pdf › Supplemental_code/figures/Supplemental_Fig_S3/Supplemental_Fig_S3A_pie_flair_post.pdf]

# Bambu ONT de novo junction

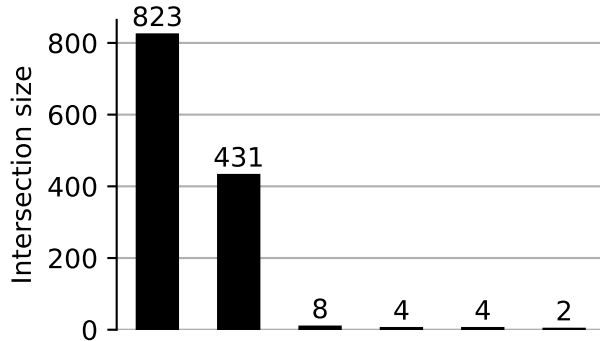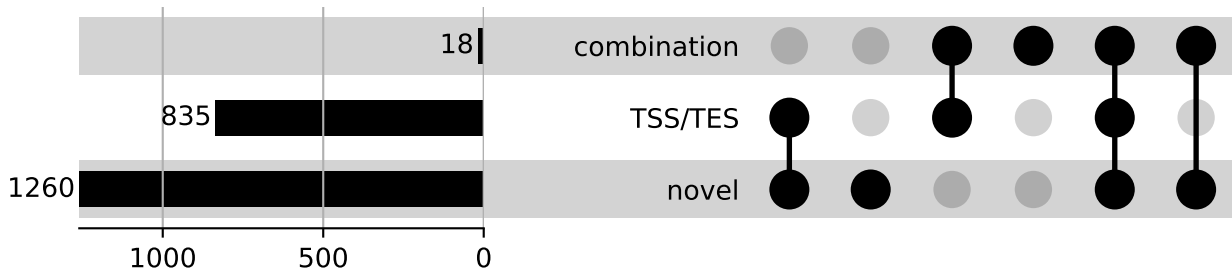

Supplement: Supplemental_code.zip [file Supplemental_Fig_S3B_upset_bambu1_ont_post.pdf › Supplemental_code/figures/Supplemental_Fig_S3/Supplemental_Fig_S3B_upset_bambu1_ont_post.pdf]

# Bambu PacBio de novo junction

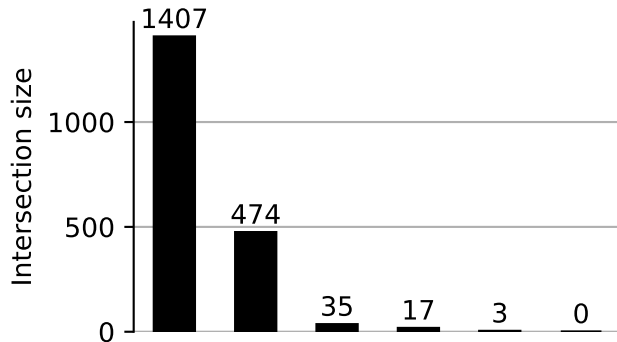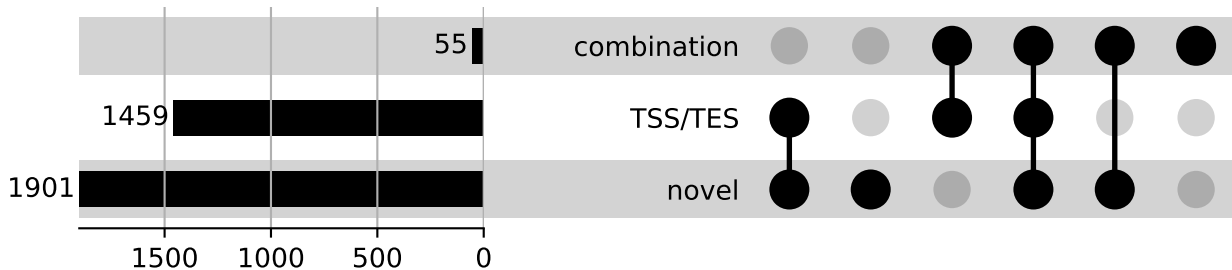

Supplement: Supplemental_code.zip [file Supplemental_Fig_S3B_upset_bambu1_pcb_post.pdf › Supplemental_code/figures/Supplemental_Fig_S3/Supplemental_Fig_S3B_upset_bambu1_pcb_post.pdf]

# ESPRESSO ONT de novo junction

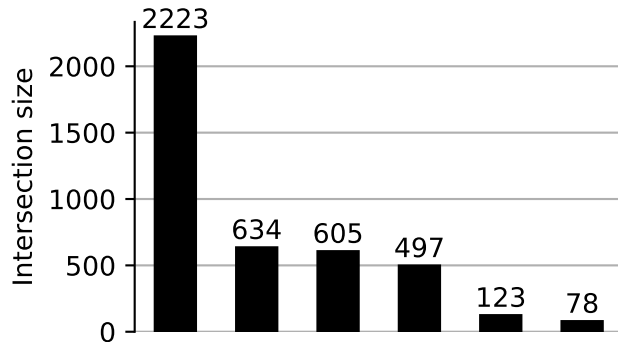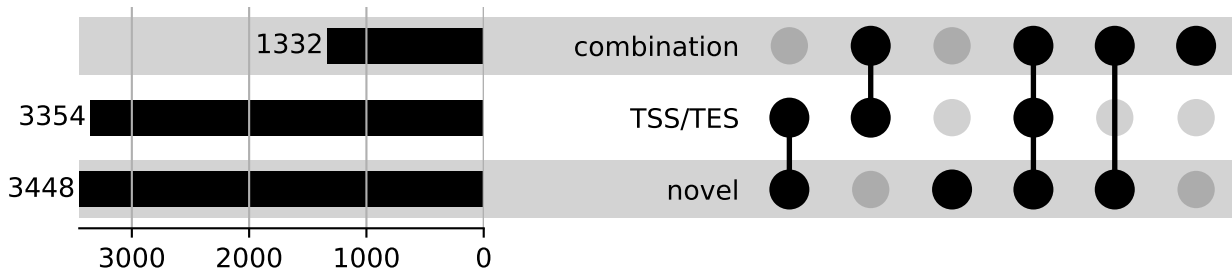

Supplement: Supplemental_code.zip [file Supplemental_Fig_S3B_upset_esp1_ont_post.pdf › Supplemental_code/figures/Supplemental_Fig_S3/Supplemental_Fig_S3B_upset_esp1_ont_post.pdf]
