# Supplementary figures and images for: Contrasting and combining transcriptome complexity captured by short and long RNA sequencing reads (part 2 of 2)
Source: HighWire-hosted journal article supplement (doi:10.1101/gr.278659.123), 2024-09-25

# ESPRESSO PacBio de novo junction

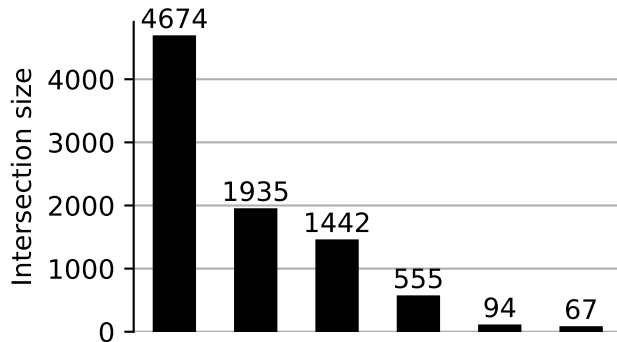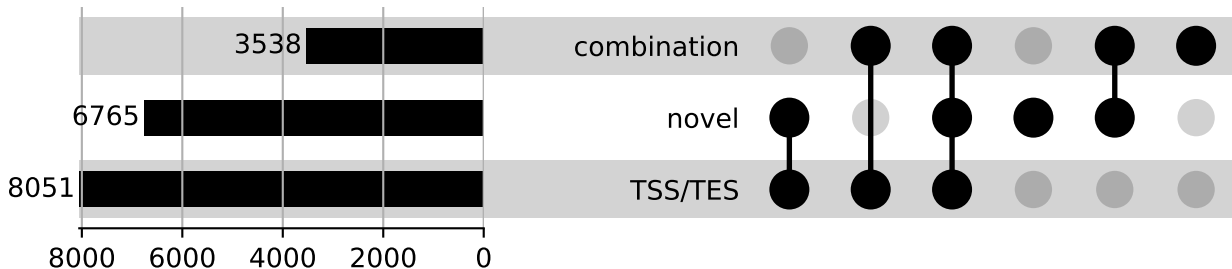

Supplement: Supplemental_code.zip [file Supplemental_Fig_S3B_upset_esp1_pcb_post.pdf › Supplemental_code/figures/Supplemental_Fig_S3/Supplemental_Fig_S3B_upset_esp1_pcb_post.pdf]

# FLAIR ONT de novo junction

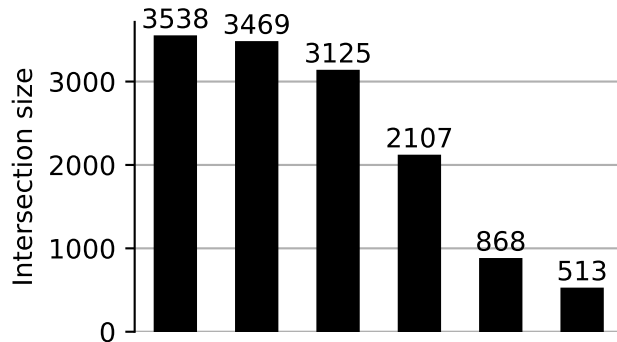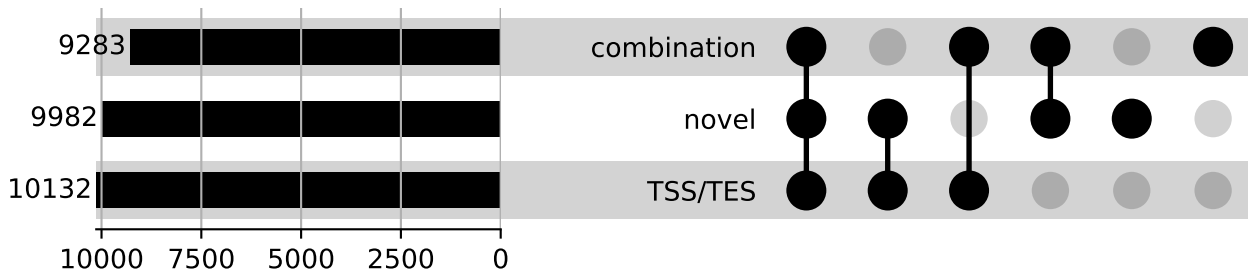

Supplement: Supplemental_code.zip [file Supplemental_Fig_S3B_upset_flair1_ont_post.pdf › Supplemental_code/figures/Supplemental_Fig_S3/Supplemental_Fig_S3B_upset_flair1_ont_post.pdf]

# FLAIR PacBio de novo junction

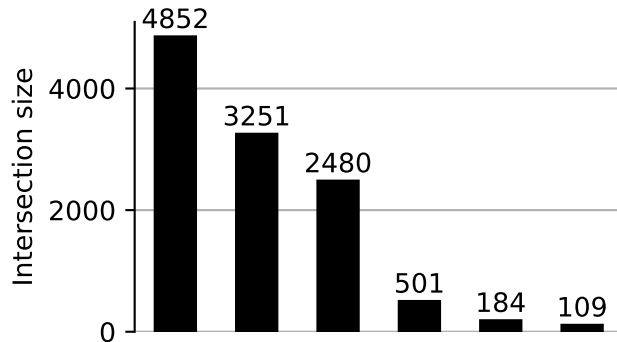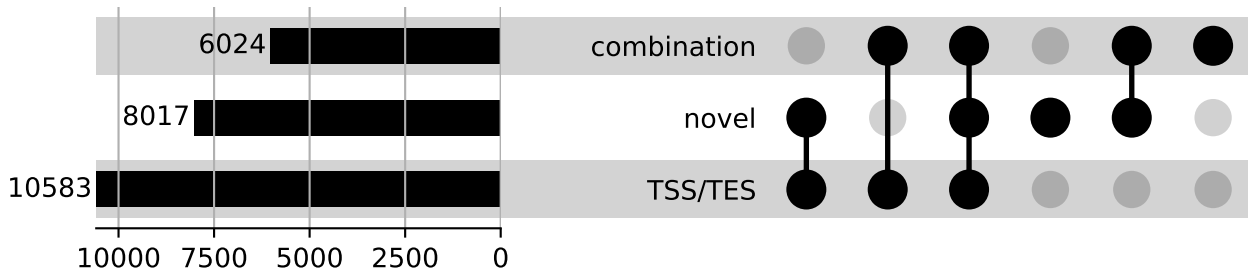

Supplement: Supplemental_code.zip [file Supplemental_Fig_S3B_upset_flair1_pcb_post.pdf › Supplemental_code/figures/Supplemental_Fig_S3/Supplemental_Fig_S3B_upset_flair1_pcb_post.pdf]

# Bambu PacBio novel splice site

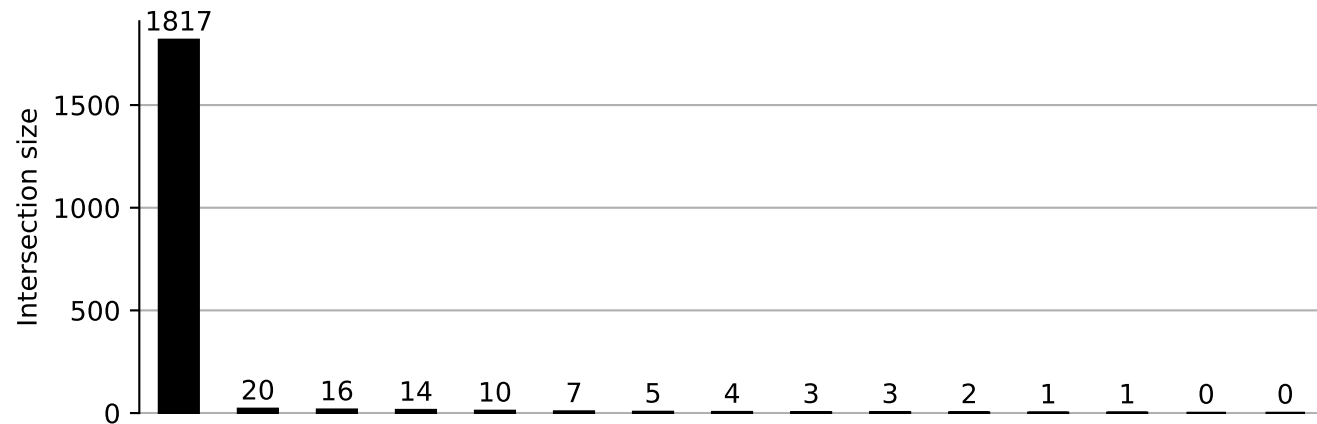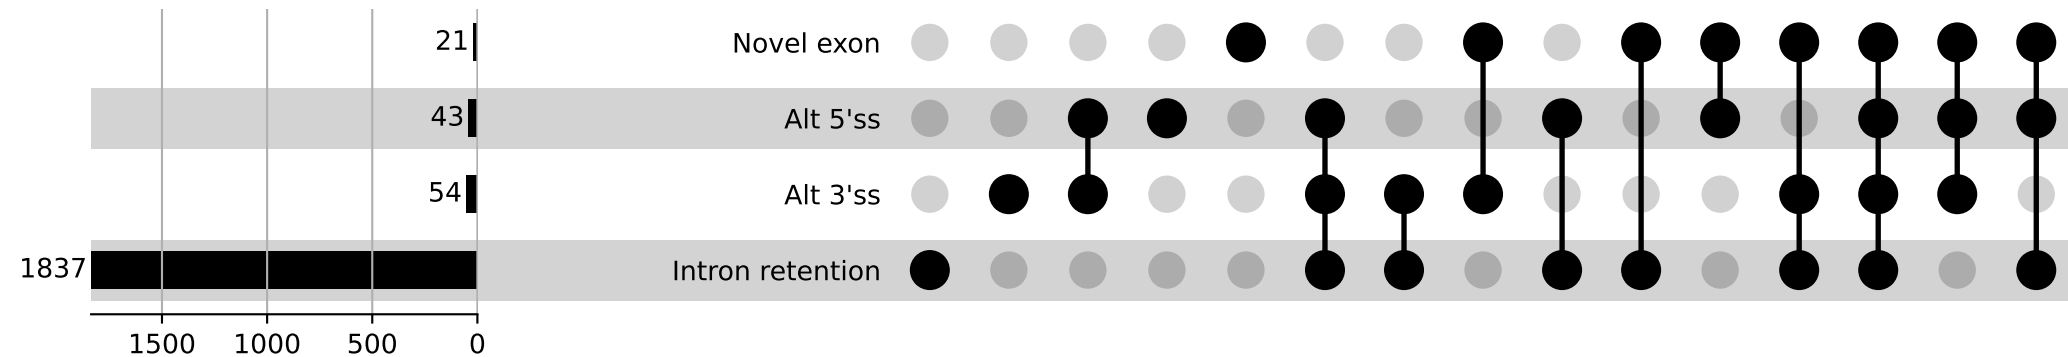

Supplement: Supplemental_code.zip [file Supplemental_Fig_S3C_upset_bambu2_pcb_post.pdf › Supplemental_code/figures/Supplemental_Fig_S3/Supplemental_Fig_S3C_upset_bambu2_pcb_post.pdf]

# ESPRESSO ONT novel splice site

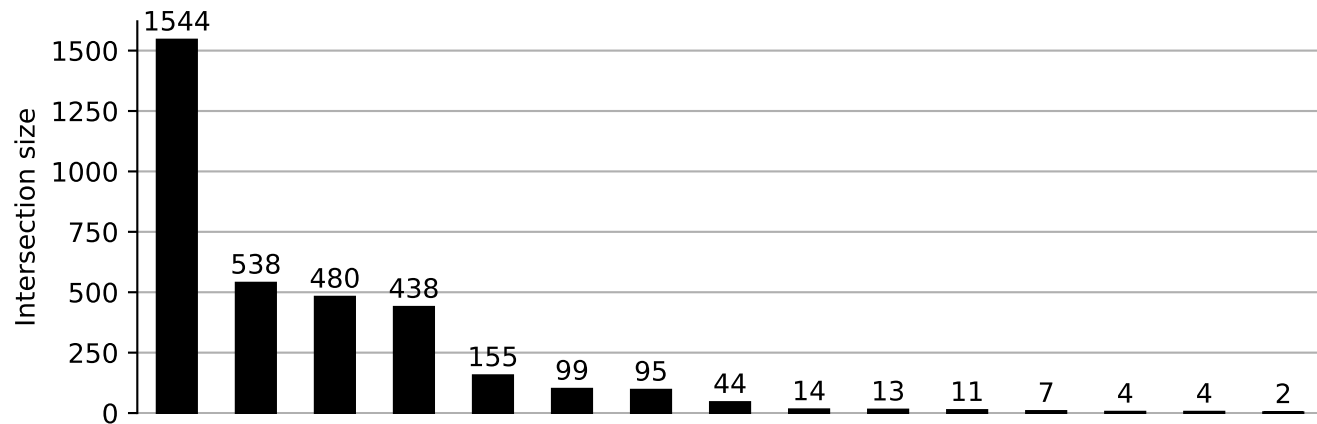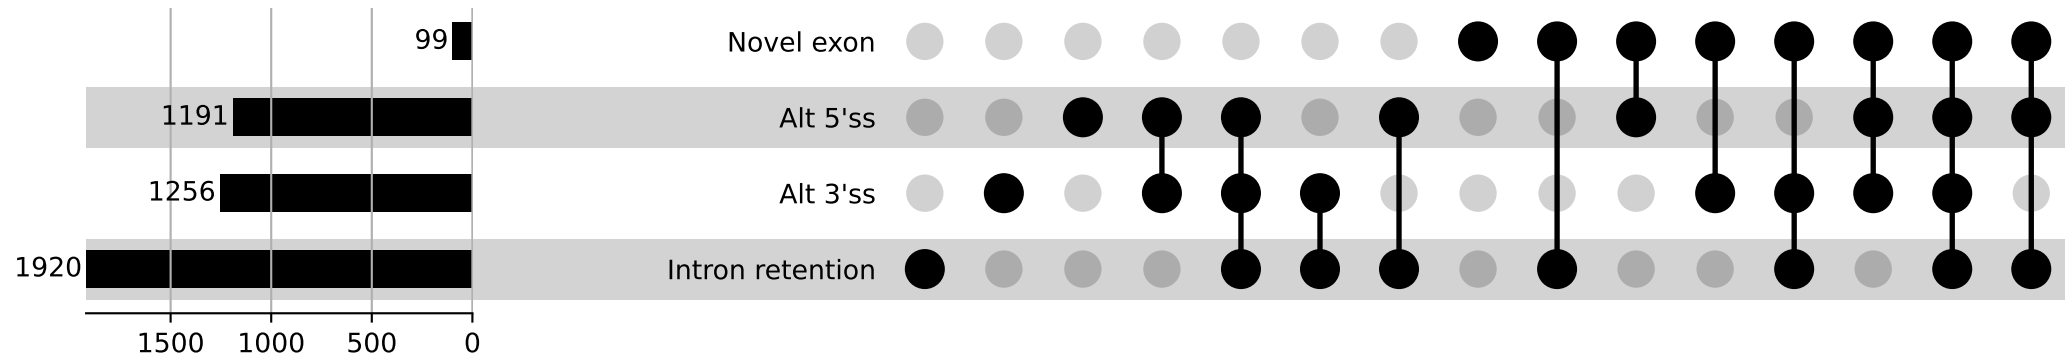

Supplement: Supplemental_code.zip [file Supplemental_Fig_S3C_upset_esp2_ont_post.pdf › Supplemental_code/figures/Supplemental_Fig_S3/Supplemental_Fig_S3C_upset_esp2_ont_post.pdf]

# ESPRESSO PacBio novel splice site

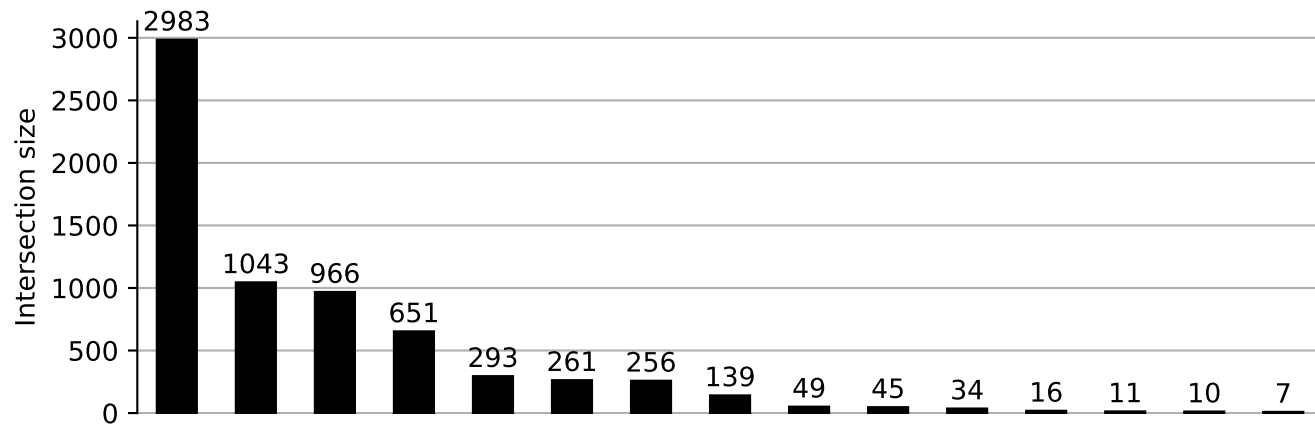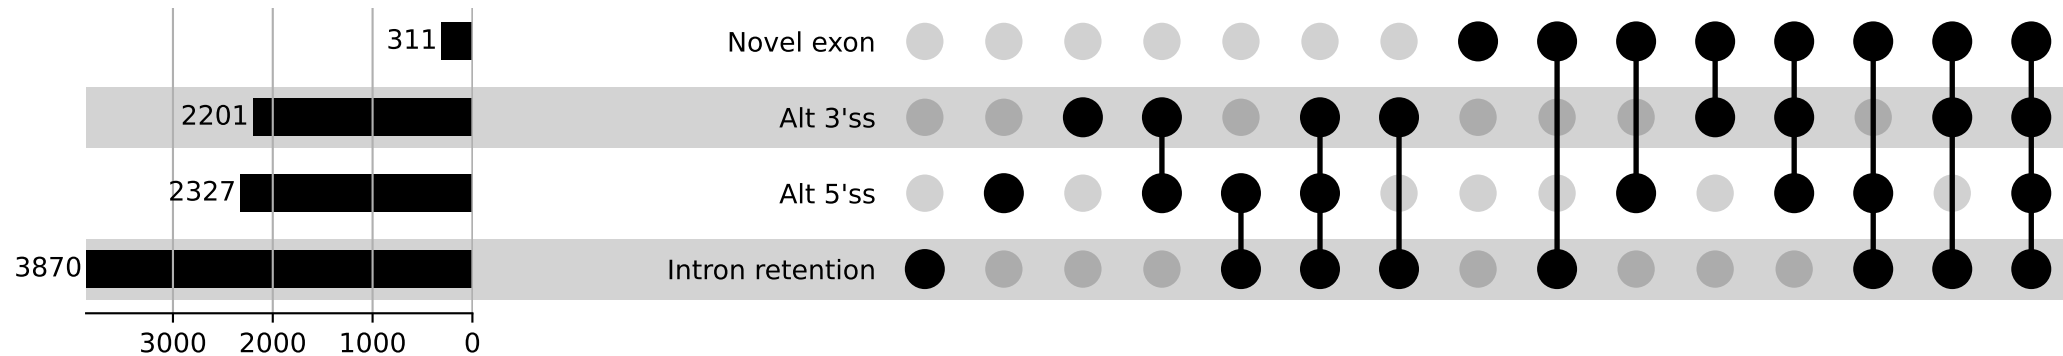

Supplement: Supplemental_code.zip [file Supplemental_Fig_S3C_upset_esp2_pcb_post.pdf › Supplemental_code/figures/Supplemental_Fig_S3/Supplemental_Fig_S3C_upset_esp2_pcb_post.pdf]

# FLAIR ONT novel splice site

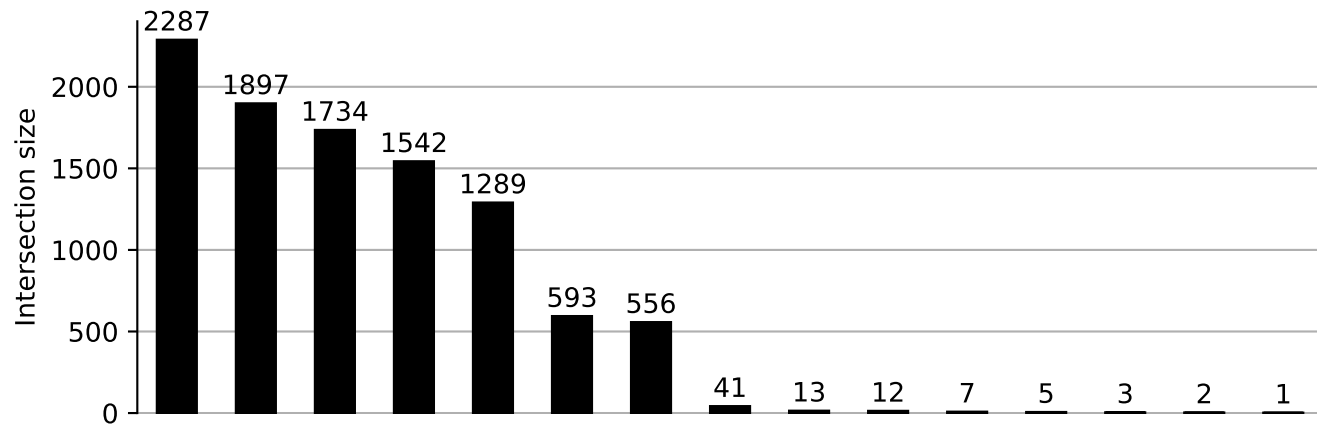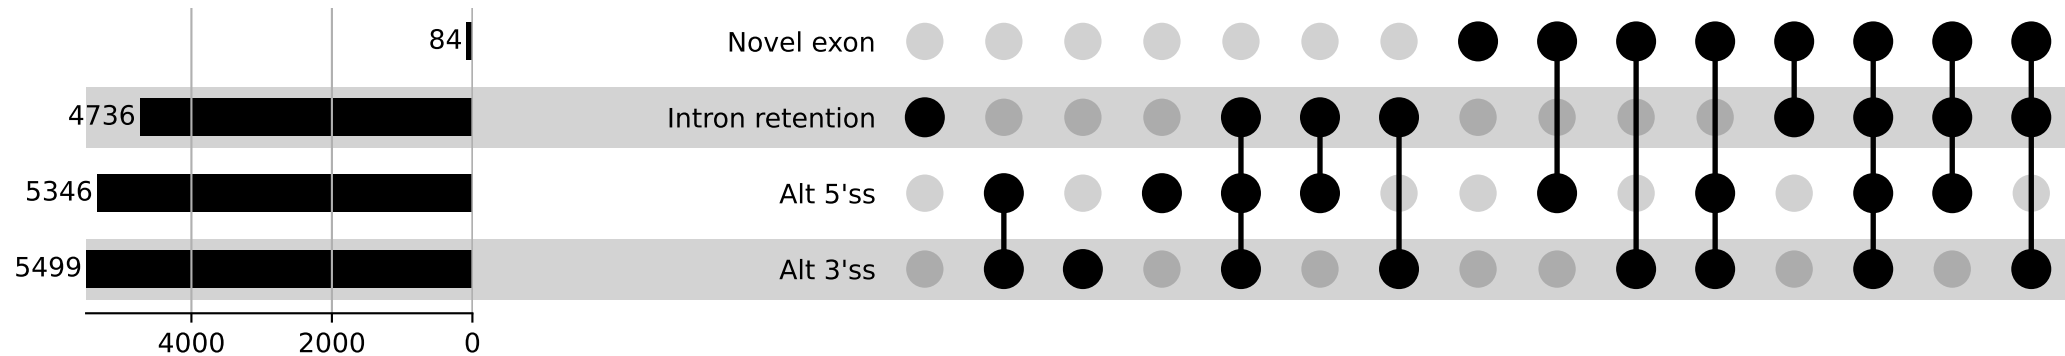

Supplement: Supplemental_code.zip [file Supplemental_Fig_S3C_upset_flair2_ont_post.pdf › Supplemental_code/figures/Supplemental_Fig_S3/Supplemental_Fig_S3C_upset_flair2_ont_post.pdf]

Bambu PacBio

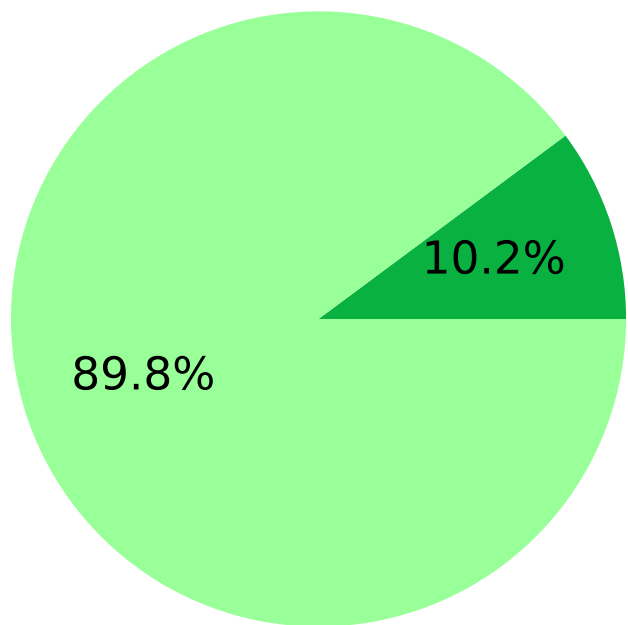

Bambu ONT

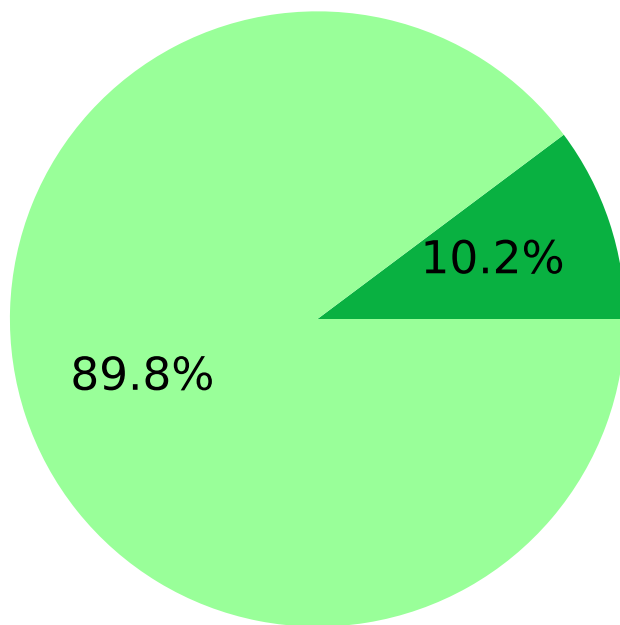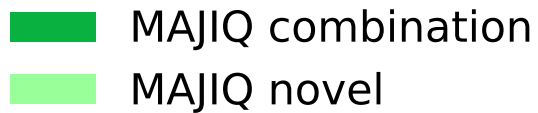

Supplement: Supplemental_code.zip [file Supplemental_Fig_S4A_pie_bambu_pre.pdf › Supplemental_code/figures/Supplemental_Fig_S4/Supplemental_Fig_S4A_pie_bambu_pre.pdf]

ESPRESSO PacBio

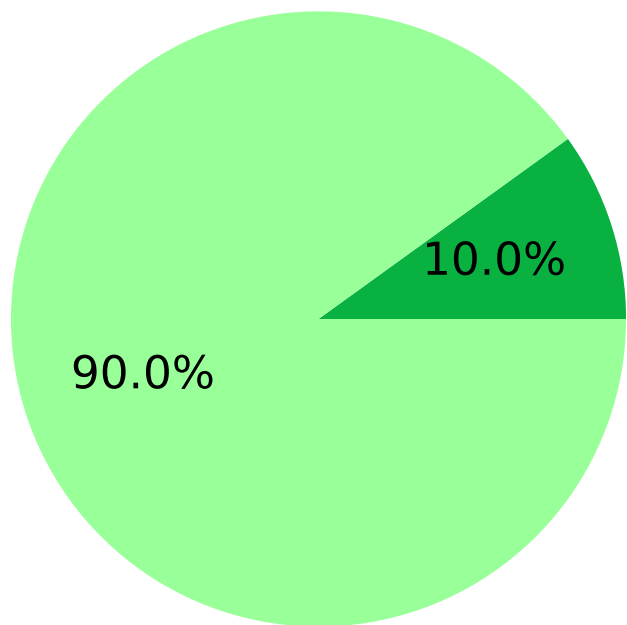

ESPRESSO ONT

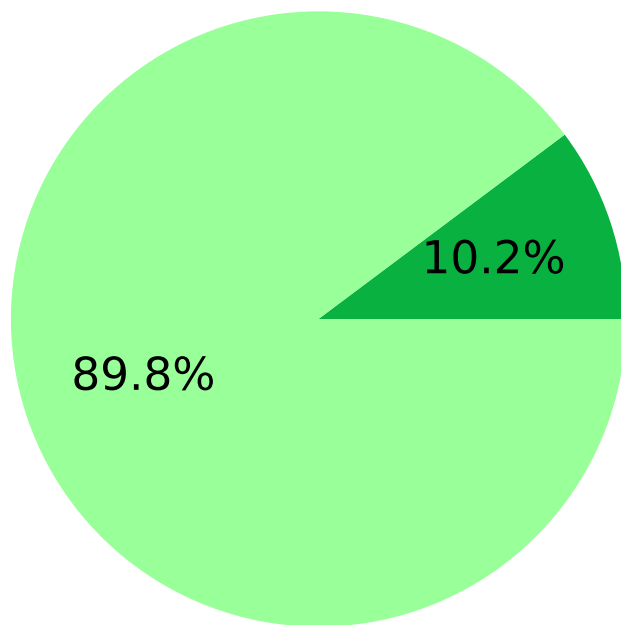

Supplement: Supplemental_code.zip [file Supplemental_Fig_S4A_pie_esp_pre.pdf › Supplemental_code/figures/Supplemental_Fig_S4/Supplemental_Fig_S4A_pie_esp_pre.pdf]

FLAIR PacBio

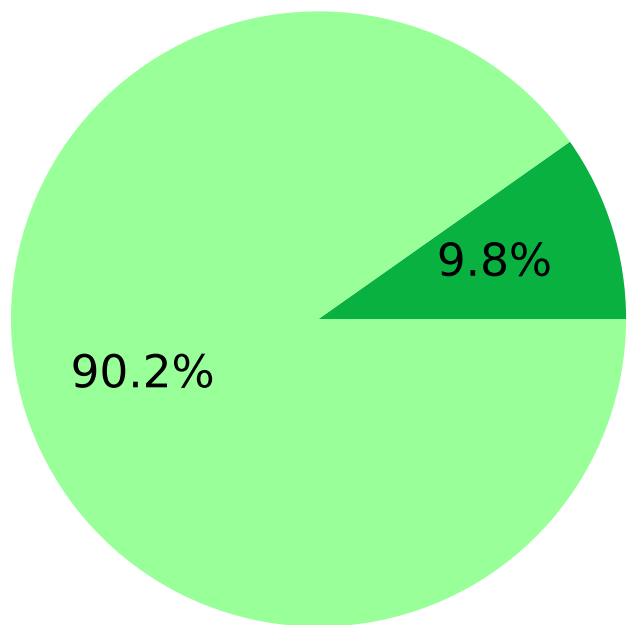

FLAIR ONT

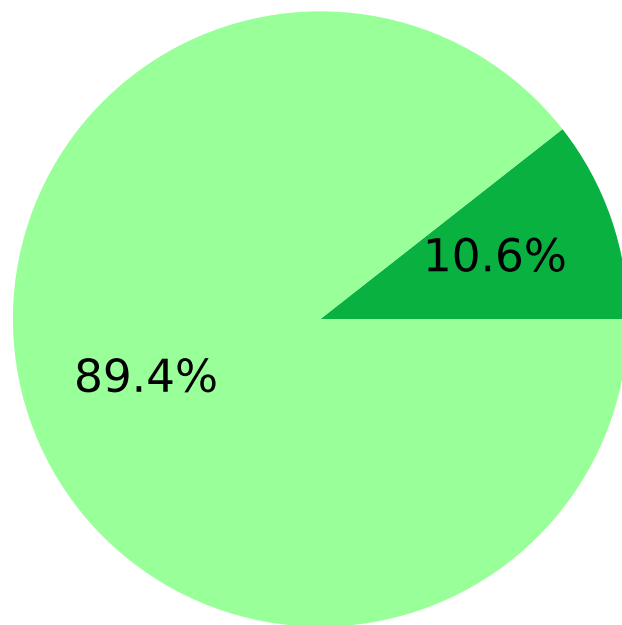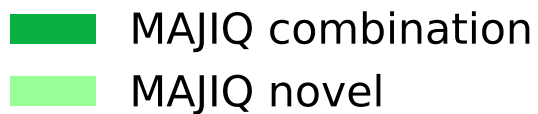

Supplement: Supplemental_code.zip [file Supplemental_Fig_S4A_pie_flair_pre.pdf › Supplemental_code/figures/Supplemental_Fig_S4/Supplemental_Fig_S4A_pie_flair_pre.pdf]

IsoQuant PacBio

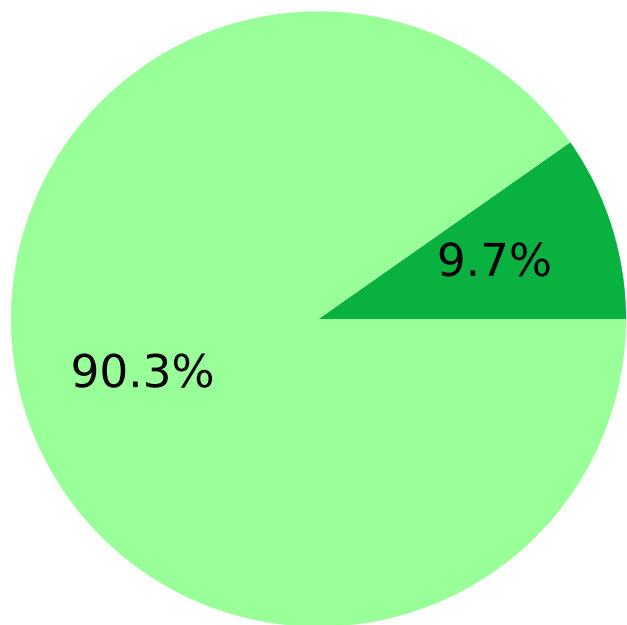

IsoQuant ONT

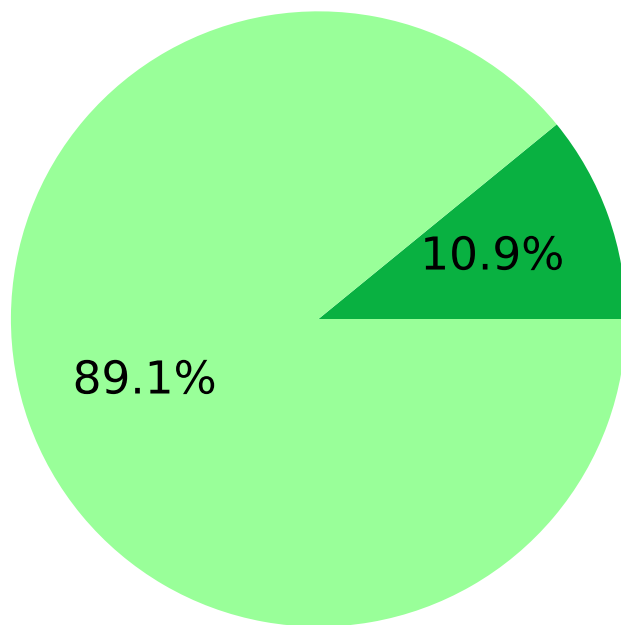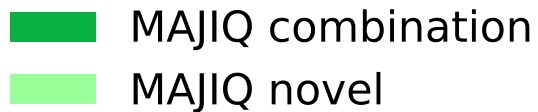

Supplement: Supplemental_code.zip [file Supplemental_Fig_S4A_pie_isq_pre.pdf › Supplemental_code/figures/Supplemental_Fig_S4/Supplemental_Fig_S4A_pie_isq_pre.pdf]

# Bambu ONT de novo junction

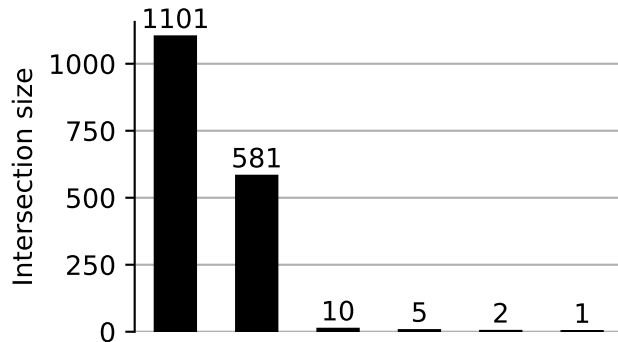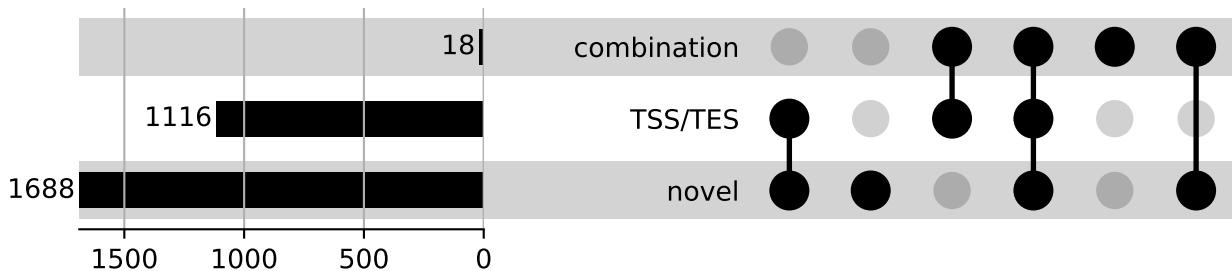

Supplement: Supplemental_code.zip [file Supplemental_Fig_S4B_upset_bambu1_ont_pre.pdf › Supplemental_code/figures/Supplemental_Fig_S4/Supplemental_Fig_S4B_upset_bambu1_ont_pre.pdf]

# Bambu PacBio de novo junction

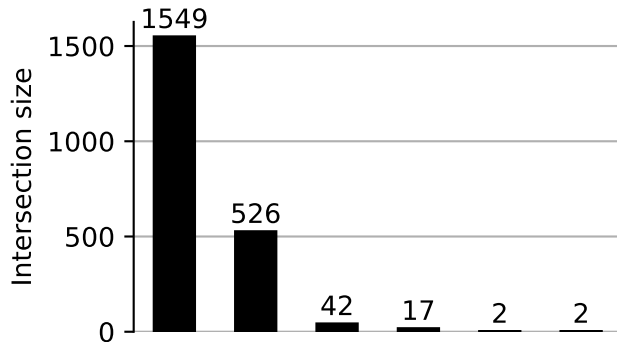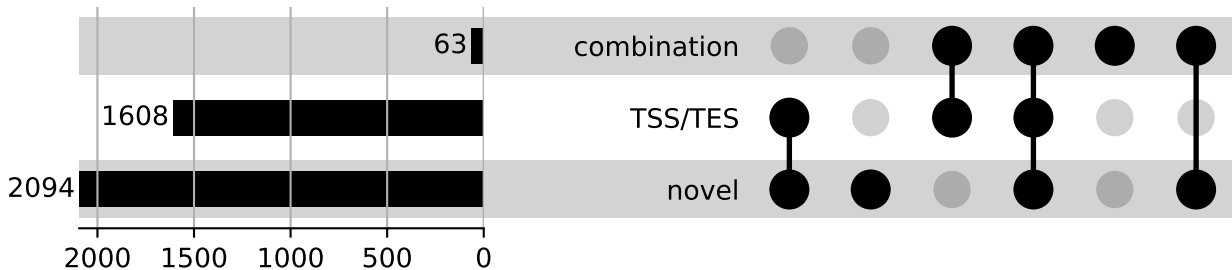

Supplement: Supplemental_code.zip [file Supplemental_Fig_S4B_upset_bambu1_pcb_pre.pdf › Supplemental_code/figures/Supplemental_Fig_S4/Supplemental_Fig_S4B_upset_bambu1_pcb_pre.pdf]

# ESPRESSO ONT de novo junction

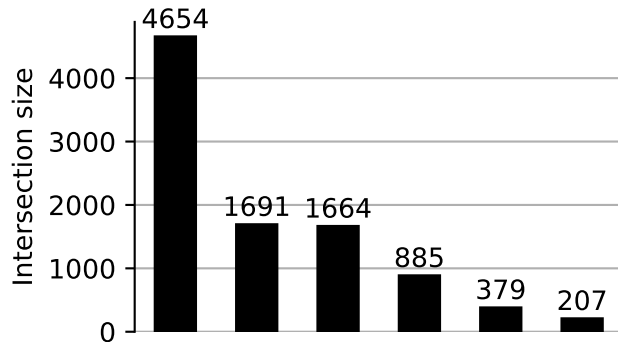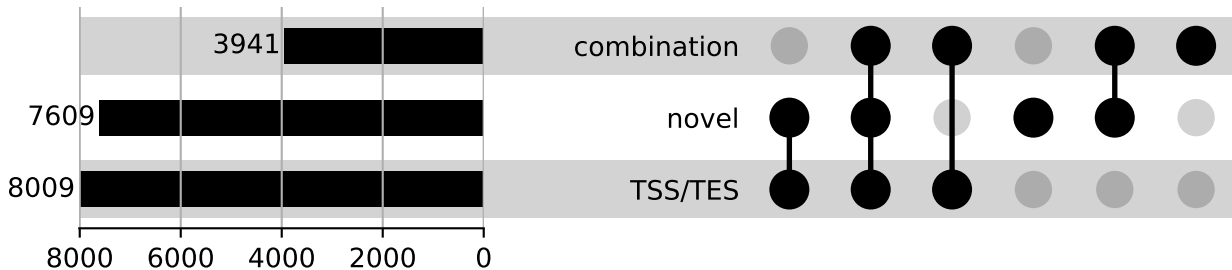

Supplement: Supplemental_code.zip [file Supplemental_Fig_S4B_upset_esp1_ont_pre.pdf › Supplemental_code/figures/Supplemental_Fig_S4/Supplemental_Fig_S4B_upset_esp1_ont_pre.pdf]

# ESPRESSO PacBio de novo junction

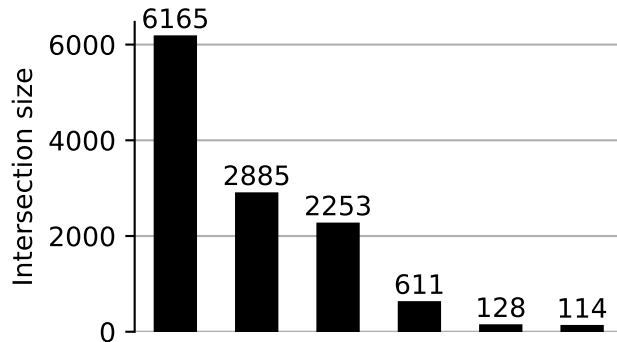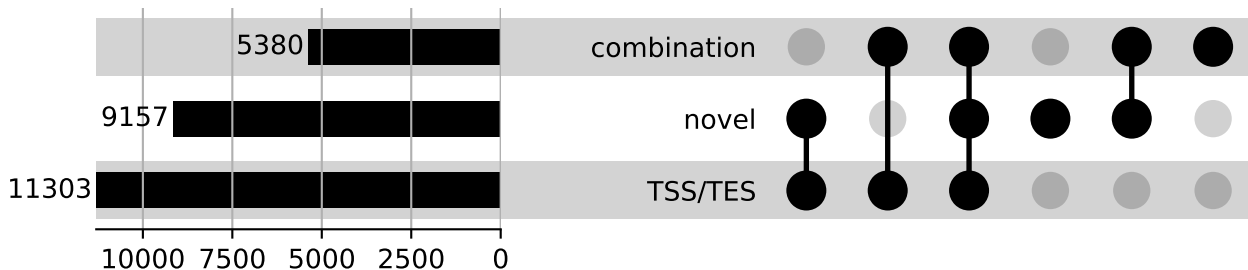

Supplement: Supplemental_code.zip [file Supplemental_Fig_S4B_upset_esp1_pcb_pre.pdf › Supplemental_code/figures/Supplemental_Fig_S4/Supplemental_Fig_S4B_upset_esp1_pcb_pre.pdf]

# FLAIR ONT de novo junction

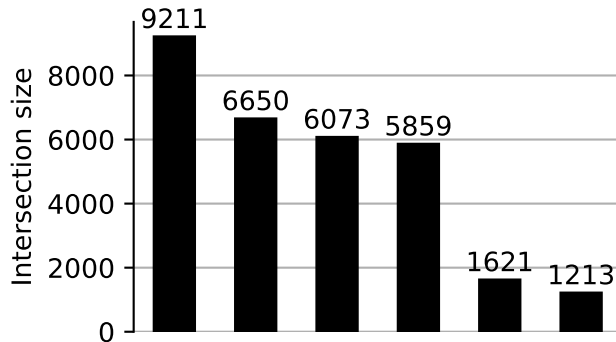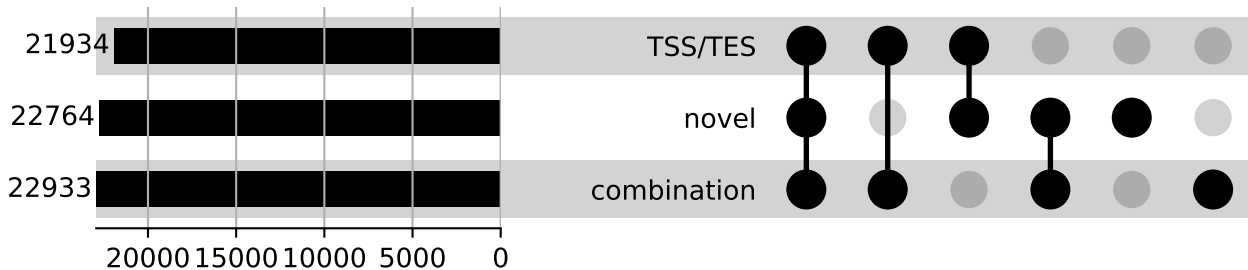

Supplement: Supplemental_code.zip [file Supplemental_Fig_S4B_upset_flair1_ont_pre.pdf › Supplemental_code/figures/Supplemental_Fig_S4/Supplemental_Fig_S4B_upset_flair1_ont_pre.pdf]

# FLAIR PacBio de novo junction

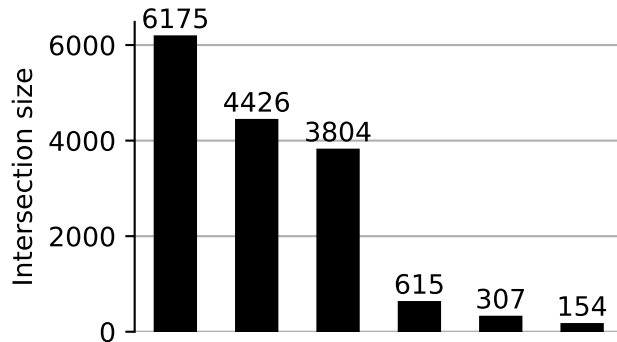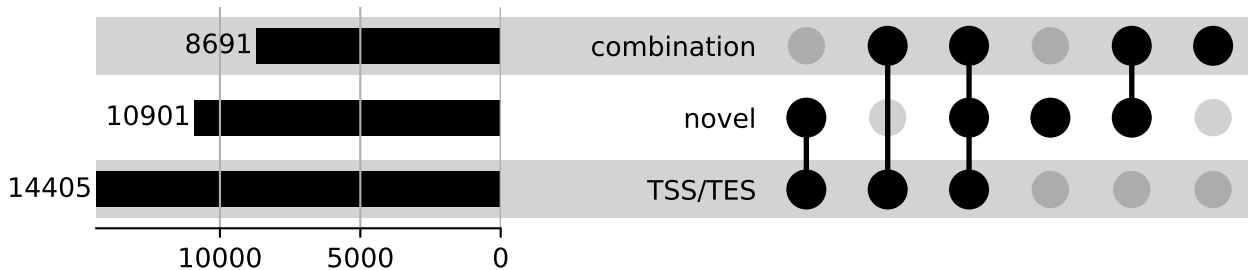

Supplement: Supplemental_code.zip [file Supplemental_Fig_S4B_upset_flair1_pcb_pre.pdf › Supplemental_code/figures/Supplemental_Fig_S4/Supplemental_Fig_S4B_upset_flair1_pcb_pre.pdf]

# IsoQuant ONT de novo junction

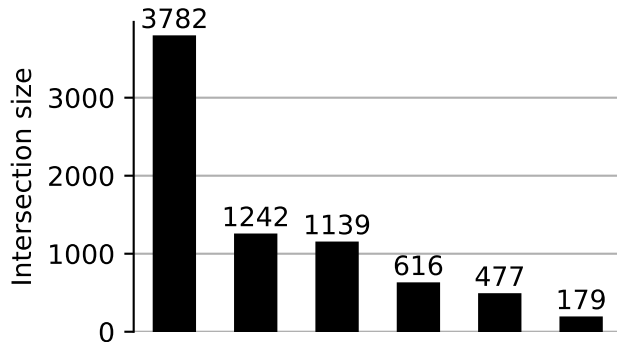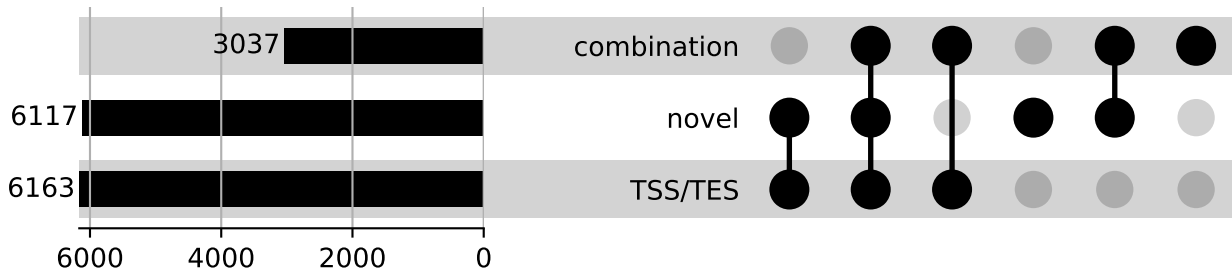

Supplement: Supplemental_code.zip [file Supplemental_Fig_S4B_upset_isq1_ont_pre.pdf › Supplemental_code/figures/Supplemental_Fig_S4/Supplemental_Fig_S4B_upset_isq1_ont_pre.pdf]

# IsoQuant PacBio de novo junction

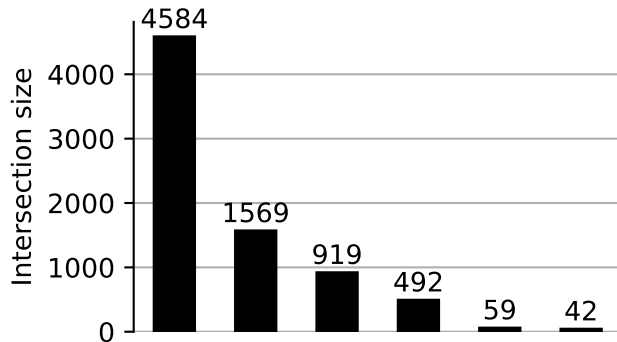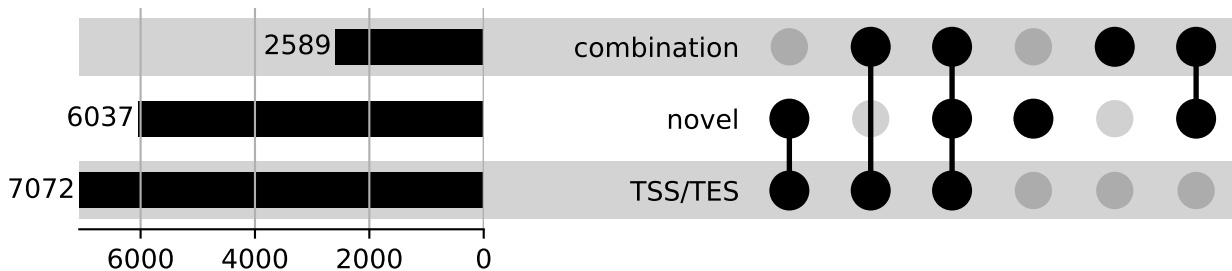

Supplement: Supplemental_code.zip [file Supplemental_Fig_S4B_upset_isq1_pcb_pre.pdf › Supplemental_code/figures/Supplemental_Fig_S4/Supplemental_Fig_S4B_upset_isq1_pcb_pre.pdf]

# Bambu ONT novel splice site

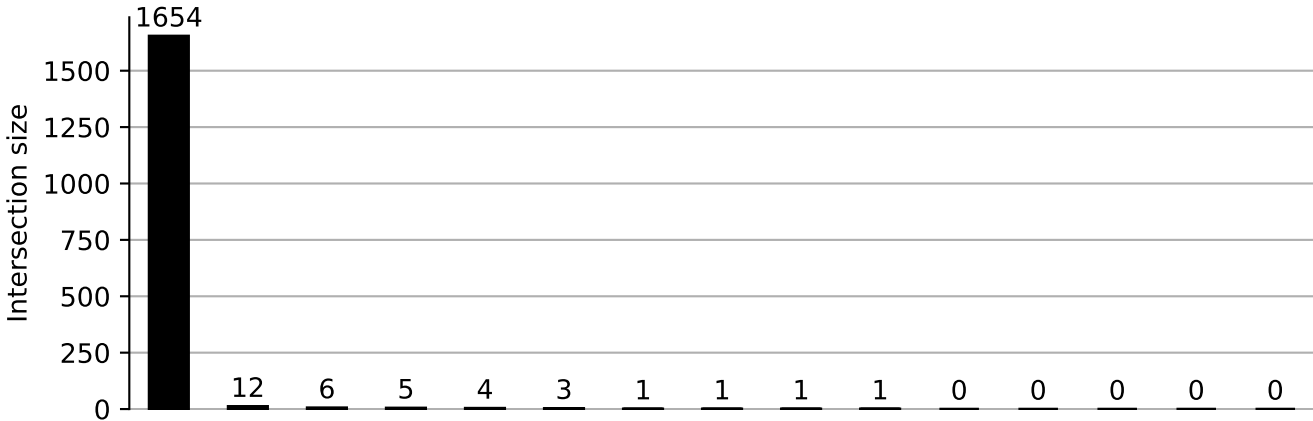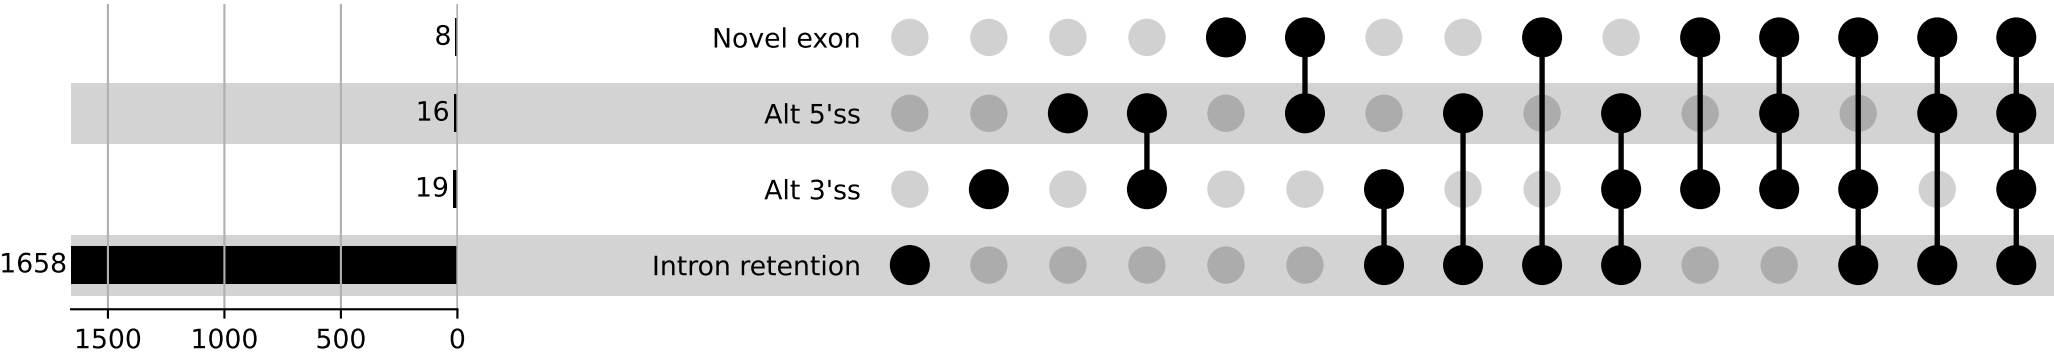

Supplement: Supplemental_code.zip [file Supplemental_Fig_S4C_upset_bambu2_ont_pre.pdf › Supplemental_code/figures/Supplemental_Fig_S4/Supplemental_Fig_S4C_upset_bambu2_ont_pre.pdf]

# ESPRESSO PacBio novel splice site

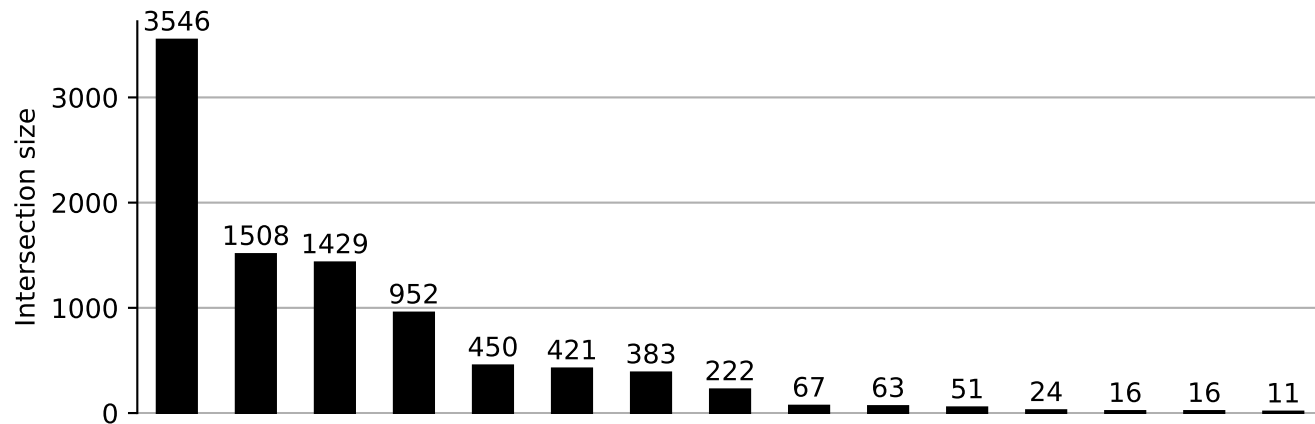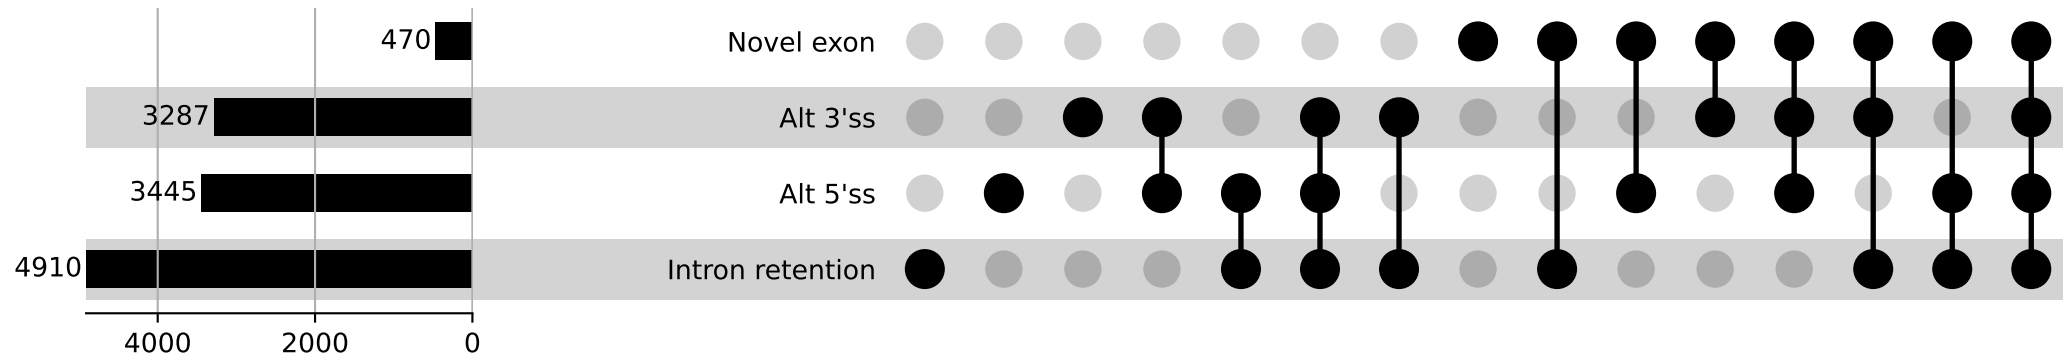

Supplement: Supplemental_code.zip [file Supplemental_Fig_S4C_upset_esp2_pcb_pre.pdf › Supplemental_code/figures/Supplemental_Fig_S4/Supplemental_Fig_S4C_upset_esp2_pcb_pre.pdf]

All1807: FLAIR ONT

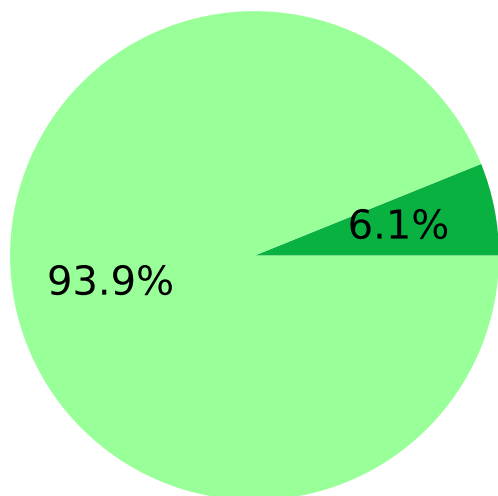

All1807: IsoQuant ONT

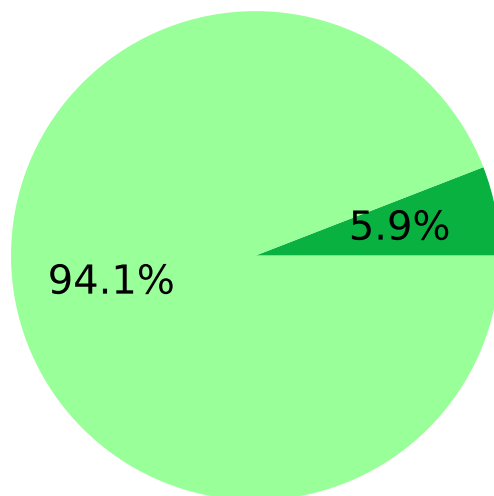

All1807: ESPRESSO ONT

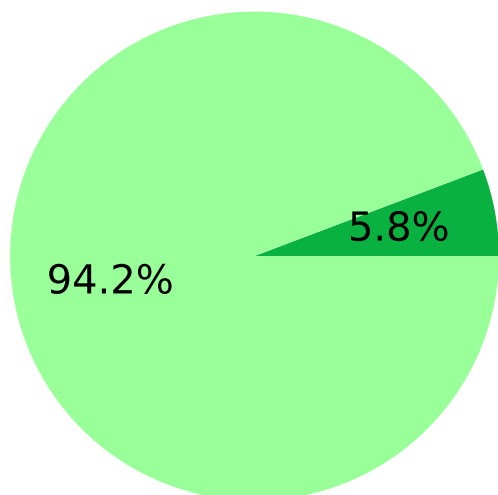

All1807: Bambu ONT

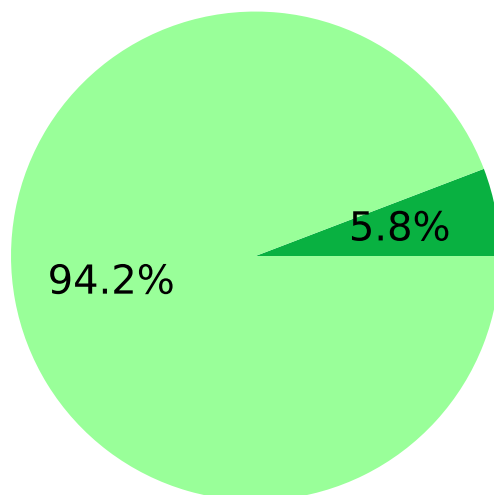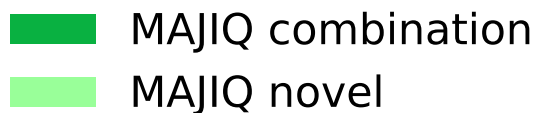

Supplement: Supplemental_code.zip [file Supplemental_Fig_S5A_pie_andrie_post.pdf › Supplemental_code/figures/Supplemental_Fig_S5/Supplemental_Fig_S5A_pie_andrie_post.pdf]

# GTE<sub>x</sub>: FLAIR ONT

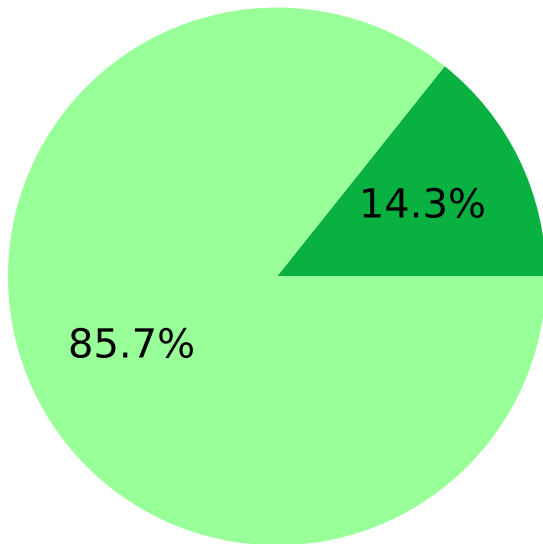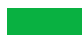

MAJIQ combination

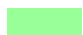

MAJIQ novel

Supplement: Supplemental_code.zip [file Supplemental_Fig_S5A_pie_gtex_post.pdf › Supplemental_code/figures/Supplemental_Fig_S5/Supplemental_Fig_S5A_pie_gtex_post.pdf]

# All1807: Bambu ONT de novo junction

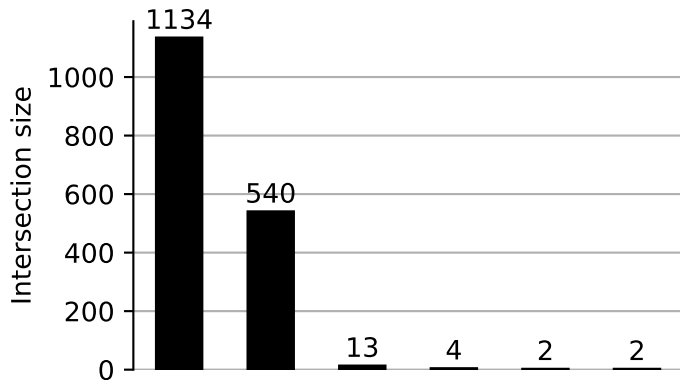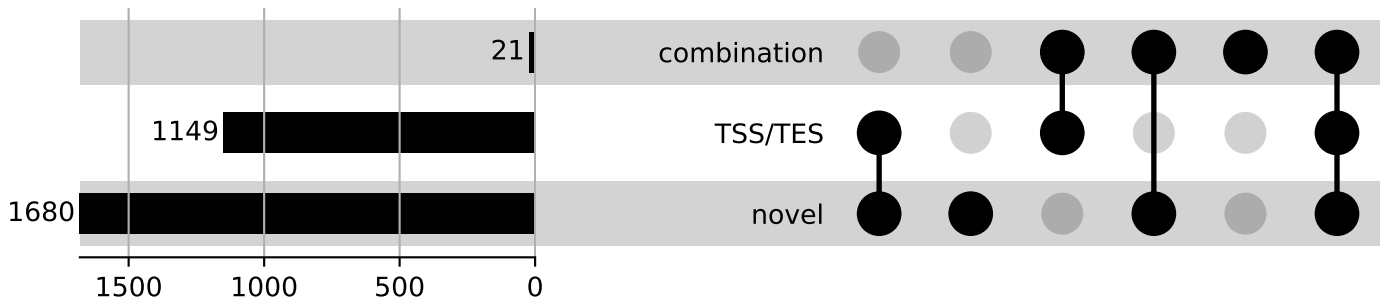

Supplement: Supplemental_code.zip [file Supplemental_Fig_S5B_upset_bambu1_andrei_post.pdf › Supplemental_code/figures/Supplemental_Fig_S5/Supplemental_Fig_S5B_upset_bambu1_andrei_post.pdf]

# All1807: ESPRESSO ONT de novo junction

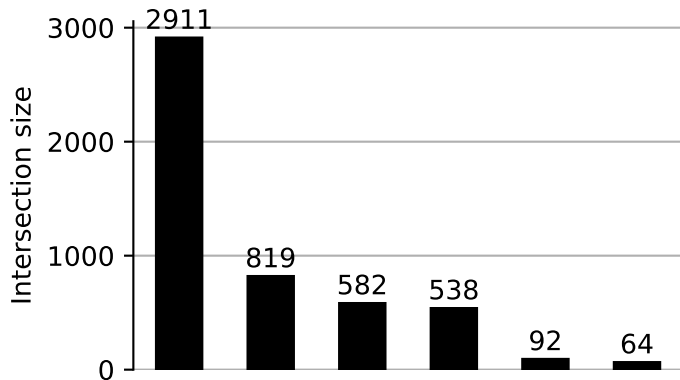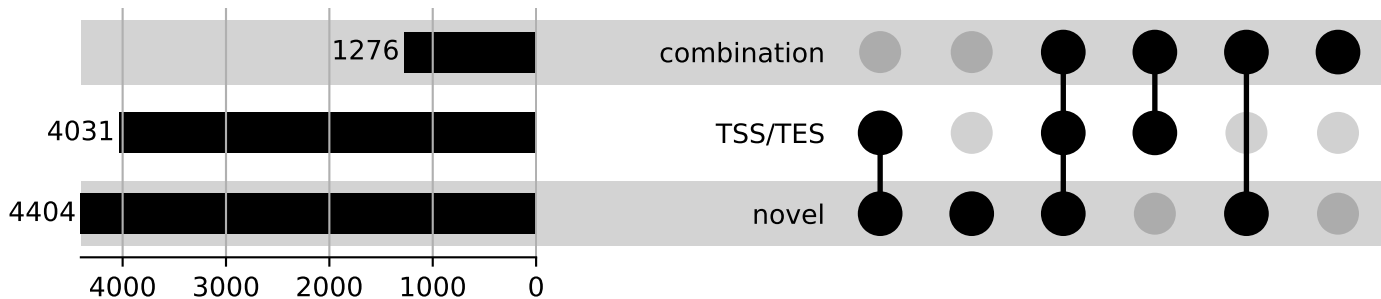

Supplement: Supplemental_code.zip [file Supplemental_Fig_S5B_upset_esp1_andrei_post.pdf › Supplemental_code/figures/Supplemental_Fig_S5/Supplemental_Fig_S5B_upset_esp1_andrei_post.pdf]

# All1807: FLAIR ONT de novo junction

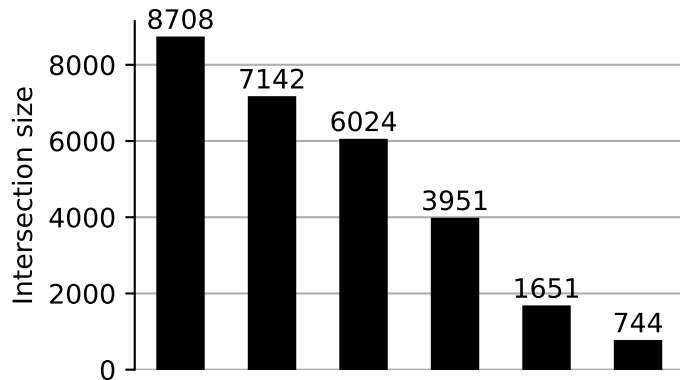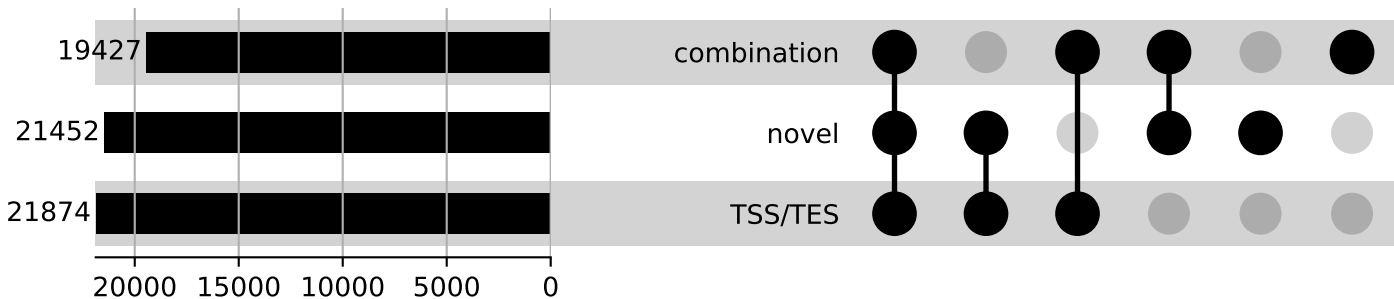

Supplement: Supplemental_code.zip [file Supplemental_Fig_S5B_upset_flair1_andrei_post.pdf › Supplemental_code/figures/Supplemental_Fig_S5/Supplemental_Fig_S5B_upset_flair1_andrei_post.pdf]

# GTEx Heart atrial appendage FLAIR ONT de novo junction

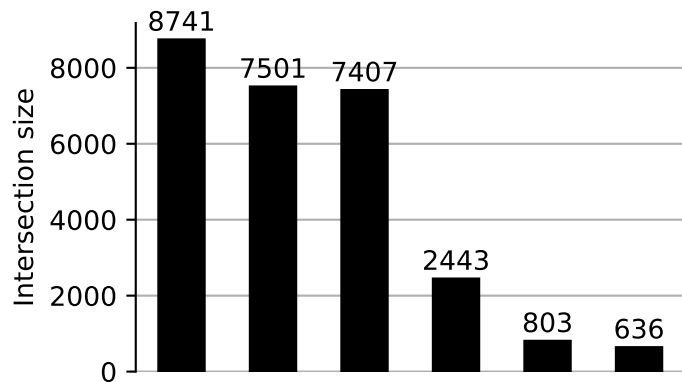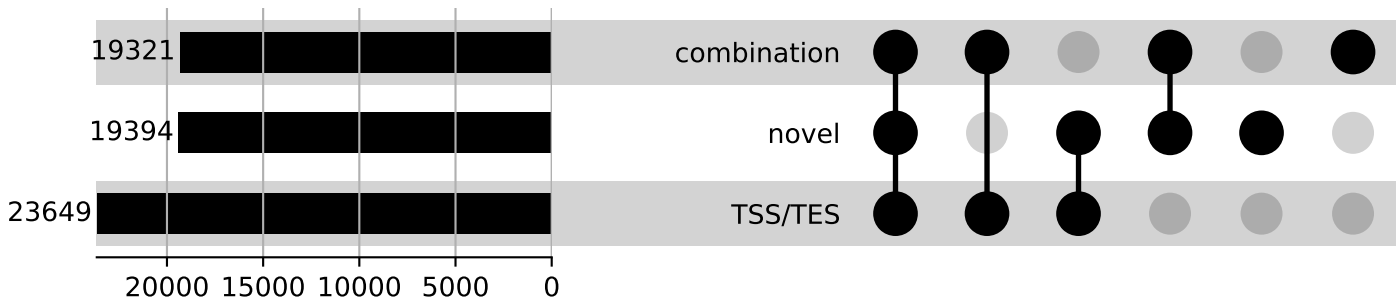

Supplement: Supplemental_code.zip [file Supplemental_Fig_S5B_upset_flair1_gtex_post.pdf › Supplemental_code/figures/Supplemental_Fig_S5/Supplemental_Fig_S5B_upset_flair1_gtex_post.pdf]

# All1807: IsoQuant ONT de novo junction

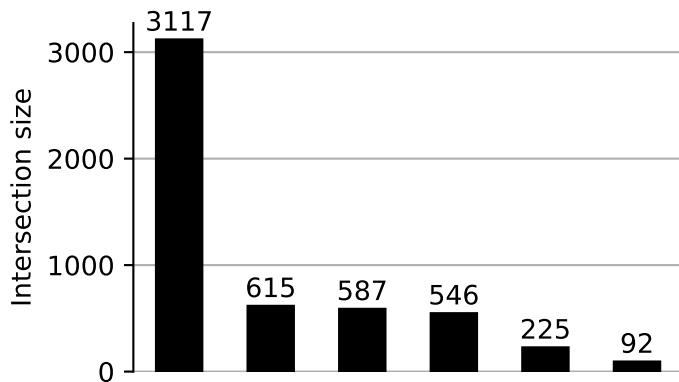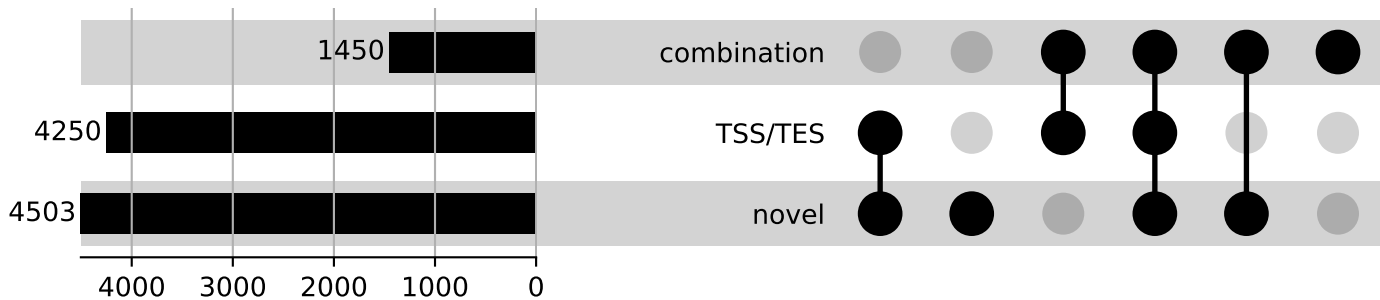

Supplement: Supplemental_code.zip [file Supplemental_Fig_S5B_upset_isq1_andrei_post.pdf › Supplemental_code/figures/Supplemental_Fig_S5/Supplemental_Fig_S5B_upset_isq1_andrei_post.pdf]

# All1807: Bambu ONT novel splice site

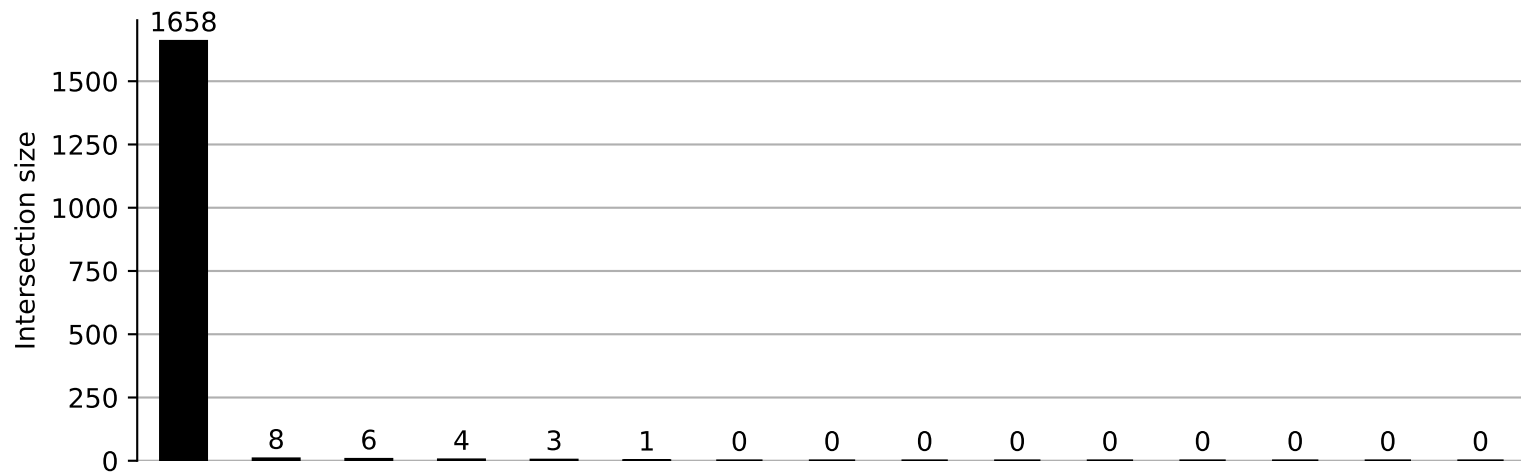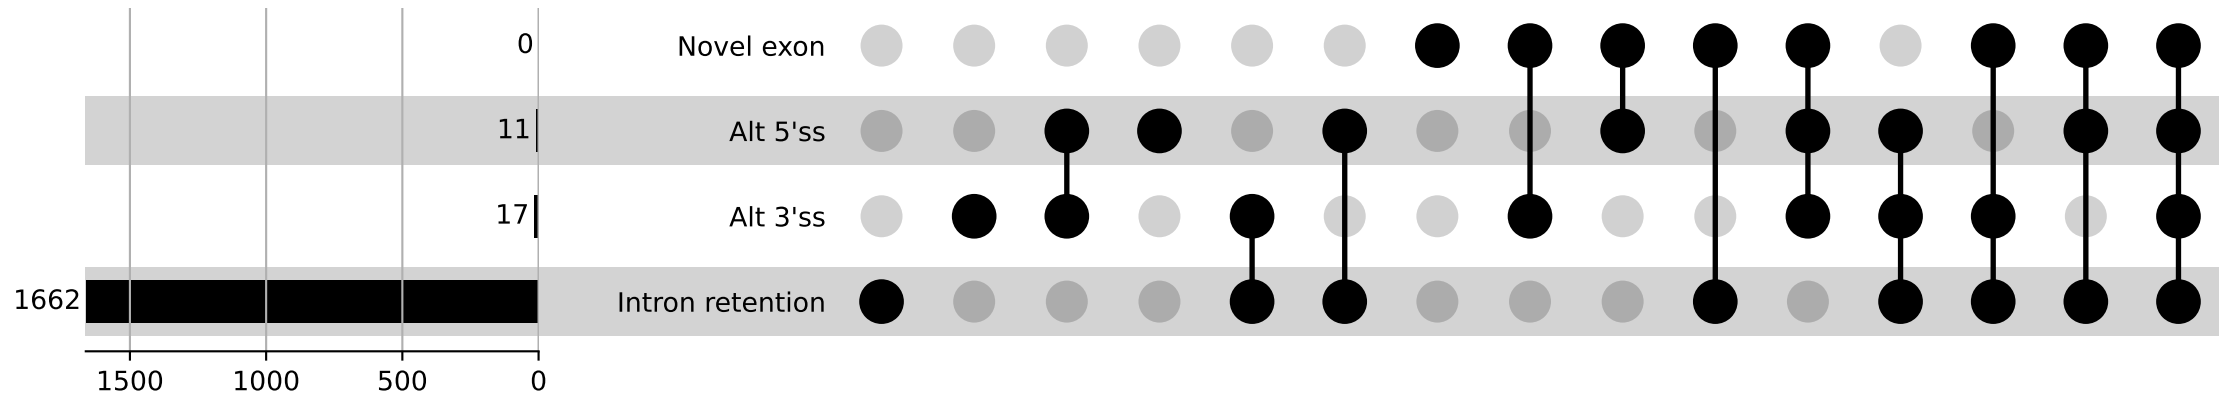

Supplement: Supplemental_code.zip [file Supplemental_Fig_S5C_upset_bambu2_andrei_post.pdf › Supplemental_code/figures/Supplemental_Fig_S5/Supplemental_Fig_S5C_upset_bambu2_andrei_post.pdf]

# All1807: ESPRESSO ONT novel splice site

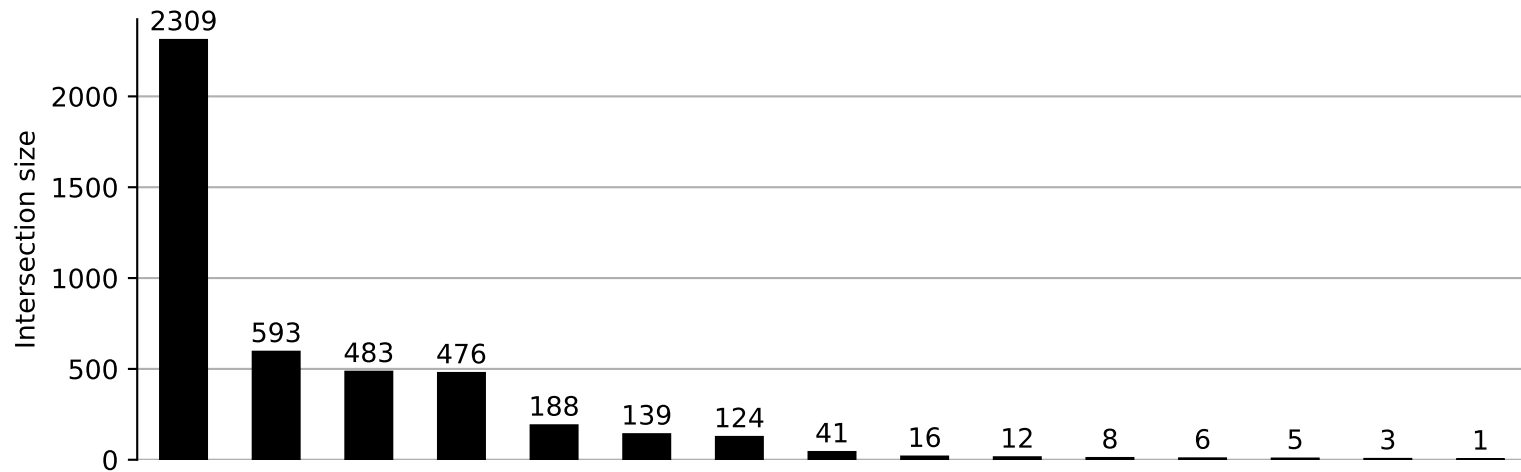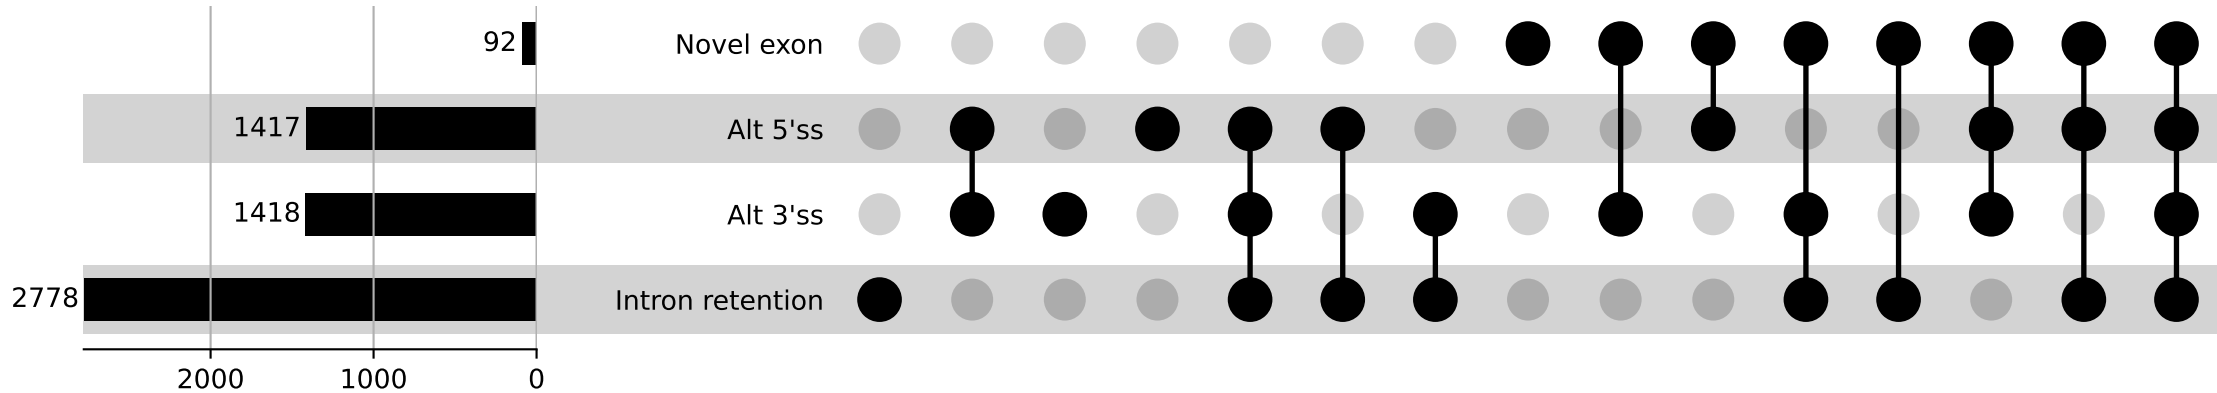

Supplement: Supplemental_code.zip [file Supplemental_Fig_S5C_upset_esp2_andrei_post.pdf › Supplemental_code/figures/Supplemental_Fig_S5/Supplemental_Fig_S5C_upset_esp2_andrei_post.pdf]

# All1807: FLAIR ONT novel splice site

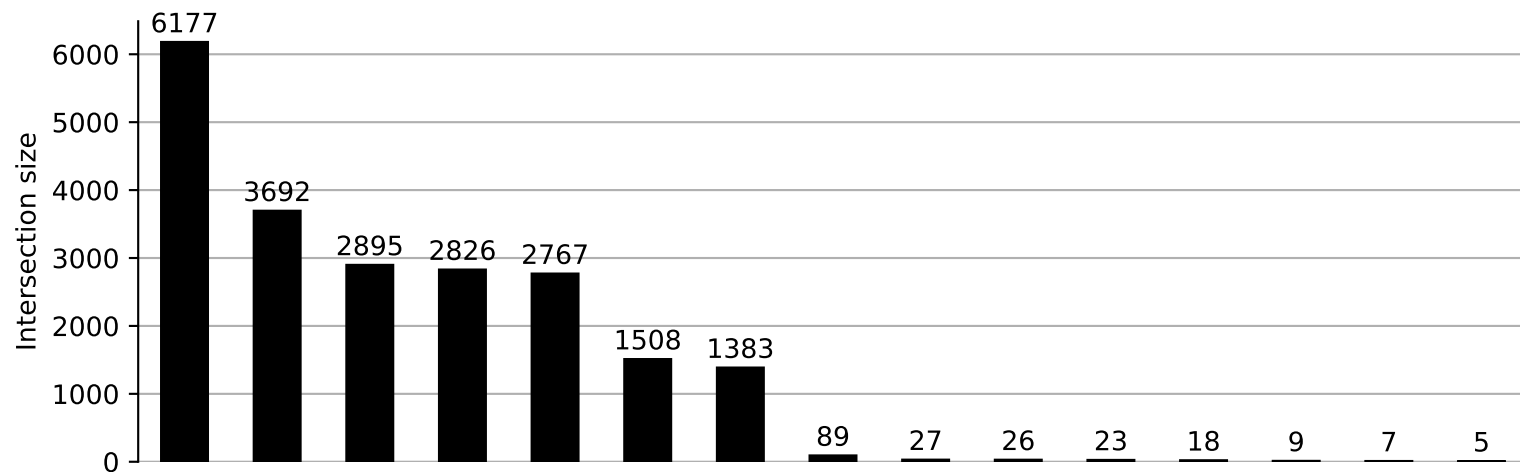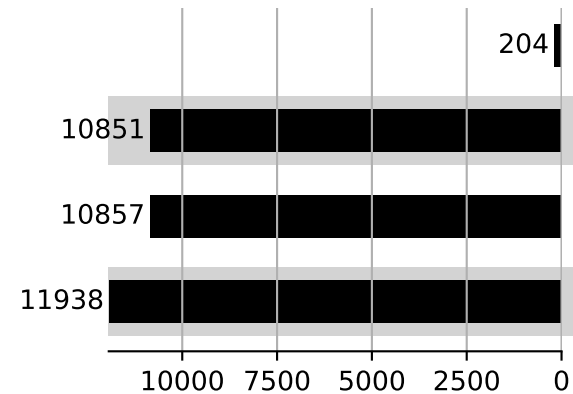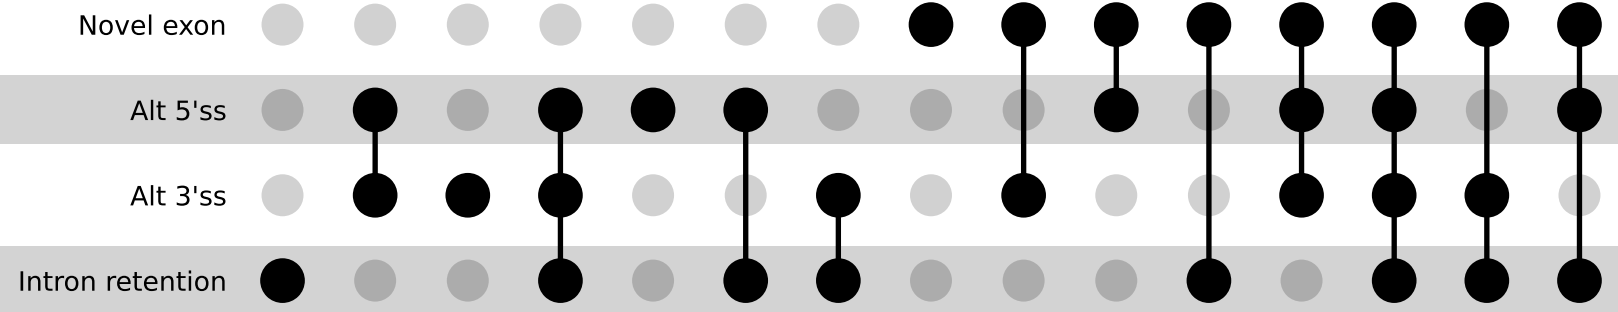

Supplement: Supplemental_code.zip [file Supplemental_Fig_S5C_upset_flair2_andrei_post.pdf › Supplemental_code/figures/Supplemental_Fig_S5/Supplemental_Fig_S5C_upset_flair2_andrei_post.pdf]

# GTEx Heart atrial appendage FLAIR ONT novel splice site

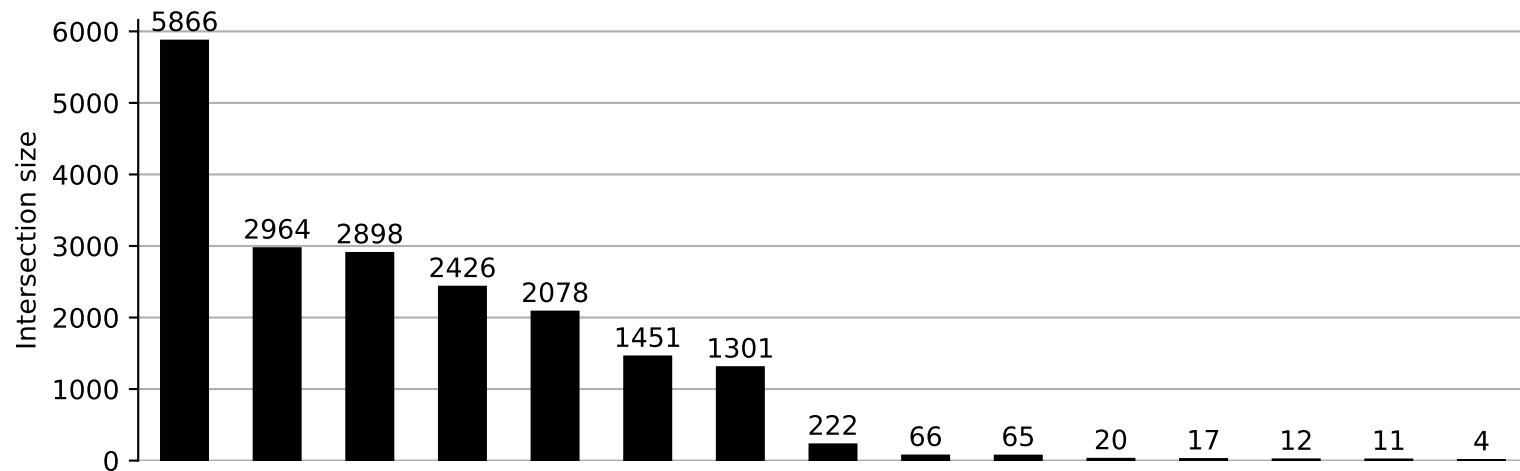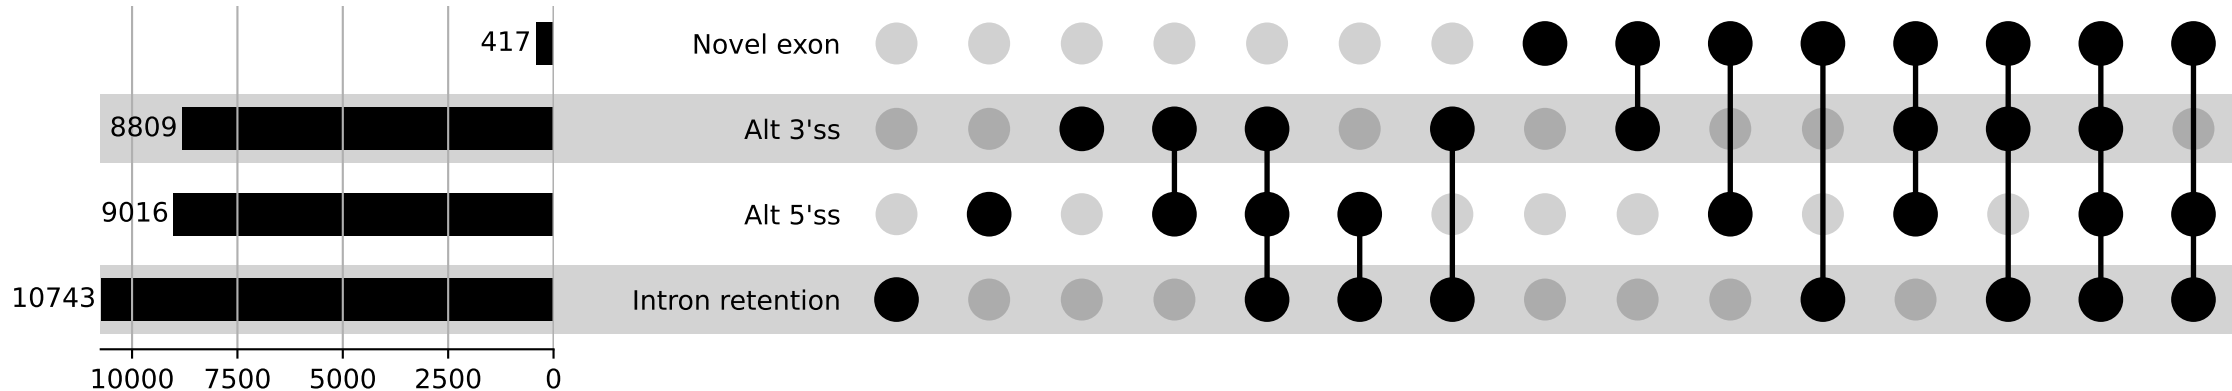

Supplement: Supplemental_code.zip [file Supplemental_Fig_S5C_upset_flair2_gtex_post.pdf › Supplemental_code/figures/Supplemental_Fig_S5/Supplemental_Fig_S5C_upset_flair2_gtex_post.pdf]

## All1807: IsoQuant ONT novel splice site

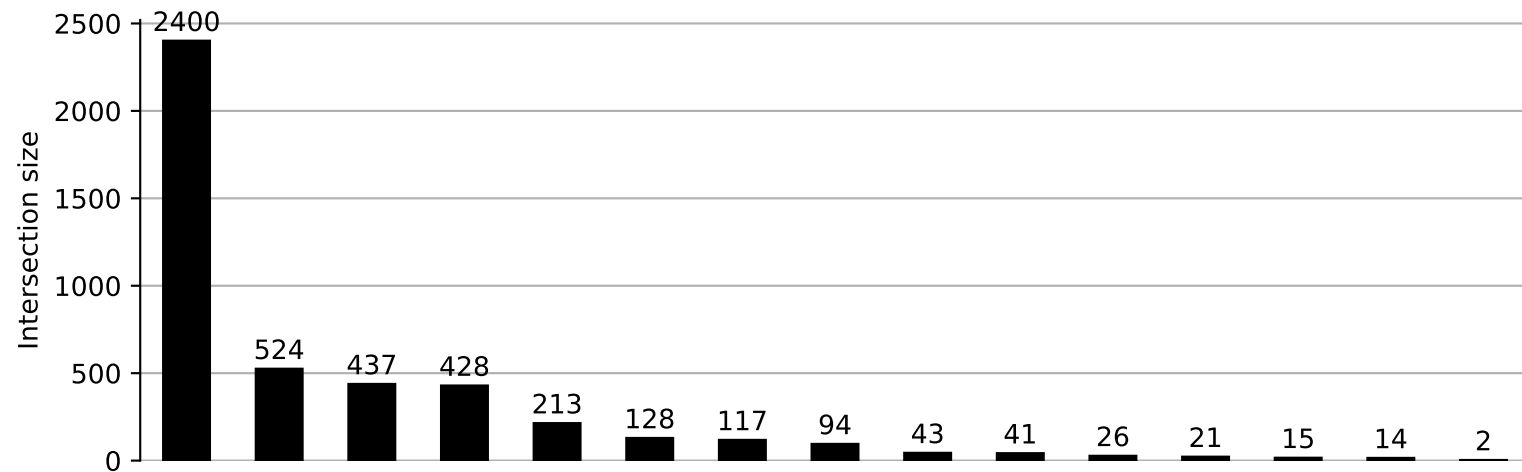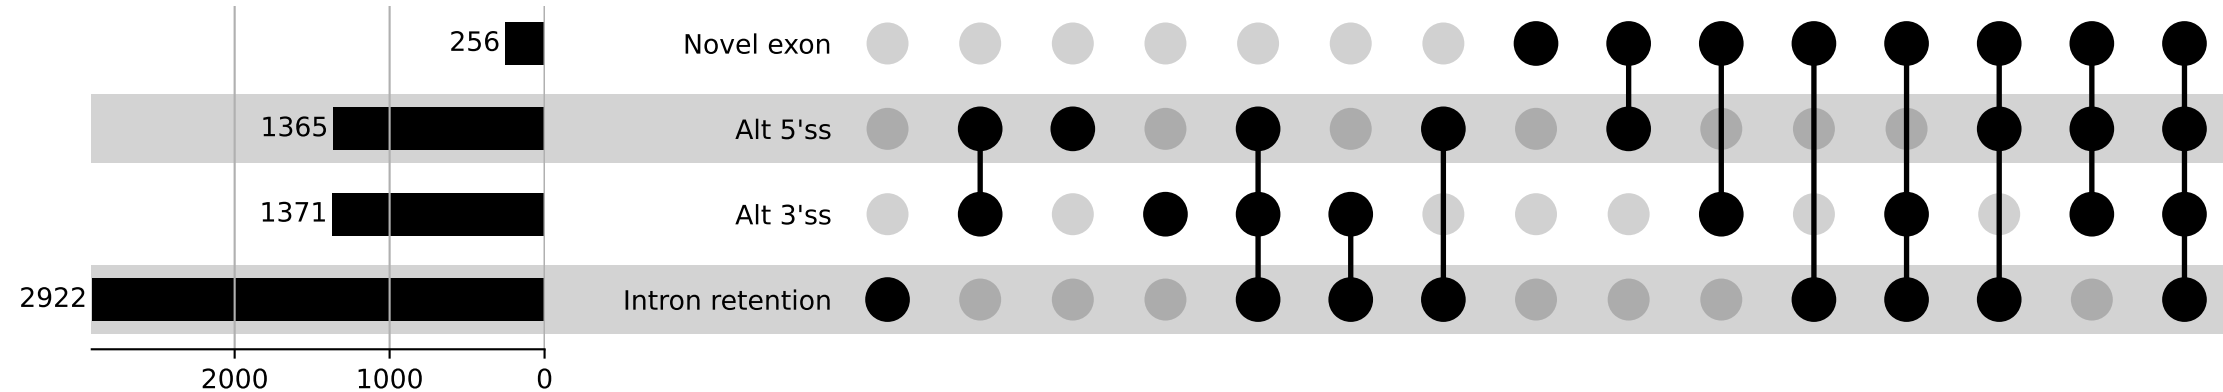

Supplement: Supplemental_code.zip [file Supplemental_Fig_S5C_upset_isq2_andrei_post.pdf › Supplemental_code/figures/Supplemental_Fig_S5/Supplemental_Fig_S5C_upset_isq2_andrei_post.pdf]

All1807: FLAIR ONT

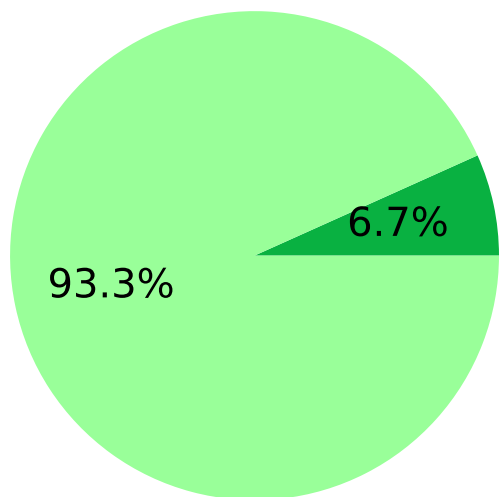

All1807: IsoQuant ONT

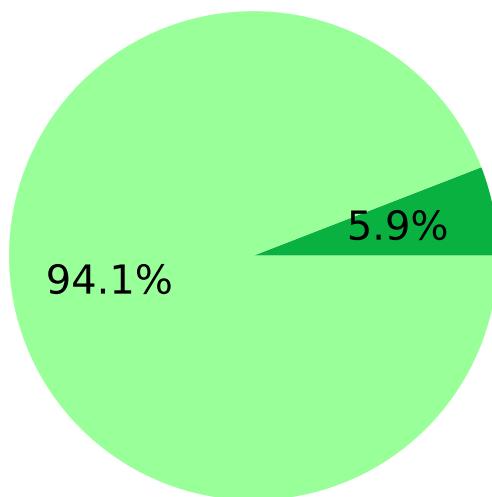

All1807: ESPRESSO ONT

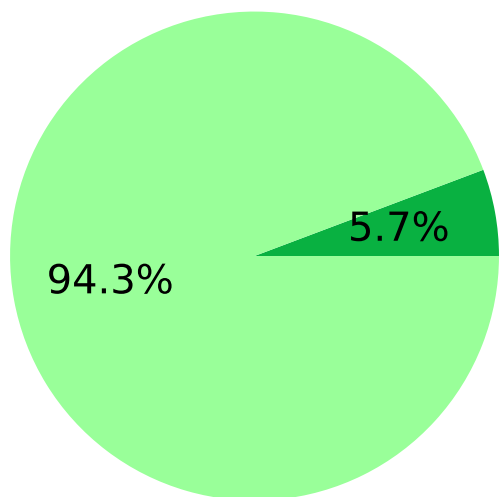

All1807: Bambu ONT

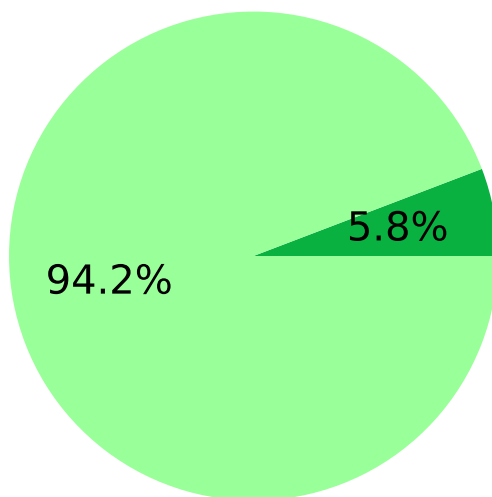

Supplement: Supplemental_code.zip [file Supplemental_Fig_S6A_pie_andrie_pre.pdf › Supplemental_code/figures/Supplemental_Fig_S6/Supplemental_Fig_S6A_pie_andrie_pre.pdf]

# GTE<sub>x</sub>: FLAIR ONT

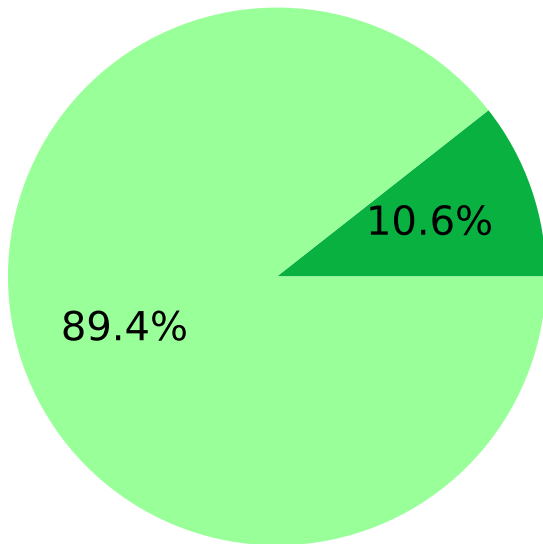

MAJIQ combination



MAJIQ novel

Supplement: Supplemental_code.zip [file Supplemental_Fig_S6A_pie_gtex_pre.pdf › Supplemental_code/figures/Supplemental_Fig_S6/Supplemental_Fig_S6A_pie_gtex_pre.pdf]

# All1807: Bambu ONT de novo junction

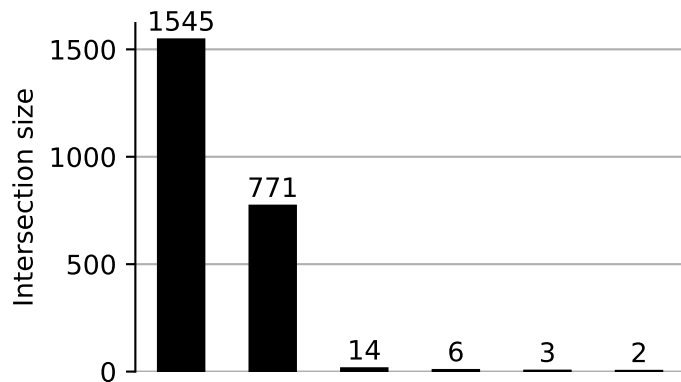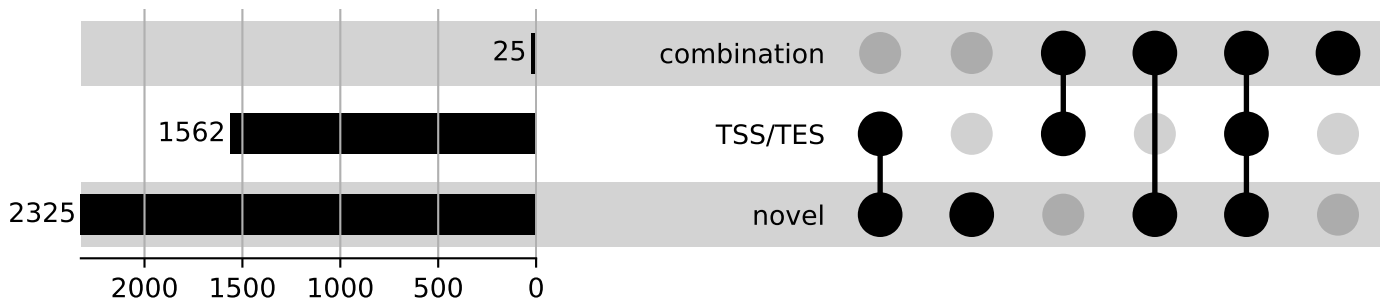

Supplement: Supplemental_code.zip [file Supplemental_Fig_S6B_upset_bambu1_andrei_pre.pdf › Supplemental_code/figures/Supplemental_Fig_S6/Supplemental_Fig_S6B_upset_bambu1_andrei_pre.pdf]

# All1807: ESPRESSO ONT de novo junction

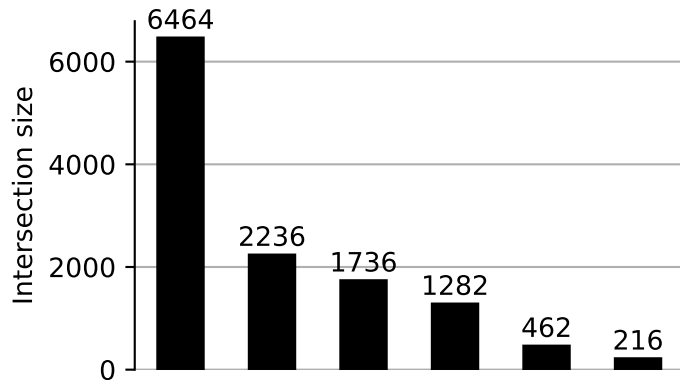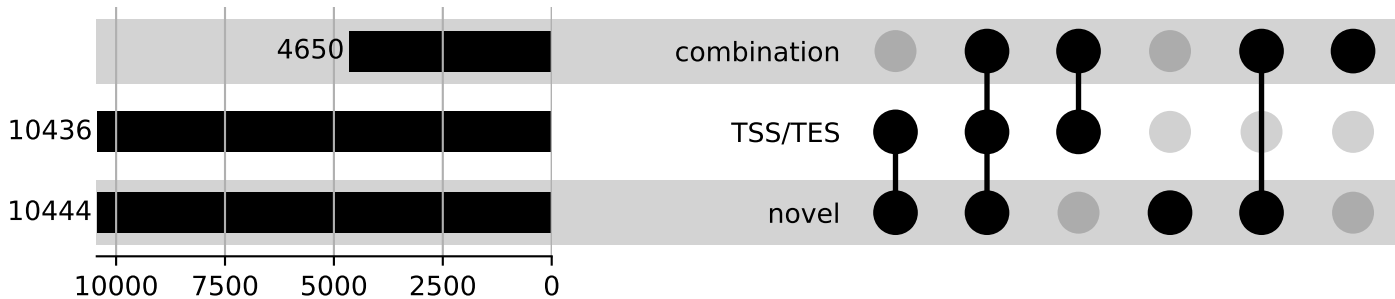

Supplement: Supplemental_code.zip [file Supplemental_Fig_S6B_upset_esp1_andrei_pre.pdf › Supplemental_code/figures/Supplemental_Fig_S6/Supplemental_Fig_S6B_upset_esp1_andrei_pre.pdf]

# All1807: FLAIR ONT de novo junction

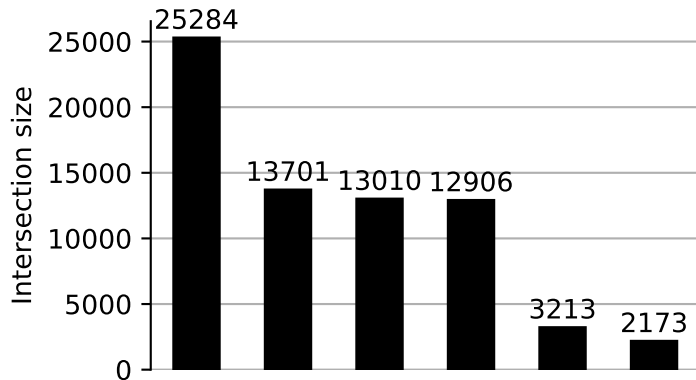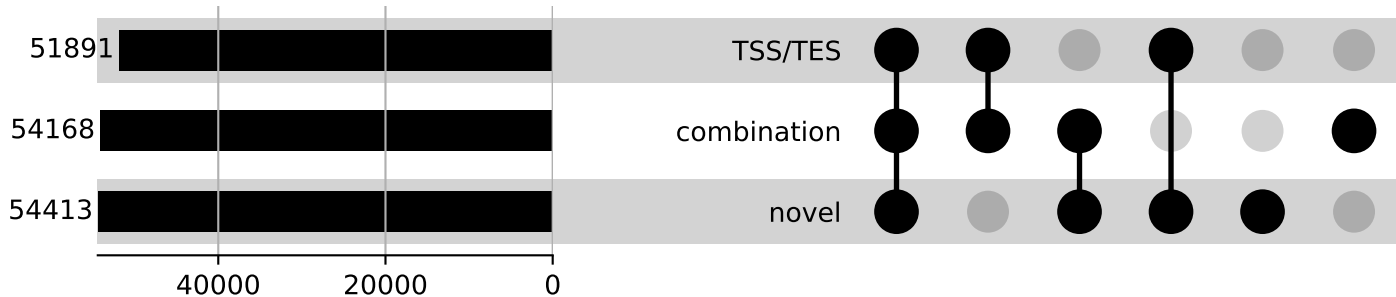

Supplement: Supplemental_code.zip [file Supplemental_Fig_S6B_upset_flair1_andrei_pre.pdf › Supplemental_code/figures/Supplemental_Fig_S6/Supplemental_Fig_S6B_upset_flair1_andrei_pre.pdf]

# GTEX Heart atrial appendage FLAIR ONT de novo junction

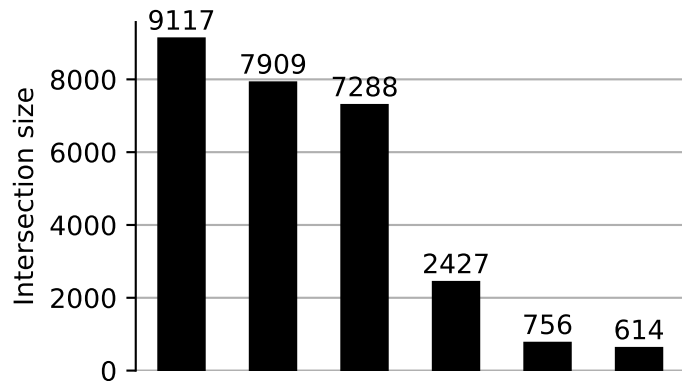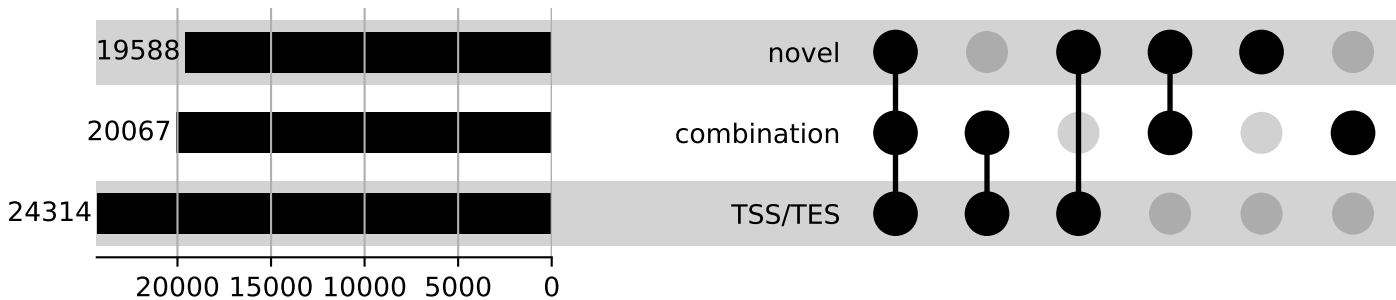

Supplement: Supplemental_code.zip [file Supplemental_Fig_S6B_upset_flair1_gtex_pre.pdf › Supplemental_code/figures/Supplemental_Fig_S6/Supplemental_Fig_S6B_upset_flair1_gtex_pre.pdf]

# All1807: IsoQuant ONT de novo junction

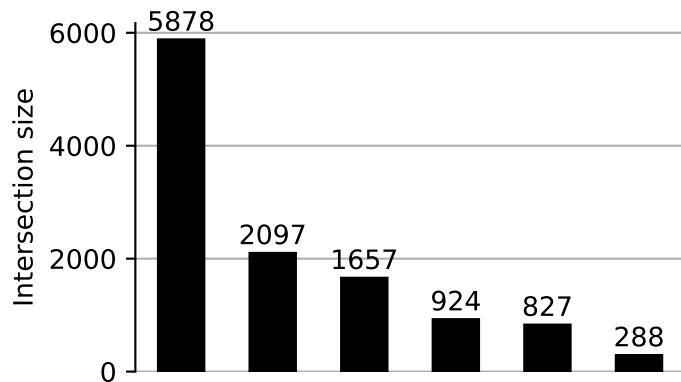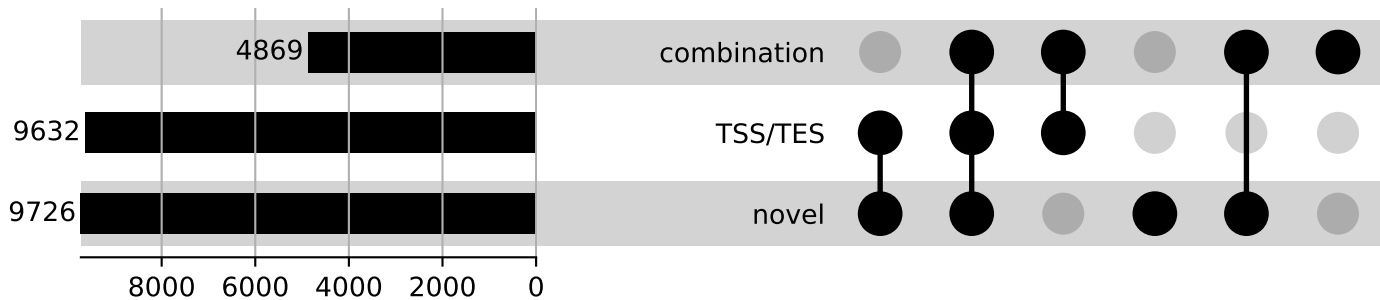

Supplement: Supplemental_code.zip [file Supplemental_Fig_S6B_upset_isq1_andrei_pre.pdf › Supplemental_code/figures/Supplemental_Fig_S6/Supplemental_Fig_S6B_upset_isq1_andrei_pre.pdf]

# All1807: Bambu ONT novel splice site

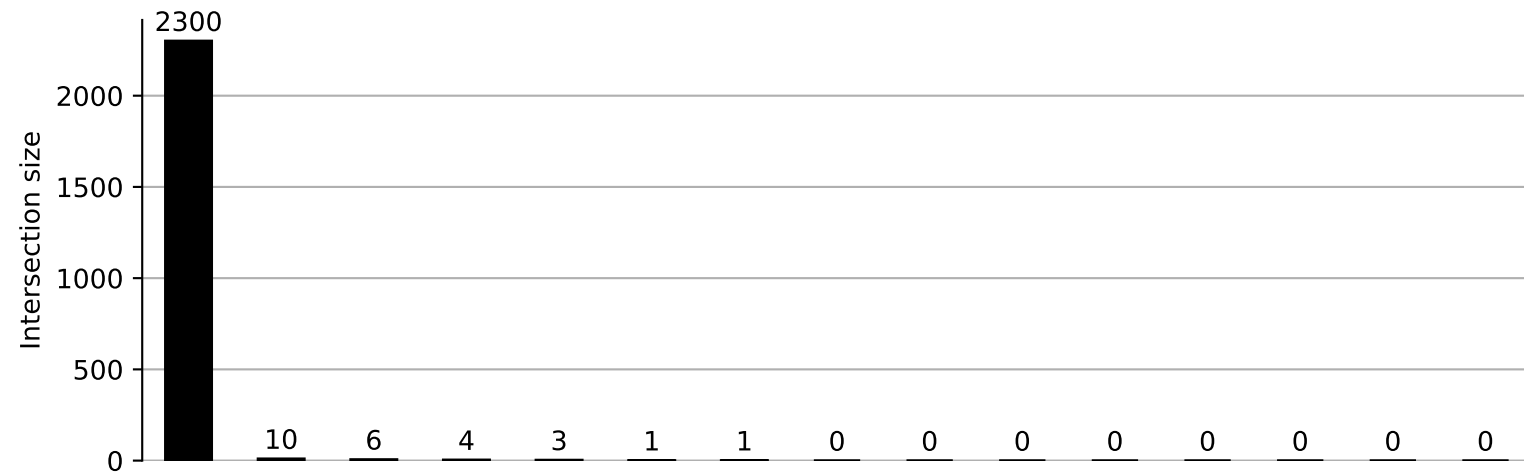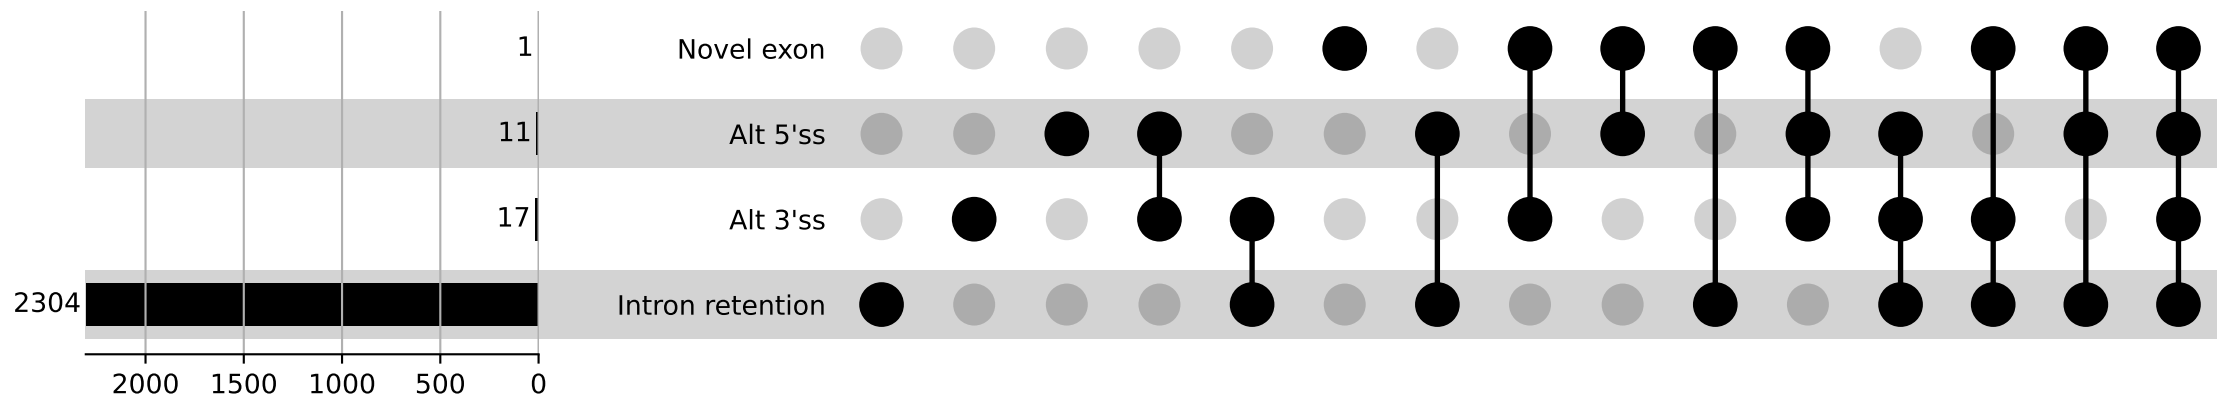

Supplement: Supplemental_code.zip [file Supplemental_Fig_S6C_upset_bambu2_andrei_pre.pdf › Supplemental_code/figures/Supplemental_Fig_S6/Supplemental_Fig_S6C_upset_bambu2_andrei_pre.pdf]

# All1807: ESPRESSO ONT novel splice site

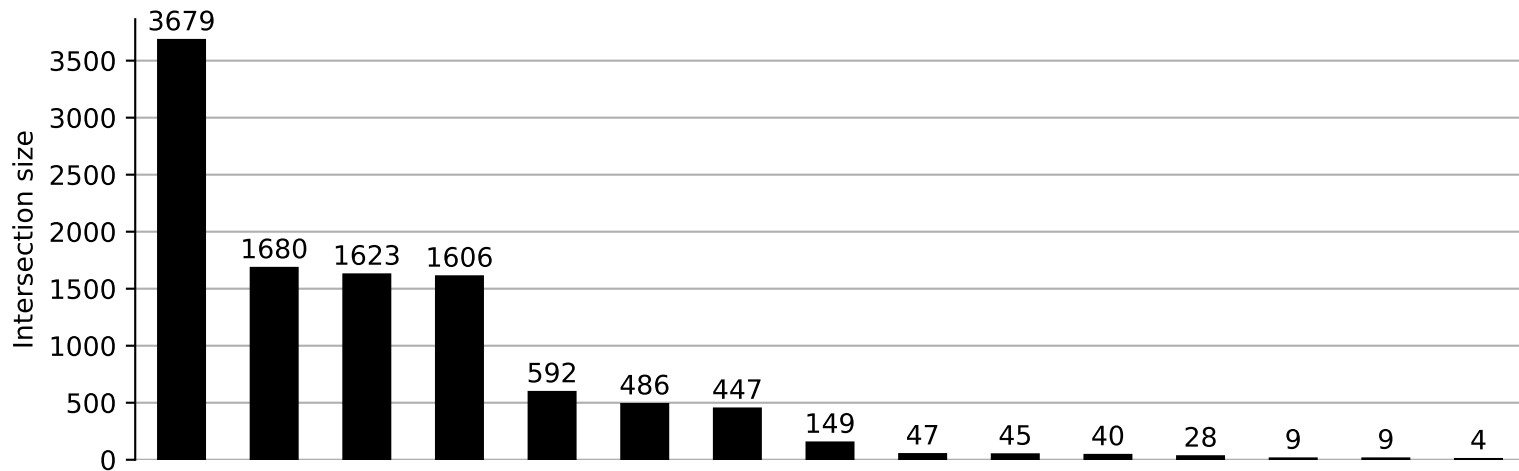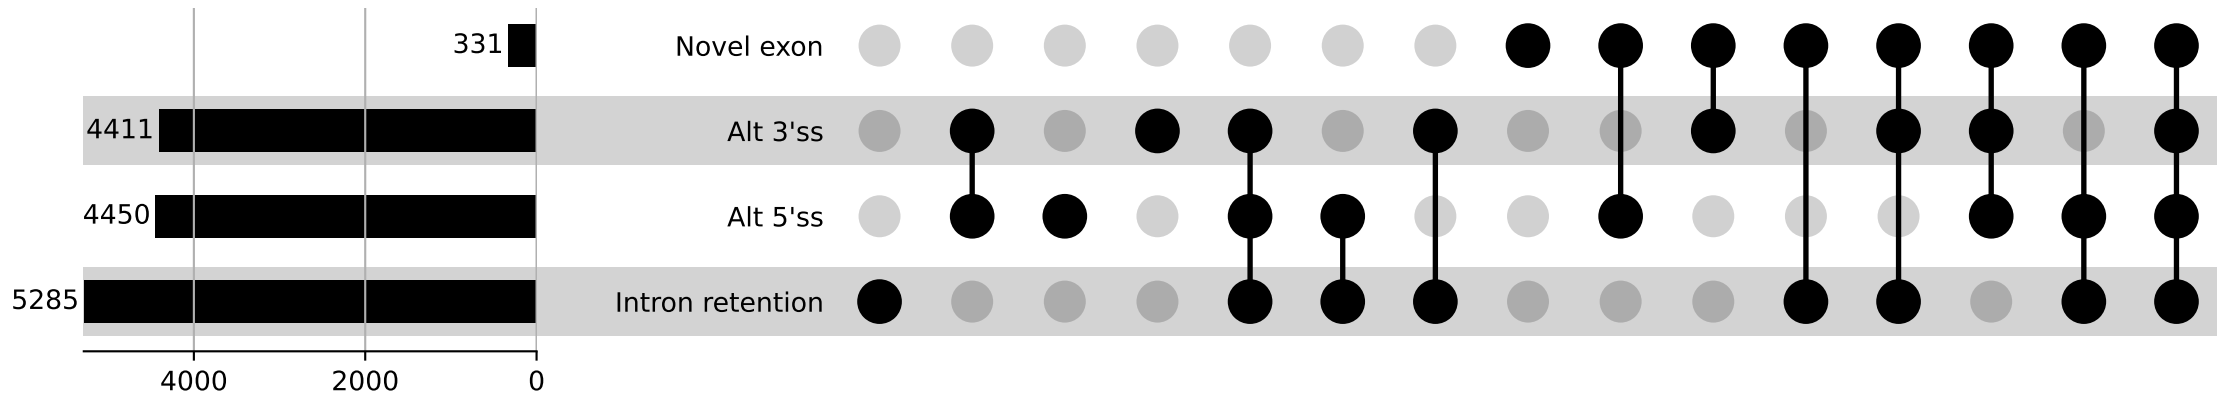

Supplement: Supplemental_code.zip [file Supplemental_Fig_S6C_upset_esp2_andrei_pre.pdf › Supplemental_code/figures/Supplemental_Fig_S6/Supplemental_Fig_S6C_upset_esp2_andrei_pre.pdf]

# All1807: FLAIR ONT novel splice site

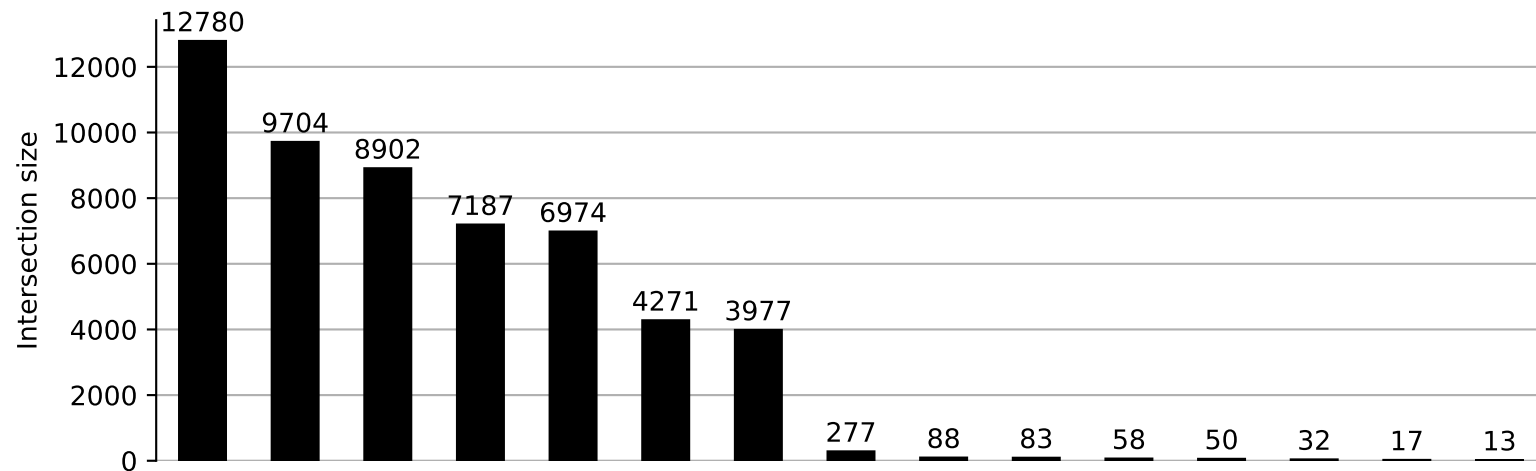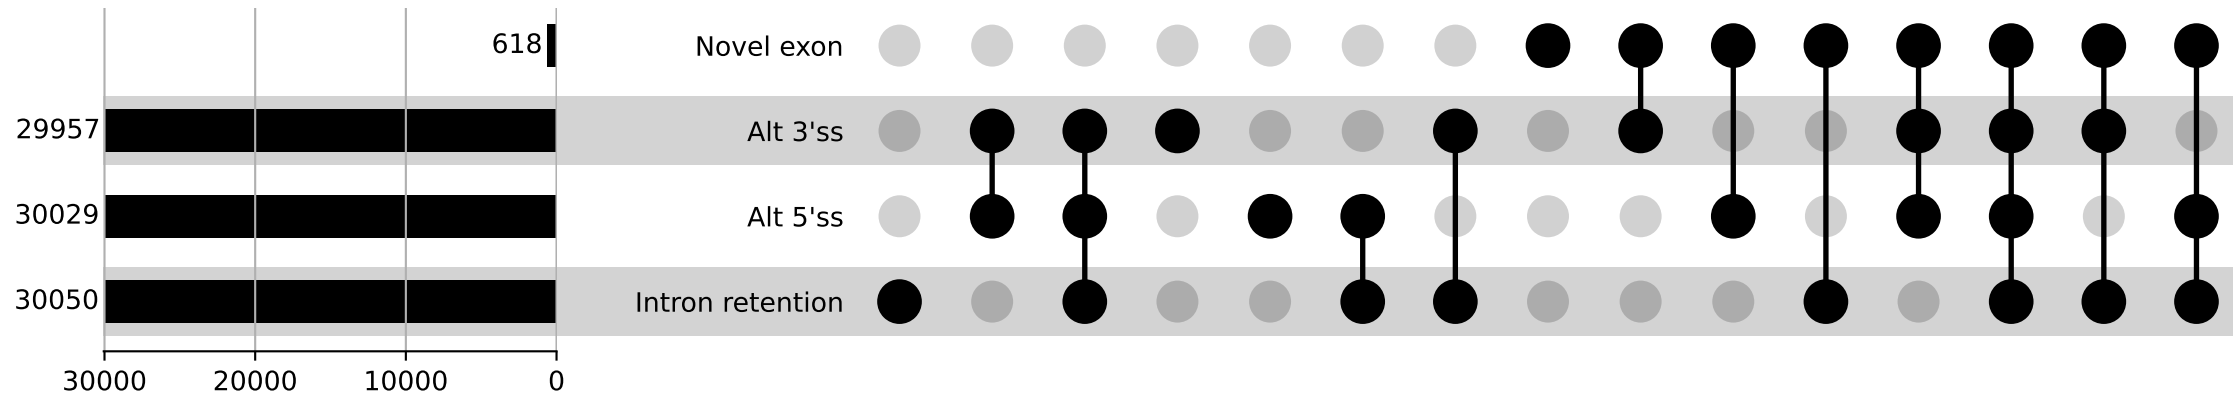

Supplement: Supplemental_code.zip [file Supplemental_Fig_S6C_upset_flair2_andrei_pre.pdf › Supplemental_code/figures/Supplemental_Fig_S6/Supplemental_Fig_S6C_upset_flair2_andrei_pre.pdf]

# GTEx Heart atrial appendage FLAIR ONT novel splice site

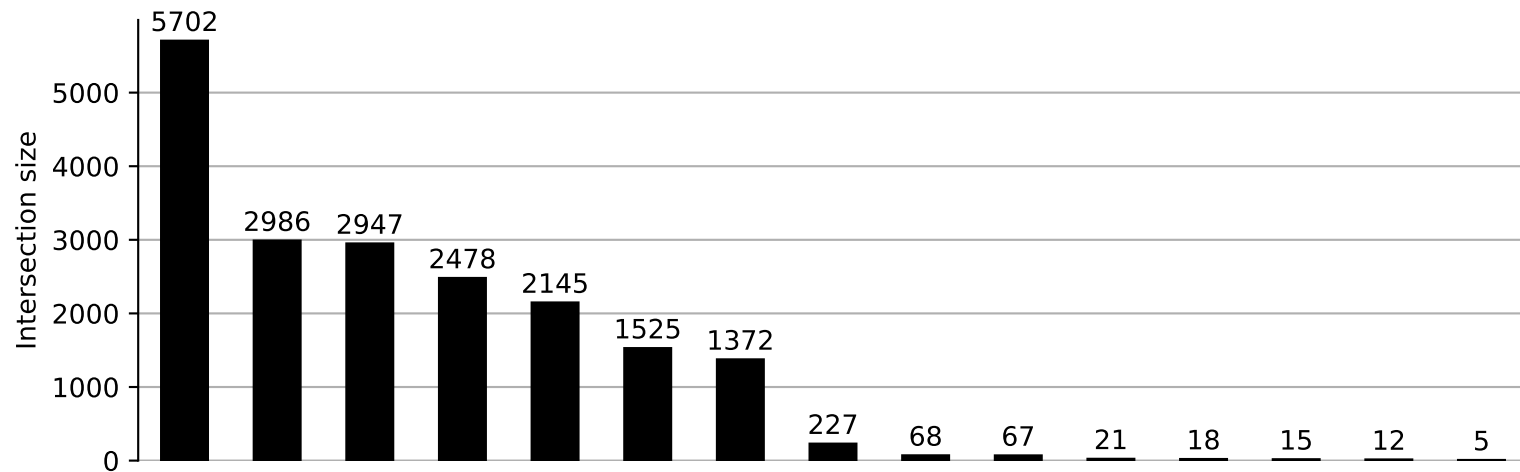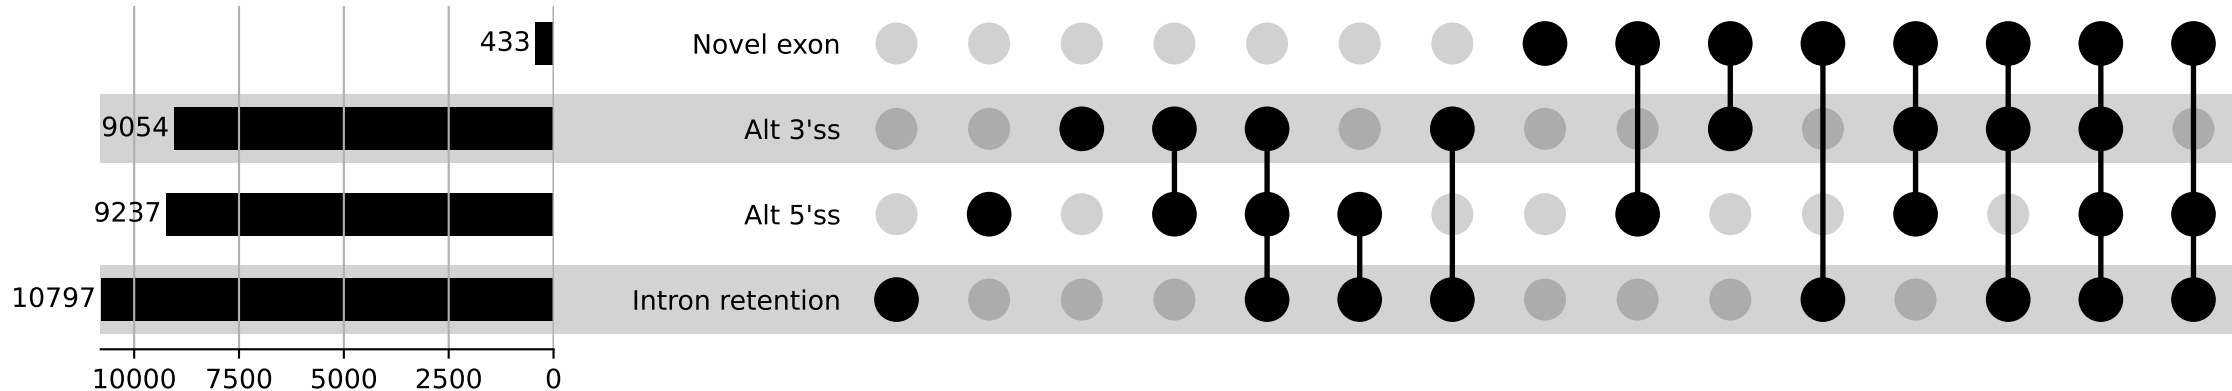

Supplement: Supplemental_code.zip [file Supplemental_Fig_S6C_upset_flair2_gtex_pre.pdf › Supplemental_code/figures/Supplemental_Fig_S6/Supplemental_Fig_S6C_upset_flair2_gtex_pre.pdf]

## All1807: IsoQuant ONT novel splice site

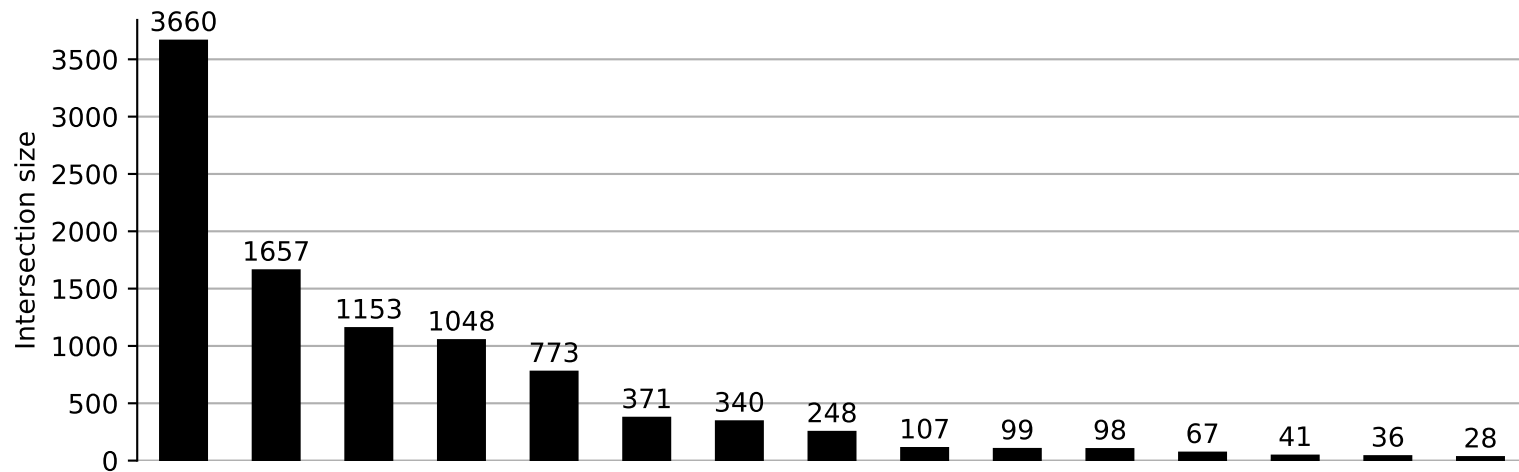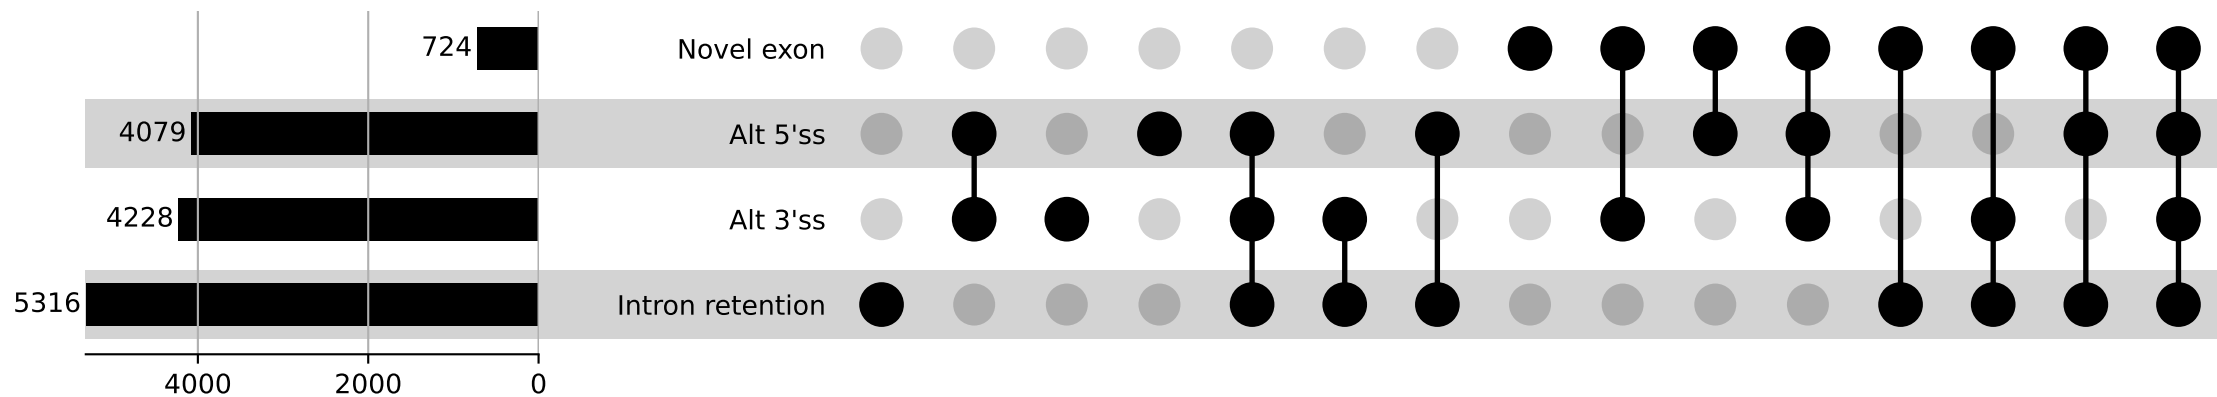

Supplement: Supplemental_code.zip [file Supplemental_Fig_S6C_upset_isq2_andrei_pre.pdf › Supplemental_code/figures/Supplemental_Fig_S6/Supplemental_Fig_S6C_upset_isq2_andrei_pre.pdf]

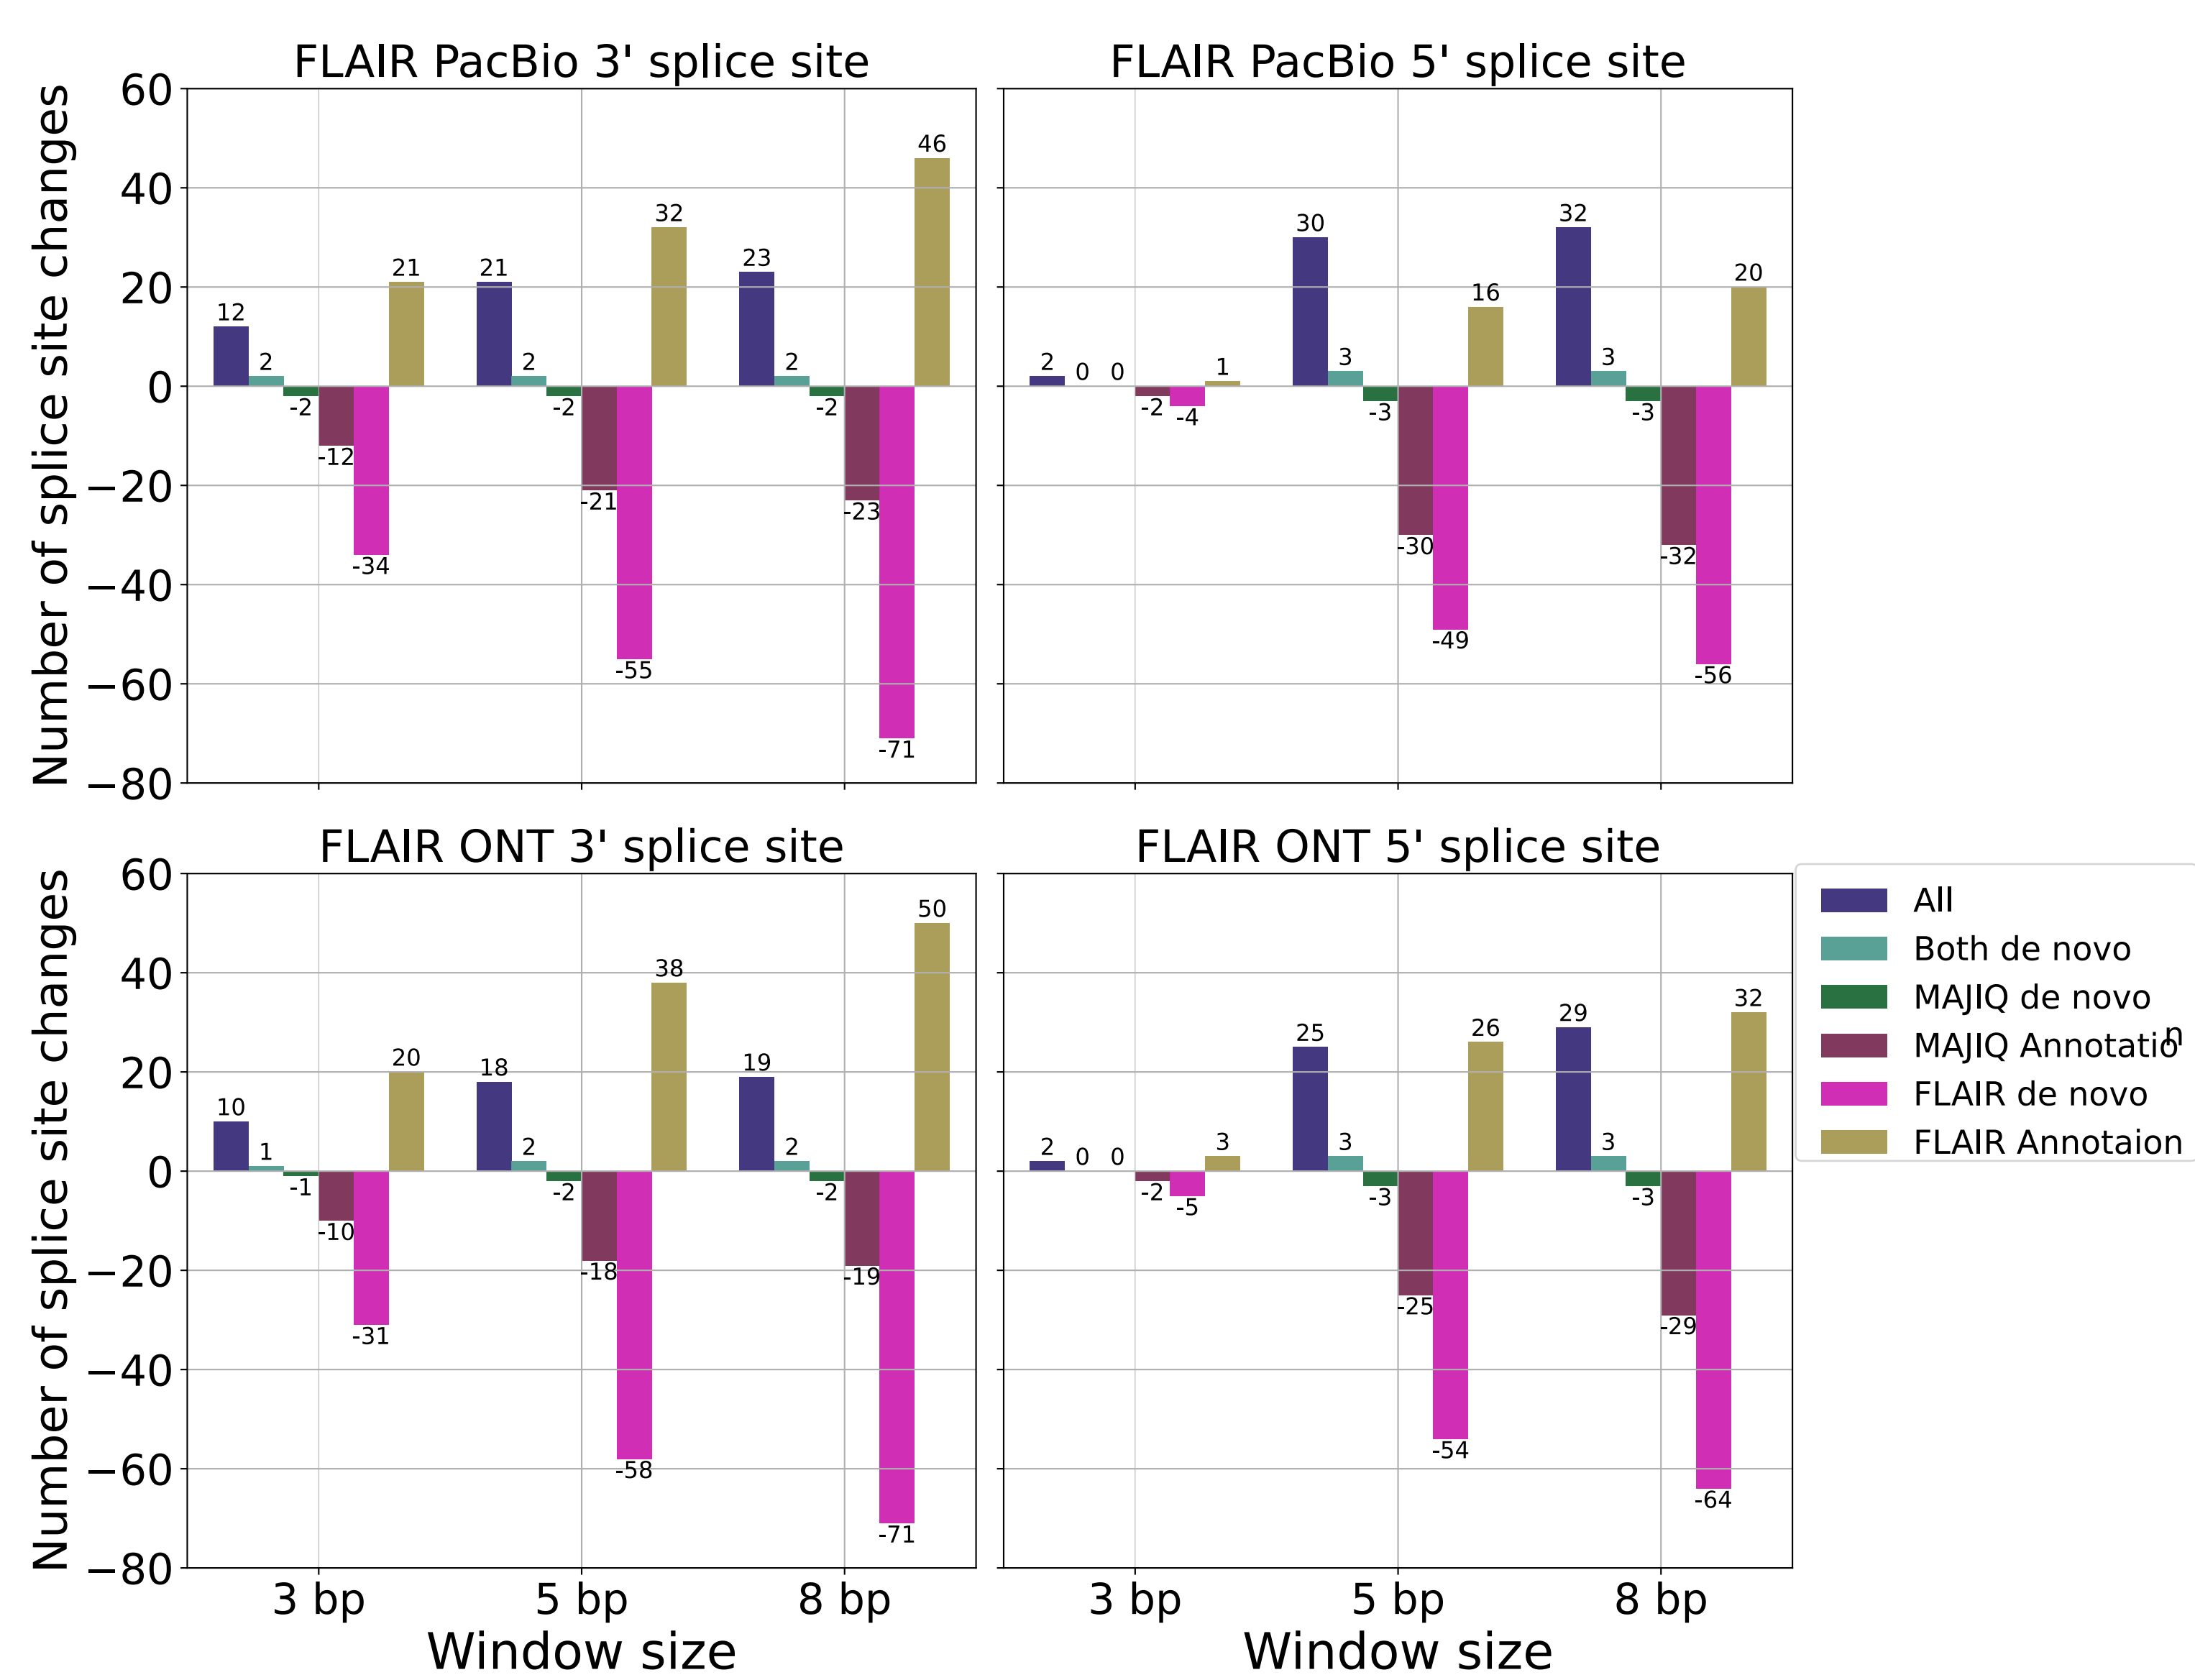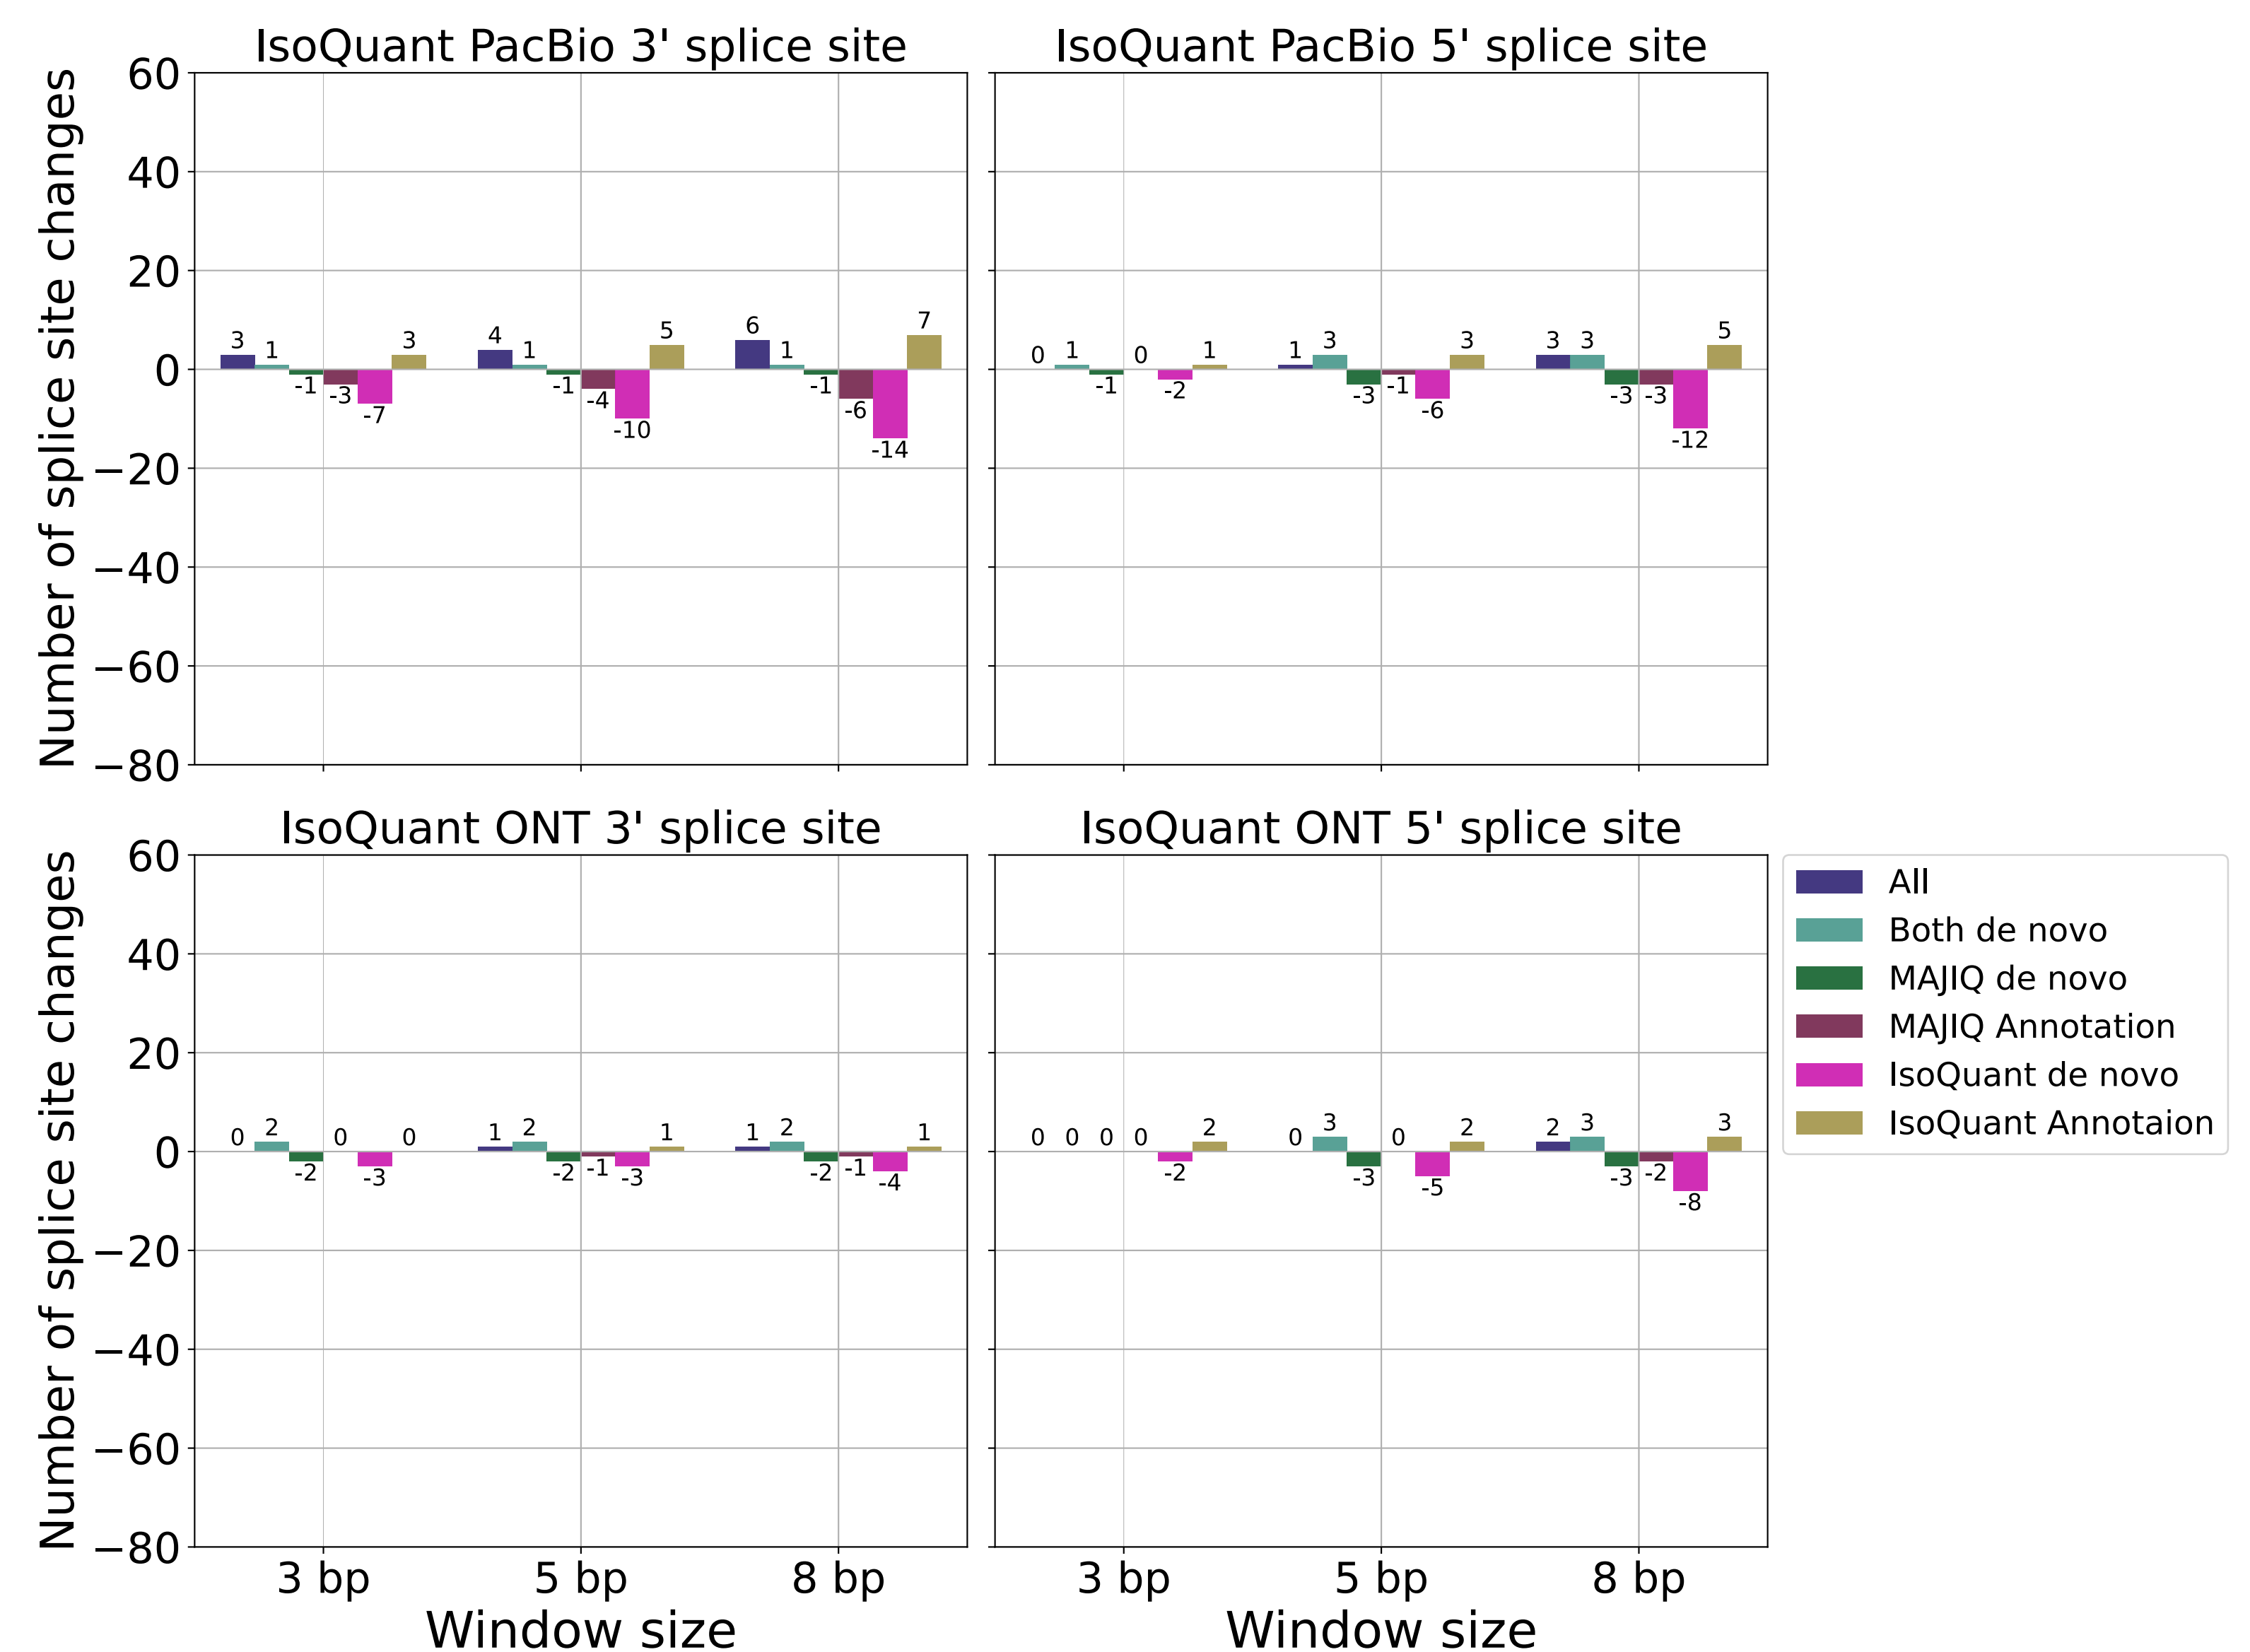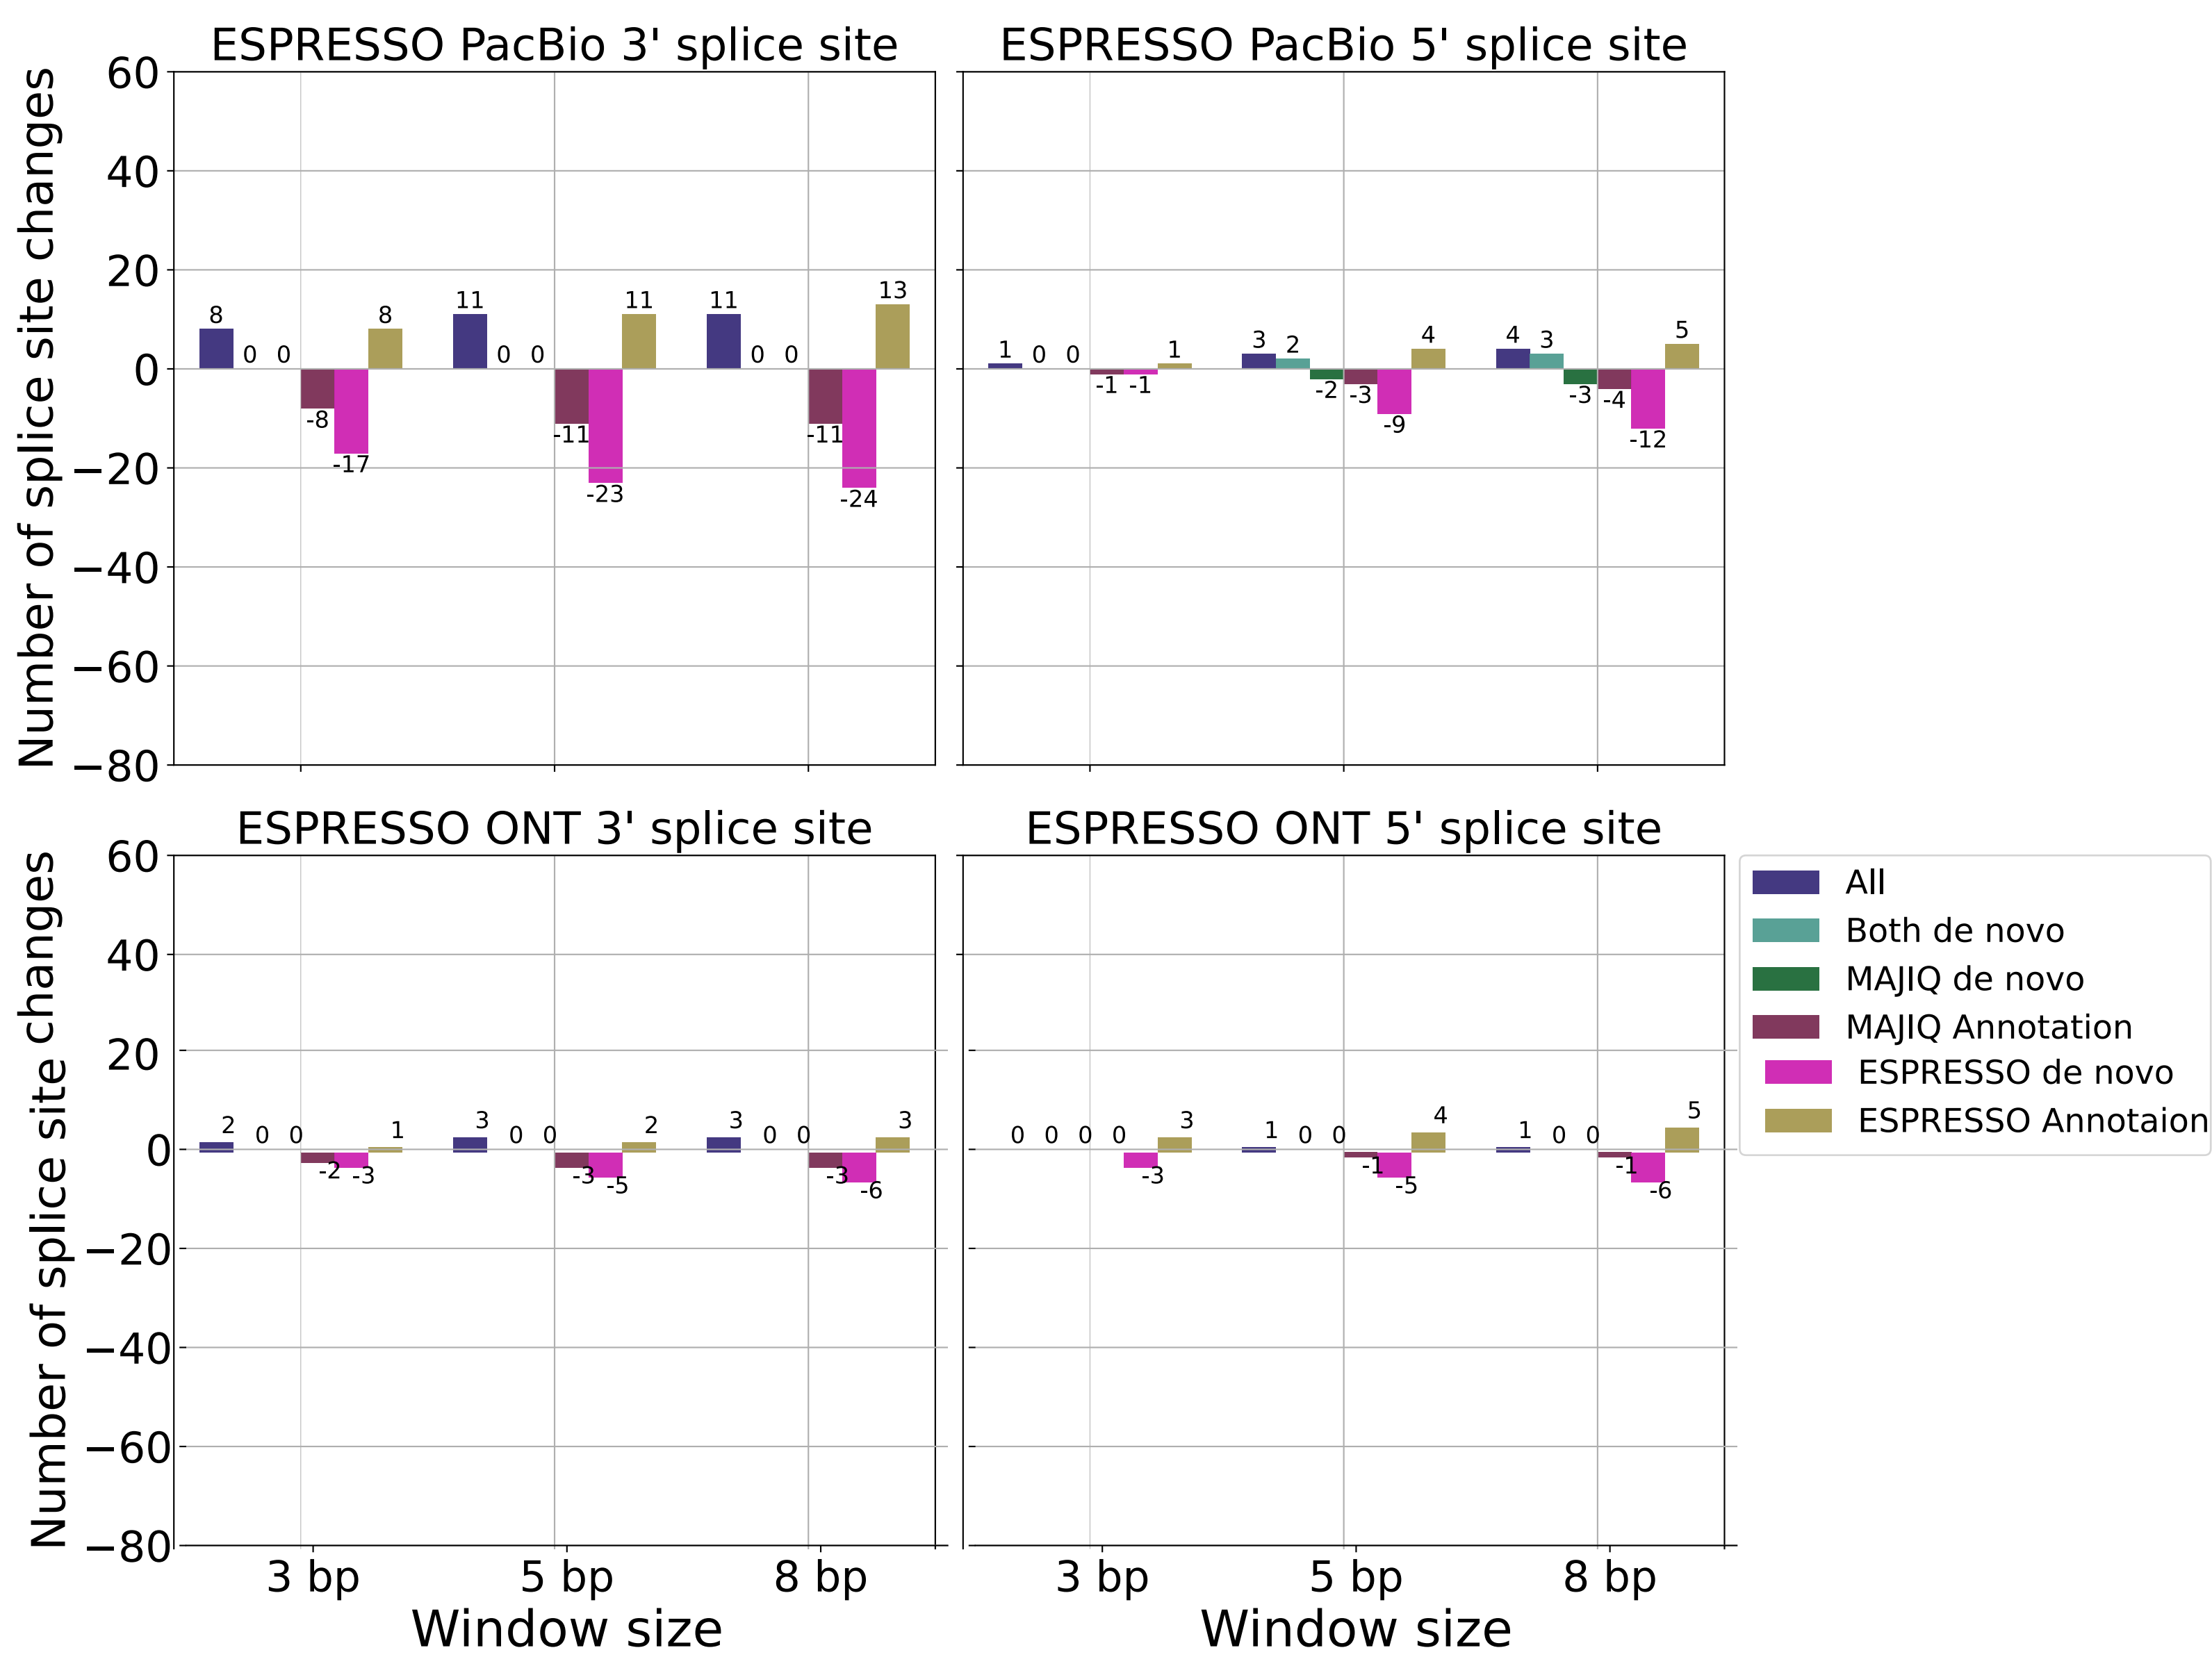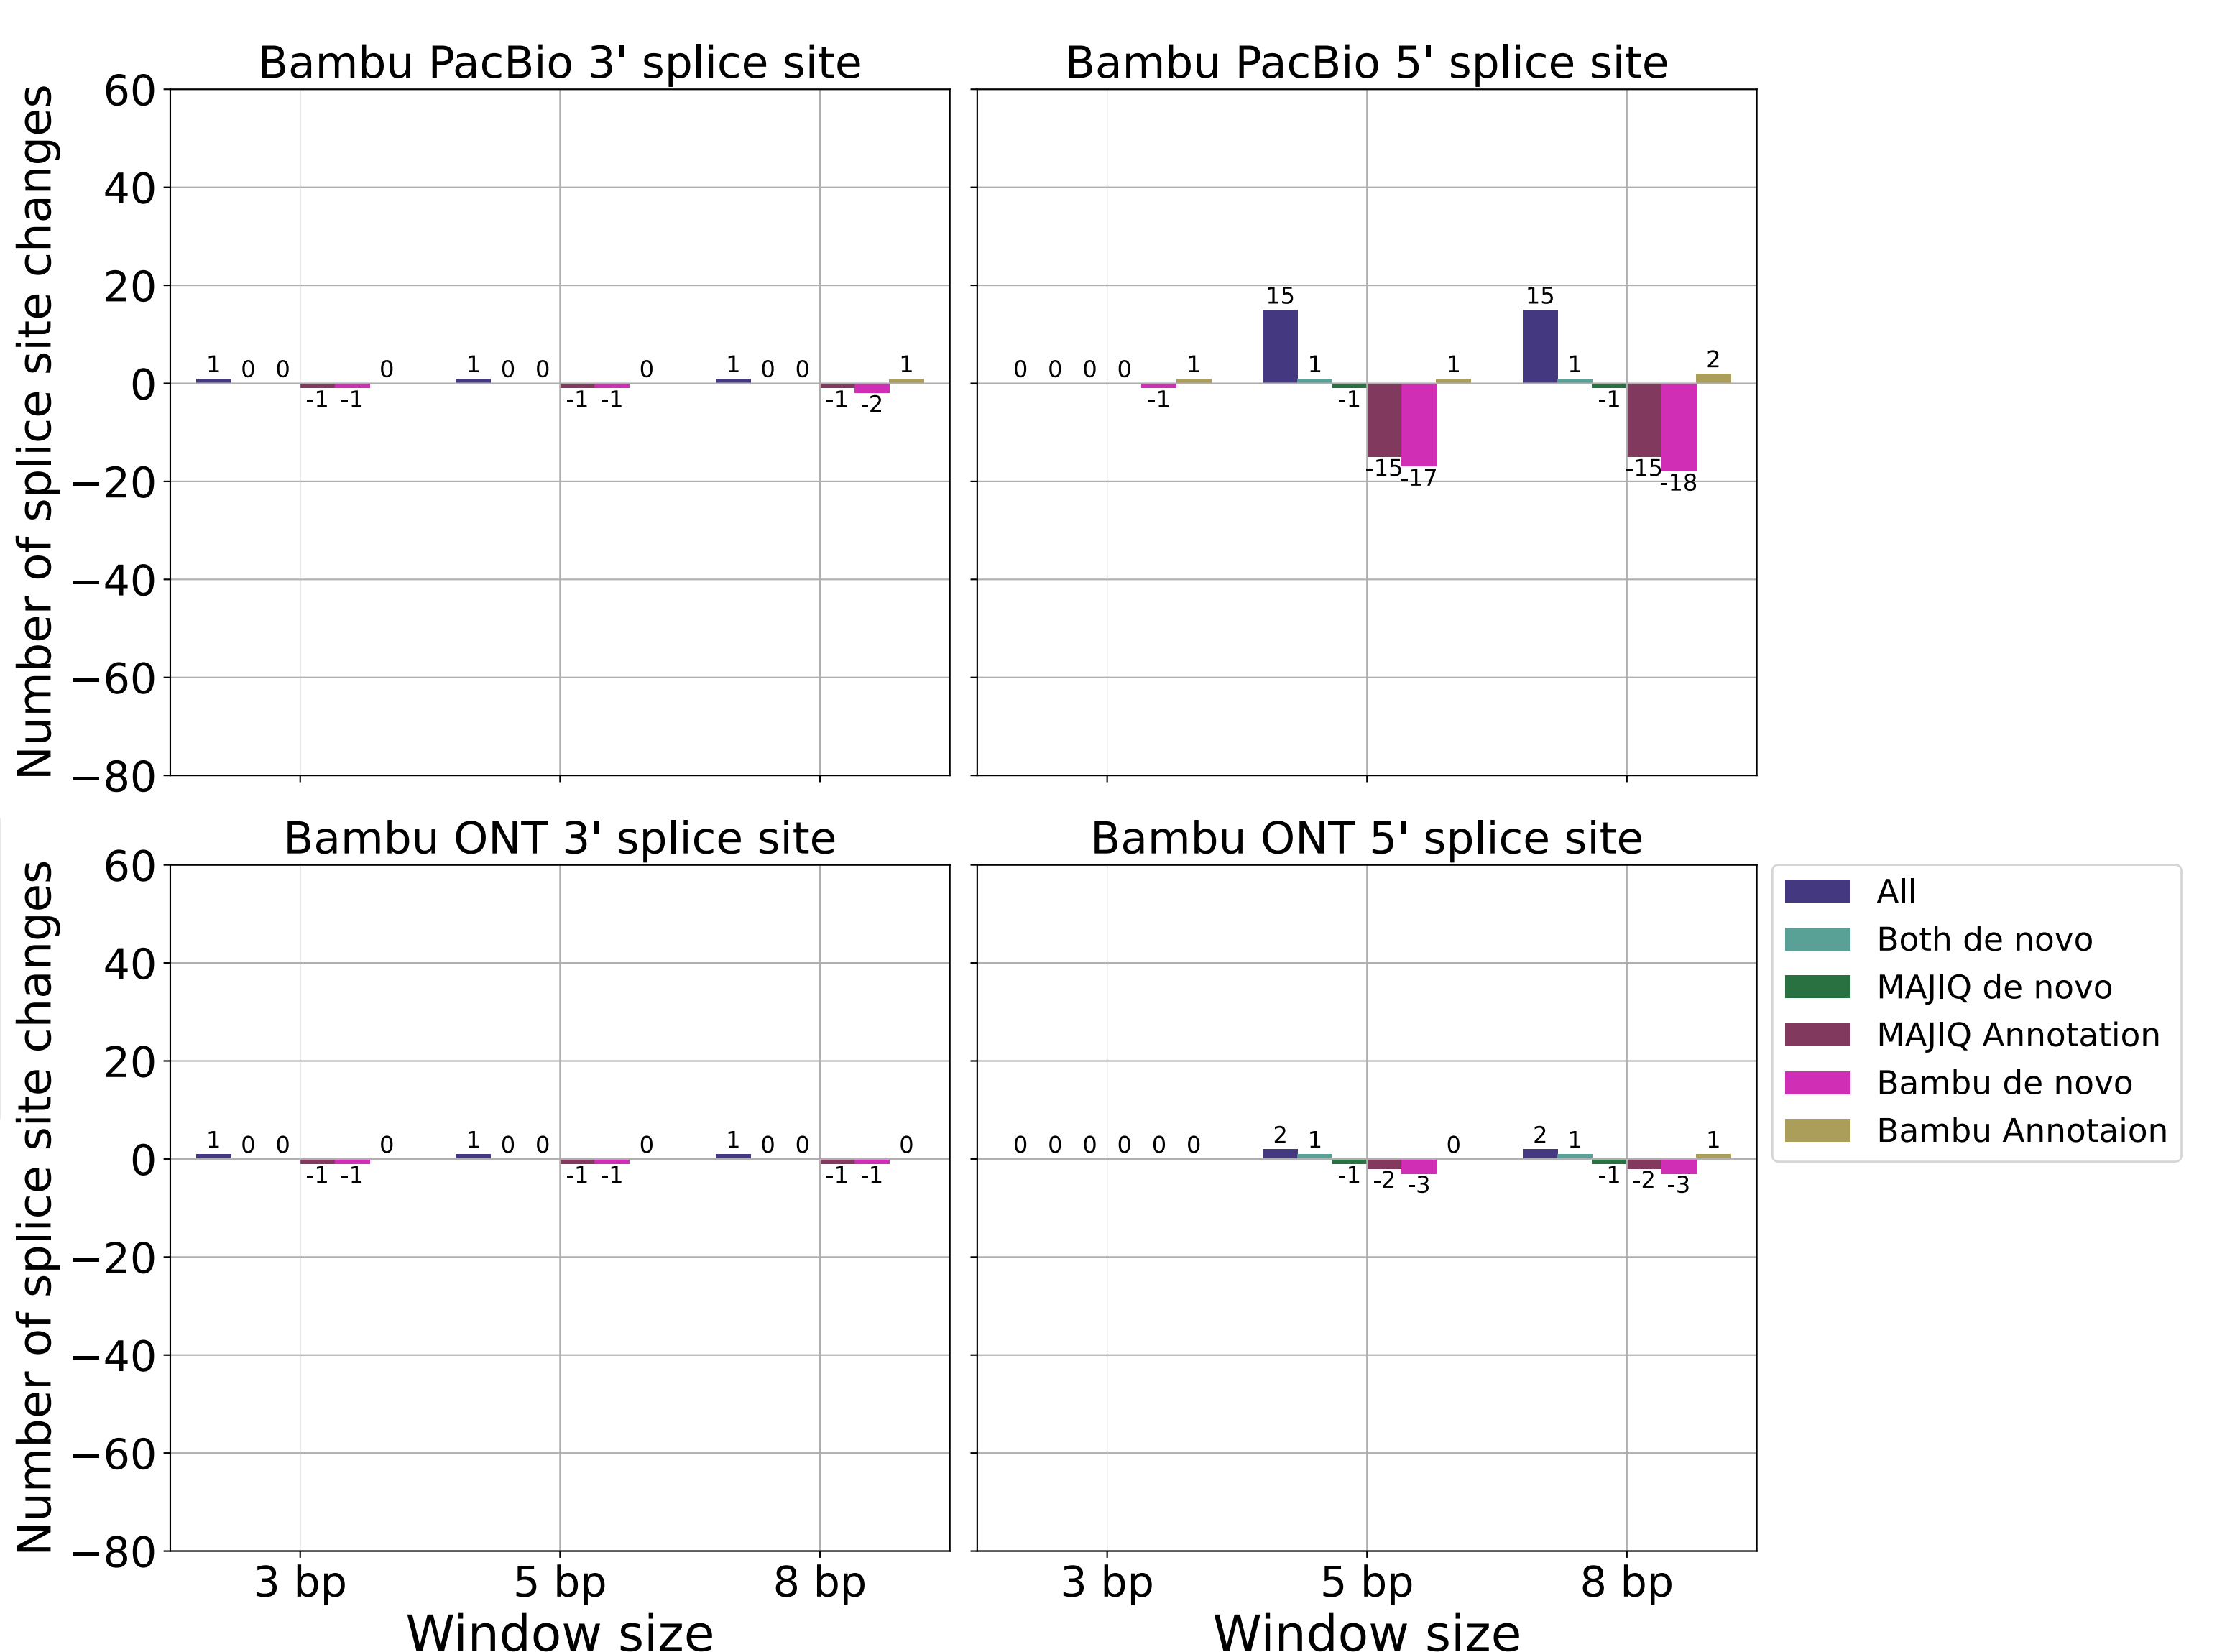

Supplement: Supplemental_code.zip [file Supplemental_Fig_S7.pdf › Supplemental_code/figures/Supplemental_Fig_S7/Supplemental_Fig_S7.pdf]

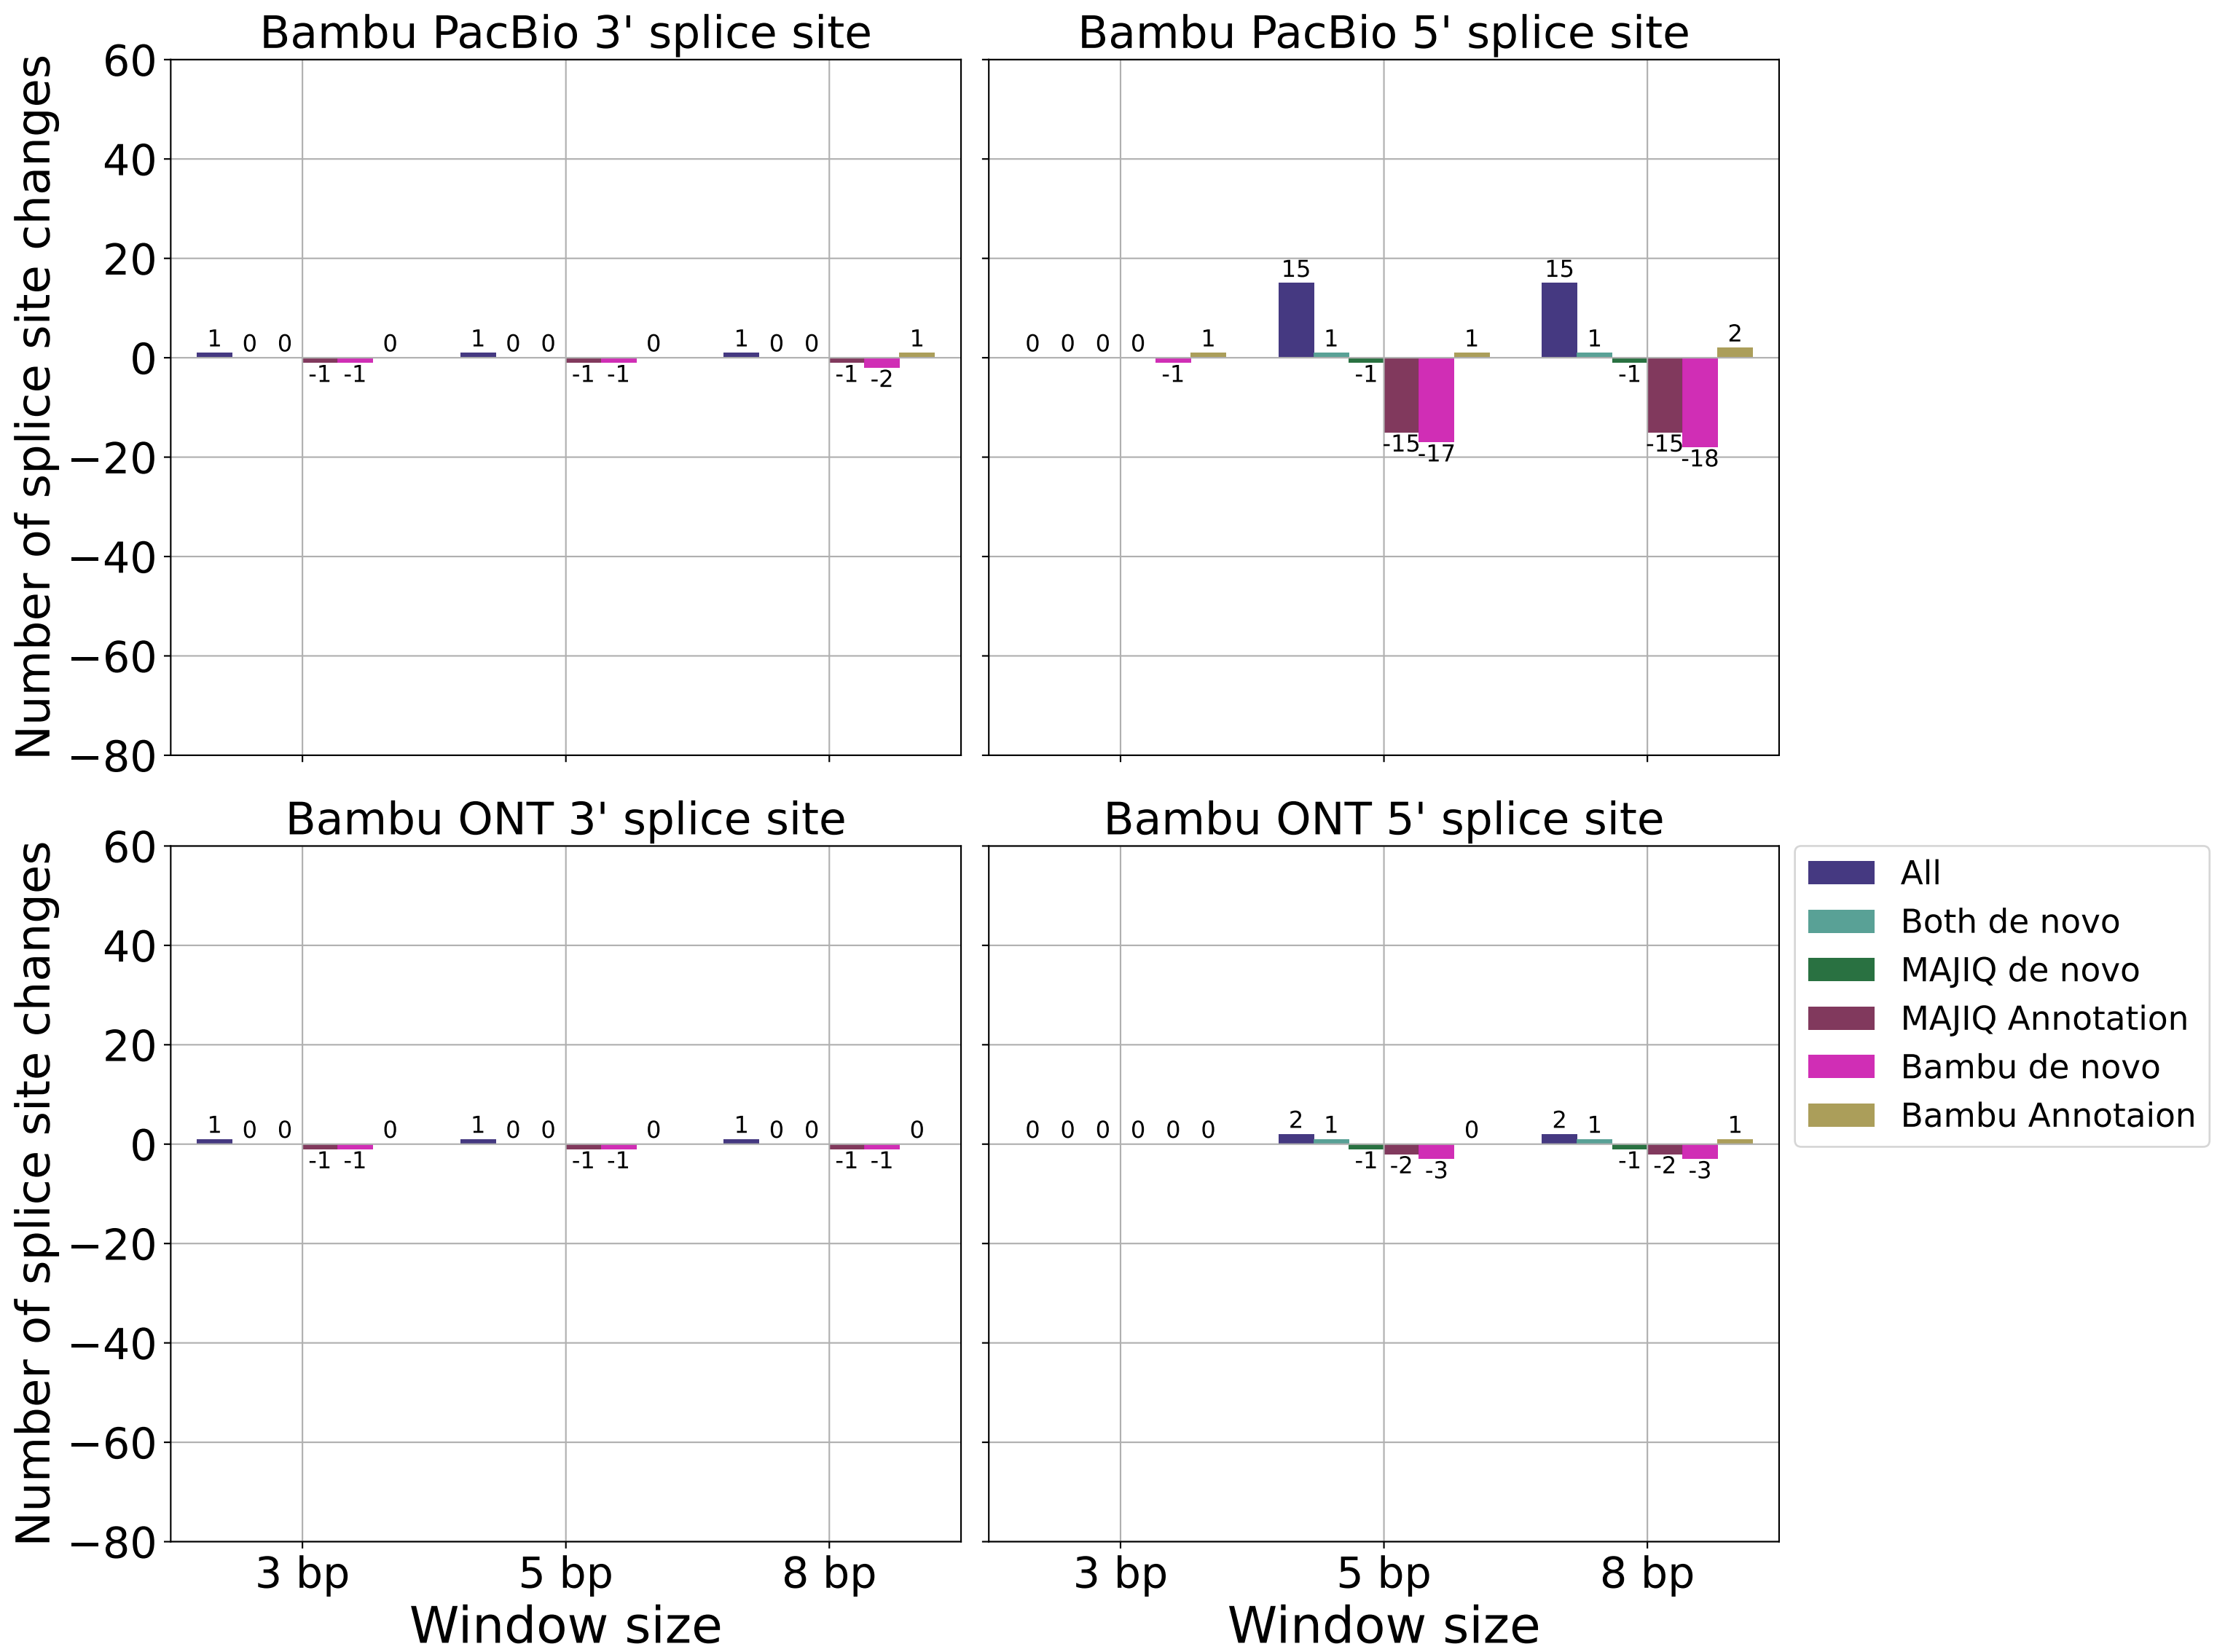

Supplement: Supplemental_code.zip [file Supplemental_Fig_S7bambu_fuzziness.pdf › Supplemental_code/figures/Supplemental_Fig_S7/Supplemental_Fig_S7bambu_fuzziness.pdf]

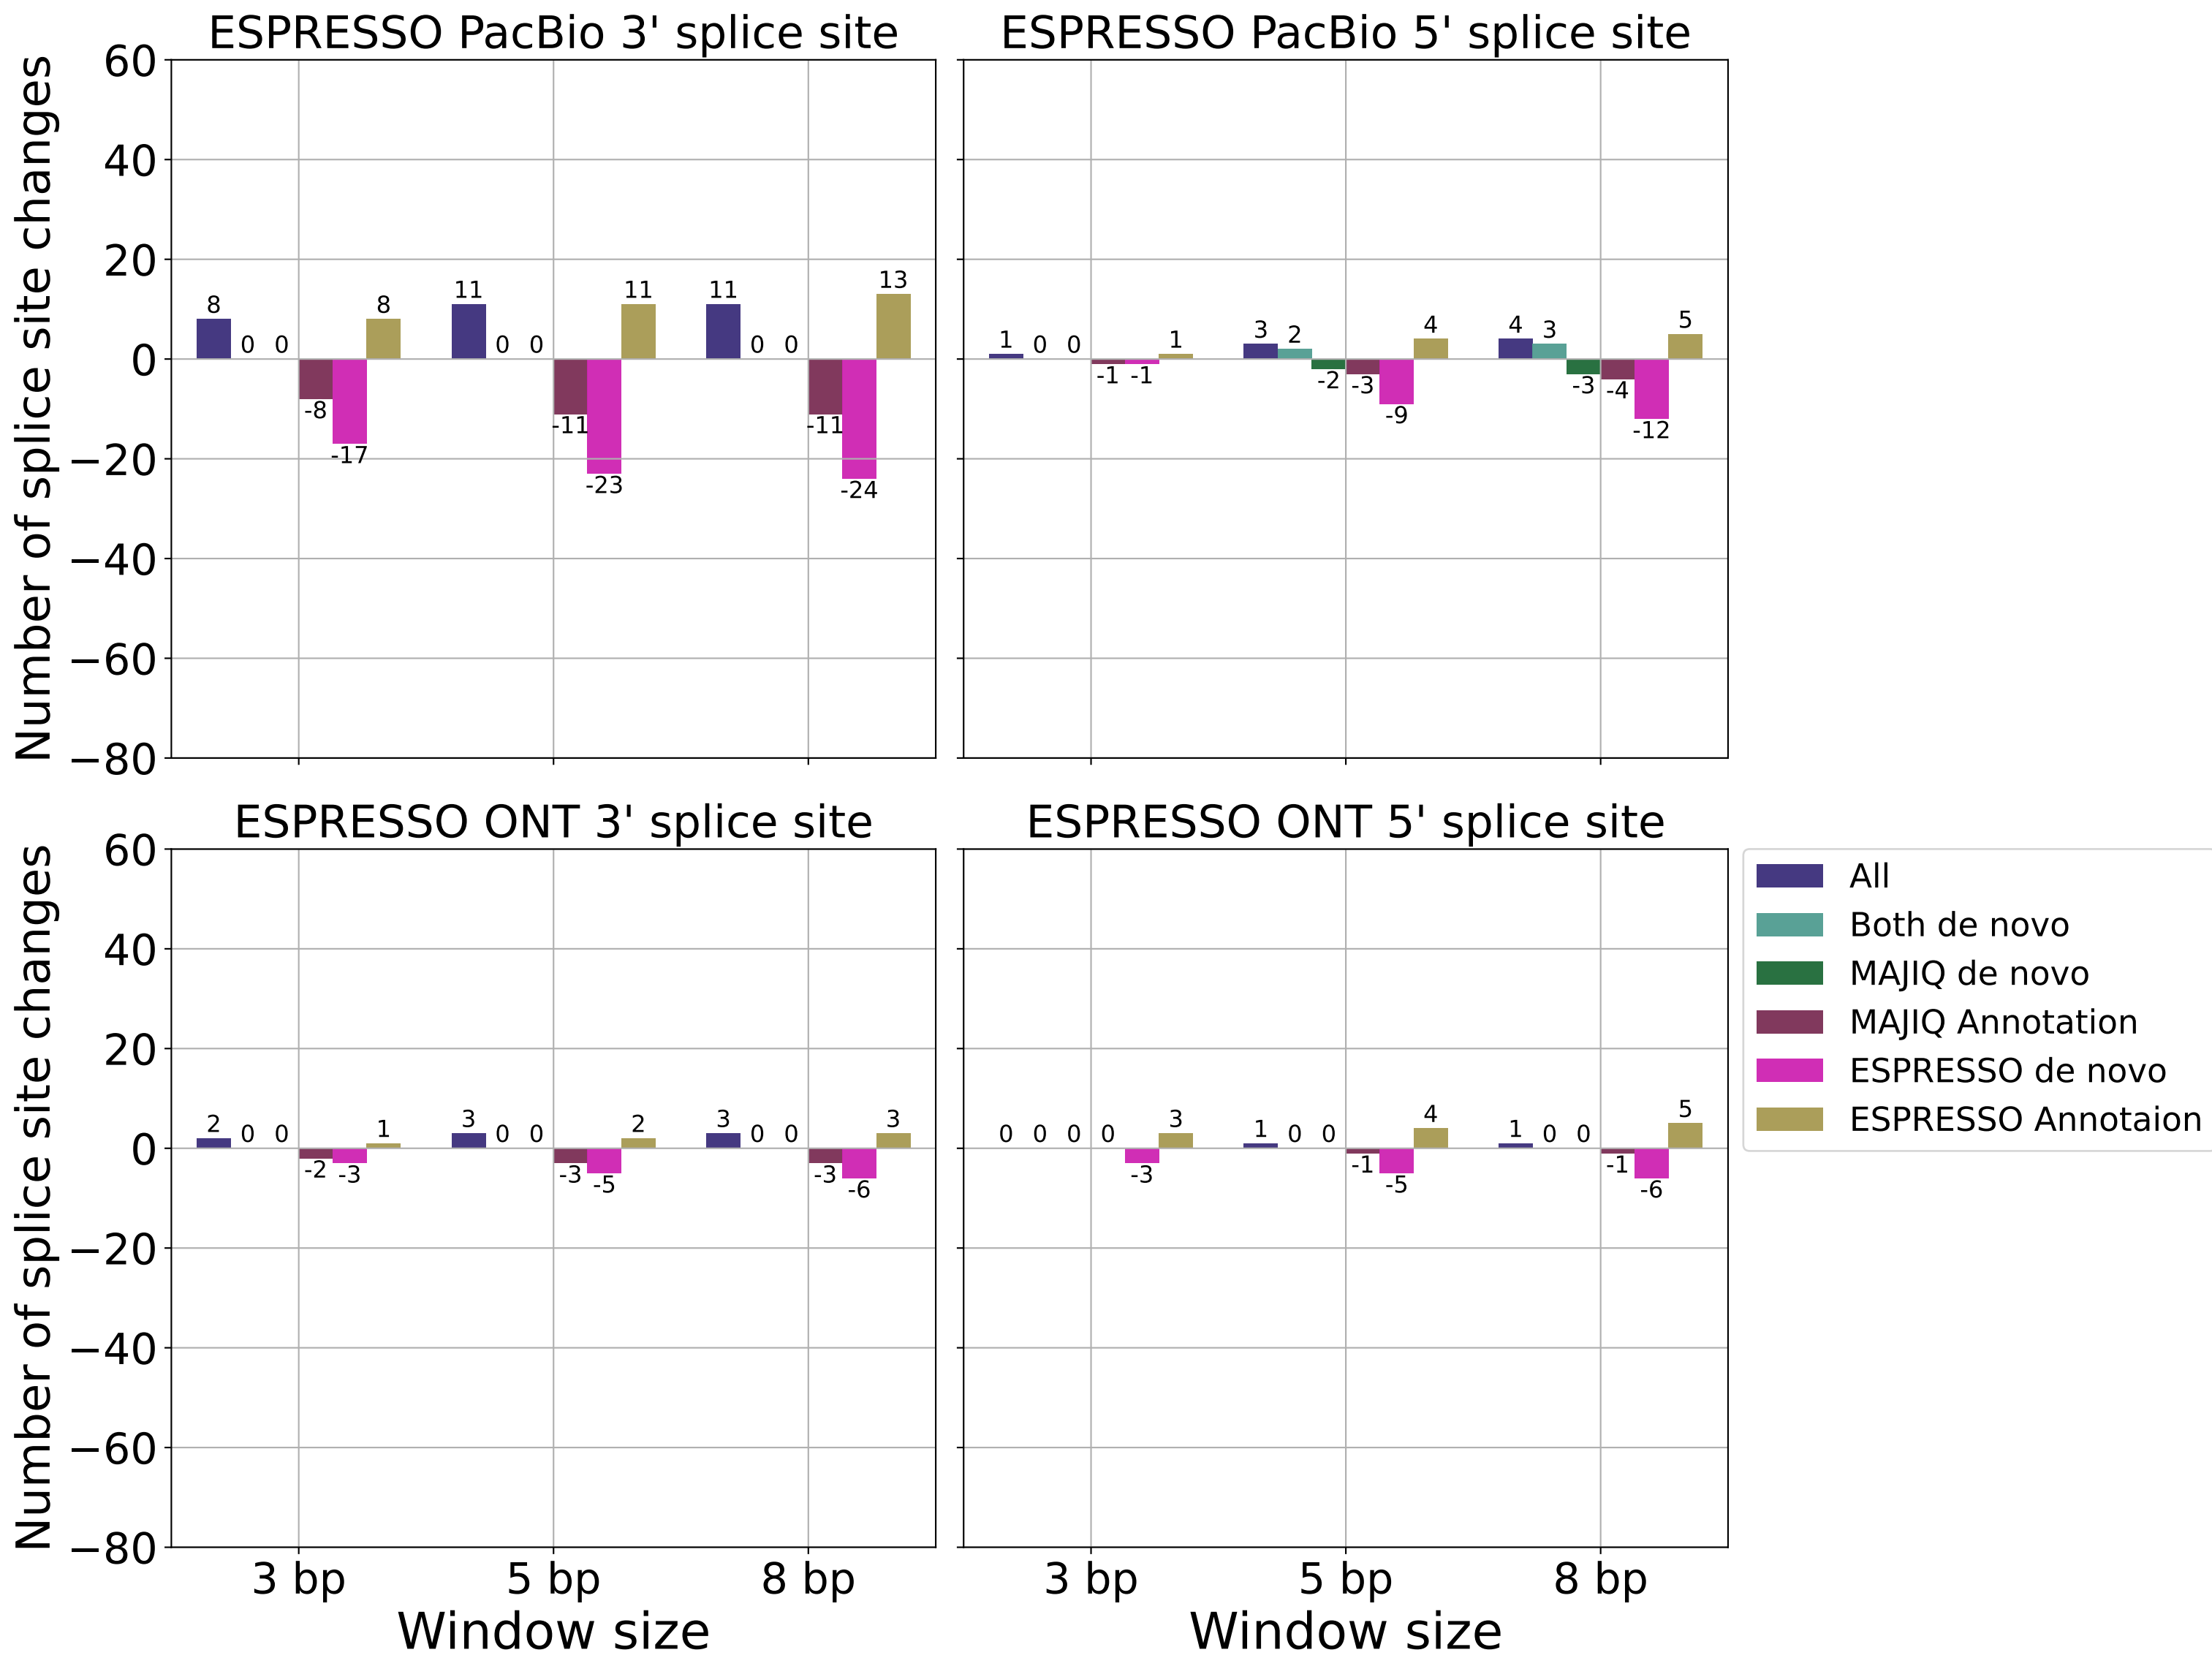

Supplement: Supplemental_code.zip [file Supplemental_Fig_S7esp_fuzziness_new.pdf › Supplemental_code/figures/Supplemental_Fig_S7/Supplemental_Fig_S7esp_fuzziness_new.pdf]

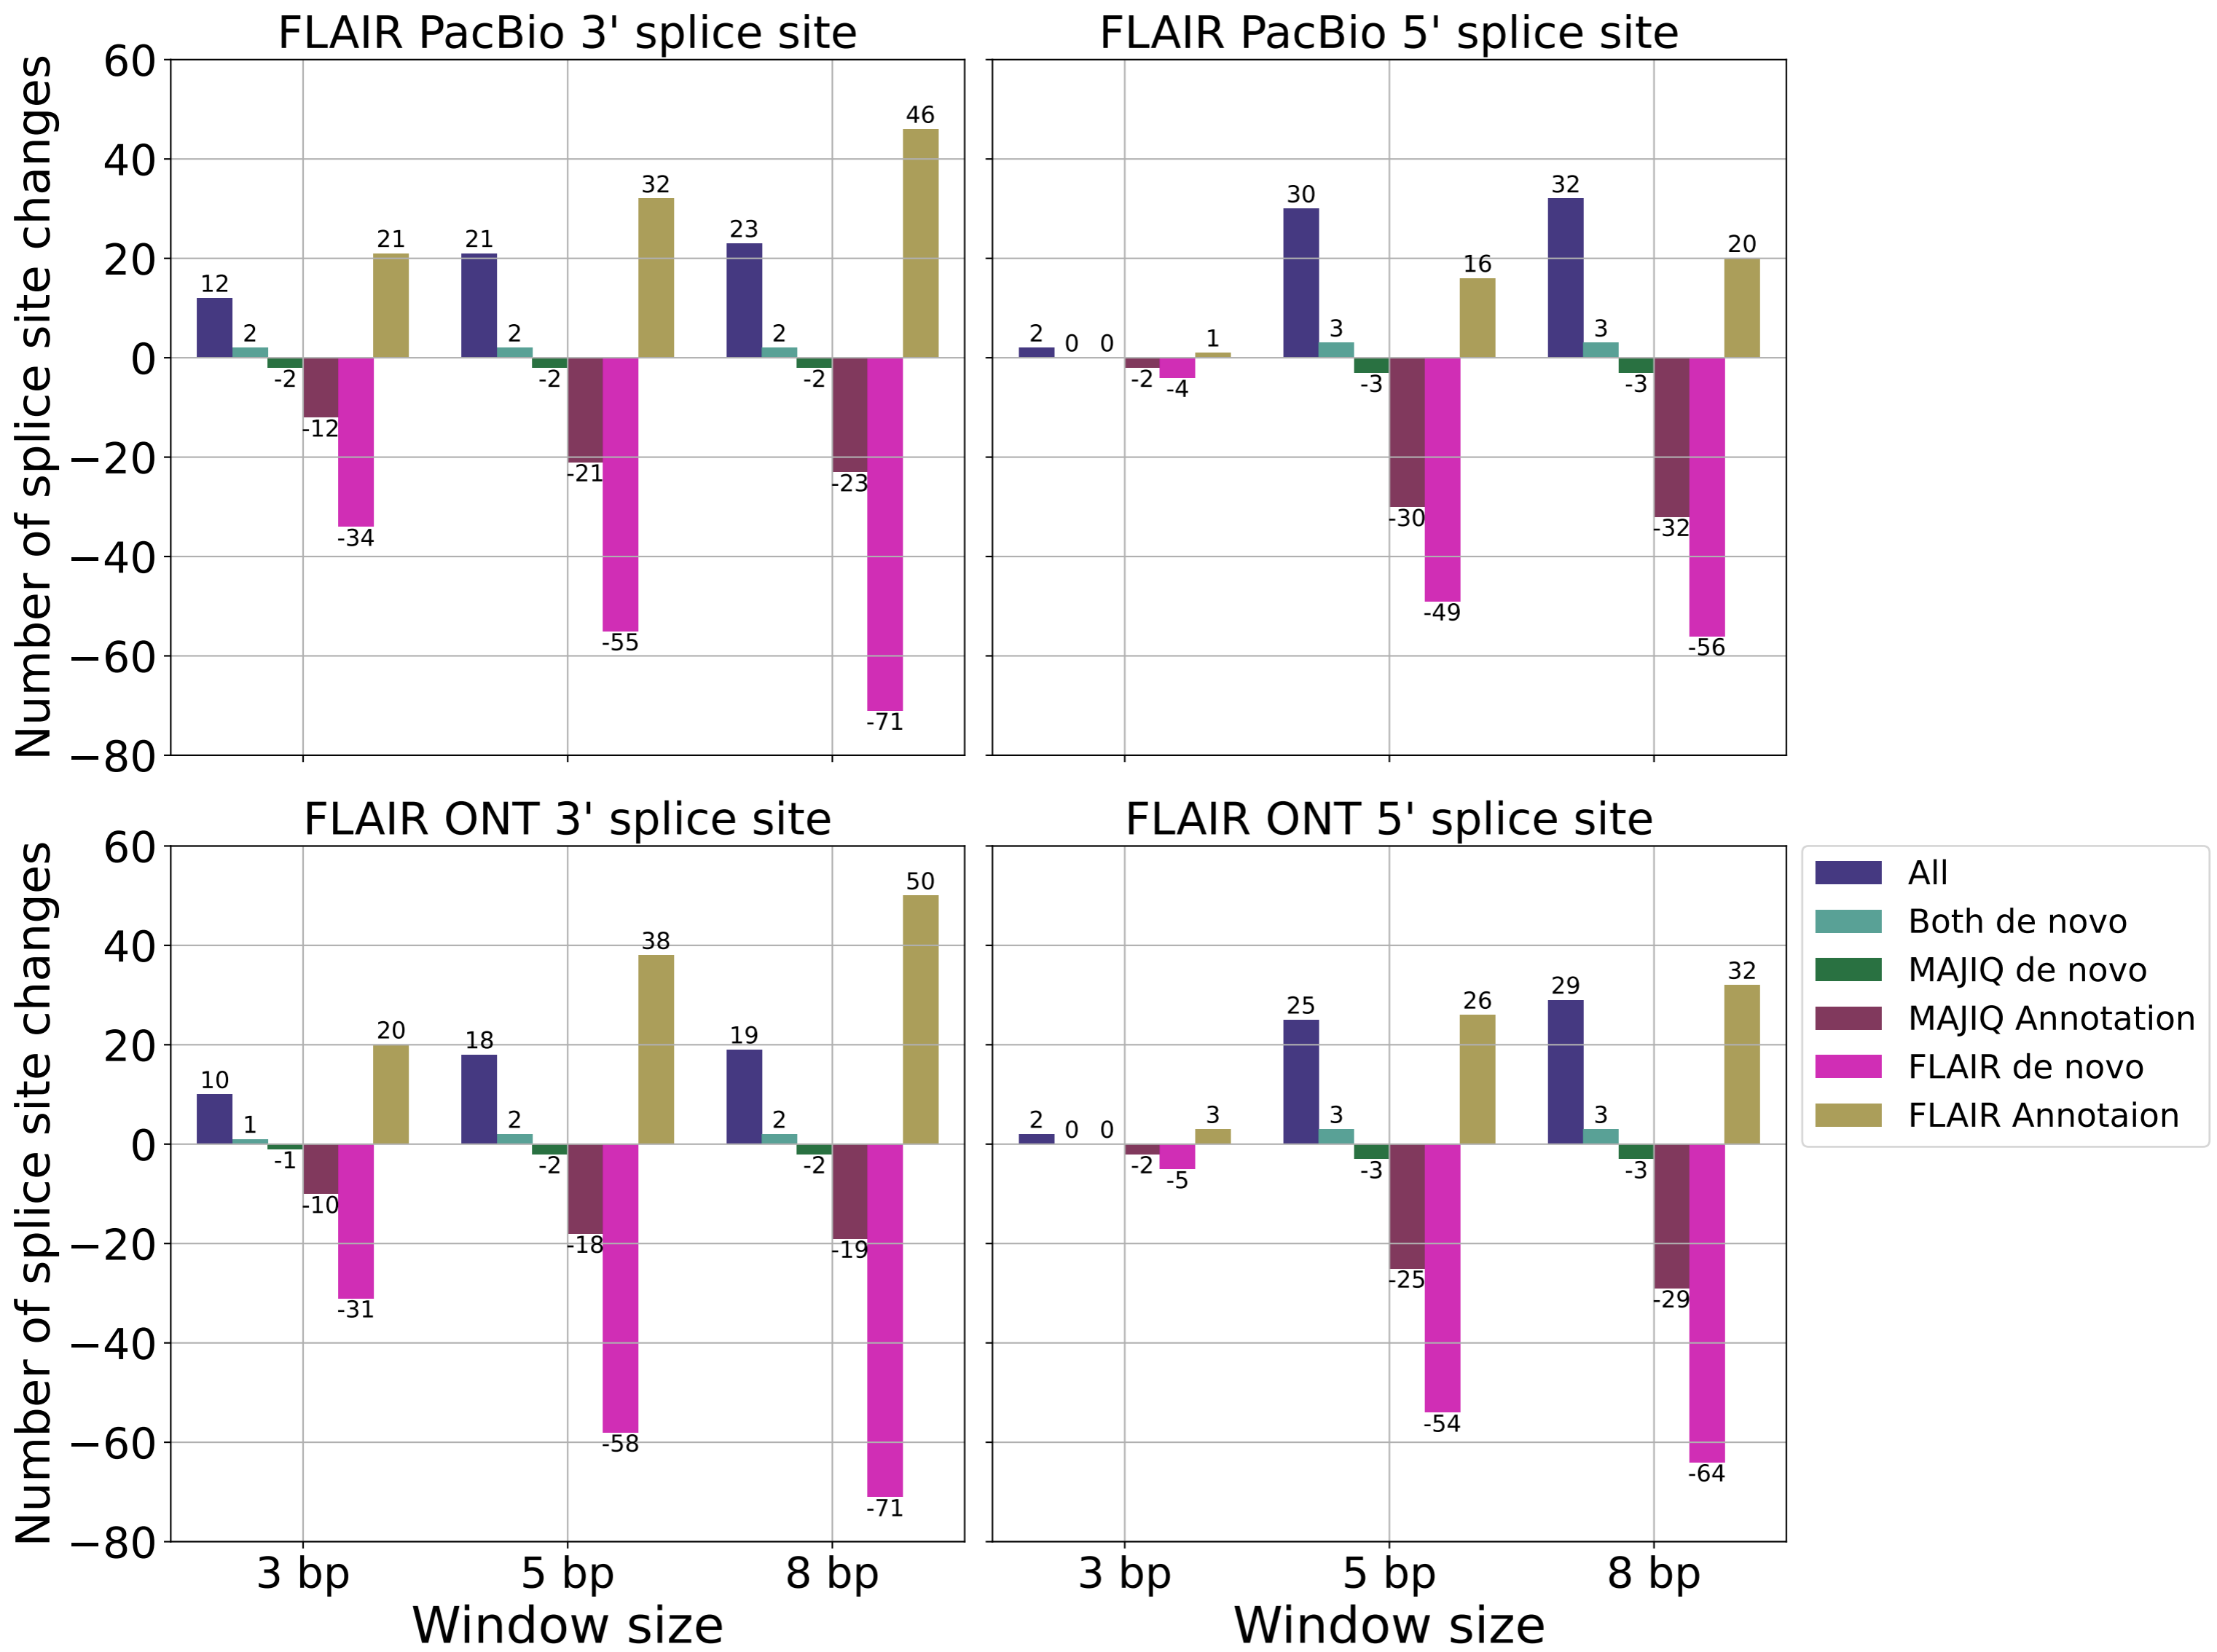

Supplement: Supplemental_code.zip [file Supplemental_Fig_S7flair_fuzziness_new.pdf › Supplemental_code/figures/Supplemental_Fig_S7/Supplemental_Fig_S7flair_fuzziness_new.pdf]

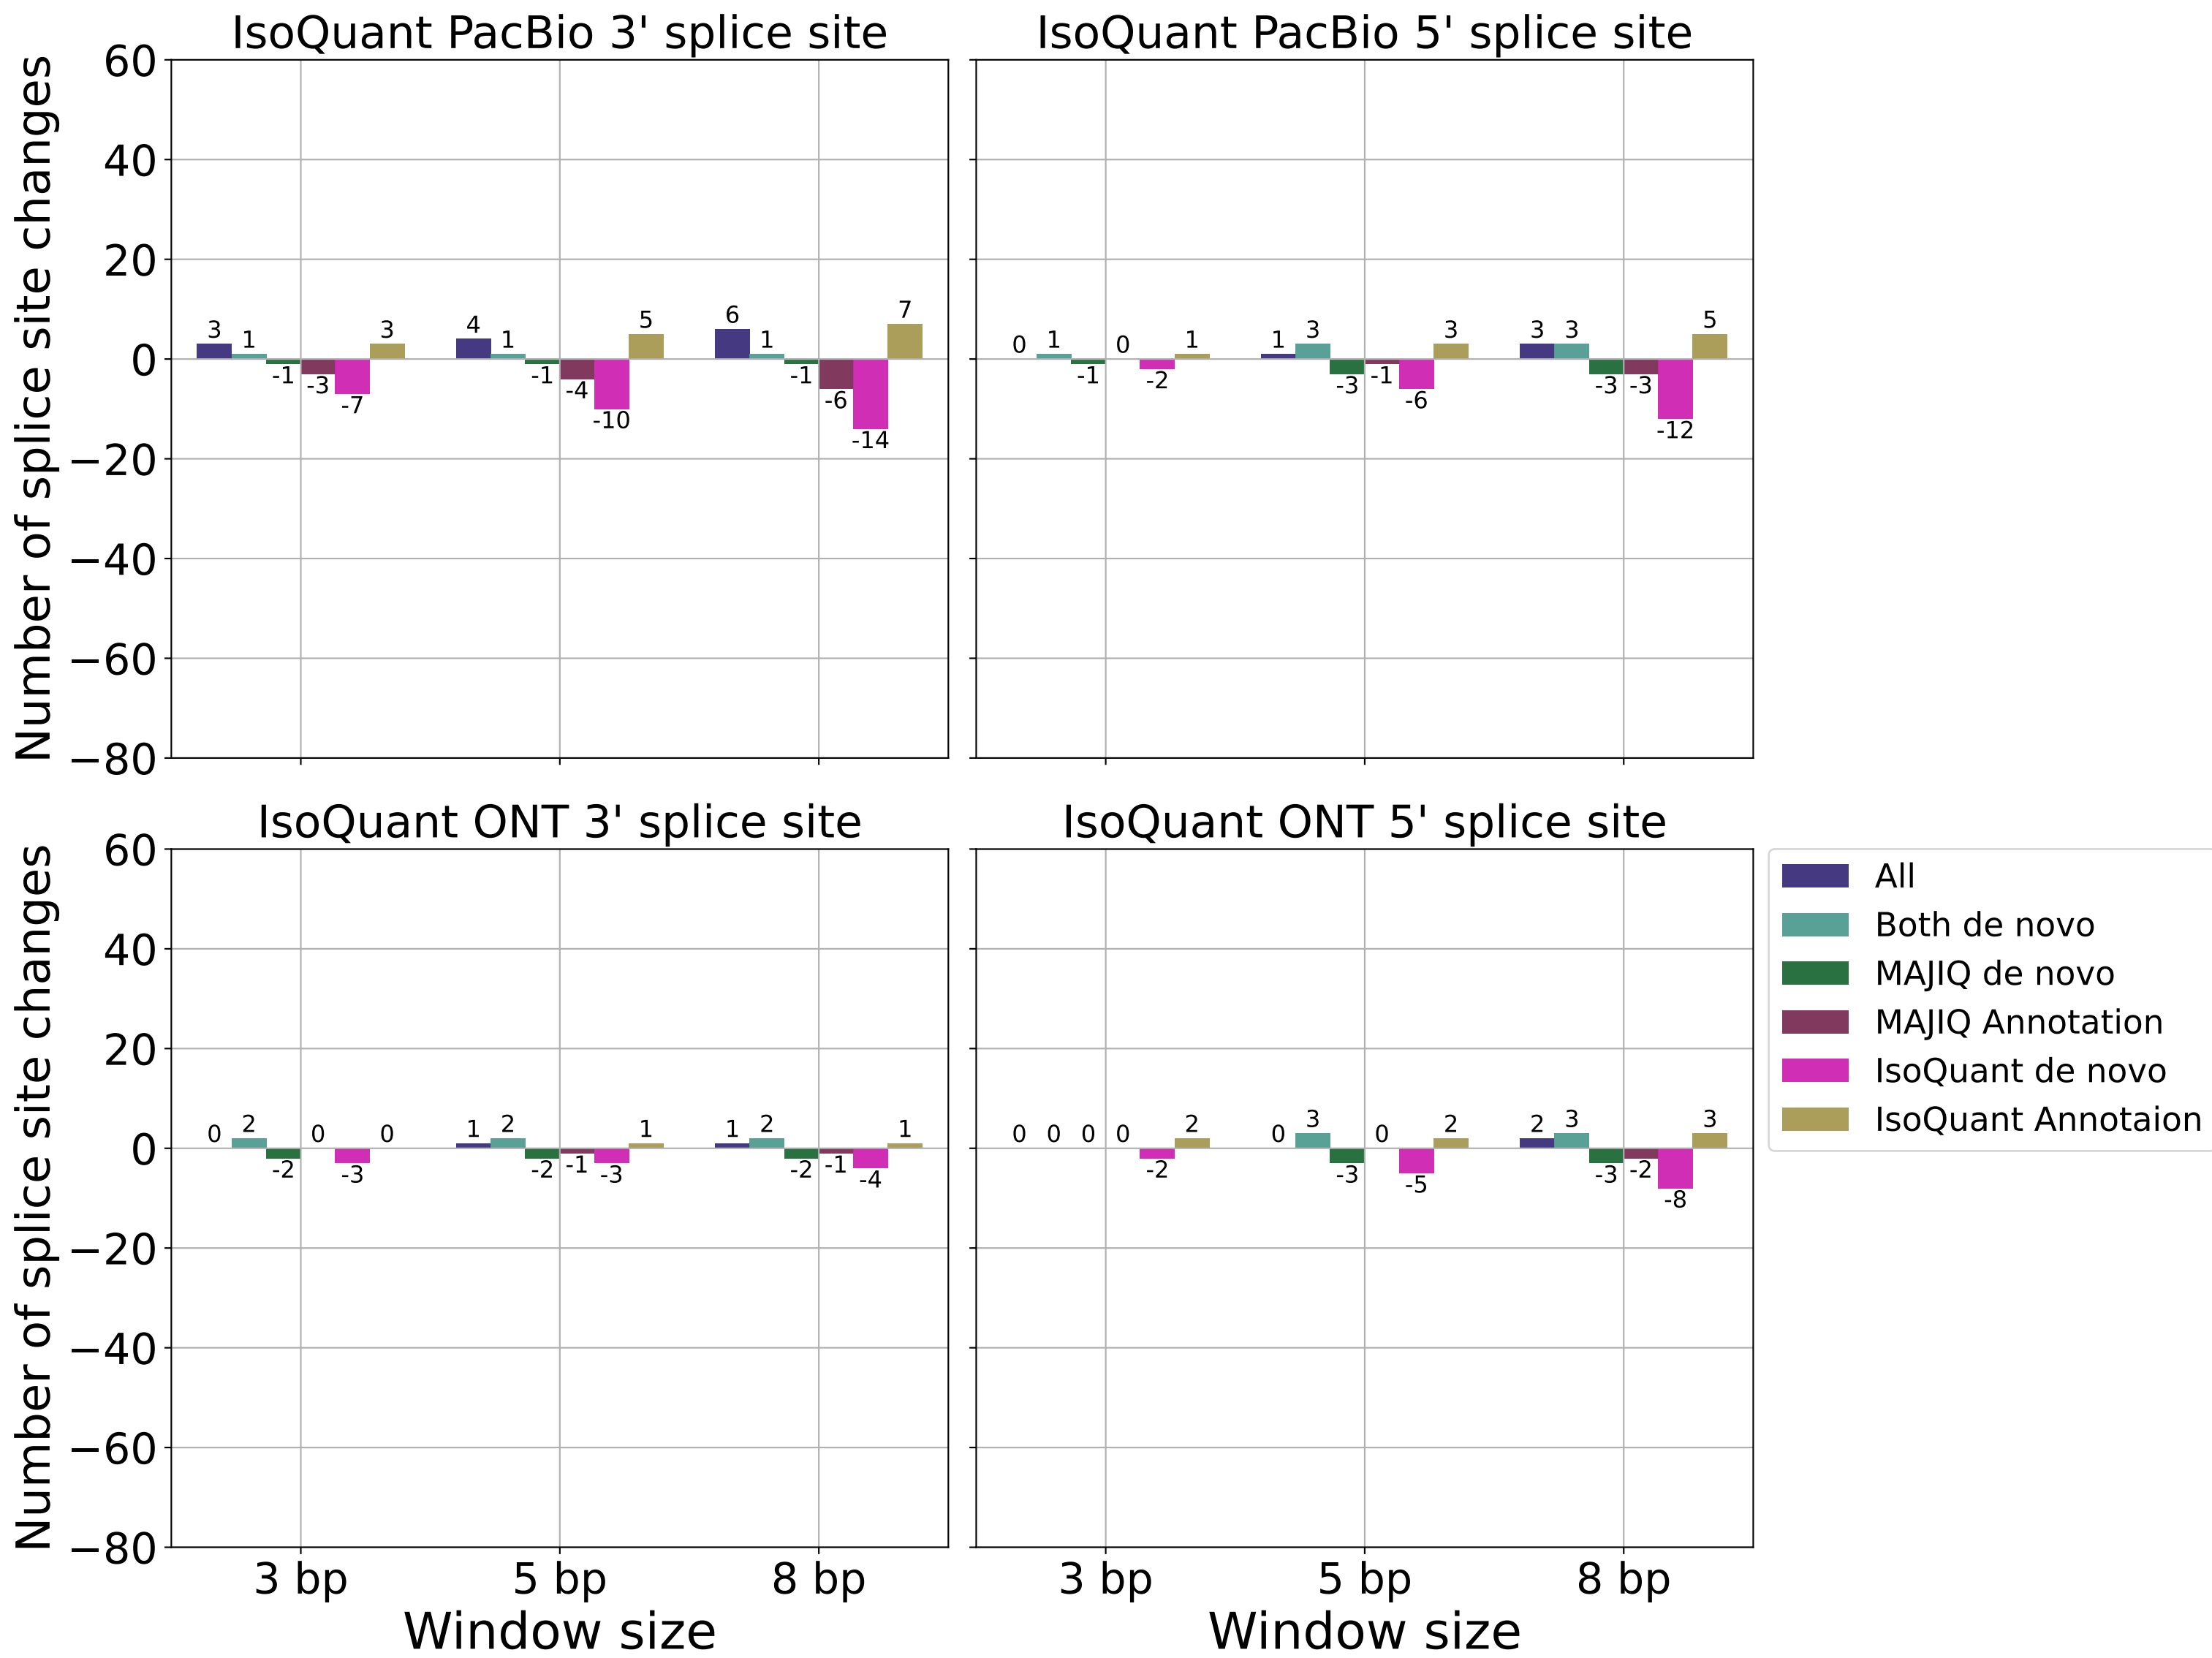

Supplement: Supplemental_code.zip [file Supplemental_Fig_S7isq_fuzziness_new.pdf › Supplemental_code/figures/Supplemental_Fig_S7/Supplemental_Fig_S7isq_fuzziness_new.pdf]

A

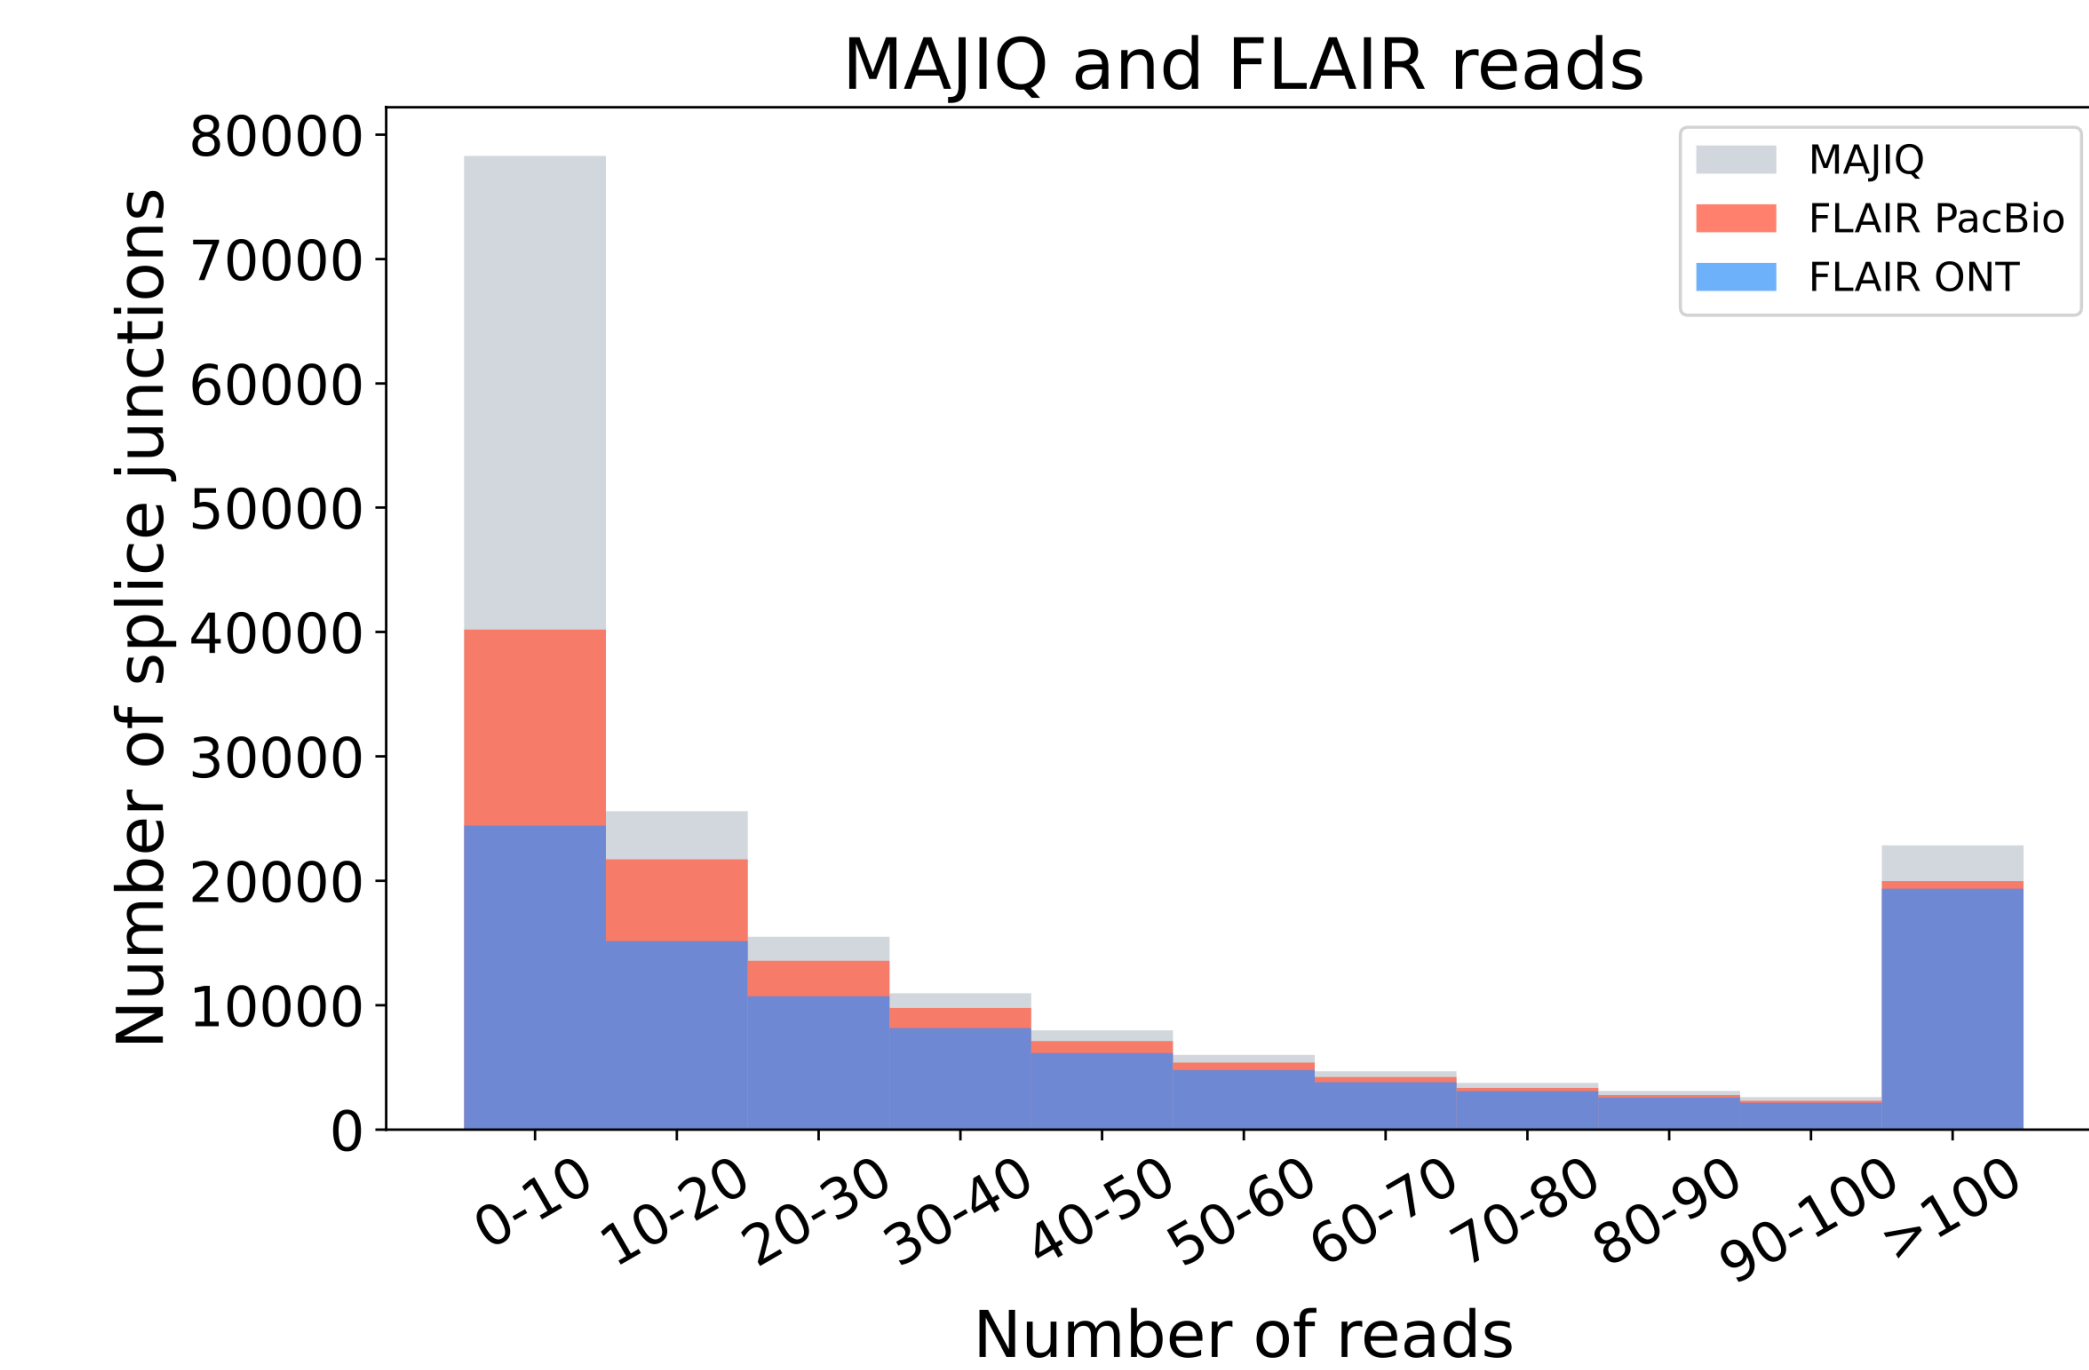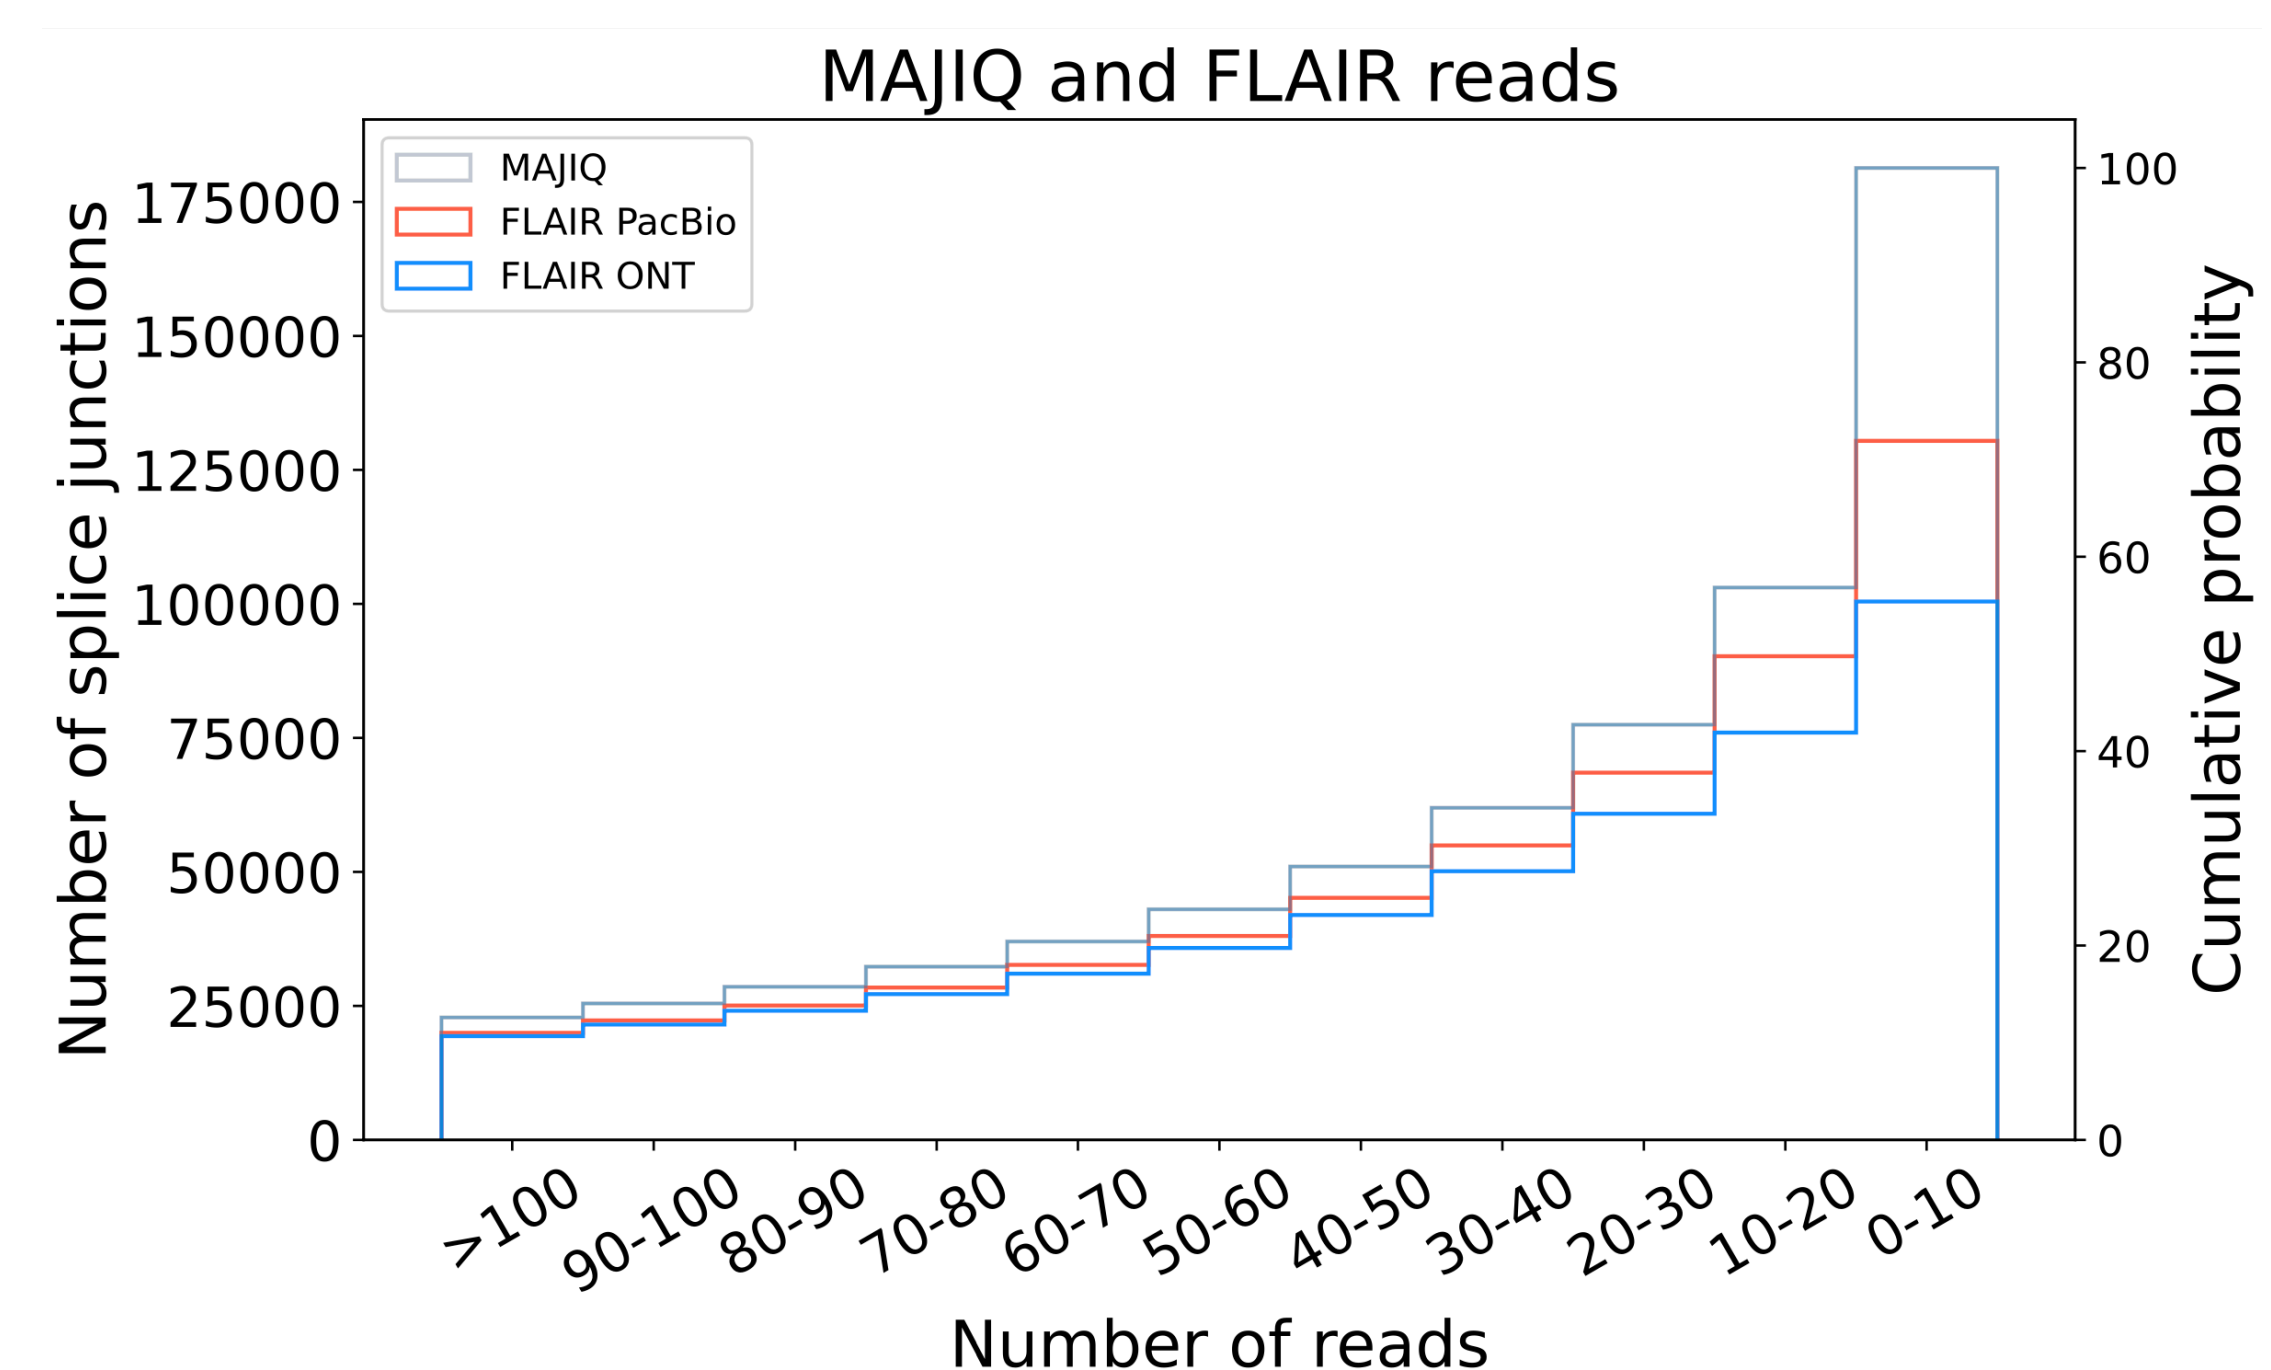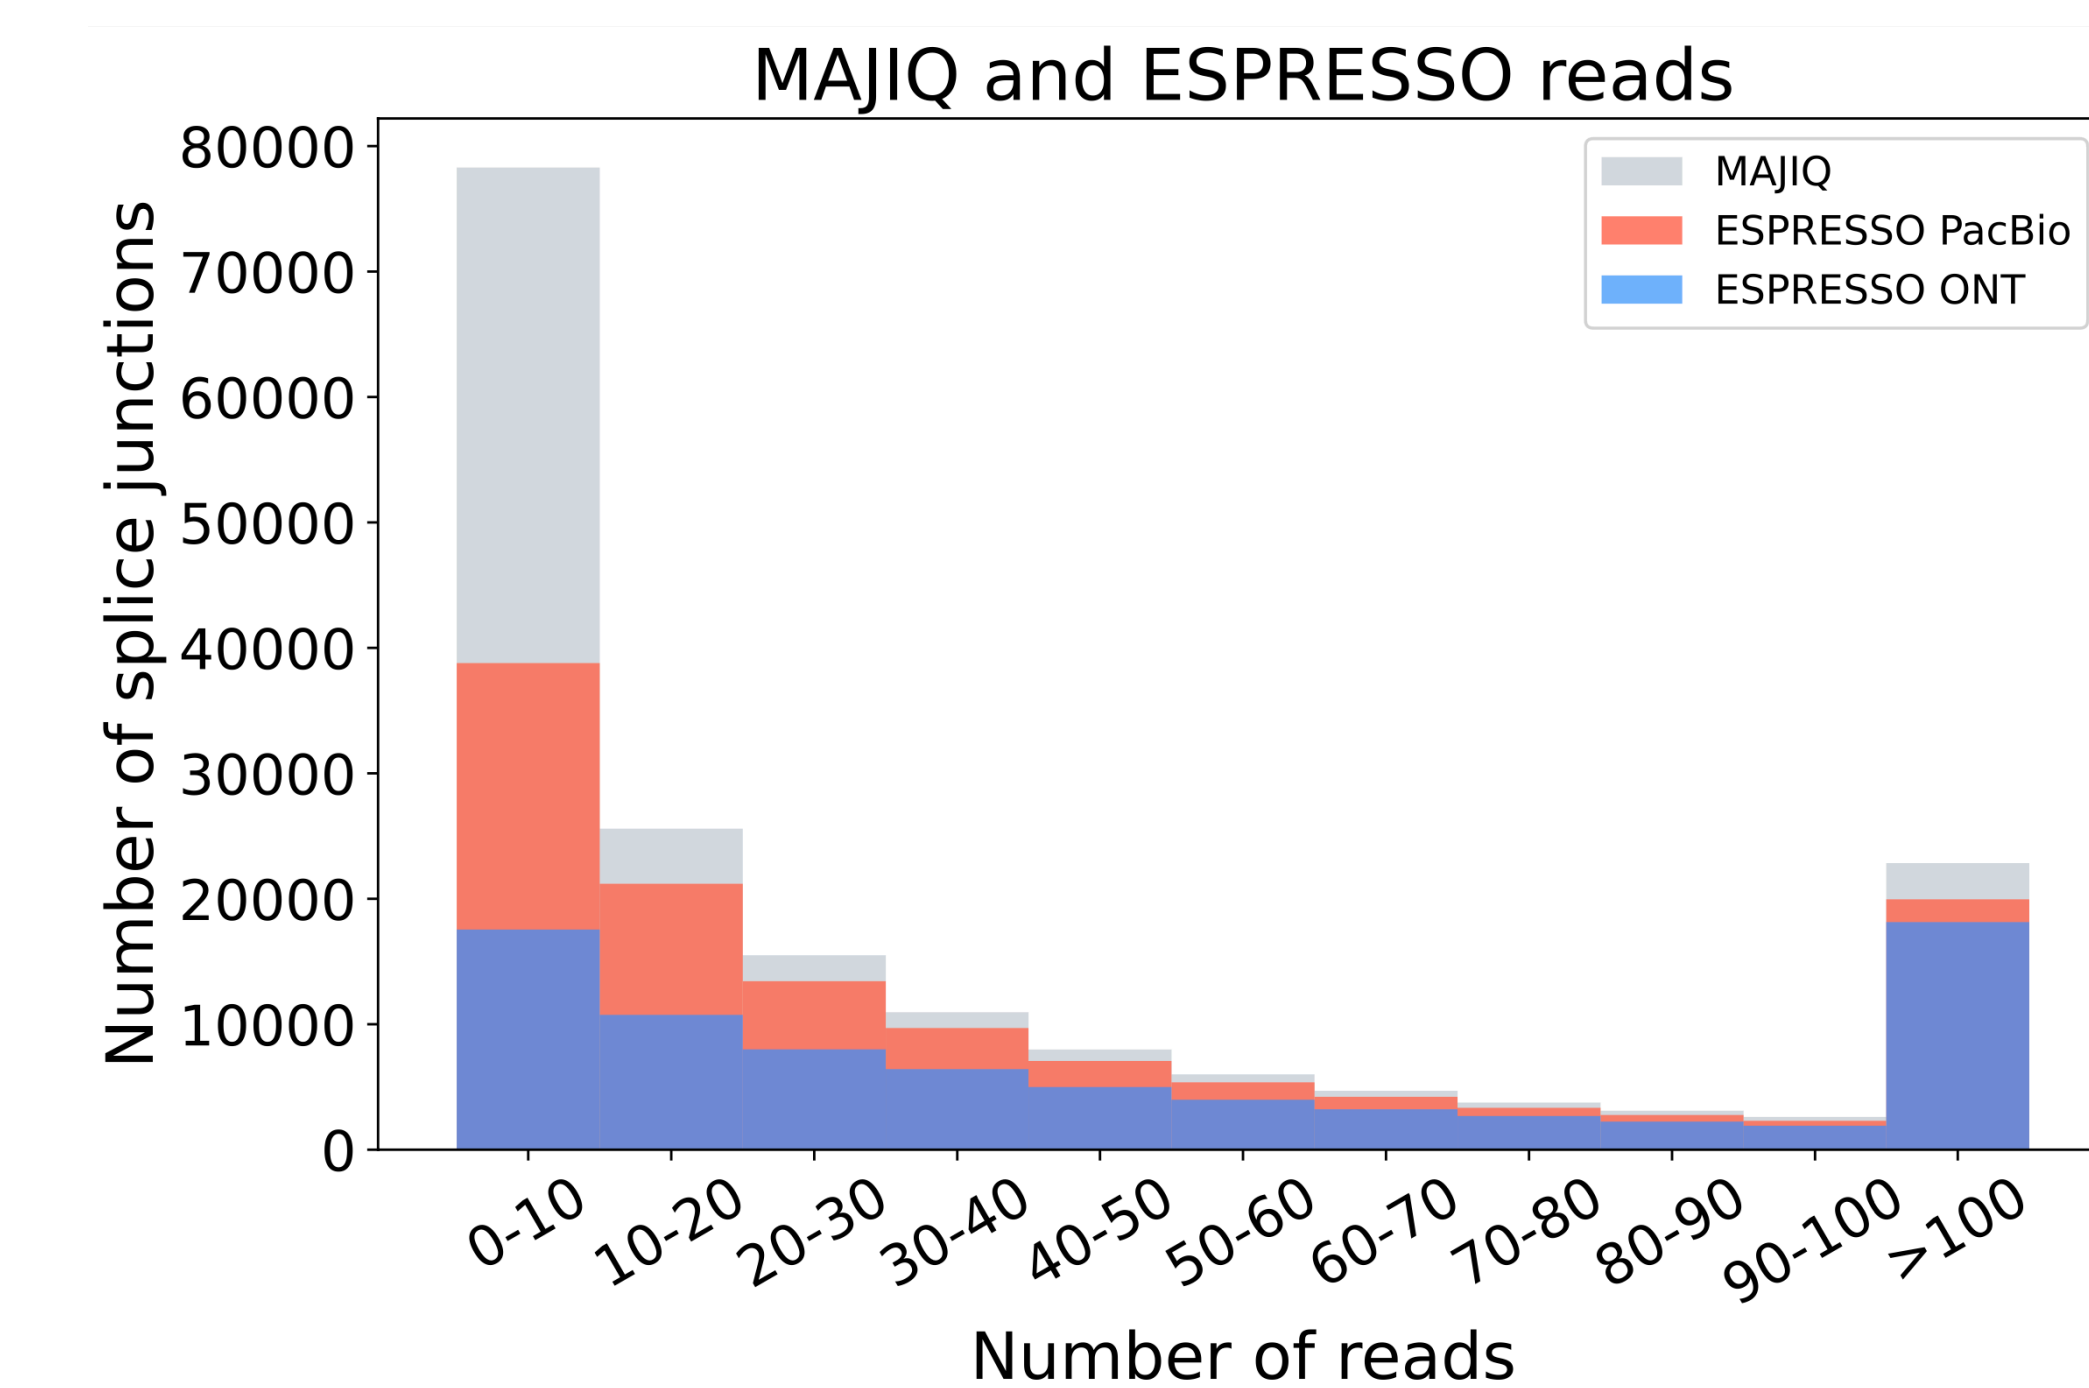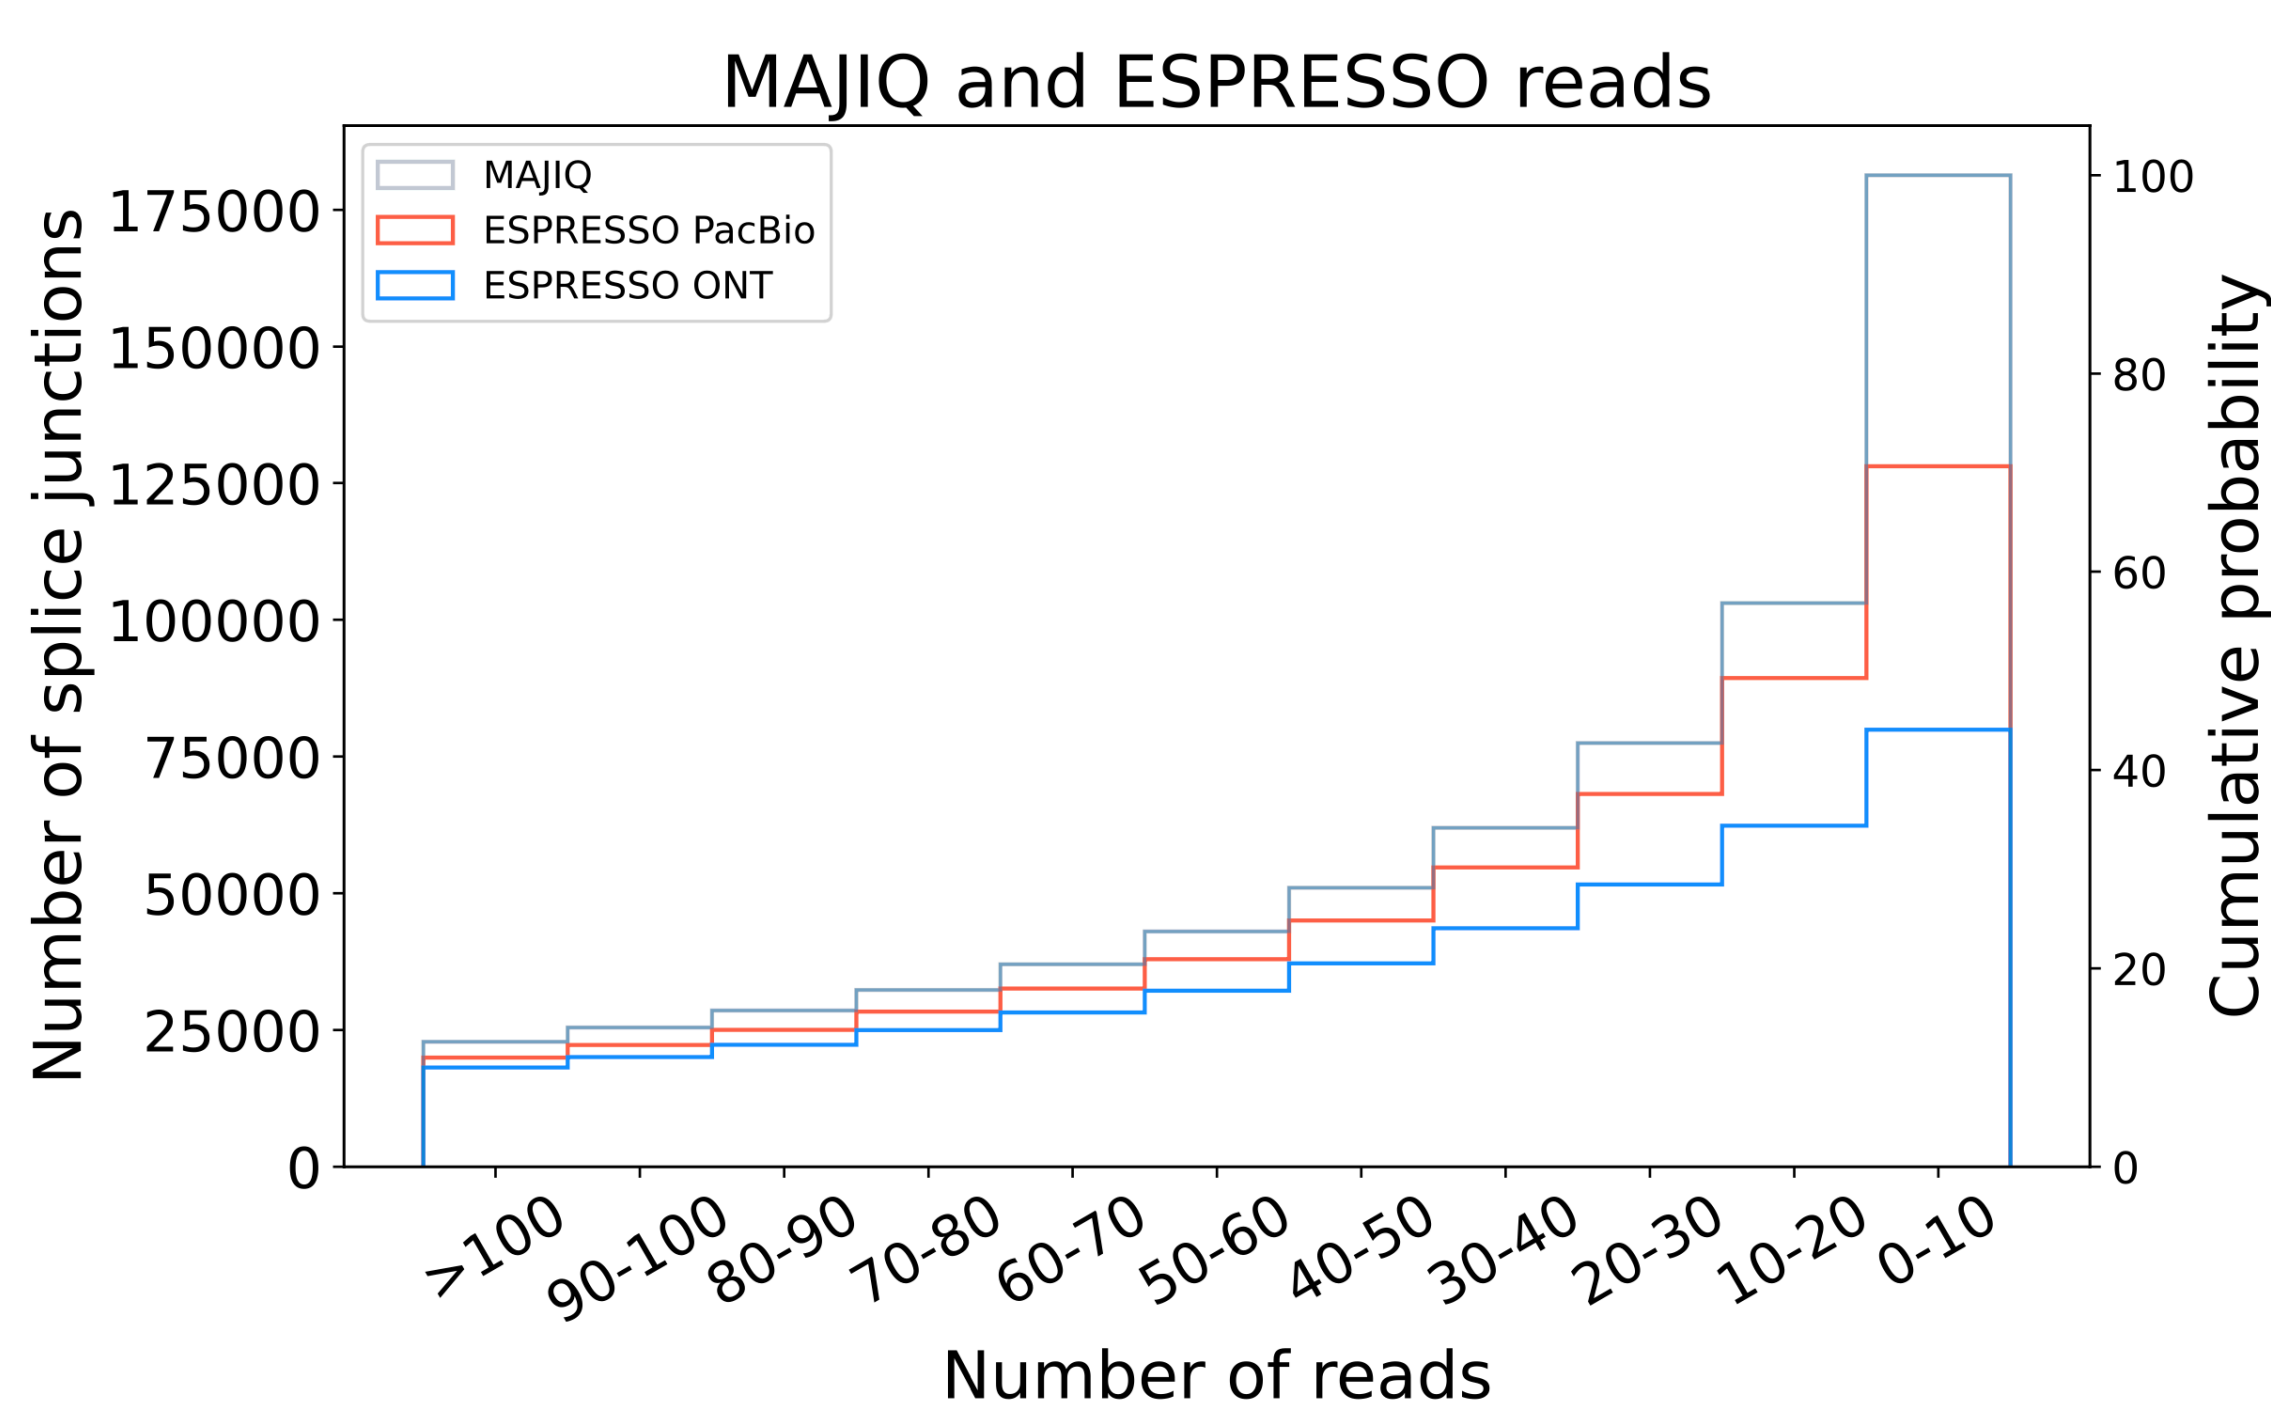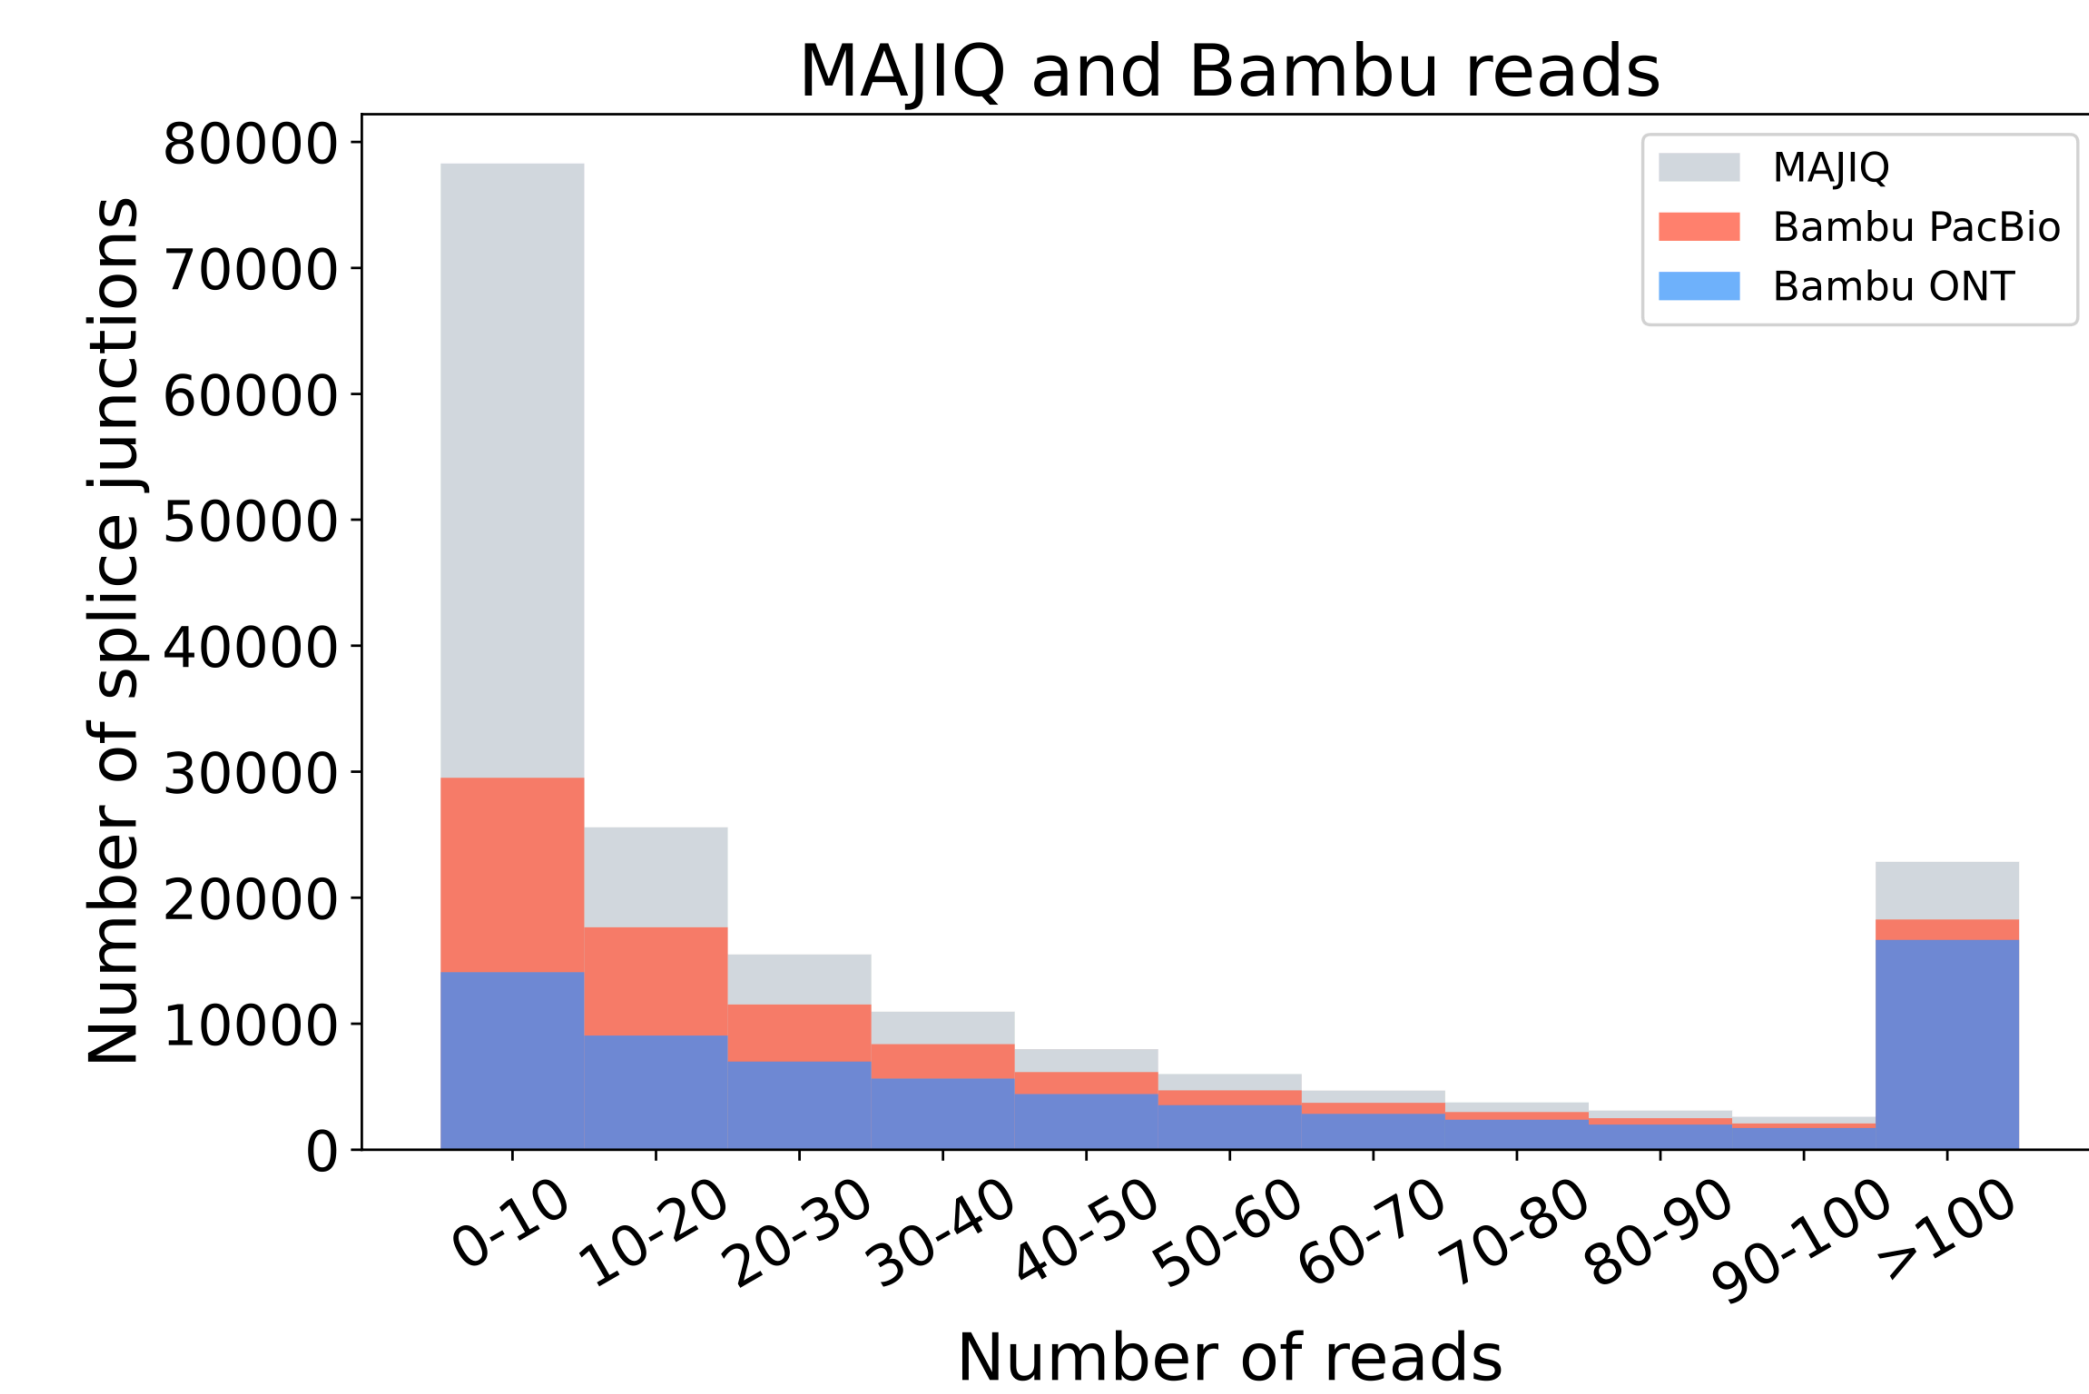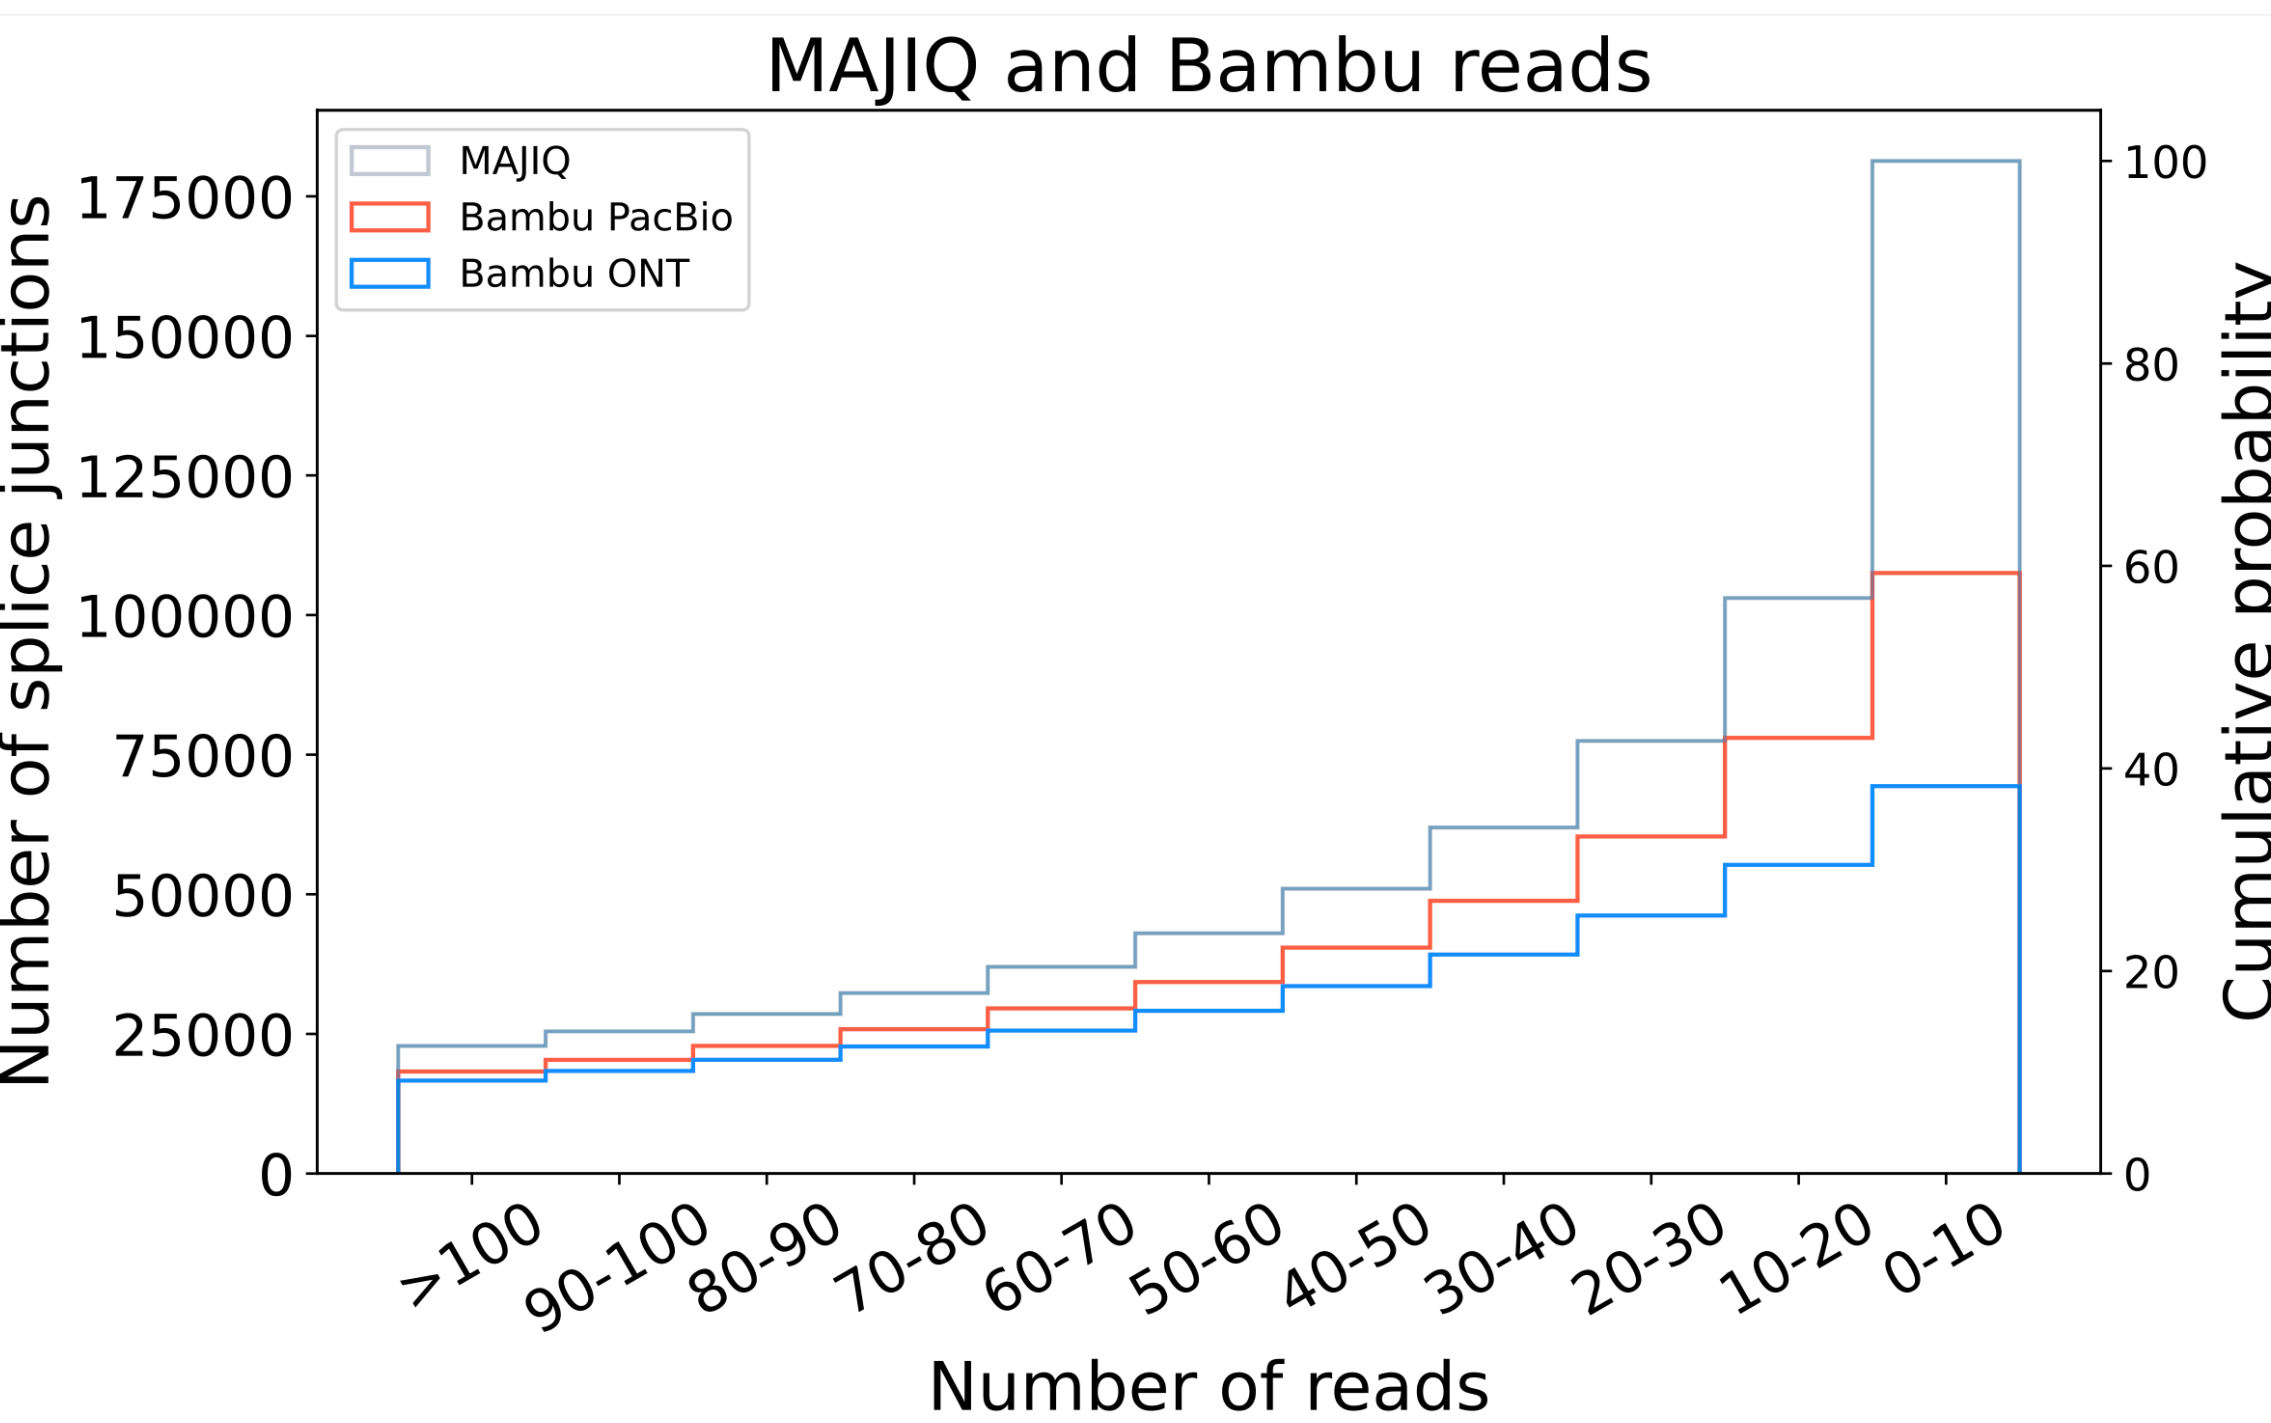

B

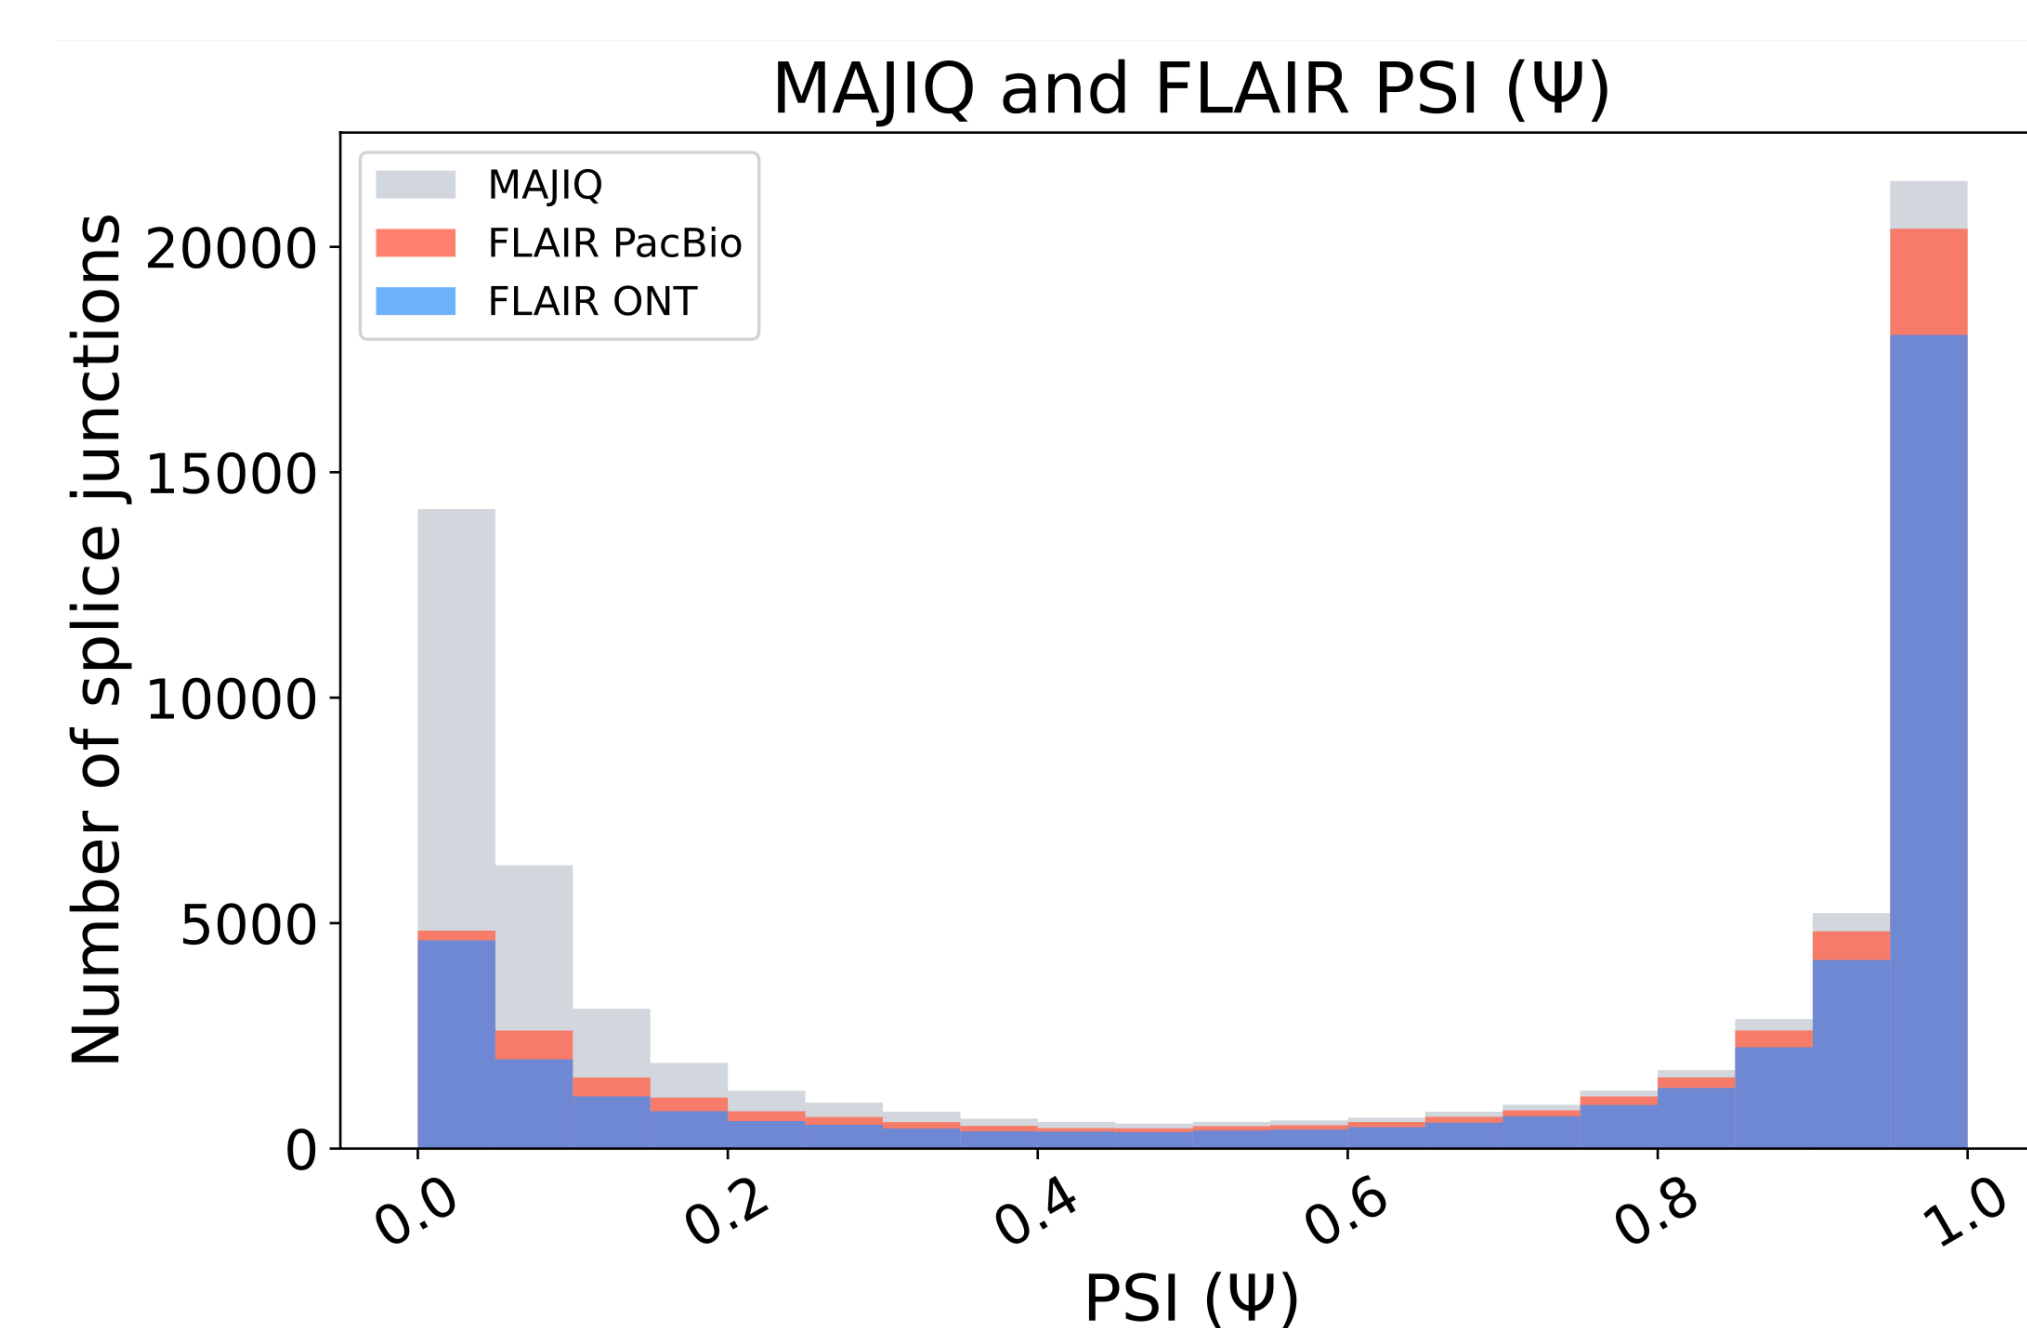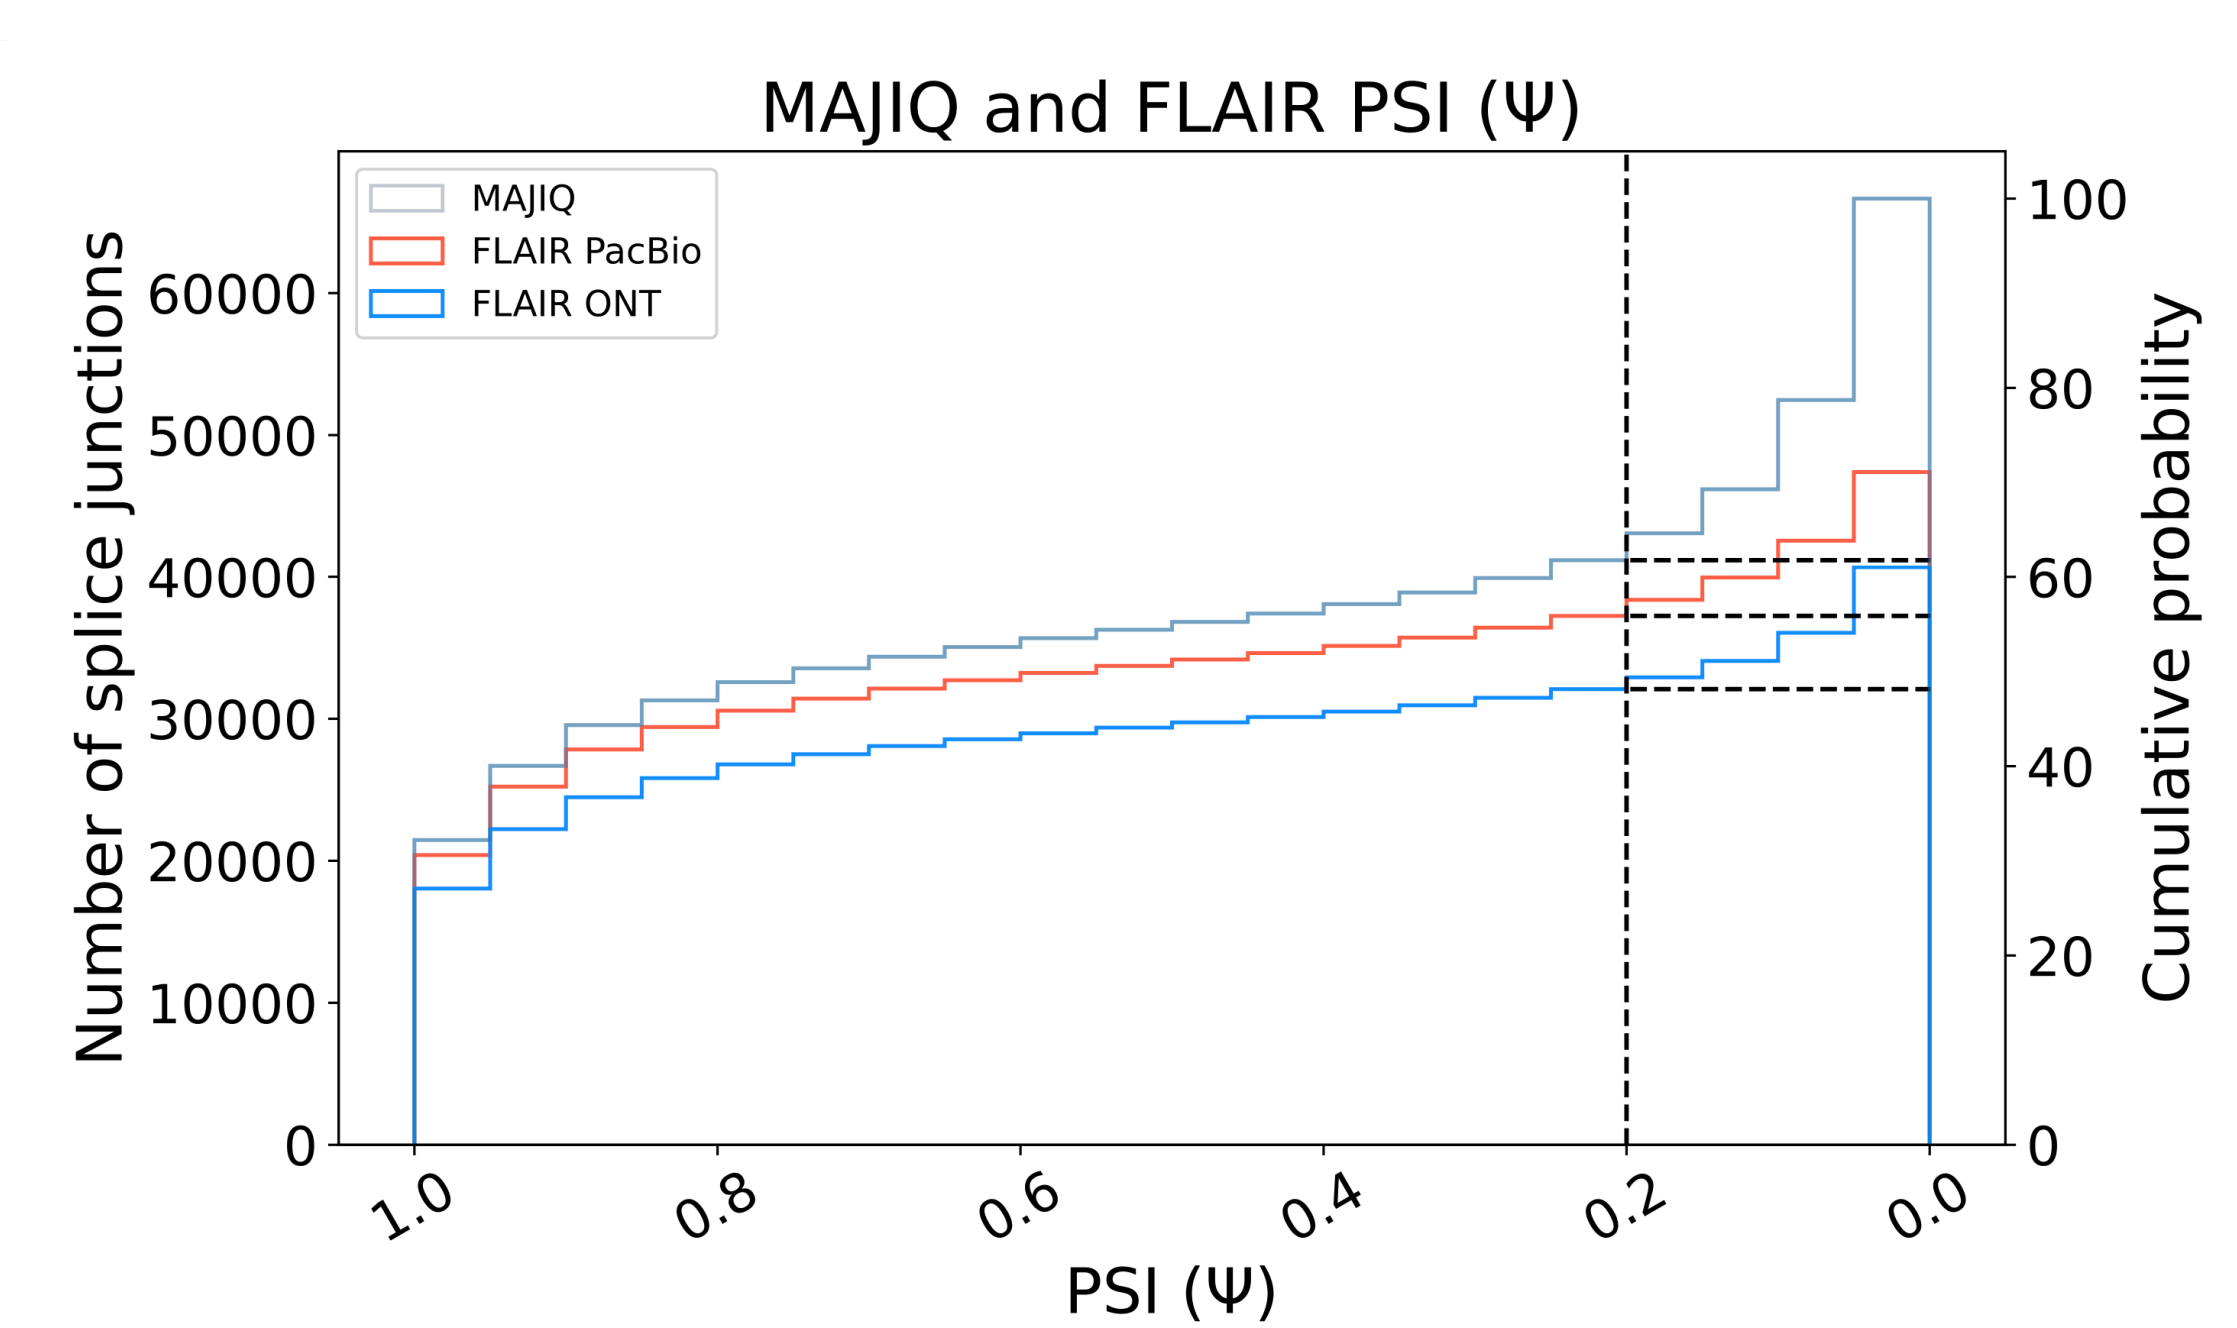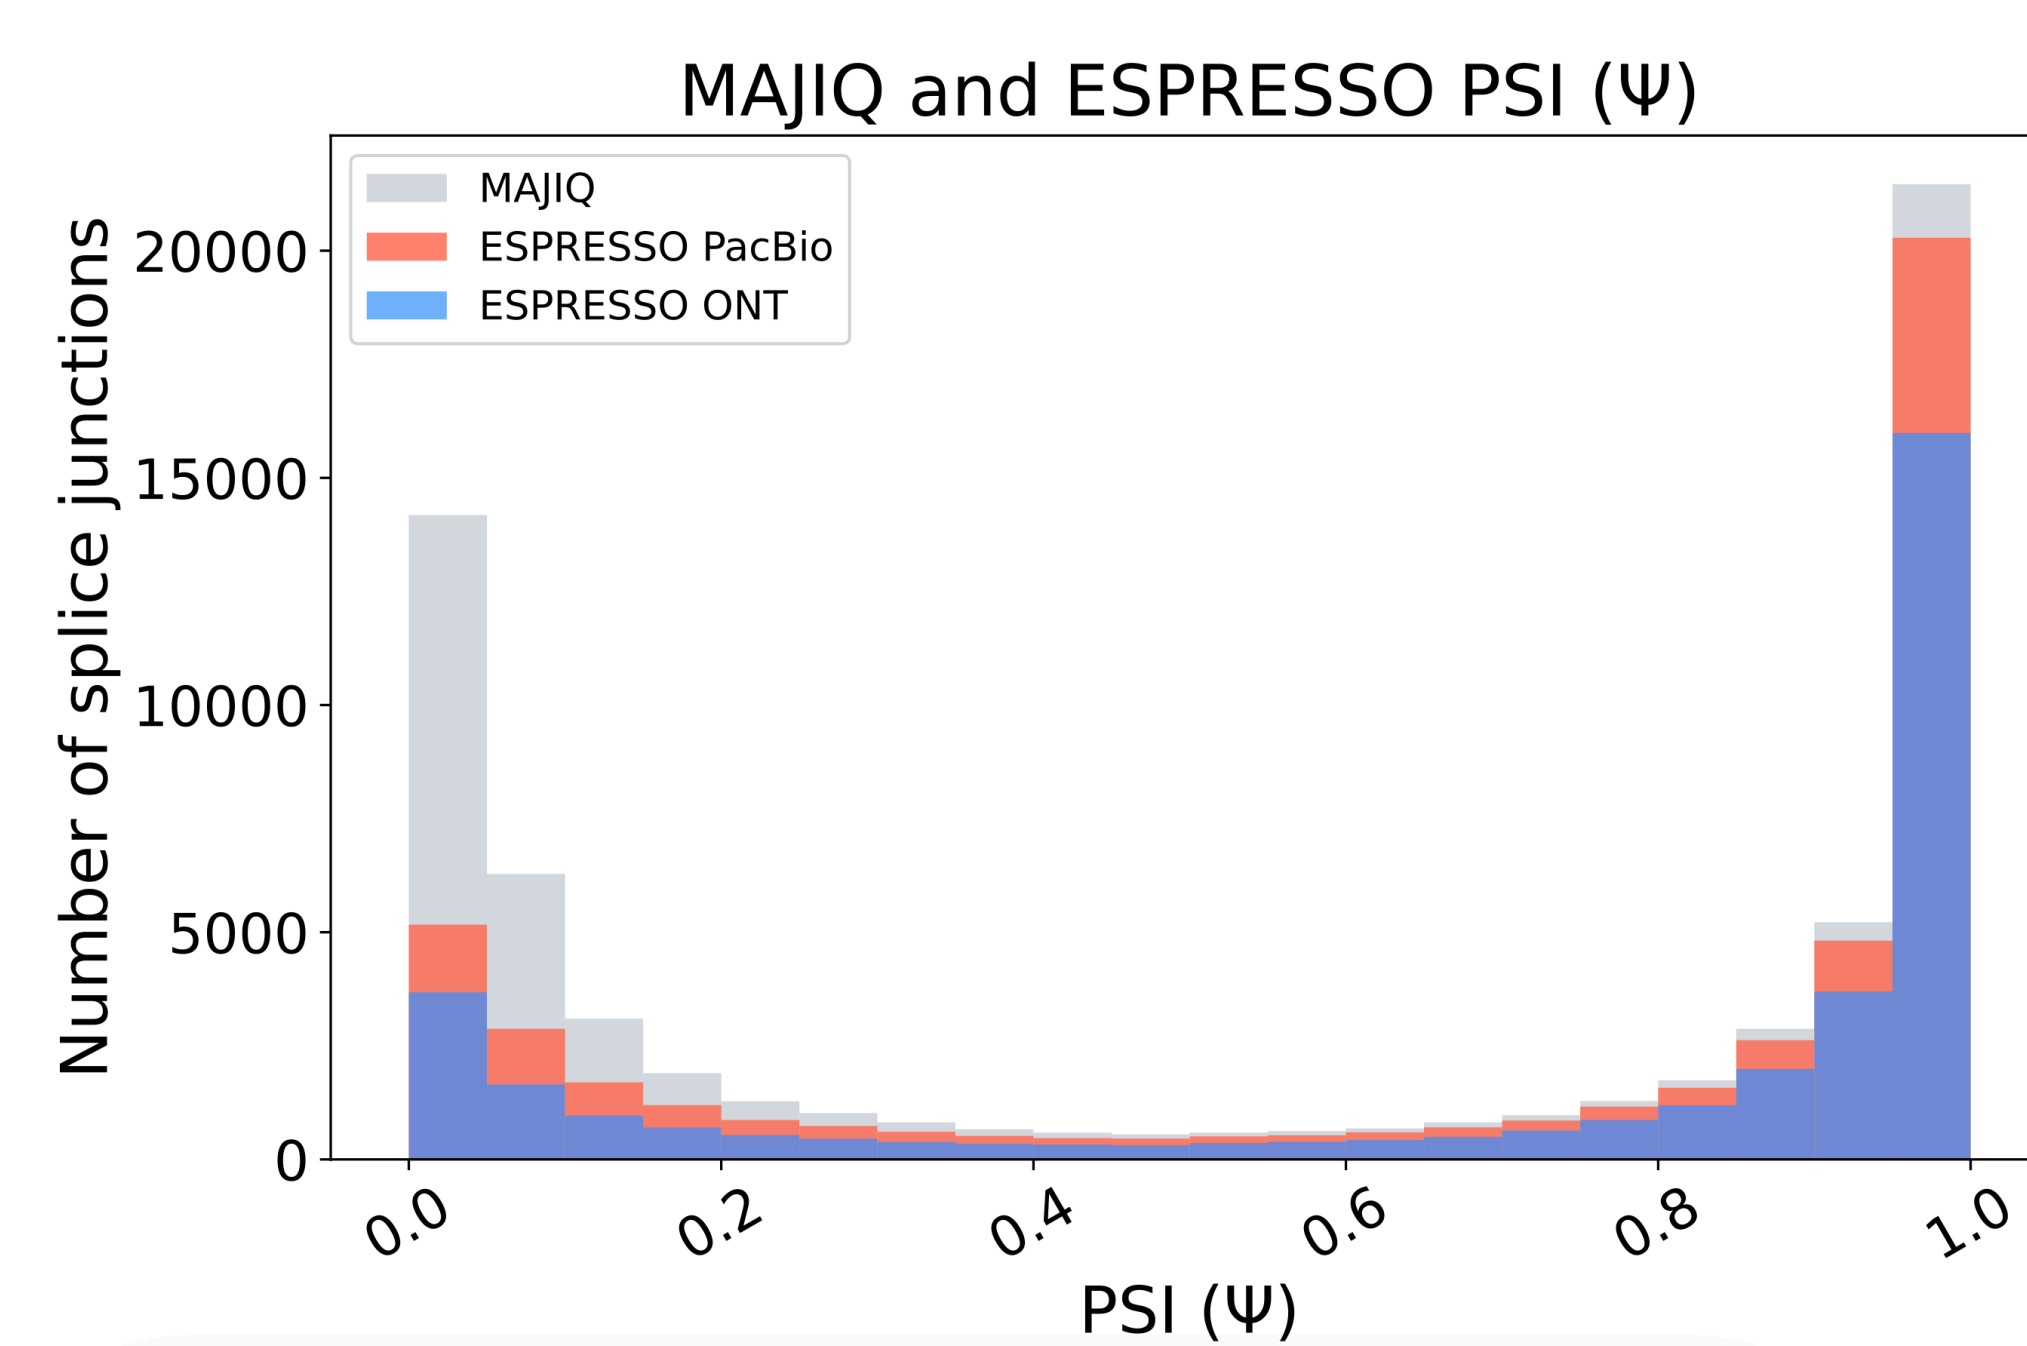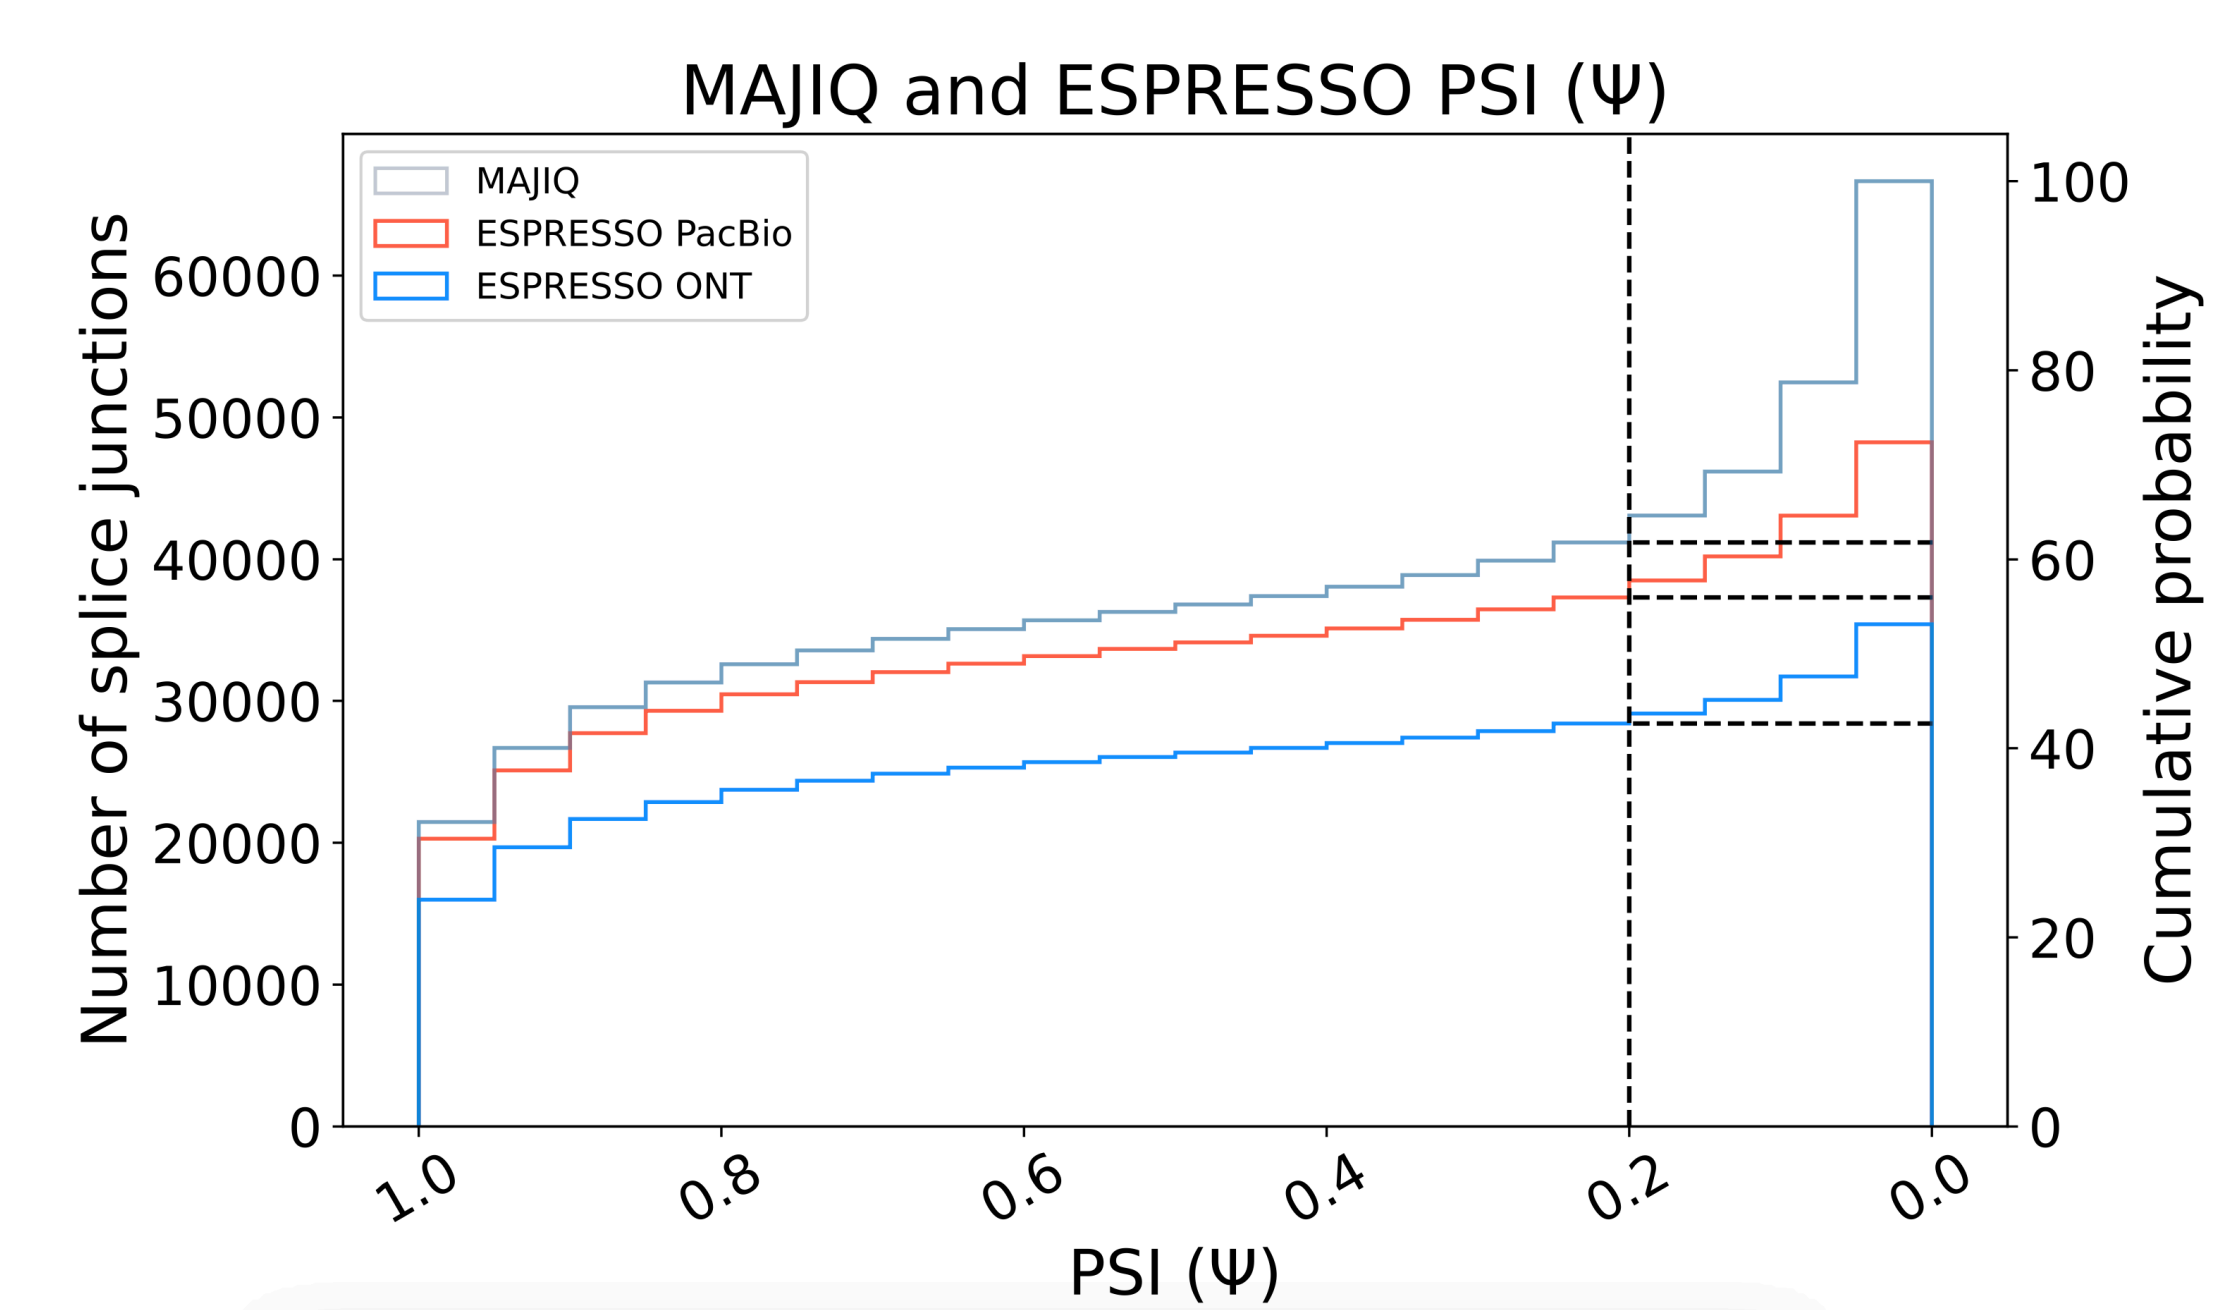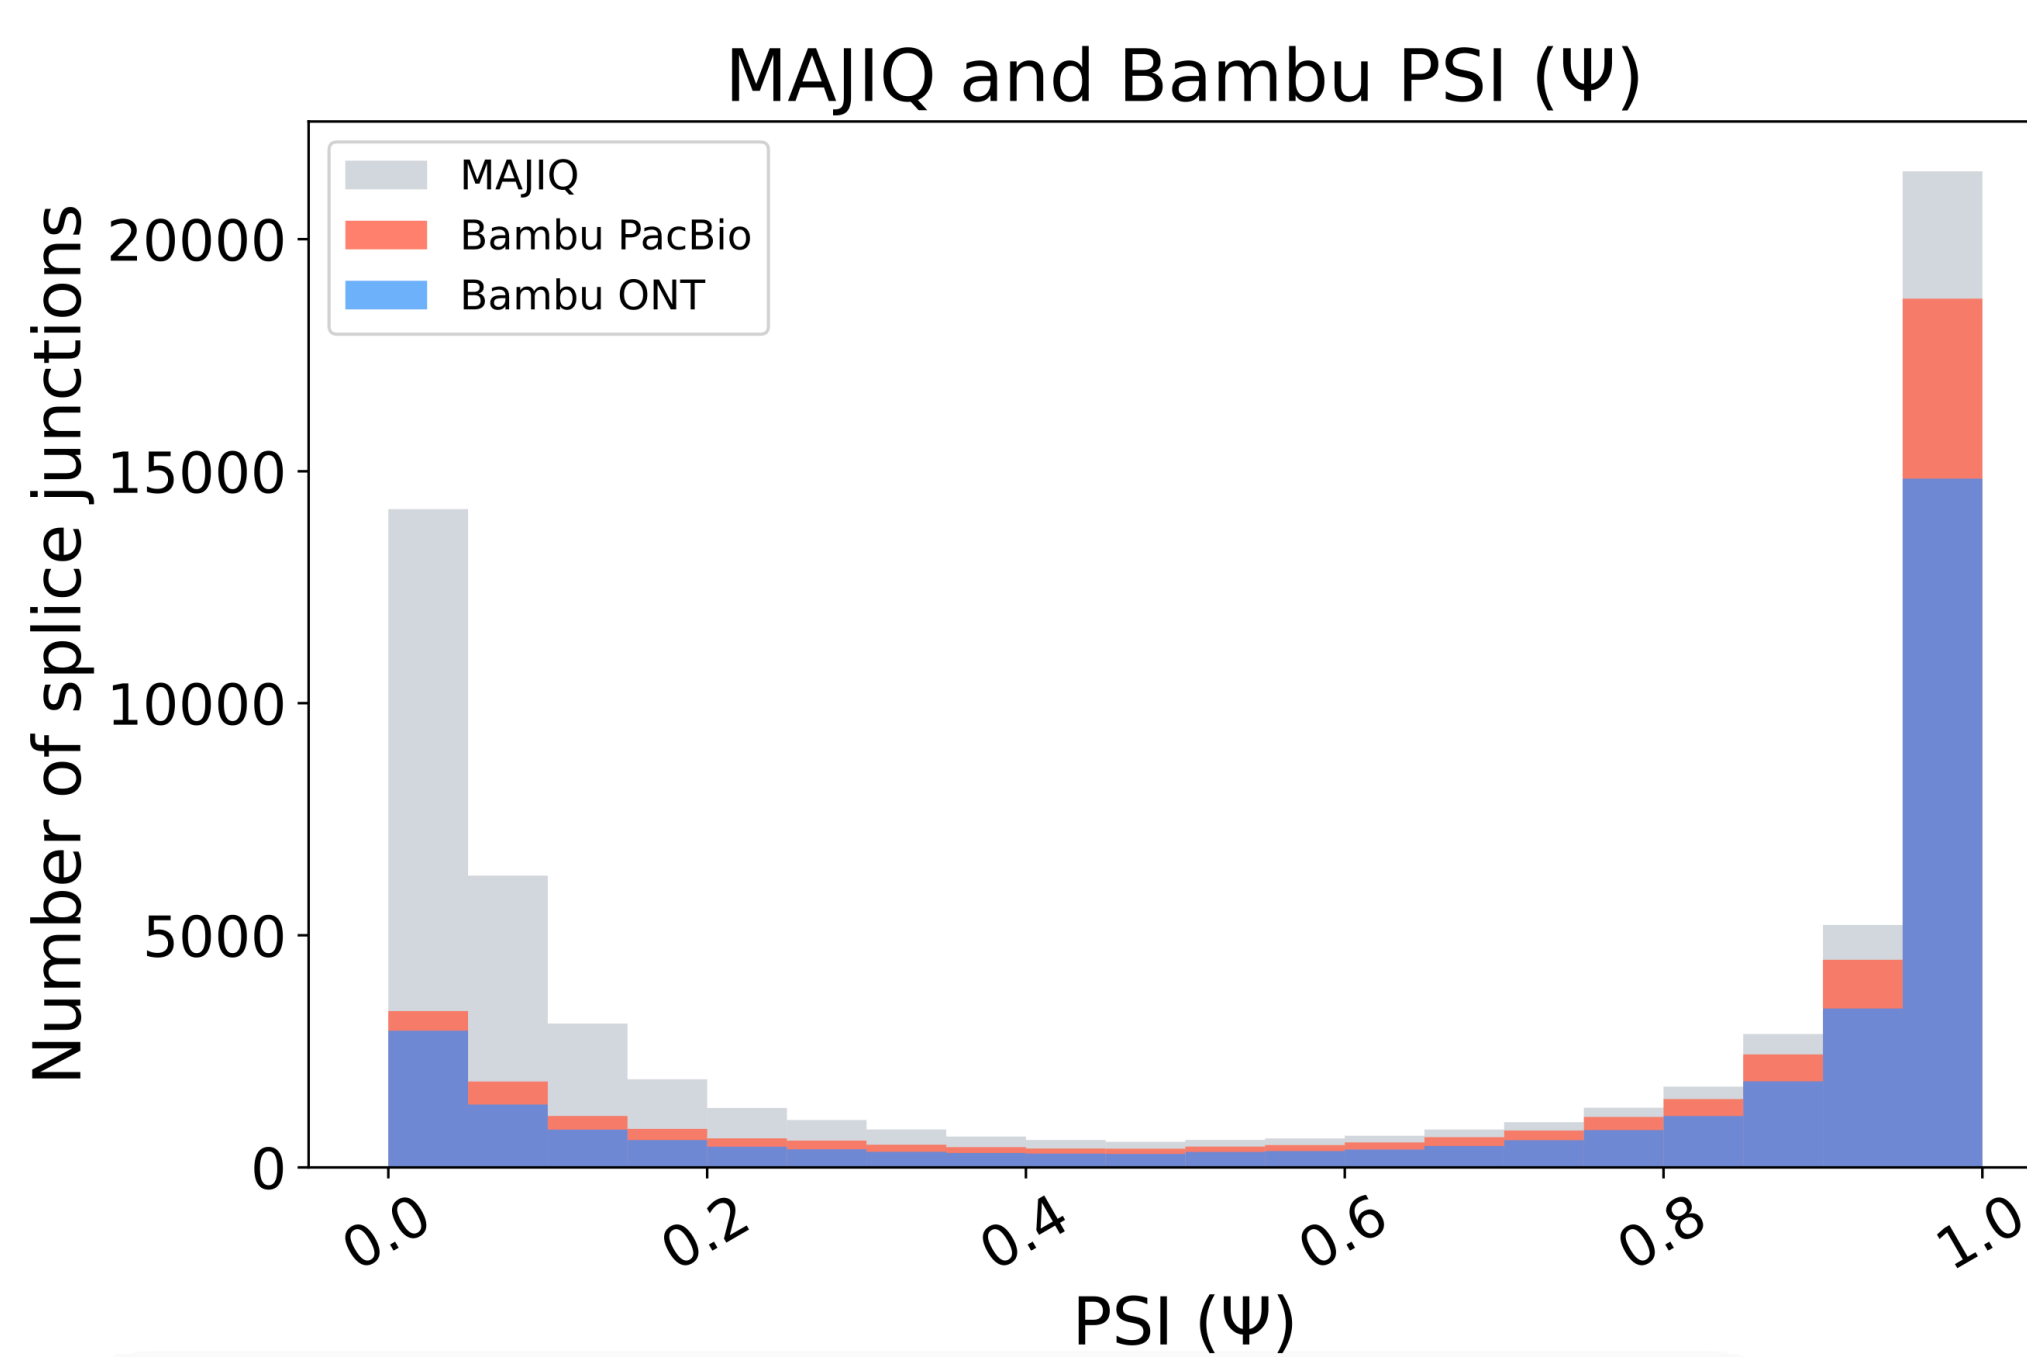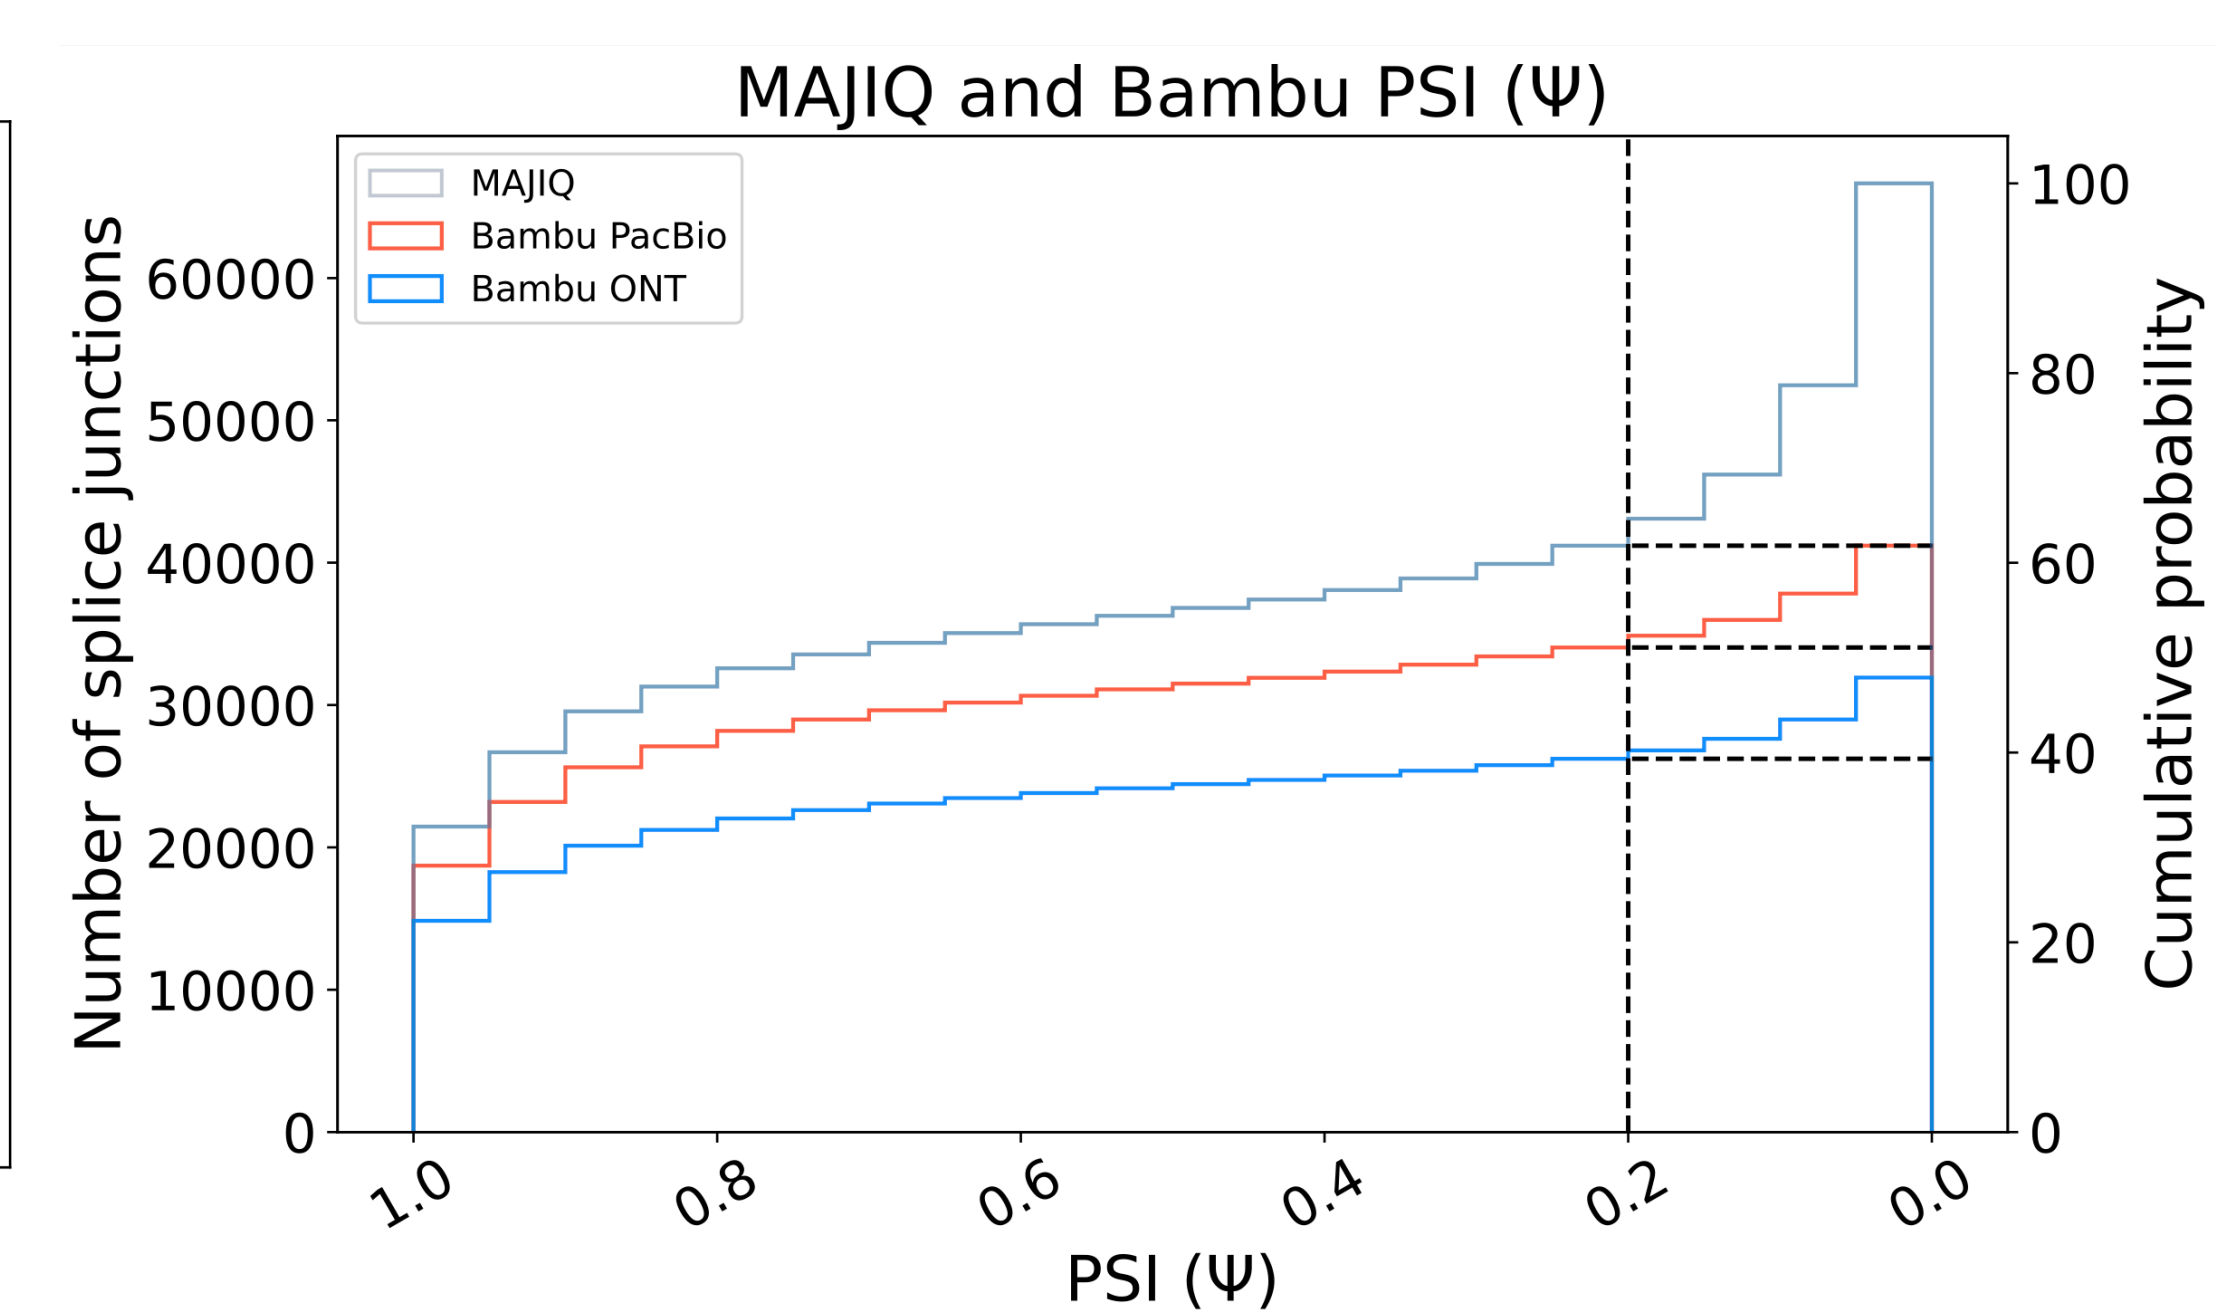

Supplement: Supplemental_code.zip [file Supplemental_Fig_S8.pdf › Supplemental_code/figures/Supplemental_Fig_S8/Supplemental_Fig_S8.pdf]

# MAJIQ and Bambu PSI ( $\Psi$ )

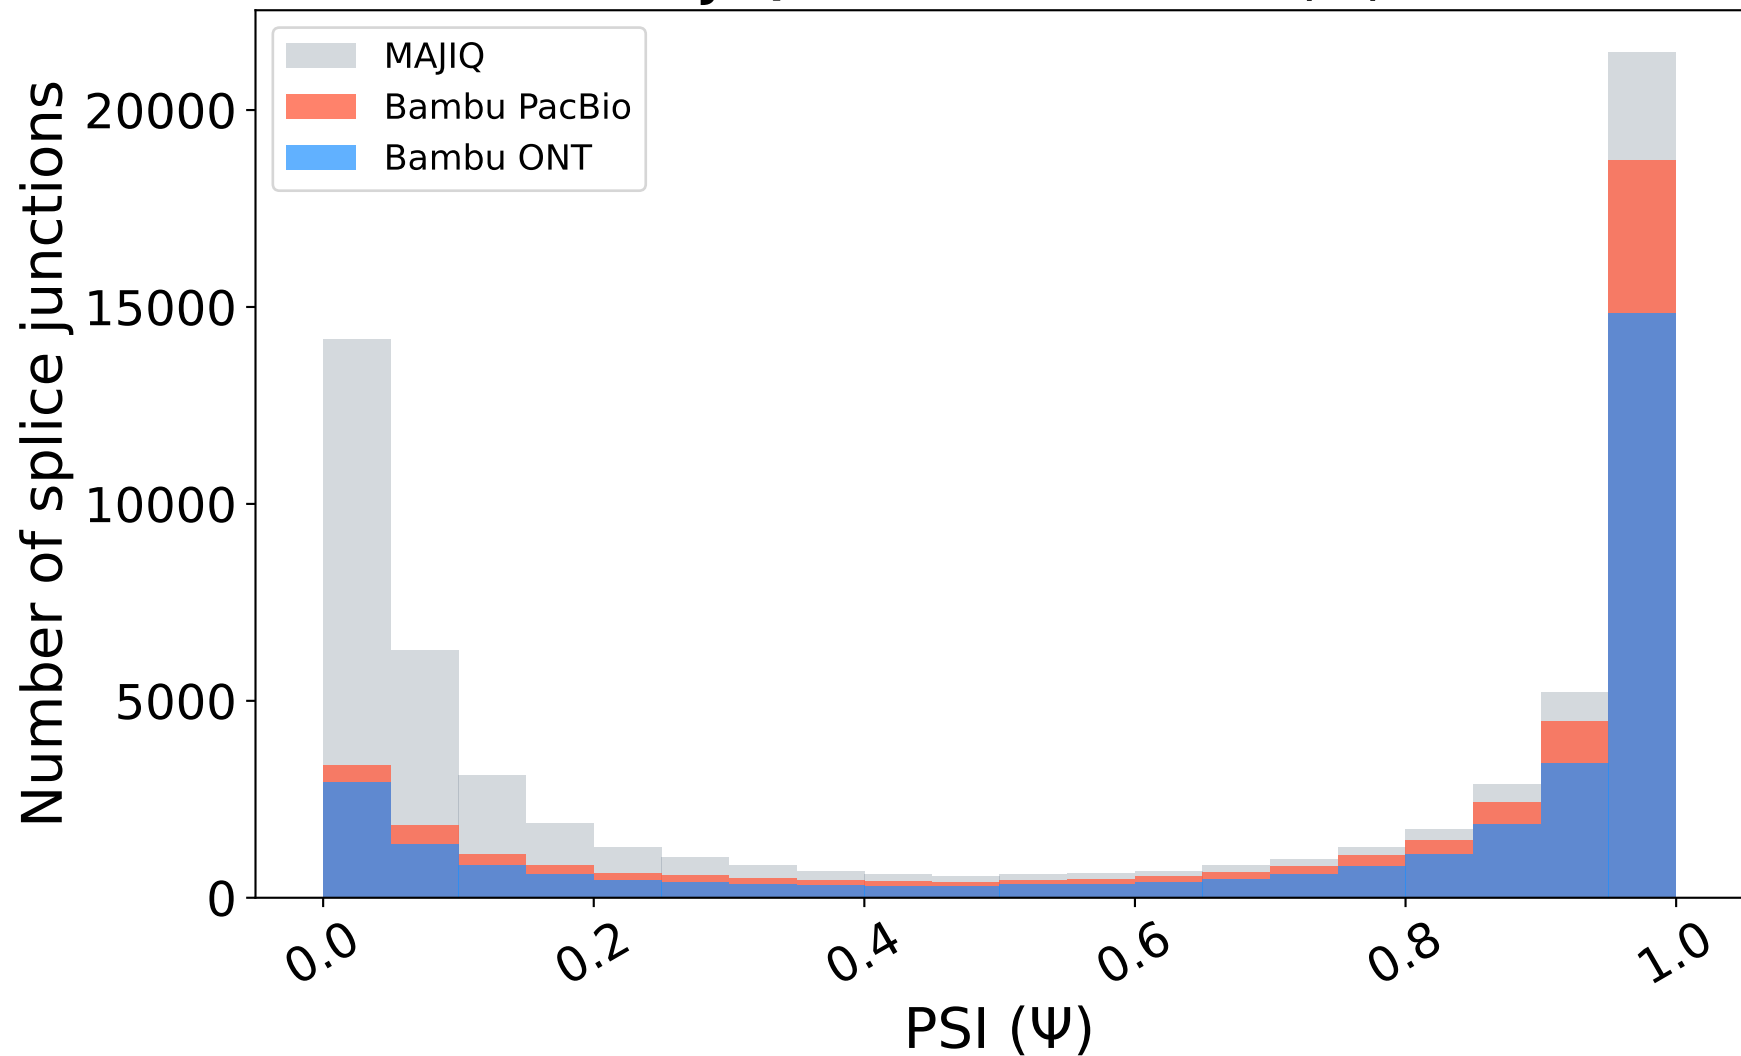

Supplement: Supplemental_code.zip [file Supplemental_Fig_S8A_bambu_psi1.pdf › Supplemental_code/figures/Supplemental_Fig_S8/Supplemental_Fig_S8A_bambu_psi1.pdf]

# MAJIQ and BamBU reads

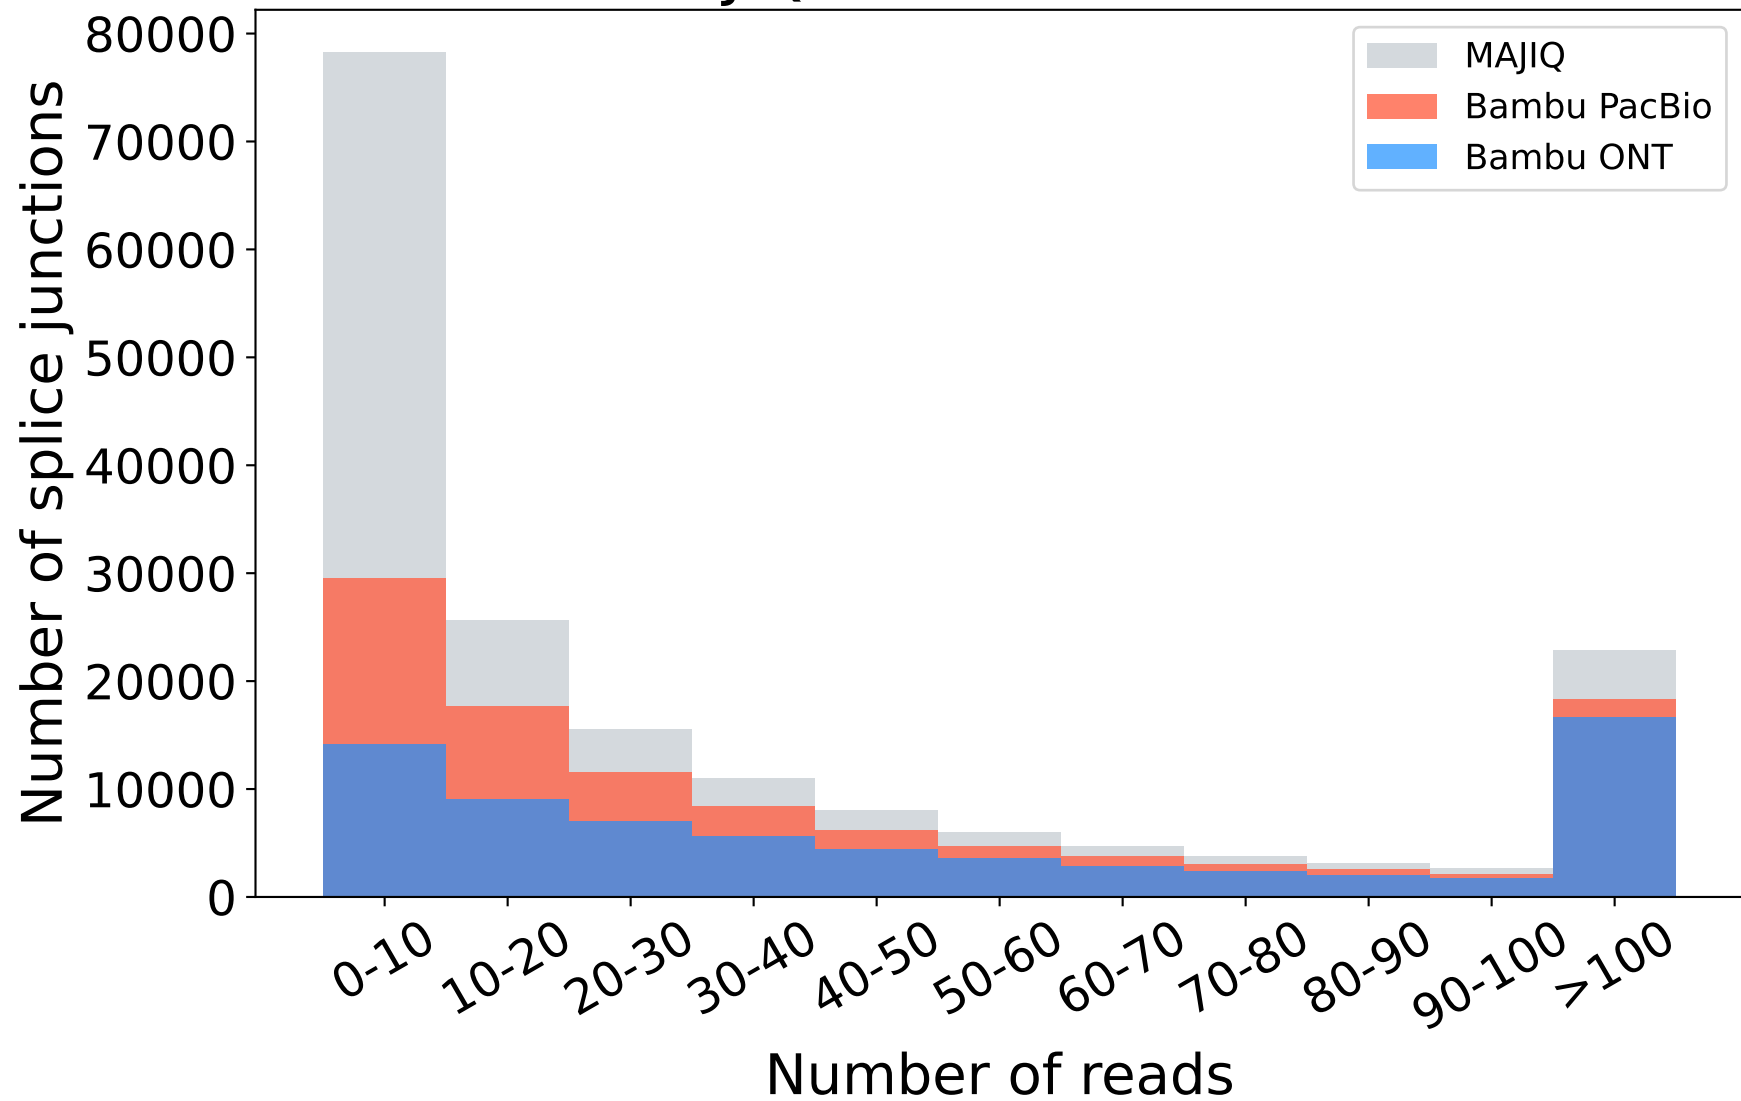

Supplement: Supplemental_code.zip [file Supplemental_Fig_S8A_bambu_read1.pdf › Supplemental_code/figures/Supplemental_Fig_S8/Supplemental_Fig_S8A_bambu_read1.pdf]

# MAJIQ and ESPRESSO PSI ( $\Psi$ )

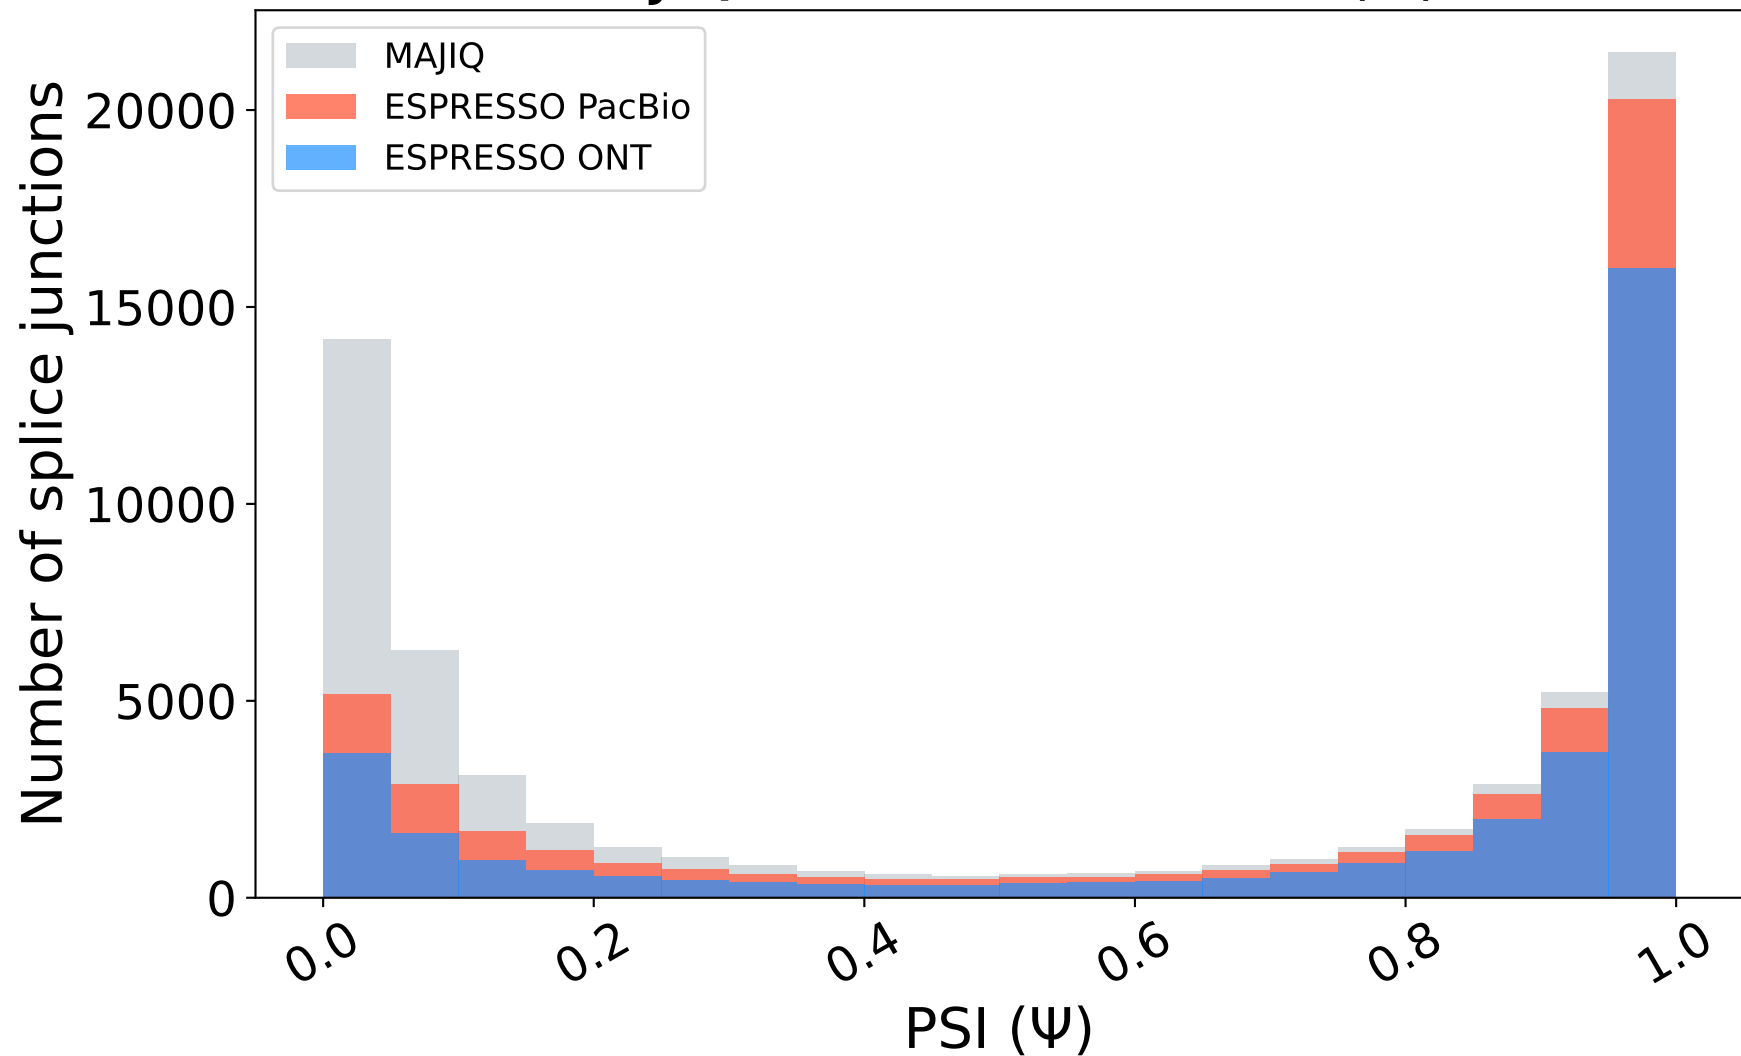

Supplement: Supplemental_code.zip [file Supplemental_Fig_S8A_esp_psi1.pdf › Supplemental_code/figures/Supplemental_Fig_S8/Supplemental_Fig_S8A_esp_psi1.pdf]

# MAJIQ and ESPRESSO reads

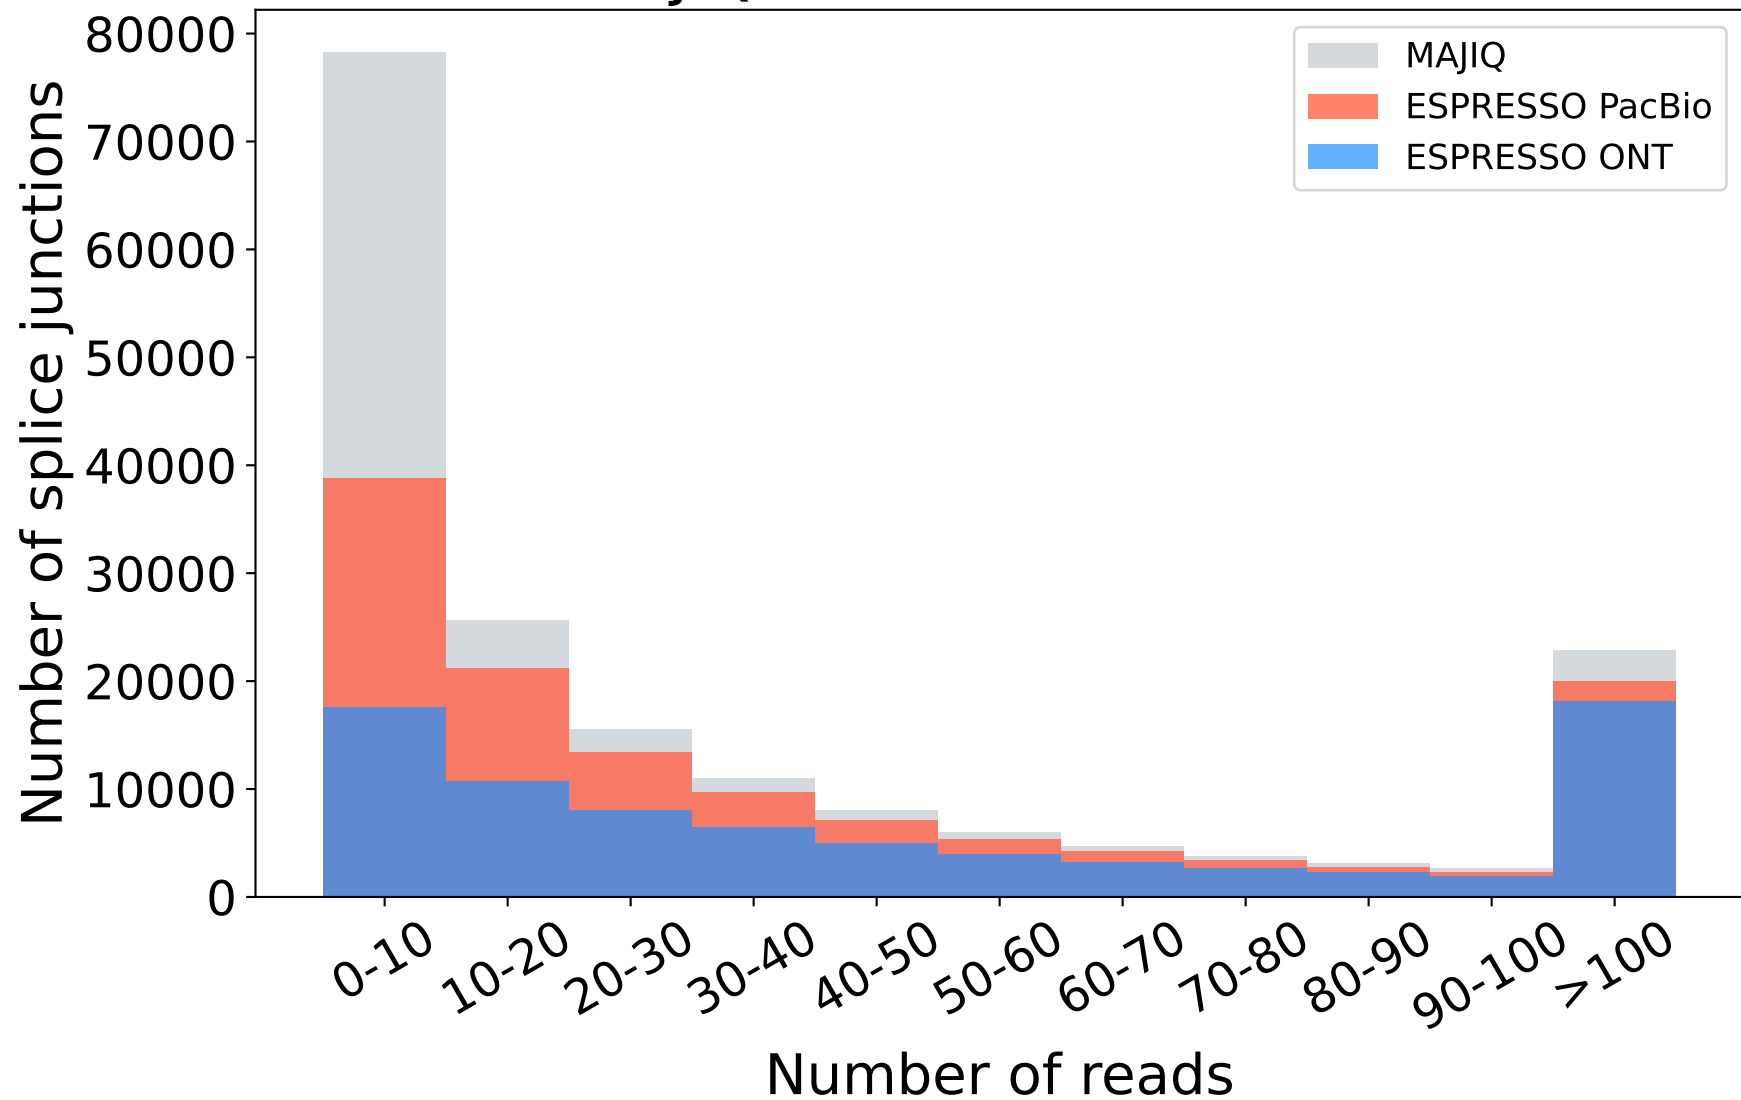

Supplement: Supplemental_code.zip [file Supplemental_Fig_S8A_esp_read1.pdf › Supplemental_code/figures/Supplemental_Fig_S8/Supplemental_Fig_S8A_esp_read1.pdf]

# MAJIQ and FLAIR PSI ( $\Psi$ )

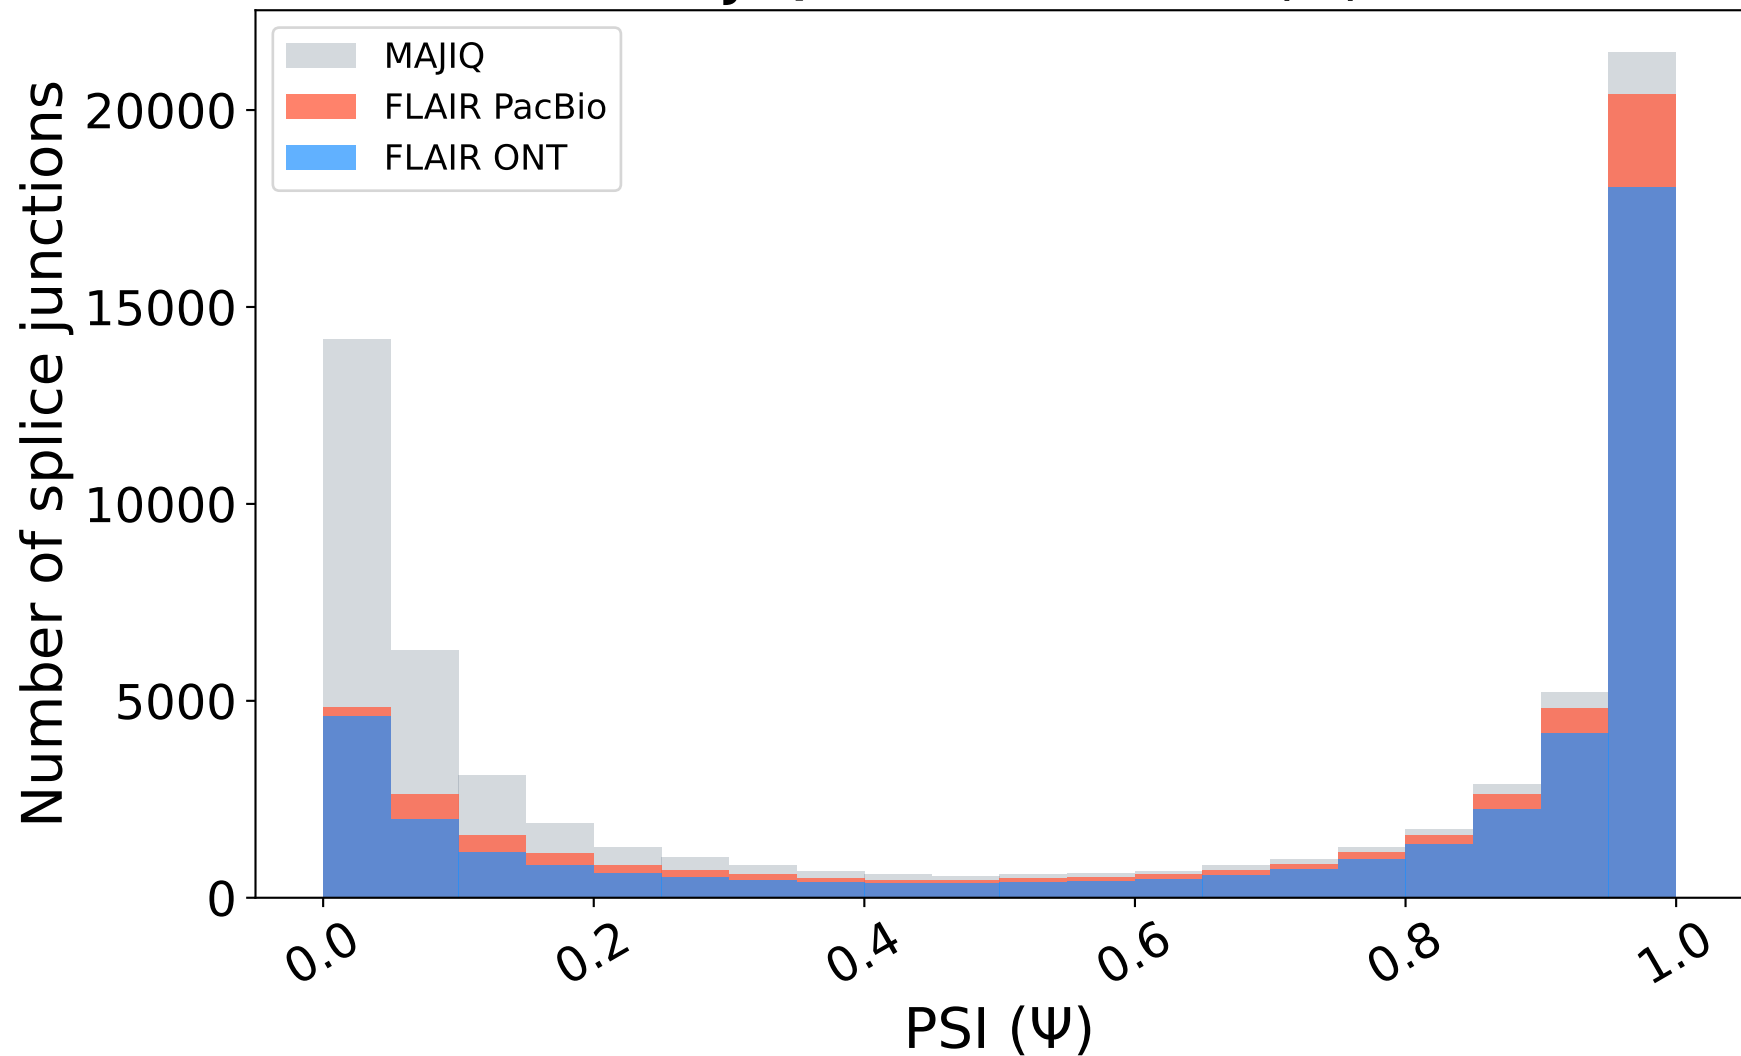

Supplement: Supplemental_code.zip [file Supplemental_Fig_S8A_flair_psi1.pdf › Supplemental_code/figures/Supplemental_Fig_S8/Supplemental_Fig_S8A_flair_psi1.pdf]

# MAJIQ and Bambu PSI ( $\Psi$ )

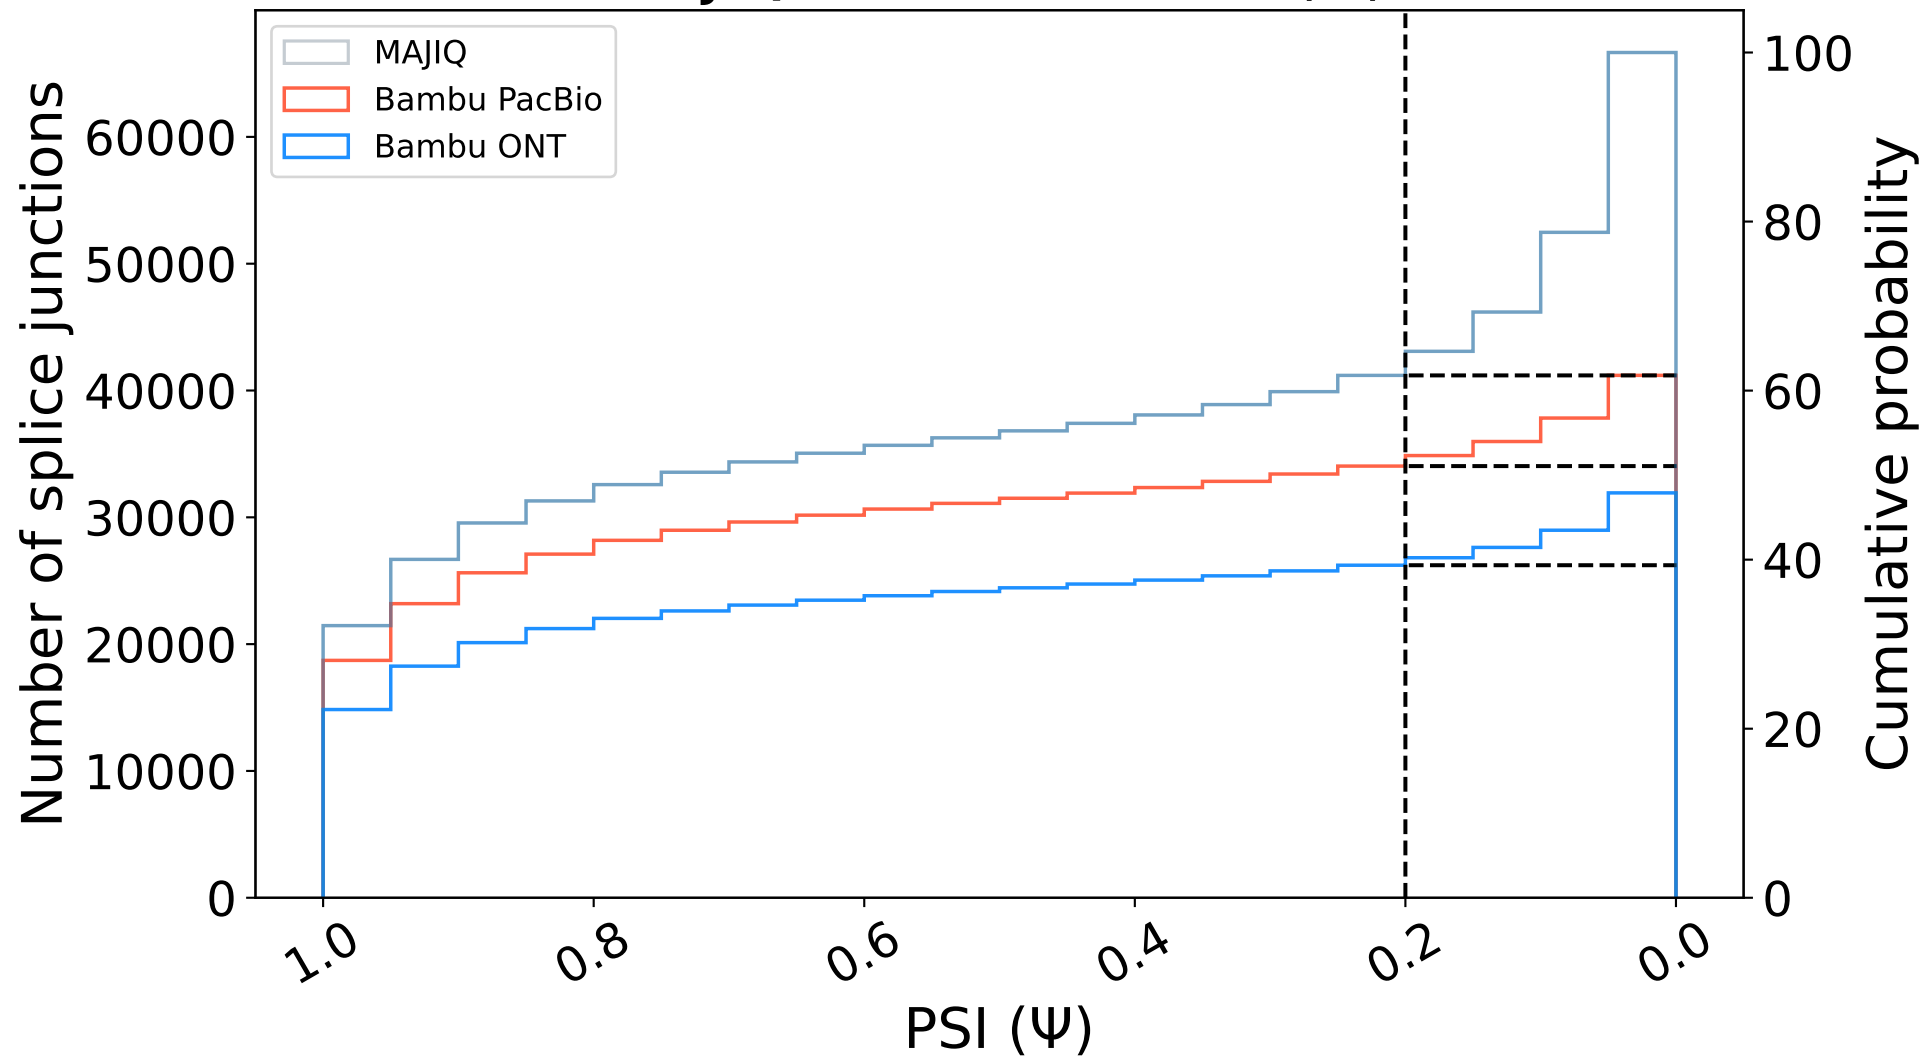

Supplement: Supplemental_code.zip [file Supplemental_Fig_S8B_bambu_psi2.pdf › Supplemental_code/figures/Supplemental_Fig_S8/Supplemental_Fig_S8B_bambu_psi2.pdf]

# MAJIQ and Bambu reads

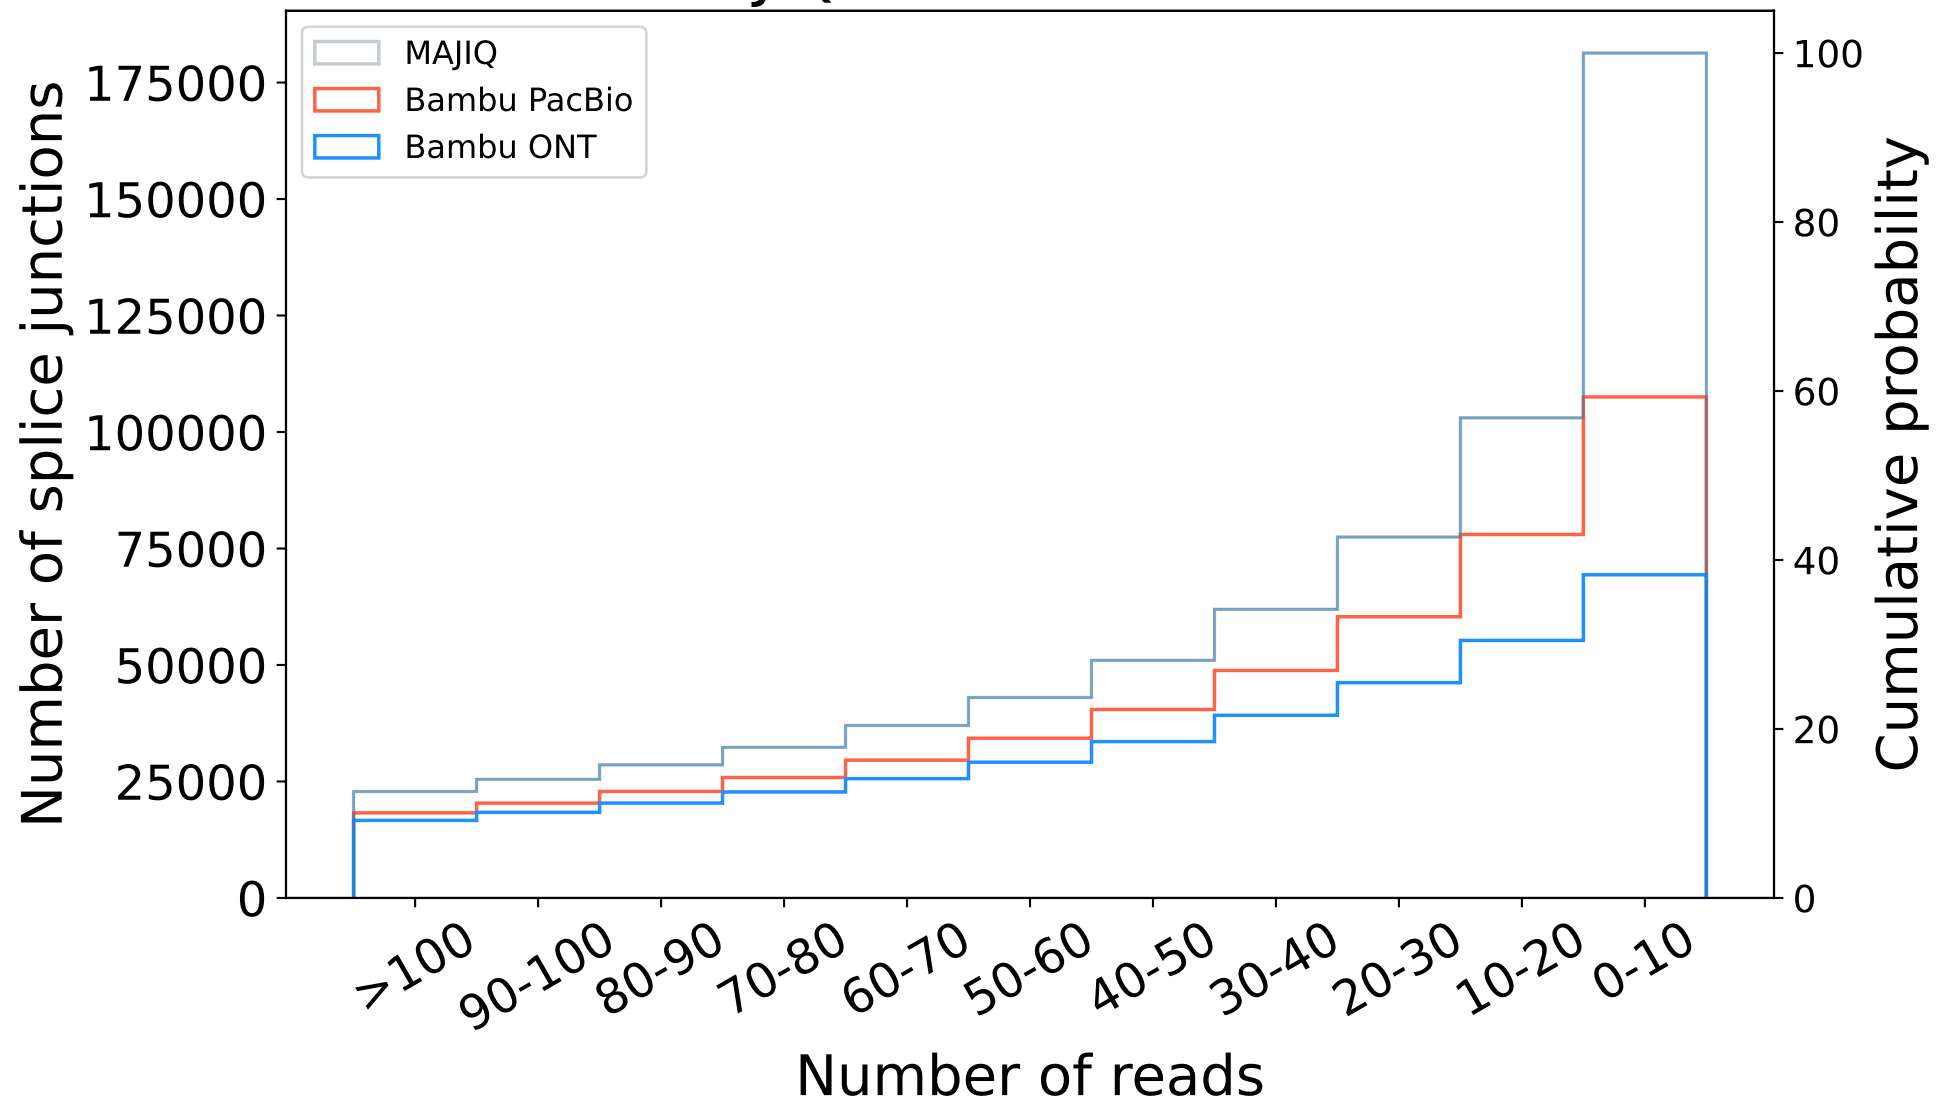

Supplement: Supplemental_code.zip [file Supplemental_Fig_S8B_bambu_read2.pdf › Supplemental_code/figures/Supplemental_Fig_S8/Supplemental_Fig_S8B_bambu_read2.pdf]

# MAJIQ and ESPRESSO PSI ( $\Psi$ )

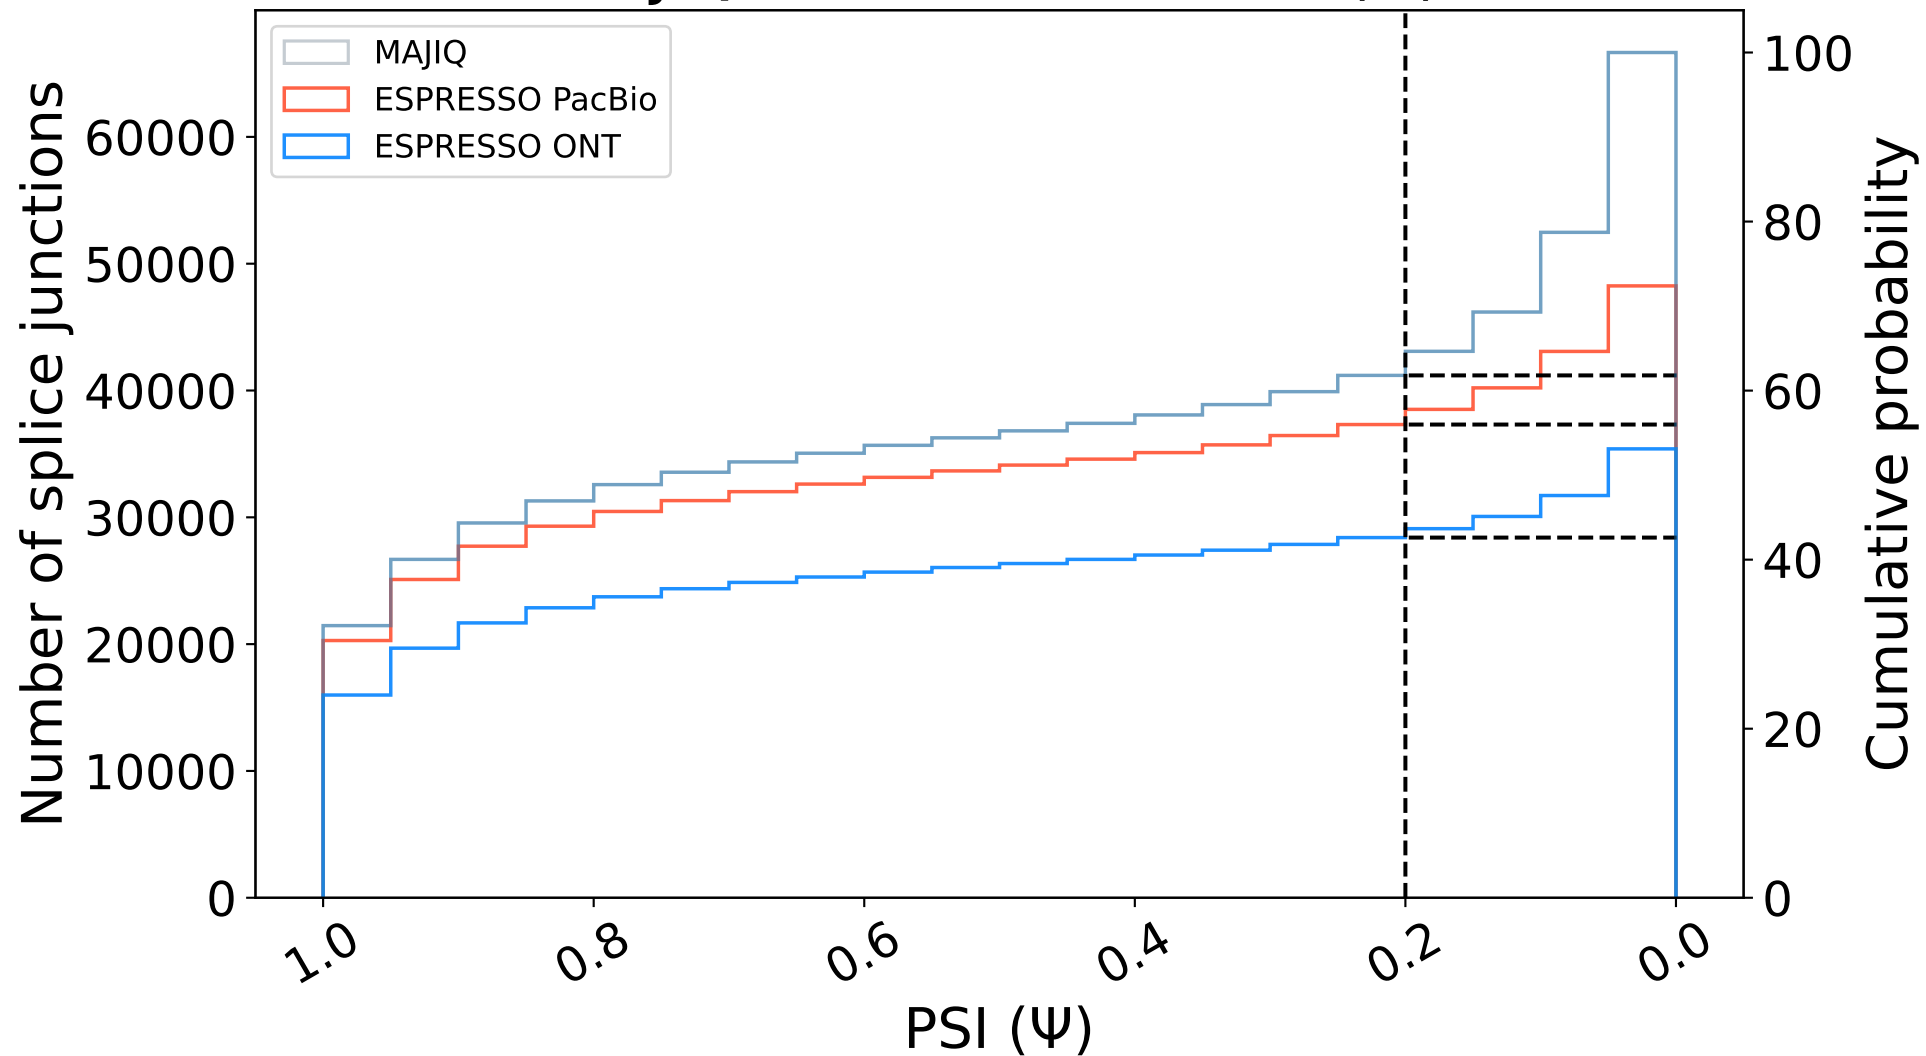

Supplement: Supplemental_code.zip [file Supplemental_Fig_S8B_esp_psi2.pdf › Supplemental_code/figures/Supplemental_Fig_S8/Supplemental_Fig_S8B_esp_psi2.pdf]

# MAJIQ and ESPRESSO reads

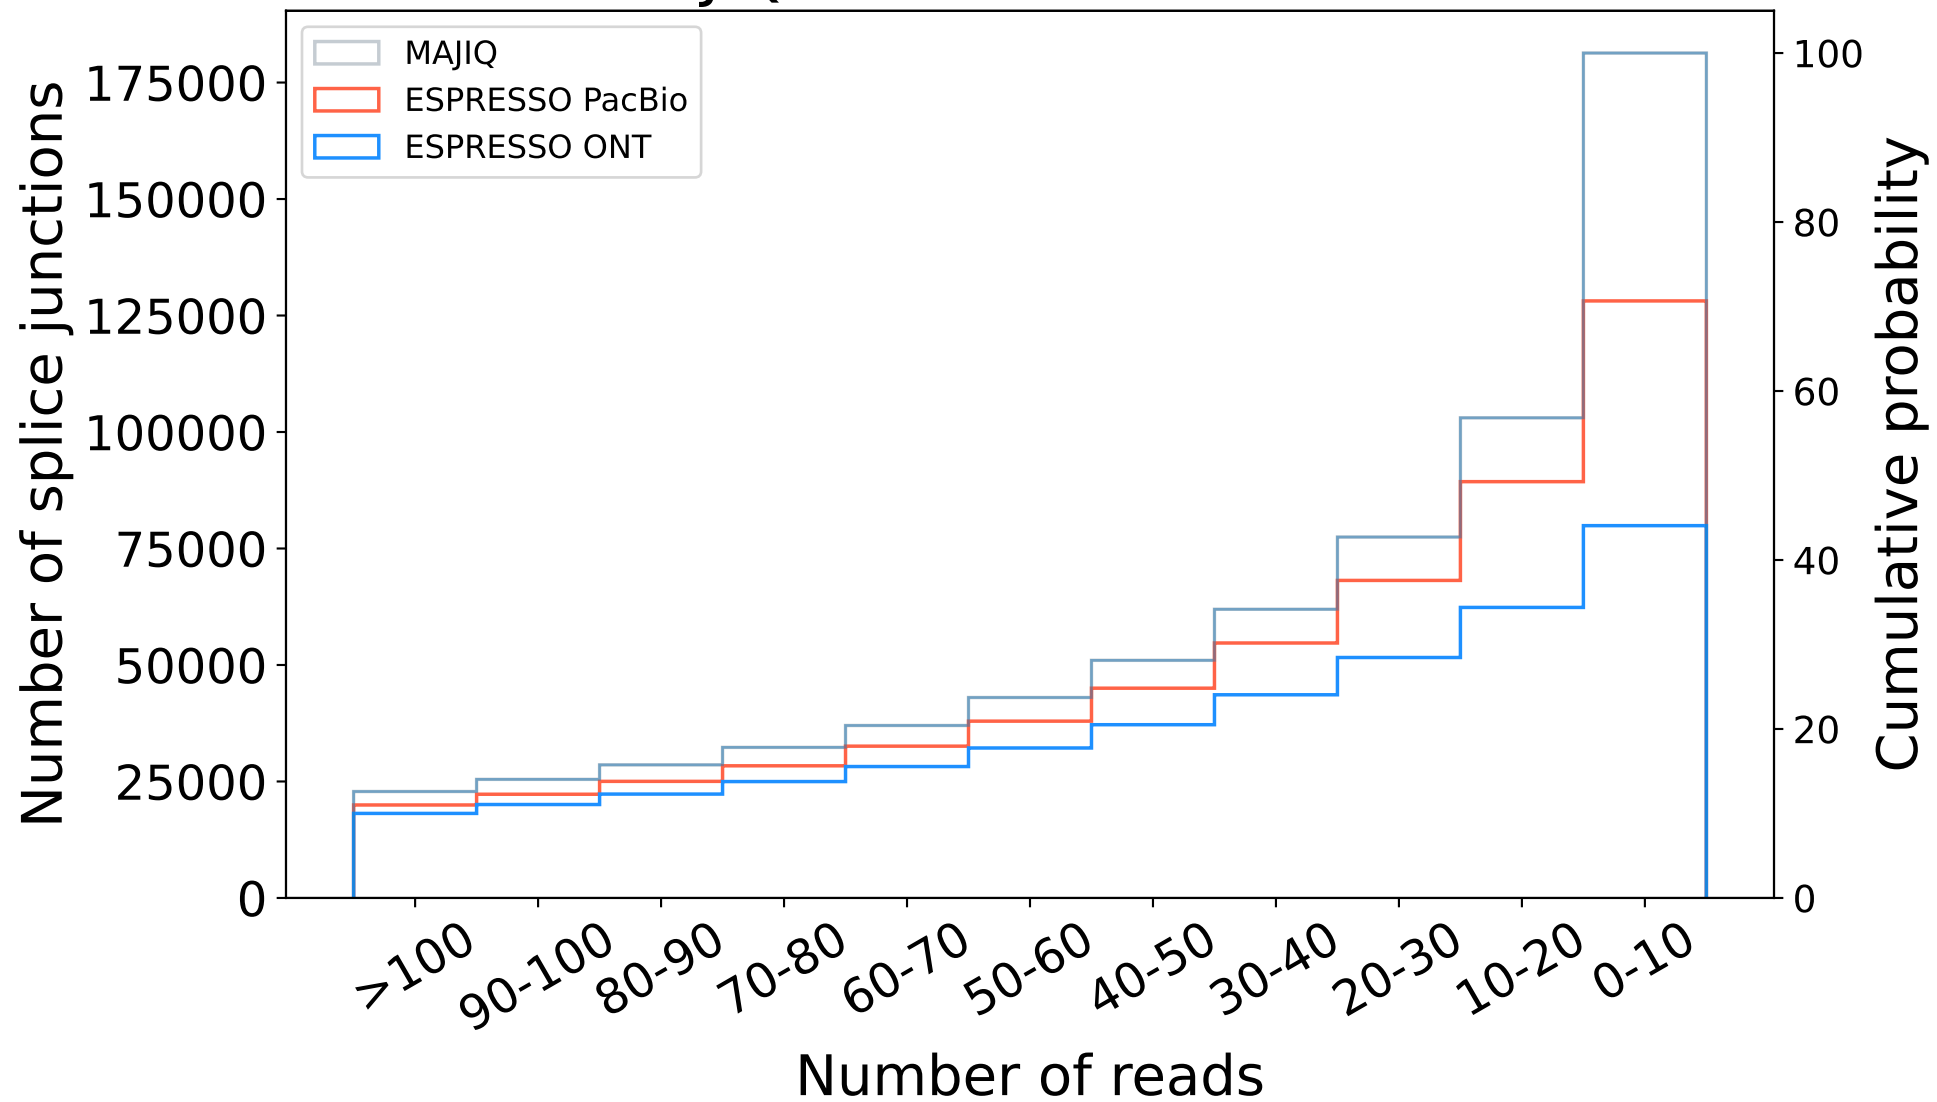

Supplement: Supplemental_code.zip [file Supplemental_Fig_S8B_esp_read2.pdf › Supplemental_code/figures/Supplemental_Fig_S8/Supplemental_Fig_S8B_esp_read2.pdf]

# Bambu LSV non-quantifiability

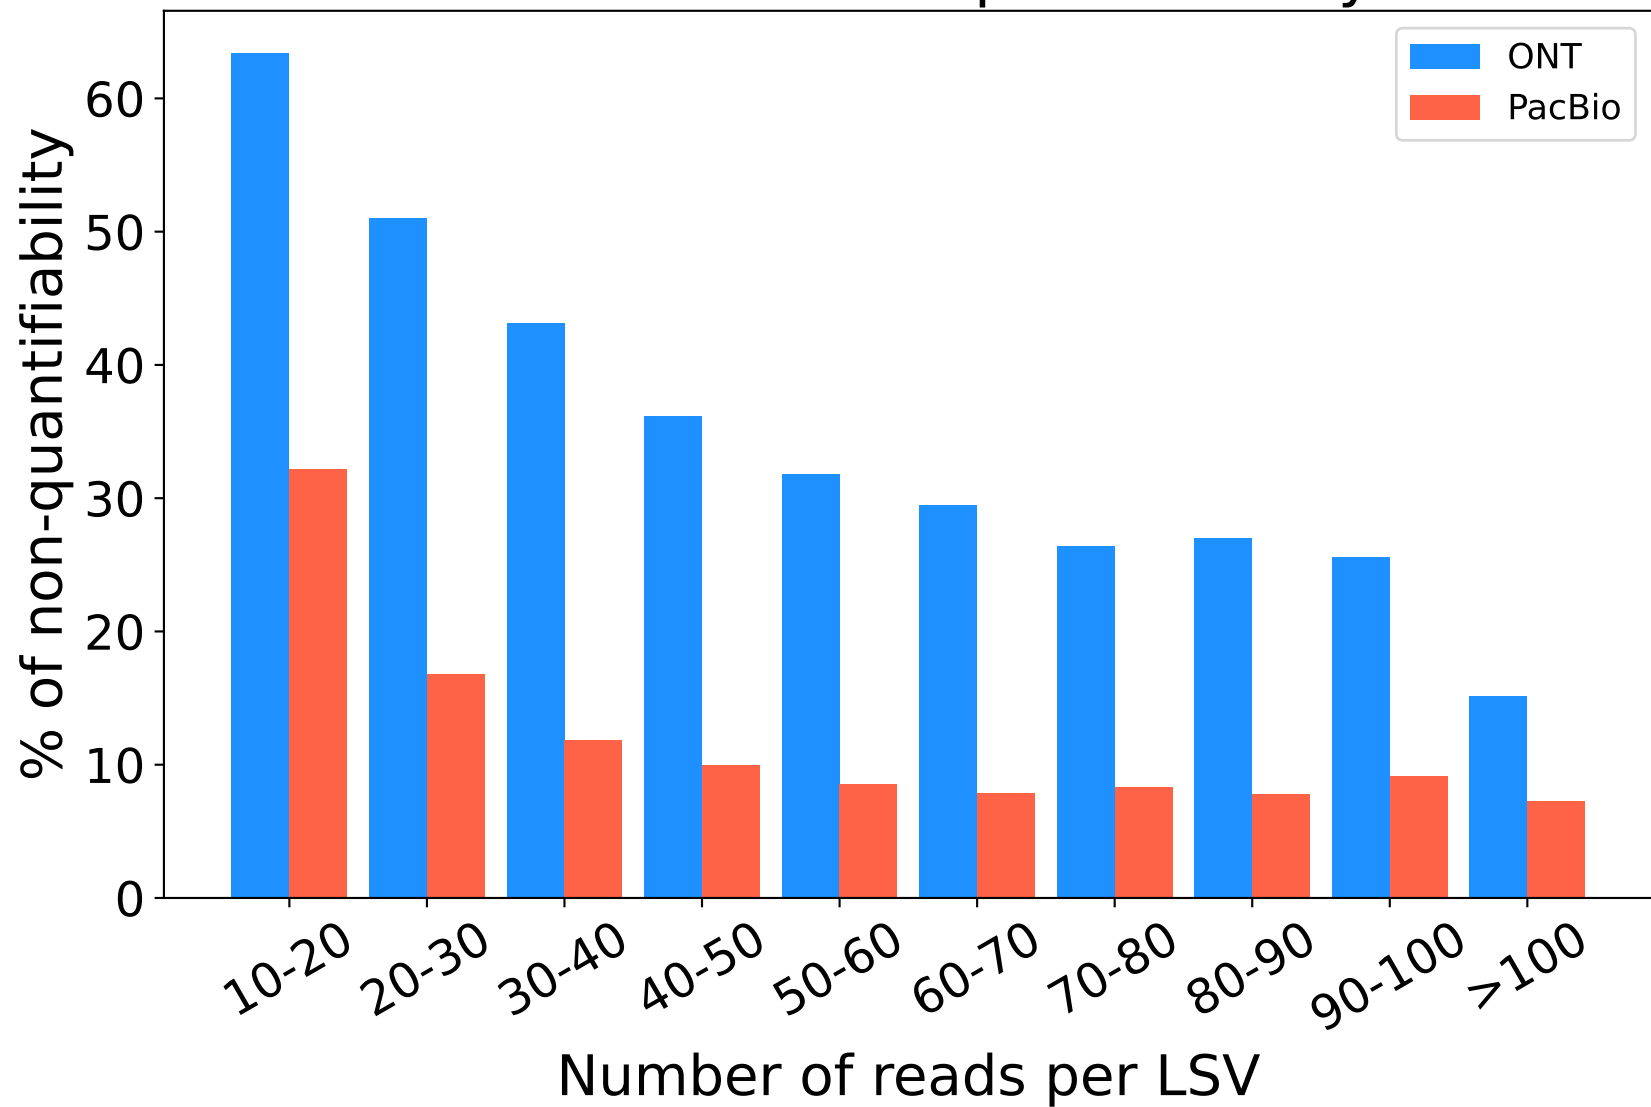

Supplement: Supplemental_code.zip [file Supplemental_Fig_S9A_bambu_lsv.pdf › Supplemental_code/figures/Supplemental_Fig_S9/Supplemental_Fig_S9A_bambu_lsv.pdf]

# ESPRESSO LSV non-quantifiability

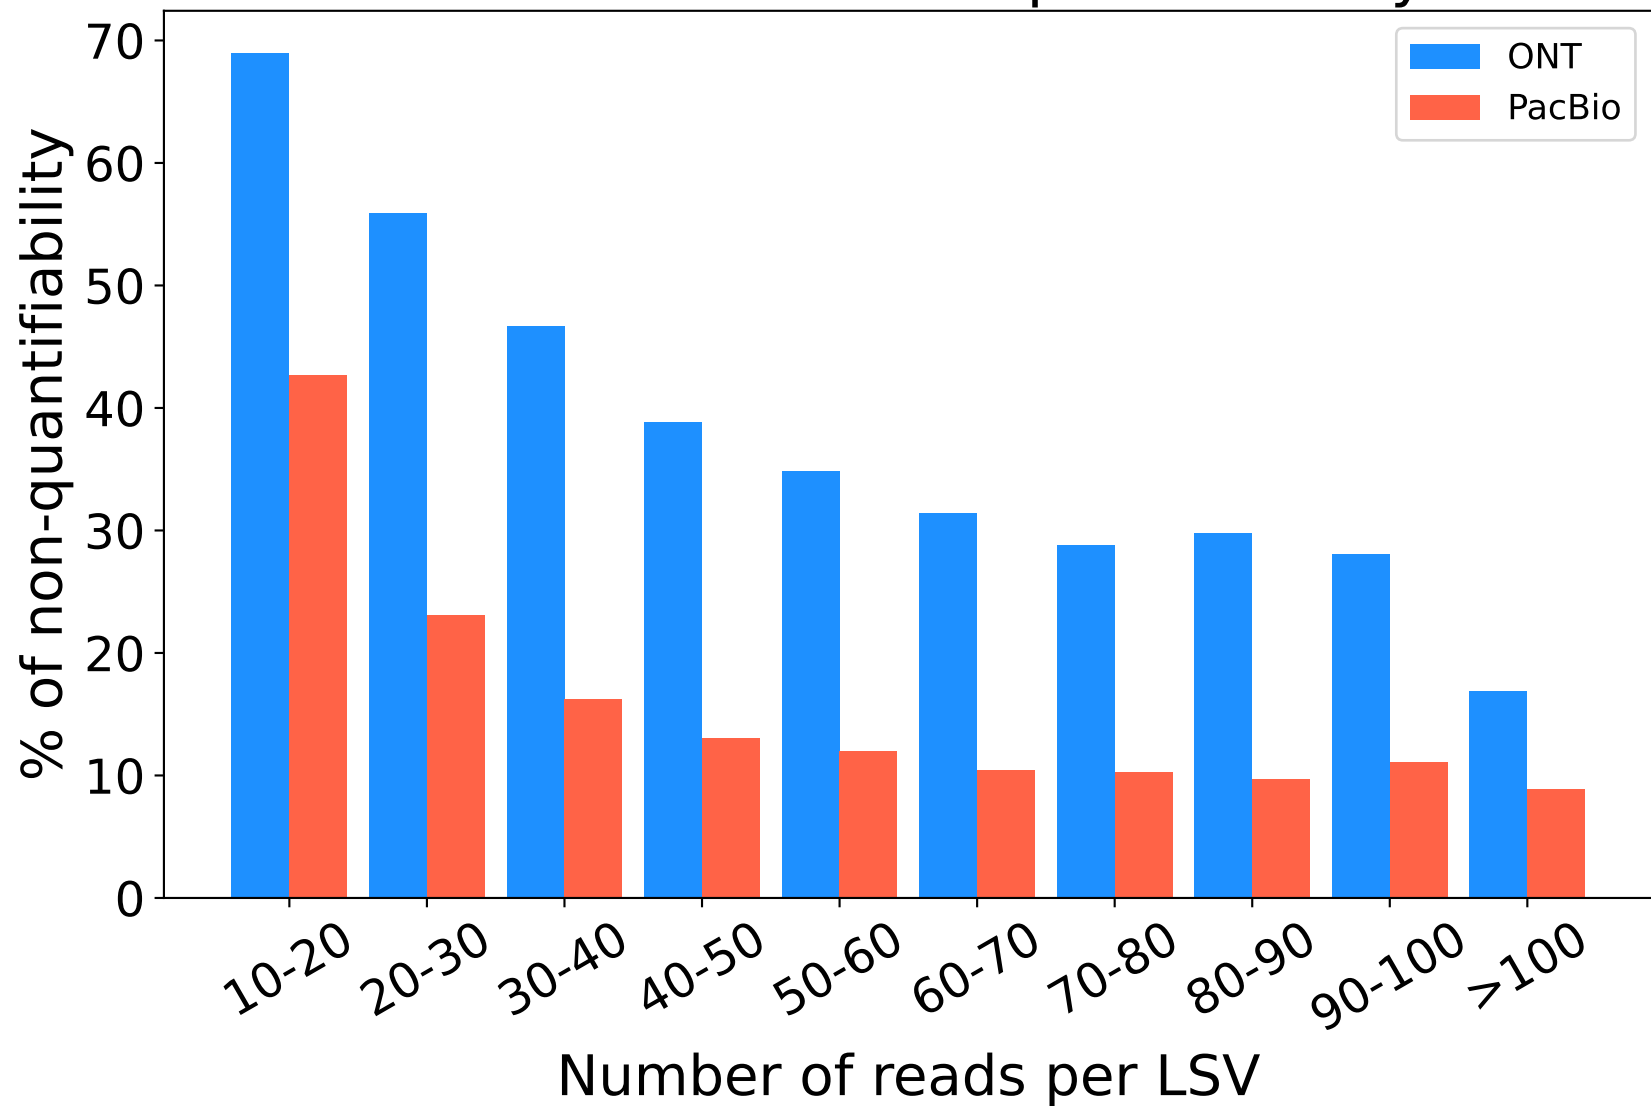

Supplement: Supplemental_code.zip [file Supplemental_Fig_S9A_esp_lsv.pdf › Supplemental_code/figures/Supplemental_Fig_S9/Supplemental_Fig_S9A_esp_lsv.pdf]

# FLAIR LSV non-quantifiability

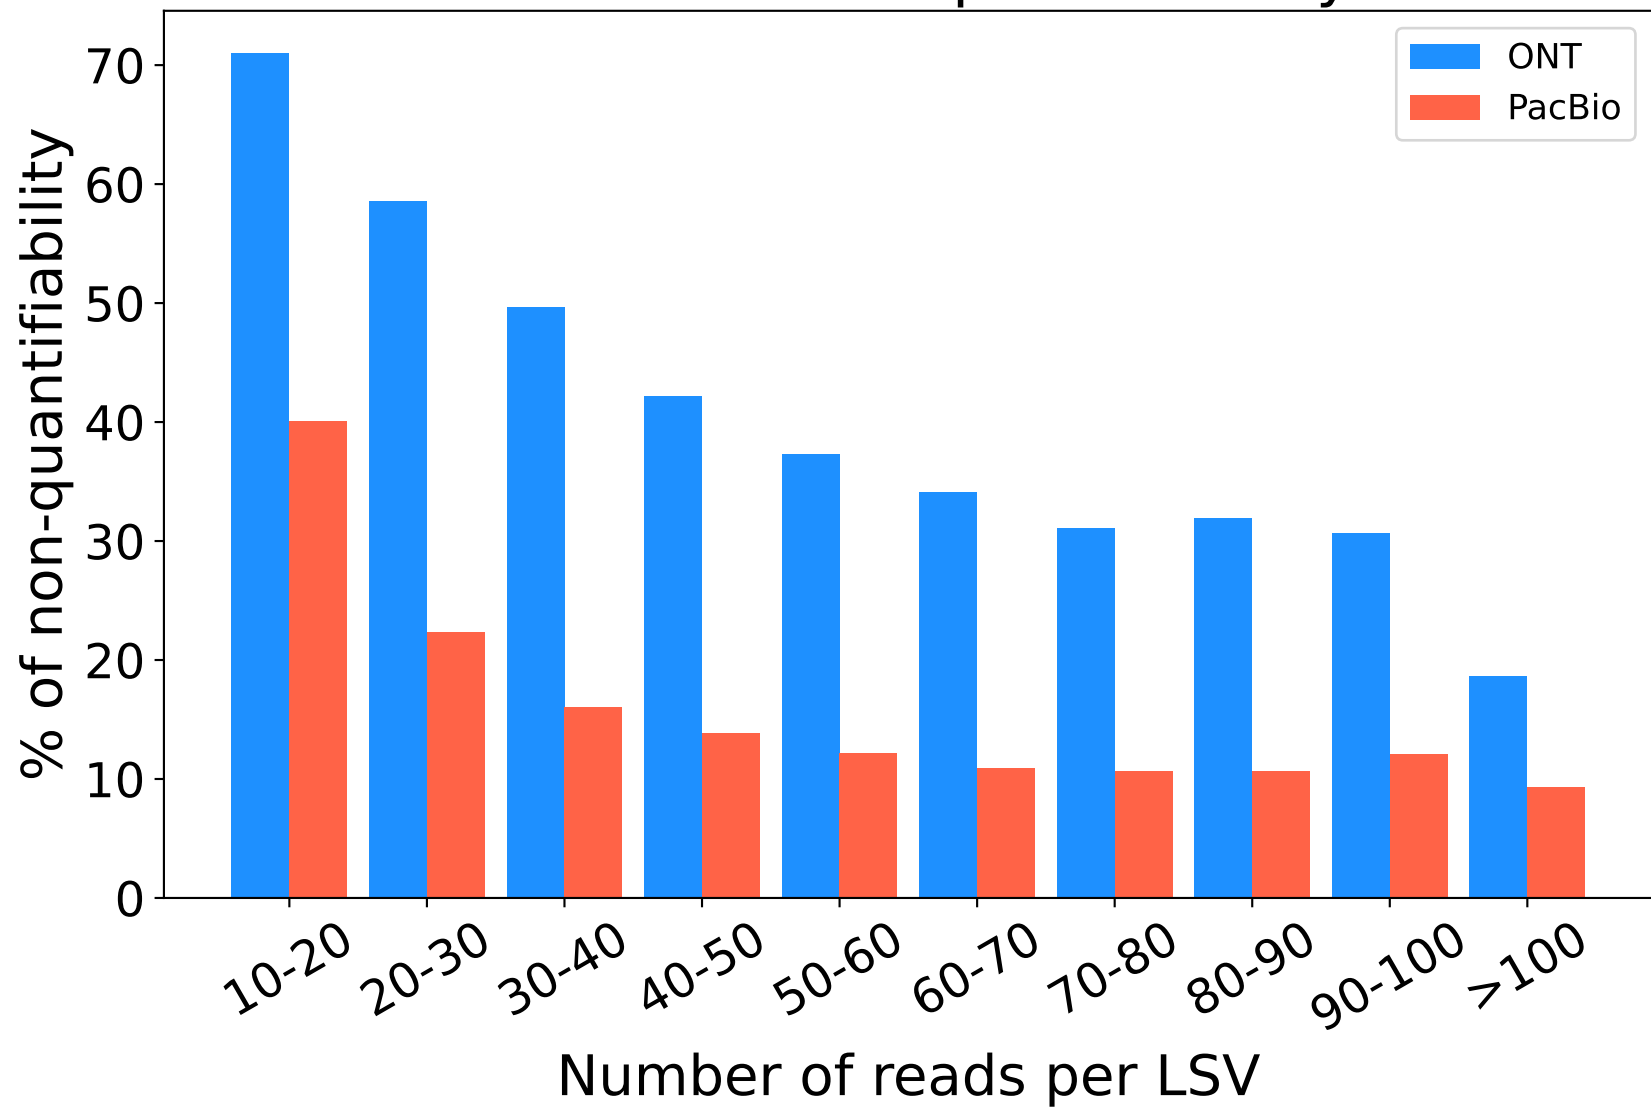

Supplement: Supplemental_code.zip [file Supplemental_Fig_S9A_flair_lsv.pdf › Supplemental_code/figures/Supplemental_Fig_S9/Supplemental_Fig_S9A_flair_lsv.pdf]

# Bambu LSV non-quantifiability from 3' end

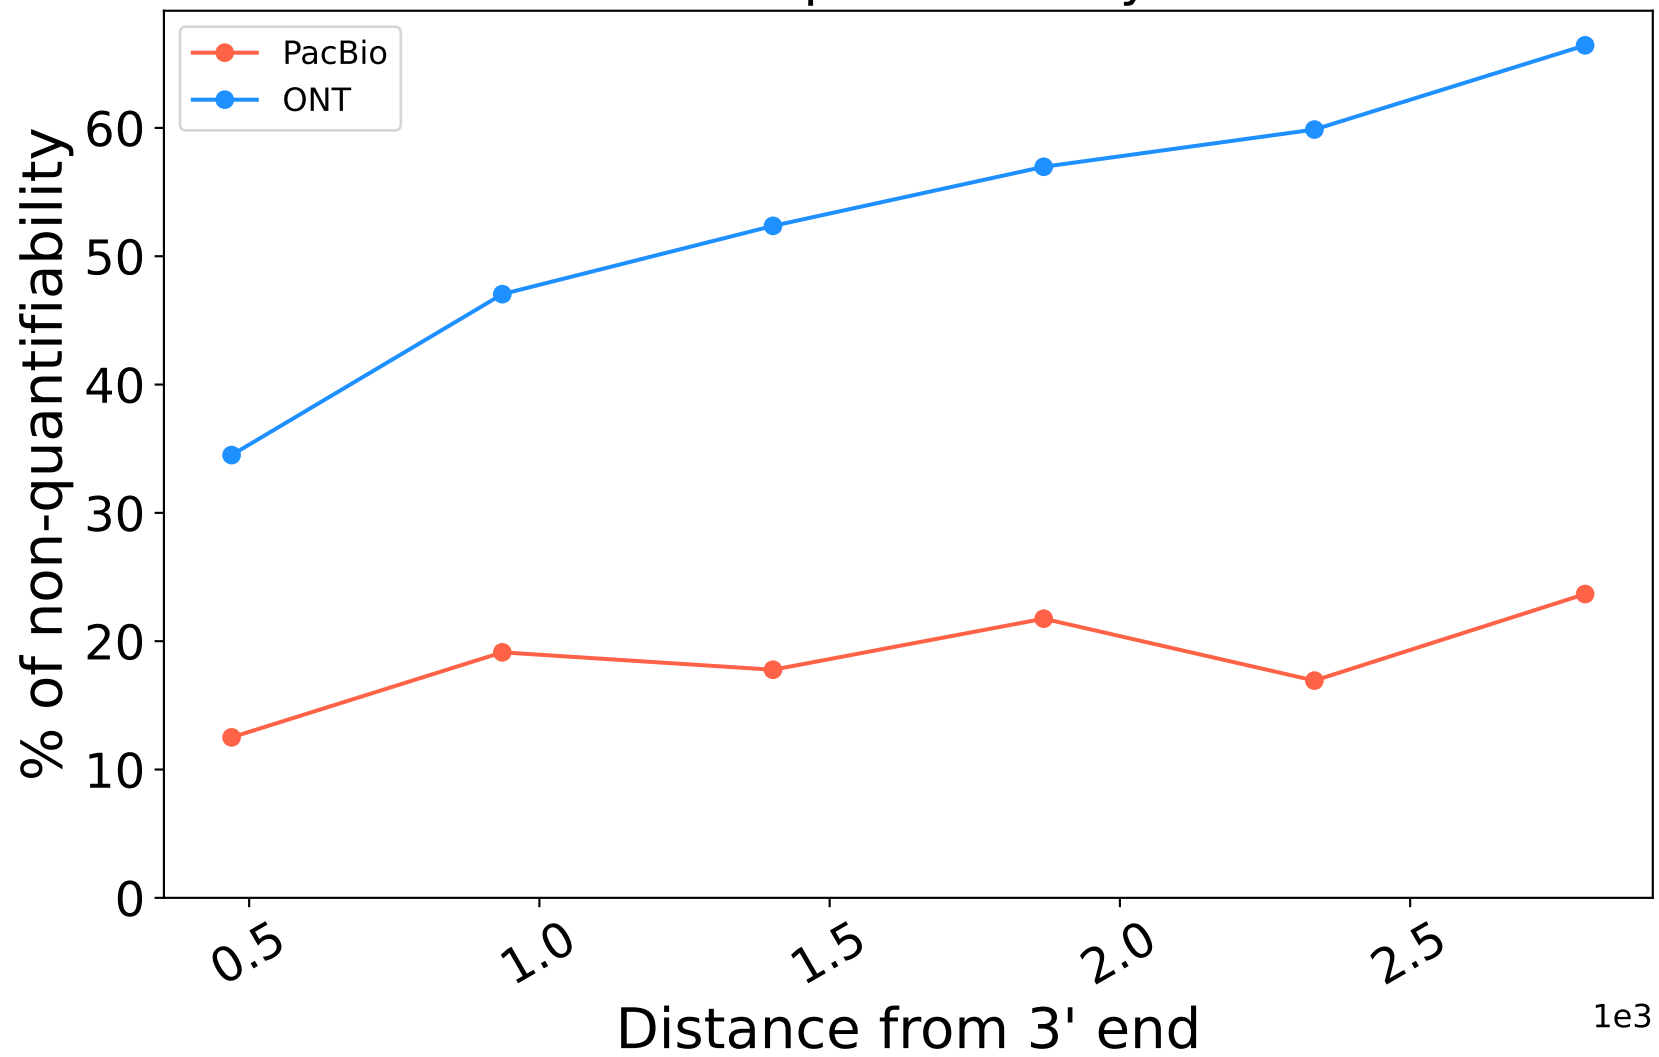

Supplement: Supplemental_code.zip [file Supplemental_Fig_S9B_bambu_distance.pdf › Supplemental_code/figures/Supplemental_Fig_S9/Supplemental_Fig_S9B_bambu_distance.pdf]

# ESPRESSO LSV non-quantifiability from 3' end

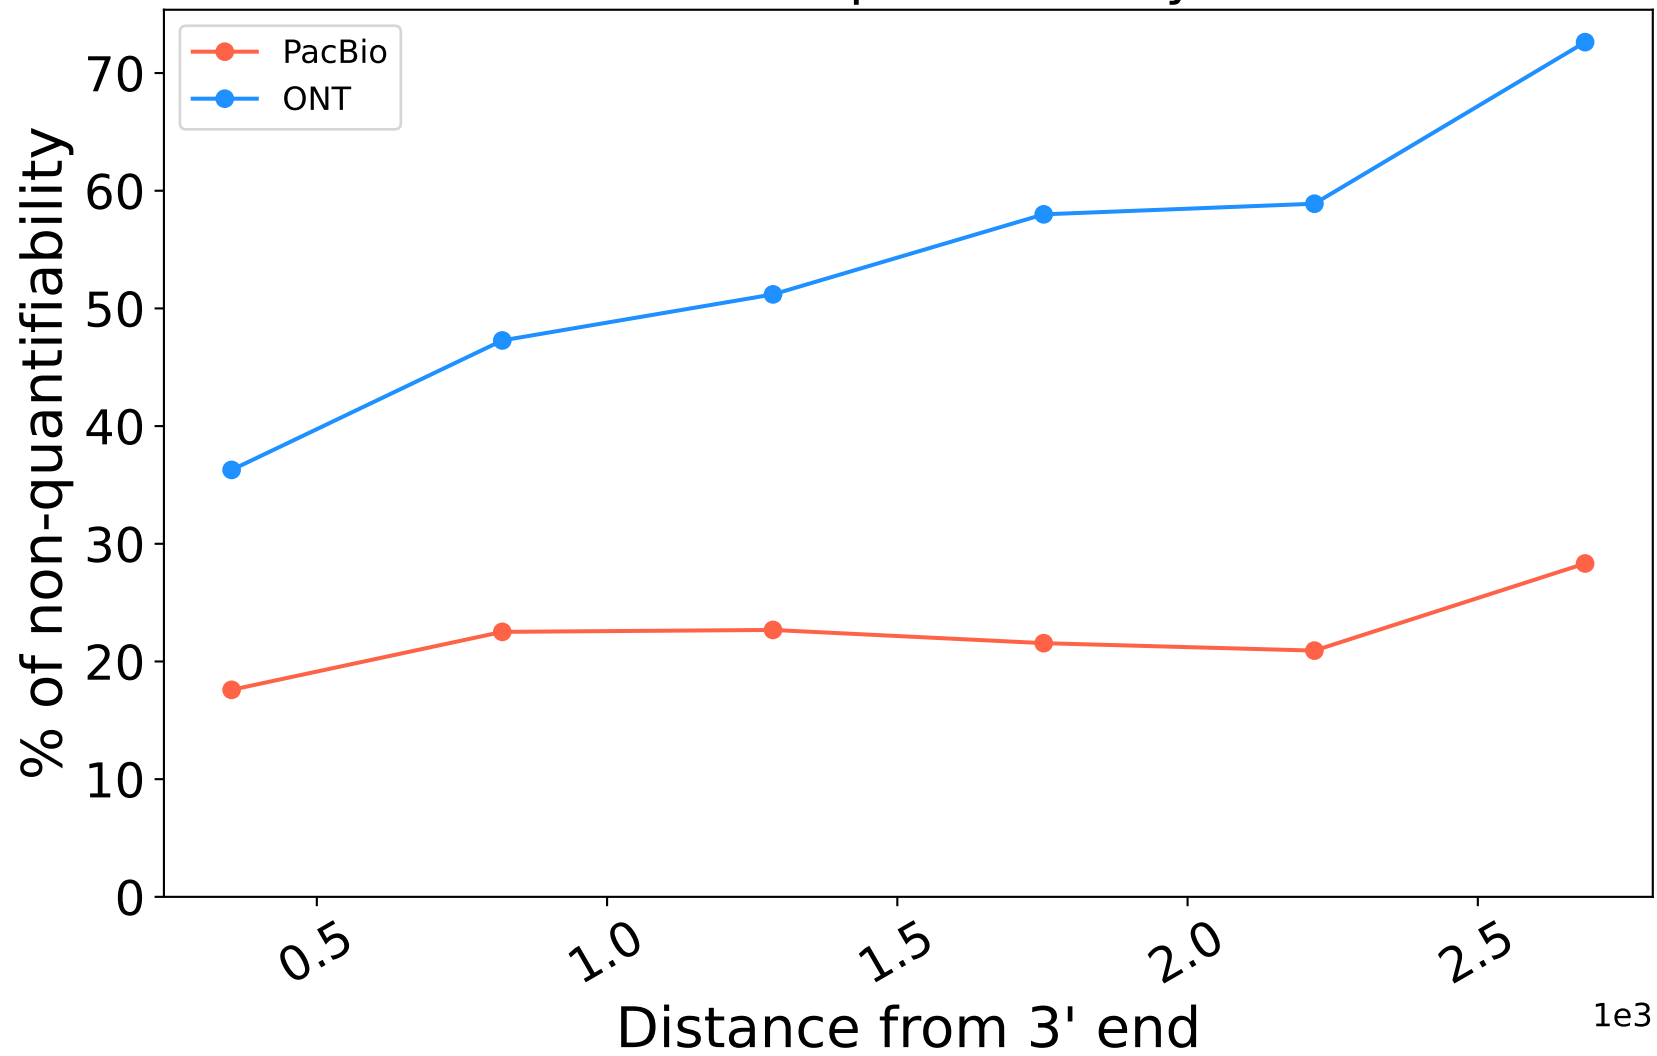

Supplement: Supplemental_code.zip [file Supplemental_Fig_S9B_esp_distance.pdf › Supplemental_code/figures/Supplemental_Fig_S9/Supplemental_Fig_S9B_esp_distance.pdf]

FLAIR LSV non-quantifiability from 3' end

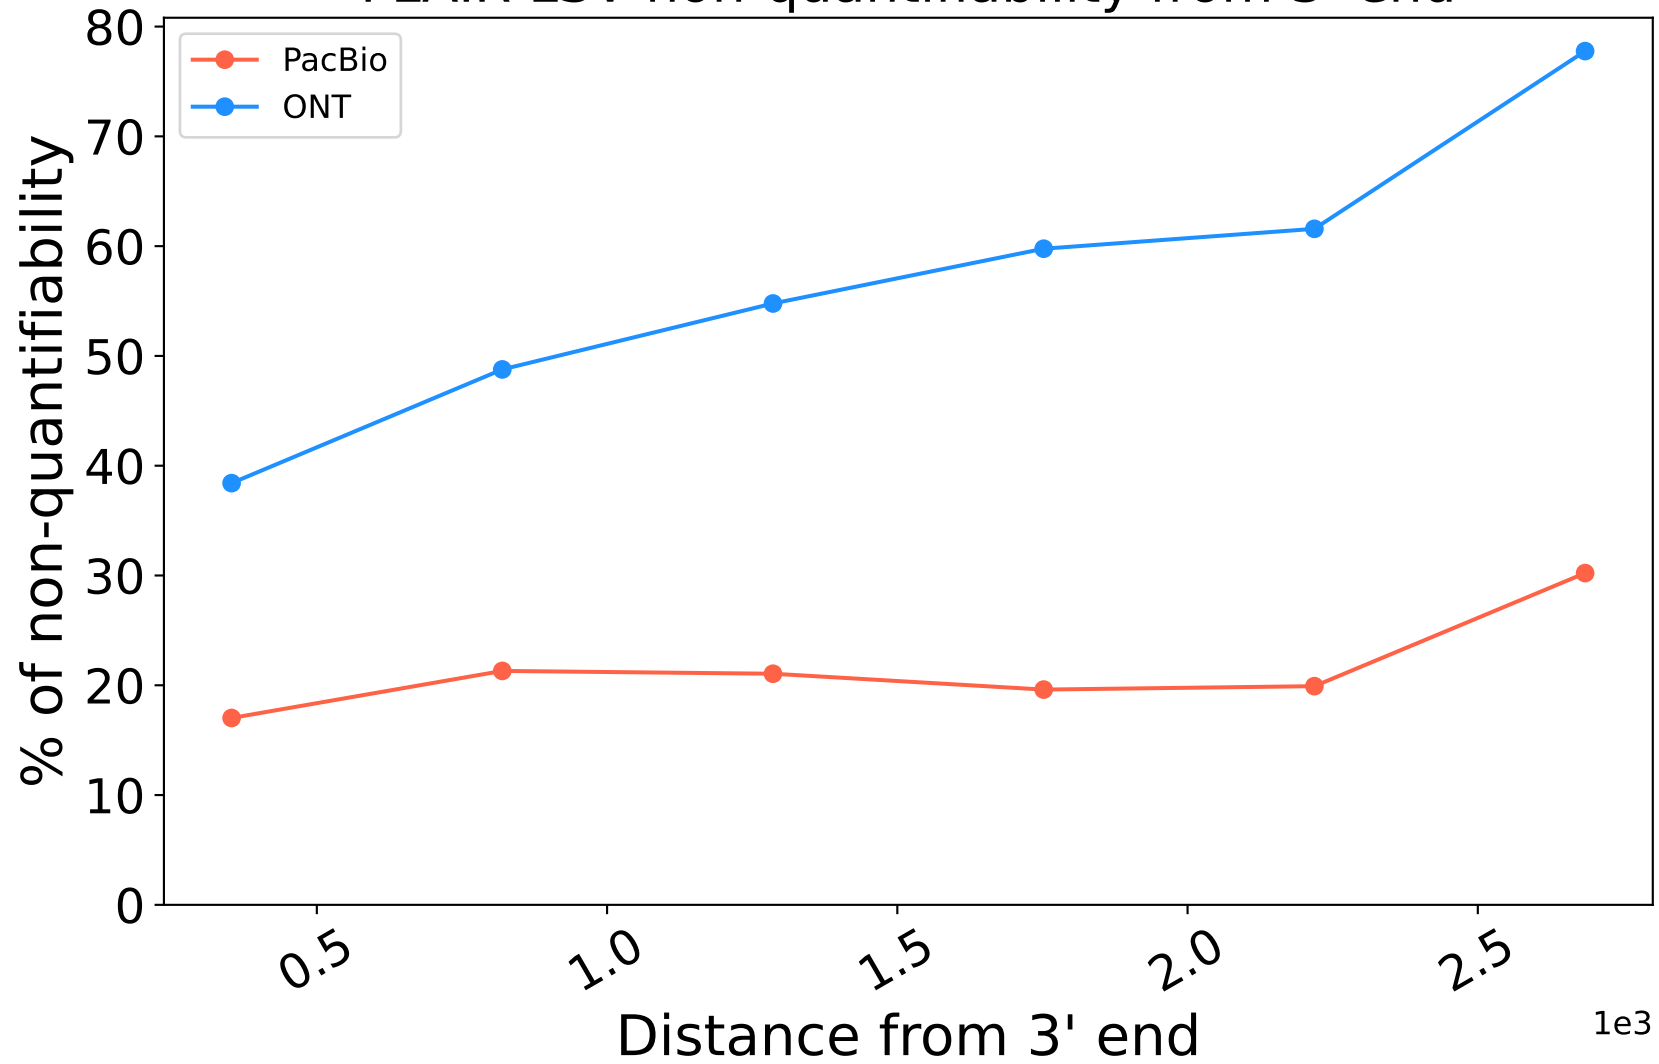

Supplement: Supplemental_code.zip [file Supplemental_Fig_S9B_flair_distance.pdf › Supplemental_code/figures/Supplemental_Fig_S9/Supplemental_Fig_S9B_flair_distance.pdf]
